# Supplementary material for: Multi-omics analysis reveals the panoramic picture of necroptosis-related regulators in pan-cancer
Source: Aging (Albany NY). 2022 Jun 21;14(12):5034–58. doi: 10.18632/aging.204124 (PMC9271292; doi:10.18632/aging.204124)
Supplement: Supplementary Material 1 [file aging-14-204124-s001.xlsx]

## Sheet: Sheet1
sampleCode	primarySite	FADD	FAS	FASLG	MLKL	RIPK1	RIPK3	TLR3	TNF
GTEX-12WSC-0011-R7b-SM-5LU9L	Brain	6.84097	4.42108	0.110998	1.85099	4.10107	0.300993	0.34099	0.160996
GTEX-14A6H-1026-SM-5SIAZ	Adipose Tissue	6.25106	21.4113	0.99103	50.1508	13.9714	37.661	2.46092	0.600985
GTEX-13OW8-2326-SM-5L3I9	Esophagus	6.46119	9.97074	0.0209995	17.6905	10.7212	13.3809	2.03101	0.35099
GTEX-13111-0626-SM-5LZVR	Adipose Tissue	5.72113	10.1506	0.190994	16.4009	19.6506	12.3814	1.131	2.46092
GTEX-ZF2S-1126-SM-4WKHH	Esophagus	10.4911	8.94078	0.141003	6.31114	11.6608	6.04105	3.611	0.441015
GTEX-11P82-1926-SM-5Q5AU	Nerve	5.71083	10.3309	0.0909993	17.7814	10.3209	11.041	1.28103	0.160996
GTEX-13QIC-0011-R1a-SM-5O9CJ	Brain	4.74103	2.20106	0.000999989	3.89089	3.60101	0.630995	0.650987	0.0410009
GTEX-UJMC-1826-SM-3GADT	Muscle	2.841	0.841013	0.000999989	1.33099	5.82113	1.02101	0.220997	0.000999989
GTEX-ZYY3-0226-SM-5E45M	Adipose Tissue	11.241	9.49126	0.000999989	26.5806	26.3604	25.4519	1.50098	0.130996
GTEX-131XG-0126-SM-5K7UJ	Adipose Tissue	17.6012	7.02111	0.0209995	18.4213	16.4715	11.4209	2.44105	7.20101
GTEX-YJ8A-0826-SM-5Q5A7	Blood Vessel	9.05114	14.9606	0.000999989	10.2213	28.621	14.6812	1.941	0.000999989
GTEX-117XS-3126-SM-5GIDP	Brain	6.79089	1.11103	0.0410009	1.50098	10.831	0.801014	0.501006	0.0909993
GTEX-WQUQ-0126-SM-4OOSS	Adrenal Gland	19.1411	15.6014	0.121002	7.0109	8.25118	4.3211	2.04103	0.480997
GTEX-WY7C-0006-SM-3NB3L	Blood	17.6905	5.17084	0.150998	17.7716	4.45091	22.1311	0.0309997	1.44103
GTEX-1122O-1926-SM-5EGIQ	Stomach	3.35102	1.53103	0.100998	4.69101	7.89096	8.93087	0.330999	0.220997
GTEX-U3ZM-1126-SM-4DXUB	Colon	8.8012	7.98117	0.0209995	11.4708	12.0512	23.4108	1.43098	0.0810019
GTEX-1117F-3026-SM-5GZYU	Salivary Gland	11.1009	12.1813	0.38101	16.8514	17.6709	26.0408	2.54101	0.441015
GTEX-ZTTD-1426-SM-4YCEX	Esophagus	14.5113	18.6306	0.141003	10.8807	18.5816	4.80088	3.05104	0.121002
GTEX-XUYS-0226-SM-47JX1	Adipose Tissue	9.9211	8.85075	0.330999	16.0511	19.671	9.87103	4.27108	0.710989
GTEX-13OW5-1126-SM-5J1NR	Heart	1.56103	2.30106	0.000999989	4.77103	2.11096	1.78102	0.110998	0.251007
GTEX-NL3H-0011-R10A-SM-2I3E9	Brain	5.68082	2.05096	0.000999989	3.68101	4.31093	0.231006	0.220997	0.000999989
GTEX-RTLS-0826-SM-2TF5Q	Heart	2.02104	5.21114	0.0309997	8.54097	4.38112	2.9011	0.311003	0.201005
GTEX-13FXS-0011-R1a-SM-5K7U6	Brain	4.92117	2.28105	0.0810019	1.31103	2.82099	0.460988	0.231006	0.0909993
GTEX-11P81-2526-SM-5GU6H	Muscle	4.29096	1.36103	0.000999989	1.41098	3.54111	1.28103	0.130996	0.061002
GTEX-13PDP-0726-SM-5L3HP	Skin	7.75109	7.24106	0.061002	4.28086	16.0812	5.90117	0.970971	0.880992
GTEX-14BIM-0426-SM-5SI9N	Nerve	5.61116	19.5812	0.291002	28.3112	10.2411	6.99101	1.41098	0.000999989
GTEX-RNOR-0826-SM-2TF5C	Heart	1.90105	3.10093	0.061002	5.77091	3.26097	1.64103	0.361007	0.240999
GTEX-YECK-1726-SM-5IFI3	Esophagus	7.13098	10.831	0.150998	16.1314	12.2814	9.50114	1.74098	0.100998
GTEX-117YX-2626-SM-5EQ53	Blood Vessel	13.2113	12.8011	0.000999989	6.37091	16.4909	2.66106	0.390989	0.0309997
GTEX-YEC4-2126-SM-5IFJH	Skin	10.0213	7.65074	0.0309997	8.15113	19.5216	12.0712	0.761017	2.17106
GTEX-13FH7-0226-SM-5IFGG	Adrenal Gland	19.6111	37.3516	0.0209995	5.82113	8.84094	1.56103	6.46119	0.910986
GTEX-PWOO-1226-SM-48TCO	Stomach	9.52091	2.57095	0.291002	12.1906	11.1409	19.4016	0.921017	0.421002
GTEX-139T4-0426-SM-5J1OQ	Nerve	7.26116	40.7323	0.410997	18.6409	13.0611	7.23102	2.09101	0.311003
GTEX-UTHO-1026-SM-3GAF7	Breast	6.77115	10.8709	0.000999989	33.2919	19.7516	8.75071	2.42099	0.201005
GTEX-ZV68-0008-SM-4YCCV	Skin	15.3812	36.6718	0.000999989	8.06123	9.83074	2.98101	2.99094	0.130996
GTEX-Y5LM-0726-SM-4VBRP	Lung	12.9313	14.3811	0.0810019	15.9712	16.0611	13.681	4.92117	0.480997
GTEX-XAJ8-0726-SM-47JY5	Colon	14.1811	16.3113	0.000999989	6.57094	17.2413	4.64089	2.841	0.061002
GTEX-11NSD-1626-SM-5986U	Colon	16.1314	13.7914	0.421002	14.2511	12.3908	21.781	1.79104	0.99103
GTEX-11OF3-1326-SM-5N9FJ	Kidney	4.76112	1.84101	0.0109996	3.74094	3.64091	1.87099	0.701007	0.240999
GTEX-11ZUS-0926-SM-5FQSY	Esophagus	6.39082	11.1309	0.0209995	11.0809	13.5507	10.8913	2.07096	0.201005
GTEX-ZC5H-2726-SM-5KLZW	Salivary Gland	8.93087	10.7809	0.291002	18.091	9.67123	15.9215	1.31103	0.141003
GTEX-Q2AG-0011-R2A-SM-2HMIT	Brain	4.78096	1.18099	0.0410009	2.73094	4.02113	1.64103	0.821026	0.0410009
GTEX-11LCK-1126-SM-5A5KC	Adipose Tissue	9.07124	12.8207	0.0909993	15.9612	20.2507	22.8512	1.52098	0.0410009
GTEX-YJ89-0011-R11a-SM-4SOKA	Brain	7.08123	0.650987	0.000999989	0.201005	13.7513	1.16103	0.061002	0.000999989
GTEX-13W3W-2426-SM-5LU5B	Skin	8.17093	7.87074	0.000999989	7.05086	18.7212	10.3812	0.710989	0.701007
GTEX-TML8-1926-SM-32QOS	Skin	10.6612	7.26116	0.000999989	3.00091	23.3508	9.55132	1.44103	1.46104
GTEX-ZDXO-0011-R2b-SM-4WKFG	Brain	1.20097	0.66099	0.0410009	3.12098	2.43092	0.280992	0.0909993	0.000999989
GTEX-13NYC-0826-SM-5N9FP	Blood Vessel	3.97099	20.0107	0.000999989	11.3012	14.401	0.761017	0.781003	0.000999989
GTEX-R55F-1326-SM-2TF5F	Brain	5.26086	3.20095	0.000999989	7.61107	6.7309	0.99103	0.790973	0.000999989
GTEX-R55D-1226-SM-48FE9	Esophagus	13.4711	14.441	0.130996	10.7413	16.0211	5.9311	1.97096	0.110998
GTEX-ZF29-1626-SM-4WKFJ	Small Intestine	11.7111	13.4609	0.38101	20.1709	19.7407	40.5801	4.83093	1.00097
GTEX-ZTPG-1626-SM-5DUX2	Esophagus	12.8607	5.74099	0.121002	12.631	9.55132	9.6011	1.65095	0.0509985
GTEX-WFG8-1726-SM-5CHTE	Colon	0.000999989	0.000999989	0.000999989	0.000999989	0.000999989	0.000999989	0.000999989	0.000999989
GTEX-ZA64-0926-SM-5HL7H	Adipose Tissue	9.69069	8.54097	0.000999989	21.0405	17.4711	9.64112	0.330999	0.460988
GTEX-ZYWO-1326-SM-5SI8X	Pancreas	2.39098	1.03097	0.0410009	3.6609	6.06119	3.37105	0.99103	0.000999989
GTEX-11ZTT-2426-SM-5EQLS	Skin	12.0311	14.0014	0.000999989	10.4911	21.0508	14.411	1.42099	0.361007
GTEX-OOBK-0226-SM-2YUMF	Adipose Tissue	7.89096	10.2007	0.190994	27.0902	15.9911	15.6208	2.211	0.220997
GTEX-WRHK-0226-SM-4MVOH	Pancreas	2.19102	0.641002	0.000999989	3.62103	5.24085	4.79091	0.710989	0.061002
GTEX-WWTW-0626-SM-4MVNS	Muscle	4.3211	2.75108	0.100998	5.56083	9.59112	2.86096	0.190994	0.190994
GTEX-11DXY-1126-SM-5987W	Blood Vessel	5.21114	18.1211	0.0909993	16.2707	8.73072	10.1506	0.941022	0.260996
GTEX-S32W-1526-SM-4AD6Z	Cervix Uteri	9.30109	12.1813	0.171004	15.9005	13.7513	6.31114	2.25105	0.061002
GTEX-11TT1-1826-SM-5EQLV	Skin	7.68103	6.80078	0.0209995	8.16074	13.1711	16.5711	0.35099	0.580996
GTEX-ZYVF-0926-SM-5E44J	Skin	10.8913	11.3412	0.130996	9.43093	11.2613	9.50114	2.841	8.4908
GTEX-ZPCL-1126-SM-4WWFE	Skin	8.07073	13.9008	0.110998	2.56099	17.5804	7.43122	0.201005	0.671007
GTEX-OOBK-2626-SM-2HMKY	Thyroid	12.8109	8.99111	0.190994	12.2907	17.3504	20.5804	1.83096	0.0309997
GTEX-1269C-0926-SM-5FQSR	Lung	4.4611	46.3597	1.17097	27.5618	3.30099	5.87097	0.910986	4.38112
GTEX-13OVJ-0726-SM-5KM1W	Lung	13.4413	47.9913	0.561011	45.2423	14.191	17.4614	0.790973	0.431012
GTEX-YB5K-2026-SM-4VDT3	Skin	7.83102	9.45122	0.121002	5.84094	15.9911	7.59105	0.751008	0.811015
GTEX-13O3Q-2426-SM-5IJBR	Skin	6.63088	8.69087	0.0209995	7.30103	15.3312	10.5509	0.480997	1.471
GTEX-11NSD-0426-SM-5N9CR	Spleen	15.2211	10.3611	10.5612	57.2221	16.5907	35.3907	0.941022	4.6709
GTEX-131XH-0126-SM-5LZUY	Skin	12.0512	5.25103	0.0209995	6.21089	14.3115	10.7413	0.721014	0.451
GTEX-ZG7Y-1426-SM-4WWBM	Heart	6.39082	5.83082	0.0309997	5.37103	6.40101	3.62103	0.521016	0.0909993
GTEX-ZDXO-2426-SM-5S2NJ	Adipose Tissue	10.3109	16.5608	0.0309997	15.4914	15.311	13.5207	3.59104	0.100998
GTEX-139TS-1426-SM-5IFJD	Liver	4.37111	3.58109	0.671007	4.88108	7.67092	1.39098	0.781003	0.521016
GTEX-S32W-2026-SM-4AD6E	Breast	12.0211	7.35079	0.130996	17.9511	17.1306	15.071	1.58096	0.0710018
GTEX-S95S-0002-SM-3NM8K	Blood	14.3911	65.3629	0.150998	10.3309	3.7311	5.27109	0.0410009	68.2899
GTEX-11TT1-2226-SM-5GU6B	Testis	11.9912	6.98084	0.000999989	2.57095	9.83074	2.611	1.75103	0.0410009
GTEX-OHPK-0006-SM-2HMKH	Blood	19.5609	5.15117	0.130996	25.0615	9.36124	29.8116	0.0209995	0.751008
GTEX-13NYB-0011-R1b-SM-5KM4F	Brain	3.18104	2.51107	0.000999989	1.17097	3.25104	0.571015	0.201005	0.000999989
GTEX-RWS6-0426-SM-47JXH	Blood Vessel	13.6214	14.1507	0.100998	10.7108	12.8714	2.08103	0.311003	0.190994
GTEX-145MH-2326-SM-5O9AW	Testis	7.54123	6.43081	0.100998	1.40104	6.52103	0.910986	1.141	0.141003
GTEX-ZDYS-1726-SM-5HL4Y	Muscle	3.27093	2.211	0.0209995	2.26106	5.58091	0.870973	0.431012	0.000999989
GTEX-RNOR-0011-R7A-SM-2TF4V	Brain	2.9709	1.04102	0.0410009	1.53103	3.77088	1.15101	0.410997	0.0309997
GTEX-12ZZX-0011-R5a-SM-5HL89	Brain	2.49096	6.99101	0.0909993	1.25102	3.081	0.701007	0.330999	0.0309997
GTEX-WFON-1026-SM-4LVMD	Esophagus	11.9009	5.50102	0.0509985	7.50109	13.6006	5.18089	1.27103	0.150998
GTEX-11NSD-1026-SM-5N9BE	Testis	8.24089	5.88116	0.000999989	1.75103	5.91099	2.33092	1.52098	0.0810019
GTEX-11LCK-0526-SM-5A5M9	Thyroid	8.30109	17.0713	0.110998	13.271	15.7306	23.6309	2.06094	0.130996
GTEX-PWN1-1626-SM-2S1OL	Muscle	3.01091	1.34099	0.000999989	2.77099	7.89096	1.54104	0.231006	0.0509985
GTEX-145LU-0011-R3a-SM-5P9K2	Brain	1.74098	1.62102	0.000999989	0.880992	3.51104	0.220997	0.130996	0.0209995
GTEX-131XH-0011-R6a-SM-5KM2G	Brain	2.96103	6.43081	0.0209995	1.49102	3.86107	0.371002	0.35099	0.000999989
GTEX-132NY-2026-SM-5L3FM	Esophagus	6.4509	12.6907	0.130996	11.6108	9.91079	7.81096	2.29104	0.150998
GTEX-XGQ4-0526-SM-4AT6C	Heart	3.35102	2.68105	0.000999989	3.55094	4.10107	3.24091	0.561011	0.130996
GTEX-11EM3-2426-SM-59861	Skin	6.56093	8.79083	0.061002	3.81108	17.1306	9.66118	0.910986	0.121002
GTEX-YEC3-0826-SM-4WWFP	Thyroid	6.92109	5.76092	0.0410009	10.6612	11.4812	21.0012	1.08103	0.0710018
GTEX-11DXZ-0226-SM-5EGGZ	Adrenal Gland	13.8508	19.6206	0.32099	4.4009	8.43098	2.01098	2.71095	0.110998
GTEX-14BMV-0126-SM-5S2PO	Skin	12.9313	14.261	0.0309997	8.14097	21.2413	15.4207	2.08103	1.79104
GTEX-11ONC-2726-SM-5N9DZ	Blood Vessel	5.11098	30.2717	0.330999	21.3417	7.45082	4.49089	1.68098	0.421002
GTEX-11EMC-2626-SM-59864	Muscle	3.82113	2.37101	0.0209995	2.25105	4.76112	0.980983	0.35099	0.0309997
GTEX-XUZC-1626-SM-4BRVP	Breast	17.0406	8.84094	0.240999	13.531	16.4304	10.6413	2.29104	0.150998
GTEX-T5JW-1326-SM-4DM5G	Esophagus	6.77115	18.1815	0.121002	21.781	19.8216	18.6914	1.52098	0.801014
GTEX-ZAB5-1926-SM-5HL7O	Nerve	11.3208	28.2211	0.201005	29.7311	16.2515	13.4013	4.231	0.061002
GTEX-131YS-2826-SM-5EQ47	Skin	7.13098	25.4307	0.330999	16.3906	25.5916	17.5208	1.10099	3.25104
GTEX-13O61-0926-SM-5IFFE	Esophagus	12.3112	10.481	0.110998	14.3413	16.7107	25.9417	2.87109	0.190994
GTEX-ZVP2-0005-SM-51MRK	Blood	20.1513	12.0311	0.451	46.8702	8.98115	27.0714	0.0309997	1.50098
GTEX-ZV7C-0003-SM-4YCF6	Blood	12.8509	71.2491	0.000999989	6.60107	3.17092	7.33095	0.0109996	57.672
GTEX-XMD1-0826-SM-4AT52	Breast	5.88116	25.581	0.100998	23.8018	12.471	15.6914	0.941022	0.431012
GTEX-13PVQ-0126-SM-5SIB4	Skin	6.72111	5.011	0.0309997	2.75108	8.21124	7.66083	0.35099	0.751008
GTEX-O5YU-0008-SM-4E3I7	Skin	28.5219	35.5506	0.0209995	19.4716	11.2707	1.89094	1.50098	0.121002
GTEX-13O21-3026-SM-5J2NI	Lung	11.891	24.8711	0.291002	19.5514	14.2511	16.1314	3.37105	0.99103
GTEX-13OW7-0011-R3a-SM-5O9DA	Brain	2.12093	3.18104	0.0410009	0.93103	2.9011	0.471	0.210998	0.000999989
GTEX-13SLW-0011-R8b-SM-5SI64	Brain	3.92094	2.09101	0.000999989	1.56103	6.06119	0.69102	0.410997	0.000999989
GTEX-S4UY-1426-SM-4AD6Y	Cervix Uteri	12.3814	24.9904	0.0909993	16.4806	18.0709	15.7415	1.96101	0.0309997
GTEX-1122O-2126-SM-5EGIR	Skin	10.5612	5.52089	0.100998	2.31097	17.1508	6.41078	0.460988	0.561011
GTEX-QEG5-1826-SM-4R1JP	Adrenal Gland	12.4813	31.6602	0.000999989	14.7414	12.3608	2.05096	2.03101	0.0710018
GTEX-WFJO-0926-SM-4LVM2	Small Intestine	20.1806	11.891	0.590988	29.8219	18.6215	42.5297	2.25105	5.3811
GTEX-WRHK-1126-SM-4MVOJ	Colon	10.6612	9.72097	0.0810019	8.0111	17.5111	5.72113	1.01101	0.580996
GTEX-YB5E-0426-SM-5IFHR	Spleen	13.5011	14.971	1.41098	44.2314	20.5904	28.4213	1.33099	3.30099
GTEX-N7MS-0007-SM-2D7W1	Blood	1.11103	1.17097	0.830988	6.96103	1.69103	6.57094	0.0810019	3.20095
GTEX-QXCU-0326-SM-2TC63	Thyroid	4.08094	7.86093	0.0309997	21.3609	40.2802	63.3819	0.891002	0.561011
GTEX-OHPK-0008-SM-4E3JL	Skin	24.4608	39.2114	0.000999989	10.6908	13.7114	4.80088	2.47101	0.0410009
GTEX-14BIN-0011-R10a-SM-5S2UA	Brain	4.34092	1.28103	0.000999989	0.641002	2.85106	0.0810019	0.110998	0.000999989
GTEX-ZDYS-0002-SM-4WKGR	Blood	13.7513	11.7411	1.42099	39.9217	11.9207	21.8112	0.201005	0.880992
GTEX-OXRK-0126-SM-3NB1E	Adrenal Gland	14.461	65.051	0.0209995	5.18089	11.5306	1.48103	4.69101	0.061002
GTEX-11ZUS-0006-SM-5O9AJ	Blood	5.19096	22.8909	9.97074	50.9426	6.82108	28.0806	0.141003	21.7012
GTEX-UJHI-0726-SM-3DB92	Lung	5.82113	29.5503	0.330999	35.6616	17.4107	19.4716	1.76101	0.401007
GTEX-13S7M-1726-SM-5RQK3	Uterus	6.54095	40.9701	0.0410009	17.1116	16.4213	6.93118	0.910986	0.000999989
K-562-SM-4OOR8	Bone Marrow	15.4314	0.730978	0.0309997	3.65102	12.7013	0.390989	0.061002	0.491002
GTEX-QEL4-1026-SM-4R1JK	Blood Vessel	12.3711	18.0409	0.0209995	9.65114	13.9008	4.69101	1.02101	0.0509985
GTEX-WEY5-2126-SM-3GILK	Blood Vessel	4.12102	15.8312	0.000999989	2.42099	21.7916	0.460988	0.300993	0.061002
GTEX-TSE9-0626-SM-3DB8B	Thyroid	4.00111	21.3106	0.401007	11.7314	12.7807	27.3904	1.05103	2.35104
GTEX-YJ8O-1026-SM-5CVM5	Ovary	8.15113	50.1508	0.0710018	4.64089	6.07086	0.730978	2.22099	0.0810019
GTEX-139YR-2226-SM-5IFFW	Small Intestine	15.7208	15.1905	1.10099	17.4808	13.8211	23.0613	3.98091	0.571015
GTEX-13CZV-0011-R5a-SM-5K7XA	Brain	3.80106	9.47089	0.000999989	3.15098	3.87098	0.410997	0.181005	0.000999989
GTEX-UJHI-1026-SM-4IHJP	Stomach	9.06119	13.5714	0.231006	10.6008	16.991	3.69097	3.4909	0.390989
GTEX-ZAB4-1826-SM-5HL8O	Nerve	8.38087	9.94106	0.0309997	9.71087	21.1004	5.18089	0.821026	0.100998
GTEX-1399S-0926-SM-5PNVQ	Blood Vessel	12.5708	14.3612	0.390989	14.2907	10.5912	13.5611	1.30098	3.00091
GTEX-Y9LG-0926-SM-4VDS6	Esophagus	7.32079	5.33098	0.0410009	7.73124	11.0909	3.90088	0.35099	0.0909993
GTEX-ZZPU-2226-SM-5EGIV	Vagina	10.2213	6.88091	0.0710018	10.7012	11.041	13.6507	3.3311	0.000999989
GTEX-139T6-0826-SM-5J1O2	Esophagus	6.75099	8.59085	0.0209995	7.03085	14.5213	6.641	0.921017	0.271007
GTEX-13FTX-0726-SM-5N9BI	Stomach	6.84097	0.980983	0.141003	6.44107	9.11094	13.3207	1.19102	0.0509985
GTEX-ZF2S-0326-SM-4WKGD	Spleen	15.0908	9.90118	4.48094	33.3312	13.6412	28.141	1.241	3.20095
GTEX-ZQUD-0626-SM-51MR2	Esophagus	4.10107	5.69107	0.100998	6.2208	11.1812	2.841	0.361007	0.790973
GTEX-WQUQ-0426-SM-3MJFU	Skin	9.11094	6.74117	0.0209995	6.61114	17.2306	8.00111	1.07103	0.531006
GTEX-139T8-0526-SM-5KLZL	Muscle	3.30099	3.7311	0.0509985	3.76096	6.25106	2.75108	0.300993	0.0810019
GTEX-QV31-0326-SM-447BM	Blood Vessel	16.2009	14.6812	0.231006	13.0114	19.7106	2.52101	1.86103	0.641002
GTEX-X4EP-0526-SM-3P5YW	Lung	10.6708	37.5411	1.85099	55.0817	18.9116	19.8615	3.92094	6.641
GTEX-T2YK-0008-SM-4DM6M	Skin	25.4413	38.0204	0.0509985	11.8507	13.8508	1.131	5.72113	0.130996
GTEX-131YS-1626-SM-5HL6C	Liver	3.52104	4.85106	0.431012	3.92094	5.73105	0.980983	0.880992	0.121002
GTEX-144GM-1926-SM-5LUAN	Adipose Tissue	8.101	12.3206	0.130996	36.2498	21.5214	27.6403	1.08103	0.190994
GTEX-OIZG-0526-SM-2HMLF	Lung	5.92083	24.2313	0.300993	38.2822	16.1012	10.1211	4.22104	1.84101
GTEX-131YS-0011-R1a-SM-5DUXC	Brain	3.38112	3.93101	0.0209995	3.51104	3.53106	1.241	0.451	0.460988
GTEX-ZE9C-0011-R3a-SM-4WKGT	Brain	3.65102	4.29096	0.0109996	3.9411	3.75106	0.861009	0.231006	0.0209995
GTEX-XQ8I-2126-SM-4BOOM	Colon	9.7412	11.8408	0.0309997	11.2808	12.7807	32.5616	2.45105	0.231006
GTEX-ZF3C-0226-SM-4WWB3	Adipose Tissue	8.40123	24.0806	0.171004	23.0517	13.0213	18.4814	2.52101	0.431012
GTEX-ZUA1-0826-SM-4YCDL	Heart	1.11103	1.71095	0.0410009	3.15098	2.54101	2.361	0.171004	0.210998
GTEX-U3ZH-0326-SM-51MS7	Heart	3.39097	1.79104	0.0209995	2.56099	3.32096	2.01098	0.291002	0.061002
GTEX-13SLX-0011-R4a-SM-5O9BJ	Brain	1.83096	2.72093	0.0909993	2.59098	2.56099	0.280992	0.271007	0.0710018
GTEX-RVPV-1726-SM-2TF5W	Lung	2.41095	94.8582	2.23101	56.5008	17.2712	17.811	3.65102	6.12114
GTEX-XV7Q-2326-SM-4BRVZ	Breast	15.851	11.9912	0.121002	22.9115	15.1107	13.6308	2.43092	0.061002
GTEX-YEC4-0126-SM-4W21T	Spleen	9.17113	9.65114	2.39098	54.3798	18.8514	32.3501	0.740977	4.24099
GTEX-P78B-0726-SM-2S1O2	Blood Vessel	6.94079	14.401	0.000999989	6.65113	15.1107	1.05103	0.941022	0.000999989
GTEX-QEL4-0008-SM-447AZ	Skin	19.2609	55.6303	0.000999989	7.80122	17.8308	5.33098	7.89096	0.100998
GTEX-Q2AI-0926-SM-48U1F	Colon	21.511	12.5412	0.0509985	13.6914	14.971	33.2504	2.75108	0.680987
GTEX-WYVS-2426-SM-3NMA9	Nerve	9.9211	24.5117	0.0209995	18.7004	16.6714	8.96125	1.36103	0.141003
GTEX-13PL7-2526-SM-5IFGR	Colon	12.1014	10.6612	0.371002	9.11094	14.5113	34.4015	3.41101	0.291002
GTEX-ZLWG-0626-SM-4WWFR	Lung	15.0209	27.1203	0.171004	19.5013	17.7015	15.1611	4.90108	1.48103
GTEX-ZF2S-0626-SM-4WKH2	Lung	13.8912	29.0306	3.06099	31.22	16.5608	28.0514	7.35079	1.141
GTEX-12WSL-0005-SM-5NQAD	Blood	29.0708	9.18131	0.32099	38.5698	8.27122	33.382	0.0109996	0.830988
GTEX-O5YV-1826-SM-2YUNI	Nerve	8.371	9.98111	0.0309997	14.6507	15.6914	11.2208	1.33099	0.0710018
GTEX-13FH7-1926-SM-5J2OL	Adipose Tissue	9.6011	4.45091	0.000999989	13.9714	20.4709	8.46083	2.02104	0.100998
GTEX-1497J-0226-SM-5QGPU	Skin	14.6406	6.38108	0.0309997	3.15098	23.7705	7.05086	0.680987	0.171004
GTEX-147F4-0006-SM-5O99T	Blood	0.38101	0.361007	0.121002	2.52101	0.34099	0.99103	0.0109996	0.38101
GTEX-11ZVC-0526-SM-5N9G1	Heart	2.41095	6.09109	0.0909993	10.0812	4.70111	4.9909	0.850982	0.061002
GTEX-131XG-0926-SM-5LZW5	Esophagus	14.8305	11.051	0.000999989	8.92097	23.8018	6.21089	0.590988	0.390989
GTEX-12ZZY-0226-SM-5LZVE	Skin	12.8607	9.24069	0.141003	4.42108	20.6805	9.54073	1.17097	1.68098
GTEX-QV44-1226-SM-4R1KE	Stomach	4.07105	1.42099	0.421002	3.84105	4.83093	6.74117	0.571015	0.0209995
GTEX-14753-0011-R10b-SM-5S2WE	Brain	1.25102	3.45097	0.000999989	0.99103	2.64103	0.0509985	0.121002	0.0209995
GTEX-ZLFU-1726-SM-4WWBU	Prostate	12.6608	10.6908	0.0309997	7.20101	14.7506	6.90097	1.65095	0.061002
GTEX-13JVG-0226-SM-5J1MW	Adipose Tissue	5.6209	14.0715	0.110998	31.2807	9.31077	28.2818	1.82096	0.421002
GTEX-N7MS-0011-R8a-SM-2YUMK	Brain	2.57095	2.34096	0.0509985	5.30113	4.07105	2.72093	2.20106	0.371002
GTEX-13U4I-0926-SM-5LU5A	Blood Vessel	10.3009	35.2903	0.201005	7.34112	13.9211	5.98106	3.60101	0.34099
GTEX-1399S-0226-SM-5IFFG	Spleen	16.3215	11.631	1.57102	39.4321	17.8407	25.8304	1.18099	8.50081
GTEX-139D8-0726-SM-5P9GJ	Muscle	4.78096	2.18102	0.000999989	2.15099	7.97122	1.46104	0.121002	0.910986
GTEX-13N11-0126-SM-5KM2Z	Spleen	16.6413	12.3112	7.16119	51.3716	17.7408	23.0613	0.761017	3.32096
GTEX-SIU7-1626-SM-4BRUK	Breast	17.811	14.3512	0.401007	24.9609	23.6817	26.3403	2.49096	1.33099
GTEX-XOT4-0008-SM-4B664	Skin	19.7804	44.4897	0.000999989	7.8408	12.8509	5.56083	4.69101	0.110998
GTEX-12WSA-1426-SM-5EGJU	Esophagus	14.7414	9.46105	0.251007	22.9815	15.4207	23.5818	2.54101	0.150998
GTEX-PW2O-1926-SM-2S1OB	Blood Vessel	5.39118	15.8708	0.000999989	4.3211	17.3408	0.410997	1.99101	0.000999989
GTEX-144GN-0826-SM-5LU5G	Pancreas	3.37105	2.95099	0.0710018	4.41098	8.4908	5.27109	3.03101	0.210998
GTEX-QCQG-0126-SM-48U27	Adrenal Gland	10.5108	55.1925	0.0509985	6.78101	9.48074	2.06094	4.231	0.590988
GTEX-Y5V5-1326-SM-4V6G9	Adrenal Gland	9.61109	27.5618	0.0309997	6.16115	6.79089	2.29104	2.9709	0.0810019
GTEX-ZYY3-1226-SM-5EQKM	Blood Vessel	6.11096	13.5507	0.061002	17.811	7.24106	1.73099	0.880992	0.160996
GTEX-WFG7-1526-SM-4LVMG	Colon	16.7408	11.8713	0.160996	14.3006	12.301	29.0004	2.69092	0.541
GTEX-ZAJG-1626-SM-5HL7I	Adipose Tissue	8.15113	30.36	0.0909993	47.4718	14.451	11.3114	4.50086	0.361007
GTEX-ZV6S-2126-SM-4YCEM	Muscle	9.02108	0.870973	0.000999989	2.47101	7.68103	1.58096	0.210998	0.0410009
GTEX-13O3O-0011-R7b-SM-5P9GZ	Brain	2.65093	1.45095	0.0309997	2.29104	4.03089	0.220997	0.190994	0.0109996
GTEX-13QBU-1926-SM-5IJEW	Small Intestine	10.631	12.5412	0.201005	33.0505	20.6004	31.9402	1.31103	1.01101
GTEX-13SLW-2826-SM-5Q5ES	Colon	6.30108	23.6604	0.110998	14.2215	13.9414	9.7412	4.96089	0.000999989
GTEX-WHPG-1526-SM-4M1ZK	Adrenal Gland	10.6111	36.6413	0.0209995	9.38073	10.3109	2.88106	6.09109	0.93103
GTEX-PVOW-1026-SM-5NQ7M	Lung	7.82125	52.9515	3.6609	42.3297	17.6109	27.4113	5.92083	5.52089
GTEX-ZAJG-3026-SM-5HL92	Brain	11.3012	2.211	0.000999989	8.201	15.4111	0.600985	0.260996	0.0810019
GTEX-QDVJ-0826-SM-48U1S	Esophagus	12.0712	9.88129	0.210998	11.4613	19.3505	7.38092	0.710989	0.110998
GTEX-QEL4-0526-SM-3GIJ4	Blood Vessel	7.93098	28.9502	0.000999989	10.9011	26.0715	4.51085	0.910986	0.291002
GTEX-12WS9-0011-R10a-SM-57WBV	Brain	4.57097	3.26097	0.000999989	3.81108	5.32101	0.181005	0.121002	0.0810019
GTEX-T5JC-2426-SM-3NMDB	Brain	5.34096	3.17092	0.000999989	6.641	5.31106	0.761017	0.061002	0.201005
GTEX-ZVT3-0126-SM-5GU6I	Skin	11.2309	17.981	0.0909993	11.891	17.9511	21.5707	2.27096	0.580996
K-562-SM-5IJB7	Bone Marrow	15.6014	0.770999	0.0509985	4.6709	12.261	0.190994	0.0309997	0.491002
GTEX-11EQ8-0006-SM-5P9HJ	Blood	3.9411	0.901001	0.550991	11.5811	0.910986	2.25105	0.0410009	0.69102
GTEX-R55E-0006-SM-2TC5G	Blood	6.57094	5.72113	4.25099	18.081	8.30109	16.9006	0.38101	1.941
GTEX-145LS-0011-R8b-SM-5PNXA	Brain	3.95095	5.56083	0.0810019	6.7309	5.10107	2.40094	0.811015	0.0209995
GTEX-Y114-2126-SM-4TT8B	Skin	11.2808	2.38105	0.000999989	2.82099	13.1711	4.90108	0.561011	0.0810019
GTEX-ZVTK-0226-SM-51MRG	Skin	8.44092	10.831	0.150998	10.3611	13.101	23.0805	0.891002	0.891002
GTEX-PX3G-1526-SM-48U11	Stomach	3.6609	0.650987	0.160996	3.4011	4.12102	6.4509	0.541	0.0710018
GTEX-ZPU1-1226-SM-5HL71	Adipose Tissue	15.3015	12.5212	0.35099	12.8109	23.151	7.76077	7.27123	1.82096
GTEX-131YS-3026-SM-5EGHY	Brain	7.14087	0.590988	0.0309997	0.66099	15.6014	0.761017	0.201005	0.0410009
K-562-SM-5K7ZB	Bone Marrow	14.721	0.99103	0.000999989	5.25103	12.1906	0.190994	0.000999989	0.371002
GTEX-QXCU-0006-SM-2TC5K	Blood	8.23118	23.8514	1.72094	108.519	25.8304	33.57	0.260996	6.63088
GTEX-117YX-0626-SM-5EGJI	Heart	5.30113	4.07105	0.110998	4.62098	5.11098	3.07098	0.550991	0.0209995
GTEX-13PVQ-0011-R7a-SM-5L3G3	Brain	2.23101	3.80106	0.0509985	11.7208	5.91099	1.17097	0.171004	0.491002
GTEX-11XUK-0626-SM-5N9ES	Pancreas	3.18104	1.43098	0.0209995	1.99101	6.44107	2.88106	0.421002	0.0109996
GTEX-W5WG-0006-SM-3GIJT	Blood	22.3205	11.161	0.680987	59.2195	9.69069	42.2506	0.061002	1.33099
GTEX-11ZU8-2626-SM-5EQLL	Nerve	6.77115	15.2708	0.201005	23.6604	17.4312	9.61109	1.29101	0.190994
GTEX-ZPU1-0526-SM-4YCDA	Blood Vessel	11.2208	32.33	1.38099	17.7507	19.2315	13.091	2.70101	1.58096
GTEX-131XG-2526-SM-5HL7F	Nerve	12.301	11.5907	0.000999989	14.0812	18.4404	12.0211	0.861009	0.000999989
GTEX-1399R-1126-SM-5IFIO	Stomach	5.65098	1.40104	0.0710018	7.05086	5.98106	11.9414	0.650987	0.061002
GTEX-13OW6-0011-R1a-SM-5L3HQ	Brain	4.34092	1.33099	0.000999989	1.35097	4.29096	0.69102	0.260996	0.110998
GTEX-1497J-0126-SM-5Q5BK	Thyroid	10.481	13.6914	0.0810019	15.2011	15.5711	50.4017	1.92106	0.121002
GTEX-131XF-1226-SM-5HL8V	Stomach	6.84097	3.06099	0.150998	5.35097	10.3009	17.0914	1.15101	0.0710018
GTEX-12ZZY-2926-SM-5DUXO	Brain	8.25118	0.960994	0.0309997	0.69102	12.7013	1.06098	0.160996	0.0810019
GTEX-TSE9-0005-SM-4DXUF	Blood	3.50108	1.241	0.271007	8.85075	1.27103	6.6909	0.0109996	0.501006
GTEX-11P81-1126-SM-5GU5G	Colon	11.8507	11.6213	0.0209995	5.26086	15.661	3.93101	4.231	0.201005
GTEX-YJ8O-1826-SM-5HL82	Lung	6.84097	59.4127	2.60106	33.3011	12.8207	22.651	3.9611	0.600985
GTEX-WY7C-2626-SM-3NB2P	Nerve	12.0411	19.3117	0.141003	13.7914	17.7408	5.9311	2.49096	0.000999989
GTEX-14DAQ-1426-SM-5RQJD	Esophagus	10.7413	12.5507	0.150998	17.5208	14.0014	16.451	3.26097	0.0710018
GTEX-WYJK-1626-SM-3NM9J	Thyroid	9.01108	10.0708	0.110998	19.9304	16.771	23.2313	1.96101	0.0509985
GTEX-145ME-1926-SM-5SI9S	Adipose Tissue	10.5509	4.59097	0.000999989	13.1711	21.9113	8.61111	1.01101	0.0509985
GTEX-ZDXO-0011-R10a-SM-4WWD8	Brain	3.82113	2.67104	0.061002	1.78102	5.24085	0.590988	0.401007	0.0309997
GTEX-11GSP-1326-SM-5A5KY	Heart	1.50098	2.32093	0.0509985	17.8012	2.51107	1.85099	0.240999	4.44105
GTEX-13OW7-0011-R1b-SM-5L3HF	Brain	2.22099	2.9709	0.0509985	1.99101	2.26106	0.401007	0.251007	0.130996
GTEX-SIU8-0926-SM-2XCDO	Lung	3.80106	37.9808	0.891002	67.3824	8.82074	13.1912	0.910986	8.62127
GTEX-XV7Q-1326-SM-4BRWM	Stomach	8.18113	6.641	1.18099	18.7108	8.31087	45.2423	2.04103	0.311003
GTEX-11DXY-1326-SM-5987Z	Esophagus	7.59105	17.8816	0.000999989	12.2008	10.261	6.39082	2.9709	0.121002
GTEX-11DXX-0226-SM-5P9HL	Thyroid	10.2007	10.4208	0.0209995	11.291	17.2008	29.9317	1.551	0.0909993
GTEX-13X6J-3026-SM-5Q5CU	Brain	2.20106	3.10093	0.0710018	0.811015	3.38112	0.841013	0.190994	0.0410009
GTEX-XAJ8-0526-SM-47JYK	Small Intestine	13.4208	14.9907	0.980983	32.2516	19.2009	35.7606	2.211	2.09101
GTEX-Y9LG-0008-SM-4VBRJ	Skin	16.211	37.2611	0.000999989	6.01098	11.3711	5.51095	2.38105	0.0109996
GTEX-13FLV-1126-SM-5J2NO	Esophagus	5.84094	13.271	0.061002	22.0514	14.9907	12.6512	1.44103	0.35099
GTEX-147JS-2626-SM-5S2UX	Colon	6.84097	12.0813	0.000999989	9.37098	11.2613	3.69097	2.88106	0.291002
GTEX-ZV7C-0326-SM-57WB1	Heart	4.44105	2.07096	0.000999989	3.27093	4.59097	1.56103	0.300993	0.061002
GTEX-1269C-2526-SM-5EGJ3	Skin	10.4911	12.0612	0.0209995	4.9909	19.3612	14.3214	1.41098	0.621015
GTEX-12ZZZ-1326-SM-59HKW	Liver	0.69102	1.54104	0.371002	1.59096	2.65093	0.650987	0.271007	0.0309997
GTEX-12WSC-0005-SM-5MR3H	Blood	4.65087	11.4907	5.87097	25.8609	7.67092	26.5511	0.190994	12.4909
GTEX-12WSM-0008-SM-5S2VD	Skin	17.981	64.5704	0.000999989	10.7309	20.1206	14.091	6.17098	0.000999989
GTEX-ZEX8-2426-SM-4WKG4	Skin	11.7811	15.1905	0.201005	9.25094	17.4808	15.1411	1.16103	0.781003
GTEX-WYJK-1326-SM-3NB2T	Breast	10.7108	16.6413	0.0410009	14.1311	19.3505	26.7803	1.65095	0.181005
GTEX-11GS4-1026-SM-5N9DE	Adipose Tissue	4.82089	16.8013	0.451	41.081	11.561	14.2808	1.22103	0.491002
GTEX-WEY5-0008-SM-4LMKC	Skin	28.9602	50.5101	0.000999989	7.30103	22.1203	4.81088	9.73108	0.000999989
GTEX-14E7W-1226-SM-5RQIU	Heart	1.16103	1.59096	0.0410009	1.95098	1.86103	1.63105	0.190994	0.35099
GTEX-13S86-0326-SM-5SI6K	Heart	8.05118	6.9509	0.061002	6.68117	9.53082	4.69101	1.75103	0.240999
GTEX-O5YW-0006-SM-3LK6E	Blood	21.2413	5.23105	0.38101	20.2605	8.07073	18.8815	0.130996	0.441015
GTEX-11H98-0011-R8a-SM-5NQ8V	Brain	3.18104	1.54104	0.000999989	4.56116	3.63108	2.00097	0.901001	0.950989
GTEX-OHPJ-1326-SM-3MJHG	Esophagus	5.44111	6.76083	0.0710018	9.61109	18.681	4.49089	0.330999	0.121002
GTEX-XBEC-1326-SM-4AT69	Heart	1.06098	1.64103	0.0509985	2.88106	1.85099	2.31097	0.150998	0.0909993
GTEX-R3RS-1326-SM-48FE7	Esophagus	8.72104	7.82125	0.0810019	20.3704	11.9009	22.4805	2.11096	0.160996
GTEX-WHWD-0926-SM-4OORY	Esophagus	20.3407	15.7012	0.511002	32.4018	13.4506	15.6805	1.74098	1.49102
GTEX-12WSK-2226-SM-5GCO5	Breast	10.3209	14.7506	0.000999989	11.2511	16.631	10.4512	1.22103	0.0309997
GTEX-ZDXO-0011-R1a-SM-4WKF4	Brain	2.40094	3.10093	0.0509985	1.76101	3.35102	0.480997	0.390989	0.0410009
GTEX-111CU-1826-SM-5GZYN	Adipose Tissue	14.1409	12.4909	0.000999989	25.2918	16.3906	20.0913	1.83096	0.0309997
GTEX-11EMC-0926-SM-59863	Blood Vessel	7.52087	20.5904	0.0509985	22.231	6.99101	4.83093	0.701007	0.150998
GTEX-11ZVC-2926-SM-5986H	Blood Vessel	8.15113	14.2215	0.0309997	6.72111	11.0709	2.06094	1.31103	0.0309997
GTEX-T5JC-0011-R1A-SM-32PM6	Brain	2.70101	3.14095	0.000999989	8.94078	3.42096	0.980983	0.361007	0.181005
GTEX-YB5E-0526-SM-4VDSD	Pancreas	3.92094	2.51107	0.000999989	4.94099	9.45122	6.08096	1.03097	0.150998
GTEX-OXRK-1626-SM-3NB17	Stomach	3.4909	1.75103	0.130996	4.79091	6.201	6.48093	0.641002	0.061002
GTEX-RU72-0326-SM-2TF5T	Heart	3.22098	5.45092	0.231006	5.08096	5.48085	2.44105	0.730978	1.941
GTEX-Q2AH-0926-SM-48TZK	Pancreas	5.91099	3.58109	0.141003	9.77096	10.5407	6.6909	1.33099	0.710989
GTEX-13QJC-0011-R8b-SM-5S2U6	Brain	1.61105	0.970971	0.000999989	1.29101	2.49096	1.05103	0.300993	0.000999989
GTEX-ZV68-0011-R10a-SM-51MT7	Brain	1.70102	4.93107	0.000999989	1.92106	2.45105	0.210998	0.181005	0.0109996
GTEX-147F4-0011-R8b-SM-5S2UN	Brain	2.99094	3.27093	0.000999989	1.39098	6.14111	0.210998	0.220997	0.0309997
GTEX-Y8E4-1326-SM-5IFIY	Pancreas	2.40094	1.03097	0.0410009	4.9909	4.2009	3.09106	0.830988	0.0810019
GTEX-13OW6-1826-SM-5N9F9	Kidney	3.4909	2.56099	0.171004	4.44105	3.83094	1.76101	1.01101	0.550991
GTEX-1128S-2826-SM-5N9DI	Brain	7.33095	1.22103	0.0309997	2.211	8.15113	0.941022	0.160996	0.150998
GTEX-111FC-3326-SM-5GZYV	Brain	8.43098	0.950989	0.000999989	1.941	11.2511	0.891002	0.210998	0.110998
GTEX-139UC-0005-SM-5PNU7	Blood	2.06094	1.15101	1.16103	11.051	1.35097	6.18083	0.0410009	5.35097
GTEX-139UC-3126-SM-5J1OY	Brain	2.78099	2.40094	0.0810019	1.99101	4.54097	0.821026	0.150998	0.0410009
GTEX-RVPU-2326-SM-2TF6R	Adipose Tissue	7.11123	16.8211	0.0509985	24.2112	22.1618	20.2114	1.54104	0.181005
GTEX-VUSG-0326-SM-3GIJ7	Pancreas	1.07103	4.22104	0.150998	4.58112	5.49112	5.59098	2.42099	0.000999989
GTEX-12WSH-3026-SM-5CVNI	Brain	3.59104	2.14102	0.000999989	6.57094	4.45091	0.600985	0.201005	0.0509985
GTEX-11P82-1726-SM-5Q5AT	Adipose Tissue	10.6908	7.39116	0.0209995	14.941	14.2511	10.0109	0.721014	0.0909993
GTEX-12584-0005-SM-5N9GM	Blood	0.93103	2.64103	1.37097	7.05086	1.30098	4.0609	0.150998	1.31103
GTEX-T6MN-1126-SM-4DM71	Blood Vessel	10.1408	17.1508	0.35099	14.191	8.21124	4.63092	1.28103	0.801014
GTEX-X15G-2126-SM-4PQZR	Salivary Gland	11.831	9.13117	0.201005	15.1306	12.6407	17.1615	2.67104	0.330999
GTEX-RU72-2226-SM-46MUE	Ovary	6.30108	37.5203	0.0209995	1.75103	9.23108	1.01101	1.96101	0.0909993
GTEX-Y8LW-0002-SM-4V6G2	Blood	14.6507	88.4016	0.000999989	8.201	4.24099	12.2109	0.0209995	130.68
GTEX-ZAB4-1426-SM-5CVN6	Adipose Tissue	7.17113	58.5907	1.18099	26.211	8.41113	14.451	3.32096	4.4309
GTEX-X4EO-0126-SM-3P5YN	Nerve	7.06113	10.341	0.121002	14.811	16.3113	8.0111	0.790973	0.260996
GTEX-13X6J-0011-R7b-SM-5PNUC	Brain	3.3311	2.60106	0.0710018	1.551	2.55107	0.390989	0.210998	0.0410009
GTEX-11P81-2726-SM-59876	Blood Vessel	8.42105	17.4808	0.000999989	4.08094	11.0609	3.87098	2.07096	0.0309997
GTEX-14BIM-0326-SM-5SI9B	Muscle	2.75108	1.42099	0.0209995	2.31097	5.22091	1.40104	0.171004	0.000999989
GTEX-131XF-1026-SM-5BC6A	Lung	10.9412	18.8606	0.181005	20.3309	22.2402	17.811	3.45097	0.511002
GTEX-11EM3-1026-SM-5A5KL	Stomach	2.49096	2.41095	0.0410009	4.61106	9.7412	11.831	0.550991	0.0710018
GTEX-P4PQ-1526-SM-3NMCK	Stomach	10.9914	13.3707	0.0209995	8.25118	16.9111	6.75099	1.801	0.870973
GTEX-TSE9-1226-SM-4DXTM	Esophagus	12.6608	17.6305	0.181005	20.8417	11.0909	22.5914	4.13103	0.34099
GTEX-Z9EW-0526-SM-5HL8S	Esophagus	12.6512	11.5811	0.121002	14.2412	12.6608	14.401	4.16091	0.361007
GTEX-X3Y1-0008-SM-4PR12	Skin	19.8408	50.4821	0.000999989	6.97117	16.3815	8.71077	4.95093	0.000999989
GTEX-OOBJ-1526-SM-3NB1Q	Stomach	6.47105	3.77088	0.431012	12.3908	9.75134	19.5704	1.67099	0.0810019
GTEX-OXRP-0126-SM-48TDI	Skin	14.421	17.3805	0.000999989	10.7212	17.1805	12.8812	1.471	0.671007
GTEX-111VG-1926-SM-5GIDO	Testis	7.07093	7.05086	0.141003	1.20097	4.35086	1.20097	4.26102	0.0410009
GTEX-13O3Q-0326-SM-5L3FE	Heart	6.63088	16.1314	0.390989	23.8911	8.77075	6.15091	0.680987	0.38101
GTEX-ZXG5-0926-SM-5NQ8H	Thyroid	7.16119	11.2707	0.160996	20.3013	13.4814	22.5007	1.31103	0.38101
GTEX-12696-3026-SM-5FQTU	Brain	1.93094	1.69103	0.000999989	7.79095	7.72107	1.35097	0.150998	0.841013
GTEX-RWS6-1726-SM-47JXP	Vagina	10.6612	15.7208	0.150998	16.0912	14.9306	12.961	2.841	0.000999989
GTEX-PWO3-1526-SM-48TCM	Skin	9.65114	10.9314	0.000999989	10.4208	15.2909	14.9513	0.610981	0.93103
K-562-SM-5O9BA	Bone Marrow	15.6208	0.621015	0.000999989	4.30108	13.1811	0.201005	0.000999989	0.421002
GTEX-13S86-0005-SM-5NQ7I	Blood	24.361	3.60101	0.600985	28.3819	6.02099	15.9005	0.061002	4.16091
GTEX-POYW-0526-SM-5KM2H	Muscle	4.91094	2.69092	0.000999989	5.69107	8.73072	2.26106	0.401007	0.0410009
GTEX-ZQG8-1526-SM-5HL65	Adipose Tissue	11.041	2.58095	0.000999989	18.8514	13.7914	10.751	0.761017	0.100998
GTEX-ZC5H-0526-SM-5HL9E	Nerve	7.69115	22.4011	0.271007	17.8915	13.2214	8.36114	2.07096	0.061002
GTEX-ZDXO-0011-R5a-SM-4WKG5	Brain	3.611	5.55082	0.0410009	1.81102	3.93101	0.781003	0.801014	0.0109996
GTEX-145LU-0011-R11b-SM-5P9JX	Brain	5.44111	0.650987	0.000999989	0.390989	9.55132	0.740977	0.171004	0.0309997
GTEX-13RTJ-0011-R8b-SM-5O9DL	Brain	4.25099	0.901001	0.000999989	2.51107	6.27102	1.551	0.521016	0.0209995
GTEX-WQUQ-0006-SM-3MJF4	Blood	13.1912	18.6009	8.72104	47.9215	10.6206	33.9114	0.110998	4.74103
GTEX-X638-0126-SM-47JZ8	Skin	7.42093	16.8211	0.330999	9.68129	18.7212	14.721	1.68098	3.24091
GTEX-ZVT3-0011-R11b-SM-57WBI	Brain	4.28086	0.401007	0.0309997	0.790973	7.4009	0.511002	0.100998	0.150998
GTEX-ZT9X-0526-SM-5GCOP	Esophagus	17.0914	21.6516	1.70102	25.7108	16.5505	19.001	10.2411	1.73099
GTEX-QLQW-1426-SM-2S1QU	Nerve	7.41116	13.3707	0.000999989	19.8408	16.4715	9.69069	2.25105	0.110998
GTEX-X4EP-0726-SM-3P5YJ	Nerve	7.14087	20.6004	0.0909993	33.0116	21.4217	10.8611	0.600985	0.100998
GTEX-139T4-0008-SM-5S2WF	Skin	17.8407	41.6401	0.0209995	11.7411	13.131	1.131	4.27108	0.0410009
GTEX-ZA64-1426-SM-5CVMC	Colon	6.3612	8.83114	0.000999989	6.71087	18.5404	3.70096	1.38099	0.390989
GTEX-11P81-0326-SM-5HL6B	Blood Vessel	14.7312	15.0605	0.150998	6.89094	12.4606	2.07096	1.76101	0.0710018
GTEX-NL3H-0011-R1a-SM-48TDJ	Brain	1.67099	0.921017	0.0410009	3.9109	1.46104	0.511002	0.110998	0.000999989
GTEX-X4EP-0011-R5A-SM-3P628	Brain	15.071	95.8629	0.451	34.6913	9.20106	3.78108	6.77115	0.590988
GTEX-ZVT3-2126-SM-59HL2	Stomach	5.32101	6.06119	0.501006	20.8316	10.3812	17.7408	1.92106	2.39098
GTEX-P78B-1626-SM-5SI85	Muscle	4.97088	1.63105	0.000999989	0.850982	5.69107	0.650987	0.181005	0.0509985
GTEX-11NUK-1226-SM-5P9GM	Liver	2.76102	4.34092	0.34099	3.15098	8.08081	1.33099	0.99103	0.231006
GTEX-11VI4-0006-SM-5N9D8	Blood	18.2712	8.62127	0.35099	23.1911	7.17113	15.5808	0.0209995	0.93103
GTEX-147GR-0011-R4a-SM-5S2V2	Brain	2.22099	1.44103	0.000999989	0.901001	1.17097	0.35099	0.600985	0.000999989
GTEX-T8EM-0826-SM-4DM76	Pancreas	2.741	1.59096	0.110998	3.45097	7.09105	8.0211	1.10099	0.130996
GTEX-T5JC-0011-R11A-SM-32PMB	Brain	5.83082	1.08103	0.000999989	4.12102	12.4813	2.06094	0.181005	0.160996
GTEX-12C56-1226-SM-5FQSU	Esophagus	11.7713	9.89089	0.260996	14.7006	11.8212	12.5012	4.12102	1.60103
GTEX-ZDXO-3126-SM-5IJDF	Skin	6.40101	15.1506	0.150998	11.1409	15.2412	12.9511	0.730978	15.4111
GTEX-U412-0526-SM-3DB9I	Adipose Tissue	3.83094	14.3413	0.000999989	12.7807	14.5505	12.8607	1.43098	0.0710018
GTEX-139UC-2926-SM-5J1N6	Muscle	4.26102	1.11103	0.000999989	2.96103	3.22098	0.841013	0.220997	0.0410009
GTEX-S4UY-1326-SM-4AD4X	Vagina	11.9712	26.3111	0.141003	11.0211	16.2515	4.80088	0.880992	0.181005
GTEX-131YS-0426-SM-5EQ4J	Blood Vessel	6.38108	22.9512	0.061002	12.5507	12.471	2.77099	2.55107	0.061002
GTEX-11TT1-0004-SM-5S2NT	Blood	16.8013	75.1604	0.000999989	6.76083	3.10093	7.1211	0.0410009	26.0516
GTEX-14BMU-1826-SM-5RQII	Uterus	22.3314	14.7006	0.240999	10.2809	17.561	6.31114	2.31097	0.610981
GTEX-XBEW-0626-SM-4QASP	Skin	12.5908	3.17092	0.061002	3.63108	19.5907	13.9714	0.850982	0.160996
GTEX-111VG-0326-SM-5GZX7	Heart	2.31097	8.85075	0.210998	5.43093	3.4011	3.29094	0.680987	0.190994
GTEX-X5EB-0008-SM-46MU3	Skin	16.631	51.9013	0.000999989	10.3309	17.9611	12.3711	7.66083	0.0410009
GTEX-XV7Q-2926-SM-4BRUL	Muscle	3.82113	3.97099	0.0710018	3.98091	8.39075	1.57102	0.371002	0.000999989
GTEX-11GS4-3026-SM-5A5LG	Pituitary	6.11096	3.22098	0.110998	3.53106	10.8611	1.93094	0.160996	0.061002
GTEX-ZF3C-2026-SM-4WWB5	Pancreas	1.511	6.58097	0.0909993	16.7107	5.74099	9.1413	1.96101	0.141003
GTEX-12ZZY-0011-R10b-SM-5HL7W	Brain	5.31106	3.03101	0.000999989	0.600985	2.01098	0.401007	0.280992	0.141003
GTEX-13OW7-2926-SM-5MR3Z	Brain	6.57094	0.880992	0.000999989	0.950989	12.1106	0.751008	0.141003	0.061002
GTEX-11WQC-2626-SM-5CVLF	Muscle	3.05104	2.40094	0.0209995	1.86103	4.13103	1.511	0.160996	0.0509985
GTEX-WHPG-1426-SM-3NMBB	Lung	12.3112	31.801	1.43098	48.6511	28.3918	22.6211	5.55082	3.31108
GTEX-T6MO-0126-SM-4DM6X	Adrenal Gland	15.4807	38.2901	0.280992	8.78109	11.2107	2.94099	2.9011	0.841013
GTEX-XBEC-0526-SM-4QARU	Blood Vessel	8.21124	16.7815	0.0710018	9.36124	20.9314	2.91097	1.131	0.110998
GTEX-ZAB4-2926-SM-57WCV	Brain	6.63088	1.08103	0.000999989	1.41098	9.31077	1.68098	0.160996	0.0309997
GTEX-13NYS-0011-R5a-SM-5MR4D	Brain	7.14087	10.8709	0.0209995	5.73105	4.63092	0.38101	0.251007	0.000999989
GTEX-14DAQ-1826-SM-5S2VV	Adrenal Gland	5.92083	17.4312	0.110998	7.32079	9.89089	1.95098	1.46104	1.211
GTEX-ZVT4-0008-SM-57WCA	Skin	16.7408	35.9919	0.000999989	11.561	12.1712	3.29094	2.51107	0.0209995
GTEX-T6MO-1426-SM-4DM73	Cervix Uteri	14.411	26.8007	0.190994	18.841	13.2811	19.001	1.97096	0.0410009
GTEX-146FQ-1226-SM-5QGQ4	Esophagus	7.78124	3.081	0.100998	7.78124	7.43122	10.9609	1.85099	0.0810019
GTEX-TKQ2-0004-SM-3NMAC	Blood	17.1508	54.6709	0.000999989	8.0111	3.79106	6.26103	0.0209995	100.573
GTEX-13NZB-0626-SM-5IFH6	Liver	2.9709	2.92108	0.0810019	3.4011	8.41113	0.781003	0.38101	0.0410009
GTEX-12WSH-0005-SM-5NQ9P	Blood	3.98091	25.0216	4.54097	122.048	7.52087	12.3112	0.311003	10.1711
GTEX-13O21-2926-SM-5J1OU	Blood Vessel	10.1008	28.6607	0.130996	13.2912	9.98111	11.8507	2.66106	0.460988
GTEX-X5EB-2026-SM-4E3KA	Testis	6.27102	7.15078	0.0209995	2.25105	5.66117	2.741	3.00091	0.0810019
GTEX-11P7K-0426-SM-5BC5H	Spleen	14.431	11.7208	2.55107	50.7593	19.8807	33.3312	1.08103	8.201
GTEX-11EM3-1326-SM-5N9C6	Breast	15.1306	24.9506	0.0909993	11.6511	14.3115	13.7009	2.66106	2.49096
GTEX-YJ8O-2526-SM-5HL85	Skin	8.33106	22.991	0.201005	6.34095	14.421	14.0607	1.43098	1.20097
GTEX-OHPN-0011-R9A-SM-2YUMN	Brain	4.30108	3.54111	0.181005	8.19077	6.67099	4.79091	2.20106	0.531006
GTEX-ZTSS-0726-SM-51MSN	Esophagus	12.5412	12.9807	0.0410009	4.26102	16.4715	3.69097	1.44103	0.231006
GTEX-11UD1-0011-R3a-SM-5BC6S	Brain	2.44105	3.50108	0.0410009	0.421002	3.60101	0.34099	0.421002	0.000999989
GTEX-XUZC-0926-SM-4BOQF	Uterus	14.3214	25.6716	0.330999	14.7813	20.3817	15.6512	1.38099	0.130996
GTEX-Y9LG-0226-SM-4VBS4	Blood Vessel	10.7108	13.6611	0.330999	14.6507	21.0012	9.23108	0.811015	0.650987
GTEX-ZF2S-0426-SM-4WKGP	Pancreas	1.97096	0.701007	0.0309997	2.78099	2.89106	2.19102	1.16103	0.0209995
GTEX-X585-1426-SM-4E3JO	Esophagus	10.061	19.4204	0.061002	26.9703	16.9205	23.4806	4.16091	0.061002
GTEX-X4EP-0011-R11B-SM-4QASK	Brain	8.06123	6.99101	0.0410009	3.3311	11.6012	0.171004	0.231006	0.0509985
GTEX-11DXX-0526-SM-5PNVR	Heart	4.86116	4.59097	0.000999989	4.03089	4.98088	1.53103	0.970971	0.231006
GTEX-13NZ8-2126-SM-5L3EO	Muscle	2.55107	2.03101	0.000999989	2.77099	6.99101	2.48096	0.171004	0.150998
GTEX-RU72-2926-SM-2TF66	Brain	7.93098	2.72093	0.110998	3.60101	12.1906	1.22103	0.701007	0.0909993
GTEX-RM2N-1726-SM-2TF55	Adipose Tissue	9.00109	14.3711	0.000999989	36.3706	27.2012	30.2906	2.86096	0.000999989
GTEX-ZTSS-1026-SM-5985N	Adipose Tissue	8.11111	9.18131	0.0710018	55.2729	29.3218	13.6706	1.54104	0.521016
GTEX-11VI4-1126-SM-5EQMD	Skin	8.84094	12.5108	0.000999989	6.94079	22.4105	16.5115	0.821026	0.701007
GTEX-12WSJ-0126-SM-5GCOM	Adrenal Gland	13.0114	41.3324	0.0810019	10.7012	11.1209	4.58112	5.31106	0.801014
GTEX-11TT1-1126-SM-5P9GV	Thyroid	13.4013	11.2613	0.0909993	9.02108	14.5606	19.411	2.30106	0.210998
GTEX-12WSD-0926-SM-5GCNL	Thyroid	5.49112	20.2704	0.300993	15.0605	17.9511	45.3805	2.73094	0.271007
GTEX-RUSQ-2126-SM-47JXK	Testis	8.18113	6.65113	0.0509985	4.41098	9.64112	6.47105	3.21095	0.361007
GTEX-145MF-2726-SM-5O995	Brain	5.08096	1.86103	0.0209995	1.10099	4.98088	0.600985	0.130996	0.100998
GTEX-XXEK-0005-SM-4BRWJ	Blood	15.4614	5.26086	0.811015	24.4405	3.611	15.0105	0.100998	3.16104
GTEX-YECK-2826-SM-5IFHF	Colon	4.63092	10.0012	0.0509985	16.8013	14.3006	8.64101	2.50099	0.371002
GTEX-QDVJ-0726-SM-48U1W	Esophagus	14.3313	8.86119	0.201005	11.2613	11.9812	9.64112	2.71095	1.16103
K-562-SM-5K7TT	Bone Marrow	14.7608	0.571015	0.0810019	4.48094	12.6714	0.311003	0.061002	0.610981
GTEX-OOBK-0126-SM-2YUND	Skin	8.93087	17.5306	0.0909993	14.1105	18.5906	14.1615	0.671007	0.130996
GTEX-ZEX8-0826-SM-4WKHK	Liver	5.64119	5.64119	0.181005	2.96103	11.6714	1.33099	1.69103	0.451
GTEX-13FH7-1226-SM-5IJFK	Small Intestine	13.2214	11.8507	0.531006	24.1207	22.0805	40.7407	2.78099	4.14106
GTEX-147JS-2526-SM-5S2Q8	Colon	5.47098	17.3108	0.390989	22.0606	10.431	10.6413	1.56103	0.870973
GTEX-NPJ8-2226-SM-3TW8D	Kidney	3.32096	3.39097	0.300993	8.92097	4.62098	3.081	0.441015	0.621015
GTEX-SUCS-0926-SM-4DM4Z	Stomach	3.17092	1.34099	0.0509985	4.52087	6.63088	6.90097	0.311003	0.220997
GTEX-UPK5-0326-SM-3GAF3	Heart	4.49089	5.70094	0.000999989	5.86081	5.61116	2.99094	0.751008	1.66106
GTEX-ZP4G-1326-SM-5EGIW	Adipose Tissue	6.99101	9.50114	0.0209995	13.0213	14.601	7.44102	1.59096	0.110998
GTEX-OXRL-0326-SM-2I3F2	Heart	3.86107	1.20097	0.0410009	1.801	3.23104	2.18102	0.121002	0.130996
GTEX-XMK1-2426-SM-4B66I	Nerve	8.29074	21.8112	0.181005	19.701	17.6109	12.5507	1.92106	0.061002
GTEX-ZYFC-0426-SM-5GICQ	Skin	12.6214	13.6914	0.141003	8.29074	18.2915	16.8713	1.81102	4.19102
GTEX-XV7Q-0126-SM-4BRVK	Spleen	15.8807	14.1615	1.95098	43.3722	9.71087	18.6112	1.99101	2.96103
GTEX-XBED-2226-SM-47JYQ	Skin	14.5808	8.31087	0.0309997	8.96125	21.5916	12.6214	1.06098	0.740977
GTEX-14A6H-2626-SM-5NQBO	Nerve	8.03111	16.1213	0.280992	17.5707	16.9205	16.5505	1.22103	0.181005
GTEX-12WSK-2126-SM-5CVNC	Skin	7.2511	14.9213	0.000999989	5.16118	25.7804	5.05111	0.841013	1.471
GTEX-YF7O-1326-SM-4W1ZR	Pancreas	2.48096	1.01101	0.121002	4.4611	4.36112	3.97099	0.630995	0.0209995
GTEX-13FXS-3026-SM-5LZYO	Brain	8.46083	0.721014	0.000999989	1.04102	11.3609	0.710989	0.441015	0.0410009
GTEX-12WSL-2326-SM-5DUXQ	Testis	4.91094	5.95087	0.061002	2.55107	6.38108	4.47101	6.10081	0.0710018
GTEX-11OC5-0526-SM-5N9EE	Nerve	10.4512	11.161	0.110998	15.2708	18.2813	10.2007	1.03097	0.0710018
GTEX-PLZ5-1626-SM-3NB21	Nerve	9.12105	13.3707	0.0410009	18.0509	17.0713	9.77096	1.85099	0.150998
GTEX-13RTK-0326-SM-5RQHS	Thyroid	9.3308	7.41116	0.061002	8.88086	19.6111	25.6716	2.06094	0.0309997
GTEX-13OW6-0826-SM-5L3GA	Lung	10.7212	51.8798	0.621015	34.0221	23.4806	15.6805	3.87098	3.15098
GTEX-YJ8O-2726-SM-5IFJ7	Blood Vessel	9.61109	27.5217	0.0810019	7.9211	14.6609	5.78092	2.34096	0.0909993
GTEX-13X6H-0526-SM-5LU4Q	Thyroid	12.3711	11.6213	0.181005	9.88129	22.7517	14.8707	1.77104	0.231006
GTEX-11EQ9-1426-SM-5987G	Colon	11.1711	13.3207	0.000999989	13.5414	22.7217	8.78109	1.25102	0.501006
GTEX-Z93S-2626-SM-57WBX	Colon	7.19104	7.68103	0.0810019	9.67123	13.3707	7.33095	2.00097	0.160996
GTEX-11XUK-2226-SM-5CVLL	Muscle	3.51104	1.74098	0.000999989	2.00097	4.29096	1.72094	0.210998	0.000999989
GTEX-ZVT4-1026-SM-57WC4	Breast	8.30109	22.5413	0.000999989	18.4008	16.4806	12.1906	2.66106	0.141003
GTEX-XYKS-0926-SM-4BRVG	Adrenal Gland	14.811	32.9019	0.100998	6.74117	9.86077	1.56103	4.31093	0.491002
GTEX-14BIM-3226-SM-5RQIQ	Pituitary	7.39116	9.12105	0.0309997	7.93098	10.7913	3.50108	0.641002	1.74098
GTEX-ZYFG-0126-SM-5GIDH	Blood Vessel	9.43093	19.5609	0.0710018	7.9508	15.9812	4.45091	1.35097	0.141003
GTEX-111CU-1726-SM-5EGHM	Testis	9.62109	5.49112	0.0309997	1.881	6.58097	3.78108	3.44093	0.0309997
GTEX-132QS-0126-SM-5IFH9	Adrenal Gland	10.9314	31.9911	0.0710018	4.16091	7.96073	2.83098	3.37105	0.231006
GTEX-145LT-0326-SM-5LUAD	Lung	14.5113	29.6508	0.201005	19.2115	16.5907	11.8811	6.58097	0.621015
GTEX-X15G-1326-SM-4PQZJ	Colon	13.7609	12.6013	0.710989	13.6914	13.6006	34.8213	2.51107	0.580996
GTEX-144GM-0826-SM-5O98R	Prostate	3.41101	12.8411	0.401007	14.3413	17.6611	4.53091	0.650987	0.121002
GTEX-12WSK-0826-SM-5CVNP	Lung	8.28097	26.9217	0.231006	30.7518	23.5703	20.9808	1.66106	0.160996
GTEX-13NZ9-0726-SM-5J1ME	Nerve	10.131	17.8915	0.150998	19.5013	19.7516	15.5108	2.60106	0.141003
GTEX-11ZUS-1826-SM-5FQTR	Adipose Tissue	5.16118	29.8715	0.190994	14.8408	8.34088	9.48074	3.67107	2.14102
GTEX-13QIC-1826-SM-5J1MY	Vagina	4.98088	46.2314	0.141003	29.6015	11.3609	14.051	1.551	0.260996
GTEX-11WQC-2526-SM-5CVLE	Skin	7.7109	11.2208	0.0810019	6.85093	17.561	8.85075	0.790973	1.03097
GTEX-WXYG-1226-SM-4ONCJ	Esophagus	14.7312	8.68123	0.121002	17.7716	14.4811	15.1212	4.24099	0.710989
GTEX-WY7C-1326-SM-4ONCX	Esophagus	12.7312	7.27123	0.061002	7.10089	16.451	5.72113	1.69103	0.061002
GTEX-13SLX-0011-R10a-SM-5P9HV	Brain	4.231	2.04103	0.000999989	2.86096	4.86116	0.361007	0.061002	0.130996
GTEX-1399R-2326-SM-5PNYT	Blood Vessel	5.6209	8.24089	0.0209995	4.05106	6.32121	1.45095	1.131	0.000999989
GTEX-ZAB4-2226-SM-5HL97	Colon	7.26116	10.7012	0.941022	30.55	9.77096	21.6006	1.92106	3.00091
GTEX-WYVS-1526-SM-4OND4	Ovary	8.31087	45.7215	0.110998	6.56093	9.06119	3.34105	2.35104	0.160996
GTEX-V1D1-1726-SM-4JBHB	Stomach	4.48094	3.45097	0.781003	6.29105	8.9012	14.8305	1.22103	0.150998
GTEX-SE5C-1026-SM-4BRUG	Bladder	14.8614	7.15078	0.000999989	3.88092	12.7312	2.52101	1.31103	0.330999
GTEX-12696-1226-SM-5FQSM	Heart	3.89089	9.01108	0.0309997	4.60085	4.19102	2.161	0.521016	0.0309997
GTEX-14C38-0726-SM-5SI6M	Skin	10.5013	15.9911	0.0209995	9.88129	18.5507	16.5815	1.78102	1.66106
GTEX-117XS-0526-SM-5987Q	Thyroid	5.3811	35.0101	0.280992	8.97119	11.4613	21.3003	1.95098	0.201005
GTEX-13PVR-1426-SM-5S2PW	Vagina	16.0711	16.631	0.32099	20.8909	19.7804	19.8312	4.56116	0.361007
GTEX-XUW1-1826-SM-4BOQD	Colon	11.6012	6.57094	0.000999989	5.58091	17.3312	5.64119	1.54104	0.0909993
GTEX-XYKS-2526-SM-4BOPX	Nerve	9.55132	20.7408	0.0710018	21.8007	13.8614	7.19104	0.790973	0.0410009
GTEX-ZVE1-0726-SM-51MRN	Skin	5.54082	17.6513	0.000999989	7.57108	8.6512	7.38092	0.35099	3.34105
GTEX-YEC3-1726-SM-5IFIK	Testis	6.51109	4.96089	0.0410009	1.12101	4.66087	1.52098	4.94099	0.0509985
GTEX-12WSG-0005-SM-5NQA2	Blood	14.4811	3.46103	1.41098	11.1409	2.87109	6.27102	0.061002	0.401007
GTEX-RU72-0011-R6A-SM-2TF71	Brain	3.88092	4.27108	0.100998	2.32093	4.62098	0.260996	0.480997	0.100998
GTEX-Y8LW-0126-SM-4VBS1	Spleen	9.83074	13.9414	1.49102	75.9196	16.1908	38.2318	0.550991	1.22103
GTEX-QDVN-0526-SM-48TZ4	Spleen	10.7108	8.55104	1.42099	40.2914	15.6707	28.0903	0.761017	2.18102
GTEX-ZVZP-2526-SM-57WBR	Muscle	5.02109	1.19102	0.000999989	2.31097	8.04114	2.00097	0.110998	0.0410009
GTEX-14C39-1726-SM-5RQIL	Skin	5.56083	11.3609	0.000999989	3.32096	17.2115	10.2411	0.980983	0.361007
GTEX-RU72-0626-SM-46MUI	Breast	6.34095	40.002	0.571015	18.7706	17.3012	15.9812	2.60106	1.241
GTEX-146FR-0126-SM-5Q5F3	Pancreas	2.78099	1.89094	0.0509985	3.67107	5.76092	3.23104	2.24093	0.061002
GTEX-11DZ1-0426-SM-5H11A	Lung	10.0408	39.2304	0.35099	35.1122	9.49126	13.7409	3.27093	0.511002
GTEX-ZE9C-0011-R5a-SM-5EGLO	Brain	4.02113	7.3712	0.0909993	2.68105	4.42108	0.441015	0.361007	0.251007
GTEX-XUW1-1526-SM-4BOOY	Esophagus	12.0011	12.961	0.0309997	5.43093	17.9511	6.43081	1.18099	0.201005
GTEX-145ME-1126-SM-5SIAT	Colon	9.98111	7.90081	0.0209995	7.81096	26.6304	4.19102	1.76101	0.680987
GTEX-PLZ4-0226-SM-5SI7M	Adipose Tissue	9.77096	11.3012	0.0209995	28.0417	14.5505	18.5816	2.73094	0.100998
GTEX-12WSH-1526-SM-5BC5W	Skin	8.22092	14.5314	0.000999989	5.71083	18.7316	6.2208	0.801014	0.710989
GTEX-ZYT6-0526-SM-5GIEA	Lung	8.21124	30.0814	2.211	34.9108	14.881	28.2308	5.11098	9.5712
GTEX-1314G-2026-SM-5LZUM	Salivary Gland	11.2613	9.3211	0.181005	20.9707	13.5414	22.4711	4.21111	0.121002
GTEX-WHSE-0626-SM-4RGNF	Thyroid	6.23116	8.46083	0.0810019	13.9211	14.441	25.3304	0.531006	0.160996
GTEX-13FXS-0226-SM-5IJCK	Skin	14.671	4.19102	0.0209995	2.86096	15.3812	8.91108	0.821026	0.511002
GTEX-Z93S-0011-R10a-SM-4RGNM	Brain	3.97099	0.880992	0.0209995	0.641002	3.82113	0.210998	0.201005	0.000999989
GTEX-13X6J-0011-R8b-SM-5PNUA	Brain	2.95099	1.48103	0.0410009	1.60103	2.76102	0.941022	0.471	0.000999989
GTEX-ZVZP-0226-SM-5NQ73	Heart	3.9611	3.17092	0.000999989	2.52101	3.57093	1.85099	0.35099	0.231006
GTEX-ZVE2-0426-SM-59HJ7	Nerve	8.32125	22.7107	0.000999989	17.3012	17.1615	12.3206	1.801	0.000999989
GTEX-12ZZX-0011-R10b-SM-5DUWK	Brain	7.0109	3.3311	0.0309997	0.460988	4.49089	0.501006	0.361007	0.000999989
GTEX-117YX-1926-SM-5GIEC	Skin	5.44111	6.41078	0.0209995	4.53091	18.1815	6.07086	1.07103	0.0509985
GTEX-WH7G-1726-SM-4LVKY	Prostate	7.33095	17.9312	0.061002	8.41113	15.5409	4.05106	1.50098	0.181005
GTEX-ZF3C-0326-SM-4WWBF	Muscle	4.85106	2.46092	0.0509985	3.14095	3.12098	1.18099	0.061002	0.0410009
GTEX-139TS-0126-SM-5K7XJ	Thyroid	10.5407	22.6117	0.401007	15.4711	11.8408	29.3808	2.28105	0.610981
GTEX-13D11-2126-SM-5IFH2	Stomach	6.38108	2.48096	0.491002	9.98111	8.33106	14.1213	1.141	0.410997
GTEX-Q2AG-0326-SM-48U1O	Breast	9.07124	38.2822	0.361007	14.2907	17.171	16.1706	2.161	2.37101
GTEX-12696-0626-SM-5EGGD	Adrenal Gland	15.1611	19.1305	0.0309997	8.40123	11.2707	2.60106	1.52098	0.580996
GTEX-QESD-0008-SM-447B2	Skin	26.251	58.8798	0.061002	8.13082	24.0606	16.2009	7.29092	0.100998
GTEX-13RTJ-0626-SM-5S2NB	Blood Vessel	4.21111	17.8209	0.000999989	13.6507	6.00099	4.60085	0.311003	0.311003
GTEX-S33H-2226-SM-5S2UF	Muscle	4.30108	1.19102	0.0309997	1.49102	3.42096	1.33099	0.361007	0.061002
GTEX-12584-2126-SM-5FQUM	Adipose Tissue	5.95087	13.4609	0.201005	44.6813	10.6812	14.4911	1.90105	0.291002
GTEX-XQ8I-2426-SM-4WAXY	Breast	8.14097	6.60107	0.000999989	18.2712	17.2306	23.7705	1.08103	0.061002
GTEX-11TT1-1726-SM-5EQLJ	Liver	18.9812	9.8512	0.0509985	8.29074	12.0712	1.58096	0.650987	0.291002
GTEX-11NSD-1826-SM-5N9CF	Nerve	14.7006	17.7716	0.0710018	12.6407	21.6111	12.2814	1.25102	0.240999
GTEX-13X6I-0011-R1b-SM-5PNZC	Brain	3.4909	1.801	0.0209995	3.26097	2.75108	0.880992	0.561011	0.000999989
GTEX-N7MT-1626-SM-3LK71	Pancreas	2.79103	3.34105	0.130996	20.4312	11.4312	14.771	1.31103	0.110998
GTEX-WYVS-1926-SM-4PQZ2	Liver	5.18089	6.57094	0.740977	4.97088	9.31077	2.81103	1.42099	0.291002
GTEX-WHSE-0011-R4A-SM-3P5ZN	Brain	7.60106	10.4208	0.0410009	6.00099	6.83102	1.00097	0.491002	0.0410009
K-562-SM-2S1RI	Bone Marrow	13.4609	1.66106	0.150998	4.58112	14.7006	0.260996	0.0410009	1.15101
GTEX-12WSK-1326-SM-5CVNM	Esophagus	7.30103	9.49126	0.000999989	5.92083	15.3514	3.21095	0.821026	0.181005
GTEX-13NZA-1426-SM-5KM4Y	Lung	10.751	14.1311	1.60103	63.1101	17.3805	24.191	2.30106	8.6608
GTEX-OIZH-0005-SM-2HMJN	Blood	12.5812	6.16115	0.371002	20.0913	4.37111	9.93073	0.000999989	0.980983
GTEX-11XUK-1426-SM-5EQMG	Small Intestine	14.9513	11.7111	0.421002	24.8711	18.3804	37.4605	4.84098	5.32101
GTEX-WWYW-3126-SM-3NB39	Brain	6.11096	6.7309	0.0209995	6.89094	4.05106	0.671007	0.190994	0.721014
GTEX-QLQ7-1526-SM-2S1QA	Adipose Tissue	8.84094	10.4014	0.000999989	22.6714	29.0507	19.3411	1.17097	0.000999989
GTEX-13CIG-0011-R9a-SM-5K7VU	Brain	3.00091	6.63088	0.0909993	5.48085	2.24093	1.71095	0.280992	0.110998
GTEX-WOFL-0826-SM-3MJG1	Breast	8.85075	20.0315	0.061002	27.4513	13.7409	13.6006	1.76101	0.300993
GTEX-13FTW-1326-SM-5LZZD	Testis	8.58073	4.65087	0.0309997	2.07096	8.07073	3.43093	4.10107	0.130996
GTEX-OXRP-0126-SM-3NB32	Skin	13.131	16.1908	0.0810019	10.3009	18.1513	10.5612	1.40104	0.751008
GTEX-13NZ9-1026-SM-5MR5K	Breast	14.5808	18.841	0.110998	20.5605	14.4711	27.3715	2.87109	0.770999
GTEX-ZGAY-0926-SM-4WWBQ	Blood Vessel	10.4208	20.3817	0.000999989	2.49096	17.5306	1.62102	0.721014	0.121002
GTEX-Y8DK-0004-SM-4RGM7	Blood	12.3814	100.503	0.0410009	10.7012	5.46113	8.21124	0.201005	77.5309
GTEX-12ZZW-2326-SM-5DUW2	Adipose Tissue	10.1612	46.1225	0.0309997	19.1504	10.581	13.2406	3.92094	0.401007
GTEX-OHPJ-0006-SM-3LK6G	Blood	9.50114	6.16115	1.01101	22.4914	6.63088	17.3108	0.0509985	0.770999
GTEX-13PL6-0011-R9b-SM-5O9CH	Brain	1.36103	0.521016	0.271007	3.39097	1.69103	1.69103	0.501006	0.110998
GTEX-XOTO-0326-SM-4B66K	Nerve	7.6412	12.2008	0.0810019	19.8106	17.9511	11.8507	1.54104	0.300993
GTEX-13JVG-0726-SM-5KM16	Skin	8.59085	26.8919	0.000999989	4.9909	13.3106	10.0012	0.650987	0.730978
GTEX-WYVS-1126-SM-4SOJX	Colon	10.0512	10.2113	0.0509985	5.89095	14.4711	3.37105	3.63108	0.300993
K-562-SM-2S1Q5	Bone Marrow	12.2211	0.511002	0.311003	5.79095	15.5011	0.110998	0.000999989	0.721014
GTEX-131XW-0726-SM-5EGK3	Breast	12.301	20.8706	0.271007	10.8807	9.48074	8.07073	2.39098	2.86096
GTEX-WFON-1426-SM-4LVMT	Colon	11.5506	13.5808	0.171004	11.4907	12.9511	27.7017	2.96103	0.240999
GTEX-146FH-1226-SM-5NQB6	Lung	18.6306	32.8199	1.67099	41.2808	16.1113	23.1317	7.49122	1.57102
GTEX-U3ZN-0926-SM-4DXTU	Vagina	12.5708	10.7413	0.38101	10.7607	10.2809	18.8514	2.14102	0.361007
GTEX-11LCK-0926-SM-5A5KA	Heart	4.16091	1.85099	0.000999989	3.75106	4.49089	2.20106	0.511002	0.231006
GTEX-13O21-2426-SM-5MR4A	Colon	8.9012	15.1506	0.061002	10.9708	9.38073	28.3603	2.49096	0.000999989
GTEX-YB5K-1826-SM-5IFJC	Pancreas	2.161	1.50098	0.0209995	3.9411	5.64119	3.4011	0.501006	0.0209995
GTEX-13OW7-0426-SM-5K7VK	Skin	11.8408	25.9111	0.000999989	7.78124	21.7509	16.0011	1.76101	2.77099
GTEX-14A5I-2426-SM-5Q5CP	Colon	5.80099	9.75134	0.0710018	13.091	10.9207	6.201	1.84101	0.141003
GTEX-RWSA-2426-SM-47JXR	Testis	7.4009	5.90117	0.000999989	2.71095	6.81116	2.27096	2.03101	0.000999989
GTEX-ZY6K-0626-SM-59HJL	Esophagus	14.421	8.74101	0.34099	17.561	14.771	14.0111	1.30098	1.10099
GTEX-146FQ-1726-SM-5QGPX	Prostate	10.1809	8.68123	0.210998	11.541	10.6812	4.30108	1.98096	0.100998
GTEX-12126-1026-SM-5P9JJ	Brain	3.34105	2.53099	0.000999989	2.78099	3.84105	0.471	0.0909993	0.000999989
GTEX-XMK1-0001-SM-4B64F	Blood	13.7209	77.962	0.000999989	16.211	4.17102	9.23108	0.061002	46.2602
GTEX-13X6I-0011-R11a-SM-5P9HN	Brain	6.81116	1.02101	0.0410009	1.93094	9.35087	0.801014	0.130996	0.0410009
GTEX-WVLH-0011-R5A-SM-3MJFW	Brain	3.24091	4.86116	0.100998	2.08103	5.56083	0.861009	0.600985	0.0309997
GTEX-YFC4-1426-SM-5IFJG	Breast	8.6512	24.7302	0.371002	17.4409	13.681	7.54123	1.82096	0.390989
GTEX-WHPG-2226-SM-3NMBO	Muscle	4.2009	1.67099	0.000999989	1.63105	4.34092	1.60103	0.231006	0.0710018
GTEX-13OVH-1826-SM-5K7YW	Esophagus	6.82108	20.8215	0.0410009	33.7707	10.1008	12.0612	1.07103	0.160996
GTEX-113IC-0226-SM-5HL5C	Adipose Tissue	12.0311	27.8808	0.641002	20.5704	17.5804	19.6915	3.38112	0.901001
GTEX-11TUW-0226-SM-5LU8X	Thyroid	8.15113	16.291	0.34099	17.5914	23.4302	24.4303	1.37097	0.190994
GTEX-13OVI-1226-SM-5J2ME	Adrenal Gland	12.3608	30.8607	0.061002	5.68082	11.4613	2.50099	3.47112	0.580996
GTEX-145ME-1226-SM-5SIB6	Ovary	7.89096	32.591	0.000999989	1.64103	12.8207	0.401007	1.97096	0.000999989
GTEX-ZAJG-0526-SM-5S2MT	Muscle	3.17092	1.22103	0.061002	3.26097	7.16119	1.41098	0.181005	0.0309997
GTEX-12696-3126-SM-5FQUX	Pituitary	5.60106	9.50114	0.000999989	6.8709	18.3105	2.161	0.231006	0.330999
GTEX-ZP4G-0926-SM-4WWF4	Esophagus	16.0511	11.4114	0.0509985	6.89094	15.1506	5.72113	1.34099	0.390989
GTEX-111YS-2126-SM-5EGGM	Nerve	9.68129	13.6914	0.171004	10.8807	15.5409	7.3712	1.141	0.000999989
GTEX-11UD2-2826-SM-5GU6X	Testis	9.51102	7.74089	0.000999989	7.88112	9.38073	5.86081	0.511002	0.181005
GTEX-V955-2026-SM-3GAFA	Breast	7.32079	4.37111	0.000999989	19.801	25.5916	16.661	2.86096	0.000999989
GTEX-146FQ-0526-SM-5LU9I	Blood Vessel	9.35087	31.0711	0.210998	20.3309	13.5912	10.9914	3.65102	0.000999989
GTEX-131XG-1426-SM-5GCMO	Pancreas	2.93101	1.07103	0.000999989	3.42096	6.38108	4.2009	1.03097	0.0810019
GTEX-13OVG-0226-SM-5LU93	Thyroid	5.79095	11.7607	0.190994	14.421	20.051	25.1502	1.19102	0.0410009
GTEX-XAJ8-0008-SM-46MU7	Skin	9.28113	21.4009	0.000999989	4.19102	6.9509	6.15091	2.86096	0.061002
GTEX-ZYFD-2526-SM-5E45L	Prostate	3.92094	38.6019	0.271007	57.752	19.3117	2.28105	0.610981	1.34099
GTEX-13O3O-1526-SM-5KM1C	Heart	1.82096	1.42099	0.000999989	2.19102	3.55094	0.99103	0.0710018	0.061002
GTEX-13PVQ-1926-SM-5L3GN	Esophagus	5.00094	23.8216	0.0810019	15.1611	24.4913	7.69115	0.721014	0.000999989
GTEX-111FC-0826-SM-5GZWO	Heart	2.92108	4.52087	0.110998	2.741	4.16091	2.06094	0.650987	0.240999
GTEX-11EM3-1826-SM-5A5KO	Vagina	12.5612	14.7506	0.000999989	13.8614	19.8312	15.5506	1.801	0.100998
GTEX-14AS3-1626-SM-5S2OY	Breast	10.8913	11.1209	0.190994	6.62077	6.09109	8.72104	1.19102	0.861009
GTEX-UPK5-2126-SM-4JBJK	Stomach	7.29092	19.2916	0.251007	18.0709	12.3711	14.7006	3.29094	0.240999
GTEX-14BIN-0926-SM-5S2OZ	Blood Vessel	4.28086	16.9111	0.000999989	4.72102	9.54073	0.181005	1.22103	0.0810019
GTEX-12KS4-2126-SM-5FQUT	Skin	8.40123	19.9705	0.130996	7.771	13.341	9.07124	2.14102	1.04102
GTEX-RUSQ-1826-SM-2TF6E	Nerve	7.47099	15.9812	0.0710018	33.5909	19.3505	10.751	0.550991	0.0410009
GTEX-11NUK-1726-SM-5A5L2	Esophagus	4.31093	7.48084	0.0209995	6.19112	9.13117	5.08096	1.32097	0.220997
GTEX-Y3I4-0826-SM-4TT2A	Pancreas	3.47112	1.85099	0.0209995	4.52087	5.6209	6.48093	1.49102	0.210998
GTEX-145ME-0826-SM-5O9AF	Colon	14.3612	7.70076	0.061002	10.5707	22.6902	9.03109	1.72094	0.941022
GTEX-117YX-0326-SM-5GICL	Small Intestine	10.341	9.69069	0.000999989	11.8614	19.3117	6.72111	1.41098	0.311003
GTEX-13NYB-1826-SM-5J1N3	Small Intestine	6.40101	17.3216	0.000999989	12.1611	12.1906	4.03089	2.89106	0.740977
GTEX-14AS3-0426-SM-5QGQK	Adipose Tissue	10.6908	8.32125	0.531006	14.2106	14.1007	10.091	3.97099	0.311003
GTEX-R55C-1926-SM-2TF4K	Nerve	8.22092	14.8511	0.000999989	11.6608	18.2813	7.7109	0.960994	0.100998
GTEX-VUSG-2226-SM-4KKZO	Breast	13.6412	21.9706	0.201005	10.6812	18.341	27.5809	3.60101	0.160996
GTEX-12WSB-0011-R1b-SM-5P9EY	Brain	1.73099	0.790973	0.0309997	2.77099	2.29104	0.34099	0.220997	0.0209995
GTEX-WOFL-0726-SM-3MJG4	Thyroid	6.15091	16.3509	0.201005	27.9601	13.6914	27.5905	0.790973	0.000999989
GTEX-13NZA-0826-SM-5K7WS	Heart	2.04103	7.46116	0.061002	16.1012	4.3211	4.66087	0.410997	0.0410009
GTEX-YJ89-0126-SM-4TT3X	Skin	15.4411	8.201	0.0209995	5.92083	20.001	14.9006	1.58096	0.99103
GTEX-11DXX-2426-SM-5GZZW	Skin	11.0809	9.3211	0.130996	9.08131	15.8708	10.1908	0.541	0.220997
GTEX-11OC5-0426-SM-5Q5AR	Blood Vessel	9.91079	17.4905	0.000999989	6.05111	16.3509	0.460988	0.861009	0.000999989
GTEX-13FTW-0326-SM-5K7UW	Skin	9.93073	28.0903	0.0209995	9.43093	18.7108	13.091	0.950989	2.88106
GTEX-11P81-1626-SM-5BC52	Uterus	12.7507	39.4513	0.210998	7.211	15.0511	5.95087	3.07098	0.0710018
GTEX-WRHK-0426-SM-4MVOG	Esophagus	10.4107	5.84094	0.000999989	3.88092	13.3707	2.87109	1.10099	0.061002
GTEX-Q734-0626-SM-2I3EF	Lung	10.6111	34.7009	4.22104	37.4216	15.4711	24.7902	3.90088	1.60103
GTEX-RVPV-0526-SM-47JYL	Esophagus	7.13098	8.9507	0.141003	18.8514	11.7509	12.3608	1.70102	0.121002
GTEX-12WS9-0011-R4b-SM-5P9EU	Brain	1.05103	0.580996	0.000999989	1.43098	1.38099	0.300993	0.110998	0.150998
GTEX-13O1R-2326-SM-5IJF9	Adrenal Gland	14.3413	32.5616	0.201005	23.4205	17.4215	4.30108	1.72094	2.11096
GTEX-12126-0011-R9b-SM-5BC6P	Brain	5.56083	1.98096	0.0909993	5.96119	2.50099	1.60103	1.95098	0.160996
GTEX-13X6H-0626-SM-5LU53	Pancreas	3.84105	3.18104	0.0410009	3.37105	12.2313	6.27102	2.30106	0.150998
GTEX-148VJ-0011-R9b-SM-5SI77	Brain	4.19102	0.630995	0.150998	2.78099	3.16104	0.850982	0.121002	0.0209995
GTEX-XUW1-1026-SM-4BONY	Thyroid	9.84097	9.6011	0.0810019	11.0112	16.4806	33.3705	1.60103	0.251007
GTEX-12ZZX-1926-SM-5EGKC	Vagina	7.50109	30.9614	0.121002	17.3408	9.21127	13.4506	1.75103	0.061002
GTEX-131YS-2926-SM-5EGKI	Colon	9.91079	8.6512	0.0909993	11.3506	13.131	6.33085	2.82099	0.260996
GTEX-13VXT-1426-SM-5LU4B	Lung	11.5811	24.8418	0.150998	19.9207	23.0917	16.6206	3.85091	1.05103
GTEX-X4XY-0826-SM-4E3JM	Thyroid	11.041	15.2612	0.0710018	11.4209	16.5012	25.0511	2.08103	0.0810019
GTEX-11TT1-0005-SM-5NQ8Y	Blood	22.6902	13.681	0.35099	56.54	9.3211	37.0602	0.061002	1.44103
GTEX-139YR-2426-SM-5J1OB	Adipose Tissue	10.3913	15.8708	0.0209995	14.5707	16.0011	15.2909	1.11103	0.0909993
GTEX-13OVL-1326-SM-5IJCZ	Blood Vessel	6.67099	24.1307	0.000999989	5.21114	10.7607	1.62102	1.60103	0.171004
GTEX-131XE-2726-SM-5P9G7	Muscle	2.66106	1.40104	0.000999989	2.31097	5.83082	1.53103	0.220997	0.0410009
GTEX-11P81-2226-SM-5PNYI	Skin	9.38073	12.5708	0.000999989	4.94099	16.3906	8.22092	1.93094	0.801014
GTEX-WH7G-0002-SM-4LVN9	Blood	18.0409	78.1514	1.83096	14.8305	11.0609	14.3413	0.0410009	68.3799
K-562-SM-4WAWH	Bone Marrow	14.9109	1.38099	0.121002	4.30108	11.3814	0.311003	0.000999989	0.35099
GTEX-13112-2126-SM-5GCO4	Kidney	7.24106	4.87094	0.0410009	6.29105	8.60097	7.48084	2.38105	0.280992
GTEX-1314G-0826-SM-5BC6L	Esophagus	9.69069	26.3513	0.590988	41.692	17.2712	25.6805	2.87109	0.671007
GTEX-131XH-2926-SM-5LZU4	Brain	4.04097	0.231006	0.000999989	0.99103	10.6812	0.580996	0.130996	0.0410009
GTEX-WHPG-2126-SM-4M1ZM	Adipose Tissue	9.44074	13.7313	0.190994	22.0407	17.5804	22.3608	3.56104	0.0410009
GTEX-ZC5H-0008-SM-4WAX8	Skin	30.7817	31.702	0.000999989	7.91122	16.8211	2.78099	3.10093	0.0810019
GTEX-Y5V6-0003-SM-4V6FX	Blood	18.3308	63.36	0.000999989	9.75134	8.47081	8.71077	0.121002	105.668
GTEX-X4EP-3226-SM-3P5YR	Pituitary	6.84097	4.14106	0.150998	15.0605	10.3109	2.98101	0.330999	0.141003
GTEX-132AR-0326-SM-5KM2C	Skin	9.27084	7.50109	0.141003	11.291	13.611	12.0011	1.49102	0.801014
GTEX-OHPK-2526-SM-3MJH9	Vagina	9.66118	10.271	0.150998	15.9314	12.8607	14.0715	2.92108	0.240999
GTEX-ZVTK-0008-SM-57WDA	Skin	16.5711	30.7603	0.0209995	6.52103	16.0011	4.88108	2.91097	0.0810019
GTEX-131XH-0011-R1a-SM-5DUWA	Brain	6.16115	5.30113	0.000999989	1.16103	3.42096	0.781003	0.390989	0.000999989
GTEX-145MI-0011-R10a-SM-5PNZD	Brain	5.89095	5.91099	0.0810019	26.191	5.84094	0.171004	0.511002	1.23097
GTEX-14BMU-1326-SM-5RQIH	Colon	13.2912	7.63115	0.0509985	6.19112	17.0606	4.47101	1.881	0.740977
GTEX-UPJH-0826-SM-4WKFD	Lung	5.33098	54.0304	1.31103	49.5805	14.5113	11.2808	0.93103	2.841
GTEX-POMQ-1226-SM-3P61F	Uterus	17.5914	10.9807	0.160996	13.4106	16.631	13.6507	2.27096	0.190994
GTEX-12WSC-0826-SM-5EQ5Q	Thyroid	5.67099	18.8305	0.460988	20.3506	12.2313	18.5816	2.63098	0.531006
GTEX-X585-0011-R2B-SM-46MVF	Brain	7.6211	6.40101	0.0309997	8.25118	7.78124	4.56116	1.63105	0.550991
GTEX-Y8LW-0426-SM-4VBQ6	Blood Vessel	10.7607	17.0512	0.0909993	29.2913	17.4215	6.15091	0.980983	0.0410009
GTEX-14A5H-1626-SM-5SIAN	Colon	4.68095	10.8807	0.0309997	15.1212	29.2609	3.87098	1.19102	0.061002
GTEX-13X6J-3126-SM-5Q5EJ	Pituitary	8.83114	17.2306	0.171004	5.99101	11.8408	3.9611	3.71098	0.330999
GTEX-ZDTT-2726-SM-4WKF8	Skin	7.59105	8.94078	0.0710018	4.4009	18.7511	11.5707	0.93103	0.110998
GTEX-T5JW-1826-SM-3GAE1	Muscle	3.39097	1.10099	0.000999989	1.50098	7.35079	0.901001	0.190994	0.000999989
GTEX-139TU-0726-SM-5L3EK	Skin	9.77096	10.9109	0.0509985	5.88116	15.5108	9.52091	0.740977	0.561011
GTEX-W5X1-0826-SM-3GILN	Heart	1.53103	1.65095	0.130996	2.60106	2.72093	1.97096	0.32099	0.100998
GTEX-WRHK-0005-SM-3MJF5	Blood	26.8007	30.211	0.160996	106.728	16.211	74.213	0.0209995	1.49102
GTEX-Z93S-0011-R3b-SM-4RGNH	Brain	2.70101	0.811015	0.000999989	1.15101	3.26097	0.401007	0.150998	0.0309997
GTEX-XYKS-0526-SM-4BRW2	Lung	11.4312	14.2008	0.141003	24.6514	18.8606	15.5711	1.50098	1.211
GTEX-XPVG-2526-SM-4B66D	Muscle	4.70111	0.99103	0.000999989	1.69103	5.15117	1.33099	0.0710018	0.0810019
GTEX-X4XX-0011-R10B-SM-46MWO	Brain	6.08096	3.00091	0.000999989	2.54101	5.75095	0.680987	0.300993	0.271007
GTEX-11EMC-3226-SM-5EGKW	Brain	2.80092	3.93101	0.000999989	2.85106	3.92094	1.35097	0.220997	0.0909993
GTEX-X4XX-0011-R6B-SM-46MWP	Brain	4.48094	4.76112	0.000999989	2.31097	5.0711	0.960994	0.550991	0.361007
GTEX-Q2AH-0008-SM-48U2J	Skin	20.2114	29.8612	0.000999989	10.9314	11.6608	2.45105	5.08096	0.000999989
GTEX-ZTTD-2826-SM-4YCFA	Skin	12.0512	8.61111	0.0410009	7.72107	15.1013	10.3109	0.821026	0.451
GTEX-X4EO-1226-SM-4QARR	Esophagus	11.1209	16.6806	0.231006	14.8305	13.0511	18.6409	2.9011	0.471
GTEX-13FTW-2326-SM-5K7YS	Muscle	4.92117	1.34099	0.000999989	2.45105	5.9311	1.42099	0.141003	0.000999989
GTEX-WI4N-0626-SM-3TW8Z	Heart	4.0609	5.60106	0.0209995	13.0014	4.94099	4.31093	0.280992	7.23102
GTEX-ZXES-0008-SM-57WCX	Skin	17.4312	32.6203	0.000999989	7.09105	13.9714	4.69101	2.94099	0.000999989
GTEX-11VI4-0726-SM-5GU5B	Vagina	10.521	10.6206	0.201005	17.3709	13.3512	11.7509	4.14106	0.110998
GTEX-RU72-0011-R11A-SM-5SI8G	Brain	6.57094	1.41098	0.000999989	0.870973	12.9313	0.32099	0.150998	0.000999989
GTEX-R55E-0526-SM-2TC6B	Muscle	2.94099	1.10099	0.0410009	1.26103	2.32093	1.66106	0.150998	0.0410009
GTEX-11P7K-0626-SM-5985Z	Prostate	8.79083	9.48074	0.121002	6.99101	12.8509	4.76112	4.12102	0.0309997
GTEX-13OW8-1226-SM-5K7XD	Adipose Tissue	9.84097	16.6413	0.110998	18.9405	17.0713	17.0914	4.05106	0.0909993
GTEX-RVPV-0006-SM-2TF6Q	Blood	0.650987	2.9011	0.480997	7.69115	1.31103	5.29085	0.000999989	2.06094
GTEX-POMQ-0626-SM-3P61E	Esophagus	15.5711	6.55093	0.251007	6.83102	16.3407	6.66082	3.081	0.181005
GTEX-QDVN-1326-SM-48TZ3	Colon	14.6112	11.0809	0.0410009	20.0607	11.9712	20.9605	2.32093	0.271007
GTEX-ZYW4-0526-SM-5GZZ5	Muscle	2.20106	3.23104	0.000999989	2.29104	4.71089	3.51104	0.110998	0.000999989
GTEX-OOBJ-0226-SM-2YUMM	Adipose Tissue	8.85075	16.2515	0.0909993	14.5113	23.6112	18.9208	1.68098	0.0410009
GTEX-NPJ8-0011-R3a-SM-2HMIW	Brain	4.44105	5.59098	0.0810019	9.1413	7.43122	2.29104	1.56103	0.190994
GTEX-11P7K-0826-SM-5BC5F	Adipose Tissue	6.23116	13.071	0.160996	25.0615	18.7004	10.0708	3.43093	0.590988
GTEX-Y111-2026-SM-4SOJA	Breast	8.58073	15.5506	0.110998	17.4409	12.4313	20.0913	2.83098	0.491002
GTEX-R55F-0126-SM-48FCK	Skin	7.85113	13.5414	0.150998	16.8304	15.5205	22.1004	0.69102	4.31093
GTEX-13NZ8-1626-SM-5IJBC	Blood Vessel	4.27108	25.4713	0.000999989	11.8113	11.0112	1.54104	1.49102	0.0909993
GTEX-XBED-1026-SM-48TCB	Esophagus	9.54073	9.34115	0.0810019	18.2408	14.9306	16.0011	2.35104	0.431012
GTEX-14DAR-1426-SM-5RQIR	Small Intestine	11.521	5.64119	0.141003	11.4407	21.4707	45.1608	5.27109	0.0810019
GTEX-13FLV-0126-SM-5K7WT	Skin	10.4107	17.981	0.000999989	6.83102	22.7517	14.8707	1.96101	1.01101
GTEX-WRHU-2826-SM-3MJG8	Skin	11.151	31.79	0.0410009	8.31087	20.4808	17.0311	1.28103	0.521016
GTEX-132QS-0226-SM-5IFFZ	Spleen	13.2214	11.2107	2.50099	46.4401	22.0316	31.0216	0.921017	3.86107
GTEX-RNOR-0011-R3A-SM-2TF5J	Brain	6.03101	1.86103	0.000999989	1.941	2.48096	0.181005	0.531006	0.000999989
GTEX-XUW1-0926-SM-4BONX	Skin	5.52089	8.8012	0.0209995	7.18108	19.2809	13.2214	0.621015	0.141003
GTEX-POMQ-2026-SM-2S1OD	Nerve	8.84094	15.8115	0.150998	14.0413	18.8606	6.46119	3.82113	0.0909993
GTEX-ZTX8-1626-SM-51MRY	Muscle	5.67099	1.02101	0.000999989	1.29101	5.00094	0.69102	0.121002	0.0209995
GTEX-T6MO-0526-SM-4DM6R	Esophagus	12.8411	7.99113	0.0710018	14.7813	10.9412	14.4811	2.53099	0.390989
GTEX-ZDTS-1326-SM-4WKGX	Heart	1.84101	3.85091	0.0309997	2.161	2.64103	1.97096	0.361007	1.19102
GTEX-T5JC-0011-R6A-SM-5SI89	Brain	4.90108	6.67099	0.0909993	7.15078	2.96103	1.10099	0.460988	0.231006
GTEX-Y5LM-0005-SM-4V6EJ	Blood	32.1311	22.001	0.0710018	65.3312	13.2315	66.6901	0.0109996	0.921017
GTEX-WHSB-0226-SM-4M1XE	Blood Vessel	9.56126	17.5306	0.280992	12.8411	17.3408	7.80122	1.92106	0.0410009
GTEX-11EQ8-1326-SM-5EGJQ	Heart	2.55107	8.03111	0.220997	49.4124	6.61114	1.76101	0.880992	0.330999
GTEX-12C56-0006-SM-5N9E9	Blood	8.69087	4.34092	0.171004	19.671	3.68101	18.3016	0.000999989	0.471
GTEX-14AS3-1726-SM-5RQJV	Vagina	2.37101	13.2406	0.000999989	9.19086	6.42101	8.8012	0.910986	0.0410009
GTEX-ZV68-0011-R5a-SM-4YCDW	Brain	2.26106	6.01098	0.000999989	1.38099	2.23101	0.210998	0.171004	0.0810019
GTEX-11XUK-2026-SM-5EQLF	Skin	11.5107	7.34112	0.0309997	5.41102	13.7809	14.0413	1.62102	0.190994
GTEX-ZZ64-1326-SM-5E444	Blood Vessel	10.9011	12.2313	0.0209995	5.99101	13.5611	4.39085	0.600985	0.0509985
GTEX-144GN-2326-SM-5LU4F	Skin	10.9412	8.47081	0.0810019	9.42113	15.6707	10.031	1.06098	0.770999
GTEX-145ME-0526-SM-5QGQV	Esophagus	19.0313	16.3713	0.910986	18.9405	19.5609	15.6707	4.35086	1.801
GTEX-Y5V6-0008-SM-4V6FV	Skin	20.3309	39.9909	0.000999989	11.9009	12.2907	2.91097	3.84105	0.000999989
GTEX-11EM3-0526-SM-5H12N	Blood Vessel	8.32125	24.1408	0.0309997	5.48085	15.0605	2.56099	1.29101	0.150998
GTEX-UPIC-0626-SM-4IHK2	Esophagus	11.6407	6.49082	0.0909993	5.52089	15.7208	5.45092	1.52098	0.210998
GTEX-X4EP-0326-SM-3P5Z6	Heart	2.30106	4.79091	0.0209995	10.7711	4.78096	2.47101	0.511002	0.0509985
GTEX-13O21-1826-SM-5MR5M	Nerve	10.1113	25.0406	0.171004	12.261	14.0812	8.06123	1.38099	0.190994
GTEX-ZDYS-2326-SM-4WKG6	Colon	14.721	13.071	0.451	10.4014	16.531	40.6307	5.4009	0.550991
GTEX-11XUK-0126-SM-5CVLK	Adrenal Gland	13.4506	24.8815	0.0509985	4.30108	7.78124	1.881	4.62098	0.460988
GTEX-ZT9W-0726-SM-4YCDC	Lung	9.6311	31.4219	0.38101	30.3705	24.2313	20.9503	3.44093	1.15101
GTEX-ZV7C-0526-SM-51MRB	Heart	3.30099	2.77099	0.0410009	10.0708	6.61114	1.941	0.121002	0.32099
GTEX-12696-1926-SM-5EGJT	Colon	7.86093	9.23108	0.000999989	8.47081	15.9812	6.14111	1.76101	0.0909993
GTEX-12WSB-3026-SM-59HKM	Brain	6.66082	2.28105	0.000999989	2.26106	9.7412	1.16103	0.171004	0.110998
GTEX-13NYB-2926-SM-5K7VH	Blood Vessel	6.46119	16.3906	0.0209995	5.22091	7.57108	0.781003	0.980983	0.220997
GTEX-14ABY-0011-R9a-SM-5PNZK	Brain	5.94098	2.49096	0.171004	4.04097	4.93107	2.75108	1.79104	0.130996
GTEX-ZLWG-1226-SM-4WWFS	Esophagus	13.2113	11.0709	0.000999989	6.25106	16.3509	4.57097	1.96101	0.361007
GTEX-11UD1-0126-SM-5PNYG	Skin	8.94078	3.62103	0.0309997	4.11103	13.341	8.87102	0.721014	0.160996
GTEX-YB5K-0426-SM-5LUA4	Blood Vessel	16.3509	20.8807	0.0209995	32.1913	14.1507	12.5612	1.40104	22.7107
GTEX-12WSN-2526-SM-5LZU8	Muscle	3.54111	0.701007	0.000999989	1.78102	3.57093	1.73099	0.150998	0.000999989
GTEX-R55G-0008-SM-48FEX	Skin	16.4407	57.3491	0.000999989	6.43081	15.3514	0.861009	5.25103	0.000999989
GTEX-12WSK-0226-SM-5BC62	Pancreas	2.98101	2.55107	0.0209995	4.47101	5.73105	2.18102	1.95098	0.0410009
GTEX-13YAN-0526-SM-5O9BE	Muscle	3.56104	12.631	0.0309997	6.55093	13.7114	5.73105	0.130996	0.0209995
GTEX-Q734-0526-SM-2I3EH	Thyroid	13.071	18.9208	0.240999	18.6914	16.4304	26.3202	3.81108	0.0710018
GTEX-RNOR-0526-SM-2TF4O	Muscle	2.53099	0.801014	0.000999989	1.26103	3.32096	0.740977	0.32099	0.171004
GTEX-ZQG8-2426-SM-57WEE	Colon	12.0712	6.39082	0.000999989	7.27123	14.3711	5.54082	2.37101	0.680987
GTEX-12WSA-0011-R5b-SM-5GU5I	Brain	4.26102	6.7309	0.000999989	1.03097	2.47101	0.220997	0.901001	0.0209995
GTEX-RWS6-0326-SM-2XCAP	Heart	1.43098	1.68098	0.0810019	2.39098	4.05106	1.70102	0.260996	0.061002
GTEX-WH7G-0526-SM-3NMBI	Thyroid	9.01108	7.85113	0.100998	7.42093	18.7914	13.2012	3.17092	0.0909993
GTEX-ZLV1-1426-SM-4WWES	Breast	14.6213	14.5707	0.000999989	19.6915	15.2306	13.0213	2.02104	0.740977
GTEX-12696-1426-SM-5EGJ6	Esophagus	8.38087	10.0708	0.110998	9.26121	16.211	6.3612	1.08103	0.0810019
GTEX-T2IS-0126-SM-4DM6O	Skin	14.051	8.81096	0.000999989	6.09109	21.3003	10.0012	1.03097	0.650987
GTEX-13O1R-2526-SM-5N9FW	Kidney	7.11123	9.30109	0.240999	20.0204	13.131	5.56083	0.99103	0.35099
GTEX-OIZH-1426-SM-3NB1O	Colon	12.961	14.1507	0.061002	10.8011	17.0914	22.9004	2.42099	0.141003
GTEX-QESD-0226-SM-447BH	Pancreas	2.58095	0.501006	0.0509985	3.63108	6.06119	4.55105	0.69102	0.0209995
GTEX-1399T-0011-R4b-SM-5DUVX	Brain	1.78102	0.850982	0.0509985	0.99103	1.99101	1.19102	0.300993	0.121002
GTEX-QV31-1426-SM-2S1QD	Muscle	3.05104	1.09104	0.000999989	1.34099	5.011	1.34099	0.220997	0.000999989
GTEX-ZVT4-0226-SM-51MSD	Adipose Tissue	7.39116	17.9312	0.0909993	20.5405	15.9115	9.75134	1.71095	0.0810019
GTEX-OOBK-2025-SM-3LK5S	Prostate	9.58116	8.83114	0.061002	6.68117	15.6512	3.21095	0.721014	0.201005
K-562-SM-5QGOR	Bone Marrow	14.451	0.841013	0.0209995	3.21095	14.261	0.240999	0.0410009	0.501006
GTEX-12WSM-0626-SM-5GCOK	Adipose Tissue	8.70111	24.7113	0.210998	19.2115	14.2808	15.3206	2.9709	1.06098
GTEX-ZE9C-0011-R7a-SM-4WWCX	Brain	3.9109	7.24106	0.121002	2.45105	4.231	0.410997	0.240999	0.130996
GTEX-ZP4G-2226-SM-57WFB	Nerve	12.6013	19.1916	0.000999989	10.3913	13.9114	6.37091	2.44105	0.000999989
GTEX-1477Z-1126-SM-5P9GK	Heart	1.91096	9.21127	0.000999989	11.161	6.31114	5.03084	0.451	0.0410009
GTEX-13X6K-0011-R5b-SM-5PNUE	Brain	3.87098	3.50108	0.0209995	2.38105	4.94099	0.790973	0.311003	0.0410009
GTEX-13X6K-3026-SM-5QGPA	Pituitary	6.30108	7.70076	0.0909993	4.96089	11.7713	2.64103	1.28103	0.210998
GTEX-TKQ1-0126-SM-33HB3	Thyroid	7.50109	7.52087	0.100998	9.06119	23.2716	20.051	1.43098	0.0810019
GTEX-11EI6-0426-SM-5EQ43	Nerve	7.44102	20.4015	0.0810019	26.6304	14.2008	5.77091	2.81103	0.000999989
GTEX-13OW6-2926-SM-5KM29	Brain	8.25118	1.06098	0.000999989	1.131	13.2012	1.00097	0.251007	0.0410009
GTEX-131XE-0006-SM-5P9F9	Blood	6.62077	1.31103	0.150998	5.84094	1.87099	7.00119	0.000999989	0.571015
GTEX-YF7O-0426-SM-5P9FS	Heart	7.29092	2.69092	0.0810019	3.27093	4.27108	2.08103	0.291002	0.171004
GTEX-Y9LG-2226-SM-4VDS9	Nerve	6.2411	8.94078	0.0509985	12.4011	10.2213	8.13082	0.561011	0.000999989
GTEX-OXRP-2426-SM-2S1NR	Blood Vessel	5.6209	19.8807	0.000999989	16.631	13.3911	3.42096	0.641002	0.210998
GTEX-11ZTT-1626-SM-5EQKR	Colon	8.27122	12.7507	0.0810019	6.10081	15.2306	3.6609	4.10107	1.35097
GTEX-13CF2-0011-R5a-SM-5LZWS	Brain	1.241	1.61105	0.061002	0.790973	1.87099	0.210998	0.251007	0.0109996
GTEX-S4Q7-0006-SM-3K2AT	Blood	20.5007	33.8504	0.130996	54.1617	7.93098	32.0111	0.0109996	1.64103
GTEX-S3XE-1326-SM-4AD4H	Prostate	8.50081	15.8609	0.0909993	14.5707	23.291	4.59097	2.211	0.130996
GTEX-N7MT-0726-SM-3TW8S	Uterus	7.82125	30.6412	0.171004	45.9725	12.9009	8.40123	2.52101	0.330999
GTEX-146FH-1126-SM-5NQAT	Heart	8.00111	6.201	0.121002	8.68123	6.51109	7.36099	1.16103	0.000999989
GTEX-12WSF-0011-R7b-SM-5HL99	Brain	2.02104	3.68101	0.0710018	5.12091	2.30106	0.680987	0.0909993	0.061002
GTEX-11GSP-3126-SM-5A5LL	Brain	5.17084	1.06098	0.0309997	8.6512	13.0312	0.300993	0.251007	0.801014
GTEX-13RTJ-3126-SM-5S2Q4	Brain	5.16118	1.04102	0.000999989	1.881	11.0809	1.57102	0.190994	0.000999989
GTEX-13X6K-0011-R4b-SM-5P9HO	Brain	3.85091	4.93107	0.000999989	2.89106	5.14083	1.39098	0.650987	0.141003
GTEX-131YS-2426-SM-5J2OD	Vagina	7.19104	26.3915	0.421002	32.4715	16.7316	24.7816	6.06119	0.121002
GTEX-13OVJ-0011-R8b-SM-5L3FS	Brain	3.32096	6.18083	0.000999989	14.5314	6.18083	1.71095	0.501006	0.280992
GTEX-QLQ7-1926-SM-2S1R6	Blood Vessel	7.97122	13.341	0.000999989	15.2708	23.1702	10.751	1.27103	0.000999989
GTEX-12KS4-0005-SM-5SI94	Blood	3.98091	7.15078	1.57102	18.1614	3.6609	15.6707	0.100998	1.38099
GTEX-Y9LG-1026-SM-5IFJN	Stomach	5.31106	3.93101	0.390989	13.951	17.1412	25.6609	0.571015	0.311003
GTEX-11P82-1326-SM-5HL62	Breast	7.48084	2.09101	0.0209995	11.2107	13.131	5.81105	0.390989	0.0909993
GTEX-XOTO-3026-SM-4B65M	Brain	3.68101	2.04103	0.0410009	3.81108	5.49112	0.600985	0.0909993	0.150998
GTEX-11TUW-2126-SM-5GU7B	Prostate	6.32121	6.31114	0.061002	15.4507	19.3505	6.03101	0.630995	0.0410009
GTEX-OXRL-1626-SM-2YUMU	Muscle	4.90108	0.710989	0.000999989	1.00097	5.23105	0.790973	0.061002	0.061002
GTEX-R55F-0011-R6A-SM-2TF4L	Brain	3.69097	1.551	0.000999989	0.730978	4.55105	0.541	0.531006	0.311003
GTEX-11VI4-0426-SM-5EGHZ	Pancreas	2.92108	1.11103	0.061002	5.15117	5.99101	5.44111	1.17097	0.38101
GTEX-REY6-0005-SM-2TF54	Blood	5.6209	8.36114	3.72102	27.3809	3.65102	12.3711	0.0209995	1.471
GTEX-QV31-0526-SM-447C3	Esophagus	12.3608	7.11123	0.190994	15.2011	13.091	20.2816	3.88092	0.781003
GTEX-12WSL-0226-SM-5CVMJ	Liver	4.77103	2.10103	0.061002	2.87109	10.3309	0.99103	0.291002	0.160996
GTEX-QDVN-2226-SM-2S1PM	Nerve	7.58106	16.5711	0.0209995	23.8117	17.2605	8.9012	0.710989	0.121002
GTEX-WYVS-0006-SM-3NMA7	Blood	17.1912	7.45082	3.34105	25.8107	7.13098	24.8005	0.220997	2.00097
GTEX-11ZVC-0726-SM-5FQT9	Liver	2.96103	3.17092	0.110998	5.21114	9.36124	0.511002	0.550991	0.0410009
GTEX-ZYVF-2726-SM-5GID4	Stomach	3.59104	17.9213	0.0810019	25.1502	6.03101	5.71083	1.33099	0.0309997
GTEX-12WSL-1126-SM-5CVNK	Adipose Tissue	14.2215	18.4213	0.0710018	26.231	17.0512	11.561	2.59098	0.410997
GTEX-PWN1-1526-SM-48TDA	Stomach	8.82074	3.25104	0.150998	8.87102	10.7913	21.0405	1.60103	0.100998
GTEX-XQ3S-0426-SM-4BOOA	Muscle	3.51104	1.32097	0.000999989	0.980983	2.57095	0.721014	0.0810019	0.0410009
GTEX-13PVR-0926-SM-5S2RB	Heart	2.87109	3.35102	0.110998	6.06119	5.27109	3.19098	0.431012	0.330999
GTEX-13OVI-2326-SM-5KM47	Salivary Gland	16.7107	15.4807	0.38101	11.5907	19.7612	27.1711	2.9011	1.65095
GTEX-ZYT6-1426-SM-5E43U	Nerve	10.7012	20.1415	0.201005	19.671	20.7307	14.1311	3.45097	0.201005
GTEX-11WQK-2626-SM-5EQ4K	Stomach	5.23105	13.5114	0.0309997	23.2507	21.1209	3.77088	0.980983	0.110998
GTEX-131XF-2426-SM-5BC6C	Nerve	10.5509	16.9604	0.000999989	7.36099	15.0908	5.46113	3.06099	0.0309997
GTEX-1212Z-0126-SM-59HK4	Skin	9.55132	9.93073	0.0209995	8.26091	19.9512	16.0211	0.600985	0.891002
GTEX-11NV4-2126-SM-5N9DS	Brain	1.45095	1.64103	0.000999989	1.511	2.24093	1.76101	0.371002	0.0909993
GTEX-139T8-0011-R3b-SM-5HL4R	Brain	1.53103	2.79103	0.0909993	3.21095	2.39098	0.841013	0.160996	0.000999989
GTEX-13PDP-0011-R6b-SM-5O9D5	Brain	1.44103	1.34099	0.000999989	13.7114	1.37097	0.130996	0.0810019	0.000999989
GTEX-13FHP-0926-SM-5L3EC	Thyroid	8.51083	32.3008	0.431012	21.3313	14.721	30.6306	2.48096	1.01101
GTEX-WVLH-1426-SM-4MVNX	Esophagus	7.9508	10.6708	0.240999	18.4008	9.72097	13.7914	1.82096	0.630995
GTEX-146FR-2426-SM-5NQAU	Vagina	10.9511	13.8614	0.0410009	9.65114	14.6812	11.291	2.03101	0.000999989
GTEX-12584-1426-SM-5EGJ9	Lung	2.12093	89.9094	1.45095	41.982	4.48094	7.58106	0.550991	18.9707
GTEX-14ASI-0011-R8b-SM-5S2UB	Brain	5.32101	1.27103	0.0810019	1.70102	5.21114	0.641002	0.280992	0.000999989
GTEX-XQ8I-0826-SM-4BOOE	Blood Vessel	9.9908	17.5707	0.000999989	3.02095	16.3611	1.95098	0.980983	0.000999989
GTEX-1117F-1326-SM-5EGHH	Adipose Tissue	6.46119	23.5916	0.480997	29.271	9.26121	7.35079	1.39098	1.59096
GTEX-13O3P-0226-SM-5KM3Z	Adipose Tissue	9.95071	10.8913	0.110998	23.2008	15.6512	23.0613	0.870973	0.231006
GTEX-WY7C-0126-SM-4ONCO	Spleen	15.6111	10.2113	1.76101	42.4914	17.3408	35.9121	0.761017	8.00111
GTEX-WHPG-1026-SM-3NMBA	Heart	3.74094	9.13117	0.0410009	7.20101	7.63115	4.81088	2.12093	0.300993
GTEX-145MO-2226-SM-5Q5BN	Stomach	3.41101	6.53098	0.0909993	7.03085	5.67099	7.69115	0.66099	0.201005
GTEX-QLQ7-0008-SM-447AW	Skin	25.3006	75.8091	0.000999989	7.59105	19.7914	5.46113	10.1008	0.0309997
GTEX-Y8DK-0011-R3A-SM-4RTW5	Brain	3.85091	2.27096	0.000999989	0.69102	3.62103	0.121002	0.311003	0.0509985
GTEX-Q2AI-1526-SM-3GIJ3	Muscle	2.38105	1.96101	0.0509985	1.551	6.2208	0.460988	0.34099	0.000999989
GTEX-QEG4-0626-SM-2S1OY	Muscle	2.59098	1.38099	0.000999989	1.37097	3.481	1.00097	0.300993	0.141003
GTEX-13FHP-2426-SM-5KLZ5	Colon	8.24089	13.8614	0.34099	24.6002	13.151	15.7415	2.99094	0.901001
GTEX-145MG-0011-R7b-SM-5P9JY	Brain	1.62102	1.89094	0.0109996	0.880992	2.54101	0.361007	0.201005	0.0309997
GTEX-13FXS-1126-SM-5IJBB	Blood Vessel	5.70094	28.0203	0.190994	15.3312	13.2012	3.481	1.71095	0.330999
GTEX-139UW-0426-SM-5K7V4	Blood Vessel	10.8408	12.3308	0.0909993	15.0908	14.5012	2.87109	0.371002	0.210998
GTEX-13JVG-0011-R3b-SM-5LZXF	Brain	1.48103	3.17092	0.0209995	8.54097	3.53106	0.491002	0.210998	0.121002
GTEX-QV44-0126-SM-4R1KH	Spleen	11.9712	8.27122	3.77088	37.2921	11.7811	24.4117	0.621015	3.42096
GTEX-11NV4-0005-SM-5N9EX	Blood	2.26106	21.5617	19.8106	64.6196	13.3512	37.0012	0.441015	30.97
GTEX-13U4I-1126-SM-5LU3S	Esophagus	18.9812	12.3908	0.421002	19.1716	17.1615	22.991	4.62098	0.541
GTEX-13CF3-0226-SM-5J1NW	Spleen	13.4506	17.2115	3.39097	35.9919	15.2612	30.2319	0.521016	2.38105
GTEX-14A5I-2926-SM-5Q5CQ	Brain	4.17102	2.44105	0.000999989	1.08103	4.78096	0.220997	0.35099	0.0509985
GTEX-ZYWO-0626-SM-5E45K	Heart	5.78092	3.42096	0.141003	4.94099	5.21114	3.0409	1.34099	0.0209995
GTEX-ZDYS-2426-SM-4WKGI	Skin	8.99111	12.9206	0.0410009	5.09083	17.4107	7.09105	1.79104	0.410997
GTEX-Y8E4-1226-SM-5IFIM	Adipose Tissue	13.1711	18.2004	0.300993	20.6504	14.411	16.5207	3.4909	0.38101
GTEX-111CU-1326-SM-5NQ8L	Small Intestine	10.8108	8.00111	0.0209995	11.1309	20.5904	7.72107	2.25105	1.30098
GTEX-QVUS-0011-R4A-SM-3GAE7	Brain	1.70102	1.36103	0.000999989	5.96119	6.62077	1.66106	0.850982	0.501006
GTEX-U8XE-0226-SM-4E3J3	Skin	11.451	25.6413	0.240999	24.5406	15.5506	11.1913	0.471	0.870973
GTEX-1399S-1226-SM-5J1O6	Esophagus	14.421	9.27084	0.110998	16.601	16.691	16.3113	1.79104	0.541
GTEX-WH7G-0726-SM-3NMBM	Lung	12.8411	25.9705	0.571015	22.4914	16.2312	18.9615	6.10081	2.14102
GTEX-111YS-1526-SM-5GZYW	Skin	10.7913	7.211	0.000999989	5.09083	18.1614	11.0112	1.08103	0.150998
GTEX-ZC5H-0326-SM-5HL9F	Muscle	2.66106	3.26097	0.0509985	3.97099	5.67099	2.00097	0.280992	0.141003
GTEX-13111-1226-SM-5GCNC	Stomach	3.80106	10.9109	0.0909993	8.0909	14.8008	4.76112	2.53099	0.390989
GTEX-WHSE-0011-R1A-SM-3P5ZK	Brain	6.25106	2.26106	0.000999989	5.21114	5.41102	0.571015	0.240999	0.0509985
GTEX-ZYFG-1826-SM-5GZWX	Colon	10.1113	8.32125	0.0209995	6.15091	14.811	3.74094	1.73099	0.460988
GTEX-NPJ8-2626-SM-26GMI	Brain	7.32079	1.72094	0.000999989	1.53103	7.9508	0.751008	0.231006	0.141003
GTEX-13PLJ-0005-SM-5NQ99	Blood	1.19102	2.27096	2.92108	6.49082	2.76102	5.011	0.0710018	1.06098
GTEX-14C38-1226-SM-5S2UK	Blood Vessel	6.05111	25.3304	0.000999989	20.0704	5.73105	2.39098	0.641002	0.0710018
GTEX-11GSO-1926-SM-5A5K3	Breast	5.97111	7.86093	0.0509985	24.7405	16.7014	22.6306	2.14102	0.260996
GTEX-PLZ6-1226-SM-3P5ZS	Testis	9.73108	27.3601	0.0710018	9.21127	12.2109	7.33095	2.24093	0.431012
GTEX-11ILO-0726-SM-5HL5I	Lung	13.7714	40.7803	1.25102	108.654	14.3115	39.6102	1.54104	4.65087
GTEX-ZLFU-1026-SM-5EQMZ	Esophagus	9.58116	12.4313	0.0309997	6.18083	20.2409	4.86116	1.60103	0.38101
GTEX-WZTO-0011-R11A-SM-4E3K9	Brain	6.93118	1.08103	0.000999989	0.870973	11.7111	1.141	0.231006	0.0309997
GTEX-QVJO-0011-R10A-SM-2S1QJ	Brain	6.06119	4.9909	0.000999989	4.72102	7.51097	1.52098	1.86103	0.590988
GTEX-144FL-1526-SM-5Q5CA	Pancreas	5.24085	3.3311	0.0209995	9.44074	7.2511	15.8213	2.02104	0.0509985
GTEX-13NYB-0011-R6b-SM-5MR51	Brain	4.92117	5.98106	0.0810019	1.131	5.17084	0.240999	0.471	0.0909993
GTEX-P4QT-0526-SM-2I3EX	Lung	11.9812	28.6905	0.571015	28.5417	22.8813	21.7313	4.3211	1.22103
GTEX-RU72-0011-R2A-SM-2TF6O	Brain	1.65095	1.07103	0.0309997	3.45097	3.7311	0.531006	0.231006	0.150998
GTEX-WI4N-2026-SM-4OOS7	Kidney	2.07096	0.371002	0.000999989	0.671007	0.980983	0.260996	0.0710018	0.600985
GTEX-ZZPU-0526-SM-5E44U	Lung	16.4909	19.6615	0.680987	21.8415	18.0209	21.3816	5.0711	1.27103
GTEX-PSDG-0008-SM-48TE5	Skin	31.5507	30.6009	0.061002	17.8012	15.4711	2.20106	1.38099	0.130996
GTEX-QDVN-2126-SM-5SI7X	Adipose Tissue	10.6111	10.1809	0.100998	13.0014	15.6707	13.131	0.850982	0.521016
GTEX-QLQW-1326-SM-2S1QS	Muscle	3.39097	0.950989	0.000999989	3.09106	6.68117	1.38099	0.231006	0.000999989
GTEX-WL46-0011-R6A-SM-3LK6X	Brain	4.88108	2.9011	0.0810019	3.18104	5.29085	1.17097	0.621015	0.121002
GTEX-117YX-2326-SM-5H12W	Skin	6.82108	6.50117	0.171004	6.86091	18.4916	8.36114	0.781003	0.0509985
GTEX-11P82-0926-SM-5986X	Salivary Gland	11.6608	7.08123	0.100998	12.1308	13.2113	18.1312	3.481	0.0209995
GTEX-UPK5-1226-SM-4IHL8	Esophagus	13.6507	12.3814	0.410997	24.9609	13.2113	20.9416	2.28105	0.330999
GTEX-13S7M-0005-SM-5NQ76	Blood	4.64089	6.42101	2.15099	24.0506	2.70101	13.2214	0.0509985	1.801
GTEX-PW2O-0526-SM-2I3DX	Lung	9.20106	24.8315	0.941022	26.3604	16.6413	22.7217	3.12098	1.35097
GTEX-11EI6-2226-SM-5EGJM	Testis	9.811	5.20104	0.100998	2.62097	6.01098	3.43093	2.94099	0.0509985
GTEX-139YR-2726-SM-5K7VV	Blood Vessel	6.12114	17.2712	0.000999989	8.75071	7.08123	1.801	0.680987	0.0209995
GTEX-OXRK-0226-SM-3NB2G	Skin	8.9507	5.52089	0.0710018	7.41116	17.5914	11.521	0.66099	0.231006
GTEX-11TUW-2226-SM-5EQL9	Testis	5.63103	4.45091	0.0209995	2.68105	6.11096	1.61105	2.86096	0.0509985
GTEX-O5YT-0726-SM-3MJHA	Esophagus	11.6608	15.2011	0.0209995	11.5506	19.3908	6.7309	1.63105	0.100998
GTEX-XMK1-1326-SM-4B65Q	Esophagus	12.8313	7.66083	0.141003	15.3408	10.3009	13.5011	2.72093	1.19102
GTEX-13111-0326-SM-5DUXF	Adrenal Gland	8.16074	19.1411	0.190994	4.61106	7.94089	3.43093	2.65093	0.240999
GTEX-13OVI-2726-SM-5KM56	Skin	8.50081	8.21124	0.0509985	12.9107	16.6413	11.2707	0.721014	0.130996
GTEX-14753-0011-R6b-SM-5S2UD	Brain	0.371002	0.970971	0.000999989	0.271007	0.630995	0.0109996	0.141003	0.0209995
GTEX-13IVO-0011-R8a-SM-5L3DY	Brain	2.40094	2.9709	0.0410009	6.23116	2.75108	0.431012	0.160996	0.000999989
GTEX-ZAB4-0726-SM-5HL8I	Blood Vessel	8.29074	17.0808	0.0309997	12.0512	11.7607	5.59098	1.63105	0.531006
GTEX-132Q8-0011-R5a-SM-5IJDM	Brain	5.41102	9.09075	0.0410009	4.6709	6.15091	1.68098	0.371002	0.0710018
GTEX-ZQG8-1126-SM-51MRL	Vagina	9.84097	10.7809	0.061002	11.6213	14.1615	10.9708	0.941022	0.0209995
GTEX-1211K-2226-SM-5FQU6	Adipose Tissue	10.5707	24.6514	0.000999989	17.171	21.9204	20.7609	1.00097	0.0309997
GTEX-ZF29-0826-SM-5S2NP	Adipose Tissue	9.97074	12.9807	0.271007	19.641	19.8711	13.2811	2.88106	0.38101
GTEX-T6MN-0011-R4A-SM-5CHSD	Brain	0.000999989	0.000999989	0.000999989	0.000999989	0.000999989	0.000999989	0.000999989	0.000999989
GTEX-YECK-1926-SM-4W21H	Liver	2.63098	4.61106	0.571015	3.26097	7.41116	1.12101	0.801014	0.220997
GTEX-13X6K-0011-R2b-SM-5P9K3	Brain	3.54111	3.97099	0.000999989	5.34096	5.35097	1.65095	0.891002	0.181005
GTEX-YJ8O-0326-SM-5RQJW	Esophagus	6.34095	6.77115	0.0710018	8.52087	10.1809	7.08123	1.45095	0.110998
GTEX-RWSA-0126-SM-2XCBB	Skin	8.9012	13.4106	0.190994	5.34096	23.6112	10.0708	1.211	1.10099
GTEX-TKQ1-0426-SM-4DXT4	Esophagus	11.541	11.1009	0.0509985	5.43093	19.5514	6.84097	1.17097	0.401007
GTEX-13O61-2126-SM-5IJEO	Pancreas	2.78099	1.61105	0.0710018	4.98088	6.05111	6.66082	0.740977	0.0309997
GTEX-XUW1-1126-SM-4BONZ	Blood Vessel	11.9513	25.5509	0.171004	18.8305	19.9207	9.39114	2.34096	0.441015
GTEX-145MG-3026-SM-5RQJA	Brain	4.51085	2.51107	0.171004	1.25102	5.51095	0.491002	0.210998	0.000999989
GTEX-X4XX-0726-SM-4QARS	Testis	6.98084	8.4908	0.0309997	5.73105	12.961	6.84097	0.740977	0.0309997
GTEX-14A5I-1726-SM-5QGQ5	Liver	3.63108	4.26102	0.061002	2.33092	10.1113	0.701007	0.621015	0.000999989
GTEX-13QBU-1326-SM-5LU4K	Adipose Tissue	9.89089	22.6604	0.130996	32.4602	24.3812	11.161	0.761017	0.561011
GTEX-OHPL-0426-SM-3TW8X	Blood Vessel	14.461	12.2712	0.0509985	8.45087	13.2315	3.0409	0.491002	0.061002
GTEX-13OVH-3126-SM-5MR4Z	Pituitary	7.6412	5.16118	0.0209995	4.55105	13.2012	1.87099	0.34099	0.150998
GTEX-13O1R-0826-SM-5J2MB	Thyroid	10.2909	24.6617	0.410997	23.3314	24.9315	23.2507	2.20106	0.231006
GTEX-ZTPG-2226-SM-57WF9	Vagina	5.83082	18.4008	0.171004	16.691	9.91079	6.61114	6.3612	0.150998
GTEX-ZAB4-0011-R9a-SM-4SOKG	Brain	3.28092	2.07096	0.121002	4.29096	4.31093	2.09101	1.96101	0.0810019
GTEX-WVLH-3026-SM-3MJG9	Brain	4.00111	2.41095	0.0410009	1.17097	3.80106	0.521016	0.160996	0.0410009
GTEX-R55G-2326-SM-2TC61	Muscle	6.77115	1.64103	0.000999989	2.52101	6.09109	0.861009	0.150998	0.000999989
GTEX-13O3O-0011-R5b-SM-5KM44	Brain	3.03101	1.62102	0.0209995	2.39098	4.85106	0.121002	0.100998	0.0209995
GTEX-13OVJ-0011-R5a-SM-5P9H7	Brain	3.12098	6.34095	0.000999989	17.6207	5.76092	1.41098	0.451	0.371002
GTEX-PSDG-0526-SM-2S1OH	Blood Vessel	5.66117	13.871	0.000999989	5.58091	16.5608	1.58096	1.63105	0.0509985
GTEX-ZF29-0926-SM-4WKFZ	Skin	12.7013	7.97122	0.0410009	4.80088	20.8504	9.1413	1.02101	0.561011
GTEX-POYW-0426-SM-2XCEV	Nerve	7.33095	20.8605	0.280992	23.3007	14.1409	5.20104	1.17097	0.141003
GTEX-R55D-0008-SM-48FEV	Skin	16.3215	43.8104	0.000999989	8.28097	12.9807	1.59096	4.54097	0.000999989
GTEX-13X6K-0011-R11a-SM-5P9F5	Brain	6.79089	1.18099	0.000999989	1.241	15.8609	2.161	0.521016	0.0309997
GTEX-S3XE-1926-SM-3K2B3	Nerve	8.50081	14.7506	0.0309997	14.941	16.0111	5.65098	0.901001	0.0710018
GTEX-WYJK-0426-SM-3NM9G	Blood Vessel	7.79095	15.6306	0.000999989	3.16104	20.4213	1.48103	0.431012	0.0509985
GTEX-WFG8-0826-SM-4LVN5	Blood Vessel	13.4711	13.5611	0.110998	14.7006	16.0812	9.10084	2.19102	0.0909993
GTEX-Y8E4-0226-SM-4VBQ3	Blood Vessel	11.0013	17.5014	0.201005	10.9511	13.3207	7.99113	2.32093	0.231006
GTEX-YFC4-0226-SM-57WD2	Adipose Tissue	8.22092	11.2707	0.251007	23.8712	16.3215	17.2115	3.79106	0.210998
GTEX-WH7G-0426-SM-3NMBJ	Heart	4.2009	2.741	0.0309997	2.75108	4.81088	3.18104	0.371002	0.311003
GTEX-13O3P-0726-SM-5J2OM	Thyroid	5.19096	17.6415	0.220997	28.3701	14.3811	23.1413	1.75103	0.280992
GTEX-WH7G-1026-SM-4LVML	Esophagus	11.7411	10.0708	0.100998	5.55082	16.1415	3.42096	1.20097	0.300993
GTEX-11PRG-2826-SM-5BC54	Brain	5.28096	1.131	0.000999989	0.701007	18.1513	1.46104	0.311003	0.0410009
GTEX-ZDTS-0826-SM-4WKHL	Skin	8.00111	12.9412	0.0309997	6.33085	12.0712	8.89072	0.66099	2.06094
GTEX-P44G-0011-R1A-SM-2I3FE	Brain	4.03089	3.60101	0.000999989	5.22091	5.99101	0.141003	0.0710018	0.000999989
GTEX-QLQ7-1726-SM-2S1QQ	Muscle	2.49096	2.06094	0.000999989	2.51107	5.13086	1.86103	0.220997	0.000999989
GTEX-YEC3-0526-SM-4YCF2	Blood Vessel	11.151	19.2515	0.66099	13.6006	16.8713	7.18108	1.79104	0.721014
GTEX-ZAB5-2326-SM-5IJFR	Salivary Gland	16.9404	12.7013	0.150998	26.8509	13.2811	18.3512	1.81102	3.21095
GTEX-ZGAY-1126-SM-4WWBS	Esophagus	14.4711	11.1409	0.571015	11.2808	13.7409	15.9513	5.58091	2.12093
GTEX-PWCY-0826-SM-48TCR	Esophagus	10.4512	7.211	0.0410009	5.60106	18.0609	4.53091	1.27103	0.121002
GTEX-13JUV-0626-SM-5J1MQ	Adipose Tissue	7.0411	13.0213	0.171004	38.7305	15.5312	7.32079	2.22099	0.181005
GTEX-R53T-0226-SM-48FEH	Adrenal Gland	18.1513	17.9411	0.061002	6.641	10.5013	2.15099	4.00111	1.91096
GTEX-11EQ8-0926-SM-5H12V	Skin	4.59097	23.4806	0.460988	5.3811	15.7513	6.641	1.07103	8.89072
GTEX-11H98-0426-SM-5HL55	Nerve	7.27123	22.8212	0.000999989	9.1413	13.5808	8.24089	1.72094	1.31103
GTEX-13QIC-3026-SM-5LU58	Brain	5.75095	1.41098	0.0909993	1.72094	12.3206	1.25102	0.171004	0.000999989
GTEX-QMRM-0008-SM-447B1	Skin	29.0708	48.722	0.000999989	7.18108	22.5804	4.19102	13.0312	0.000999989
GTEX-WYJK-1026-SM-3NM8W	Heart	3.77088	3.01091	0.0509985	3.7311	5.17084	3.44093	0.201005	0.231006
GTEX-YECK-0926-SM-4W214	Lung	5.0711	36.3504	0.801014	34.1899	9.7913	10.431	1.60103	1.06098
GTEX-S4Z8-0226-SM-4AD5K	Spleen	15.3206	12.4511	2.47101	49.6596	17.7814	29.8012	1.48103	4.37111
GTEX-111FC-0626-SM-5N9CU	Heart	4.81088	6.98084	0.100998	5.75095	5.84094	4.74103	1.27103	0.061002
GTEX-WL46-0726-SM-3LK5Z	Heart	2.55107	9.30109	0.0209995	7.82125	7.09105	4.13103	1.34099	0.361007
GTEX-12WSC-0011-R10a-SM-5GU57	Brain	4.22104	1.17097	0.000999989	1.551	2.00097	0.580996	0.181005	0.110998
GTEX-X4LF-0526-SM-3NMB6	Lung	9.27084	14.9006	0.541	32.3614	24.0306	33.57	2.81103	1.04102
GTEX-131XE-0326-SM-5LZVO	Liver	6.67099	5.29085	0.251007	14.5314	8.96125	3.81108	0.740977	0.291002
GTEX-YECK-0326-SM-4W1YS	Skin	6.48093	17.9014	0.0209995	4.11103	13.7209	9.55132	1.32097	3.29094
GTEX-X5EB-0826-SM-46MVS	Heart	10.6413	10.1711	0.000999989	25.2603	16.4909	29.192	0.801014	0.861009
GTEX-12WSE-0826-SM-5S2VL	Lung	5.70094	72.933	2.9011	56.9293	15.9812	25.3006	5.63103	25.6218
GTEX-WRHK-0001-SM-4WWDD	Blood	14.0715	83.3783	0.000999989	11.4209	4.64089	11.0311	0.100998	84.5891
GTEX-POYW-1226-SM-5LU5O	Lung	8.96125	42.6803	0.910986	44.3911	14.3711	18.3906	2.50099	1.50098
GTEX-ZDYS-0526-SM-5L3EE	Blood Vessel	13.141	16.3906	0.0810019	9.6311	14.6406	2.77099	1.31103	0.0810019
GTEX-ZYT6-0826-SM-5E43I	Blood Vessel	7.15078	29.5012	0.0209995	16.8106	12.9906	5.95087	2.86096	0.571015
GTEX-PVOW-0726-SM-2XCF5	Blood Vessel	5.6209	33.0413	0.000999989	3.82113	13.7809	0.941022	2.29104	0.0509985
GTEX-X4XY-0006-SM-46MV2	Blood	3.77088	7.9211	1.82096	18.0109	3.19098	9.5712	0.0810019	2.20106
GTEX-WK11-2726-SM-3NMAQ	Skin	7.35079	21.4217	0.130996	7.57108	15.4314	11.051	1.31103	3.75106
GTEX-13G51-0011-R1a-SM-5LZYR	Brain	6.08096	4.97088	0.061002	2.02104	4.19102	1.62102	1.08103	0.0710018
GTEX-13OVL-0011-R1a-SM-5L3H5	Brain	3.98091	2.50099	0.0509985	1.84101	3.58109	0.680987	0.441015	0.000999989
GTEX-PX3G-1026-SM-48TZW	Pancreas	2.98101	1.551	0.0909993	5.42115	4.77103	4.77103	0.781003	0.061002
GTEX-13RTJ-2226-SM-5S2Q1	Kidney	7.7109	6.7309	0.0509985	12.0612	8.24089	8.45087	1.36103	0.901001
GTEX-O5YW-0526-SM-2YUMX	Lung	8.32125	23.5818	0.410997	14.8614	19.1716	12.711	7.08123	0.35099
GTEX-R53T-1126-SM-48FD4	Esophagus	13.091	8.43098	0.811015	16.7107	13.7513	14.0306	5.10107	0.0309997
GTEX-QDT8-0011-R9A-SM-32PKH	Brain	3.15098	5.57086	0.000999989	6.57094	5.6209	3.22098	3.55094	0.181005
GTEX-11EQ9-2226-SM-5987H	Blood Vessel	9.7412	11.0211	0.000999989	4.22104	18.341	2.52101	0.680987	0.000999989
GTEX-13IVO-0726-SM-5LZYV	Skin	7.19104	6.16115	0.000999989	4.80088	13.981	8.47081	2.38105	0.580996
GTEX-ZE9C-2826-SM-5S2MO	Adipose Tissue	5.87097	19.8807	0.100998	48.3519	11.2107	17.5914	5.52089	0.480997
GTEX-12ZZZ-0226-SM-59HKU	Muscle	4.64089	2.59098	0.061002	2.57095	3.51104	1.09104	0.110998	0.0909993
GTEX-13PVQ-0326-SM-5K7YF	Muscle	0.980983	1.131	0.000999989	2.76102	4.77103	1.86103	0.0410009	0.0710018
GTEX-OHPL-0526-SM-4M1XS	Lung	13.4208	27.9912	0.471	33.8715	18.2611	17.3709	4.10107	1.27103
GTEX-1313W-0011-R2a-SM-5EGLF	Brain	4.16091	1.67099	0.0909993	2.02104	2.75108	1.44103	0.501006	0.160996
GTEX-13QIC-1426-SM-5LU4V	Nerve	7.91122	18.7212	0.0710018	13.3512	13.8912	5.08096	1.98096	0.000999989
GTEX-N7MS-0011-R2a-SM-2HML6	Brain	4.96089	0.801014	0.0710018	3.75106	3.28092	1.83096	0.66099	0.201005
GTEX-QDT8-0011-R9A-SM-5SI8J	Brain	3.45097	3.18104	0.0710018	6.53098	5.00094	3.46103	2.71095	0.100998
GTEX-132AR-2726-SM-5PNVN	Colon	15.661	18.9615	1.211	15.6805	15.2612	25.1415	9.51102	0.130996
GTEX-13N2G-0226-SM-5K7VF	Skin	11.5306	16.2605	0.110998	13.141	18.8514	17.8308	2.05096	0.000999989
GTEX-13OW6-0011-R5a-SM-5O9BK	Brain	3.47112	5.92083	0.061002	1.71095	5.20104	0.880992	1.02101	0.141003
GTEX-VUSG-1226-SM-4KKZF	Esophagus	9.59112	8.99111	0.371002	20.2605	9.82121	17.1009	3.43093	0.501006
GTEX-QLQW-0326-SM-447A8	Pancreas	2.15099	1.20097	0.0209995	4.56116	6.16115	5.23105	0.710989	0.0209995
GTEX-13NZA-0126-SM-5K7UH	Adipose Tissue	8.93087	8.63083	0.201005	22.7312	15.3312	18.3512	1.61105	1.03097
GTEX-YEC4-1026-SM-5P9FW	Esophagus	10.0109	5.11098	0.141003	13.4814	15.4207	20.7106	2.31097	0.480997
GTEX-ZPIC-0002-SM-4WWEC	Blood	20.0412	74.2799	0.491002	13.7914	5.05111	10.3611	0.0810019	64.7496
GTEX-X4XY-0226-SM-4E3IZ	Skin	5.44111	14.431	0.0509985	7.57108	14.7905	9.52091	0.751008	0.421002
GTEX-XUJ4-0326-SM-4BOP9	Blood Vessel	10.1711	9.54073	0.0710018	9.75134	14.721	1.26103	0.401007	0.000999989
GTEX-13N1W-0011-R9b-SM-5MR4R	Brain	8.32125	1.131	0.210998	14.9306	4.90108	1.72094	0.410997	0.0509985
GTEX-ZDYS-2126-SM-5S2OD	Adipose Tissue	9.8008	11.631	0.0810019	11.4209	15.3408	10.7809	2.00097	0.000999989
GTEX-11DYG-1226-SM-5N9DC	Blood Vessel	5.47098	15.4914	0.0909993	8.82074	5.81105	0.740977	0.561011	0.431012
GTEX-S4UY-1026-SM-4AD53	Ovary	10.6708	9.55132	0.181005	13.4413	15.0209	16.9006	1.53103	0.0909993
GTEX-ZTSS-0005-SM-4YCDR	Blood	19.9608	9.15081	0.271007	31.601	7.28082	14.9306	0.0109996	0.541
GTEX-13NYB-0011-R2a-SM-5MR3C	Brain	3.93101	2.27096	0.121002	5.25103	3.87098	2.46092	1.66106	0.521016
GTEX-XAJ8-1126-SM-47JYA	Nerve	9.86077	14.191	0.061002	15.5614	20.1513	9.36124	1.04102	0.110998
GTEX-Y114-0002-SM-4TT78	Blood	21.3003	43.6921	0.0309997	5.71083	6.67099	10.581	0.000999989	32.3815
GTEX-ZV68-0011-R2a-SM-4YCDK	Brain	1.34099	1.87099	0.0710018	3.88092	1.59096	0.210998	0.141003	0.0509985
GTEX-111FC-1926-SM-5GZYC	Testis	6.27102	4.17102	0.000999989	2.00097	5.74099	2.63098	5.98106	0.0710018
GTEX-XUJ4-0626-SM-4BOOO	Heart	3.95095	3.05104	0.0209995	4.22104	4.59097	1.49102	0.761017	0.0309997
GTEX-ZLV1-1226-SM-4WWBX	Colon	11.521	11.241	0.311003	14.3313	15.9911	33.9514	3.44093	0.240999
GTEX-SJXC-0005-SM-2XCE7	Blood	1.20097	1.22103	1.02101	6.39082	2.20106	7.81096	0.0209995	3.06099
GTEX-XOT4-1426-SM-4B65T	Lung	5.14083	55.8815	1.77104	78.401	7.68103	12.4909	1.87099	7.36099
GTEX-11DXX-2626-SM-5Q5A3	Blood Vessel	11.561	13.271	0.000999989	7.52087	17.1805	1.07103	0.730978	0.0309997
GTEX-Y5V6-2626-SM-5IFIX	Muscle	3.63108	0.491002	0.000999989	1.07103	3.51104	0.880992	0.0710018	0.0209995
GTEX-11ONC-2026-SM-5HL61	Colon	5.50102	24.761	0.0710018	11.1711	8.71077	6.3612	2.18102	0.100998
GTEX-QDT8-0226-SM-32PL4	Adipose Tissue	7.15078	14.811	0.000999989	22.4711	21.3505	28.3918	1.70102	0.550991
GTEX-TMZS-0126-SM-3DB9Q	Skin	6.56093	3.64091	0.130996	6.04105	15.5711	10.9511	0.550991	2.08103
GTEX-WH7G-1626-SM-4LVMY	Small Intestine	10.9914	11.7909	0.571015	23.7211	17.7716	29.0607	0.821026	3.9611
GTEX-13FHP-0126-SM-5IJBG	Skin	13.5011	5.79095	0.0209995	5.20104	16.2605	12.3711	0.891002	0.371002
GTEX-U8XE-0926-SM-3DB8V	Heart	2.81103	5.70094	0.171004	9.97074	5.54082	3.81108	0.541	0.0909993
GTEX-Z9EW-0826-SM-5HL9T	Adipose Tissue	5.70094	5.48085	0.0909993	20.6004	18.081	9.35087	1.20097	3.63108
GTEX-U8XE-0726-SM-3DB8O	Muscle	2.13095	1.53103	0.000999989	4.71089	9.42113	0.401007	0.0710018	0.171004
GTEX-SN8G-0226-SM-4DM6B	Adipose Tissue	8.91108	17.4409	0.000999989	23.5916	25.2708	21.5617	1.78102	0.980983
GTEX-132QS-0426-SM-5KLZ6	Heart	3.9611	2.02104	0.0309997	2.63098	5.16118	2.9709	0.210998	0.231006
GTEX-U3ZM-0526-SM-4DXTB	Esophagus	11.0609	9.3308	0.0909993	14.3711	14.9109	15.4507	3.78108	1.25102
GTEX-Y114-0326-SM-4TT99	Blood Vessel	9.64112	15.6914	0.0509985	9.47089	15.5108	5.4009	1.23097	0.34099
GTEX-11TUW-1726-SM-5BC5C	Liver	6.23116	4.13103	0.210998	23.2313	9.03109	0.650987	0.171004	0.000999989
GTEX-139T6-0426-SM-5IJEM	Lung	14.5113	26.6618	0.231006	28.1605	19.2315	27.7209	3.42096	0.590988
GTEX-13QBU-0126-SM-5LU3V	Blood Vessel	9.69069	19.0405	0.110998	21.1004	17.7814	11.4407	0.901001	0.210998
GTEX-PLZ6-0526-SM-3P61C	Esophagus	9.59112	7.55117	0.141003	10.1211	11.4114	16.9006	3.45097	0.300993
GTEX-RTLS-0426-SM-2TF5K	Blood Vessel	5.10107	24.761	0.000999989	5.89095	17.6611	2.06094	1.70102	0.0509985
GTEX-Y3IK-1226-SM-4WWEK	Esophagus	9.72097	14.5113	0.0810019	11.051	10.2007	5.11098	2.12093	0.330999
GTEX-R55F-0008-SM-48FE6	Skin	29.0607	41.2608	0.000999989	13.071	10.4911	0.0810019	0.811015	0.491002
GTEX-13OVJ-0926-SM-5K7U1	Adipose Tissue	6.54095	11.891	0.0410009	21.1414	17.2808	20.8417	1.06098	0.181005
GTEX-13PVQ-1026-SM-5KM3M	Breast	4.93107	10.9807	0.0509985	34.7611	25.3814	7.76077	0.621015	0.260996
GTEX-113IC-0526-SM-5HL76	Nerve	12.6907	20.2016	0.721014	15.9005	17.0004	10.3109	3.4011	0.35099
GTEX-PWCY-2026-SM-2S1NF	Muscle	1.96101	0.821026	0.000999989	0.361007	5.11098	0.460988	0.190994	0.000999989
GTEX-11WQK-0726-SM-5GU71	Muscle	1.43098	1.82096	0.000999989	5.60106	3.95095	1.43098	0.0810019	0.160996
GTEX-TMMY-0926-SM-4TT1Z	Lung	5.95087	22.9417	0.201005	20.2704	18.2307	14.5909	3.16104	1.18099
GTEX-11EQ9-2126-SM-5PNVW	Muscle	6.63088	1.11103	0.000999989	1.42099	7.61107	1.73099	0.210998	0.000999989
GTEX-T5JW-0003-SM-3NMAD	Blood	17.1412	69.6523	0.0309997	4.7509	5.12091	6.34095	0.0509985	129.598
GTEX-WRHU-0826-SM-3MJFN	Muscle	3.07098	3.98091	0.0109996	2.02104	4.16091	1.59096	0.38101	0.0309997
GTEX-14C5O-1726-SM-5RQI9	Esophagus	7.52087	12.0712	0.000999989	18.6512	9.52091	5.73105	1.17097	0.0509985
GTEX-VJYA-1926-SM-3GIJJ	Muscle	4.28086	2.37101	0.000999989	5.20104	7.85113	3.02095	0.000999989	0.000999989
GTEX-ZVZQ-0426-SM-59HLT	Adipose Tissue	8.93087	13.6308	0.0410009	7.211	21.4009	11.9812	1.941	1.471
GTEX-OIZG-0008-SM-4E3J2	Skin	31.8517	36.6515	0.000999989	12.6013	14.1007	2.66106	2.76102	0.000999989
GTEX-11VI4-0626-SM-5EQLO	Esophagus	11.451	7.81096	0.0209995	6.06119	13.3106	5.63103	1.54104	0.330999
GTEX-WHSB-0526-SM-4M1XM	Esophagus	8.72104	12.5612	0.190994	4.70111	16.0912	4.69101	0.980983	0.130996
GTEX-11EQ8-0826-SM-5N9FG	Thyroid	8.72104	10.6413	3.56104	26.4611	18.6215	21.441	2.49096	0.630995
GTEX-QVJO-1826-SM-447C9	Breast	8.38087	17.8308	0.0909993	25.5402	13.271	13.7209	2.85106	0.100998
GTEX-145MH-2926-SM-5Q5D2	Brain	8.46083	0.650987	0.000999989	1.00097	11.3814	0.66099	0.100998	0.130996
GTEX-12584-0226-SM-5EQL5	Adipose Tissue	7.55117	10.3209	0.061002	26.8807	17.5111	13.431	2.24093	0.121002
GTEX-13RTJ-0011-R7b-SM-5P9JS	Brain	5.68082	3.64091	0.000999989	3.46103	5.02109	0.821026	0.431012	0.0209995
GTEX-14C39-2526-SM-5S2UH	Adipose Tissue	10.351	10.0708	0.0710018	21.8809	21.6711	17.5306	1.241	0.260996
GTEX-V1D1-0326-SM-4JBIY	Blood Vessel	12.6214	16.5207	1.211	19.8505	16.0611	20.451	1.69103	1.67099
GTEX-OXRN-0126-SM-48TDM	Skin	10.5912	13.981	0.0810019	9.91079	16.6714	12.9708	1.78102	0.710989
GTEX-S4P3-0526-SM-4AD58	Esophagus	11.331	15.711	0.0810019	5.6209	12.4407	4.60085	2.47101	0.061002
GTEX-1313W-0011-R10b-SM-5DUXA	Brain	5.41102	1.38099	0.000999989	1.02101	2.88106	0.311003	0.260996	0.130996
GTEX-13OVI-0526-SM-5IFFQ	Pancreas	2.70101	1.18099	0.000999989	6.02099	6.51109	4.4611	1.16103	0.0209995
GTEX-WWYW-0005-SM-3NB3K	Blood	2.85106	0.891002	0.710989	15.4711	1.09104	4.55105	0.0509985	1.01101
GTEX-ZC5H-2226-SM-4WAWS	Vagina	6.99101	24.181	0.781003	22.5804	15.1411	25.1816	5.57086	0.141003
GTEX-12WSG-1026-SM-5EGII	Pancreas	1.93094	0.910986	0.061002	3.17092	3.60101	2.75108	0.260996	0.0209995
GTEX-NPJ8-1326-SM-3LK6B	Blood Vessel	10.0012	22.4105	0.410997	17.8704	13.4609	6.82108	2.15099	0.000999989
GTEX-WHSE-1626-SM-4M1XL	Esophagus	5.04097	17.7408	0.000999989	16.1113	17.6012	13.161	1.131	0.000999989
GTEX-139TT-2126-SM-5LZWC	Skin	12.0712	18.1513	0.300993	7.91122	17.2605	14.091	1.28103	1.15101
GTEX-12584-0426-SM-5FQTT	Blood Vessel	6.41078	25.9201	0.0309997	12.3908	8.82074	1.33099	0.671007	0.0710018
GTEX-P4PQ-0426-SM-3NMCI	Blood Vessel	13.2608	9.95071	0.0909993	14.811	15.9314	2.34096	0.950989	0.471
GTEX-148VJ-0726-SM-5LU8J	Thyroid	2.64103	21.1209	0.280992	17.4905	23.6407	33.8715	0.410997	0.240999
GTEX-ZYT6-2326-SM-5GZY3	Skin	14.191	13.0412	0.061002	5.47098	17.0406	12.4407	1.29101	1.84101
GTEX-13FLV-0011-R3b-SM-5LZYP	Brain	2.33092	6.01098	0.0209995	15.5312	4.22104	0.130996	0.260996	0.0710018
GTEX-ZT9W-2226-SM-57WFU	Testis	7.35079	6.84097	0.061002	1.241	5.83082	2.95099	5.67099	0.061002
GTEX-111CU-1526-SM-5N9FS	Prostate	11.0311	16.8912	0.190994	13.0114	16.4612	3.74094	1.471	0.34099
GTEX-13G51-0011-R7b-SM-5LZXG	Brain	3.89089	4.11103	0.0209995	0.880992	2.99094	0.390989	0.141003	0.000999989
GTEX-S33H-2426-SM-2XCB2	Blood Vessel	7.73124	26.231	0.000999989	10.1008	17.4711	2.32093	3.13095	0.0309997
GTEX-12WSN-1326-SM-5GCNT	Breast	10.9511	6.1309	0.150998	20.4609	15.6512	17.561	0.531006	0.0710018
GTEX-X585-0011-R5A-SM-46MVI	Brain	6.79089	4.14106	0.0309997	6.59101	8.25118	3.78108	1.56103	0.531006
GTEX-N7MT-0326-SM-48TDP	Esophagus	10.341	9.86077	0.181005	22.2217	14.5707	24.2011	4.331	0.0810019
GTEX-1399T-0426-SM-5PNVJ	Heart	0.600985	1.46104	0.061002	1.211	1.37097	1.50098	0.150998	0.190994
GTEX-12WSE-0011-R7a-SM-5PNWF	Brain	0.701007	0.830988	0.0309997	0.240999	0.910986	0.0710018	0.100998	0.000999989
GTEX-13CF3-1826-SM-5J1NK	Muscle	4.01111	1.37097	0.000999989	2.43092	7.15078	1.70102	0.201005	0.0410009
GTEX-139UW-0126-SM-5KM1B	Thyroid	8.85075	18.1111	0.150998	13.7513	17.5208	23.7409	1.08103	0.460988
GTEX-14753-0426-SM-5NQAM	Skin	10.0109	6.10081	0.0410009	7.24106	17.3408	10.4208	0.580996	0.901001
GTEX-13N11-1726-SM-5J1OJ	Breast	11.3609	19.9014	0.121002	16.8912	18.871	11.8113	1.98096	0.390989
GTEX-PVOW-0426-SM-5MR5R	Heart	1.801	3.72102	0.121002	3.47112	3.4011	2.25105	0.361007	0.32099
GTEX-11TT1-0126-SM-5LUAA	Adrenal Gland	17.2904	29.9919	0.0309997	6.53098	9.7412	0.521016	8.58073	0.680987
GTEX-13O3O-0826-SM-5K7WE	Breast	7.44102	31.0603	0.0509985	10.2411	13.0114	6.38108	1.64103	0.371002
GTEX-U3ZM-1626-SM-4DXSK	Testis	8.201	5.22091	0.0309997	1.85099	7.48084	4.10107	3.99114	0.220997
GTEX-13N2G-0011-R6b-SM-5MR3P	Brain	6.21089	3.9611	0.410997	2.18102	6.1309	0.621015	0.610981	0.201005
GTEX-145LT-1926-SM-5QGP5	Nerve	7.32079	17.8915	0.000999989	21.1913	14.5213	8.52087	1.141	0.0710018
GTEX-ZA64-1626-SM-5CVME	Testis	8.60097	3.9109	0.000999989	1.70102	5.50102	1.73099	2.80092	0.100998
GTEX-R55E-1126-SM-48FDZ	Blood Vessel	7.87074	12.8207	0.0309997	12.2109	11.8113	2.70101	0.801014	0.401007
GTEX-144GL-2026-SM-5LU3O	Breast	8.30109	27.4608	0.190994	15.2412	18.3512	11.9009	5.61116	0.751008
GTEX-12WSE-0011-R1b-SM-5GU4V	Brain	2.86096	1.33099	0.000999989	0.941022	3.71098	0.451	0.160996	0.0309997
GTEX-144GL-0226-SM-5QGOX	Adipose Tissue	9.5712	27.7113	0.291002	11.521	19.9304	13.5114	3.87098	0.171004
GTEX-SIU8-0008-SM-4BRUC	Skin	29.5708	69.1425	0.000999989	8.4808	24.3711	6.32121	9.6311	0.181005
GTEX-UTHO-0426-SM-5SI7N	Adipose Tissue	11.1009	22.521	0.000999989	16.601	17.8308	12.4011	1.12101	0.000999989
GTEX-SNOS-0326-SM-4DM6C	Blood Vessel	17.9511	18.5109	0.0710018	17.0606	22.0912	3.55094	1.76101	0.251007
GTEX-T6MN-0726-SM-32PML	Breast	10.1809	23.8811	0.110998	12.2406	24.8918	29.1717	3.51104	0.401007
GTEX-S341-0006-SM-3NM8D	Blood	13.5808	2.57095	0.0209995	10.751	3.9611	13.7914	0.0109996	0.431012
GTEX-132NY-1026-SM-5P9IY	Thyroid	8.06123	18.4213	0.38101	19.7407	14.2313	35.8102	1.96101	0.300993
GTEX-Q2AH-0005-SM-5SI7G	Blood	20.9314	2.64103	0.190994	23.1013	4.34092	31.98	0.000999989	0.550991
GTEX-UPIC-0326-SM-4IHJ9	Blood Vessel	10.9914	14.2907	0.061002	5.15117	20.2914	5.12091	0.790973	0.0909993
GTEX-1313W-0326-SM-5LZU5	Nerve	9.3308	14.3512	0.0509985	15.0908	14.3214	5.06092	2.05096	0.0309997
GTEX-WEY5-0626-SM-4LMIA	Ovary	8.11111	26.8007	0.000999989	13.4013	21.4916	6.44107	1.99101	0.141003
GTEX-ZXG5-2126-SM-59HKD	Skin	10.5013	8.77075	0.061002	5.39118	15.9314	8.23118	1.23097	0.491002
GTEX-147F3-0526-SM-5SI98	Skin	7.85113	9.7608	0.0209995	8.59085	22.5117	17.4312	0.550991	1.29101
GTEX-PX3G-0226-SM-2S1OU	Adipose Tissue	10.751	9.44074	0.451	26.7914	23.7804	23.7804	4.331	0.361007
GTEX-11ZUS-2126-SM-5N9E6	Prostate	4.9909	10.4708	0.0810019	14.3711	11.6108	5.92083	1.801	0.110998
GTEX-WHWD-0005-SM-3LK7D	Blood	22.7611	13.5611	0.300993	55.7693	9.06119	31.1314	0.000999989	4.03089
GTEX-13NYB-0626-SM-5MR47	Lung	7.66083	48.2715	1.67099	23.901	8.77075	6.76083	1.44103	3.97099
GTEX-S7SF-0626-SM-4AD4V	Stomach	14.671	6.76083	0.401007	11.7208	17.971	11.8713	2.37101	0.240999
GTEX-14AS3-1526-SM-5Q5ED	Skin	13.8912	9.3308	0.171004	5.84094	20.051	10.5013	1.04102	0.790973
GTEX-Y114-0226-SM-4TT8W	Heart	3.09106	1.75103	0.000999989	1.79104	3.26097	0.93103	0.220997	0.141003
GTEX-111YS-2226-SM-5987P	Blood Vessel	9.96107	15.9115	0.0710018	8.40123	16.2515	4.42108	0.641002	0.0410009
GTEX-13IVO-0426-SM-5LZY7	Nerve	11.241	12.2008	0.110998	12.5412	16.2009	5.011	2.20106	0.0410009
GTEX-R53T-0005-SM-3GADK	Blood	12.2814	6.43081	0.421002	12.6013	4.87094	9.97074	0.100998	2.49096
GTEX-RU72-0526-SM-2TF5Z	Lung	4.07105	66.4916	5.21114	73.0291	10.6008	25.0112	1.75103	2.94099
GTEX-XV7Q-1626-SM-4BRWC	Vagina	11.291	25.0008	0.580996	23.3217	9.37098	15.3015	4.36112	0.35099
GTEX-QCQG-0006-SM-5SI8M	Blood	38.8112	18.6616	0.571015	55.5417	17.6109	67.4291	0.0710018	1.30098
GTEX-QMRM-0926-SM-447BR	Esophagus	11.1009	5.64119	0.0710018	5.76092	13.801	5.77091	1.74098	0.141003
GTEX-R55G-1626-SM-48FF4	Uterus	19.5406	27.5905	0.000999989	8.11111	15.1306	3.81108	3.64091	0.0909993
GTEX-11OF3-2526-SM-5P9JL	Muscle	4.73085	0.880992	0.0209995	1.29101	3.05104	1.211	0.160996	0.0209995
GTEX-145MN-0326-SM-5QGQI	Kidney	17.401	7.03085	0.061002	7.44102	14.3512	8.89072	3.57093	2.11096
GTEX-YFC4-0011-R10a-SM-4SOK5	Brain	5.15117	3.99114	0.000999989	2.22099	4.52087	0.431012	0.231006	0.0410009
GTEX-XGQ4-1626-SM-4AT6J	Esophagus	8.96125	8.74101	0.0710018	5.29085	15.5409	5.4009	1.131	0.0410009
GTEX-XV7Q-1726-SM-4BRUU	Adipose Tissue	10.6111	14.1213	0.061002	13.8614	10.9511	5.58091	3.80106	0.35099
GTEX-13113-0526-SM-5GCN2	Blood Vessel	10.3711	15.2105	0.000999989	12.0612	15.1705	1.71095	1.81102	0.240999
GTEX-13N1W-0011-R4a-SM-5MR52	Brain	4.08094	3.7311	0.0810019	8.91108	6.90097	0.801014	0.121002	0.220997
GTEX-ZTSS-0004-SM-4YCCS	Blood	12.6109	98.6536	0.000999989	7.2511	4.47101	6.4509	0.231006	117.825
GTEX-1211K-2126-SM-59HJZ	Muscle	4.38112	1.34099	0.000999989	1.471	5.58091	1.16103	0.121002	0.000999989
GTEX-ZVT3-2626-SM-5GU5L	Ovary	7.83102	30.4612	0.000999989	0.970971	5.08096	0.300993	1.881	0.0309997
GTEX-13OVK-0006-SM-5O9B7	Blood	4.2009	1.41098	0.0209995	2.78099	1.05103	1.50098	0.000999989	0.291002
GTEX-13NZA-1726-SM-5J1NA	Pancreas	5.71083	15.1705	0.491002	23.2813	9.00109	17.1116	1.87099	0.210998
GTEX-144FL-0626-SM-5LU43	Skin	9.811	12.1712	0.000999989	4.93107	11.2309	13.0213	1.141	0.66099
GTEX-ZV6S-0226-SM-59HJT	Thyroid	12.8911	8.79083	0.100998	9.03109	16.3509	26.4703	1.881	0.0909993
GTEX-WI4N-1126-SM-3LK7Q	Adipose Tissue	6.92109	17.2509	0.121002	22.6211	11.3412	12.1308	1.511	0.251007
GTEX-P78B-1326-SM-3P611	Liver	7.36099	6.33085	0.100998	3.68101	7.97122	1.12101	0.921017	0.171004
GTEX-WZTO-0011-R3B-SM-3NMC6	Brain	6.57094	2.32093	0.000999989	1.31103	4.4009	0.401007	0.300993	0.0710018
GTEX-13NYC-2426-SM-5MR3K	Thyroid	8.26091	16.4909	0.361007	20.3704	12.9807	38.6823	1.54104	0.0209995
GTEX-13NYB-1326-SM-5K7Y1	Esophagus	4.34092	23.9707	0.000999989	13.6914	10.0213	3.12098	2.49096	0.231006
GTEX-Y8E4-0626-SM-4WWDL	Skin	10.8611	6.09109	0.0909993	6.88091	18.5211	13.2912	1.28103	0.330999
GTEX-1212Z-0426-SM-5FQT6	Thyroid	4.3211	31.8407	0.201005	13.2113	11.1812	34.9011	1.58096	0.190994
GTEX-11OF3-0011-R6b-SM-57WBG	Brain	4.35086	1.53103	0.0209995	1.11103	3.31108	0.441015	0.311003	0.0410009
GTEX-XYKS-0226-SM-4BRW3	Heart	6.16115	5.18089	0.000999989	3.87098	4.8909	2.32093	1.141	0.0810019
GTEX-11EM3-1926-SM-5987U	Uterus	13.9307	20.2311	0.0710018	10.6008	15.8312	10.3711	2.73094	0.0710018
GTEX-VJYA-1826-SM-4KL1W	Blood Vessel	9.69069	17.3613	0.0710018	14.8305	12.8911	7.24106	1.42099	0.38101
GTEX-11DXX-1926-SM-5EGJK	Colon	13.4413	10.1711	0.0209995	8.18113	18.6215	4.77103	1.79104	0.190994
GTEX-139D8-2326-SM-5IFGE	Stomach	5.0711	7.72107	0.181005	12.3514	9.10084	11.561	1.09104	0.0909993
GTEX-13O3Q-2126-SM-5KM4C	Stomach	7.49122	9.53082	0.000999989	13.0611	11.7314	3.35102	3.51104	0.271007
GTEX-12C56-1326-SM-5FQSV	Prostate	6.81116	9.46105	0.0710018	7.22101	12.7507	2.51107	1.141	0.0509985
GTEX-ZPCL-0006-SM-4WWAS	Blood	16.601	22.9417	0.291002	36.1018	7.74089	18.5404	0.000999989	1.87099
GTEX-13OVH-3026-SM-5MR4N	Brain	4.6709	4.31093	0.000999989	2.32093	5.18089	0.891002	0.160996	0.121002
GTEX-13D11-1726-SM-5IFGQ	Heart	4.34092	2.841	0.0309997	2.32093	3.31108	1.74098	0.521016	0.100998
GTEX-145LS-0526-SM-5LU8Y	Muscle	3.95095	2.83098	0.000999989	2.01098	4.94099	2.49096	0.34099	0.201005
GTEX-144FL-0426-SM-5O9A1	Nerve	7.10089	19.3908	0.130996	12.4909	9.39114	12.1409	1.06098	0.061002
GTEX-12WSA-0005-SM-5O9BM	Blood	6.05111	1.19102	0.000999989	6.52103	1.511	10.5407	0.000999989	0.260996
GTEX-ZQUD-0926-SM-57WE3	Small Intestine	6.91103	7.2511	0.061002	10.271	19.9913	6.28102	1.61105	1.08103
GTEX-14753-1726-SM-5NQ9X	Adrenal Gland	2.40094	4.62098	0.000999989	3.9411	2.70101	0.361007	0.150998	0.0109996
GTEX-YJ89-0011-R6a-SM-4V6GN	Brain	1.69103	3.55094	0.100998	1.25102	2.71095	0.460988	0.271007	0.0710018
GTEX-XOTO-0226-SM-4B66H	Adipose Tissue	7.70076	19.6111	0.0509985	18.5404	19.7516	15.1506	2.161	0.220997
GTEX-13NZ8-0226-SM-5J2OK	Thyroid	8.07073	10.0012	0.38101	31.5813	16.2009	15.0209	2.41095	0.220997
GTEX-QLQ7-1326-SM-4R1JY	Prostate	12.2211	24.0506	0.280992	19.7612	23.0517	10.6206	1.26103	0.251007
GTEX-13CF3-1626-SM-5IFG9	Esophagus	15.4411	14.3512	0.271007	17.5512	13.101	13.1811	3.88092	0.361007
GTEX-13FXS-0011-R10a-SM-5J2MA	Brain	4.59097	3.89089	0.0209995	1.18099	4.07105	0.361007	0.181005	0.0209995
GTEX-WZTO-1526-SM-4PQYQ	Esophagus	4.95093	15.7306	0.0309997	15.5614	11.2309	8.68123	1.99101	0.0710018
GTEX-14753-1626-SM-5NQ9L	Liver	1.37097	3.35102	0.121002	1.27103	4.11103	0.431012	0.531006	0.0710018
GTEX-X8HC-0726-SM-46MWG	Thyroid	4.84098	19.1504	0.280992	17.7211	17.1009	36.4109	1.27103	0.171004
GTEX-12WSF-0011-R10a-SM-5LZVH	Brain	4.98088	3.51104	0.141003	2.83098	4.65087	0.451	0.210998	0.100998
GTEX-ZXG5-0326-SM-5GICH	Muscle	4.14106	2.51107	0.0209995	1.26103	5.48085	0.921017	0.240999	0.0209995
GTEX-PX3G-0226-SM-3NB2C	Adipose Tissue	13.3707	10.2511	0.251007	29.1515	23.8712	25.0406	4.18086	0.330999
GTEX-S4Q7-0003-SM-3NM8M	Blood	10.3309	96.3291	0.190994	6.3612	3.03101	7.17113	0.770999	47.0819
GTEX-S4P3-1626-SM-3K2AZ	Muscle	3.02095	1.54104	0.000999989	1.141	5.39118	0.99103	0.110998	0.201005
GTEX-NFK9-0226-SM-2HMKQ	Skin	9.04111	4.4309	0.0509985	3.31108	20.5904	4.88108	0.401007	0.69102
GTEX-14A5I-0005-SM-5N9FU	Blood	1.53103	2.52101	0.621015	9.65114	1.15101	4.8909	0.0710018	1.25102
GTEX-11OC5-0006-SM-5N9FA	Blood	9.15081	10.7913	6.80078	67.3917	11.1009	29.7002	0.35099	5.54082
GTEX-Y114-1426-SM-4TT6W	Small Intestine	6.41078	6.01098	0.280992	12.8607	19.801	21.8506	3.14095	0.600985
GTEX-REY6-0926-SM-48FDA	Blood Vessel	7.54123	17.4905	0.0710018	10.2007	10.5509	5.67099	1.471	0.000999989
GTEX-131XF-2026-SM-5DUWG	Testis	8.59085	35.6122	0.141003	11.6012	14.5505	7.24106	1.96101	0.240999
GTEX-1399R-0626-SM-5K7UZ	Blood Vessel	16.5115	12.7312	0.390989	9.49126	13.2214	2.71095	1.61105	0.181005
GTEX-13111-1426-SM-5DUW3	Small Intestine	9.08131	16.9804	0.891002	17.7716	16.5505	17.7605	2.11096	2.31097
GTEX-WFG7-0326-SM-5SI7L	Thyroid	13.081	8.15113	0.061002	11.8507	17.1306	22.0713	2.60106	0.100998
GTEX-12WSG-1426-SM-5FQUK	Ovary	2.63098	27.9815	0.000999989	4.16091	5.79095	0.821026	0.921017	0.0309997
GTEX-131XF-1826-SM-5EGKG	Thyroid	12.2406	9.11094	0.231006	8.17093	21.9904	15.0605	2.44105	0.121002
GTEX-ZPCL-1426-SM-57WEC	Esophagus	12.8411	9.09075	0.061002	17.5415	14.6914	16.5907	2.69092	0.891002
GTEX-ZV68-0006-SM-4YCEJ	Blood	3.80106	7.27123	2.34096	20.3605	3.70096	15.8906	0.271007	4.83093
GTEX-ZZ64-1726-SM-5GZYB	Skin	13.101	7.88112	0.0309997	5.34096	20.2016	12.2712	1.10099	0.0909993
GTEX-PX3G-1626-SM-2S1PT	Muscle	4.231	2.69092	0.0509985	3.12098	8.101	1.29101	0.280992	0.121002
GTEX-11ZUS-1426-SM-5FQSP	Muscle	3.26097	1.27103	0.0410009	1.12101	2.17106	1.27103	0.240999	0.0410009
GTEX-Z9EW-0326-SM-5CVM8	Esophagus	13.8412	8.11111	0.0209995	5.65098	14.7312	3.47112	1.04102	0.311003
GTEX-WEY5-0426-SM-3GIKT	Heart	2.41095	1.551	0.0309997	2.39098	3.45097	1.43098	0.201005	0.141003
GTEX-147F3-0226-SM-5NQBV	Muscle	2.79103	1.66106	0.000999989	1.551	5.53085	1.60103	0.210998	0.0209995
GTEX-OOBJ-1626-SM-2I3F7	Muscle	3.78108	1.04102	0.061002	0.641002	5.78092	0.561011	0.100998	0.000999989
GTEX-11P82-0626-SM-5PNYK	Esophagus	9.58116	10.6509	0.0810019	6.07086	13.0611	4.4009	2.41095	0.641002
GTEX-S4Q7-0126-SM-4AD5P	Spleen	11.8713	7.771	0.460988	35.59	9.7913	19.1809	0.66099	2.44105
GTEX-1269C-2626-SM-5EQ5C	Muscle	3.52104	1.881	0.0410009	2.53099	2.63098	0.891002	0.181005	0.260996
GTEX-QV44-1026-SM-447CG	Esophagus	11.9414	8.32125	0.171004	4.95093	13.9607	6.47105	1.241	0.451
GTEX-S7SF-1426-SM-4AT5A	Vagina	11.8212	9.13117	0.201005	17.2605	12.9807	17.8209	3.28092	0.0810019
GTEX-OOBJ-3026-SM-3NB1D	Blood Vessel	12.9511	19.7215	0.441015	11.241	16.7908	6.78101	1.77104	0.100998
GTEX-OXRL-0326-SM-4MVNY	Heart	3.80106	1.68098	0.000999989	1.79104	3.05104	2.35104	0.220997	0.231006
GTEX-Y3I4-0126-SM-4TT26	Spleen	12.9206	9.77096	2.23101	58.8023	13.101	35.1317	0.410997	1.69103
GTEX-YEC3-1426-SM-4WWEM	Stomach	11.4907	6.94079	0.0710018	6.44107	14.2313	4.6709	1.91096	0.401007
GTEX-13OVI-1026-SM-5L3EM	Uterus	10.9412	23.6112	0.150998	9.6311	18.6112	7.03085	1.78102	0.181005
GTEX-NL3H-0011-R7a-SM-2I3G5	Brain	1.79104	4.62098	0.0309997	2.88106	2.56099	0.460988	0.35099	0.000999989
GTEX-145MO-1326-SM-5Q5EF	Lung	7.74089	48.1412	0.220997	34.9713	8.83114	14.7006	2.00097	0.291002
GTEX-ZLV1-2026-SM-5EQMB	Nerve	8.45087	16.5505	0.061002	16.5505	10.9314	4.4009	1.35097	0.000999989
GTEX-11ZVC-0011-R4a-SM-5BC6Z	Brain	1.83096	4.54097	0.000999989	0.960994	2.40094	0.220997	0.280992	0.000999989
GTEX-X4XX-0126-SM-3NMC2	Skin	10.3109	5.15117	0.0410009	5.87097	15.6014	8.23118	0.511002	1.01101
GTEX-ZAK1-2926-SM-5HL9S	Brain	4.87094	0.641002	0.000999989	0.710989	12.8109	0.921017	0.121002	0.0710018
GTEX-ZTX8-1226-SM-4YCE9	Breast	15.0407	17.2712	0.0509985	12.5812	17.5914	25.3515	2.03101	0.141003
GTEX-X261-0626-SM-3NMD9	Breast	7.20101	14.941	0.0209995	13.5011	15.0407	9.82121	2.00097	0.531006
GTEX-12WSL-2626-SM-5GCNV	Blood Vessel	7.81096	17.4808	0.0410009	8.30109	14.401	1.99101	0.781003	0.000999989
GTEX-R55G-0226-SM-48FEI	Spleen	15.1611	15.0605	1.36103	51.5607	18.1916	28.1507	1.241	5.68082
GTEX-12WSE-0926-SM-5S2VX	Heart	2.47101	5.4009	0.061002	3.9109	3.39097	4.07105	0.621015	0.110998
GTEX-14ICL-1126-SM-5S2RE	Pancreas	2.611	1.241	0.0209995	5.65098	6.35107	4.4611	1.03097	0.401007
GTEX-12WSE-0011-R6b-SM-5LZV5	Brain	2.17106	0.811015	0.0209995	0.32099	3.19098	0.160996	0.110998	0.0209995
GTEX-YF7O-0726-SM-4W213	Thyroid	9.811	5.97111	0.160996	8.28097	16.8013	15.7208	1.46104	0.0309997
GTEX-ZG7Y-0926-SM-5EQ6O	Heart	4.58112	1.57102	0.0309997	3.01091	2.841	2.20106	0.271007	0.150998
GTEX-QCQG-2126-SM-2S1P8	Muscle	3.22098	0.761017	0.000999989	1.33099	8.06123	1.16103	0.141003	0.000999989
GTEX-XQ3S-2526-SM-4BOOG	Prostate	6.70111	9.59112	0.130996	10.8011	15.2211	8.9012	1.52098	0.0710018
GTEX-13S86-0826-SM-5SI6J	Esophagus	14.6812	11.8507	0.271007	20.8504	18.5404	14.4811	3.95095	0.330999
GTEX-TSE9-2726-SM-4DXSQ	Cervix Uteri	4.4309	35.1902	0.0710018	9.72097	8.13082	6.09109	0.69102	0.000999989
GTEX-11UD2-0426-SM-5EQ5W	Nerve	8.36114	26.8416	0.181005	19.3814	16.3011	17.8308	0.781003	0.240999
GTEX-Y3I4-1326-SM-4TT8Z	Small Intestine	4.55105	5.11098	0.000999989	13.801	12.3711	4.68095	0.561011	0.441015
GTEX-111YS-0008-SM-5Q5BH	Skin	21.8007	40.0297	0.000999989	8.97119	11.7509	3.88092	3.68101	0.0309997
GTEX-13O3O-0426-SM-5KM2Y	Blood Vessel	6.37091	22.001	0.000999989	3.44093	26.5511	1.43098	0.781003	0.0309997
GTEX-PWOO-0006-SM-2I3E3	Blood	26.1203	22.9417	0.361007	79.7383	9.95071	47.7921	0.0209995	3.32096
GTEX-11EQ9-1326-SM-5985X	Small Intestine	15.0908	10.0708	0.580996	16.2605	22.7107	37.6219	4.60085	0.941022
GTEX-14753-1926-SM-5NQAA	Esophagus	5.22091	11.1812	0.0209995	14.421	7.81096	4.21111	0.790973	0.0209995
GTEX-OXRP-0326-SM-33HBJ	Thyroid	6.1309	10.2909	0.171004	27.9214	14.2709	21.7509	1.16103	0.0810019
GTEX-111CU-0926-SM-5EGIK	Stomach	6.21089	1.85099	0.0509985	6.02099	8.44092	13.871	0.891002	0.460988
GTEX-13VXT-0426-SM-5LU57	Nerve	8.24089	17.401	0.0710018	15.8906	19.2115	8.41113	0.66099	0.701007
GTEX-WY7C-2726-SM-3NB3P	Breast	8.56112	9.6311	0.0410009	13.6507	16.8409	10.831	1.98096	0.061002
GTEX-OHPN-2926-SM-3LK65	Nerve	11.4812	13.2012	0.471	15.2708	13.2214	8.84094	2.56099	0.181005
GTEX-QEG4-0426-SM-5S2VQ	Heart	2.86096	1.98096	0.000999989	3.28092	3.17092	2.27096	0.511002	1.131
GTEX-139TS-0011-R6a-SM-5J2OB	Brain	1.40104	2.41095	0.000999989	1.23097	2.10103	0.300993	0.130996	0.000999989
GTEX-ZZPT-2926-SM-5EQ5S	Brain	3.99114	2.82099	0.000999989	2.48096	10.6206	1.37097	0.460988	0.0410009
GTEX-145MI-0011-R4b-SM-5PNZH	Brain	2.13095	4.78096	0.000999989	32.521	2.60106	0.471	0.32099	0.32099
GTEX-QLQW-0726-SM-447AA	Stomach	2.34096	1.43098	0.171004	3.97099	5.36099	8.06123	0.531006	0.000999989
GTEX-13G51-2526-SM-5LZYK	Skin	16.1415	7.3712	0.210998	6.3612	14.6406	14.3512	1.141	0.210998
GTEX-ZTPG-1226-SM-4YCDO	Heart	4.71089	3.0409	0.110998	5.4009	5.3811	2.04103	0.38101	0.680987
GTEX-NFK9-0926-SM-2HMJU	Heart	2.22099	1.75103	0.0309997	1.61105	3.81108	1.30098	0.100998	0.121002
GTEX-XOTO-0006-SM-4B64T	Blood	1.63105	1.02101	0.390989	6.94079	1.48103	5.87097	0.0109996	0.821026
GTEX-WHWD-0126-SM-4OORS	Spleen	18.2611	14.411	7.66083	52.4402	19.4016	37.1219	1.70102	4.26102
GTEX-148VJ-0826-SM-5LU8V	Lung	5.29085	57.8322	1.42099	51.5	12.9009	16.3611	1.84101	5.81105
GTEX-11EQ9-0926-SM-5HL6I	Esophagus	10.9011	7.90081	0.000999989	5.46113	18.5314	4.29096	0.921017	0.0410009
GTEX-QV31-0626-SM-447C5	Stomach	3.42096	1.57102	0.311003	5.45092	10.1711	14.051	0.850982	0.210998
GTEX-13OW8-2926-SM-5L3FV	Brain	5.02109	1.10099	0.000999989	4.39085	9.71087	1.59096	0.150998	0.061002
GTEX-11EQ9-0006-SM-5LUB6	Blood	5.30113	2.38105	0.0309997	10.0012	1.93094	8.45087	0.000999989	0.361007
GTEX-13FTX-1526-SM-5K7VJ	Skin	14.5113	7.82125	0.0909993	5.47098	18.6616	7.17113	1.10099	0.410997
GTEX-ZQG8-0008-SM-4YCE7	Skin	28.2504	34.3801	0.0710018	12.6109	12.8011	6.2208	4.70111	0.0710018
K-562-SM-5GZWN	Bone Marrow	17.4505	0.621015	0.061002	4.4611	12.681	0.110998	0.000999989	0.460988
GTEX-12WSN-1826-SM-5LZUT	Esophagus	13.2811	11.6407	0.0710018	14.5314	16.4111	7.18108	1.59096	0.251007
GTEX-13FTW-2626-SM-5K7WL	Skin	9.40091	5.03084	0.0509985	3.24091	14.3006	6.74117	0.371002	0.811015
GTEX-NPJ7-0011-R1a-SM-3GACT	Brain	2.48096	3.4909	0.000999989	3.65102	3.99114	1.02101	0.610981	0.0909993
GTEX-ZVT2-0426-SM-5E44S	Uterus	14.2511	47.0917	0.121002	11.9613	19.9111	6.66082	2.11096	0.861009
GTEX-Y3IK-0226-SM-51MRJ	Adrenal Gland	13.681	40.0908	0.0909993	6.85093	5.42115	2.08103	3.17092	0.061002
GTEX-11ONC-2826-SM-5P9GQ	Pituitary	6.75099	11.0609	0.311003	8.03111	9.00109	3.69097	0.590988	0.181005
GTEX-145LS-0011-R3a-SM-5S2VJ	Brain	3.55094	4.70111	0.0209995	2.76102	4.13103	1.25102	0.371002	0.0509985
GTEX-131XH-0226-SM-5LZVB	Heart	1.05103	4.34092	0.000999989	5.58091	2.25105	1.49102	0.160996	0.870973
GTEX-ZTX8-0526-SM-59HLD	Small Intestine	11.6108	8.61111	0.34099	16.3906	25.1311	45.2297	6.81116	0.721014
GTEX-145LT-1626-SM-5O992	Muscle	3.36102	1.141	0.000999989	1.70102	3.611	1.141	0.0909993	0.0810019
GTEX-13RTJ-2126-SM-5S2PZ	Prostate	6.8709	13.9008	0.000999989	6.40101	6.58097	2.10103	1.16103	0.311003
K-562-SM-5PNWU	Bone Marrow	16.691	0.730978	0.0209995	4.88108	13.101	0.181005	0.0109996	0.561011
GTEX-11DXY-0126-SM-5H11Q	Skin	8.0909	22.0713	0.0810019	5.34096	11.451	8.42105	0.980983	1.64103
GTEX-TML8-1326-SM-4DXTO	Colon	12.1409	10.4107	0.38101	13.531	13.5507	36.4311	1.57102	1.38099
GTEX-11NUK-3126-SM-5986M	Pituitary	6.49082	7.68103	0.160996	5.12091	12.5412	3.85091	0.941022	0.110998
GTEX-QLQW-0626-SM-447A6	Esophagus	6.85093	8.17093	0.000999989	8.93087	15.7208	4.72102	1.25102	0.201005
GTEX-RN64-1826-SM-48FDV	Liver	4.18086	3.59104	0.330999	2.34096	9.02108	2.44105	0.69102	0.150998
GTEX-11ZVC-0011-R1b-SM-5BC6M	Brain	2.78099	3.95095	0.0410009	1.29101	2.18102	0.330999	0.34099	0.0209995
GTEX-113IC-0008-SM-5QGRF	Skin	20.0315	28.611	0.000999989	8.6512	14.3313	7.97122	2.28105	0.100998
GTEX-X8HC-1626-SM-46MWE	Heart	2.82099	4.38112	0.0710018	6.641	4.78096	5.10107	0.171004	0.861009
GTEX-X15G-0926-SM-4PQZE	Esophagus	15.3908	13.2811	0.220997	6.4509	13.6507	4.10107	2.33092	0.511002
GTEX-12KS4-0826-SM-5BC5R	Muscle	2.00097	2.15099	0.061002	2.01098	3.42096	1.53103	0.0810019	0.000999989
GTEX-OHPN-0011-R10A-SM-5S2U3	Brain	3.38112	2.611	0.421002	5.67099	5.13086	3.16104	0.880992	0.35099
GTEX-WYBS-1626-SM-4ONCA	Esophagus	3.03101	20.6805	0.0509985	25.1015	10.3309	11.451	0.841013	0.100998
GTEX-YFC4-0011-R9a-SM-4SOK4	Brain	4.03089	2.07096	0.121002	9.64112	4.63092	2.37101	1.07103	0.390989
K-562-SM-32PLC	Bone Marrow	11.051	1.16103	0.0309997	4.96089	16.211	0.181005	0.0309997	0.271007
GTEX-11LCK-1226-SM-5Q5AM	Muscle	6.18083	1.06098	0.000999989	1.83096	4.39085	1.34099	0.280992	0.0309997
GTEX-WZTO-0826-SM-3NM8Q	Muscle	1.99101	2.18102	0.0309997	1.04102	3.00091	1.23097	0.460988	0.000999989
GTEX-13D11-2226-SM-5IFEO	Pancreas	3.77088	1.98096	0.100998	6.68117	5.75095	4.19102	1.93094	0.100998
GTEX-REY6-1026-SM-2TF4Y	Heart	3.30099	3.57093	0.231006	6.48093	5.19096	3.05104	0.471	0.240999
GTEX-OXRO-2026-SM-2YUMZ	Heart	1.20097	2.10103	0.000999989	40.8312	1.77104	1.16103	0.34099	0.34099
GTEX-ZAB4-0011-R11a-SM-4SOKI	Brain	7.94089	0.701007	0.0309997	1.31103	13.4711	2.27096	0.271007	0.000999989
GTEX-11VI4-0326-SM-5EQ6L	Stomach	7.28082	11.291	0.100998	9.38073	17.1805	6.43081	2.85106	0.181005
GTEX-13X6K-0526-SM-5LU51	Blood Vessel	4.94099	29.0306	0.0309997	6.31114	13.8307	0.93103	2.35104	0.000999989
GTEX-U8XE-0526-SM-3DB8R	Nerve	11.2309	32.8404	0.061002	55.1428	23.2507	9.43093	0.901001	0.280992
GTEX-WFG7-0926-SM-4LMK7	Blood Vessel	14.1311	11.9712	0.100998	19.3304	17.4905	8.17093	0.921017	0.0309997
GTEX-13OW6-2526-SM-5IJEC	Stomach	3.14095	1.471	0.121002	7.17113	4.94099	9.3308	0.491002	0.550991
GTEX-Q2AH-0526-SM-2I3ED	Heart	4.0609	0.980983	0.121002	3.92094	3.43093	2.02104	0.220997	0.100998
GTEX-XV7Q-0005-SM-4BRWI	Blood	11.3908	7.771	1.01101	15.2909	4.58112	10.8611	0.811015	0.99103
GTEX-ZYFD-3026-SM-5E44C	Brain	5.44111	3.34105	0.000999989	14.721	5.13086	0.38101	0.0309997	0.0410009
GTEX-13NYS-0011-R8a-SM-5MR5H	Brain	4.92117	9.58116	0.000999989	3.55094	3.59104	0.910986	0.271007	0.0410009
GTEX-X261-0011-R8A-SM-4E3I5	Brain	6.77115	7.61107	0.571015	9.44074	4.56116	1.27103	0.511002	0.0810019
GTEX-147GR-2826-SM-5RQK8	Colon	4.18086	16.3906	0.0810019	17.9411	10.1506	10.4512	3.64091	0.271007
GTEX-ZV6S-0003-SM-4YCCT	Blood	18.2611	48.0512	0.0509985	8.93087	2.89106	7.90081	0.190994	81.3912
GTEX-ZUA1-0011-R1a-SM-4YCE2	Brain	3.69097	3.68101	0.061002	2.43092	3.95095	0.751008	0.580996	0.291002
GTEX-ZYFD-0626-SM-5E44E	Skin	4.08094	35.0806	0.171004	19.8408	13.7114	15.7306	0.35099	32.2405
GTEX-ZYT6-0926-SM-5GIEM	Heart	4.08094	5.63103	0.110998	6.44107	5.0711	3.65102	1.03097	0.69102
GTEX-111YS-0426-SM-5987O	Heart	3.06099	2.09101	0.000999989	2.02104	3.44093	1.49102	0.431012	0.240999
GTEX-ZDYS-0126-SM-5HL6X	Blood Vessel	10.0812	25.5704	0.130996	19.5704	15.9314	11.3609	2.361	0.361007
GTEX-XUZC-0008-SM-4BOQG	Skin	18.6512	49.4603	0.000999989	5.77091	16.0411	7.44102	4.25099	0.0810019
GTEX-Y3IK-2226-SM-4YCD4	Vagina	9.72097	21.0508	0.410997	14.8213	10.9412	12.711	3.31108	0.121002
GTEX-O5YV-1126-SM-3LK73	Adrenal Gland	21.0303	13.1811	0.0410009	16.0711	8.36114	2.88106	1.95098	0.401007
GTEX-1399T-2826-SM-5KLYZ	Skin	8.83114	13.5011	0.000999989	4.4309	17.4808	14.8614	0.910986	0.850982
GTEX-ZLWG-2226-SM-5DUWO	Adipose Tissue	16.5012	10.3109	0.000999989	15.7611	17.4711	16.6714	1.12101	0.000999989
GTEX-WWYW-0008-SM-4MVPF	Skin	17.5707	53.7316	0.000999989	9.62109	17.5208	21.3417	7.94089	0.100998
GTEX-145MI-3126-SM-5Q5CF	Brain	2.19102	3.98091	0.000999989	30.88	10.9011	1.72094	0.210998	1.39098
GTEX-WI4N-2226-SM-4OOS9	Colon	6.35107	23.7705	0.0710018	18.1614	10.0512	3.7311	1.30098	1.01101
GTEX-OHPJ-0726-SM-2YUNM	Nerve	8.50081	12.0011	0.0509985	11.0809	22.3314	6.59101	1.22103	0.000999989
GTEX-13JVG-0426-SM-5MR59	Blood Vessel	6.47105	28.182	0.0810019	12.2008	5.42115	3.89089	0.761017	0.150998
GTEX-RUSQ-0426-SM-47JWR	Blood Vessel	8.31087	19.1916	0.311003	15.9215	15.6111	3.38112	0.650987	0.571015
GTEX-12ZZX-0011-R8a-SM-5DUW8	Brain	6.71087	2.50099	0.061002	1.96101	4.81088	0.371002	0.401007	0.061002
GTEX-14AS3-0226-SM-5Q5B6	Thyroid	9.62109	11.3506	1.11103	14.6406	15.6805	30.4717	3.45097	0.201005
GTEX-13NYS-3126-SM-5KLYV	Brain	7.22101	7.9211	0.000999989	5.64119	6.46119	0.571015	0.410997	0.0209995
GTEX-T2IS-2226-SM-4DM65	Uterus	15.4711	13.6006	0.220997	10.2809	19.1504	9.28113	1.551	0.160996
GTEX-13OW6-2726-SM-5J2OE	Skin	10.6206	26.7914	0.100998	6.29105	19.6315	10.4911	1.96101	1.10099
GTEX-13OW8-0011-R8a-SM-5L3G5	Brain	2.04103	0.901001	0.061002	5.44111	2.27096	0.671007	0.0509985	0.0410009
GTEX-11WQC-0011-R10a-SM-57WCT	Brain	2.9709	5.88116	0.0209995	0.880992	3.86107	0.311003	0.34099	0.000999989
GTEX-132QS-0326-SM-5IJFN	Thyroid	14.9213	6.07086	0.0509985	5.89095	17.8308	15.5108	0.861009	0.061002
GTEX-QXCU-1126-SM-48FE5	Esophagus	3.51104	8.28097	0.000999989	11.8408	28.272	3.63108	0.300993	0.130996
GTEX-145MN-0226-SM-5QGPY	Adrenal Gland	12.9906	72.5901	0.201005	9.25094	12.4011	5.56083	4.98088	0.891002
GTEX-YJ8A-0526-SM-5IFHT	Adipose Tissue	12.0311	12.7013	0.0509985	14.9606	20.7912	21.4603	1.45095	0.0509985
GTEX-S3XE-0526-SM-4AD4G	Pancreas	1.801	2.46092	0.000999989	4.2009	6.11096	3.611	1.07103	0.0410009
GTEX-SIU7-1126-SM-2XCDW	Thyroid	12.6013	7.87074	0.0710018	11.3412	19.5514	29.62	2.32093	0.100998
GTEX-XLM4-1526-SM-4AT6D	Testis	5.0711	8.45087	0.0309997	3.22098	5.0711	1.09104	1.32097	0.0309997
GTEX-X4XX-0011-R2A-SM-3P623	Brain	7.44102	2.29104	0.0509985	10.0708	7.00119	2.04103	0.861009	0.260996
GTEX-147F4-2526-SM-5NQBB	Adrenal Gland	5.46113	16.6206	0.0209995	13.8614	6.2208	0.880992	1.08103	0.0410009
GTEX-139TU-0626-SM-5KM3X	Breast	12.9906	12.5212	0.100998	26.251	24.361	30.9207	1.25102	0.330999
GTEX-Y8LW-0726-SM-5IFI1	Esophagus	15.8411	12.4011	0.171004	18.4404	17.0004	20.4411	5.46113	1.06098
GTEX-ZXG5-0426-SM-5GICT	Nerve	5.6209	22.9512	0.0209995	14.191	12.9412	3.97099	2.64103	0.0810019
GTEX-Y3I4-1126-SM-4TT7Y	Colon	8.85075	6.12114	0.0209995	9.26121	12.2008	2.94099	1.05103	0.35099
GTEX-QDVN-2326-SM-2S1PF	Blood Vessel	9.45122	17.171	0.000999989	17.561	11.2309	1.82096	0.330999	0.000999989
GTEX-12WSC-2826-SM-5BC5Y	Skin	9.51102	20.9213	0.141003	10.9011	18.2915	14.5606	1.62102	1.18099
GTEX-ZT9X-1926-SM-57WE7	Adipose Tissue	10.3913	7.26116	0.0309997	18.7407	14.1811	10.2909	3.05104	0.0209995
GTEX-WZTO-0011-R6B-SM-4E3J6	Brain	5.98106	3.41101	0.0509985	0.850982	4.30108	0.460988	0.300993	0.0209995
GTEX-11ZUS-0011-R8a-SM-5BC73	Brain	5.32101	0.680987	0.000999989	1.17097	2.44105	0.901001	0.35099	0.0909993
GTEX-X3Y1-0726-SM-3P5YU	Pancreas	1.52098	0.531006	0.0410009	3.67107	3.9611	4.60085	0.541	0.0509985
GTEX-WHSE-0011-R8A-SM-3P5Z1	Brain	5.03084	3.37105	0.110998	8.94078	5.70094	1.29101	0.190994	0.0209995
GTEX-ZP4G-2026-SM-57WEH	Muscle	10.2007	2.54101	0.000999989	2.65093	7.3712	2.28105	0.371002	0.130996
GTEX-1122O-0226-SM-5N9DA	Thyroid	9.23108	5.74099	0.0209995	12.0712	17.0914	22.8006	1.10099	0.061002
GTEX-13FTW-0426-SM-5K7X2	Adipose Tissue	6.4509	11.5907	0.0710018	28.9502	14.941	6.85093	1.69103	4.98088
GTEX-13N1W-3126-SM-5IFHB	Pituitary	6.55093	4.01111	0.0909993	7.36099	17.5306	0.830988	0.0810019	0.0810019
GTEX-XPVG-0326-SM-4B653	Pancreas	3.00091	1.58096	0.000999989	5.16118	7.22101	6.11096	1.511	0.0509985
GTEX-145ME-0926-SM-5O9AR	Small Intestine	11.7111	14.091	0.621015	33.1308	22.0514	20.2816	2.31097	3.68101
GTEX-PLZ6-1426-SM-5S2TR	Skin	9.7608	5.52089	0.061002	3.19098	18.4213	11.4114	1.31103	0.960994
GTEX-QCQG-1626-SM-48U26	Colon	9.6311	15.0313	0.100998	16.991	12.3514	21.9204	1.50098	0.330999
GTEX-T6MN-0011-R6A-SM-5CHQD	Brain	0.000999989	0.000999989	0.000999989	0.830988	0.000999989	0.000999989	0.000999989	0.000999989
GTEX-Z9EW-1726-SM-5CVMO	Muscle	4.58112	0.641002	0.0209995	0.701007	3.21095	0.621015	0.150998	0.000999989
GTEX-117YX-1126-SM-5H128	Heart	2.92108	1.35097	0.000999989	1.511	2.86096	0.921017	0.361007	0.141003
GTEX-T2IS-1926-SM-4DM74	Vagina	9.68129	19.1411	1.68098	24.7302	17.9213	25.4307	2.04103	0.401007
GTEX-11NUK-1026-SM-5HL5J	Thyroid	6.90097	19.411	0.511002	15.4411	14.9606	22.5914	1.91096	0.410997
GTEX-13X6I-0011-R8a-SM-5PNZF	Brain	4.94099	2.05096	0.0410009	4.68095	4.35086	1.01101	0.680987	0.0509985
K-562-SM-4IHK7	Bone Marrow	20.0315	0.950989	0.0710018	4.71089	13.3512	0.220997	0.0209995	0.600985
GTEX-12WSA-0326-SM-5BC6I	Adipose Tissue	13.141	18.8305	0.061002	18.5906	26.2419	22.0316	1.79104	0.100998
GTEX-1192W-3026-SM-5GZZV	Pituitary	7.72107	2.211	0.110998	2.91097	10.9314	2.15099	0.471	0.0309997
GTEX-11OF3-0011-R5a-SM-57WB4	Brain	3.9109	3.37105	0.240999	1.551	3.3311	1.00097	0.390989	0.0710018
GTEX-XV7Q-1026-SM-4BRVR	Esophagus	12.5507	10.2511	0.061002	9.811	13.141	3.71098	1.37097	0.110998
GTEX-O5YT-1326-SM-3MJGR	Adrenal Gland	13.5114	65.449	0.0109996	7.50109	11.9513	1.95098	6.21089	0.121002
GTEX-13FXS-0011-R5b-SM-5LZYE	Brain	4.24099	5.011	0.0209995	1.15101	3.68101	0.811015	0.190994	0.0309997
GTEX-WL46-0011-R1A-SM-3LK6M	Brain	3.68101	2.31097	0.0209995	2.95099	3.52104	1.17097	0.34099	1.75103
GTEX-NPJ8-1526-SM-2D7VU	Brain	6.29105	3.611	0.0509985	8.47081	8.74101	1.801	0.740977	0.280992
GTEX-XLM4-0004-SM-4AT5I	Blood	25.0216	44.462	0.0509985	13.5011	6.34095	11.8007	0.171004	69.5414
GTEX-ZAB4-3126-SM-57WCJ	Pituitary	6.33085	4.69101	0.130996	3.18104	10.4208	3.28092	0.451	0.0309997
GTEX-Y3I4-0226-SM-4TT27	Thyroid	8.85075	7.08123	0.0810019	13.071	12.4209	21.0814	1.41098	0.000999989
GTEX-R55G-2126-SM-2TC67	Nerve	10.4512	21.4812	0.0710018	10.8011	16.7606	6.14111	1.471	0.0810019
GTEX-13IVO-0011-R3b-SM-5IJBJ	Brain	2.34096	2.841	0.000999989	5.48085	1.93094	0.421002	0.110998	0.000999989
GTEX-Y5V6-0005-SM-4V6FD	Blood	15.7513	10.9011	0.260996	29.7105	5.41102	24.6617	0.0109996	1.56103
GTEX-145LU-2026-SM-5Q5E8	Muscle	2.9011	2.72093	0.0209995	1.18099	3.17092	0.841013	0.220997	0.330999
GTEX-Y114-0526-SM-4TT8V	Adrenal Gland	9.55132	36.6413	0.0410009	3.64091	7.88112	0.921017	3.41101	0.150998
GTEX-14ASI-3026-SM-5S2PN	Brain	5.61116	2.59098	0.000999989	1.42099	5.94098	0.600985	0.471	0.0309997
GTEX-11ZUS-2726-SM-5FQUA	Testis	3.82113	7.41116	0.0209995	1.32097	4.07105	1.85099	8.96125	0.0410009
GTEX-X15G-0526-SM-3NMB7	Thyroid	7.76077	18.0209	0.260996	19.4811	15.7808	26.5106	1.95098	0.0710018
GTEX-13OW7-0526-SM-5J1N2	Nerve	9.90118	15.9314	0.100998	12.6714	13.951	8.79083	1.34099	0.201005
GTEX-13W3W-1126-SM-5L3DO	Adipose Tissue	6.55093	24.0406	0.061002	23.5605	18.3804	10.1506	2.95099	1.17097
GTEX-T5JC-0426-SM-32PLO	Skin	8.41113	8.26091	0.0909993	5.59098	13.6308	6.28102	0.69102	1.03097
GTEX-13PL7-0326-SM-5IJEK	Esophagus	12.0211	9.09075	0.0410009	7.19104	16.8608	6.7309	1.241	0.280992
GTEX-13FXS-0011-R11a-SM-5L3DM	Brain	9.12105	0.850982	0.0710018	0.66099	14.2907	0.480997	0.150998	0.0410009
GTEX-13NYC-2626-SM-5K7VN	Salivary Gland	5.54082	9.28113	0.190994	16.7014	10.3309	9.17113	0.630995	0.141003
GTEX-OHPM-0326-SM-33HCA	Heart	2.75108	2.52101	0.0710018	2.47101	2.9709	2.35104	0.390989	0.0309997
GTEX-RM2N-0826-SM-48FD3	Stomach	3.59104	1.71095	0.160996	4.18086	8.70111	10.351	0.870973	0.0209995
GTEX-ZTSS-0626-SM-59867	Esophagus	11.831	9.00109	0.0710018	12.1906	14.1713	12.9107	2.33092	1.17097
GTEX-Z93S-2826-SM-57WBL	Brain	9.91079	0.730978	0.000999989	0.621015	16.3215	0.950989	0.0710018	0.0309997
GTEX-TMKS-0126-SM-3DB7S	Skin	8.43098	10.1506	0.251007	10.1809	16.9006	12.2109	1.64103	5.49112
GTEX-Y9LG-0006-SM-4VBRK	Blood	36.0119	11.8713	0.231006	44.7216	8.30109	23.4904	0.0410009	0.311003
GTEX-1399R-0426-SM-5IJE3	Pancreas	2.01098	2.15099	0.0810019	4.97088	4.38112	4.13103	1.41098	0.000999989
GTEX-145LT-1026-SM-5LU9O	Small Intestine	14.0306	12.7013	0.251007	15.6805	20.001	31.6515	5.16118	0.761017
GTEX-X4XY-0626-SM-4E3IN	Muscle	4.19102	1.71095	0.0810019	1.62102	9.40091	1.16103	0.171004	0.0909993
GTEX-11DXW-0326-SM-5H11W	Adipose Tissue	9.19086	19.7106	0.141003	16.4806	15.3514	15.661	2.41095	0.650987
GTEX-11DXZ-1626-SM-5GIDI	Colon	10.3611	9.50114	0.100998	4.22104	15.6208	2.92108	3.18104	0.160996
GTEX-ZAJG-3126-SM-5HL9J	Brain	4.18086	3.46103	0.0509985	18.3207	7.73124	0.790973	0.210998	0.431012
GTEX-ZYY3-0826-SM-5E44R	Pancreas	2.25105	1.65095	0.0410009	6.2208	4.35086	3.7311	0.561011	0.0410009
GTEX-12ZZW-0011-R4a-SM-5DUX9	Brain	2.02104	0.431012	0.000999989	0.531006	1.82096	0.130996	0.181005	0.0209995
GTEX-13QIC-0011-R10a-SM-5O9C7	Brain	4.92117	2.83098	0.0209995	1.19102	5.51095	0.610981	0.220997	0.110998
GTEX-XUJ4-0226-SM-4BOP8	Spleen	10.6206	13.271	1.211	58.7412	17.2605	35.0101	0.69102	7.9508
GTEX-WFG8-1026-SM-4LVMZ	Esophagus	9.95071	8.36114	0.000999989	8.52087	15.9513	8.43098	0.830988	0.220997
GTEX-145MF-1526-SM-5LU95	Esophagus	9.12105	17.9213	0.061002	12.8714	13.0213	10.9109	2.68105	0.000999989
GTEX-YEC3-2526-SM-5CVLS	Esophagus	11.8408	6.77115	0.271007	20.2704	12.3411	15.9513	4.0609	0.521016
GTEX-P78B-1826-SM-3P5YX	Stomach	7.61107	5.6209	0.861009	16.1706	10.5108	28.81	1.511	0.251007
GTEX-YFCO-1226-SM-5LUAT	Skin	7.63115	5.94098	0.000999989	4.37111	17.9611	7.79095	0.671007	0.240999
GTEX-PW2O-0006-SM-2I3DV	Blood	8.18113	0.521016	0.0909993	3.68101	1.37097	4.05106	0.0109996	0.401007
GTEX-Q2AI-0326-SM-2I3EK	Thyroid	11.151	13.091	0.201005	14.9109	18.841	16.771	2.83098	0.280992
GTEX-13RTJ-0011-R2a-SM-5PNW9	Brain	3.62103	1.60103	0.0209995	3.99114	4.6709	1.15101	0.910986	0.0509985
GTEX-SUCS-1026-SM-5CHTC	Colon	0.000999989	0.000999989	0.000999989	0.000999989	0.000999989	0.000999989	0.000999989	0.000999989
GTEX-WOFL-0626-SM-3MJG3	Muscle	3.18104	7.20101	0.0109996	10.8709	7.66083	11.7713	0.590988	0.0909993
GTEX-WFG8-1726-SM-4LVM6	Colon	8.94078	8.05118	0.000999989	4.70111	14.5314	3.57093	0.861009	0.410997
GTEX-X638-0008-SM-47JZ7	Skin	15.3514	70.0834	0.000999989	11.4708	18.9812	11.5306	12.6407	0.0710018
GTEX-11NSD-1226-SM-5986Q	Esophagus	14.1105	11.4209	0.35099	10.7212	14.0208	9.62109	2.10103	0.550991
GTEX-13PL7-1026-SM-5MR5C	Adrenal Gland	16.1706	53.3605	0.34099	5.90117	10.7212	4.64089	4.03089	0.390989
GTEX-145MI-0526-SM-5O9A8	Skin	11.2511	14.9306	0.061002	4.08094	18.8815	7.26116	0.980983	1.92106
GTEX-13CZV-0011-R3a-SM-5KM27	Brain	2.85106	6.61114	0.000999989	5.19096	4.27108	0.480997	0.160996	0.0209995
GTEX-WYVS-0726-SM-4ONDO	Esophagus	9.53082	8.86119	0.130996	13.8508	12.6214	15.9513	3.32096	0.32099
GTEX-13FHO-0326-SM-5IJBH	Adipose Tissue	9.1413	15.7513	0.110998	23.9906	13.8412	17.7913	1.87099	0.231006
GTEX-YEC3-1126-SM-5IFIH	Blood Vessel	10.4208	17.7015	0.0309997	10.4606	17.4711	7.70076	1.141	0.000999989
GTEX-131XW-3226-SM-5LZUO	Pituitary	4.68095	2.53099	0.0410009	5.13086	13.4106	1.44103	0.0909993	0.0509985
GTEX-P4PQ-0226-SM-2S1NK	Adipose Tissue	14.461	13.3106	0.000999989	23.6309	20.9111	19.7407	3.60101	0.000999989
GTEX-145MO-2126-SM-5Q5CZ	Pancreas	2.31097	2.95099	0.000999989	6.58097	3.78108	2.67104	0.93103	0.0209995
GTEX-X5EB-2326-SM-46MW5	Muscle	1.63105	0.950989	0.000999989	0.751008	7.93098	0.93103	0.141003	0.000999989
GTEX-12WSK-2626-SM-5GCOT	Nerve	9.09075	10.2909	0.141003	10.2809	13.151	4.98088	0.850982	0.000999989
GTEX-1313W-3226-SM-5LZUU	Pituitary	6.19112	6.52103	0.260996	6.15091	10.0708	3.19098	1.25102	0.150998
GTEX-Y114-0726-SM-4TT6U	Spleen	8.35072	16.951	1.43098	34.0905	18.9208	25.0302	1.551	0.501006
GTEX-11NSD-1126-SM-5N9BQ	Esophagus	13.7209	9.28113	0.730978	19.1305	14.7414	18.3804	3.68101	1.40104
GTEX-WI4N-2426-SM-4OOSC	Uterus	7.82125	31.0409	0.000999989	25.0806	6.25106	3.69097	0.641002	0.130996
GTEX-Y111-2926-SM-4TT25	Pituitary	10.3109	10.341	0.390989	6.34095	12.6608	5.23105	2.44105	0.371002
GTEX-12ZZX-0011-R6a-SM-5HL8L	Brain	6.43081	3.89089	0.000999989	0.751008	3.83094	0.35099	0.231006	0.0509985
GTEX-UPIC-1426-SM-4IHLQ	Vagina	6.63088	8.75071	0.280992	22.4011	18.3906	27.6901	1.90105	0.291002
GTEX-11ZTS-3226-SM-5EGID	Brain	5.65098	0.99103	0.0309997	2.39098	11.0909	0.901001	0.0710018	0.000999989
GTEX-13S86-1126-SM-5RQJX	Thyroid	11.4407	11.7111	0.201005	11.1009	16.0011	16.991	2.14102	0.311003
GTEX-XQ8I-0226-SM-4BOPM	Heart	5.00094	3.42096	0.000999989	2.47101	5.04097	2.86096	0.781003	0.0710018
GTEX-U3ZN-0006-SM-3DB7Y	Blood	11.7509	9.20106	0.0909993	25.1904	6.01098	20.9605	0.0810019	1.12101
GTEX-11DYG-0126-SM-59883	Skin	13.3512	4.22104	0.000999989	3.081	15.361	8.34088	0.861009	0.910986
GTEX-PWN1-0008-SM-48TEA	Skin	22.4914	58.2506	0.000999989	8.42105	25.2603	4.6709	12.5412	0.0410009
GTEX-X4XY-0326-SM-46MVZ	Adipose Tissue	16.4715	15.8906	0.0710018	12.8911	27.7709	11.6012	1.59096	0.121002
GTEX-11PRG-0008-SM-5S2N5	Skin	23.5116	29.3218	0.000999989	8.62127	17.3613	6.55093	2.211	0.000999989
GTEX-13SLW-0011-R1a-SM-5S2W7	Brain	1.93094	2.53099	0.0209995	1.64103	3.01091	0.431012	0.220997	0.0209995
GTEX-N7MT-1026-SM-3TW8T	Pituitary	6.84097	5.83082	0.110998	5.16118	11.9812	3.22098	0.561011	0.0909993
GTEX-YEC3-0926-SM-5Q5AC	Adipose Tissue	10.1612	9.98111	0.100998	34.802	25.5314	14.0413	2.42099	0.841013
GTEX-Q2AG-3026-SM-48U1L	Pituitary	6.42101	3.37105	0.0309997	2.161	17.3216	2.80092	0.181005	0.061002
GTEX-1122O-0926-SM-5N9C9	Adipose Tissue	16.3906	3.38112	0.121002	15.1811	14.421	8.06123	0.680987	1.39098
GTEX-Q2AG-0426-SM-2S1PU	Muscle	3.76096	3.12098	0.000999989	2.78099	5.48085	1.32097	0.251007	0.0810019
GTEX-146FR-1726-SM-5Q5DT	Muscle	6.31114	1.61105	0.000999989	1.86103	7.59105	1.11103	0.251007	0.0209995
GTEX-SNOS-0526-SM-4DM54	Bladder	11.2013	15.2306	0.271007	17.3108	20.6705	23.4205	9.6011	0.171004
GTEX-XBEC-1226-SM-4AT65	Heart	3.10093	11.0709	0.0509985	9.19086	5.09083	2.46092	0.480997	0.110998
GTEX-11DZ1-2426-SM-5GZZX	Skin	9.24069	19.3706	0.0209995	12.631	14.6812	10.2113	0.781003	4.81088
GTEX-13W3W-0005-SM-5SI9Y	Blood	32.0711	46.6822	0.141003	90.4532	16.5207	46.6014	0.0410009	2.43092
GTEX-11DYG-0006-SM-5NQB2	Blood	1.17097	0.950989	0.740977	6.3612	1.551	6.48093	0.0410009	1.71095
GTEX-T5JW-2026-SM-4DM63	Breast	17.1615	20.4015	0.0410009	12.8509	17.6109	9.15081	1.471	1.881
GTEX-ZVP2-1626-SM-5GU5D	Stomach	6.07086	1.97096	0.181005	11.5306	14.441	40.3501	1.17097	0.160996
GTEX-RNOR-0011-R4A-SM-3GAD3	Brain	2.841	6.37091	0.0410009	2.89106	3.85091	1.05103	0.941022	0.0710018
GTEX-111YS-1226-SM-5EGGJ	Pancreas	2.06094	1.801	0.0410009	2.71095	6.29105	3.55094	0.781003	0.0410009
GTEX-1192W-0226-SM-5EGGT	Heart	2.96103	9.39114	0.110998	7.03085	4.3211	3.97099	0.650987	0.171004
GTEX-ZV6S-1426-SM-59HKX	Ovary	11.0311	25.5208	0.0309997	8.44092	11.8811	4.04097	2.47101	0.0410009
GTEX-ZZPU-1426-SM-5GZZ6	Stomach	5.78092	3.05104	0.0710018	6.54095	9.34115	10.031	0.701007	0.171004
GTEX-S7SE-0011-R6A-SM-2XCD9	Brain	3.90088	5.50102	0.150998	1.86103	4.50086	0.970971	0.571015	0.000999989
GTEX-ZTTD-2626-SM-57WEX	Colon	9.26121	13.981	0.0509985	12.1106	14.5314	4.81088	2.62097	0.280992
GTEX-OXRP-0006-SM-2I3FN	Blood	1.29101	3.4011	0.251007	12.7914	0.801014	3.4909	0.0410009	0.770999
GTEX-Y114-1926-SM-4TT8J	Vagina	12.6608	10.2511	0.0410009	8.68123	15.1506	3.71098	2.26106	0.0209995
GTEX-RU72-0008-SM-46MV8	Skin	15.0814	43.8225	0.000999989	5.96119	14.941	2.40094	6.01098	0.0209995
GTEX-1399R-0126-SM-5IFEV	Thyroid	12.5307	10.7309	0.35099	11.0709	16.2414	15.7306	3.34105	0.000999989
GTEX-U3ZM-0826-SM-4DXU6	Bladder	11.561	6.29105	0.000999989	4.58112	14.6406	3.41101	1.40104	0.271007
GTEX-WZTO-0011-R1B-SM-3NMAR	Brain	4.73085	3.55094	0.0410009	3.47112	4.05106	1.18099	0.600985	0.0909993
GTEX-11EI6-0326-SM-5EQ6G	Muscle	3.50108	2.67104	0.0710018	1.881	4.70111	1.19102	0.141003	0.0810019
GTEX-13OVG-0326-SM-5KM57	Lung	5.90117	15.6306	0.141003	34.361	20.1904	15.7415	1.91096	1.73099
GTEX-ZC5H-0226-SM-4WAY9	Skin	13.8211	14.7108	0.0909993	12.1906	17.971	17.6709	2.01098	1.16103
GTEX-Y5V6-1026-SM-4VBS2	Esophagus	14.2511	8.59085	0.141003	20.1108	14.5012	16.991	6.77115	0.280992
GTEX-111FC-0526-SM-5GZZ8	Nerve	7.52087	11.4209	0.121002	13.271	14.0812	6.97117	3.081	0.000999989
GTEX-13FTX-0526-SM-5IFGS	Esophagus	12.6013	6.37091	0.300993	15.2105	14.0812	11.7314	4.68095	0.280992
GTEX-WFON-0005-SM-3NMC9	Blood	15.4807	1.53103	0.061002	15.9115	3.68101	21.3713	0.0109996	0.34099
GTEX-O5YV-2026-SM-26GMK	Muscle	2.50099	0.811015	0.061002	2.14102	4.87094	1.32097	0.160996	0.0710018
GTEX-ZLV1-1326-SM-4WWER	Colon	13.7209	8.76103	0.0209995	6.70111	14.771	4.05106	0.891002	0.821026
GTEX-ZF28-0226-SM-5S2OE	Adipose Tissue	8.92097	18.1111	0.061002	17.6207	16.7014	14.5113	2.92108	0.0309997
GTEX-YECK-0005-SM-4W217	Blood	1.25102	1.45095	1.141	6.12114	1.65095	4.87094	0.171004	1.56103
GTEX-ZF29-1526-SM-4WKF7	Stomach	3.85091	2.18102	0.121002	4.31093	9.01108	8.57122	1.36103	0.0710018
GTEX-13W3W-2526-SM-5SI9P	Adipose Tissue	11.241	11.6213	0.0209995	16.9111	17.3914	16.2414	1.58096	0.0909993
GTEX-ZF2S-3026-SM-4WWCH	Liver	5.14083	6.56093	0.251007	3.05104	8.58073	1.07103	3.14095	0.311003
GTEX-ZAK1-2526-SM-5S2N7	Uterus	6.54095	42.9296	0.141003	25.2918	8.4808	4.4611	1.29101	0.000999989
GTEX-WZTO-0326-SM-4PQYZ	Testis	5.28096	4.42108	0.000999989	0.781003	5.65098	3.13095	3.17092	0.0810019
GTEX-RNOR-2426-SM-48FDY	Pituitary	6.91103	3.34105	0.100998	3.9109	12.7613	2.08103	0.441015	0.190994
GTEX-144GL-0011-R6a-SM-5P9HW	Brain	3.93101	1.31103	0.0909993	0.93103	4.54097	0.460988	0.260996	0.0209995
GTEX-N7MS-2625-SM-3LK77	Pituitary	8.201	5.52089	0.410997	5.78092	12.4209	5.21114	0.950989	0.171004
GTEX-13JVG-1426-SM-5MR4W	Lung	7.9508	62.5614	1.44103	45.8103	13.1109	15.7611	0.980983	9.55132
GTEX-13OW6-0005-SM-5NQ9Z	Blood	5.73105	10.6812	7.29092	27.7305	6.26103	16.1807	0.921017	8.4908
GTEX-11O72-2326-SM-5BC7H	Thyroid	4.47101	25.1102	0.431012	24.1508	9.93073	38.8219	1.801	0.0810019
GTEX-ZP4G-0006-SM-4WWE6	Blood	46.1417	28.1215	1.34099	65.8403	15.0908	58.941	0.0309997	2.50099
GTEX-13FHP-2926-SM-5IJG9	Brain	7.20101	0.521016	0.0509985	0.960994	11.7111	0.811015	0.141003	0.000999989
GTEX-WL46-0011-R10A-SM-3MJFQ	Brain	3.89089	2.07096	0.0309997	1.41098	4.09113	0.260996	0.271007	0.150998
GTEX-WXYG-0826-SM-4ONC7	Pancreas	3.26097	3.82113	0.150998	6.71087	8.12124	7.52087	1.81102	0.271007
GTEX-13S7M-3026-SM-5S2QQ	Brain	8.31087	0.300993	0.0509985	1.27103	13.131	1.17097	0.0509985	0.000999989
GTEX-S33H-1626-SM-4AD68	Liver	6.49082	3.29094	0.231006	5.88116	13.4208	2.22099	1.08103	0.671007
GTEX-W5WG-0008-SM-4KL25	Skin	30.7518	70.8698	0.000999989	10.6708	28.0903	12.0111	13.2012	0.0710018
GTEX-145MH-0011-R11a-SM-5P9HQ	Brain	5.86081	0.980983	0.000999989	1.19102	11.4812	1.02101	0.110998	0.0509985
GTEX-13OVL-0011-R6a-SM-5L3G4	Brain	4.66087	4.18086	0.0209995	0.841013	4.35086	0.491002	0.401007	0.0810019
GTEX-13RTJ-0726-SM-5QGQN	Heart	1.71095	1.81102	0.000999989	4.90108	2.60106	1.32097	0.210998	0.0810019
GTEX-WRHU-0726-SM-3MJFL	Blood Vessel	7.44102	35.9919	0.0410009	13.071	15.9911	5.77091	2.23101	0.000999989
GTEX-13OVI-2126-SM-5KM3U	Colon	8.85075	9.90118	0.000999989	4.52087	19.9608	3.88092	1.95098	4.41098
GTEX-ZT9W-1426-SM-4YCD2	Esophagus	8.41113	5.14083	0.0209995	3.31108	13.7114	2.58095	1.19102	0.0810019
GTEX-ZT9W-0003-SM-4YCE6	Blood	17.2413	62.3708	0.000999989	6.71087	4.64089	7.6412	0.0909993	48.641
GTEX-XAJ8-0126-SM-47JYG	Spleen	19.3505	14.1615	3.63108	50.1508	17.6305	37.2999	0.891002	15.1905
GTEX-1477Z-0011-R3b-SM-5PNX9	Brain	1.70102	1.48103	0.000999989	0.740977	2.28105	0.431012	0.190994	0.0309997
GTEX-13SLW-2926-SM-5Q5BQ	Pituitary	8.6608	2.47101	0.000999989	1.97096	12.0913	1.44103	0.311003	0.000999989
GTEX-QDT8-0426-SM-32PKZ	Blood Vessel	6.30108	28.6607	0.000999989	11.4011	20.8909	2.72093	4.97088	0.000999989
GTEX-13NZ8-0926-SM-5MR3U	Adipose Tissue	9.24069	12.2313	0.100998	29.692	15.8213	22.6306	2.70101	0.121002
GTEX-OXRO-0326-SM-33HBM	Lung	5.89095	76.8301	0.710989	38.3299	6.42101	12.7013	6.09109	0.980983
GTEX-13X6K-0326-SM-5Q5D6	Muscle	2.65093	3.45097	0.000999989	2.58095	6.14111	1.59096	0.32099	0.0410009
GTEX-ZF3C-1326-SM-5A5MF	Blood Vessel	4.42108	46.3308	0.121002	35.7904	12.6214	17.5014	1.66106	0.0309997
GTEX-X261-0011-R7A-SM-4E3JJ	Brain	2.14102	2.68105	0.0309997	2.01098	2.73094	0.280992	0.160996	0.0109996
GTEX-NPJ7-0011-R8a-SM-2I3G2	Brain	5.25103	1.57102	0.000999989	4.7509	5.55082	1.98096	0.980983	0.0410009
GTEX-ZYVF-2826-SM-5GIDK	Colon	7.82125	16.451	0.061002	17.561	7.82125	3.82113	1.20097	2.57095
GTEX-WHSE-0006-SM-3NMBW	Blood	3.0409	0.521016	0.361007	6.35107	0.600985	2.92108	0.0109996	0.600985
GTEX-X261-0011-R11A-SM-4E3JY	Brain	5.98106	1.41098	0.0209995	3.60101	11.9613	0.32099	0.160996	0.0810019
GTEX-12ZZZ-0011-R4b-SM-5DUV7	Brain	0.801014	1.00097	0.000999989	1.04102	1.67099	0.280992	0.280992	0.0209995
GTEX-XBEC-0626-SM-4QARY	Muscle	2.14102	1.27103	0.000999989	1.57102	3.75106	0.980983	0.0710018	0.0410009
GTEX-132AR-1926-SM-5EGK5	Heart	6.88091	4.94099	0.0810019	8.56112	4.48094	1.70102	0.880992	0.130996
GTEX-V955-0726-SM-3GAFG	Heart	2.12093	2.92108	0.0309997	3.15098	3.92094	1.04102	0.480997	0.150998
GTEX-12WSN-0726-SM-5GCMS	Thyroid	7.20101	10.7607	0.0710018	12.7312	18.6914	20.8605	1.56103	0.0309997
GTEX-PSDG-1326-SM-48TD2	Esophagus	15.7513	15.0407	0.231006	25.0511	16.8409	18.1513	4.38112	0.201005
GTEX-1399S-1526-SM-5P9JC	Esophagus	15.7513	4.95093	0.0209995	4.91094	16.1807	3.29094	0.600985	0.190994
GTEX-11WQC-0011-R11b-SM-57WD6	Brain	4.13103	0.34099	0.000999989	0.480997	10.3812	0.371002	0.121002	0.000999989
GTEX-TMMY-1326-SM-4DXU9	Pancreas	3.24091	1.26103	0.000999989	3.17092	5.4009	4.73085	0.811015	0.0209995
GTEX-X4EO-0326-SM-3P5YO	Skin	9.69069	11.7811	0.0410009	4.231	16.6714	8.08081	1.10099	0.910986
GTEX-XUJ4-2826-SM-4BOQ2	Blood Vessel	8.6512	14.4811	0.000999989	15.9413	15.771	5.33098	0.580996	0.0410009
GTEX-XLM4-0011-R4B-SM-4AT5C	Brain	4.35086	2.53099	0.0309997	5.03084	5.57086	0.921017	0.231006	0.0410009
GTEX-R3RS-0126-SM-3GIJL	Skin	7.47099	15.5409	0.201005	8.78109	22.6415	16.9205	0.721014	1.241
GTEX-ZV6S-0826-SM-5NQ6Z	Spleen	11.3814	9.83074	2.89106	70.2633	18.7615	41.5622	0.561011	5.14083
GTEX-ZDYS-0626-SM-5J2N5	Thyroid	11.4209	16.6806	0.121002	12.3514	17.8209	29.2406	1.62102	0.0309997
GTEX-11DXX-0926-SM-5H112	Pancreas	2.54101	1.10099	0.0109996	4.27108	5.87097	5.64119	0.861009	0.0209995
GTEX-1399S-0826-SM-5KM23	Heart	6.29105	2.23101	0.100998	4.07105	5.02109	3.4909	0.361007	0.251007
GTEX-ZVZQ-0008-SM-51MSK	Skin	28.6706	45.371	0.000999989	9.65114	13.1109	5.05111	1.83096	0.160996
GTEX-1399U-0926-SM-5IFHA	Pancreas	3.29094	3.11105	0.0209995	4.86116	7.57108	4.50086	1.54104	0.0810019
GTEX-11P82-1226-SM-5HL5P	Colon	4.07105	19.7804	0.110998	50.7804	16.531	11.1209	1.05103	0.220997
GTEX-YFC4-0011-R11a-SM-4SOK6	Brain	8.0211	0.901001	0.0410009	1.62102	12.4909	1.66106	0.451	0.0810019
GTEX-ZXG5-0005-SM-57WCN	Blood	8.38087	24.9005	5.59098	38.471	6.60107	21.3106	0.35099	4.93107
GTEX-131XW-0526-SM-5PNXZ	Adipose Tissue	8.35072	23.2716	0.130996	20.3506	13.0611	17.9014	2.01098	0.821026
GTEX-ZGAY-1526-SM-4WWEO	Esophagus	13.7809	14.3612	0.0509985	4.26102	15.5409	4.00111	1.50098	0.330999
GTEX-12WS9-0726-SM-5FQT7	Thyroid	8.50081	11.7013	0.190994	9.06119	11.2808	27.4303	0.841013	0.121002
GTEX-13NZA-0011-R9b-SM-5MR5I	Brain	3.32096	4.05106	0.34099	7.8408	2.50099	1.52098	1.07103	0.100998
GTEX-11ZTS-1926-SM-5CVLA	Ovary	5.4009	28.6309	0.0710018	2.81103	7.54123	0.680987	3.38112	0.000999989
GTEX-ZTX8-0006-SM-4YCE4	Blood	24.2414	17.4409	0.231006	47.4521	8.87102	39.7422	0.0710018	1.03097
GTEX-OXRL-2126-SM-3NM98	Testis	9.54073	8.83114	0.061002	1.68098	5.58091	2.62097	7.7109	0.300993
GTEX-T6MO-0326-SM-32QOK	Breast	9.66118	13.4506	0.121002	13.5611	16.5115	8.97119	2.02104	0.641002
GTEX-X261-0011-R10B-SM-4E3JT	Brain	3.34105	3.03101	0.000999989	1.44103	4.19102	0.830988	0.220997	0.141003
GTEX-117YX-1426-SM-5H12H	Breast	10.3913	9.12105	0.0209995	14.461	17.0311	12.4011	1.211	0.000999989
GTEX-YJ8O-0226-SM-5S2NL	Blood Vessel	7.69115	19.0616	0.181005	8.81096	9.35087	3.31108	1.31103	1.48103
GTEX-Y8E5-0526-SM-57WBY	Nerve	13.1209	17.2115	0.441015	13.801	15.1107	7.9211	1.99101	0.300993
GTEX-11ZUS-0226-SM-5FQT8	Heart	2.66106	2.27096	0.0710018	2.82099	2.03101	1.77104	0.251007	0.220997
GTEX-Z9EW-1626-SM-5CVMN	Skin	13.3309	10.6612	0.150998	7.69115	21.321	13.951	0.680987	0.0810019
GTEX-11WQK-0005-SM-5O9AV	Blood	1.83096	4.53091	3.18104	11.631	5.15117	7.06113	0.160996	4.98088
GTEX-XMD2-0006-SM-4WWEG	Blood	5.65098	3.11105	1.35097	12.5412	3.10093	10.9412	0.0810019	1.06098
GTEX-12ZZX-1226-SM-5EGHS	Thyroid	7.72107	19.801	1.29101	20.4015	9.22085	19.9207	2.08103	0.210998
GTEX-XMK1-2226-SM-4B673	Adipose Tissue	8.6608	19.1013	0.110998	20.0704	18.8305	15.3408	3.34105	0.921017
GTEX-13N2G-2726-SM-5J1MG	Adipose Tissue	6.641	23.0709	0.280992	27.0602	17.8308	21.5617	2.60106	0.531006
GTEX-TMMY-1026-SM-4DXTI	Blood Vessel	13.9607	13.4106	0.0309997	7.7109	16.3407	2.75108	0.740977	0.110998
GTEX-XUJ4-0005-SM-4BOQ6	Blood	27.7516	16.6806	0.38101	46.1225	6.96103	39.4021	0.061002	1.08103
GTEX-11EI6-2426-SM-5PNVS	Stomach	2.71095	9.73108	0.0410009	11.2707	5.84094	5.13086	1.64103	0.0509985
GTEX-XOTO-0011-R3A-SM-4B64W	Brain	3.67107	1.70102	0.0209995	3.6609	5.05111	0.480997	0.150998	0.0810019
GTEX-ZP4G-1626-SM-57WGD	Small Intestine	11.0609	16.1012	0.171004	22.5507	18.8214	27.9912	1.97096	2.23101
GTEX-11EI6-0126-SM-5985R	Skin	9.89089	13.5714	0.061002	8.371	22.651	14.261	1.53103	1.17097
GTEX-11OF3-0006-SM-5O9CM	Blood	0.801014	1.27103	0.921017	4.52087	0.910986	2.66106	0.0209995	3.60101
GTEX-14A5I-1326-SM-5SIAQ	Blood Vessel	7.15078	11.521	0.061002	13.9907	7.66083	4.09113	0.99103	0.220997
GTEX-WY7C-0726-SM-4ONCB	Liver	7.05086	5.25103	0.000999989	5.11098	10.061	1.58096	2.18102	0.190994
GTEX-1445S-3026-SM-5O9BR	Brain	3.481	3.77088	0.0309997	12.0512	5.99101	1.12101	0.141003	0.0509985
GTEX-O5YT-1626-SM-32PK6	Muscle	1.59096	2.38105	0.000999989	2.18102	4.331	1.19102	0.150998	0.0810019
GTEX-13O3Q-0011-R2b-SM-5KM3K	Brain	4.45091	1.15101	0.000999989	2.42099	2.95099	1.28103	0.410997	0.110998
GTEX-13S86-1226-SM-5S2OA	Breast	17.5415	6.41078	0.000999989	21.3003	11.5011	12.0813	1.89094	0.000999989
GTEX-PVOW-0426-SM-5N9DW	Heart	2.34096	4.70111	0.110998	4.66087	3.80106	3.31108	0.401007	0.371002
GTEX-1314G-1326-SM-5BC6E	Skin	10.431	21.2104	0.141003	13.2608	13.611	11.6608	1.46104	3.00091
GTEX-145LV-0326-SM-5Q5BW	Heart	2.52101	1.30098	0.000999989	2.91097	3.36102	1.17097	0.181005	0.271007
GTEX-QCQG-1926-SM-2S1PI	Blood Vessel	8.61111	15.4411	0.000999989	10.1809	19.2315	1.63105	2.24093	0.000999989
GTEX-S33H-1826-SM-4AD65	Prostate	9.51102	15.711	0.390989	17.3805	16.0711	8.91108	1.33099	0.511002
GTEX-YB5E-1926-SM-5IFIG	Testis	11.331	7.34112	0.121002	2.30106	11.0909	1.69103	2.71095	0.0309997
GTEX-ZT9W-1126-SM-57WDR	Skin	7.20101	7.24106	0.000999989	7.31116	17.2808	12.8011	0.561011	0.150998
GTEX-WWYW-0011-R7A-SM-3NB3H	Brain	4.29096	13.0014	0.0109996	9.26121	6.76083	0.870973	0.421002	0.291002
GTEX-ZE7O-0011-R1a-SM-57WDM	Brain	0.410997	0.610981	0.0509985	0.580996	0.910986	0.181005	0.0710018	0.000999989
GTEX-YJ89-0011-R5a-SM-4V6GM	Brain	1.20097	3.0409	0.0309997	0.680987	1.881	0.171004	0.190994	0.0410009
GTEX-RTLS-0626-SM-5SI7Z	Thyroid	7.30103	9.11094	0.121002	17.8506	13.2912	31.6405	1.39098	0.000999989
GTEX-13FTX-0926-SM-5IFF7	Ovary	7.33095	23.3702	0.000999989	2.78099	10.5912	0.471	2.30106	0.000999989
GTEX-147JS-1026-SM-5S2MP	Adipose Tissue	3.74094	39.1109	0.390989	19.5406	12.3908	8.30109	2.76102	1.02101
GTEX-NPJ8-0126-SM-2YUNR	Skin	4.70111	5.32101	0.000999989	6.55093	16.5815	11.4114	0.600985	0.300993
GTEX-O5YV-0526-SM-2D7VZ	Lung	10.2213	20.1206	0.330999	22.4711	11.6012	11.7208	1.471	0.650987
GTEX-148VJ-0326-SM-5QGQE	Muscle	1.89094	2.32093	0.061002	3.06099	3.89089	3.43093	0.0410009	0.000999989
GTEX-XGQ4-0426-SM-4AT4I	Thyroid	9.10084	7.91122	0.100998	4.6709	16.8608	29.7806	1.57102	0.0909993
GTEX-U3ZN-0426-SM-4DXSH	Blood Vessel	10.8408	24.7216	0.330999	12.7507	19.2809	7.8408	2.46092	0.680987
GTEX-13O3Q-0011-R5b-SM-5P9H4	Brain	5.57086	3.54111	0.271007	1.511	3.9411	0.38101	0.34099	0.061002
GTEX-ZYFC-1626-SM-5N9EU	Esophagus	6.18083	18.0209	0.32099	20.9808	15.711	17.011	1.61105	0.621015
GTEX-12WSM-1426-SM-5GCPA	Colon	7.47099	7.32079	0.000999989	5.41102	12.711	1.95098	1.41098	0.100998
GTEX-12BJ1-0726-SM-5EGGF	Spleen	11.6108	11.9712	1.881	42.8701	23.4302	30.3516	0.471	5.57086
GTEX-147F4-0011-R6b-SM-5S2UP	Brain	2.53099	2.68105	0.000999989	0.260996	2.68105	0.0410009	0.210998	0.0209995
GTEX-1192W-0005-SM-5NQBQ	Blood	1.90105	2.211	1.08103	9.45122	1.60103	7.52087	0.0209995	2.09101
GTEX-13N2G-0011-R1b-SM-5MR3G	Brain	4.57097	4.48094	0.061002	3.37105	3.56104	1.19102	0.371002	0.0410009
GTEX-145MG-3126-SM-5Q5D3	Brain	4.35086	0.650987	0.100998	0.950989	13.0312	0.790973	0.160996	0.000999989
GTEX-YB5K-1626-SM-5IFIN	Breast	12.3411	6.50117	0.000999989	6.68117	12.6407	6.26103	0.950989	0.32099
GTEX-139UC-3026-SM-5IJE4	Pituitary	5.29085	2.611	0.0710018	2.11096	9.97074	1.67099	0.35099	0.0309997
GTEX-OIZG-1126-SM-2HMIU	Heart	2.56099	1.59096	0.0410009	3.28092	4.97088	2.02104	0.361007	0.371002
GTEX-R55F-1426-SM-2TF53	Adipose Tissue	6.09109	33.8809	0.000999989	28.1507	12.4511	13.101	2.64103	0.32099
GTEX-ZV6S-1626-SM-5NQ81	Adipose Tissue	10.4208	9.87103	0.000999989	27.5008	18.081	10.5013	2.63098	0.260996
GTEX-WZTO-0626-SM-4PQYY	Liver	3.30099	2.85106	0.680987	3.02095	6.79089	0.761017	0.701007	0.38101
GTEX-13X6I-2726-SM-5Q5ET	Colon	4.27108	21.2016	0.110998	25.7411	9.38073	7.30103	1.31103	4.05106
GTEX-ZVT4-0126-SM-51MS1	Skin	7.59105	19.5907	0.0209995	7.58106	18.081	8.68123	1.00097	0.410997
GTEX-PWCY-0526-SM-2I3ER	Heart	4.39085	2.211	0.000999989	2.92108	4.63092	2.47101	0.371002	0.171004
GTEX-ZVT2-1826-SM-5NQ8W	Breast	10.2411	13.2507	0.0710018	7.29092	11.3412	10.2809	1.881	0.531006
GTEX-WY7C-2226-SM-4ONCS	Testis	11.561	7.90081	0.0309997	2.79103	13.3207	7.72107	0.600985	0.100998
GTEX-11P82-0826-SM-5P9GU	Small Intestine	15.4614	14.1713	0.710989	26.9106	18.8906	37.1014	1.58096	4.37111
GTEX-ZYT6-1726-SM-5E44P	Heart	1.141	1.19102	0.0209995	2.29104	1.67099	1.67099	0.210998	0.210998
GTEX-12ZZX-0011-R11a-SM-5DUVJ	Brain	10.3711	1.00097	0.0710018	0.950989	10.4606	1.141	0.781003	0.0410009
GTEX-P78B-2526-SM-3P5ZY	Uterus	17.6807	23.0118	0.150998	13.2012	18.1916	7.46116	1.49102	0.061002
GTEX-SUCS-0226-SM-32PLQ	Thyroid	10.0512	6.70111	0.171004	9.41069	20.0412	25.8107	2.17106	0.190994
GTEX-13X6J-0126-SM-5QGOU	Skin	8.68123	10.0109	0.0309997	3.17092	19.6915	7.94089	1.39098	1.49102
K-562-SM-5O98J	Bone Marrow	15.4711	0.710989	0.061002	4.42108	14.7905	0.34099	0.0410009	0.541
GTEX-11WQK-0226-SM-5EQLI	Heart	3.50108	7.46116	0.0209995	11.6108	10.091	2.99094	0.181005	0.190994
GTEX-148VJ-1526-SM-5Q5DU	Heart	1.61105	3.56104	0.000999989	5.6209	3.95095	3.41101	0.110998	0.32099
GTEX-W5X1-2626-SM-4LMI8	Adipose Tissue	7.93098	16.4715	0.220997	18.2105	15.6805	21.3003	3.43093	0.201005
GTEX-11EQ8-2826-SM-5N9C1	Brain	5.31106	1.78102	0.000999989	7.88112	15.5011	0.280992	0.100998	0.671007
GTEX-W5WG-1726-SM-4LMI5	Stomach	2.18102	0.960994	0.000999989	2.45105	5.03084	5.27109	0.410997	0.0309997
GTEX-XXEK-0426-SM-4BRVW	Esophagus	11.0809	8.84094	0.190994	8.87102	17.2605	5.53085	0.790973	0.251007
GTEX-11EQ9-2526-SM-5HL66	Adipose Tissue	9.11094	8.9507	0.000999989	17.3108	16.5115	14.3811	1.471	0.000999989
K-562-SM-33HC7	Bone Marrow	11.3012	0.880992	0.0109996	5.29085	14.5505	0.280992	0.0109996	0.311003
GTEX-13RTJ-0011-R3a-SM-5PNX7	Brain	2.68105	2.17106	0.000999989	3.21095	5.39118	1.211	0.371002	0.0209995
GTEX-ZAB5-0526-SM-5CVMU	Spleen	14.2215	14.671	4.49089	36.5298	14.3911	26.5603	2.77099	2.02104
GTEX-11EM3-0126-SM-5985K	Thyroid	9.70078	9.69069	0.0410009	9.00109	16.6714	20.1513	1.93094	0.0710018
GTEX-145MI-0626-SM-5SI8S	Skin	7.31116	32.3815	0.160996	5.86081	17.6905	8.51083	1.70102	0.701007
GTEX-T6MO-1626-SM-32QOM	Skin	7.79095	7.2511	0.000999989	4.66087	20.5804	10.3009	0.410997	0.000999989
GTEX-Y5V6-2126-SM-4WWFX	Breast	12.6013	5.97111	0.0410009	21.8112	14.091	14.0306	1.32097	0.150998
GTEX-PX3G-0426-SM-48U1C	Blood Vessel	16.8514	15.1705	1.05103	13.431	18.9313	9.52091	2.19102	0.621015
GTEX-XPVG-0526-SM-4B65N	Kidney	13.161	9.811	0.0309997	7.03085	15.4711	7.13098	1.56103	1.03097
GTEX-NFK9-1526-SM-3LK7B	Stomach	4.94099	3.14095	0.171004	4.51085	10.1908	6.67099	0.93103	0.150998
GTEX-X88G-0004-SM-47JZ6	Blood	15.0209	54.8302	0.061002	15.071	6.30108	11.541	0.0109996	78.3521
GTEX-XQ8I-1926-SM-4BOOK	Pancreas	2.17106	1.17097	0.000999989	4.91094	3.09106	3.081	0.66099	0.0209995
GTEX-145ME-0726-SM-5O9A3	Adipose Tissue	15.0908	19.5609	0.110998	17.8506	20.3506	13.9714	2.361	1.57102
GTEX-11ZU8-0008-SM-5S2VO	Skin	22.8307	27.2409	0.000999989	10.1908	11.6511	5.36099	1.68098	0.0309997
GTEX-14ASI-0011-R6a-SM-5S2UZ	Brain	3.29094	1.90105	0.0209995	1.09104	3.78108	0.0209995	0.220997	0.000999989
GTEX-ZG7Y-1626-SM-5S2NO	Adipose Tissue	7.93098	28.3406	0.0810019	19.3706	17.3108	15.4015	1.22103	0.160996
GTEX-14A6H-1326-SM-5NQBC	Esophagus	6.59101	4.52087	0.000999989	10.581	12.8509	13.611	1.41098	0.0209995
GTEX-12ZZY-0526-SM-5EQ5H	Blood Vessel	8.93087	20.0107	0.0810019	8.70111	15.3408	2.38105	1.35097	0.271007
GTEX-1211K-1826-SM-5EGJ2	Colon	8.55104	11.3711	0.0209995	7.55117	17.4711	5.51095	2.66106	0.761017
GTEX-QMRM-0826-SM-3NB33	Lung	15.711	27.3506	0.401007	32.7404	24.191	18.3105	7.46116	0.730978
GTEX-WFJO-0326-SM-3GIL3	Lung	8.85075	20.0607	0.641002	26.2001	19.4811	24.1006	6.98084	1.23097
GTEX-QESD-1626-SM-2S1RB	Muscle	1.92106	1.20097	0.0810019	3.0409	6.78101	1.16103	0.061002	0.251007
GTEX-13OW6-0011-R2a-SM-5L3HG	Brain	4.7509	1.62102	0.061002	2.81103	4.34092	1.211	0.571015	0.000999989
GTEX-13FTW-1726-SM-5KM2B	Stomach	7.22101	1.69103	0.121002	6.60107	10.2312	17.6905	1.36103	0.150998
GTEX-11EQ8-1426-SM-5EGJR	Testis	9.24069	6.03101	0.130996	2.70101	6.2208	1.90105	11.561	0.491002
GTEX-ZQUD-1726-SM-51MRQ	Muscle	2.89106	0.600985	0.000999989	0.93103	3.43093	0.251007	0.061002	0.0410009
GTEX-12C56-1126-SM-5FQTO	Esophagus	8.04114	6.09109	0.150998	7.99113	14.1105	5.50102	0.571015	0.491002
GTEX-WYBS-0426-SM-3NM9M	Blood Vessel	5.57086	15.7415	0.000999989	4.30108	14.6406	1.09104	0.571015	0.0410009
GTEX-WYJK-0326-SM-3NMA8	Nerve	10.4411	14.8707	0.000999989	13.9414	16.9404	8.101	1.16103	0.110998
K-562-SM-2D7VY	Bone Marrow	15.771	0.960994	0.000999989	5.08096	16.0011	0.480997	0.100998	0.271007
GTEX-144GM-1626-SM-5O9AG	Esophagus	5.65098	12.4909	0.160996	10.1008	30.3516	9.65114	0.491002	0.271007
GTEX-S95S-1626-SM-2XCDJ	Blood Vessel	7.43122	13.2811	0.000999989	8.11111	16.8807	3.99114	1.241	0.121002
GTEX-ZVP2-1326-SM-57WCE	Esophagus	10.4911	6.79089	0.0509985	7.94089	13.7409	9.9211	1.141	0.231006
GTEX-QV31-1626-SM-2S1QC	Blood Vessel	6.23116	23.5605	0.000999989	5.49112	16.5505	2.23101	2.31097	0.000999989
GTEX-W5X1-2826-SM-3GILM	Nerve	4.69101	20.3605	0.271007	14.9109	18.2611	9.30109	2.77099	0.390989
GTEX-13O3Q-2626-SM-5KM3S	Nerve	10.6111	22.4509	0.000999989	17.811	14.771	7.7109	1.89094	0.000999989
GTEX-ZG7Y-0006-SM-4WWEA	Blood	42.2096	3.70096	0.141003	30.1106	6.59101	39.1218	0.000999989	0.580996
GTEX-13OVL-3026-SM-5IJF1	Brain	8.68123	1.06098	0.121002	0.970971	12.681	0.970971	0.160996	0.0309997
GTEX-Y3I4-1626-SM-4TT7W	Stomach	6.9509	6.27102	0.201005	10.5407	9.08131	12.0211	1.46104	0.271007
GTEX-13SLX-0526-SM-5S2ON	Skin	13.4908	16.7316	0.100998	9.01108	22.0117	16.2515	1.64103	0.531006
GTEX-RU1J-0426-SM-46MUK	Esophagus	16.3509	10.8807	0.150998	7.13098	20.0704	4.19102	1.50098	0.38101
GTEX-148VI-1226-SM-5RQJR	Esophagus	8.99111	7.97122	0.100998	13.9714	19.2609	9.66118	2.22099	0.240999
GTEX-ZPU1-0726-SM-5HL6O	Heart	4.68095	5.03084	0.330999	3.50108	6.4509	1.36103	1.04102	0.260996
GTEX-S7SE-0526-SM-2XCD8	Blood Vessel	9.08131	15.9215	0.0410009	6.7309	14.421	2.69092	1.45095	0.491002
GTEX-ZPU1-1326-SM-57WE1	Esophagus	15.1705	17.2904	0.32099	7.57108	23.241	3.89089	2.98101	0.160996
GTEX-12ZZX-2926-SM-5GCOQ	Brain	3.88092	4.82089	0.061002	0.970971	4.92117	0.401007	0.35099	0.061002
GTEX-13FTW-0526-SM-5IFIP	Pancreas	1.99101	1.95098	0.0309997	4.45091	5.16118	5.85107	0.891002	0.0810019
GTEX-11ONC-3026-SM-5985W	Brain	5.42115	1.19102	0.061002	2.91097	11.5907	1.43098	0.311003	0.0309997
GTEX-ZLWG-0526-SM-4WWFB	Thyroid	14.3413	9.56126	0.0710018	10.5312	17.2413	20.7408	2.05096	0.0410009
GTEX-11DYG-1326-SM-5N9DO	Esophagus	9.86077	17.6513	0.110998	29.5114	16.8013	19.2009	2.56099	0.811015
GTEX-QV31-0126-SM-447BP	Spleen	13.5011	7.59105	2.63098	52.6405	18.9615	41.3009	0.821026	7.34112
GTEX-ZDXO-0126-SM-5S2ND	Breast	8.41113	16.5815	0.0810019	20.051	12.0913	8.47081	1.87099	0.150998
GTEX-XBEW-0006-SM-4AT4E	Blood	11.7013	5.57086	2.69092	24.9713	4.28086	17.221	0.0909993	0.821026
GTEX-XUJ4-1726-SM-4BONW	Adipose Tissue	9.24069	9.88129	0.141003	39.5416	22.991	12.8011	1.27103	1.68098
GTEX-14BMV-2226-SM-5RQHX	Stomach	3.70096	17.8209	0.921017	16.3215	10.6206	12.1014	1.17097	0.141003
GTEX-P4QT-1626-SM-5S2UR	Muscle	5.50102	1.131	0.000999989	0.950989	7.20101	0.830988	0.190994	0.0410009
GTEX-U8T8-0126-SM-3DB94	Skin	11.6608	11.8614	0.000999989	3.36102	23.1815	4.01111	0.220997	0.271007
GTEX-ZAB4-0626-SM-5CVN3	Lung	6.92109	45.5917	0.641002	27.1316	9.70078	13.8412	2.93101	3.63108
GTEX-X88G-0008-SM-47JWN	Skin	20.7408	57.9807	0.0309997	3.50108	15.9005	6.74117	4.15112	0.0909993
GTEX-OXRK-0226-SM-2YUN1	Skin	7.79095	3.9611	0.000999989	5.61116	17.0914	11.4613	0.891002	0.231006
GTEX-P4PP-3026-SM-3P61O	Blood Vessel	8.62127	21.4707	0.0410009	16.1012	17.0914	9.10084	2.20106	0.34099
GTEX-WYJK-1926-SM-4ONDP	Esophagus	17.8308	11.9513	0.150998	17.1615	17.8407	23.0006	5.19096	0.251007
GTEX-133LE-1426-SM-5IFH1	Small Intestine	10.9207	7.33095	0.361007	18.2408	16.2515	43.0219	2.741	2.38105
GTEX-11DXY-1626-SM-5H12L	Adrenal Gland	9.41069	25.8806	0.0710018	8.4908	9.27084	2.741	2.11096	0.190994
GTEX-Q2AI-0008-SM-48U2H	Skin	40.2719	58.4812	0.061002	19.7106	32.33	4.9909	3.99114	0.061002
GTEX-P4PQ-1626-SM-2HMKK	Muscle	3.55094	1.93094	0.0109996	2.80092	5.32101	1.77104	0.100998	0.0209995
GTEX-ZE9C-2526-SM-5IJDR	Skin	8.42105	11.2511	0.0509985	12.471	18.5906	15.0814	2.64103	0.880992
GTEX-XXEK-2026-SM-4BRVE	Heart	6.17098	12.2109	0.130996	5.28096	7.57108	4.30108	0.650987	0.061002
GTEX-11NSD-0526-SM-5A5LT	Pancreas	2.15099	1.01101	0.0410009	4.77103	3.34105	2.92108	0.680987	0.000999989
GTEX-13JUV-2826-SM-5LZWU	Adipose Tissue	6.67099	17.0914	0.0309997	26.9909	19.7516	12.5612	1.551	0.160996
GTEX-WHPG-1326-SM-4M1ZJ	Esophagus	13.2507	11.7208	0.99103	24.8504	15.3015	22.6306	2.14102	2.57095
GTEX-QVJO-0011-R1A-SM-2S1QI	Brain	5.50102	9.9908	0.0509985	5.46113	6.51109	2.91097	2.06094	0.000999989
GTEX-11P81-0126-SM-5HL5Y	Thyroid	12.9009	7.11123	0.190994	8.00111	17.0311	25.1712	3.01091	0.130996
GTEX-U3ZH-0326-SM-4WWDX	Heart	4.24099	1.63105	0.0410009	3.50108	4.38112	2.03101	0.311003	0.190994
GTEX-ZGAY-2226-SM-4YCCX	Vagina	12.8411	14.2412	0.271007	9.86077	18.6512	11.7713	3.00091	0.291002
GTEX-132AR-1126-SM-5P9GA	Thyroid	18.3016	15.8213	0.38101	16.1515	16.3407	24.6617	4.12102	0.491002
GTEX-ZTSS-0008-SM-4YCE8	Skin	29.7311	34.2801	0.000999989	10.0012	14.5415	5.02109	2.76102	0.130996
GTEX-W5X1-0226-SM-5CHTO	Pancreas	0.000999989	0.000999989	0.000999989	2.07096	0.000999989	0.000999989	0.000999989	0.000999989
GTEX-1399R-2726-SM-5IJBA	Skin	9.05114	8.29074	0.000999989	3.83094	17.7408	8.32125	0.630995	0.751008
GTEX-WOFM-1126-SM-4OOSB	Testis	8.32125	2.60106	0.0909993	2.11096	6.74117	2.89106	2.78099	0.181005
GTEX-Y114-1226-SM-4TT88	Stomach	7.94089	8.72104	0.0909993	10.0512	20.6605	2.43092	1.471	0.201005
GTEX-13D11-0526-SM-5LZYM	Adipose Tissue	12.1207	18.561	0.141003	16.0711	16.3113	12.3711	4.30108	0.770999
GTEX-XMD1-2926-SM-4AT42	Brain	5.41102	8.75071	0.000999989	13.161	7.58106	3.83094	0.821026	0.0309997
GTEX-1399R-0826-SM-5IJEL	Esophagus	10.7607	7.28082	0.210998	12.6407	11.8113	13.0014	3.46103	0.121002
GTEX-13VXU-1926-SM-5LU5J	Blood Vessel	5.17084	29.692	0.190994	15.5108	11.4011	7.72107	1.76101	0.291002
GTEX-11O72-0008-SM-5Q5DN	Skin	22.0713	32.6113	0.000999989	7.4009	16.0611	5.21114	4.02113	0.0509985
GTEX-145ME-1726-SM-5Q5EU	Skin	6.90097	6.47105	0.0209995	8.39075	21.6006	7.0411	0.870973	0.271007
GTEX-13NYS-0426-SM-5MR4X	Nerve	7.20101	9.7913	0.130996	14.441	9.31077	4.4009	0.641002	0.0509985
GTEX-131XH-0006-SM-5O98V	Blood	0.770999	0.66099	0.291002	2.841	0.801014	2.33092	0.0109996	0.220997
GTEX-13FTW-1226-SM-5LZZ1	Prostate	8.8012	14.3612	0.110998	8.11111	17.0205	4.73085	2.35104	0.220997
GTEX-N7MT-1126-SM-2YUNQ	Brain	3.43093	2.49096	0.000999989	7.9508	6.94079	2.86096	0.721014	0.000999989
GTEX-WHSB-0726-SM-4M1XQ	Pancreas	2.76102	2.50099	0.0209995	3.03101	6.641	5.89095	1.241	0.100998
GTEX-WHSE-0126-SM-3NMBT	Skin	10.0109	9.7412	0.061002	9.40091	8.52087	9.20106	0.580996	1.73099
GTEX-Y5V6-1926-SM-5IFIL	Adrenal Gland	13.7809	38.5297	0.0410009	6.28102	9.13117	2.34096	2.48096	0.431012
GTEX-S7SE-0011-R2A-SM-2XCDC	Brain	5.09083	2.06094	0.000999989	2.56099	4.78096	0.740977	0.610981	0.0909993
GTEX-13QBU-1126-SM-5LU44	Stomach	3.9411	2.77099	0.000999989	6.91103	14.0208	9.31077	0.501006	0.121002
GTEX-148VJ-2926-SM-5Q5DA	Pituitary	5.92083	3.25104	0.0209995	4.88108	19.7407	2.44105	0.0509985	0.061002
GTEX-Y3IK-1126-SM-51MSV	Esophagus	10.6413	10.3309	0.0209995	12.7312	7.06113	11.241	2.78099	0.0710018
GTEX-117YX-0726-SM-5GIET	Adipose Tissue	9.64112	28.3014	0.0909993	18.3207	18.1815	9.5712	5.28096	0.480997
GTEX-1339X-0726-SM-5L3FF	Adipose Tissue	18.6009	9.50114	0.0209995	9.36124	11.6012	6.66082	1.19102	0.141003
GTEX-139TS-2826-SM-5J1OO	Skin	10.5108	10.1408	0.0209995	3.7311	15.5808	8.60097	0.751008	1.98096
GTEX-WK11-1026-SM-4OOS8	Esophagus	11.1009	10.2312	0.0710018	16.1605	14.2215	18.4609	1.67099	0.121002
GTEX-13FLW-0011-R5a-SM-5LZX6	Brain	2.44105	3.31108	0.0909993	1.26103	3.16104	0.621015	0.210998	0.0810019
GTEX-VJWN-0626-SM-3NMAN	Blood Vessel	9.39114	14.4911	0.171004	12.301	20.6304	11.051	1.25102	0.830988
GTEX-R55F-1726-SM-2TF4R	Breast	8.05118	24.8315	0.000999989	19.0115	18.781	21.6411	2.33092	0.110998
GTEX-Y114-2526-SM-4TT8M	Muscle	3.78108	0.861009	0.000999989	1.72094	5.81105	0.671007	0.160996	0.0209995
GTEX-X4EP-0005-SM-3P5ZE	Blood	1.99101	2.64103	0.220997	7.19104	0.790973	2.76102	0.0109996	0.231006
GTEX-OIZI-1426-SM-3NB1T	Esophagus	15.1905	13.4106	0.100998	22.2217	17.0606	19.321	8.9507	0.701007
GTEX-WYJK-1226-SM-4ONCP	Blood Vessel	10.6612	11.4407	0.110998	7.80122	14.0306	1.98096	1.10099	0.431012
GTEX-U3ZM-0426-SM-59HKR	Lung	19.4905	19.1504	0.190994	25.091	22.1403	16.8713	3.02095	2.03101
GTEX-13FHP-0826-SM-5K7V5	Heart	3.29094	9.03109	0.220997	6.15091	4.4309	3.76096	1.211	0.630995
GTEX-T2IS-0426-SM-32QPE	Heart	1.16103	1.69103	0.0810019	2.65093	2.50099	1.74098	0.280992	0.34099
GTEX-117YW-0426-SM-5GZZZ	Heart	0.66099	2.11096	0.110998	2.37101	1.551	1.67099	0.141003	0.141003
GTEX-ZDTS-0526-SM-4WKH9	Muscle	2.83098	2.01098	0.000999989	0.980983	2.49096	0.901001	0.271007	0.000999989
GTEX-RWSA-2026-SM-47JX8	Prostate	5.65098	12.5612	0.181005	18.2813	15.8005	7.07093	1.241	0.150998
GTEX-13X6K-0011-R6a-SM-5P9K6	Brain	4.00111	4.44105	0.121002	2.48096	5.33098	0.891002	0.770999	0.061002
GTEX-QDT8-0011-R11A-SM-32PKD	Brain	5.10107	2.211	0.000999989	1.27103	18.8305	2.43092	1.31103	0.0509985
GTEX-13OVG-1426-SM-5K7VP	Colon	7.6412	14.261	0.0909993	24.8504	18.4213	18.3105	2.39098	0.32099
GTEX-Y111-0008-SM-4SOJ3	Skin	18.7316	55.2805	0.000999989	5.69107	11.6407	6.57094	3.74094	0.121002
GTEX-131XE-1926-SM-5IFER	Pancreas	2.81103	3.0409	0.0909993	6.42101	6.54095	6.07086	1.52098	0.0810019
GTEX-SJXC-0126-SM-2XCFF	Skin	8.79083	10.271	0.000999989	7.16119	23.2313	10.3209	1.41098	0.501006
GTEX-WQUQ-1426-SM-3MJFD	Heart	3.24091	2.211	0.0109996	3.72102	4.64089	2.43092	0.300993	0.680987
GTEX-XBED-2026-SM-4AT5D	Testis	12.8011	6.80078	0.061002	2.27096	8.6512	3.59104	4.30108	0.220997
GTEX-11UD2-0626-SM-5GU6L	Thyroid	11.9306	16.7316	0.190994	41.101	19.5514	30.1315	1.25102	0.0410009
GTEX-14ABY-0011-R4b-SM-5S2VN	Brain	4.2009	5.14083	0.0209995	0.93103	4.62098	0.401007	0.371002	0.0209995
GTEX-T2IS-1126-SM-4DM6Z	Nerve	12.631	16.8608	0.110998	10.581	17.1009	7.56112	3.43093	0.0410009
GTEX-XBEW-1026-SM-4QARV	Muscle	7.03085	0.390989	0.000999989	0.580996	4.6709	0.980983	0.130996	0.0109996
GTEX-131YS-3126-SM-5KLYT	Brain	3.84105	2.31097	0.0209995	1.41098	4.55105	0.740977	0.300993	0.0909993
GTEX-WRHU-1226-SM-4E3IJ	Heart	1.03097	1.39098	0.0109996	2.83098	2.161	1.77104	0.130996	4.05106
GTEX-11DXX-0826-SM-5GZZP	Blood Vessel	10.7212	25.5402	0.121002	11.2707	15.5711	6.78101	2.34096	0.630995
GTEX-OHPL-1326-SM-3MJGG	Adrenal Gland	11.4907	31.3719	0.0309997	7.94089	11.4312	1.95098	4.34092	0.330999
GTEX-S4UY-0926-SM-4AD6O	Bladder	11.041	16.3611	0.32099	17.3108	16.8304	22.3515	4.25099	0.000999989
GTEX-13G51-3126-SM-5IJG7	Brain	7.76077	0.69102	0.000999989	1.131	12.7807	1.38099	0.260996	0.0309997
GTEX-12126-0326-SM-5PNW3	Skin	9.70078	4.4611	0.0209995	5.39118	13.2406	5.97111	0.271007	1.20097
GTEX-XOTO-2826-SM-4B65I	Prostate	4.4009	21.4514	0.32099	17.8308	7.34112	3.78108	0.861009	0.000999989
GTEX-13N1W-0726-SM-5MR57	Lung	6.80078	47.1309	0.260996	25.9903	10.9011	6.93118	3.28092	3.98091
GTEX-12C56-1926-SM-5FQUG	Muscle	2.42099	1.511	0.000999989	1.26103	4.22104	1.08103	0.130996	0.061002
GTEX-ZYWO-2226-SM-5GZXR	Skin	13.3614	11.0709	0.0710018	7.57108	15.4507	6.34095	0.641002	2.23101
GTEX-11P81-0726-SM-5PNYH	Adipose Tissue	11.0809	16.0011	0.910986	16.9604	15.3408	15.2306	3.32096	0.600985
K-562-SM-5Q59U	Bone Marrow	13.0312	0.721014	0.061002	4.41098	12.5012	0.491002	0.000999989	0.590988
GTEX-PWCY-2026-SM-5Q5BF	Muscle	2.83098	0.751008	0.0209995	0.970971	4.48094	0.790973	0.0509985	0.0209995
GTEX-X585-0011-R8A-SM-46MUX	Brain	11.2309	2.07096	0.000999989	3.59104	7.17113	1.93094	0.921017	0.190994
GTEX-U3ZG-0008-SM-47JWL	Skin	21.4217	64.289	0.000999989	9.12105	25.1904	1.37097	16.9205	0.0710018
GTEX-Y5LM-1926-SM-5RQJH	Skin	9.66118	5.84094	0.000999989	7.1211	14.9006	10.9011	0.580996	0.110998
GTEX-139TT-0226-SM-5K7YH	Adipose Tissue	10.2312	26.8714	0.0309997	15.8708	20.5405	15.5409	2.45105	0.201005
GTEX-ZUA1-2626-SM-5NQ92	Skin	6.41078	8.00111	0.0710018	10.8513	11.3506	12.5812	0.960994	0.630995
GTEX-12WSM-0005-SM-5NQB3	Blood	1.02101	1.23097	0.471	5.28096	0.980983	3.79106	0.0309997	0.561011
GTEX-XUZC-0726-SM-4BOPH	Stomach	4.4611	0.980983	0.160996	6.37091	7.43122	10.8913	0.300993	0.000999989
GTEX-11NV4-2026-SM-5N9DG	Breast	6.39082	24.3205	0.330999	35.2903	20.0607	23.7507	3.62103	0.830988
GTEX-11I78-0005-SM-5N9GB	Blood	35.0611	22.8417	0.35099	49.2209	11.561	26.5806	0.000999989	3.25104
GTEX-139D8-2526-SM-5N9G3	Uterus	4.94099	28.9502	0.38101	18.4814	13.4814	5.78092	1.11103	0.0810019
GTEX-13PVR-1026-SM-5QGQW	Heart	3.12098	1.40104	0.000999989	1.58096	2.98101	1.60103	0.441015	0.0909993
GTEX-XBEW-0826-SM-4QASQ	Blood Vessel	6.31114	10.1211	0.000999989	1.97096	18.7615	0.600985	1.04102	0.000999989
GTEX-Y3I4-0526-SM-4TT6X	Heart	2.29104	1.68098	0.000999989	2.77099	2.45105	2.39098	0.330999	0.0309997
GTEX-YB5E-1526-SM-5IFIE	Small Intestine	15.4914	10.3913	0.300993	11.9306	23.5214	29.0607	5.59098	0.390989
GTEX-12WSL-0626-SM-5GCOY	Thyroid	10.481	9.87103	0.181005	17.6807	22.8307	23.6817	2.04103	0.0810019
GTEX-ZVT3-1626-SM-5GU66	Liver	4.37111	5.61116	1.42099	6.56093	11.0112	2.42099	2.08103	0.410997
GTEX-13O3O-3126-SM-5KM3H	Brain	3.0409	1.56103	0.000999989	1.73099	6.96103	0.610981	0.100998	0.0810019
GTEX-145LU-0526-SM-5O9AT	Lung	7.60106	81.1996	1.801	59.5405	15.7306	18.8606	1.38099	0.641002
GTEX-PLZ4-0126-SM-2S1OG	Skin	5.45092	9.71087	0.000999989	15.0407	13.951	12.0913	0.740977	1.82096
GTEX-13FTY-0326-SM-5L3DN	Nerve	9.95071	22.3113	0.000999989	20.4808	12.7807	4.63092	3.20095	0.000999989
GTEX-QCQG-0008-SM-48U2G	Skin	26.4317	39.8222	0.000999989	10.7913	17.7408	5.17084	9.39114	0.231006
GTEX-NPJ8-0011-R4a-SM-2HML3	Brain	2.88106	1.67099	0.000999989	5.14083	4.12102	0.751008	0.590988	0.0710018
GTEX-13VXT-0005-SM-5N9F3	Blood	45.9821	13.7609	0.0710018	33.4701	11.4209	32.3008	0.000999989	1.07103
GTEX-12ZZZ-0011-R3b-SM-5DUXK	Brain	2.46092	2.92108	0.000999989	1.02101	2.98101	0.260996	0.231006	0.0209995
GTEX-13IVO-0926-SM-5KLZP	Thyroid	10.631	11.1711	0.330999	18.2813	18.4404	16.2414	1.89094	0.280992
GTEX-ZYFG-1226-SM-5GIC7	Esophagus	8.73072	12.3608	0.061002	11.451	18.091	6.92109	1.32097	0.371002
GTEX-1399R-2126-SM-5K7WZ	Colon	15.0209	6.8709	0.121002	4.21111	13.071	2.17106	4.71089	0.0710018
GTEX-13FXS-0011-R6b-SM-5L3F7	Brain	3.99114	2.71095	0.0410009	2.28105	4.62098	0.751008	0.491002	0.000999989
GTEX-RWS6-2126-SM-2XCAV	Muscle	2.52101	1.66106	0.000999989	1.62102	7.17113	1.36103	0.311003	0.0309997
GTEX-11EQ9-0826-SM-5986Y	Esophagus	12.6109	10.3711	0.000999989	4.87094	16.661	3.98091	1.30098	0.0909993
GTEX-OHPN-0005-SM-2YUML	Blood	2.39098	3.29094	2.841	13.141	2.70101	8.40123	0.121002	0.811015
GTEX-13FTW-0926-SM-5J2NJ	Blood Vessel	12.5307	23.2716	0.0810019	8.88086	12.1014	6.14111	1.53103	0.561011
GTEX-QDVN-0626-SM-2I3FP	Thyroid	10.2213	9.29078	0.0209995	10.9412	18.9904	41.5104	2.11096	0.061002
GTEX-139TS-3126-SM-5LZWX	Brain	4.71089	1.20097	0.000999989	1.03097	8.94078	1.211	0.201005	0.0309997
GTEX-145ME-1326-SM-5O98Q	Uterus	13.5714	18.9116	0.130996	15.2105	25.3304	4.57097	1.25102	0.0309997
GTEX-13X6K-2126-SM-5O9D4	Esophagus	7.87074	15.4807	0.280992	19.5609	11.4812	17.0914	3.44093	0.0710018
GTEX-ZTPG-0006-SM-4YCFG	Blood	9.19086	8.61111	0.150998	23.291	5.51095	12.3514	0.000999989	1.54104
GTEX-X4XX-0011-R3B-SM-46MWK	Brain	4.74103	3.85091	0.0309997	3.00091	5.02109	0.970971	0.32099	0.141003
GTEX-YB5E-1726-SM-5IFJ3	Breast	8.36114	5.88116	0.0209995	15.2412	14.9109	6.07086	1.03097	0.0410009
GTEX-12C56-0526-SM-5FQST	Stomach	4.10107	10.6708	0.000999989	13.7714	18.6112	6.60107	0.93103	1.36103
GTEX-QDVJ-0005-SM-2TC5X	Blood	11.8113	7.41116	1.92106	32.3703	7.45082	22.0407	0.121002	0.921017
GTEX-T6MO-0003-SM-3NMAG	Blood	21.0712	56.1728	0.0109996	12.6109	5.31106	10.0408	0.141003	88.85
GTEX-Q734-1626-SM-48U1B	Uterus	16.8106	27.5408	0.671007	20.321	17.811	8.58073	1.471	0.181005
GTEX-12WSG-2126-SM-5EGJ7	Uterus	9.23108	33.5119	0.100998	12.8411	13.871	3.88092	2.02104	0.000999989
GTEX-13O61-1726-SM-5KM46	Prostate	12.961	23.1317	0.451	17.2306	21.1913	10.4208	2.26106	0.160996
GTEX-12WSK-0426-SM-5GCNS	Blood Vessel	7.211	11.9009	0.0309997	6.08096	13.081	2.06094	0.571015	0.0810019
GTEX-ZG7Y-1126-SM-4WWEZ	Esophagus	10.8913	5.10107	0.280992	12.6608	10.2411	11.2511	2.39098	0.300993
GTEX-ZF28-0011-R10a-SM-4WWEH	Brain	7.51097	5.3811	0.000999989	2.54101	3.77088	0.35099	0.260996	0.000999989
GTEX-ZVT2-0626-SM-5GICR	Vagina	15.7513	12.5708	0.251007	14.8511	15.0511	15.8807	4.69101	0.061002
GTEX-S32W-1326-SM-4AD5Q	Fallopian Tube	14.5113	26.3604	0.251007	11.5707	14.0413	10.8913	2.67104	0.280992
GTEX-XV7Q-2226-SM-4BRVY	Colon	16.1213	9.17113	0.000999989	7.1211	13.3614	2.81103	3.70096	0.300993
GTEX-113JC-2326-SM-5EQ4E	Skin	11.9613	17.4711	0.0309997	8.101	20.8417	10.831	1.84101	1.39098
K-562-SM-3P61Y	Bone Marrow	17.0004	0.69102	0.061002	4.35086	12.1106	0.35099	0.000999989	0.641002
GTEX-13D11-0426-SM-5LZYA	Adrenal Gland	12.7507	35.1122	0.000999989	6.72111	9.43093	2.68105	3.58109	0.781003
K-562-SM-4WWAK	Bone Marrow	14.6314	0.511002	0.0309997	4.0609	11.9207	0.171004	0.0109996	0.480997
GTEX-12WSB-0426-SM-5BC6H	Nerve	9.11094	21.7117	0.171004	22.0514	16.3611	10.8108	1.42099	0.0710018
GTEX-139TT-0011-R7b-SM-5J2MN	Brain	4.9909	2.72093	0.0810019	1.75103	3.90088	0.770999	0.181005	0.0209995
GTEX-11NSD-0326-SM-5A5LS	Lung	14.4911	25.2708	1.96101	28.1	16.451	24.4015	5.011	4.4309
GTEX-13CF3-1926-SM-5K7WF	Stomach	5.31106	2.12093	0.100998	5.44111	10.0109	13.101	0.571015	0.061002
GTEX-OHPL-0008-SM-4E3I9	Skin	20.2016	35.5999	0.000999989	7.94089	13.1912	3.72102	4.04097	0.0410009
GTEX-Y8DK-0011-R1A-SM-4RGLO	Brain	1.79104	0.790973	0.0109996	0.671007	1.93094	0.240999	0.121002	0.0209995
GTEX-13SLX-0011-R9b-SM-5SI6X	Brain	3.50108	2.94099	0.0209995	9.31077	3.29094	1.90105	2.29104	0.121002
GTEX-11TUW-2726-SM-5EQLC	Skin	14.1507	12.0913	0.0710018	7.68103	16.6114	14.971	0.680987	0.600985
GTEX-ZAJG-2826-SM-5HL8D	Uterus	3.62103	29.2609	0.550991	46.0618	11.8007	2.18102	1.16103	0.34099
GTEX-QV31-1026-SM-4R1K3	Prostate	11.7909	7.56112	0.150998	4.14106	16.3906	5.84094	1.41098	0.0410009
GTEX-OXRO-1226-SM-48TDL	Thyroid	10.3611	8.31087	0.600985	45.8198	14.461	17.3216	1.801	0.220997
GTEX-ZF29-2126-SM-4WWB8	Salivary Gland	9.12105	12.6407	0.000999989	9.7608	12.5812	11.9912	4.4309	0.0309997
GTEX-11WQC-0626-SM-5EQMF	Lung	6.70111	70.0931	2.80092	82.1393	10.9109	18.951	1.12101	2.31097
GTEX-XLM4-2026-SM-4AT4X	Heart	2.07096	11.0211	0.000999989	5.87097	2.9011	1.96101	0.390989	0.0509985
GTEX-13W46-1826-SM-5K7VA	Blood Vessel	5.48085	26.5217	0.130996	12.4606	9.55132	1.18099	0.650987	0.251007
GTEX-QDT8-0326-SM-32PL1	Nerve	8.06123	28.3505	0.291002	22.7217	21.4916	17.0406	2.75108	0.0209995
GTEX-RUSQ-1526-SM-2TF62	Skin	9.7913	8.32125	0.121002	20.8316	17.8605	11.7509	0.201005	0.0710018
GTEX-1211K-1226-SM-5EQ4N	Adipose Tissue	8.19077	10.3812	0.000999989	11.9414	17.6905	7.80122	1.34099	0.781003
GTEX-1313W-1426-SM-5KLZU	Heart	1.78102	2.51107	0.0810019	3.39097	3.06099	1.42099	0.32099	0.361007
GTEX-1399S-2726-SM-5KM22	Muscle	7.87074	1.53103	0.0509985	2.04103	9.38073	0.710989	0.0410009	0.000999989
GTEX-SIU8-0226-SM-2XCDS	Adipose Tissue	5.99101	35.3809	0.0509985	13.8106	16.951	11.2707	2.62097	0.600985
GTEX-N7MT-0126-SM-26GMB	Lung	8.77075	50.3423	0.850982	22.001	14.5213	9.09075	7.17113	0.000999989
GTEX-XQ3S-1126-SM-4BOPK	Esophagus	13.151	4.57097	0.0710018	13.1711	12.5708	13.5912	0.941022	0.150998
GTEX-QCQG-0426-SM-48U29	Pancreas	3.11105	3.79106	0.000999989	6.81116	8.91108	4.54097	2.59098	0.291002
GTEX-NL3H-0011-R6a-SM-2I3G8	Brain	3.30099	6.09109	0.000999989	2.30106	4.16091	0.471	0.521016	0.0209995
GTEX-14A5H-0826-SM-5QGPJ	Skin	7.06113	25.0112	0.100998	21.8506	21.6906	17.1306	0.751008	1.66106
GTEX-PWCY-0008-SM-48TE9	Skin	31.2006	67.2611	0.000999989	10.8611	27.5313	4.4611	7.78124	0.000999989
GTEX-11P7K-2226-SM-5GU56	Nerve	10.3711	14.2709	0.000999989	14.0208	13.8412	5.95087	2.17106	0.110998
GTEX-12WSN-1426-SM-5GCO6	Skin	11.2208	14.2313	0.0909993	19.2609	18.8214	14.8213	0.960994	0.110998
GTEX-11TT1-0526-SM-5P9JO	Esophagus	11.4011	8.83114	0.0410009	12.2008	11.3208	9.3308	1.03097	0.66099
GTEX-13OVJ-1826-SM-5KM2D	Colon	4.60085	19.641	0.061002	16.7316	10.5407	6.2411	0.99103	0.0309997
GTEX-ZVT2-0926-SM-5GICE	Heart	3.47112	5.37103	0.000999989	4.77103	6.09109	5.32101	0.590988	0.251007
GTEX-ZZPU-0326-SM-5N9BJ	Adipose Tissue	12.2814	32.652	0.371002	21.1913	16.3906	16.631	5.06092	1.01101
GTEX-ZVE2-1826-SM-51MRZ	Adipose Tissue	6.51109	15.8411	0.181005	22.4307	12.2508	11.7111	1.91096	0.160996
GTEX-P44G-0011-R7A-SM-2I3F9	Brain	2.96103	3.16104	0.0109996	7.63115	4.4009	0.190994	0.160996	0.0509985
GTEX-QVJO-0011-R5A-SM-2S1QM	Brain	4.55105	10.6111	0.061002	4.0609	6.18083	1.04102	1.05103	0.130996
GTEX-ZAB4-1926-SM-57WD8	Blood Vessel	8.54097	14.7905	0.000999989	3.081	14.9513	0.721014	0.721014	0.0410009
GTEX-13SLX-0926-SM-5S2NM	Heart	2.13095	13.8106	0.0309997	10.9011	6.18083	3.69097	1.511	0.260996
GTEX-RNOR-0126-SM-2TF57	Skin	6.201	8.04114	0.100998	8.56112	17.6611	10.9914	0.410997	0.35099
GTEX-144GL-0011-R3a-SM-5P9HP	Brain	3.68101	0.641002	0.0109996	0.710989	4.07105	0.471	0.410997	0.0309997
GTEX-NPJ8-1526-SM-26GMH	Brain	4.28086	1.68098	0.000999989	5.53085	5.51095	0.34099	0.761017	0.121002
GTEX-YFC4-0008-SM-4RGM3	Skin	28.3819	80.9186	0.000999989	10.7913	27.1918	9.49126	10.8513	0.110998
GTEX-139UC-0011-R9a-SM-5K7W7	Brain	4.41098	7.83102	0.271007	8.77075	4.93107	2.91097	2.47101	0.190994
GTEX-11O72-2926-SM-5BC4V	Brain	2.53099	4.54097	0.0810019	10.0812	5.36099	0.471	0.160996	0.0909993
GTEX-ZF28-0726-SM-4WKFU	Lung	7.18108	41.7701	0.99103	55.7809	14.401	17.6012	3.43093	1.16103
GTEX-X4EP-0008-SM-4PQYO	Skin	15.3706	41.8513	0.000999989	8.41113	15.1212	3.7311	4.88108	0.0909993
GTEX-12WSD-1626-SM-5GCNR	Pancreas	0.880992	0.66099	0.0410009	3.611	2.71095	2.82099	0.330999	0.000999989
GTEX-13CF2-0011-R8b-SM-5IJCX	Brain	3.35102	1.68098	0.0710018	1.41098	3.87098	1.28103	0.511002	0.0309997
GTEX-13PVQ-0526-SM-5LU8Q	Blood Vessel	6.17098	28.9101	0.0710018	8.57122	20.5704	3.22098	1.25102	0.721014
GTEX-14E6C-0226-SM-5S2N3	Adipose Tissue	6.25106	29.4215	0.110998	21.4812	9.31077	9.8512	1.07103	0.650987
GTEX-14E6C-2626-SM-5RQJP	Thyroid	4.47101	8.03111	0.130996	15.6208	28.6011	21.4707	0.38101	0.110998
GTEX-QDVN-2426-SM-2S1Q4	Muscle	3.37105	2.51107	0.000999989	5.32101	9.23108	2.9709	0.271007	0.121002
GTEX-1211K-0326-SM-5FQT1	Blood Vessel	15.9712	11.8408	0.100998	9.87103	10.8611	2.70101	0.521016	0.150998
GTEX-ZAJG-0626-SM-5HL8X	Breast	8.27122	20.8114	0.0509985	16.2211	15.1705	8.08081	1.06098	2.70101
GTEX-13D11-2026-SM-5IJBK	Esophagus	12.4209	9.39114	0.0509985	7.32079	16.5012	5.15117	1.38099	0.541
GTEX-XXEK-1826-SM-4BRVC	Colon	12.1308	7.69115	0.000999989	6.51109	18.5211	3.3311	3.43093	0.231006
GTEX-11I78-1326-SM-5PNY9	Colon	14.1007	11.0112	0.000999989	6.17098	30.1817	2.32093	1.67099	0.541
GTEX-12WSK-1526-SM-5CVNO	Small Intestine	7.05086	9.20106	0.0509985	10.8408	14.0208	8.30109	1.23097	0.251007
GTEX-V1D1-1926-SM-4JBGX	Prostate	6.71087	5.85107	0.171004	6.89094	12.8207	7.30103	1.77104	0.0209995
GTEX-139TT-0126-SM-5K7Y5	Skin	13.1912	18.4315	0.201005	4.64089	22.6306	9.93073	1.36103	0.401007
GTEX-13W3W-2126-SM-5K7UX	Colon	12.0211	14.6112	0.0209995	15.0605	17.1116	9.9211	1.77104	0.451
GTEX-11PRG-2026-SM-5GU5F	Colon	4.41098	20.4609	0.190994	13.6914	7.98117	5.19096	1.941	5.0711
GTEX-TMZS-0008-SM-47JWM	Skin	19.1305	77.4289	0.000999989	10.8213	24.3104	24.8504	9.6311	0.35099
GTEX-11OF3-0011-R7a-SM-57WCG	Brain	3.67107	2.24093	0.0410009	1.75103	2.82099	0.821026	0.35099	0.141003
GTEX-132AR-0526-SM-5J2MJ	Adipose Tissue	20.4709	19.7311	0.220997	25.6609	13.4413	8.101	5.77091	0.721014
GTEX-T5JW-0726-SM-4DM6D	Cervix Uteri	10.5707	22.0316	0.210998	15.5711	13.8614	16.7014	2.58095	0.240999
GTEX-ZTPG-1426-SM-51MT3	Liver	7.03085	7.30103	0.231006	10.0812	9.6311	2.22099	0.701007	0.240999
GTEX-14H4A-0226-SM-5SI6Q	Adrenal Gland	13.1209	16.3011	0.100998	5.27109	9.78112	1.63105	5.39118	0.501006
GTEX-NPJ8-1826-SM-2YUNC	Blood Vessel	8.28097	18.7914	0.061002	11.3609	17.8209	2.9011	1.22103	0.000999989
GTEX-13OVL-1426-SM-5IJC1	Muscle	2.94099	1.90105	0.000999989	1.52098	3.16104	1.131	0.511002	0.311003
GTEX-12584-0011-R6a-SM-5NQ7C	Brain	1.12101	1.11103	0.0309997	3.82113	1.63105	0.110998	0.121002	0.0509985
GTEX-NPJ8-0007-SM-2D7VX	Blood	3.06099	0.621015	0.0209995	4.96089	0.390989	2.40094	0.0109996	0.0309997
GTEX-ZAB4-0826-SM-5LU9D	Liver	3.15098	7.27123	0.181005	15.2211	9.21127	4.11103	0.701007	0.0509985
GTEX-13N1W-0011-R5b-SM-5MR5Q	Brain	4.68095	10.341	0.431012	8.32125	8.27122	1.881	0.580996	0.850982
GTEX-11TUW-1326-SM-5EQKV	Esophagus	8.83114	9.8008	0.0509985	12.9412	14.2709	20.2704	1.52098	0.471
GTEX-132AR-1326-SM-5K7YC	Blood Vessel	18.7004	17.3709	0.0909993	14.6507	9.98111	3.29094	2.73094	0.121002
GTEX-13CF3-0426-SM-5IJEU	Lung	14.3711	43.3001	0.150998	47.5707	14.6314	24.1609	2.31097	4.44105
GTEX-111FC-2526-SM-5GZXU	Skin	6.1309	7.08123	0.0810019	9.53082	10.7809	16.1314	0.781003	0.150998
GTEX-131YS-2226-SM-5P9G8	Ovary	6.81116	41.0213	0.0209995	2.95099	6.78101	1.06098	1.64103	0.0209995
GTEX-VUSH-0008-SM-47JWK	Skin	17.6415	37.1606	0.000999989	8.22092	19.1411	7.81096	7.33095	0.0309997
GTEX-ZUA1-1526-SM-59HLS	Breast	6.65113	13.5011	0.0410009	26.5015	17.2509	21.7614	3.30099	0.521016
GTEX-13D11-0326-SM-5LZXX	Lung	17.3914	24.4405	0.311003	24.6514	16.0111	18.2408	6.31114	1.511
GTEX-13QBU-0926-SM-5K7WQ	Esophagus	7.20101	6.85093	0.000999989	6.97117	14.8913	3.26097	1.11103	0.130996
GTEX-11NSD-2026-SM-5HL5U	Muscle	5.75095	1.62102	0.0410009	0.830988	3.18104	0.600985	0.171004	0.0209995
GTEX-11ZTS-0011-R1a-SM-5BC71	Brain	1.511	2.361	0.100998	3.26097	2.56099	0.610981	0.600985	0.110998
GTEX-WY7C-1726-SM-4ONCC	Stomach	5.85107	3.46103	0.34099	8.99111	13.3309	23.2813	2.94099	0.280992
GTEX-12WSL-2826-SM-5LZWL	Nerve	9.67123	10.6708	0.000999989	17.6207	16.0912	10.5707	0.650987	0.0410009
GTEX-145LS-0011-R1b-SM-5PNUP	Brain	2.53099	3.6609	0.0410009	7.18108	2.71095	2.01098	0.590988	0.121002
GTEX-UJMC-0526-SM-3GAE3	Heart	3.16104	2.361	0.000999989	3.81108	6.641	2.91097	0.32099	0.0909993
GTEX-11GSP-0011-R5a-SM-57WBE	Brain	4.19102	9.1413	0.181005	13.7609	5.21114	0.38101	0.641002	0.371002
GTEX-139T6-1026-SM-5IJGC	Small Intestine	8.72104	9.48074	0.171004	16.6714	17.2509	28.9502	2.94099	0.501006
GTEX-YJ89-0008-SM-4RGM4	Skin	21.3816	45.2517	0.000999989	9.34115	12.9206	5.73105	3.78108	0.100998
GTEX-X15G-0426-SM-4PQZ6	Heart	5.70094	1.95098	0.130996	2.48096	3.07098	2.01098	0.141003	0.150998
GTEX-PLZ5-0326-SM-3P614	Adrenal Gland	21.2516	10.1113	0.0410009	6.16115	9.7913	3.12098	2.77099	0.32099
GTEX-WHPG-0626-SM-3NMBD	Adipose Tissue	7.13098	16.1314	0.220997	26.251	18.0209	13.0412	4.24099	0.99103
GTEX-11WQC-0006-SM-5LZVP	Blood	4.77103	9.58116	6.19112	27.4018	5.17084	21.6906	0.471	11.9712
GTEX-QLQ7-1026-SM-447BB	Esophagus	15.4411	11.4708	0.0710018	10.5509	18.3512	10.2411	2.39098	0.960994
GTEX-1399R-1726-SM-5K7YJ	Heart	4.17102	3.081	0.0410009	3.36102	3.16104	1.211	0.841013	0.000999989
GTEX-111VG-1626-SM-5EGIO	Skin	12.1611	8.93087	0.121002	3.58109	14.2008	9.42113	0.511002	0.811015
GTEX-WL46-0426-SM-3TW8J	Nerve	10.0812	16.0411	0.150998	18.4916	20.6204	10.8611	2.70101	0.100998
GTEX-145MN-1426-SM-5SI9H	Pancreas	3.02095	1.50098	0.0209995	3.95095	5.75095	4.31093	1.61105	0.0710018
GTEX-YJ8O-0126-SM-5QGRG	Blood Vessel	5.96119	27.821	0.311003	11.1711	9.61109	7.32079	2.29104	0.100998
GTEX-QEG5-0626-SM-2S1PP	Blood Vessel	9.62109	24.3205	0.0309997	14.3115	27.7805	6.08096	0.941022	0.000999989
GTEX-SJXC-0526-SM-2XCFG	Muscle	2.22099	2.83098	0.000999989	1.76101	5.36099	0.801014	0.511002	0.000999989
GTEX-14A6H-2826-SM-5QGPM	Muscle	4.98088	2.49096	0.000999989	2.93101	5.76092	2.27096	0.501006	0.0810019
GTEX-14A5H-0226-SM-5S2VK	Blood Vessel	10.3812	22.7517	0.190994	24.181	16.4715	6.17098	0.610981	1.00097
GTEX-145MH-0011-R10b-SM-5PNUK	Brain	4.85106	3.11105	0.000999989	1.32097	4.07105	0.181005	0.171004	0.0810019
GTEX-WY7C-0926-SM-3NB34	Adipose Tissue	7.05086	19.4406	0.0309997	22.2402	16.3407	13.5808	6.17098	0.421002
GTEX-OIZH-1626-SM-2HMKI	Muscle	3.05104	0.630995	0.000999989	0.830988	4.73085	1.02101	0.0810019	0.0209995
GTEX-WI4N-0008-SM-4OOSV	Skin	25.5509	58.2223	0.0209995	8.58073	21.781	15.4807	11.3609	0.0810019
GTEX-13OVG-0005-SM-5P9HA	Blood	9.26121	2.93101	0.121002	18.4609	3.34105	12.1611	0.000999989	0.32099
GTEX-13S86-2326-SM-5RQK1	Muscle	4.64089	3.21095	0.000999989	3.06099	7.23102	1.91096	0.390989	0.0509985
GTEX-1339X-0326-SM-5K7Z8	Heart	3.28092	1.49102	0.0209995	3.68101	3.58109	3.00091	0.35099	0.0810019
GTEX-13O61-2026-SM-5J2M6	Testis	9.811	8.64101	0.0410009	2.05096	7.32079	3.47112	4.30108	0.0509985
GTEX-13QIC-0011-R11b-SM-5O9BU	Brain	5.53085	0.561011	0.000999989	0.950989	8.87102	0.410997	0.110998	0.0209995
GTEX-11ZTS-0526-SM-5CVL9	Muscle	1.25102	1.45095	0.0209995	1.71095	2.05096	0.590988	0.181005	1.03097
GTEX-12WSL-0326-SM-5CVMK	Adrenal Gland	11.0112	27.0002	0.0509985	7.46116	10.4606	2.06094	3.54111	0.521016
GTEX-13U4I-1826-SM-5IJD2	Muscle	5.09083	2.08103	0.0209995	2.15099	5.27109	1.84101	0.311003	0.110998
GTEX-11NV4-1926-SM-5N9D4	Salivary Gland	7.6412	2.93101	0.121002	14.8213	15.9115	12.6512	1.44103	0.280992
GTEX-SE5C-0726-SM-4BRWY	Thyroid	10.341	8.201	0.100998	9.42113	18.2206	28.4114	1.96101	0.0909993
GTEX-13JUV-2426-SM-5J1NS	Blood Vessel	7.81096	16.9311	0.061002	12.4909	12.9708	2.26106	0.950989	0.0710018
GTEX-12696-0326-SM-5EGL4	Thyroid	11.3208	8.18113	0.000999989	9.29078	19.4905	24.9005	1.86103	0.0309997
GTEX-Q2AG-0011-R1A-SM-2HMJI	Brain	5.52089	1.801	0.000999989	1.60103	3.59104	0.830988	0.521016	0.000999989
GTEX-13FHO-2826-SM-5K7ZA	Prostate	4.77103	26.3604	0.401007	22.7911	14.6609	13.1711	1.78102	0.100998
GTEX-14BIM-3126-SM-5Q5C7	Brain	5.76092	1.61105	0.0309997	4.331	8.93087	1.49102	0.130996	0.061002
GTEX-145LS-0011-R4b-SM-5S2UT	Brain	2.9709	4.4009	0.0209995	3.10093	2.93101	0.630995	0.511002	0.000999989
GTEX-XBEC-0006-SM-4AT5T	Blood	2.33092	1.44103	0.721014	7.51097	1.30098	5.27109	0.0410009	0.801014
GTEX-XXEK-0926-SM-4BRWH	Heart	2.67104	2.07096	0.000999989	3.41101	3.26097	1.00097	0.171004	0.311003
GTEX-T2YK-2226-SM-32QPT	Breast	3.87098	29.4215	0.130996	43.3722	13.0114	16.0211	2.91097	0.190994
GTEX-147GR-2926-SM-5RQIN	Pituitary	8.18113	5.63103	0.361007	5.99101	12.4407	4.09113	1.05103	0.291002
GTEX-12WS9-0426-SM-59HJW	Nerve	9.51102	18.6512	0.061002	27.0714	15.4807	9.83074	0.730978	0.061002
GTEX-13OW8-1026-SM-5J1NQ	Skin	9.59112	22.8417	0.110998	15.5614	18.2611	18.251	1.23097	0.980983
GTEX-11EM3-0001-SM-5Q5BD	Blood	17.6415	58.8308	0.0810019	8.03111	4.29096	7.49122	0.000999989	59.619
GTEX-X62O-0005-SM-46MV1	Blood	4.82089	13.1711	2.50099	28.5813	3.37105	14.7312	0.0410009	2.33092
GTEX-12696-0926-SM-5FQTV	Kidney	12.3411	7.97122	0.0209995	5.55082	13.0412	6.67099	2.08103	0.541
GTEX-WFON-0326-SM-3GIKX	Heart	1.72094	1.96101	0.0109996	3.47112	2.9011	1.53103	0.210998	0.130996
GTEX-13NYB-0326-SM-5IJDP	Heart	0.630995	21.8809	0.0209995	6.59101	3.11105	2.40094	0.941022	0.471
GTEX-13N2G-0011-R4b-SM-5MR54	Brain	7.2511	7.24106	0.0810019	3.31108	6.53098	1.41098	1.10099	0.960994
GTEX-VJYA-1526-SM-3GIJV	Skin	8.79083	25.6609	1.68098	12.0512	23.5605	11.541	1.99101	0.521016
GTEX-11OF3-1726-SM-5GU5Q	Prostate	5.90117	13.7609	0.130996	16.0812	14.3006	7.20101	1.56103	0.141003
GTEX-P44G-0011-R2A-SM-2XCD2	Brain	4.59097	2.02104	0.000999989	11.7811	4.91094	0.680987	0.110998	0.000999989
GTEX-ZF29-2226-SM-4WWB9	Adipose Tissue	10.6111	11.9712	0.141003	17.3312	19.0907	14.7813	1.72094	0.100998
GTEX-Y9LG-0001-SM-4VBRQ	Blood	17.6109	77.5686	0.000999989	8.71077	4.05106	7.69115	0.0810019	68.2189
GTEX-13PL7-2326-SM-5L3FY	Ovary	7.0109	30.3916	0.0209995	1.82096	8.00111	0.970971	1.76101	0.0710018
GTEX-139T8-0626-SM-5KLZX	Skin	9.55132	16.2414	0.0309997	7.2511	13.8412	10.3711	1.23097	1.131
GTEX-RU72-1426-SM-46MUF	Liver	2.86096	4.48094	1.00097	6.2411	9.83074	1.69103	0.550991	0.361007
GTEX-R55G-0926-SM-48FDN	Esophagus	12.2712	7.22101	0.0710018	4.85106	15.7012	3.05104	1.77104	0.210998
GTEX-1269C-2426-SM-5FQSN	Breast	8.0211	19.0207	0.201005	18.0409	14.7006	19.6016	2.09101	2.78099
GTEX-132QS-0526-SM-5IJC7	Heart	4.61106	4.01111	0.0410009	2.88106	5.80099	2.361	0.280992	0.150998
GTEX-S3XE-1726-SM-3K2AM	Skin	8.74101	6.16115	0.0810019	3.9611	18.871	8.54097	0.410997	0.401007
GTEX-WL46-0526-SM-3LK7W	Blood Vessel	5.64119	14.7905	0.0909993	7.57108	14.8008	1.96101	0.93103	0.150998
GTEX-14BMU-1226-SM-5S2OR	Skin	6.57094	10.4107	0.000999989	9.35087	18.3016	11.0311	1.26103	0.421002
GTEX-13SLW-0011-R4b-SM-5S2W2	Brain	2.64103	4.02113	0.0909993	2.23101	3.55094	1.03097	0.960994	0.0109996
GTEX-13JVG-0126-SM-5L3D3	Muscle	3.4011	4.70111	0.000999989	4.39085	4.19102	2.87109	0.34099	0.130996
GTEX-WXYG-1626-SM-4ONCR	Stomach	5.77091	1.511	0.231006	8.63083	9.6011	13.4609	0.69102	0.390989
GTEX-111CU-1126-SM-5EGIM	Skin	5.61116	6.37091	0.000999989	4.60085	20.9314	9.65114	0.361007	1.44103
GTEX-N7MS-0011-R10A-SM-2HMJK	Brain	4.09113	2.29104	0.0410009	1.15101	3.92094	0.431012	0.311003	0.110998
GTEX-14DAR-1926-SM-5S2NQ	Adipose Tissue	11.5107	13.0014	0.000999989	14.0111	24.5917	14.5012	1.57102	0.100998
GTEX-YEC4-1026-101814-SM-5P9FX	<not provided>	10.8408	5.23105	0.100998	18.1714	13.9907	16.3906	0.910986	0.950989
GTEX-XOT4-0826-SM-4B66Y	Adipose Tissue	8.41113	44.9516	0.160996	19.3908	14.5012	15.7808	6.85093	0.251007
GTEX-YJ8O-2226-SM-5IFHW	Breast	7.45082	24.701	0.110998	19.0709	16.7606	19.5108	4.27108	0.210998
GTEX-WHWD-0003-SM-4M1ZS	Blood	16.3906	61.0196	0.000999989	10.8011	5.41102	7.43122	0.0109996	61.6402
GTEX-ZVT3-0011-R8b-SM-57WDJ	Brain	2.50099	2.89106	0.110998	2.98101	3.80106	1.02101	0.69102	0.0209995
GTEX-132AR-1526-SM-5KM1L	Uterus	14.191	30.91	0.280992	14.7414	12.6109	2.52101	2.211	0.100998
GTEX-PWCY-0526-SM-5P9HG	Heart	3.51104	1.73099	0.0109996	2.26106	4.01111	2.19102	0.271007	0.220997
GTEX-117YX-2226-SM-5EGJJ	Adipose Tissue	9.58116	6.32121	0.0209995	15.2909	17.0311	13.6611	1.32097	0.000999989
GTEX-WYJK-0008-SM-4ONDV	Skin	20.1206	31.5004	0.000999989	6.37091	12.2814	10.9109	4.36112	0.0309997
GTEX-XYKS-1226-SM-4BRVI	Pancreas	6.82108	4.27108	0.0309997	8.43098	8.14097	6.51109	2.25105	0.441015
GTEX-Y3I4-0726-SM-4TT7M	Adipose Tissue	10.3812	11.0311	0.0509985	24.6514	14.0306	12.4511	2.04103	2.49096
GTEX-13X6K-0011-R10a-SM-5P9JR	Brain	6.32121	3.32096	0.000999989	1.38099	5.39118	0.600985	0.460988	0.171004
GTEX-11LCK-1026-SM-5A5KB	Skin	10.6413	10.8011	0.201005	6.27102	21.2516	9.3211	1.46104	0.531006
GTEX-ZVZP-1626-SM-5GIDJ	Esophagus	9.34115	10.1711	0.0410009	10.6008	15.5011	8.23118	0.610981	0.361007
GTEX-ZQG8-1026-SM-51MR9	Adipose Tissue	5.32101	9.58116	0.000999989	16.2707	11.4407	7.60106	1.85099	0.181005
GTEX-13PVQ-2726-SM-5L3H7	Colon	6.07086	13.2912	0.0710018	8.4908	19.7804	6.26103	1.42099	0.0410009
GTEX-14E6E-2226-SM-5SI6F	Nerve	8.17093	13.3911	0.000999989	22.2603	14.1615	10.7607	1.27103	0.0309997
GTEX-13G51-0011-R2b-SM-5LZXS	Brain	3.42096	2.64103	0.000999989	3.18104	4.13103	2.55107	0.491002	0.240999
GTEX-11TUW-0008-SM-5SI6S	Skin	17.2605	32.3501	0.000999989	6.34095	15.4314	6.8709	3.32096	0.000999989
GTEX-QMRM-1726-SM-2S1QG	Adipose Tissue	7.57108	9.91079	0.0710018	16.4111	21.9614	14.5707	2.75108	0.32099
GTEX-13OW7-0626-SM-5K7UD	Blood Vessel	8.23118	25.9507	0.0309997	5.00094	14.1811	1.77104	1.67099	0.000999989
GTEX-1192X-0726-SM-5987R	Heart	1.34099	5.82113	0.0309997	4.64089	3.89089	2.32093	0.571015	0.061002
GTEX-S3XE-0826-SM-4AD4U	Esophagus	11.3012	21.6306	0.121002	9.28113	23.9707	7.73124	1.801	0.66099
GTEX-QVUS-0426-SM-48FE3	Blood Vessel	8.59085	17.6415	0.240999	27.3316	10.4107	7.33095	0.600985	0.210998
GTEX-ZDYS-2526-SM-4WKGU	Pancreas	2.94099	1.20097	0.061002	3.3311	4.61106	3.34105	0.870973	0.000999989
GTEX-117YW-2026-SM-5N9BH	Esophagus	5.06092	15.2105	0.0509985	7.771	8.22092	5.77091	1.19102	1.33099
GTEX-13112-0011-R1b-SM-5HL7K	Brain	2.10103	0.550991	0.0309997	0.93103	1.29101	0.471	0.141003	0.000999989
GTEX-OOBK-0425-SM-3LK5O	Blood Vessel	11.241	14.1311	0.160996	17.2808	14.5505	4.56116	1.36103	0.201005
GTEX-S4Z8-0826-SM-4AD4J	Esophagus	13.9114	23.5214	0.0909993	23.5818	15.3015	20.0107	3.58109	1.04102
GTEX-11P81-2626-SM-5GU6T	Nerve	11.4708	14.1007	0.000999989	9.30109	12.1712	6.8709	2.15099	0.000999989
GTEX-Y5V6-2826-SM-4VDSF	Blood Vessel	6.68117	10.5707	0.000999989	9.12105	12.7206	2.86096	0.521016	0.000999989
GTEX-X5EB-1026-SM-46MVU	Esophagus	11.0211	7.86093	0.0410009	6.23116	17.8506	3.97099	0.541	0.891002
GTEX-1212Z-0826-SM-5EQ51	Blood Vessel	6.30108	18.4213	0.130996	10.9708	3.89089	0.671007	0.441015	0.201005
GTEX-1477Z-0626-SM-5NQB7	Lung	7.211	25.9201	1.63105	44.1212	13.2214	21.4009	2.34096	0.621015
GTEX-145MG-0826-SM-5Q5C2	Thyroid	11.891	18.081	0.251007	12.7206	16.8013	18.9313	2.87109	0.571015
GTEX-OIZG-0426-SM-3LK5W	Blood Vessel	9.46105	8.59085	0.000999989	7.55117	11.5907	2.64103	1.68098	0.0810019
GTEX-S341-1126-SM-4AD6T	Cervix Uteri	10.0408	18.5507	0.100998	10.271	20.6605	5.78092	1.77104	0.0909993
GTEX-ZF2S-1026-SM-4WWB1	Heart	4.04097	2.02104	0.100998	1.64103	2.94099	1.95098	0.460988	0.160996
GTEX-13OVH-1126-SM-5K7YP	Adipose Tissue	4.19102	44.2897	0.0710018	22.0912	6.44107	11.0709	2.01098	0.960994
GTEX-X15G-1926-SM-4PQZQ	Vagina	12.2907	25.5916	0.181005	23.1413	12.5908	12.1906	5.13086	0.0410009
GTEX-N7MS-0011-R5a-SM-2HMK8	Brain	3.42096	5.03084	0.0810019	2.49096	4.15112	1.27103	0.561011	0.100998
GTEX-13OVJ-0011-R10b-SM-5L3HT	Brain	3.55094	8.89072	0.061002	14.8008	8.86119	1.40104	0.730978	0.34099
GTEX-POMQ-1426-SM-3P61D	Ovary	11.9108	52.761	0.280992	4.54097	12.4511	2.38105	1.72094	0.110998
GTEX-ZYFD-3126-SM-5E44O	Pituitary	7.47099	27.5809	0.460988	27.0302	16.1213	2.88106	0.181005	1.59096
GTEX-11DYG-1926-SM-5H12I	Esophagus	7.39116	10.091	0.000999989	13.6308	15.4614	7.03085	1.38099	0.171004
GTEX-ZLV1-0005-SM-4WWAP	Blood	15.2507	4.4009	0.0909993	21.781	4.05106	23.4205	0.0109996	0.790973
GTEX-XV7Q-1526-SM-4BRWB	Uterus	13.081	31.2807	0.181005	12.2109	7.57108	6.56093	1.53103	0.121002
GTEX-N7MT-0126-SM-26GMS	Lung	0.830988	6.28102	0.190994	3.54111	2.52101	1.58096	2.64103	0.0209995
GTEX-QEG5-1426-SM-447AS	Esophagus	11.8507	7.20101	0.0810019	20.8215	12.9206	19.7804	1.63105	0.460988
GTEX-T5JC-0001-SM-3NMAK	Blood	11.7314	77.5524	0.0509985	6.56093	3.00091	4.15112	0.000999989	13.6507
GTEX-WQUQ-1926-SM-4OOSA	Liver	5.48085	3.89089	0.0410009	3.55094	8.41113	0.960994	0.210998	0.130996
GTEX-OXRL-0426-SM-3NM97	Blood Vessel	8.50081	17.4107	0.0710018	17.4215	16.1012	7.8408	1.54104	0.141003
GTEX-PWCY-0526-SM-5PNU8	Heart	4.50086	2.12093	0.0410009	2.30106	3.9411	1.69103	0.441015	0.130996
GTEX-PLZ4-0008-SM-48TE6	Skin	26.1312	50.0119	0.000999989	10.7913	20.9503	3.78108	7.67092	0.0309997
GTEX-WVLH-0011-R10A-SM-3MJFM	Brain	6.03101	3.4011	0.0509985	1.11103	6.15091	0.251007	0.330999	0.0209995
GTEX-X5EB-0726-SM-46MVR	Thyroid	11.6908	12.5507	0.000999989	12.7409	22.7013	25.9903	1.38099	0.110998
GTEX-13CZV-0006-SM-5P9IN	Blood	0.821026	0.35099	0.0109996	6.81116	0.260996	1.96101	0.000999989	0.0710018
GTEX-TMMY-0226-SM-33HBA	Skin	7.28082	8.93087	0.000999989	6.56093	17.5512	8.97119	0.671007	0.251007
GTEX-13VXU-0011-R3b-SM-5O9CU	Brain	4.73085	1.52098	0.000999989	0.870973	3.7311	0.531006	0.171004	0.210998
GTEX-12WSE-0011-R10b-SM-5P9JV	Brain	5.26086	2.35104	0.000999989	0.260996	4.29096	0.181005	0.100998	0.0209995
GTEX-ZP4G-1026-SM-4YCE1	Esophagus	13.0114	21.5707	0.0710018	16.5907	17.1615	15.1212	3.06099	0.35099
GTEX-OHPJ-1026-SM-2HMLE	Lung	7.36099	17.6415	0.100998	29.3706	19.9816	14.7506	2.10103	1.92106
K-562-SM-4QAR5	Bone Marrow	14.2412	0.371002	0.130996	4.90108	11.241	0.190994	0.0410009	0.410997
GTEX-14A5H-0006-SM-5O9AI	Blood	2.51107	4.45091	0.921017	11.2613	2.211	4.4309	0.061002	2.72093
GTEX-13FLV-0326-SM-5N9DJ	Liver	3.10093	5.30113	0.291002	6.17098	6.52103	1.141	1.27103	0.861009
GTEX-ZVZQ-0006-SM-51MR8	Blood	1.15101	1.241	0.761017	6.67099	2.29104	5.11098	0.061002	2.30106
GTEX-OIZH-0226-SM-2YUMH	Adipose Tissue	9.87103	11.4312	0.061002	24.2414	20.2409	19.5704	1.37097	0.0309997
GTEX-146FR-1326-SM-5SIAJ	Skin	11.5306	10.1711	0.061002	5.74099	21.1107	9.17113	0.891002	0.621015
GTEX-Y5V6-0326-SM-4VBRW	Blood Vessel	13.7009	18.6914	0.121002	10.6812	13.9907	4.52087	1.38099	0.0710018
GTEX-OHPK-1826-SM-2YUMR	Blood Vessel	7.53078	10.3812	0.0509985	7.0411	19.2515	2.23101	0.621015	0.000999989
GTEX-YEC3-1426-101806-SM-5PNXX	<not provided>	8.42105	6.49082	0.061002	6.68117	14.941	4.94099	0.960994	0.390989
GTEX-QMR6-0011-R10A-SM-32PKO	Brain	2.78099	11.831	0.000999989	2.49096	10.581	1.67099	0.621015	0.251007
GTEX-W5WG-1626-SM-4LMKG	Esophagus	9.58116	7.65074	0.141003	16.6206	13.8412	16.6806	5.51095	0.260996
GTEX-11EM3-1126-SM-5A5KM	Adipose Tissue	6.31114	21.181	0.181005	38.0414	22.9815	13.3106	0.910986	2.02104
GTEX-ZVP2-2226-SM-5GU6Q	Blood Vessel	9.88129	14.7905	0.000999989	11.5011	19.2715	4.00111	0.910986	0.000999989
GTEX-13O3Q-0626-SM-5IJG1	Thyroid	10.2511	14.4811	0.460988	23.2603	15.8708	39.3121	1.85099	0.830988
GTEX-13FTY-0011-R1a-SM-5LZXE	Brain	0.970971	0.66099	0.0209995	1.33099	1.131	0.0810019	0.271007	0.0109996
GTEX-OHPM-0226-SM-3LK61	Adipose Tissue	10.8513	14.9606	0.0810019	13.7209	19.6315	17.971	2.49096	0.130996
GTEX-11WQK-0326-SM-5EQL1	Blood Vessel	12.9708	18.8514	0.061002	26.1511	8.06123	0.671007	0.210998	0.561011
GTEX-X4EO-0926-SM-3P5Z2	Lung	6.94079	87.4205	2.89106	63.2327	20.4114	35.7507	1.70102	2.85106
GTEX-ZF2S-1526-SM-5S2OO	Adipose Tissue	8.72104	4.87094	0.34099	10.9011	13.8412	7.94089	2.28105	0.561011
GTEX-U8XE-2526-SM-4E3IT	Prostate	12.8714	22.4415	1.06098	37.3516	16.3215	15.3706	1.60103	0.0909993
GTEX-ZZ64-0826-SM-5E449	Colon	11.4407	7.74089	0.000999989	12.0311	22.0407	5.44111	2.20106	0.571015
GTEX-13W3W-1026-SM-5IFG4	Pancreas	3.03101	4.07105	0.0410009	5.18089	6.7309	6.9509	1.511	0.0710018
GTEX-11ZU8-1126-SM-5EQ5K	Colon	5.44111	8.14097	0.000999989	9.00109	12.1308	3.41101	1.07103	3.34105
GTEX-139TU-0011-R5b-SM-5L3E1	Brain	1.30098	3.03101	0.121002	2.62097	1.84101	1.06098	0.280992	0.0410009
GTEX-ZVTK-0326-SM-51MRR	Breast	9.06119	15.1811	0.150998	11.5306	12.5708	20.6004	2.71095	0.811015
GTEX-13NZB-0226-SM-5KM1T	Heart	3.41101	2.841	0.061002	2.83098	2.9709	2.08103	0.251007	1.92106
GTEX-144GN-0626-SM-5O9B2	Esophagus	13.4609	13.7914	0.38101	17.7814	15.1611	13.5114	5.0711	1.08103
GTEX-SE5C-0426-SM-4BRUI	Blood Vessel	25.7108	24.7302	0.000999989	16.0211	19.5907	4.21111	0.830988	0.761017
GTEX-QDVN-0726-SM-4B64L	Lung	12.771	28.7502	0.201005	46.8605	17.1116	30.3811	2.28105	0.960994
GTEX-U3ZN-0826-SM-4DXSZ	Adrenal Gland	18.101	18.3804	0.061002	6.1309	9.86077	2.161	5.11098	0.201005
GTEX-UJHI-1626-SM-3DB9A	Adipose Tissue	14.5314	15.9314	0.0209995	18.3715	19.9111	14.421	2.22099	0.0710018
GTEX-13111-2326-SM-5LZUQ	Salivary Gland	14.451	14.6112	0.201005	11.541	19.8615	21.6711	2.99094	0.471
GTEX-Y114-2626-SM-4TT8Y	Nerve	9.62109	16.1706	0.0209995	11.3208	17.6709	6.03101	1.69103	0.100998
GTEX-11EI6-3126-SM-5H111	Pituitary	6.74117	14.8008	0.190994	17.2712	14.8614	5.35097	1.12101	0.240999
GTEX-13NZB-2626-SM-5J2M7	Muscle	3.84105	1.77104	0.000999989	0.960994	4.41098	0.580996	0.061002	0.460988
GTEX-12WSD-0326-SM-59HKP	Nerve	12.7206	16.4304	0.171004	17.1412	21.061	6.54095	1.941	0.110998
GTEX-ZLV1-1826-SM-5FQU5	Adipose Tissue	12.4606	10.481	0.061002	31.5901	19.8711	16.1213	3.74094	0.121002
GTEX-111YS-0006-SM-5NQBE	Blood	18.871	9.27084	0.280992	37.0911	8.03111	26.7803	0.000999989	0.790973
GTEX-S3XE-0926-SM-4AD4S	Esophagus	13.0114	12.4606	0.130996	16.5907	12.4313	10.0708	1.42099	0.511002
GTEX-XUZC-1026-SM-4BOPY	Ovary	8.201	51.2294	0.0309997	4.3211	10.3913	1.91096	0.671007	0.000999989
[truncated: 5,863 more rows]
