# Supplementary material for: Multi-omics analysis reveals the panoramic picture of necroptosis-related regulators in pan-cancer
Source: Aging (Albany NY). 2022 Jun 21;14(12):5034–58. doi: 10.18632/aging.204124 (PMC9271292; doi:10.18632/aging.204124)
Supplement: Supplementary Material 2 [file aging-14-204124-s002.xlsx]

## Sheet: SheetName
cancertype	symbol	sur_type	log_rank_p	hr	higher_risk_of_death	Mutant	WT	entrez
BRCA	RIPK3	OS	0.000623356	14.242	Mutant	4	1021	11035
BRCA	FAS	OS	0.0015767	7.08277	Mutant	3	1022	355
SKCM	MLKL	OS	0.0110404	2.43354	Mutant	10	449	197259
UCEC	TLR3	OS	0.040631	0.256825	WT	32	498	7098
COAD	FASLG	OS	0.063412	3.48698	Mutant	3	401	356
BLCA	RIPK3	OS	0.0666998	1.0856e-07	WT	6	403	11035
STAD	FASLG	OS	0.0730335	1.08574e-07	WT	5	427	356
COAD	RIPK1	OS	0.0732122	2.23794	Mutant	10	394	8737
UCEC	RIPK1	OS	0.0940744	0.32076	WT	29	501	8737
LUAD	TLR3	OS	0.0971317	3.07331	Mutant	4	504	7098
LGG	MLKL	OS	0.127647	1.00711e-07	WT	3	521	197259
SKCM	FASLG	OS	0.134939	0.587007	WT	21	438	356
BLCA	TLR3	OS	0.148207	0.440421	WT	11	398	7098
STAD	FAS	OS	0.151202	2.03676	Mutant	5	427	355
LUAD	RIPK3	OS	0.17839	2.99146e-07	WT	3	505	11035
SKCM	FAS	OS	0.185619	0.471338	WT	11	448	355
BRCA	RIPK1	OS	0.200082	3.36378	Mutant	6	1019	8737
CESC	RIPK1	OS	0.209703	3.33859	Mutant	3	288	8737
COAD	RIPK3	OS	0.219108	2.35337	Mutant	3	401	11035
LUAD	MLKL	OS	0.224197	3.01237e-07	WT	4	504	197259
LUSC	MLKL	OS	0.236106	0.323831	WT	5	474	197259
UCEC	FASLG	OS	0.255966	0.452509	WT	17	513	356
STAD	FADD	OS	0.266525	3.01959e-07	WT	3	429	8772
LIHC	TLR3	OS	0.306553	2.99419e-07	WT	4	360	7098
STAD	TLR3	OS	0.321504	1.7706	Mutant	7	425	7098
COAD	MLKL	OS	0.341647	2.52031	Mutant	3	401	197259
DLBC	FAS	OS	0.354224	2.70636	Mutant	3	34	355
UCEC	FAS	OS	0.369365	0.593264	WT	25	505	355
GBM	RIPK3	OS	0.389786	1.63986	Mutant	3	394	11035
LUSC	FAS	OS	0.401852	0.441132	WT	3	476	355
LUAD	FAS	OS	0.409028	2.24422	Mutant	3	505	355
UCEC	MLKL	OS	0.431401	0.573468	WT	19	511	197259
HNSC	FAS	OS	0.434693	0.465823	WT	5	503	355
COAD	FAS	OS	0.436361	0.465528	WT	7	397	355
CESC	FADD	OS	0.43773	2.99769e-07	WT	3	288	8772
READ	TLR3	OS	0.456272	1.07082e-07	WT	4	144	7098
BRCA	MLKL	OS	0.475843	8.24428e-07	WT	3	1022	197259
HNSC	FADD	OS	0.480323	0.499644	WT	3	505	8772
BLCA	TNF	OS	0.50997	0.522253	WT	3	406	7124
LUSC	TLR3	OS	0.517644	1.30681	Mutant	12	467	7098
SKCM	RIPK3	OS	0.533888	1.25088	Mutant	14	445	11035
LUAD	FASLG	OS	0.586723	0.680853	WT	8	500	356
STAD	RIPK3	OS	0.590111	0.585366	WT	3	429	11035
COAD	TLR3	OS	0.595167	0.685656	WT	11	393	7098
UCEC	RIPK3	OS	0.604123	0.6912	WT	17	513	11035
STAD	RIPK1	OS	0.623812	0.614654	WT	3	429	8737
UCEC	TNF	OS	0.630892	0.618714	WT	7	523	7124
LUSC	TNF	OS	0.654801	1.29696	Mutant	5	474	7124
CESC	FAS	OS	0.690526	1.32939	Mutant	6	285	355
HNSC	FASLG	OS	0.698453	0.679542	WT	3	505	356
SARC	TNF	OS	0.705268	0.686291	WT	3	236	7124
STAD	MLKL	OS	0.725419	1.28379	Mutant	5	427	197259
CESC	MLKL	OS	0.726756	1.41986	Mutant	3	288	197259
LUSC	RIPK3	OS	0.734864	0.713076	WT	3	476	11035
HNSC	MLKL	OS	0.735482	1.40073	Mutant	3	505	197259
BLCA	FADD	OS	0.76138	0.806374	WT	6	403	8772
LIHC	RIPK3	OS	0.822768	1.2542	Mutant	3	361	11035
SKCM	RIPK1	OS	0.825312	1.096	Mutant	14	445	8737
BLCA	MLKL	OS	0.836928	0.813443	WT	3	406	197259
LUSC	FASLG	OS	0.843971	0.89181	WT	5	474	356
BLCA	RIPK1	OS	0.85207	1.11418	Mutant	7	402	8737
LUSC	FADD	OS	0.926998	1.09608	Mutant	3	476	8772
CESC	TLR3	OS	0.932265	0.917645	WT	5	286	7098
LUAD	RIPK1	OS	0.933061	1.04997	Mutant	9	499	8737
SKCM	TLR3	OS	0.939479	1.02366	Mutant	24	435	7098
UCEC	FADD	OS	0.967429	0.971099	WT	9	521	8772
BRCA	TLR3	OS	0.990821	1.01142	Mutant	10	1015	7098
