# Supplementary material for: Multi-omics analysis reveals the panoramic picture of necroptosis-related regulators in pan-cancer
Source: Aging (Albany NY). 2022 Jun 21;14(12):5034–58. doi: 10.18632/aging.204124 (PMC9271292; doi:10.18632/aging.204124)
Supplement: Supplementary Material 3 [file aging-14-204124-s003.xlsx]

## Sheet: SheetName
cancertype	symbol	a_total	d_total	a_hete	d_hete	a_homo	d_homo	entrez
ACC	FADD	4.44444	27.7778	3.33333	27.7778	1.11111	0	8772
ACC	FAS	28.8889	11.1111	28.8889	11.1111	0	0	355
ACC	FASLG	13.3333	15.5556	13.3333	15.5556	0	0	356
ACC	MLKL	53.3333	8.88889	53.3333	8.88889	0	0	197259
ACC	RIPK1	20	18.8889	20	17.7778	0	1.11111	8737
ACC	RIPK3	27.7778	21.1111	25.5556	21.1111	2.22222	0	11035
ACC	TLR3	31.1111	21.1111	31.1111	17.7778	0	3.33333	7098
ACC	TNF	17.7778	20	17.7778	18.8889	0	1.11111	7124
BLCA	FADD	29.902	18.3824	20.8333	18.3824	9.06863	0	8772
BLCA	FAS	8.33333	40.1961	7.59804	37.7451	0.735294	2.45098	355
BLCA	FASLG	45.5882	6.12745	37.5	6.12745	8.08824	0	356
BLCA	MLKL	23.5294	26.2255	21.5686	26.2255	1.96078	0	197259
BLCA	RIPK1	28.9216	22.0588	26.9608	20.5882	1.96078	1.47059	8737
BLCA	RIPK3	18.8725	28.9216	17.6471	27.6961	1.22549	1.22549	11035
BLCA	TLR3	8.82353	42.8922	8.57843	39.951	0.245098	2.94118	7098
BLCA	TNF	26.9608	19.1176	25	18.6275	1.96078	0.490196	7124
BRCA	FADD	35.5556	11.6667	20.463	11.6667	15.0926	0	8772
BRCA	FAS	7.87037	29.537	7.77778	28.3333	0.0925926	1.2037	355
BRCA	FASLG	73.3333	2.31481	63.3333	2.31481	10	0	356
BRCA	MLKL	10	61.9444	9.62963	60.1852	0.37037	1.75926	197259
BRCA	RIPK1	22.8704	18.3333	21.8519	17.3148	1.01852	1.01852	8737
BRCA	RIPK3	17.5926	22.963	16.7593	22.963	0.833333	0	11035
BRCA	TLR3	9.72222	32.2222	9.16667	30.463	0.555556	1.75926	7098
BRCA	TNF	25.0926	14.2593	23.6111	14.2593	1.48148	0	7124
CESC	FADD	13.5593	26.1017	10.5085	25.4237	3.05085	0.677966	8772
CESC	FAS	5.76271	29.8305	5.42373	27.7966	0.338983	2.0339	355
CESC	FASLG	53.2203	2.71186	51.1864	2.71186	2.0339	0	356
CESC	MLKL	13.8983	16.2712	13.2203	15.9322	0.677966	0.338983	197259
CESC	RIPK1	25.0847	14.2373	24.0678	13.5593	1.01695	0.677966	8737
CESC	RIPK3	15.5932	12.2034	14.9153	11.8644	0.677966	0.338983	11035
CESC	TLR3	7.11864	37.2881	6.77966	33.8983	0.338983	3.38983	7098
CESC	TNF	26.4407	11.8644	24.0678	11.8644	2.37288	0	7124
CHOL	FADD	13.8889	19.4444	11.1111	19.4444	2.77778	0	8772
CHOL	FAS	11.1111	19.4444	8.33333	19.4444	2.77778	0	355
CHOL	FASLG	63.8889	0	50	0	13.8889	0	356
CHOL	MLKL	16.6667	19.4444	13.8889	19.4444	2.77778	0	197259
CHOL	RIPK1	27.7778	11.1111	25	11.1111	2.77778	0	8737
CHOL	RIPK3	2.77778	38.8889	2.77778	38.8889	0	0	11035
CHOL	TLR3	5.55556	61.1111	5.55556	61.1111	0	0	7098
CHOL	TNF	25	11.1111	22.2222	11.1111	2.77778	0	7124
COAD	FADD	11.3082	14.1907	11.3082	13.969	0	0.22173	8772
COAD	FAS	3.7694	22.3947	3.54767	21.5078	0.22173	0.886918	355
COAD	FASLG	21.5078	9.53437	21.0643	9.53437	0.443459	0	356
COAD	MLKL	22.6164	6.87361	22.6164	6.65188	0	0.22173	197259
COAD	RIPK1	19.2905	10.1996	19.2905	9.97783	0	0.22173	8737
COAD	RIPK3	8.20399	31.4856	8.20399	31.4856	0	0	11035
COAD	TLR3	3.32594	34.3681	3.10421	31.929	0.22173	2.43902	7098
COAD	TNF	20.8426	9.7561	20.6208	9.31264	0.22173	0.443459	7124
DLBC	FADD	20.8333	4.16667	20.8333	4.16667	0	0	8772
DLBC	FAS	10.4167	14.5833	10.4167	8.33333	0	6.25	355
DLBC	FASLG	33.3333	2.08333	29.1667	2.08333	4.16667	0	356
DLBC	MLKL	14.5833	8.33333	14.5833	8.33333	0	0	197259
DLBC	RIPK1	18.75	6.25	16.6667	4.16667	2.08333	2.08333	8737
DLBC	RIPK3	4.16667	4.16667	4.16667	4.16667	0	0	11035
DLBC	TLR3	2.08333	16.6667	2.08333	12.5	0	4.16667	7098
DLBC	TNF	14.5833	14.5833	12.5	8.33333	2.08333	6.25	7124
ESCA	FADD	56.5217	9.23913	20.1087	9.23913	36.413	0	8772
ESCA	FAS	13.587	35.3261	13.0435	34.2391	0.543478	1.08696	355
ESCA	FASLG	48.3696	6.52174	44.0217	6.52174	4.34783	0	356
ESCA	MLKL	25.5435	29.3478	25.5435	29.3478	0	0	197259
ESCA	RIPK1	22.2826	34.7826	22.2826	30.4348	0	4.34783	8737
ESCA	RIPK3	29.3478	25.5435	28.2609	25.5435	1.08696	0	11035
ESCA	TLR3	11.413	51.6304	10.3261	47.8261	1.08696	3.80435	7098
ESCA	TNF	27.7174	21.1957	22.8261	21.1957	4.8913	0	7124
GBM	FADD	2.94627	16.9844	2.59965	16.9844	0.34662	0	8772
GBM	FAS	0.17331	88.9081	0	86.6551	0.17331	2.25303	355
GBM	FASLG	16.6378	2.59965	16.6378	2.59965	0	0	356
GBM	MLKL	6.58579	16.4645	6.58579	16.4645	0	0	197259
GBM	RIPK1	6.06586	14.9047	5.54593	14.7314	0.519931	0.17331	8737
GBM	RIPK3	4.50607	29.636	4.33276	29.4627	0.17331	0.17331	11035
GBM	TLR3	5.19931	14.9047	5.19931	14.3847	0	0.519931	7098
GBM	TNF	4.85269	13.8648	4.85269	13.8648	0	0	7124
HNSC	FADD	43.4866	10.5364	18.1992	10.3448	25.2874	0.191571	8772
HNSC	FAS	6.89655	25.8621	6.70498	24.7126	0.191571	1.14943	355
HNSC	FASLG	25.8621	7.27969	24.7126	7.27969	1.14943	0	356
HNSC	MLKL	21.6475	16.6667	21.6475	16.6667	0	0	197259
HNSC	RIPK1	18.1992	17.8161	17.8161	17.433	0.383142	0.383142	8737
HNSC	RIPK3	28.5441	14.751	27.9693	14.3678	0.574713	0.383142	11035
HNSC	TLR3	7.66284	38.6973	7.27969	35.4406	0.383142	3.25671	7098
HNSC	TNF	18.1992	16.092	17.2414	15.9004	0.957854	0.191571	7124
KICH	FADD	27.2727	10.6061	27.2727	10.6061	0	0	8772
KICH	FAS	3.0303	74.2424	3.0303	74.2424	0	0	355
KICH	FASLG	1.51515	75.7576	1.51515	75.7576	0	0	356
KICH	MLKL	31.8182	7.57576	31.8182	7.57576	0	0	197259
KICH	RIPK1	3.0303	77.2727	3.0303	77.2727	0	0	8737
KICH	RIPK3	31.8182	3.0303	31.8182	3.0303	0	0	11035
KICH	TLR3	34.8485	4.54545	34.8485	4.54545	0	0	7098
KICH	TNF	3.0303	77.2727	3.0303	77.2727	0	0	7124
KIRC	FADD	6.43939	3.59848	6.43939	3.59848	0	0	8772
KIRC	FAS	2.08333	18.1818	2.08333	18.1818	0	0	355
KIRC	FASLG	11.9318	6.25	11.3636	6.25	0.568182	0	356
KIRC	MLKL	18.5606	3.78788	18.5606	3.78788	0	0	197259
KIRC	RIPK1	2.27273	18.1818	2.27273	18.1818	0	0	8737
KIRC	RIPK3	3.2197	39.2045	3.2197	39.2045	0	0	11035
KIRC	TLR3	2.27273	14.7727	2.27273	14.5833	0	0.189394	7098
KIRC	TNF	1.89394	18.9394	1.89394	18.9394	0	0	7124
KIRP	FADD	3.47222	5.55556	3.125	5.55556	0.347222	0	8772
KIRP	FAS	2.77778	6.25	2.77778	6.25	0	0	355
KIRP	FASLG	6.25	6.94444	6.25	6.59722	0	0.347222	356
KIRP	MLKL	51.7361	2.77778	51.3889	2.77778	0.347222	0	197259
KIRP	RIPK1	1.73611	9.375	1.73611	9.02778	0	0.347222	8737
KIRP	RIPK3	1.04167	17.3611	0.694444	17.0139	0.347222	0.347222	11035
KIRP	TLR3	2.77778	10.0694	2.77778	9.72222	0	0.347222	7098
KIRP	TNF	1.38889	9.72222	1.38889	9.02778	0	0.694444	7124
LAML	FADD	3.66492	0	3.66492	0	0	0	8772
LAML	FAS	1.57068	0.52356	1.57068	0.52356	0	0	355
LAML	FASLG	1.04712	0	1.04712	0	0	0	356
LAML	MLKL	0	4.18848	0	2.6178	0	1.57068	197259
LAML	RIPK1	1.04712	0	0.52356	0	0.52356	0	8737
LAML	RIPK3	1.04712	0.52356	1.04712	0.52356	0	0	11035
LAML	TLR3	2.09424	1.04712	2.09424	1.04712	0	0	7098
LAML	TNF	0.52356	0	0.52356	0	0	0	7124
LGG	FADD	10.7212	4.09357	10.5263	4.09357	0.194932	0	8772
LGG	FAS	0.389864	22.4172	0.389864	22.0273	0	0.389864	355
LGG	FASLG	6.23782	2.33918	6.04289	2.33918	0.194932	0	356
LGG	MLKL	3.7037	5.06823	3.7037	5.06823	0	0	197259
LGG	RIPK1	2.53411	8.77193	1.75439	7.79727	0.779727	0.974659	8737
LGG	RIPK3	2.72904	13.6452	1.36452	13.4503	1.36452	0.194932	11035
LGG	TLR3	0.779727	26.7057	0.779727	23.0019	0	3.7037	7098
LGG	TNF	2.14425	5.65302	1.36452	5.45809	0.779727	0.194932	7124
LIHC	FADD	10.8108	16.2162	8.10811	15.9459	2.7027	0.27027	8772
LIHC	FAS	10	25.6757	9.72973	25.1351	0.27027	0.54054	355
LIHC	FASLG	74.3243	0.54054	64.8649	0.54054	9.45946	0	356
LIHC	MLKL	4.86486	42.973	4.86486	42.4324	0	0.54054	197259
LIHC	RIPK1	42.4324	3.24324	37.027	2.97297	5.40541	0.27027	8737
LIHC	RIPK3	10.8108	22.4324	9.72973	22.4324	1.08108	0	11035
LIHC	TLR3	4.59459	45.6757	4.32432	41.8919	0.27027	3.78378	7098
LIHC	TNF	40.2703	2.7027	35.9459	2.7027	4.32432	0	7124
LUAD	FADD	32.5581	11.6279	29.6512	11.2403	2.90698	0.387597	8772
LUAD	FAS	14.5349	28.6822	14.5349	28.1008	0	0.581395	355
LUAD	FASLG	70.9302	2.13178	63.9535	2.13178	6.97674	0	356
LUAD	MLKL	18.7984	30.814	17.8295	30.0388	0.968992	0.775194	197259
LUAD	RIPK1	37.7907	12.0155	36.6279	11.8217	1.16279	0.193798	8737
LUAD	RIPK3	32.5581	19.5736	30.0388	19.3798	2.51938	0.193798	11035
LUAD	TLR3	9.30233	36.2403	9.30233	33.7209	0	2.51938	7098
LUAD	TNF	37.2093	11.8217	35.0775	11.6279	2.13178	0.193798	7124
LUSC	FADD	36.9261	16.1677	22.5549	16.1677	14.3713	0	8772
LUSC	FAS	7.78443	52.2954	7.78443	49.7006	0	2.59481	355
LUSC	FASLG	51.2974	4.99002	45.7086	4.99002	5.58882	0	356
LUSC	MLKL	17.9641	38.3234	17.7645	38.1238	0.199601	0.199601	197259
LUSC	RIPK1	26.7465	26.3473	25.3493	25.3493	1.39721	0.998004	8737
LUSC	RIPK3	27.9441	35.7285	27.1457	34.9301	0.798403	0.798403	11035
LUSC	TLR3	5.58882	66.2675	4.99002	61.2774	0.598802	4.99002	7098
LUSC	TNF	24.1517	24.5509	23.5529	24.3513	0.598802	0.199601	7124
MESO	FADD	19.5402	2.29885	19.5402	2.29885	0	0	8772
MESO	FAS	3.44828	31.0345	3.44828	29.8851	0	1.14943	355
MESO	FASLG	25.2874	4.5977	22.9885	4.5977	2.29885	0	356
MESO	MLKL	13.7931	22.9885	13.7931	21.8391	0	1.14943	197259
MESO	RIPK1	10.3448	9.1954	8.04598	9.1954	2.29885	0	8737
MESO	RIPK3	2.29885	42.5287	2.29885	42.5287	0	0	11035
MESO	TLR3	1.14943	44.8276	1.14943	44.8276	0	0	7098
MESO	TNF	9.1954	11.4943	9.1954	11.4943	0	0	7124
OV	FADD	37.8238	16.0622	30.5699	15.8895	7.25389	0.172712	8772
OV	FAS	18.9983	39.5509	18.6528	37.9965	0.345423	1.5544	355
OV	FASLG	55.095	5.00864	50.0864	5.00864	5.00864	0	356
OV	MLKL	5.87219	76.8566	5.35406	74.6114	0.518135	2.24525	197259
OV	RIPK1	48.0138	20.8981	38.1693	20.5527	9.84456	0.345423	8737
OV	RIPK3	19.171	35.2332	17.4439	34.3696	1.72712	0.863558	11035
OV	TLR3	8.11744	70.9845	6.39033	67.5302	1.72712	3.45423	7098
OV	TNF	46.6321	17.4439	40.2418	17.4439	6.39033	0	7124
PAAD	FADD	10.3261	7.6087	9.23913	7.6087	1.08696	0	8772
PAAD	FAS	7.6087	18.4783	7.06522	18.4783	0.543478	0	355
PAAD	FASLG	31.5217	3.80435	29.3478	3.80435	2.17391	0	356
PAAD	MLKL	13.587	8.15217	13.587	8.15217	0	0	197259
PAAD	RIPK1	3.80435	40.2174	3.80435	40.2174	0	0	8737
PAAD	RIPK3	16.3043	9.23913	16.3043	9.23913	0	0	11035
PAAD	TLR3	4.34783	18.4783	4.34783	17.9348	0	0.543478	7098
PAAD	TNF	7.6087	32.0652	4.8913	32.0652	2.71739	0	7124
PCPG	FADD	3.08642	22.8395	2.46914	22.8395	0.617284	0	8772
PCPG	FAS	6.17284	1.23457	6.17284	1.23457	0	0	355
PCPG	FASLG	15.4321	8.64198	12.3457	8.64198	3.08642	0	356
PCPG	MLKL	3.7037	3.08642	3.7037	3.08642	0	0	197259
PCPG	RIPK1	9.25926	1.85185	8.02469	1.85185	1.23457	0	8737
PCPG	RIPK3	1.85185	12.3457	1.85185	12.3457	0	0	11035
PCPG	TLR3	3.7037	9.25926	2.46914	9.25926	1.23457	0	7098
PCPG	TNF	8.64198	1.23457	8.02469	1.23457	0.617284	0	7124
PRAD	FADD	9.34959	0.813008	7.72358	0.609756	1.62602	0.203252	8772
PRAD	FAS	1.62602	25.4065	1.21951	17.6829	0.406504	7.72358	355
PRAD	FASLG	4.6748	3.04878	4.6748	2.23577	0	0.813008	356
PRAD	MLKL	1.42276	38.0081	1.21951	30.2846	0.203252	7.72358	197259
PRAD	RIPK1	3.45528	7.52033	3.45528	6.30081	0	1.21951	8737
PRAD	RIPK3	2.23577	6.30081	2.23577	6.09756	0	0.203252	11035
PRAD	TLR3	3.04878	6.50407	2.84553	6.30081	0.203252	0.203252	7098
PRAD	TNF	3.86179	4.6748	3.65854	4.26829	0.203252	0.406504	7124
READ	FADD	16.3636	19.3939	15.7576	19.3939	0.606061	0	8772
READ	FAS	1.81818	30.9091	1.81818	30.9091	0	0	355
READ	FASLG	30.303	8.48485	29.0909	8.48485	1.21212	0	356
READ	MLKL	24.2424	12.1212	24.2424	12.1212	0	0	197259
READ	RIPK1	23.6364	13.3333	23.0303	13.3333	0.606061	0	8737
READ	RIPK3	5.45455	40	5.45455	40	0	0	11035
READ	TLR3	4.84848	43.0303	4.84848	40.6061	0	2.42424	7098
READ	TNF	27.8788	10.303	27.2727	10.303	0.606061	0	7124
SARC	FADD	13.2296	28.0156	12.0623	27.6265	1.16732	0.389105	8772
SARC	FAS	3.89105	52.9183	3.89105	50.1946	0	2.72374	355
SARC	FASLG	35.4086	10.1167	28.4047	9.72763	7.00389	0.389105	356
SARC	MLKL	7.7821	52.5292	7.7821	52.1401	0	0.389105	197259
SARC	RIPK1	20.2335	31.5175	19.8444	31.1284	0.389105	0.389105	8737
SARC	RIPK3	29.9611	18.677	27.6265	18.677	2.33463	0	11035
SARC	TLR3	12.4514	37.7432	11.6732	33.8521	0.77821	3.89105	7098
SARC	TNF	21.7899	27.2374	21.0117	27.2374	0.77821	0	7124
SKCM	FADD	18.2561	29.4278	12.8065	29.1553	5.44959	0.27248	8772
SKCM	FAS	1.3624	62.3978	1.3624	61.8529	0	0.544959	355
SKCM	FASLG	53.951	4.35967	50.6812	4.35967	3.26975	0	356
SKCM	MLKL	12.2616	31.3351	11.9891	31.0627	0.27248	0.27248	197259
SKCM	RIPK1	57.4932	5.44959	51.4986	5.44959	5.99455	0	8737
SKCM	RIPK3	12.2616	30.2452	11.7166	29.9728	0.544959	0.27248	11035
SKCM	TLR3	13.8965	26.703	12.8065	25.3406	1.08992	1.3624	7098
SKCM	TNF	51.4986	8.44687	46.8665	8.44687	4.63215	0	7124
STAD	FADD	25.3968	10.2041	19.2744	9.75057	6.12245	0.453515	8772
STAD	FAS	11.5646	25.6236	11.3379	23.1293	0.226757	2.49433	355
STAD	FASLG	34.0136	2.72109	32.1995	2.72109	1.81406	0	356
STAD	MLKL	12.9252	26.7574	12.2449	26.3039	0.680272	0.453515	197259
STAD	RIPK1	20.1814	18.8209	19.7279	18.3673	0.453515	0.453515	8737
STAD	RIPK3	11.3379	24.9433	10.8844	24.263	0.453515	0.680272	11035
STAD	TLR3	3.62812	46.2585	3.1746	42.4036	0.453515	3.85488	7098
STAD	TNF	23.1293	12.4717	20.8617	11.3379	2.26757	1.13379	7124
TGCT	FADD	2	78	2	76.6667	0	1.33333	8772
TGCT	FAS	6.66667	45.3333	6.66667	45.3333	0	0	355
TGCT	FASLG	46.6667	0.666667	46.6667	0.666667	0	0	356
TGCT	MLKL	8.66667	41.3333	8.66667	41.3333	0	0	197259
TGCT	RIPK1	20	12.6667	20	12.6667	0	0	8737
TGCT	RIPK3	33.3333	13.3333	33.3333	13.3333	0	0	11035
TGCT	TLR3	2	70	2	70	0	0	7098
TGCT	TNF	18.6667	10	18.6667	10	0	0	7124
THCA	FADD	1.002	1.60321	1.002	1.60321	0	0	8772
THCA	FAS	0.400802	2.20441	0.400802	1.60321	0	0.601202	355
THCA	FASLG	5.41082	0.601202	5.21042	0.601202	0.200401	0	356
THCA	MLKL	2.60521	1.002	2.60521	0.601202	0	0.400802	197259
THCA	RIPK1	0.400802	0.601202	0.400802	0.601202	0	0	8737
THCA	RIPK3	2.20441	0.200401	2.20441	0.200401	0	0	11035
THCA	TLR3	1.002	0.601202	1.002	0.601202	0	0	7098
THCA	TNF	0.400802	0.801603	0.400802	0.801603	0	0	7124
THYM	FADD	0.813008	5.69106	0.813008	5.69106	0	0	8772
THYM	FAS	1.62602	3.25203	1.62602	3.25203	0	0	355
THYM	FASLG	19.5122	0	18.6992	0	0.813008	0	356
THYM	MLKL	1.62602	10.5691	1.62602	10.5691	0	0	197259
THYM	RIPK1	0	21.1382	0	17.8862	0	3.25203	8737
THYM	RIPK3	10.5691	1.62602	10.5691	1.62602	0	0	11035
THYM	TLR3	1.62602	4.06504	1.62602	3.25203	0	0.813008	7098
THYM	TNF	0	16.2602	0	16.2602	0	0	7124
UCEC	FADD	11.3173	10.2041	9.09091	9.83302	2.22635	0.371057	8772
UCEC	FAS	20.5937	14.1002	19.666	12.8015	0.927644	1.2987	355
UCEC	FASLG	43.7848	1.2987	40.2597	1.2987	3.52505	0	356
UCEC	MLKL	3.33952	29.128	2.5974	27.8293	0.742115	1.2987	197259
UCEC	RIPK1	18.1818	3.8961	16.141	3.8961	2.04082	0	8737
UCEC	RIPK3	8.90538	11.5028	8.34879	11.5028	0.556586	0	11035
UCEC	TLR3	2.41187	22.449	2.22635	20.9647	0.185529	1.48423	7098
UCEC	TNF	18.9239	2.5974	17.0686	2.5974	1.85529	0	7124
UCS	FADD	26.7857	39.2857	26.7857	39.2857	0	0	8772
UCS	FAS	35.7143	35.7143	33.9286	35.7143	1.78571	0	355
UCS	FASLG	73.2143	5.35714	69.6429	5.35714	3.57143	0	356
UCS	MLKL	8.92857	69.6429	8.92857	69.6429	0	0	197259
UCS	RIPK1	62.5	8.92857	55.3571	8.92857	7.14286	0	8737
UCS	RIPK3	19.6429	50	19.6429	50	0	0	11035
UCS	TLR3	12.5	60.7143	12.5	58.9286	0	1.78571	7098
UCS	TNF	60.7143	8.92857	58.9286	8.92857	1.78571	0	7124
UVM	FADD	12.5	1.25	12.5	1.25	0	0	8772
UVM	FAS	0	1.25	0	1.25	0	0	355
UVM	FASLG	10	0	10	0	0	0	356
UVM	MLKL	1.25	21.25	1.25	21.25	0	0	197259
UVM	RIPK1	56.25	0	46.25	0	10	0	8737
UVM	RIPK3	3.75	1.25	3.75	1.25	0	0	11035
UVM	TLR3	5	5	5	5	0	0	7098
UVM	TNF	53.75	0	46.25	0	7.5	0	7124
