# Supplementary material for: Multi-omics analysis reveals the panoramic picture of necroptosis-related regulators in pan-cancer
Source: Aging (Albany NY). 2022 Jun 21;14(12):5034–58. doi: 10.18632/aging.204124 (PMC9271292; doi:10.18632/aging.204124)
Supplement: Supplementary Material 4 [file aging-14-204124-s004.xlsx]

## Sheet: SheetName
cancertype	symbol	cor	fdr	entrez
ACC	FADD	0.120227	0.404735	8772
ACC	FAS	0.102589	0.48431	355
ACC	FASLG	-0.176642	0.198816	356
ACC	MLKL	0.0530412	0.736454	197259
ACC	RIPK1	0.54917	1.96355e-06	8737
ACC	RIPK3	-0.43129	0.000370343	11035
ACC	TLR3	0.463458	0.00010734	7098
ACC	TNF	0.0648999	0.674725	7124
BLCA	FADD	0.555408	6.42775e-33	8772
BLCA	FAS	0.227019	8.56998e-06	355
BLCA	FASLG	-0.0658485	0.239354	356
BLCA	MLKL	0.233739	4.41178e-06	197259
BLCA	RIPK1	0.557427	3.40635e-33	8737
BLCA	RIPK3	0.110436	0.0396891	11035
BLCA	TLR3	0.231209	5.67697e-06	7098
BLCA	TNF	0.139619	0.0081492	7124
BRCA	FADD	0.685682	9.88359e-149	8772
BRCA	FAS	0.04611	0.15569	355
BRCA	FASLG	-0.138781	7.85608e-06	356
BRCA	MLKL	0.402913	1.02793e-42	197259
BRCA	RIPK1	0.485023	7.68888e-64	8737
BRCA	RIPK3	0.204854	2.21425e-11	11035
BRCA	TLR3	0.191089	4.80704e-10	7098
BRCA	TNF	0.140076	6.41759e-06	7124
CESC	FADD	0.527911	2.9039e-21	8772
CESC	FAS	0.314809	1.13205e-07	355
CESC	FASLG	-0.038353	0.583198	356
CESC	MLKL	0.156461	0.0126625	197259
CESC	RIPK1	0.589955	2.29336e-27	8737
CESC	RIPK3	-0.0813162	0.21882	11035
CESC	TLR3	0.396307	8.89478e-12	7098
CESC	TNF	0.202168	0.00100833	7124
CHOL	FADD	0.380229	0.0748979	8772
CHOL	FAS	0.149823	0.560886	355
CHOL	FASLG	-0.316643	0.156219	356
CHOL	MLKL	0.149211	0.562787	197259
CHOL	RIPK1	0.462628	0.0226201	8737
CHOL	RIPK3	0.0997102	0.712298	11035
CHOL	TLR3	0.373737	0.0811493	7098
CHOL	TNF	-0.0186735	0.951456	7124
COAD	FADD	0.535174	3.02986e-21	8772
COAD	FAS	0.226218	0.000278876	355
COAD	FASLG	-0.143653	0.0271903	356
COAD	MLKL	0.174536	0.00619882	197259
COAD	RIPK1	0.292475	1.57933e-06	8737
COAD	RIPK3	0.203135	0.00123121	11035
COAD	TLR3	0.375147	3.04589e-10	7098
COAD	TNF	0.0812291	0.243455	7124
DLBC	FADD	0.366476	0.0983408	8772
DLBC	FAS	0.165902	0.57368	355
DLBC	FASLG	-0.0659084	0.860515	356
DLBC	MLKL	0.0335514	0.934548	197259
DLBC	RIPK1	0.183883	0.518043	8737
DLBC	RIPK3	-0.0110779	0.978977	11035
DLBC	TLR3	-0.160059	0.590366	7098
DLBC	TNF	-0.0189048	0.96561	7124
ESCA	FADD	0.849218	4.2053e-48	8772
ESCA	FAS	0.190928	0.0162881	355
ESCA	FASLG	-0.201773	0.0107552	356
ESCA	MLKL	0.208188	0.00831483	197259
ESCA	RIPK1	0.603233	2.16382e-18	8737
ESCA	RIPK3	-0.0141998	0.879246	11035
ESCA	TLR3	0.419652	1.18023e-08	7098
ESCA	TNF	0.00845611	0.929083	7124
GBM	FADD	0.194923	0.0371062	8772
GBM	FAS	0.310699	0.00040175	355
GBM	FASLG	-0.0454502	0.693981	356
GBM	MLKL	-0.0850398	0.42124	197259
GBM	RIPK1	0.30467	0.000540121	8737
GBM	RIPK3	0.0370586	0.751966	11035
GBM	TLR3	0.0808745	0.447427	7098
GBM	TNF	-0.0489243	0.668269	7124
HNSC	FADD	0.806011	2.92276e-115	8772
HNSC	FAS	0.290706	5.09234e-11	355
HNSC	FASLG	-0.135715	0.00336742	356
HNSC	MLKL	0.117215	0.0121295	197259
HNSC	RIPK1	0.492505	9.2501e-32	8737
HNSC	RIPK3	0.0786849	0.101207	11035
HNSC	TLR3	0.318899	4.14671e-13	7098
HNSC	TNF	0.182261	6.158e-05	7124
KICH	FADD	0.320767	0.0282	8772
KICH	FAS	0.235246	0.128624	355
KICH	FASLG	0.378602	0.00756518	356
KICH	MLKL	0.243979	0.112421	197259
KICH	RIPK1	0.558948	1.8819e-05	8737
KICH	RIPK3	-0.103677	0.560566	11035
KICH	TLR3	0.0840945	0.646656	7098
KICH	TNF	0.430684	0.00187791	7124
KIRC	FADD	0.0765418	0.124643	8772
KIRC	FAS	0.303177	9.56255e-12	355
KIRC	FASLG	0.187947	4.6604e-05	356
KIRC	MLKL	-0.00314666	0.957171	197259
KIRC	RIPK1	0.368324	3.43682e-17	8737
KIRC	RIPK3	-0.0414596	0.434754	11035
KIRC	TLR3	0.0960876	0.0484126	7098
KIRC	TNF	0.0682811	0.175298	7124
KIRP	FADD	0.153827	0.0185094	8772
KIRP	FAS	0.146101	0.0260496	355
KIRP	FASLG	0.0163647	0.836711	356
KIRP	MLKL	0.325751	8.86152e-08	197259
KIRP	RIPK1	0.232471	0.000215444	8737
KIRP	RIPK3	0.105168	0.121104	11035
KIRP	TLR3	0.09598	0.161449	7098
KIRP	TNF	-0.00424735	0.959261	7124
LAML	FADD	0.0408494	0.856395	8772
LAML	FAS	-0.023857	0.923121	355
LAML	FASLG	0.076675	0.68893	356
LAML	MLKL	0.00750392	0.976488	197259
LAML	RIPK1	0.0158365	0.953144	8737
LAML	RIPK3	0.0353486	0.878953	11035
LAML	TLR3	0.0461681	0.833817	7098
LAML	TNF	0.0393974	0.862295	7124
LGG	FADD	0.0125759	0.829716	8772
LGG	FAS	-0.120404	0.0126455	355
LGG	FASLG	0.0129156	0.824967	356
LGG	MLKL	-0.108989	0.0252651	197259
LGG	RIPK1	0.0572654	0.269336	8737
LGG	RIPK3	-0.112514	0.0205533	11035
LGG	TLR3	0.360838	3.12219e-16	7098
LGG	TNF	-0.0732364	0.147526	7124
LIHC	FADD	0.379946	3.17166e-13	8772
LIHC	FAS	0.187898	0.000666604	355
LIHC	FASLG	-0.243632	6.61334e-06	356
LIHC	MLKL	0.354116	1.51746e-11	197259
LIHC	RIPK1	0.575614	4.46563e-32	8737
LIHC	RIPK3	-0.104015	0.0740339	11035
LIHC	TLR3	0.494022	1.05587e-22	7098
LIHC	TNF	-0.0970448	0.0979618	7124
LUAD	FADD	0.354903	3.74618e-16	8772
LUAD	FAS	0.0540622	0.266889	355
LUAD	FASLG	-0.280255	2.57825e-10	356
LUAD	MLKL	0.284806	1.26264e-10	197259
LUAD	RIPK1	0.468961	1.43184e-28	8737
LUAD	RIPK3	0.0601997	0.213114	11035
LUAD	TLR3	0.412306	8.12496e-22	7098
LUAD	TNF	-0.0699277	0.14489	7124
LUSC	FADD	0.701706	3.09039e-73	8772
LUSC	FAS	0.373938	1.57907e-17	355
LUSC	FASLG	-0.00910137	0.861992	356
LUSC	MLKL	0.273195	1.18857e-09	197259
LUSC	RIPK1	0.531656	7.05389e-37	8737
LUSC	RIPK3	0.0904007	0.0563086	11035
LUSC	TLR3	0.446125	3.68566e-25	7098
LUSC	TNF	0.184869	5.5168e-05	7124
MESO	FADD	0.357831	0.00283593	8772
MESO	FAS	0.279233	0.0250045	355
MESO	FASLG	-0.161315	0.233415	356
MESO	MLKL	0.183869	0.165581	197259
MESO	RIPK1	0.448852	0.000100835	8737
MESO	RIPK3	0.0252462	0.878493	11035
MESO	TLR3	0.391267	0.000929988	7098
MESO	TNF	-0.17639	0.185927	7124
OV	FADD	0.641146	1.79526e-35	8772
OV	FAS	0.23316	7.059e-05	355
OV	FASLG	-0.135863	0.0241273	356
OV	MLKL	0.204893	0.000525492	197259
OV	RIPK1	0.618426	1.85764e-32	8737
OV	RIPK3	0.186473	0.0016877	11035
OV	TLR3	0.350398	7.92115e-10	7098
OV	TNF	0.170832	0.0041675	7124
PAAD	FADD	0.35839	5.27307e-06	8772
PAAD	FAS	0.194463	0.0203241	355
PAAD	FASLG	-0.25865	0.00147852	356
PAAD	MLKL	0.307506	0.000121143	197259
PAAD	RIPK1	0.618774	4.64269e-18	8737
PAAD	RIPK3	0.113189	0.202171	11035
PAAD	TLR3	0.133104	0.127315	7098
PAAD	TNF	0.0444126	0.647561	7124
PCPG	FADD	0.353294	2.8638e-05	8772
PCPG	FAS	0.0977037	0.350901	355
PCPG	FASLG	-0.0174697	0.893016	356
PCPG	MLKL	-0.122204	0.226463	197259
PCPG	RIPK1	0.407258	7.09034e-07	8737
PCPG	RIPK3	-0.0614866	0.584361	11035
PCPG	TLR3	0.0978482	0.350036	7098
PCPG	TNF	0.0131611	0.920068	7124
PRAD	FADD	0.064418	0.251163	8772
PRAD	FAS	0.0925709	0.0825073	355
PRAD	FASLG	0.0666025	0.233314	356
PRAD	MLKL	0.238917	6.38342e-07	197259
PRAD	RIPK1	0.148765	0.00314742	8737
PRAD	RIPK3	-0.199662	4.3647e-05	11035
PRAD	TLR3	-0.0573278	0.315201	7098
PRAD	TNF	0.0316318	0.607493	7124
READ	FADD	0.627628	2.85563e-10	8772
READ	FAS	0.358423	0.00122766	355
READ	FASLG	0.0700416	0.617733	356
READ	MLKL	0.241725	0.0394815	197259
READ	RIPK1	0.588392	6.44095e-09	8737
READ	RIPK3	0.192771	0.112954	11035
READ	TLR3	0.286484	0.0123336	7098
READ	TNF	0.102912	0.440564	7124
SARC	FADD	0.4923	4.31003e-16	8772
SARC	FAS	0.258654	6.5507e-05	355
SARC	FASLG	-0.0167506	0.830001	356
SARC	MLKL	0.263983	4.4735e-05	197259
SARC	RIPK1	0.502942	7.87423e-17	8737
SARC	RIPK3	-0.038481	0.606791	11035
SARC	TLR3	0.291803	5.37201e-06	7098
SARC	TNF	-0.0580688	0.424913	7124
SKCM	FADD	0.528945	9.14668e-27	8772
SKCM	FAS	0.15217	0.00597029	355
SKCM	FASLG	-0.187867	0.000567304	356
SKCM	MLKL	0.0627258	0.292044	197259
SKCM	RIPK1	0.610846	2.31023e-37	8737
SKCM	RIPK3	0.0155706	0.812175	11035
SKCM	TLR3	0.302224	9.65113e-09	7098
SKCM	TNF	-0.0616028	0.301304	7124
STAD	FADD	0.45537	1.57237e-21	8772
STAD	FAS	0.311466	3.2568e-10	355
STAD	FASLG	-0.237009	2.67111e-06	356
STAD	MLKL	0.29287	3.98657e-09	197259
STAD	RIPK1	0.436916	9.35619e-20	8737
STAD	RIPK3	0.225945	8.1259e-06	11035
STAD	TLR3	0.415693	7.6379e-18	7098
STAD	TNF	0.00672155	0.915387	7124
TGCT	FADD	0.371819	1.3217e-05	8772
TGCT	FAS	0.0321702	0.768757	355
TGCT	FASLG	-0.144422	0.126632	356
TGCT	MLKL	0.1431	0.130653	197259
TGCT	RIPK1	0.252681	0.00456131	8737
TGCT	RIPK3	0.0172925	0.879991	11035
TGCT	TLR3	0.203902	0.0252929	7098
TGCT	TNF	-0.0180935	0.87403	7124
THCA	FADD	-0.035225	0.646144	8772
THCA	FAS	0.0704572	0.290168	355
THCA	FASLG	-0.00416045	0.964458	356
THCA	MLKL	0.127986	0.0278962	197259
THCA	RIPK1	0.0317497	0.685107	8737
THCA	RIPK3	0.00842843	0.924822	11035
THCA	TLR3	0.100291	0.10311	7098
THCA	TNF	-0.0486024	0.498884	7124
THYM	FADD	-0.208942	0.0842919	8772
THYM	FAS	0.111242	0.409599	355
THYM	FASLG	0.0363825	0.818159	356
THYM	MLKL	-0.152668	0.232572	197259
THYM	RIPK1	0.418753	6.2786e-05	8737
THYM	RIPK3	-0.0381047	0.8094	11035
THYM	TLR3	0.0812498	0.565241	7098
THYM	TNF	-0.132771	0.309895	7124
UCEC	FADD	0.415626	5.90304e-08	8772
UCEC	FAS	0.0598891	0.51972	355
UCEC	FASLG	-0.134441	0.117879	356
UCEC	MLKL	0.329594	2.6613e-05	197259
UCEC	RIPK1	0.256968	0.00138315	8737
UCEC	RIPK3	0.0205035	0.83841	11035
UCEC	TLR3	0.267514	0.000831779	7098
UCEC	TNF	0.104798	0.234714	7124
UCS	FADD	0.560902	5.5081e-05	8772
UCS	FAS	0.023104	0.904354	355
UCS	FASLG	-0.192383	0.238892	356
UCS	MLKL	0.125566	0.467307	197259
UCS	RIPK1	0.343814	0.0220808	8737
UCS	RIPK3	0.1472	0.383337	11035
UCS	TLR3	0.341741	0.0223706	7098
UCS	TNF	0.0209515	0.912482	7124
UVM	FADD	0.134994	0.433012	8772
UVM	FAS	0.0597491	0.762379	355
UVM	FASLG	0.153077	0.36326	356
UVM	MLKL	0.196899	0.215026	197259
UVM	RIPK1	0.439682	0.000531294	8737
UVM	RIPK3	0.0177456	0.935927	11035
UVM	TLR3	0.12776	0.462854	7098
UVM	TNF	-0.264765	0.0722852	7124
