# Supplementary material for: Multi-omics analysis reveals the panoramic picture of necroptosis-related regulators in pan-cancer
Source: Aging (Albany NY). 2022 Jun 21;14(12):5034–58. doi: 10.18632/aging.204124 (PMC9271292; doi:10.18632/aging.204124)
Supplement: Supplementary Material 5 [file aging-14-204124-s005.xlsx]

## Sheet: SheetName
cancertype	symbol	sur_type	log_rank_p	entrez
ACC	FADD	OS	0.0175743	8772
ACC	FAS	OS	0.00318765	355
ACC	FASLG	OS	0.0738684	356
ACC	MLKL	OS	0.0340952	197259
ACC	RIPK1	OS	0.476433	8737
ACC	RIPK3	OS	0.62891	11035
ACC	TLR3	OS	0.000125722	7098
ACC	TNF	OS	0.510625	7124
BLCA	FADD	OS	0.39766	8772
BLCA	FAS	OS	0.0228474	355
BLCA	FASLG	OS	0.717454	356
BLCA	MLKL	OS	0.636206	197259
BLCA	RIPK1	OS	0.193768	8737
BLCA	RIPK3	OS	0.0223849	11035
BLCA	TLR3	OS	0.762352	7098
BLCA	TNF	OS	0.377686	7124
BRCA	FADD	OS	0.522994	8772
BRCA	FAS	OS	0.656551	355
BRCA	FASLG	OS	0.917705	356
BRCA	MLKL	OS	0.804882	197259
BRCA	RIPK1	OS	0.972133	8737
BRCA	RIPK3	OS	0.20476	11035
BRCA	TLR3	OS	0.183003	7098
BRCA	TNF	OS	0.264404	7124
CESC	FADD	OS	0.411298	8772
CESC	FAS	OS	0.208049	355
CESC	FASLG	OS	0.739515	356
CESC	MLKL	OS	0.690788	197259
CESC	RIPK1	OS	0.846153	8737
CESC	RIPK3	OS	0.760044	11035
CESC	TLR3	OS	0.718762	7098
CESC	TNF	OS	0.775699	7124
CHOL	FADD	OS	0.0272529	8772
CHOL	FAS	OS	0.74815	355
CHOL	FASLG	OS	0.744164	356
CHOL	MLKL	OS	0.246519	197259
CHOL	RIPK1	OS	0.0552678	8737
CHOL	RIPK3	OS	0.465039	11035
CHOL	TLR3	OS	0.580773	7098
CHOL	TNF	OS	0.150539	7124
COAD	FADD	OS	0.280852	8772
COAD	FAS	OS	0.343044	355
COAD	FASLG	OS	0.599128	356
COAD	MLKL	OS	0.0598594	197259
COAD	RIPK1	OS	0.587446	8737
COAD	RIPK3	OS	0.747098	11035
COAD	TLR3	OS	0.115719	7098
COAD	TNF	OS	0.242092	7124
DLBC	FADD	OS	0.714485	8772
DLBC	FAS	OS	0.43897	355
DLBC	FASLG	OS	0.229291	356
DLBC	MLKL	OS	0.171594	197259
DLBC	RIPK1	OS	0.457695	8737
DLBC	RIPK3	OS	0.74655	11035
DLBC	TLR3	OS	0.205384	7098
DLBC	TNF	OS	0.997928	7124
ESCA	FADD	OS	0.834682	8772
ESCA	FAS	OS	0.968218	355
ESCA	FASLG	OS	0.191276	356
ESCA	MLKL	OS	0.037774	197259
ESCA	RIPK1	OS	0.974337	8737
ESCA	RIPK3	OS	0.962106	11035
ESCA	TLR3	OS	0.181588	7098
ESCA	TNF	OS	0.855821	7124
GBM	FADD	OS	0.319832	8772
GBM	FAS	OS	3.3943e-05	355
GBM	FASLG	OS	0.771465	356
GBM	MLKL	OS	0.254241	197259
GBM	RIPK1	OS	0.0018121	8737
GBM	RIPK3	OS	0.248063	11035
GBM	TLR3	OS	0.10099	7098
GBM	TNF	OS	0.00311055	7124
HNSC	FADD	OS	0.0811071	8772
HNSC	FAS	OS	0.811696	355
HNSC	FASLG	OS	0.0332875	356
HNSC	MLKL	OS	0.200846	197259
HNSC	RIPK1	OS	0.175601	8737
HNSC	RIPK3	OS	0.216856	11035
HNSC	TLR3	OS	0.68536	7098
HNSC	TNF	OS	0.268767	7124
KICH	FADD	OS	0.515154	8772
KICH	FAS	OS	0.347564	355
KICH	FASLG	OS	0.590373	356
KICH	MLKL	OS	1.42418e-08	197259
KICH	RIPK1	OS	0.884618	8737
KICH	RIPK3	OS	0.53936	11035
KICH	TLR3	OS	0.000124298	7098
KICH	TNF	OS	0.884618	7124
KIRC	FADD	OS	0.0029521	8772
KIRC	FAS	OS	0.424541	355
KIRC	FASLG	OS	0.0929336	356
KIRC	MLKL	OS	0.731879	197259
KIRC	RIPK1	OS	0.765659	8737
KIRC	RIPK3	OS	0.000790071	11035
KIRC	TLR3	OS	0.00148269	7098
KIRC	TNF	OS	0.719886	7124
KIRP	FADD	OS	0.0119927	8772
KIRP	FAS	OS	0.00381153	355
KIRP	FASLG	OS	6.34867e-07	356
KIRP	MLKL	OS	9.0234e-05	197259
KIRP	RIPK1	OS	1.1136e-05	8737
KIRP	RIPK3	OS	5.85483e-06	11035
KIRP	TLR3	OS	5.1632e-05	7098
KIRP	TNF	OS	1.6791e-07	7124
LAML	FADD	OS	0.381383	8772
LAML	FAS	OS	3.36069e-06	355
LAML	MLKL	OS	0.150908	197259
LAML	RIPK1	OS	0.201773	8737
LAML	RIPK3	OS	3.6083e-05	11035
LAML	TLR3	OS	0.000199129	7098
LGG	FADD	OS	2.09299e-06	8772
LGG	FAS	OS	0	355
LGG	FASLG	OS	0.67963	356
LGG	MLKL	OS	0.167039	197259
LGG	RIPK1	OS	0.000899397	8737
LGG	RIPK3	OS	4.71198e-10	11035
LGG	TLR3	OS	0.344302	7098
LGG	TNF	OS	0.000142261	7124
LIHC	FADD	OS	0.331472	8772
LIHC	FAS	OS	0.37482	355
LIHC	FASLG	OS	0.0678891	356
LIHC	MLKL	OS	0.318697	197259
LIHC	RIPK1	OS	0.282009	8737
LIHC	RIPK3	OS	0.0590975	11035
LIHC	TLR3	OS	0.0251454	7098
LIHC	TNF	OS	0.000752268	7124
LUAD	FADD	OS	0.176521	8772
LUAD	FAS	OS	0.615403	355
LUAD	FASLG	OS	0.980207	356
LUAD	MLKL	OS	0.707903	197259
LUAD	RIPK1	OS	0.34981	8737
LUAD	RIPK3	OS	0.731772	11035
LUAD	TLR3	OS	0.64115	7098
LUAD	TNF	OS	0.319689	7124
LUSC	FADD	OS	0.503451	8772
LUSC	FAS	OS	0.600063	355
LUSC	FASLG	OS	0.544289	356
LUSC	MLKL	OS	0.324907	197259
LUSC	RIPK1	OS	0.589896	8737
LUSC	RIPK3	OS	0.103762	11035
LUSC	TLR3	OS	0.657891	7098
LUSC	TNF	OS	0.887365	7124
MESO	FADD	OS	5.7952e-05	8772
MESO	FAS	OS	0.0180184	355
MESO	FASLG	OS	0.0814884	356
MESO	MLKL	OS	0.0570906	197259
MESO	RIPK1	OS	0.0936819	8737
MESO	RIPK3	OS	3.40728e-06	11035
MESO	TLR3	OS	0	7098
MESO	TNF	OS	0.0107193	7124
OV	FADD	OS	0.0746722	8772
OV	FAS	OS	0.102933	355
OV	FASLG	OS	0.511686	356
OV	MLKL	OS	0.103163	197259
OV	RIPK1	OS	0.494828	8737
OV	RIPK3	OS	0.303655	11035
OV	TLR3	OS	0.825197	7098
OV	TNF	OS	0.0713719	7124
PAAD	FADD	OS	0.0153148	8772
PAAD	FAS	OS	0.317221	355
PAAD	FASLG	OS	0.313058	356
PAAD	MLKL	OS	0.212063	197259
PAAD	RIPK1	OS	0.306972	8737
PAAD	RIPK3	OS	0.521817	11035
PAAD	TLR3	OS	0.367324	7098
PAAD	TNF	OS	0.414557	7124
PCPG	FADD	OS	0.911034	8772
PCPG	FAS	OS	0.826982	355
PCPG	FASLG	OS	0.0532448	356
PCPG	MLKL	OS	0.173603	197259
PCPG	RIPK1	OS	0.00344282	8737
PCPG	RIPK3	OS	0.565441	11035
PCPG	TLR3	OS	0.00561462	7098
PCPG	TNF	OS	0.773328	7124
PRAD	FADD	OS	0.710749	8772
PRAD	FAS	OS	0.871184	355
PRAD	FASLG	OS	0.724553	356
PRAD	MLKL	OS	1.6761e-05	197259
PRAD	RIPK1	OS	0.260723	8737
PRAD	RIPK3	OS	0.0596286	11035
PRAD	TLR3	OS	0.618561	7098
PRAD	TNF	OS	0.30156	7124
READ	FADD	OS	0.257646	8772
READ	FAS	OS	0.196758	355
READ	FASLG	OS	0.551601	356
READ	MLKL	OS	0.528341	197259
READ	RIPK1	OS	0.219137	8737
READ	RIPK3	OS	0.641297	11035
READ	TLR3	OS	0.418804	7098
READ	TNF	OS	0.00920572	7124
SARC	FADD	OS	0.0533639	8772
SARC	FAS	OS	0.0945244	355
SARC	FASLG	OS	0.053992	356
SARC	MLKL	OS	0.202829	197259
SARC	RIPK1	OS	0.00064514	8737
SARC	RIPK3	OS	0.14901	11035
SARC	TLR3	OS	0.362166	7098
SARC	TNF	OS	0.0335943	7124
SKCM	FADD	OS	0.839661	8772
SKCM	FAS	OS	0.62015	355
SKCM	FASLG	OS	0.481588	356
SKCM	MLKL	OS	0.996363	197259
SKCM	RIPK1	OS	0.0823522	8737
SKCM	RIPK3	OS	0.508732	11035
SKCM	TLR3	OS	0.963324	7098
SKCM	TNF	OS	0.0339608	7124
STAD	FADD	OS	0.841418	8772
STAD	FAS	OS	0.0920999	355
STAD	FASLG	OS	0.383764	356
STAD	MLKL	OS	0.286891	197259
STAD	RIPK1	OS	0.0664146	8737
STAD	RIPK3	OS	0.203733	11035
STAD	TLR3	OS	0.943051	7098
STAD	TNF	OS	0.157908	7124
TGCT	FADD	OS	0.93971	8772
TGCT	FAS	OS	0.512105	355
TGCT	FASLG	OS	0	356
TGCT	MLKL	OS	0.167984	197259
TGCT	RIPK1	OS	0.815555	8737
TGCT	RIPK3	OS	0.318723	11035
TGCT	TLR3	OS	0.568573	7098
TGCT	TNF	OS	0.548647	7124
THCA	FADD	OS	0.0624569	8772
THCA	FAS	OS	0.813645	355
THCA	FASLG	OS	0.441444	356
THCA	MLKL	OS	0.087275	197259
THCA	RIPK1	OS	0.000533641	8737
THCA	RIPK3	OS	0.567558	11035
THCA	TLR3	OS	0.0299616	7098
THCA	TNF	OS	0.000532148	7124
THYM	FADD	OS	0.426558	8772
THYM	FAS	OS	0.838692	355
THYM	FASLG	OS	5.2662e-05	356
THYM	MLKL	OS	0.182374	197259
THYM	RIPK1	OS	0.0056265	8737
THYM	RIPK3	OS	0.697491	11035
THYM	TLR3	OS	0.69119	7098
THYM	TNF	OS	0.003519	7124
UCEC	FADD	OS	0.00328765	8772
UCEC	FAS	OS	2.0213e-05	355
UCEC	FASLG	OS	0.0195564	356
UCEC	MLKL	OS	0.032899	197259
UCEC	RIPK1	OS	0.0191694	8737
UCEC	RIPK3	OS	0.0320141	11035
UCEC	TLR3	OS	8.1405e-05	7098
UCEC	TNF	OS	0.00820915	7124
UCS	FADD	OS	0.991011	8772
UCS	FAS	OS	0.7709	355
UCS	FASLG	OS	0.278114	356
UCS	MLKL	OS	0.14683	197259
UCS	RIPK1	OS	0.656403	8737
UCS	RIPK3	OS	0.147003	11035
UCS	TLR3	OS	0.288723	7098
UCS	TNF	OS	0.569077	7124
UVM	FADD	OS	0.609553	8772
UVM	FASLG	OS	0.112029	356
UVM	MLKL	OS	0.0506934	197259
UVM	RIPK1	OS	0.00113471	8737
UVM	RIPK3	OS	0.0946046	11035
UVM	TLR3	OS	0.190979	7098
UVM	TNF	OS	0.00737933	7124
