# Supplementary material for: Multi-omics analysis reveals the panoramic picture of necroptosis-related regulators in pan-cancer
Source: Aging (Albany NY). 2022 Jun 21;14(12):5034–58. doi: 10.18632/aging.204124 (PMC9271292; doi:10.18632/aging.204124)
Supplement: Supplementary Material 6 [file aging-14-204124-s006.xlsx]

## Sheet: SheetName
cancertype	symbol	pathway	fdr	class	diff	entrez
ACC	FADD	Apoptosis	0.515102	None	-0.418809299	8772
ACC	FADD	CellCycle	0.515102	None	-0.404443914	8772
ACC	FADD	DNADamage	0.515102	None	-0.609558194	8772
ACC	FADD	EMT	0.515102	None	0.421296509	8772
ACC	FADD	Hormone AR	0.296016	None	-0.690903462	8772
ACC	FADD	Hormone ER	0.891898	None	-0.069760702	8772
ACC	FADD	PI3KAKT	0.296016	None	1.419939428	8772
ACC	FADD	RASMAPK	0.296016	None	0.645966611	8772
ACC	FADD	RTK	0.97462	None	0.013644364	8772
ACC	FADD	TSCmTOR	0.296016	None	0.579641687	8772
ACC	FAS	Apoptosis	0.192844	None	-0.835303275	355
ACC	FAS	CellCycle	0.0936176	None	-1.247394864	355
ACC	FAS	DNADamage	0.146334	None	-1.131142824	355
ACC	FAS	EMT	0.382495	None	-0.624289931	355
ACC	FAS	Hormone AR	0.607495	None	-0.395899026	355
ACC	FAS	Hormone ER	0.171718	None	0.528938737	355
ACC	FAS	PI3KAKT	0.872701	None	-0.188410087	355
ACC	FAS	RASMAPK	0.722557	None	0.247426603	355
ACC	FAS	RTK	0.74203	None	-0.226149786	355
ACC	FAS	TSCmTOR	0.9275	None	-0.031831561	355
ACC	FASLG	Apoptosis	0.385455	None	-0.589822396	356
ACC	FASLG	CellCycle	0.871381	None	-0.114279746	356
ACC	FASLG	DNADamage	0.272976	None	0.845591725	356
ACC	FASLG	EMT	0.385455	None	-0.575687113	356
ACC	FASLG	Hormone AR	0.871381	None	-0.104772472	356
ACC	FASLG	Hormone ER	0.0170367	Activation	0.831790266	356
ACC	FASLG	PI3KAKT	0.481822	None	-0.660486345	356
ACC	FASLG	RASMAPK	0.272976	None	0.588556771	356
ACC	FASLG	RTK	0.272976	None	0.684450988	356
ACC	FASLG	TSCmTOR	0.871381	None	-0.056633901	356
ACC	MLKL	Apoptosis	0.669841	None	-0.315767461	197259
ACC	MLKL	CellCycle	0.629191	None	-0.394195821	197259
ACC	MLKL	DNADamage	0.591879	None	0.733122756	197259
ACC	MLKL	EMT	0.980575	None	-0.013026141	197259
ACC	MLKL	Hormone AR	0.591879	None	0.451546818	197259
ACC	MLKL	Hormone ER	0.591879	None	0.317113566	197259
ACC	MLKL	PI3KAKT	0.89508	None	-0.169358927	197259
ACC	MLKL	RASMAPK	0.591879	None	0.429837748	197259
ACC	MLKL	RTK	0.278044	None	0.956960339	197259
ACC	MLKL	TSCmTOR	0.629191	None	0.293845566	197259
ACC	RIPK1	Apoptosis	0.969936	None	-0.029059075	8737
ACC	RIPK1	CellCycle	0.500742	None	-0.401565873	8737
ACC	RIPK1	DNADamage	0.969936	None	-0.020961866	8737
ACC	RIPK1	EMT	0.3619	None	0.829987214	8737
ACC	RIPK1	Hormone AR	0.3619	None	-0.627880943	8737
ACC	RIPK1	Hormone ER	0.404015	None	-0.305630444	8737
ACC	RIPK1	PI3KAKT	0.404015	None	0.75783956	8737
ACC	RIPK1	RASMAPK	0.3619	None	0.495809024	8737
ACC	RIPK1	RTK	0.3619	None	0.645420265	8737
ACC	RIPK1	TSCmTOR	0.3619	None	0.479658265	8737
ACC	RIPK3	Apoptosis	0.534245	None	-0.540378063	11035
ACC	RIPK3	CellCycle	0.766178	None	-0.23341478	11035
ACC	RIPK3	DNADamage	0.818761	None	0.161786613	11035
ACC	RIPK3	EMT	0.534245	None	-0.599035644	11035
ACC	RIPK3	Hormone AR	0.944286	None	0.030959331	11035
ACC	RIPK3	Hormone ER	0.534245	None	0.422686439	11035
ACC	RIPK3	PI3KAKT	0.337631	None	-1.453349088	11035
ACC	RIPK3	RASMAPK	0.766178	None	0.209266635	11035
ACC	RIPK3	RTK	0.766178	None	0.285865561	11035
ACC	RIPK3	TSCmTOR	0.534245	None	-0.470900007	11035
ACC	TLR3	Apoptosis	0.259933	None	-0.869373952	7098
ACC	TLR3	CellCycle	0.259933	None	-0.972203157	7098
ACC	TLR3	DNADamage	0.259933	None	-1.032687053	7098
ACC	TLR3	EMT	0.581626	None	-0.597516367	7098
ACC	TLR3	Hormone AR	0.919807	None	-0.14594577	7098
ACC	TLR3	Hormone ER	0.955711	None	-0.042185045	7098
ACC	TLR3	PI3KAKT	0.919807	None	-0.282892645	7098
ACC	TLR3	RASMAPK	0.738178	None	0.362359772	7098
ACC	TLR3	RTK	0.955711	None	0.022724274	7098
ACC	TLR3	TSCmTOR	0.919807	None	-0.1588332	7098
ACC	TNF	Apoptosis	0.884371	None	-0.219201332	7124
ACC	TNF	CellCycle	0.884371	None	-0.135655091	7124
ACC	TNF	DNADamage	0.837595	None	0.575947255	7124
ACC	TNF	EMT	0.884371	None	-0.070123424	7124
ACC	TNF	Hormone AR	0.837595	None	-0.419936944	7124
ACC	TNF	Hormone ER	0.884371	None	0.091645312	7124
ACC	TNF	PI3KAKT	0.884371	None	0.270131515	7124
ACC	TNF	RASMAPK	0.837595	None	0.402474671	7124
ACC	TNF	RTK	0.837595	None	0.512296289	7124
ACC	TNF	TSCmTOR	0.884371	None	0.090246396	7124
BLCA	FADD	Apoptosis	0.0102623	Activation	0.495723956	8772
BLCA	FADD	CellCycle	0.949454	None	-0.06616678	8772
BLCA	FADD	DNADamage	0.00375173	Inhibition	-0.506066832	8772
BLCA	FADD	EMT	0.0241817	Activation	0.865050386	8772
BLCA	FADD	Hormone AR	0.000486089	Inhibition	-0.741184988	8772
BLCA	FADD	Hormone ER	0.659793	None	-0.059998628	8772
BLCA	FADD	PI3KAKT	0.955363	None	0.04304052	8772
BLCA	FADD	RASMAPK	0.659793	None	0.174764457	8772
BLCA	FADD	RTK	0.996765	None	0.000920705	8772
BLCA	FADD	TSCmTOR	0.949454	None	0.048239115	8772
BLCA	FAS	Apoptosis	5.18344e-09	Activation	0.984946761	355
BLCA	FAS	CellCycle	0.0560223	None	-0.336484749	355
BLCA	FAS	DNADamage	5.62143e-09	Inhibition	-0.882155436	355
BLCA	FAS	EMT	3.89278e-15	Activation	2.573659082	355
BLCA	FAS	Hormone AR	8.39201e-18	Inhibition	-1.545773117	355
BLCA	FAS	Hormone ER	0.00106668	Activation	0.237760518	355
BLCA	FAS	PI3KAKT	0.400663	None	-0.222753037	355
BLCA	FAS	RASMAPK	0.597968	None	-0.101477139	355
BLCA	FAS	RTK	3.1418e-05	Inhibition	-0.971044618	355
BLCA	FAS	TSCmTOR	0.00867069	Inhibition	-0.429873206	355
BLCA	FASLG	Apoptosis	3.7205e-17	Activation	1.387918221	356
BLCA	FASLG	CellCycle	0.841162	None	0.033672774	356
BLCA	FASLG	DNADamage	0.046431	Inhibition	-0.331883207	356
BLCA	FASLG	EMT	2.90122e-09	Activation	2.022768031	356
BLCA	FASLG	Hormone AR	3.20104e-06	Inhibition	-0.889649403	356
BLCA	FASLG	Hormone ER	8.4934e-06	Activation	0.319864929	356
BLCA	FASLG	PI3KAKT	0.13726	None	-0.3748456	356
BLCA	FASLG	RASMAPK	0.13726	None	-0.298379858	356
BLCA	FASLG	RTK	3.82314e-06	Inhibition	-1.074701815	356
BLCA	FASLG	TSCmTOR	0.0842075	None	-0.296580142	356
BLCA	MLKL	Apoptosis	1.30503e-06	Activation	0.845747353	197259
BLCA	MLKL	CellCycle	0.034221	Inhibition	-0.402520206	197259
BLCA	MLKL	DNADamage	8.17444e-06	Inhibition	-0.69602116	197259
BLCA	MLKL	EMT	1.94246e-06	Activation	1.636571525	197259
BLCA	MLKL	Hormone AR	1.32151e-10	Inhibition	-1.208298411	197259
BLCA	MLKL	Hormone ER	0.351898	None	0.075893816	197259
BLCA	MLKL	PI3KAKT	0.851971	None	0.045664607	197259
BLCA	MLKL	RASMAPK	0.21928	None	0.2756547	197259
BLCA	MLKL	RTK	0.21928	None	-0.336386791	197259
BLCA	MLKL	TSCmTOR	0.851971	None	0.043546613	197259
BLCA	RIPK1	Apoptosis	0.588437	None	0.155479158	8737
BLCA	RIPK1	CellCycle	0.117074	None	-0.406197595	8737
BLCA	RIPK1	DNADamage	0.664199	None	-0.070316971	8737
BLCA	RIPK1	EMT	0.331349	None	-0.505504514	8737
BLCA	RIPK1	Hormone AR	0.588437	None	-0.151800329	8737
BLCA	RIPK1	Hormone ER	0.664199	None	-0.031705395	8737
BLCA	RIPK1	PI3KAKT	0.664199	None	0.10576762	8737
BLCA	RIPK1	RASMAPK	0.338608	None	0.264652002	8737
BLCA	RIPK1	RTK	0.117074	None	0.515569837	8737
BLCA	RIPK1	TSCmTOR	0.160398	None	0.310348886	8737
BLCA	RIPK3	Apoptosis	0.166165	None	-0.291717746	11035
BLCA	RIPK3	CellCycle	4.81181e-06	Inhibition	-0.831756107	11035
BLCA	RIPK3	DNADamage	0.682593	None	-0.107714478	11035
BLCA	RIPK3	EMT	0.0591808	None	-0.84160184	11035
BLCA	RIPK3	Hormone AR	0.0834146	None	0.413413591	11035
BLCA	RIPK3	Hormone ER	0.151395	None	-0.132454688	11035
BLCA	RIPK3	PI3KAKT	0.996361	None	-0.001113192	11035
BLCA	RIPK3	RASMAPK	0.552379	None	0.187023737	11035
BLCA	RIPK3	RTK	0.775911	None	0.087928979	11035
BLCA	RIPK3	TSCmTOR	0.775911	None	0.073366358	11035
BLCA	TLR3	Apoptosis	0.185493	None	0.300119709	7098
BLCA	TLR3	CellCycle	0.00603046	Inhibition	-0.571088653	7098
BLCA	TLR3	DNADamage	0.00963146	Inhibition	-0.467480355	7098
BLCA	TLR3	EMT	0.845751	None	0.159825394	7098
BLCA	TLR3	Hormone AR	0.28051	None	-0.272380359	7098
BLCA	TLR3	Hormone ER	0.146894	None	0.141833701	7098
BLCA	TLR3	PI3KAKT	0.845751	None	0.047941786	7098
BLCA	TLR3	RASMAPK	0.845751	None	0.037479171	7098
BLCA	TLR3	RTK	0.845751	None	0.057991892	7098
BLCA	TLR3	TSCmTOR	0.845751	None	-0.103821983	7098
BLCA	TNF	Apoptosis	4.00584e-07	Activation	0.895984725	7124
BLCA	TNF	CellCycle	0.983401	None	-0.003493861	7124
BLCA	TNF	DNADamage	0.00102117	Inhibition	-0.530814621	7124
BLCA	TNF	EMT	2.6506e-05	Activation	1.480089666	7124
BLCA	TNF	Hormone AR	4.00584e-07	Inhibition	-0.972993676	7124
BLCA	TNF	Hormone ER	0.0097601	Activation	0.193993868	7124
BLCA	TNF	PI3KAKT	0.0230274	Activation	0.572278711	7124
BLCA	TNF	RASMAPK	0.00196799	Activation	0.630551018	7124
BLCA	TNF	RTK	0.148162	None	-0.339777336	7124
BLCA	TNF	TSCmTOR	0.0230274	Activation	0.371169874	7124
BRCA	FADD	Apoptosis	0.0662325	None	0.226330974	8772
BRCA	FADD	CellCycle	0.00174723	Activation	0.491391698	8772
BRCA	FADD	DNADamage	0.516306	None	0.089927034	8772
BRCA	FADD	EMT	0.0590464	None	-0.441471852	8772
BRCA	FADD	Hormone AR	0.464698	None	0.192507269	8772
BRCA	FADD	Hormone ER	0.516306	None	0.183674949	8772
BRCA	FADD	PI3KAKT	0.0284512	Inhibition	-0.43063139	8772
BRCA	FADD	RASMAPK	0.0057333	Inhibition	-0.455339936	8772
BRCA	FADD	RTK	0.140442	None	-0.201545111	8772
BRCA	FADD	TSCmTOR	0.122109	None	0.201599259	8772
BRCA	FAS	Apoptosis	1.30838e-08	Activation	0.614950235	355
BRCA	FAS	CellCycle	0.0282612	Inhibition	-0.305835908	355
BRCA	FAS	DNADamage	1.8337e-05	Inhibition	-0.575858618	355
BRCA	FAS	EMT	1.04551e-13	Activation	1.463421916	355
BRCA	FAS	Hormone AR	7.81184e-16	Inhibition	-1.762332045	355
BRCA	FAS	Hormone ER	1.04551e-13	Inhibition	-2.115471407	355
BRCA	FAS	PI3KAKT	0.0436388	Activation	0.345735084	355
BRCA	FAS	RASMAPK	2.43127e-06	Activation	0.676775035	355
BRCA	FAS	RTK	0.101002	None	0.206249728	355
BRCA	FAS	TSCmTOR	0.883116	None	-0.016570518	355
BRCA	FASLG	Apoptosis	7.13459e-20	Activation	0.971640726	356
BRCA	FASLG	CellCycle	0.0577667	None	0.274440689	356
BRCA	FASLG	DNADamage	0.831264	None	0.028093209	356
BRCA	FASLG	EMT	0.00366307	Activation	0.620629152	356
BRCA	FASLG	Hormone AR	1.9504e-05	Inhibition	-0.971956779	356
BRCA	FASLG	Hormone ER	1.06758e-07	Inhibition	-1.573001099	356
BRCA	FASLG	PI3KAKT	0.00373065	Activation	0.508819894	356
BRCA	FASLG	RASMAPK	0.831264	None	0.044589667	356
BRCA	FASLG	RTK	0.831264	None	0.037293126	356
BRCA	FASLG	TSCmTOR	0.0577667	None	0.230859452	356
BRCA	MLKL	Apoptosis	8.86579e-18	Activation	0.920216512	197259
BRCA	MLKL	CellCycle	0.000719241	Activation	0.474793589	197259
BRCA	MLKL	DNADamage	0.0206065	Activation	0.329704707	197259
BRCA	MLKL	EMT	0.40132	None	0.1939632	197259
BRCA	MLKL	Hormone AR	5.61858e-16	Inhibition	-1.749315376	197259
BRCA	MLKL	Hormone ER	5.61858e-16	Inhibition	-2.28838907	197259
BRCA	MLKL	PI3KAKT	0.0368731	Activation	0.364948773	197259
BRCA	MLKL	RASMAPK	0.89558	None	0.018434167	197259
BRCA	MLKL	RTK	0.439741	None	-0.103640549	197259
BRCA	MLKL	TSCmTOR	0.00391751	Activation	0.347685085	197259
BRCA	RIPK1	Apoptosis	0.0605855	None	0.203687157	8737
BRCA	RIPK1	CellCycle	0.000376818	Inhibition	-0.495730451	8737
BRCA	RIPK1	DNADamage	0.0012215	Inhibition	-0.450953515	8737
BRCA	RIPK1	EMT	6.44585e-06	Activation	0.92440954	8737
BRCA	RIPK1	Hormone AR	0.0933779	None	-0.360254421	8737
BRCA	RIPK1	Hormone ER	0.0519362	None	-0.586206693	8737
BRCA	RIPK1	PI3KAKT	0.00152271	Activation	0.542437278	8737
BRCA	RIPK1	RASMAPK	2.04589e-08	Activation	0.817604203	8737
BRCA	RIPK1	RTK	1.27166e-11	Activation	0.860450321	8737
BRCA	RIPK1	TSCmTOR	0.0519362	None	0.229539239	8737
BRCA	RIPK3	Apoptosis	1.3177e-05	Inhibition	-0.483087304	11035
BRCA	RIPK3	CellCycle	3.29406e-17	Inhibition	-1.113023434	11035
BRCA	RIPK3	DNADamage	0.000343021	Inhibition	-0.496055349	11035
BRCA	RIPK3	EMT	0.00119682	Activation	0.662642982	11035
BRCA	RIPK3	Hormone AR	1.57403e-13	Activation	1.593649523	11035
BRCA	RIPK3	Hormone ER	1.22798e-15	Activation	2.266302497	11035
BRCA	RIPK3	PI3KAKT	0.0189759	Inhibition	-0.402126032	11035
BRCA	RIPK3	RASMAPK	0.116245	None	0.220714081	11035
BRCA	RIPK3	RTK	0.0704715	None	-0.224476129	11035
BRCA	RIPK3	TSCmTOR	0.0704715	None	-0.212411866	11035
BRCA	TLR3	Apoptosis	0.369579	None	0.103006918	7098
BRCA	TLR3	CellCycle	6.31966e-19	Inhibition	-1.174800408	7098
BRCA	TLR3	DNADamage	0.000498432	Inhibition	-0.481079352	7098
BRCA	TLR3	EMT	1.7396e-05	Activation	0.900646888	7098
BRCA	TLR3	Hormone AR	0.00122245	Activation	0.727299034	7098
BRCA	TLR3	Hormone ER	2.3836e-05	Activation	1.264070571	7098
BRCA	TLR3	PI3KAKT	0.125133	None	-0.269963243	7098
BRCA	TLR3	RASMAPK	6.1497e-05	Activation	0.589120678	7098
BRCA	TLR3	RTK	0.695037	None	0.047921717	7098
BRCA	TLR3	TSCmTOR	0.00243613	Inhibition	-0.352508754	7098
BRCA	TNF	Apoptosis	8.3945e-05	Activation	0.434047345	7124
BRCA	TNF	CellCycle	9.5607e-05	Activation	0.526886789	7124
BRCA	TNF	DNADamage	0.640127	None	0.073772524	7124
BRCA	TNF	EMT	0.201274	None	0.273757712	7124
BRCA	TNF	Hormone AR	8.15608e-07	Inhibition	-1.14751972	7124
BRCA	TNF	Hormone ER	8.3945e-05	Inhibition	-1.157275142	7124
BRCA	TNF	PI3KAKT	4.923e-05	Activation	0.706832717	7124
BRCA	TNF	RASMAPK	0.0038386	Activation	0.420546752	7124
BRCA	TNF	RTK	0.80244	None	0.030515779	7124
BRCA	TNF	TSCmTOR	2.51908e-06	Activation	0.562002918	7124
CESC	FADD	Apoptosis	0.83488	None	-0.04435868	8772
CESC	FADD	CellCycle	0.778198	None	-0.067109746	8772
CESC	FADD	DNADamage	0.366947	None	-0.370923299	8772
CESC	FADD	EMT	0.778198	None	0.163000946	8772
CESC	FADD	Hormone AR	0.53301	None	-0.261901862	8772
CESC	FADD	Hormone ER	0.536284	None	-0.171602777	8772
CESC	FADD	PI3KAKT	0.196621	None	-0.726186472	8772
CESC	FADD	RASMAPK	0.366947	None	0.444922245	8772
CESC	FADD	RTK	0.270706	None	0.578765256	8772
CESC	FADD	TSCmTOR	0.53301	None	0.204720925	8772
CESC	FAS	Apoptosis	0.852229	None	0.088677099	355
CESC	FAS	CellCycle	0.267107	None	-0.336126094	355
CESC	FAS	DNADamage	0.404961	None	-0.403789256	355
CESC	FAS	EMT	0.431371	None	0.522957178	355
CESC	FAS	Hormone AR	0.851599	None	-0.137612677	355
CESC	FAS	Hormone ER	0.930856	None	0.016892478	355
CESC	FAS	PI3KAKT	0.216831	None	-0.734236932	355
CESC	FAS	RASMAPK	0.851599	None	-0.151451201	355
CESC	FAS	RTK	0.898756	None	0.072002157	355
CESC	FAS	TSCmTOR	0.851599	None	-0.123074223	355
CESC	FASLG	Apoptosis	0.174241	None	0.505096457	356
CESC	FASLG	CellCycle	0.577726	None	0.141943314	356
CESC	FASLG	DNADamage	0.723084	None	-0.092580804	356
CESC	FASLG	EMT	0.577726	None	-0.31219896	356
CESC	FASLG	Hormone AR	0.577726	None	0.184986781	356
CESC	FASLG	Hormone ER	0.577726	None	0.225366131	356
CESC	FASLG	PI3KAKT	0.685953	None	0.158465145	356
CESC	FASLG	RASMAPK	0.424126	None	0.438242866	356
CESC	FASLG	RTK	0.577726	None	0.241691765	356
CESC	FASLG	TSCmTOR	0.424126	None	0.352843693	356
CESC	MLKL	Apoptosis	0.00173467	Activation	0.782938427	197259
CESC	MLKL	CellCycle	0.0907386	None	0.361008316	197259
CESC	MLKL	DNADamage	0.241062	None	-0.396091861	197259
CESC	MLKL	EMT	0.987832	None	-0.005924263	197259
CESC	MLKL	Hormone AR	0.629108	None	-0.180671799	197259
CESC	MLKL	Hormone ER	0.929448	None	-0.039398712	197259
CESC	MLKL	PI3KAKT	0.629108	None	-0.21111075	197259
CESC	MLKL	RASMAPK	0.047645	Activation	0.73287321	197259
CESC	MLKL	RTK	0.380153	None	0.361586287	197259
CESC	MLKL	TSCmTOR	0.0705184	None	0.47424026	197259
CESC	RIPK1	Apoptosis	0.809798	None	0.116581781	8737
CESC	RIPK1	CellCycle	0.989365	None	-0.012918663	8737
CESC	RIPK1	DNADamage	0.453604	None	-0.275959342	8737
CESC	RIPK1	EMT	0.989365	None	0.005275394	8737
CESC	RIPK1	Hormone AR	0.0551095	None	-0.560391416	8737
CESC	RIPK1	Hormone ER	0.809798	None	-0.085834184	8737
CESC	RIPK1	PI3KAKT	0.0630943	None	0.686319523	8737
CESC	RIPK1	RASMAPK	0.0124483	Activation	0.850492986	8737
CESC	RIPK1	RTK	0.0175976	Activation	0.846279086	8737
CESC	RIPK1	TSCmTOR	0.0116713	Activation	0.656363254	8737
CESC	RIPK3	Apoptosis	0.108272	None	0.537689259	11035
CESC	RIPK3	CellCycle	0.351508	None	0.254938228	11035
CESC	RIPK3	DNADamage	0.582239	None	0.206037556	11035
CESC	RIPK3	EMT	0.197222	None	-0.795314198	11035
CESC	RIPK3	Hormone AR	0.334611	None	0.406510836	11035
CESC	RIPK3	Hormone ER	0.84243	None	0.058652972	11035
CESC	RIPK3	PI3KAKT	0.582239	None	-0.329163629	11035
CESC	RIPK3	RASMAPK	0.582239	None	0.207985233	11035
CESC	RIPK3	RTK	0.994761	None	0.001974557	11035
CESC	RIPK3	TSCmTOR	0.582239	None	0.167198022	11035
CESC	TLR3	Apoptosis	0.20982	None	0.392376933	7098
CESC	TLR3	CellCycle	0.803653	None	0.049750576	7098
CESC	TLR3	DNADamage	0.785438	None	-0.122347779	7098
CESC	TLR3	EMT	0.533338	None	-0.426702659	7098
CESC	TLR3	Hormone AR	0.803653	None	0.061552132	7098
CESC	TLR3	Hormone ER	0.533338	None	0.213755156	7098
CESC	TLR3	PI3KAKT	0.728112	None	-0.207590879	7098
CESC	TLR3	RASMAPK	0.0919662	None	0.666118762	7098
CESC	TLR3	RTK	0.0799712	None	0.78282946	7098
CESC	TLR3	TSCmTOR	0.728112	None	0.152043217	7098
CESC	TNF	Apoptosis	0.636009	None	0.120662005	7124
CESC	TNF	CellCycle	0.85018	None	-0.032952886	7124
CESC	TNF	DNADamage	0.0416976	Inhibition	-0.714431218	7124
CESC	TNF	EMT	0.278107	None	0.503521093	7124
CESC	TNF	Hormone AR	0.0726946	None	-0.499538792	7124
CESC	TNF	Hormone ER	0.0497084	Inhibition	-0.46630097	7124
CESC	TNF	PI3KAKT	0.554967	None	-0.242292607	7124
CESC	TNF	RASMAPK	0.0416976	Activation	0.745375862	7124
CESC	TNF	RTK	0.0726946	None	0.636491524	7124
CESC	TNF	TSCmTOR	0.0726946	None	0.422820466	7124
CHOL	FADD	Apoptosis	0.979498	None	0.009520853	8772
CHOL	FADD	CellCycle	0.797935	None	0.270632529	8772
CHOL	FADD	DNADamage	0.966373	None	0.162232494	8772
CHOL	FADD	EMT	0.708231	None	1.049353951	8772
CHOL	FADD	Hormone AR	0.708231	None	-0.432075819	8772
CHOL	FADD	Hormone ER	0.897982	None	-0.14783353	8772
CHOL	FADD	PI3KAKT	0.975091	None	0.081930399	8772
CHOL	FADD	RASMAPK	0.897982	None	0.249750413	8772
CHOL	FADD	RTK	0.708231	None	0.511396163	8772
CHOL	FADD	TSCmTOR	0.708231	None	0.503095234	8772
CHOL	FAS	Apoptosis	0.759711	None	-0.653361328	355
CHOL	FAS	CellCycle	0.759711	None	-0.244237247	355
CHOL	FAS	DNADamage	0.759711	None	0.298709405	355
CHOL	FAS	EMT	0.759711	None	-0.398629219	355
CHOL	FAS	Hormone AR	0.759711	None	0.349385272	355
CHOL	FAS	Hormone ER	0.778038	None	0.083850882	355
CHOL	FAS	PI3KAKT	0.778038	None	0.173440504	355
CHOL	FAS	RASMAPK	0.759711	None	0.251108816	355
CHOL	FAS	RTK	0.759711	None	0.38520029	355
CHOL	FAS	TSCmTOR	0.759711	None	0.644136558	355
CHOL	FASLG	Apoptosis	0.845851	None	0.154230297	356
CHOL	FASLG	CellCycle	0.845851	None	0.168409014	356
CHOL	FASLG	DNADamage	0.850303	None	0.10618368	356
CHOL	FASLG	EMT	0.845851	None	0.334827384	356
CHOL	FASLG	Hormone AR	0.849659	None	0.121057415	356
CHOL	FASLG	Hormone ER	0.844426	None	0.340661204	356
CHOL	FASLG	PI3KAKT	0.844426	None	0.505821598	356
CHOL	FASLG	RASMAPK	0.675656	None	0.727667948	356
CHOL	FASLG	RTK	0.675656	None	0.556600699	356
CHOL	FASLG	TSCmTOR	0.845851	None	0.292643453	356
CHOL	MLKL	Apoptosis	0.815863	None	-0.586183934	197259
CHOL	MLKL	CellCycle	0.930663	None	-0.042964107	197259
CHOL	MLKL	DNADamage	0.815863	None	0.798405717	197259
CHOL	MLKL	EMT	0.930663	None	-0.075741677	197259
CHOL	MLKL	Hormone AR	0.930663	None	0.091804172	197259
CHOL	MLKL	Hormone ER	0.930663	None	-0.027942251	197259
CHOL	MLKL	PI3KAKT	0.930663	None	0.155223338	197259
CHOL	MLKL	RASMAPK	0.930663	None	0.36203924	197259
CHOL	MLKL	RTK	0.930663	None	0.295474989	197259
CHOL	MLKL	TSCmTOR	0.930663	None	0.275119251	197259
CHOL	RIPK1	Apoptosis	0.871397	None	0.057907383	8737
CHOL	RIPK1	CellCycle	0.871397	None	0.067951012	8737
CHOL	RIPK1	DNADamage	0.665963	None	-0.360868828	8737
CHOL	RIPK1	EMT	0.453213	None	0.927458999	8737
CHOL	RIPK1	Hormone AR	0.341721	None	0.669943751	8737
CHOL	RIPK1	Hormone ER	0.328953	None	0.649636309	8737
CHOL	RIPK1	PI3KAKT	0.453213	None	0.650451876	8737
CHOL	RIPK1	RASMAPK	0.341721	None	0.793720792	8737
CHOL	RIPK1	RTK	0.503216	None	0.32387374	8737
CHOL	RIPK1	TSCmTOR	0.503216	None	0.477373117	8737
CHOL	RIPK3	Apoptosis	0.6839	None	0.511286199	11035
CHOL	RIPK3	CellCycle	0.996112	None	-0.044415506	11035
CHOL	RIPK3	DNADamage	0.6839	None	-0.573904486	11035
CHOL	RIPK3	EMT	0.868988	None	0.495209991	11035
CHOL	RIPK3	Hormone AR	0.6839	None	-0.381765522	11035
CHOL	RIPK3	Hormone ER	0.996112	None	0.001488295	11035
CHOL	RIPK3	PI3KAKT	0.912681	None	0.247886244	11035
CHOL	RIPK3	RASMAPK	0.434724	None	0.971243401	11035
CHOL	RIPK3	RTK	0.6839	None	0.376844477	11035
CHOL	RIPK3	TSCmTOR	0.996112	None	-0.052489121	11035
CHOL	TLR3	Apoptosis	0.925413	None	-0.095415188	7098
CHOL	TLR3	CellCycle	0.914283	None	-0.192159867	7098
CHOL	TLR3	DNADamage	0.623124	None	0.712928534	7098
CHOL	TLR3	EMT	0.623124	None	-0.839574059	7098
CHOL	TLR3	Hormone AR	0.987323	None	0.006490109	7098
CHOL	TLR3	Hormone ER	0.925413	None	-0.065009551	7098
CHOL	TLR3	PI3KAKT	0.925413	None	0.221870855	7098
CHOL	TLR3	RASMAPK	0.501789	None	0.78124545	7098
CHOL	TLR3	RTK	0.501789	None	0.558112137	7098
CHOL	TLR3	TSCmTOR	0.914283	None	-0.333446383	7098
CHOL	TNF	Apoptosis	0.964491	None	0.036116967	7124
CHOL	TNF	CellCycle	0.964491	None	-0.386396862	7124
CHOL	TNF	DNADamage	0.964491	None	-0.17607477	7124
CHOL	TNF	EMT	0.964491	None	-0.629213655	7124
CHOL	TNF	Hormone AR	0.964491	None	-0.24268373	7124
CHOL	TNF	Hormone ER	0.964491	None	0.072279358	7124
CHOL	TNF	PI3KAKT	0.964491	None	0.024771648	7124
CHOL	TNF	RASMAPK	0.964491	None	0.250213063	7124
CHOL	TNF	RTK	0.964491	None	-0.043238643	7124
CHOL	TNF	TSCmTOR	0.964491	None	0.253148147	7124
COAD	FADD	Apoptosis	0.628743	None	0.202298956	8772
COAD	FADD	CellCycle	0.209758	None	0.353644916	8772
COAD	FADD	DNADamage	0.711326	None	-0.075111193	8772
COAD	FADD	EMT	0.836167	None	-0.08030655	8772
COAD	FADD	Hormone AR	0.711326	None	-0.074091269	8772
COAD	FADD	Hormone ER	0.546802	None	0.09957219	8772
COAD	FADD	PI3KAKT	0.0340836	Activation	0.772034747	8772
COAD	FADD	RASMAPK	0.0320375	Activation	0.948785189	8772
COAD	FADD	RTK	0.0424885	Activation	0.445285368	8772
COAD	FADD	TSCmTOR	0.0340836	Activation	0.514316952	8772
COAD	FAS	Apoptosis	0.140174	None	0.525513843	355
COAD	FAS	CellCycle	0.996797	None	0.000873112	355
COAD	FAS	DNADamage	0.0032914	Inhibition	-0.566906362	355
COAD	FAS	EMT	0.432706	None	-0.436206666	355
COAD	FAS	Hormone AR	0.996797	None	-0.015243744	355
COAD	FAS	Hormone ER	0.432706	None	-0.118444771	355
COAD	FAS	PI3KAKT	0.741296	None	0.162008791	355
COAD	FAS	RASMAPK	0.140174	None	0.678766844	355
COAD	FAS	RTK	0.203693	None	0.324567333	355
COAD	FAS	TSCmTOR	0.702383	None	0.132643638	355
COAD	FASLG	Apoptosis	0.00577988	Activation	0.882130467	356
COAD	FASLG	CellCycle	0.262601	None	0.257462345	356
COAD	FASLG	DNADamage	0.234785	None	-0.210072942	356
COAD	FASLG	EMT	0.200292	None	0.66680509	356
COAD	FASLG	Hormone AR	0.854451	None	-0.025690481	356
COAD	FASLG	Hormone ER	0.219991	None	0.143718385	356
COAD	FASLG	PI3KAKT	0.200292	None	0.476654122	356
COAD	FASLG	RASMAPK	0.0130874	Activation	0.968509309	356
COAD	FASLG	RTK	0.0165662	Activation	0.520490869	356
COAD	FASLG	TSCmTOR	0.200292	None	0.299288203	356
COAD	MLKL	Apoptosis	0.165523	None	0.621207395	197259
COAD	MLKL	CellCycle	0.835692	None	0.125689165	197259
COAD	MLKL	DNADamage	0.311504	None	-0.283574503	197259
COAD	MLKL	EMT	0.835692	None	-0.211893144	197259
COAD	MLKL	Hormone AR	0.980477	None	-0.024330799	197259
COAD	MLKL	Hormone ER	0.822977	None	0.082779058	197259
COAD	MLKL	PI3KAKT	0.980477	None	-0.044634055	197259
COAD	MLKL	RASMAPK	0.329858	None	0.486557394	197259
COAD	MLKL	RTK	0.311504	None	0.311710951	197259
COAD	MLKL	TSCmTOR	0.994457	None	-0.001334367	197259
COAD	RIPK1	Apoptosis	0.931776	None	0.084265319	8737
COAD	RIPK1	CellCycle	0.481196	None	-0.208057677	8737
COAD	RIPK1	DNADamage	0.180723	None	-0.270229804	8737
COAD	RIPK1	EMT	0.933418	None	-0.032399712	8737
COAD	RIPK1	Hormone AR	0.481196	None	0.139054491	8737
COAD	RIPK1	Hormone ER	0.933418	None	0.008500186	8737
COAD	RIPK1	PI3KAKT	0.0204629	Activation	0.824999641	8737
COAD	RIPK1	RASMAPK	0.0204629	Activation	0.90130479	8737
COAD	RIPK1	RTK	0.0398322	Activation	0.447703823	8737
COAD	RIPK1	TSCmTOR	0.00526988	Activation	0.661422988	8737
COAD	RIPK3	Apoptosis	0.887905	None	0.066596507	11035
COAD	RIPK3	CellCycle	0.25926	None	-0.329335323	11035
COAD	RIPK3	DNADamage	0.117165	None	-0.360761556	11035
COAD	RIPK3	EMT	0.060949	None	-1.054903686	11035
COAD	RIPK3	Hormone AR	0.887905	None	-0.040613903	11035
COAD	RIPK3	Hormone ER	0.974549	None	-0.00320129	11035
COAD	RIPK3	PI3KAKT	0.887905	None	-0.12679678	11035
COAD	RIPK3	RASMAPK	0.887905	None	0.144791766	11035
COAD	RIPK3	RTK	0.238079	None	0.330521727	11035
COAD	RIPK3	TSCmTOR	0.238079	None	-0.320290159	11035
COAD	TLR3	Apoptosis	0.876859	None	-0.110680251	7098
COAD	TLR3	CellCycle	0.0453884	Inhibition	-0.613270748	7098
COAD	TLR3	DNADamage	0.304317	None	-0.247051366	7098
COAD	TLR3	EMT	0.876859	None	0.148307945	7098
COAD	TLR3	Hormone AR	0.689057	None	0.132414031	7098
COAD	TLR3	Hormone ER	0.876859	None	-0.049589943	7098
COAD	TLR3	PI3KAKT	0.885974	None	0.043470227	7098
COAD	TLR3	RASMAPK	0.288918	None	0.554306525	7098
COAD	TLR3	RTK	0.137718	None	0.409435831	7098
COAD	TLR3	TSCmTOR	0.885974	None	-0.041131194	7098
COAD	TNF	Apoptosis	0.704217	None	-0.098747846	7124
COAD	TNF	CellCycle	0.378092	None	-0.224612435	7124
COAD	TNF	DNADamage	0.0603291	None	-0.345671805	7124
COAD	TNF	EMT	0.179	None	0.623356764	7124
COAD	TNF	Hormone AR	0.257581	None	-0.18704458	7124
COAD	TNF	Hormone ER	0.704217	None	-0.044637168	7124
COAD	TNF	PI3KAKT	0.0541422	None	0.690863081	7124
COAD	TNF	RASMAPK	0.0127519	Activation	0.971399952	7124
COAD	TNF	RTK	0.0127519	Activation	0.557618002	7124
COAD	TNF	TSCmTOR	0.0412098	Activation	0.478542789	7124
DLBC	FADD	Apoptosis	0.956525	None	0.139701533	8772
DLBC	FADD	CellCycle	0.956525	None	0.435847571	8772
DLBC	FADD	DNADamage	0.956525	None	-0.610689622	8772
DLBC	FADD	EMT	0.956525	None	0.299394014	8772
DLBC	FADD	Hormone AR	0.956525	None	-0.639724929	8772
DLBC	FADD	Hormone ER	0.956525	None	0.083988325	8772
DLBC	FADD	PI3KAKT	0.968919	None	-0.121567606	8772
DLBC	FADD	RASMAPK	0.968919	None	-0.019490082	8772
DLBC	FADD	RTK	0.956525	None	-0.391371351	8772
DLBC	FADD	TSCmTOR	0.956525	None	0.148427998	8772
DLBC	FAS	Apoptosis	0.550076	None	0.52474826	355
DLBC	FAS	CellCycle	0.367934	None	-0.641891838	355
DLBC	FAS	DNADamage	0.367934	None	-1.12281336	355
DLBC	FAS	EMT	0.367934	None	-0.627474436	355
DLBC	FAS	Hormone AR	0.65848	None	-0.331024945	355
DLBC	FAS	Hormone ER	0.367934	None	0.281915983	355
DLBC	FAS	PI3KAKT	0.978659	None	-0.020391025	355
DLBC	FAS	RASMAPK	0.842054	None	-0.209964538	355
DLBC	FAS	RTK	0.65848	None	0.381241698	355
DLBC	FAS	TSCmTOR	0.863464	None	0.119723348	355
DLBC	FASLG	Apoptosis	0.180116	None	0.648284464	356
DLBC	FASLG	CellCycle	0.0506951	None	-1.052056951	356
DLBC	FASLG	DNADamage	0.0506951	None	-1.324126129	356
DLBC	FASLG	EMT	0.0652967	None	-0.857505541	356
DLBC	FASLG	Hormone AR	0.110582	None	-0.762073353	356
DLBC	FASLG	Hormone ER	0.0599953	None	0.42789894	356
DLBC	FASLG	PI3KAKT	0.189746	None	0.984205493	356
DLBC	FASLG	RASMAPK	0.0925293	None	0.910029941	356
DLBC	FASLG	RTK	0.0925293	None	0.926296943	356
DLBC	FASLG	TSCmTOR	0.023597	Activation	1.165587727	356
DLBC	MLKL	Apoptosis	0.0503359	None	1.179066343	197259
DLBC	MLKL	CellCycle	0.943335	None	-0.031703639	197259
DLBC	MLKL	DNADamage	0.0503359	None	-1.454912634	197259
DLBC	MLKL	EMT	0.817771	None	0.152181791	197259
DLBC	MLKL	Hormone AR	0.594596	None	-0.593540653	197259
DLBC	MLKL	Hormone ER	0.817771	None	0.085445863	197259
DLBC	MLKL	PI3KAKT	0.817771	None	-0.60838077	197259
DLBC	MLKL	RASMAPK	0.817771	None	-0.321731643	197259
DLBC	MLKL	RTK	0.817771	None	-0.335833861	197259
DLBC	MLKL	TSCmTOR	0.817771	None	0.14211352	197259
DLBC	RIPK1	Apoptosis	0.894561	None	-0.062200268	8737
DLBC	RIPK1	CellCycle	0.12551	None	-0.741342139	8737
DLBC	RIPK1	DNADamage	0.121397	None	-1.10698813	8737
DLBC	RIPK1	EMT	0.220869	None	-0.55652482	8737
DLBC	RIPK1	Hormone AR	0.125951	None	-0.729462027	8737
DLBC	RIPK1	Hormone ER	0.123085	None	0.355118201	8737
DLBC	RIPK1	PI3KAKT	0.0028371	Activation	2.299776022	8737
DLBC	RIPK1	RASMAPK	0.000567855	Activation	1.724073954	8737
DLBC	RIPK1	RTK	0.000705487	Activation	1.714735568	8737
DLBC	RIPK1	TSCmTOR	7.07545e-06	Activation	1.685442308	8737
DLBC	RIPK3	Apoptosis	0.847336	None	0.155756981	11035
DLBC	RIPK3	CellCycle	0.849969	None	-0.088833406	11035
DLBC	RIPK3	DNADamage	0.469021	None	-0.686083499	11035
DLBC	RIPK3	EMT	0.640125	None	-0.277798893	11035
DLBC	RIPK3	Hormone AR	0.640125	None	-0.339264551	11035
DLBC	RIPK3	Hormone ER	0.019975	Activation	0.590629179	11035
DLBC	RIPK3	PI3KAKT	0.640125	None	0.627314915	11035
DLBC	RIPK3	RASMAPK	0.469021	None	0.71809307	11035
DLBC	RIPK3	RTK	0.469021	None	0.688696617	11035
DLBC	RIPK3	TSCmTOR	0.219962	None	0.831018247	11035
DLBC	TLR3	Apoptosis	0.220807	None	0.940066741	7098
DLBC	TLR3	CellCycle	0.99951	None	0.026553371	7098
DLBC	TLR3	DNADamage	0.765831	None	-0.592418077	7098
DLBC	TLR3	EMT	0.99951	None	0.272545645	7098
DLBC	TLR3	Hormone AR	0.220807	None	-0.877895182	7098
DLBC	TLR3	Hormone ER	0.765831	None	-0.23740746	7098
DLBC	TLR3	PI3KAKT	0.99951	None	-0.000467905	7098
DLBC	TLR3	RASMAPK	0.99951	None	-0.016431049	7098
DLBC	TLR3	RTK	0.99951	None	0.188347388	7098
DLBC	TLR3	TSCmTOR	0.99951	None	-0.088864763	7098
DLBC	TNF	Apoptosis	0.45537	None	0.442071095	7124
DLBC	TNF	CellCycle	0.574313	None	-0.251005617	7124
DLBC	TNF	DNADamage	0.117846	None	-1.185887924	7124
DLBC	TNF	EMT	0.513548	None	-0.307617547	7124
DLBC	TNF	Hormone AR	0.414465	None	-0.494513703	7124
DLBC	TNF	Hormone ER	0.0636007	None	0.471223876	7124
DLBC	TNF	PI3KAKT	0.242723	None	1.10663301	7124
DLBC	TNF	RASMAPK	0.142995	None	0.92198796	7124
DLBC	TNF	RTK	0.146628	None	0.89423029	7124
DLBC	TNF	TSCmTOR	0.0244415	Activation	1.194698516	7124
ESCA	FADD	Apoptosis	0.688096	None	0.143206832	8772
ESCA	FADD	CellCycle	0.568546	None	0.424432423	8772
ESCA	FADD	DNADamage	0.688096	None	0.188908327	8772
ESCA	FADD	EMT	0.679357	None	0.73251366	8772
ESCA	FADD	Hormone AR	0.688096	None	-0.219488256	8772
ESCA	FADD	Hormone ER	0.688096	None	0.088956861	8772
ESCA	FADD	PI3KAKT	0.688096	None	0.195690405	8772
ESCA	FADD	RASMAPK	0.688096	None	0.27812836	8772
ESCA	FADD	RTK	0.74708	None	-0.15713534	8772
ESCA	FADD	TSCmTOR	0.78108	None	0.066652524	8772
ESCA	FAS	Apoptosis	0.877286	None	0.214071139	355
ESCA	FAS	CellCycle	0.923871	None	-0.021318515	355
ESCA	FAS	DNADamage	0.923871	None	0.079409449	355
ESCA	FAS	EMT	0.216836	None	0.947740484	355
ESCA	FAS	Hormone AR	0.216836	None	-0.495757261	355
ESCA	FAS	Hormone ER	0.923871	None	0.036674204	355
ESCA	FAS	PI3KAKT	0.923871	None	0.044225409	355
ESCA	FAS	RASMAPK	0.923871	None	0.150017765	355
ESCA	FAS	RTK	0.216836	None	-0.726015405	355
ESCA	FAS	TSCmTOR	0.923871	None	0.043887518	355
ESCA	FASLG	Apoptosis	0.081379	None	0.608821563	356
ESCA	FASLG	CellCycle	0.58488	None	0.252319905	356
ESCA	FASLG	DNADamage	0.9429	None	-0.023169745	356
ESCA	FASLG	EMT	0.789998	None	-0.180804723	356
ESCA	FASLG	Hormone AR	0.58488	None	0.283145077	356
ESCA	FASLG	Hormone ER	0.081379	None	0.289497597	356
ESCA	FASLG	PI3KAKT	0.711816	None	0.159787045	356
ESCA	FASLG	RASMAPK	0.711816	None	0.169086646	356
ESCA	FASLG	RTK	0.711816	None	-0.225304276	356
ESCA	FASLG	TSCmTOR	0.311137	None	0.388553269	356
ESCA	MLKL	Apoptosis	0.0556092	None	0.51575182	197259
ESCA	MLKL	CellCycle	0.893168	None	-0.065416742	197259
ESCA	MLKL	DNADamage	0.858858	None	0.166823792	197259
ESCA	MLKL	EMT	0.0556092	None	-1.057465186	197259
ESCA	MLKL	Hormone AR	0.128733	None	0.473025603	197259
ESCA	MLKL	Hormone ER	0.893168	None	0.016108499	197259
ESCA	MLKL	PI3KAKT	0.893168	None	0.051841446	197259
ESCA	MLKL	RASMAPK	0.0474372	Activation	0.621751385	197259
ESCA	MLKL	RTK	0.0474372	Activation	0.998694992	197259
ESCA	MLKL	TSCmTOR	0.0474372	Activation	0.570294679	197259
ESCA	RIPK1	Apoptosis	0.708325	None	0.109502783	8737
ESCA	RIPK1	CellCycle	0.488095	None	-0.199757084	8737
ESCA	RIPK1	DNADamage	0.837294	None	-0.067069105	8737
ESCA	RIPK1	EMT	0.488095	None	-0.413563842	8737
ESCA	RIPK1	Hormone AR	0.488095	None	0.329810569	8737
ESCA	RIPK1	Hormone ER	0.488095	None	0.108795674	8737
ESCA	RIPK1	PI3KAKT	0.18017	None	0.592191113	8737
ESCA	RIPK1	RASMAPK	0.18017	None	0.478964685	8737
ESCA	RIPK1	RTK	0.488095	None	0.399189139	8737
ESCA	RIPK1	TSCmTOR	0.168042	None	0.552684913	8737
ESCA	RIPK3	Apoptosis	0.846293	None	0.045028387	11035
ESCA	RIPK3	CellCycle	0.0331767	Inhibition	-0.532624562	11035
ESCA	RIPK3	DNADamage	0.464816	None	0.284521837	11035
ESCA	RIPK3	EMT	0.00534611	Inhibition	-1.516842354	11035
ESCA	RIPK3	Hormone AR	2.9543e-05	Activation	1.234683506	11035
ESCA	RIPK3	Hormone ER	0.215279	None	-0.175266786	11035
ESCA	RIPK3	PI3KAKT	0.837867	None	-0.087312328	11035
ESCA	RIPK3	RASMAPK	0.131435	None	0.434815728	11035
ESCA	RIPK3	RTK	2.9543e-05	Activation	1.650931582	11035
ESCA	RIPK3	TSCmTOR	0.00797318	Activation	0.675637892	11035
ESCA	TLR3	Apoptosis	0.92176	None	-0.022638052	7098
ESCA	TLR3	CellCycle	0.658252	None	-0.223117082	7098
ESCA	TLR3	DNADamage	0.658252	None	-0.471919458	7098
ESCA	TLR3	EMT	0.658252	None	-0.527614393	7098
ESCA	TLR3	Hormone AR	0.886328	None	-0.068740767	7098
ESCA	TLR3	Hormone ER	0.658252	None	-0.121980264	7098
ESCA	TLR3	PI3KAKT	0.795692	None	-0.1637035	7098
ESCA	TLR3	RASMAPK	0.886328	None	0.07748442	7098
ESCA	TLR3	RTK	0.689596	None	0.304750451	7098
ESCA	TLR3	TSCmTOR	0.658252	None	0.228869543	7098
ESCA	TNF	Apoptosis	0.363683	None	0.30269573	7124
ESCA	TNF	CellCycle	0.763312	None	-0.069668339	7124
ESCA	TNF	DNADamage	0.128868	None	-0.738097964	7124
ESCA	TNF	EMT	0.0788739	None	1.301236613	7124
ESCA	TNF	Hormone AR	0.200705	None	-0.477296468	7124
ESCA	TNF	Hormone ER	0.363683	None	0.150323153	7124
ESCA	TNF	PI3KAKT	0.363683	None	0.320433895	7124
ESCA	TNF	RASMAPK	0.200705	None	0.480826897	7124
ESCA	TNF	RTK	0.588401	None	-0.232062712	7124
ESCA	TNF	TSCmTOR	0.579151	None	0.167740874	7124
GBM	FADD	Apoptosis	0.388821	None	0.555044486	8772
GBM	FADD	CellCycle	0.5485	None	0.410693906	8772
GBM	FADD	DNADamage	0.774894	None	-0.124565316	8772
GBM	FADD	EMT	0.675709	None	0.166708165	8772
GBM	FADD	Hormone AR	0.388821	None	-0.26008586	8772
GBM	FADD	Hormone ER	0.50306	None	-0.251989493	8772
GBM	FADD	PI3KAKT	0.774894	None	0.328457568	8772
GBM	FADD	RASMAPK	0.388821	None	0.872549665	8772
GBM	FADD	RTK	0.946393	None	-0.032478327	8772
GBM	FADD	TSCmTOR	0.946393	None	-0.067246926	8772
GBM	FAS	Apoptosis	0.881361	None	-0.101718664	355
GBM	FAS	CellCycle	0.123516	None	-0.771945536	355
GBM	FAS	DNADamage	0.680484	None	-0.221896513	355
GBM	FAS	EMT	0.0286431	Activation	0.560008214	355
GBM	FAS	Hormone AR	0.680484	None	0.150956761	355
GBM	FAS	Hormone ER	0.881361	None	-0.048969446	355
GBM	FAS	PI3KAKT	0.695508	None	-0.395931444	355
GBM	FAS	RASMAPK	0.0286431	Activation	1.521539536	355
GBM	FAS	RTK	0.680484	None	-0.417845578	355
GBM	FAS	TSCmTOR	0.881361	None	-0.06907414	355
GBM	FASLG	Apoptosis	0.750184	None	0.368662152	356
GBM	FASLG	CellCycle	0.750184	None	-0.389908675	356
GBM	FASLG	DNADamage	0.750184	None	-0.2429099	356
GBM	FASLG	EMT	0.97569	None	0.108941003	356
GBM	FASLG	Hormone AR	0.977294	None	0.031445834	356
GBM	FASLG	Hormone ER	0.977294	None	-0.009590076	356
GBM	FASLG	PI3KAKT	0.750184	None	-0.706747374	356
GBM	FASLG	RASMAPK	0.977294	None	0.157946505	356
GBM	FASLG	RTK	0.977294	None	-0.013337344	356
GBM	FASLG	TSCmTOR	0.750184	None	-0.408283214	356
GBM	MLKL	Apoptosis	0.840624	None	0.261843379	197259
GBM	MLKL	CellCycle	0.840624	None	-0.474651246	197259
GBM	MLKL	DNADamage	0.840624	None	-0.347078182	197259
GBM	MLKL	EMT	0.840624	None	0.107566305	197259
GBM	MLKL	Hormone AR	0.898464	None	0.021711216	197259
GBM	MLKL	Hormone ER	0.84565	None	-0.082460509	197259
GBM	MLKL	PI3KAKT	0.885011	None	-0.142817111	197259
GBM	MLKL	RASMAPK	0.840624	None	0.326675274	197259
GBM	MLKL	RTK	0.840624	None	-0.443368869	197259
GBM	MLKL	TSCmTOR	0.840624	None	-0.26634213	197259
GBM	RIPK1	Apoptosis	0.640376	None	0.163544734	8737
GBM	RIPK1	CellCycle	0.659049	None	0.165044075	8737
GBM	RIPK1	DNADamage	0.382464	None	-0.442040884	8737
GBM	RIPK1	EMT	0.382464	None	0.350019142	8737
GBM	RIPK1	Hormone AR	0.382464	None	0.236632277	8737
GBM	RIPK1	Hormone ER	0.382464	None	-0.256915011	8737
GBM	RIPK1	PI3KAKT	0.49705	None	0.558711609	8737
GBM	RIPK1	RASMAPK	0.382464	None	0.719158257	8737
GBM	RIPK1	RTK	0.49705	None	0.44059504	8737
GBM	RIPK1	TSCmTOR	0.626055	None	0.309777178	8737
GBM	RIPK3	Apoptosis	0.928794	None	0.052916628	11035
GBM	RIPK3	CellCycle	0.0949489	None	-0.832414436	11035
GBM	RIPK3	DNADamage	0.0499194	Inhibition	-0.684258	11035
GBM	RIPK3	EMT	0.928794	None	-0.078957485	11035
GBM	RIPK3	Hormone AR	0.0949489	None	-0.366345006	11035
GBM	RIPK3	Hormone ER	0.708017	None	0.15697736	11035
GBM	RIPK3	PI3KAKT	0.928794	None	-0.049025327	11035
GBM	RIPK3	RASMAPK	0.159691	None	0.955430097	11035
GBM	RIPK3	RTK	0.928794	None	-0.081538226	11035
GBM	RIPK3	TSCmTOR	0.708017	None	0.380348028	11035
GBM	TLR3	Apoptosis	0.185191	None	-0.557674594	7098
GBM	TLR3	CellCycle	0.00160646	Inhibition	-1.354996041	7098
GBM	TLR3	DNADamage	0.185191	None	-0.452040414	7098
GBM	TLR3	EMT	0.732777	None	0.074322596	7098
GBM	TLR3	Hormone AR	0.293552	None	0.245279425	7098
GBM	TLR3	Hormone ER	0.732777	None	0.090252557	7098
GBM	TLR3	PI3KAKT	0.616771	None	0.437576413	7098
GBM	TLR3	RASMAPK	0.00173675	Activation	1.775475947	7098
GBM	TLR3	RTK	0.732777	None	0.160732369	7098
GBM	TLR3	TSCmTOR	0.54546	None	0.452739006	7098
GBM	TNF	Apoptosis	0.401728	None	-0.373654337	7124
GBM	TNF	CellCycle	0.0602347	None	-0.832426828	7124
GBM	TNF	DNADamage	0.0335945	Inhibition	-0.670862304	7124
GBM	TNF	EMT	0.707471	None	0.136152636	7124
GBM	TNF	Hormone AR	0.834721	None	0.042376862	7124
GBM	TNF	Hormone ER	0.834721	None	0.082403362	7124
GBM	TNF	PI3KAKT	0.707471	None	0.427288444	7124
GBM	TNF	RASMAPK	0.00191766	Activation	1.848069975	7124
GBM	TNF	RTK	0.834721	None	-0.098627867	7124
GBM	TNF	TSCmTOR	0.0335945	Activation	1.162930606	7124
HNSC	FADD	Apoptosis	0.430241	None	0.221229292	8772
HNSC	FADD	CellCycle	0.755538	None	0.083370016	8772
HNSC	FADD	DNADamage	0.00162479	Inhibition	-0.635473106	8772
HNSC	FADD	EMT	0.00162479	Activation	1.09617368	8772
HNSC	FADD	Hormone AR	0.039598	Inhibition	-0.394283569	8772
HNSC	FADD	Hormone ER	0.968612	None	-0.002839631	8772
HNSC	FADD	PI3KAKT	0.422552	None	-0.359257183	8772
HNSC	FADD	RASMAPK	0.890696	None	-0.04387208	8772
HNSC	FADD	RTK	0.60145	None	0.200942053	8772
HNSC	FADD	TSCmTOR	0.248911	None	0.31291101	8772
HNSC	FAS	Apoptosis	0.029247	Activation	0.536429667	355
HNSC	FAS	CellCycle	0.901151	None	0.032110928	355
HNSC	FAS	DNADamage	0.901151	None	0.02139173	355
HNSC	FAS	EMT	0.00415087	Activation	1.075768287	355
HNSC	FAS	Hormone AR	0.302663	None	0.205354607	355
HNSC	FAS	Hormone ER	0.227098	None	0.114106208	355
HNSC	FAS	PI3KAKT	0.0664762	None	-0.636798845	355
HNSC	FAS	RASMAPK	0.302663	None	-0.218227589	355
HNSC	FAS	RTK	0.0323353	Inhibition	-0.646459824	355
HNSC	FAS	TSCmTOR	0.540262	None	-0.149279464	355
HNSC	FASLG	Apoptosis	3.35158e-10	Activation	1.258373551	356
HNSC	FASLG	CellCycle	0.800298	None	-0.041684913	356
HNSC	FASLG	DNADamage	0.564237	None	0.12947458	356
HNSC	FASLG	EMT	0.800298	None	0.077854992	356
HNSC	FASLG	Hormone AR	0.111924	None	0.333108329	356
HNSC	FASLG	Hormone ER	0.0403936	Activation	0.190189	356
HNSC	FASLG	PI3KAKT	0.564237	None	-0.236128802	356
HNSC	FASLG	RASMAPK	0.564237	None	-0.140665108	356
HNSC	FASLG	RTK	0.136044	None	-0.479290261	356
HNSC	FASLG	TSCmTOR	0.564237	None	0.189577524	356
HNSC	MLKL	Apoptosis	2.28128e-07	Activation	1.070731048	197259
HNSC	MLKL	CellCycle	0.814314	None	-0.047892139	197259
HNSC	MLKL	DNADamage	0.222749	None	-0.244939712	197259
HNSC	MLKL	EMT	0.00516173	Activation	1.003287153	197259
HNSC	MLKL	Hormone AR	0.814314	None	-0.036713279	197259
HNSC	MLKL	Hormone ER	0.159474	None	0.134464739	197259
HNSC	MLKL	PI3KAKT	0.08423	None	-0.641390389	197259
HNSC	MLKL	RASMAPK	0.222749	None	0.24767615	197259
HNSC	MLKL	RTK	0.222749	None	-0.357864269	197259
HNSC	MLKL	TSCmTOR	0.253885	None	0.241528852	197259
HNSC	RIPK1	Apoptosis	0.15231	None	0.329997631	8737
HNSC	RIPK1	CellCycle	0.775642	None	0.06235787	8737
HNSC	RIPK1	DNADamage	0.0131323	Inhibition	-0.491930856	8737
HNSC	RIPK1	EMT	0.677454	None	-0.18777216	8737
HNSC	RIPK1	Hormone AR	0.163144	None	-0.248046701	8737
HNSC	RIPK1	Hormone ER	0.877382	None	-0.011171471	8737
HNSC	RIPK1	PI3KAKT	0.0627628	None	0.643995587	8737
HNSC	RIPK1	RASMAPK	0.00504024	Activation	0.569829554	8737
HNSC	RIPK1	RTK	0.10968	None	0.47792641	8737
HNSC	RIPK1	TSCmTOR	0.000167203	Activation	0.808814771	8737
HNSC	RIPK3	Apoptosis	0.691875	None	-0.082717577	11035
HNSC	RIPK3	CellCycle	0.206606	None	-0.261147413	11035
HNSC	RIPK3	DNADamage	0.618039	None	0.134635802	11035
HNSC	RIPK3	EMT	0.691875	None	-0.171854898	11035
HNSC	RIPK3	Hormone AR	0.119684	None	0.310352148	11035
HNSC	RIPK3	Hormone ER	0.691875	None	0.028754528	11035
HNSC	RIPK3	PI3KAKT	0.119684	None	0.573021142	11035
HNSC	RIPK3	RASMAPK	0.119684	None	0.387870029	11035
HNSC	RIPK3	RTK	0.270139	None	0.349060821	11035
HNSC	RIPK3	TSCmTOR	0.119684	None	0.412196482	11035
HNSC	TLR3	Apoptosis	0.00735522	Activation	0.655458023	7098
HNSC	TLR3	CellCycle	0.965683	None	-0.014046746	7098
HNSC	TLR3	DNADamage	0.965683	None	-0.072909293	7098
HNSC	TLR3	EMT	0.965683	None	0.236541804	7098
HNSC	TLR3	Hormone AR	0.965683	None	-0.06056944	7098
HNSC	TLR3	Hormone ER	0.965683	None	0.013000628	7098
HNSC	TLR3	PI3KAKT	0.965683	None	0.055374809	7098
HNSC	TLR3	RASMAPK	0.965683	None	-0.007508849	7098
HNSC	TLR3	RTK	0.965683	None	0.143741731	7098
HNSC	TLR3	TSCmTOR	0.422082	None	0.327823388	7098
HNSC	TNF	Apoptosis	0.744221	None	0.108438633	7124
HNSC	TNF	CellCycle	0.387149	None	-0.228084307	7124
HNSC	TNF	DNADamage	0.494964	None	-0.19819542	7124
HNSC	TNF	EMT	0.188623	None	0.640709756	7124
HNSC	TNF	Hormone AR	0.713355	None	0.123813684	7124
HNSC	TNF	Hormone ER	0.786478	None	-0.019661202	7124
HNSC	TNF	PI3KAKT	0.744221	None	-0.151111248	7124
HNSC	TNF	RASMAPK	0.387149	None	0.247820121	7124
HNSC	TNF	RTK	0.771935	None	0.097766726	7124
HNSC	TNF	TSCmTOR	0.0296421	Activation	0.561490856	7124
KICH	FADD	Apoptosis	0.94626	None	-0.028755101	8772
KICH	FADD	CellCycle	0.94626	None	0.017386816	8772
KICH	FADD	DNADamage	0.125594	None	-0.86533834	8772
KICH	FADD	EMT	0.867694	None	-0.207160857	8772
KICH	FADD	Hormone AR	0.867694	None	0.065886543	8772
KICH	FADD	Hormone ER	0.867694	None	-0.086703255	8772
KICH	FADD	PI3KAKT	0.867694	None	-0.118146061	8772
KICH	FADD	RASMAPK	0.360335	None	-0.614937354	8772
KICH	FADD	RTK	0.125594	None	-0.823026415	8772
KICH	FADD	TSCmTOR	0.778458	None	-0.282600191	8772
KICH	FAS	Apoptosis	0.934627	None	0.016063639	355
KICH	FAS	CellCycle	0.674439	None	-0.159131259	355
KICH	FAS	DNADamage	0.0130061	Activation	1.203873859	355
KICH	FAS	EMT	0.864311	None	-0.114879608	355
KICH	FAS	Hormone AR	0.674439	None	-0.133403213	355
KICH	FAS	Hormone ER	0.674439	None	0.135989805	355
KICH	FAS	PI3KAKT	0.162325	None	0.522296226	355
KICH	FAS	RASMAPK	0.1058	None	0.852637502	355
KICH	FAS	RTK	0.1058	None	0.754228215	355
KICH	FAS	TSCmTOR	0.307191	None	0.404345041	355
KICH	FASLG	Apoptosis	0.828055	None	-0.108620753	356
KICH	FASLG	CellCycle	0.642135	None	-0.317133266	356
KICH	FASLG	DNADamage	0.642135	None	-0.450208718	356
KICH	FASLG	EMT	0.91601	None	-0.127275959	356
KICH	FASLG	Hormone AR	0.642135	None	-0.188138551	356
KICH	FASLG	Hormone ER	0.91601	None	-0.048049735	356
KICH	FASLG	PI3KAKT	0.642135	None	0.486883619	356
KICH	FASLG	RASMAPK	0.73623	None	0.311604483	356
KICH	FASLG	RTK	0.949297	None	0.022180805	356
KICH	FASLG	TSCmTOR	0.73623	None	-0.214334565	356
KICH	MLKL	Apoptosis	0.714389	None	-0.091199681	197259
KICH	MLKL	CellCycle	0.268689	None	-0.360650303	197259
KICH	MLKL	DNADamage	0.255738	None	0.651580406	197259
KICH	MLKL	EMT	0.99911	None	-0.000443279	197259
KICH	MLKL	Hormone AR	0.255738	None	-0.276000251	197259
KICH	MLKL	Hormone ER	0.327006	None	0.26136839	197259
KICH	MLKL	PI3KAKT	0.255738	None	0.461187248	197259
KICH	MLKL	RASMAPK	0.255738	None	0.630658987	197259
KICH	MLKL	RTK	0.257343	None	0.526092117	197259
KICH	MLKL	TSCmTOR	0.408749	None	0.274574604	197259
KICH	RIPK1	Apoptosis	0.350963	None	0.314938629	8737
KICH	RIPK1	CellCycle	0.714523	None	-0.094564193	8737
KICH	RIPK1	DNADamage	0.565517	None	-0.373749335	8737
KICH	RIPK1	EMT	0.539479	None	0.480074874	8737
KICH	RIPK1	Hormone AR	0.0158601	Inhibition	-0.508730839	8737
KICH	RIPK1	Hormone ER	0.350963	None	0.363028709	8737
KICH	RIPK1	PI3KAKT	0.554278	None	0.301668801	8737
KICH	RIPK1	RASMAPK	0.714523	None	0.189796689	8737
KICH	RIPK1	RTK	0.714523	None	0.131859572	8737
KICH	RIPK1	TSCmTOR	0.714523	None	0.154979016	8737
KICH	RIPK3	Apoptosis	0.535998	None	-0.284983471	11035
KICH	RIPK3	CellCycle	0.182648	None	-0.596492236	11035
KICH	RIPK3	DNADamage	0.629124	None	0.2250192	11035
KICH	RIPK3	EMT	0.535998	None	-0.432921249	11035
KICH	RIPK3	Hormone AR	0.535998	None	-0.190077812	11035
KICH	RIPK3	Hormone ER	0.613244	None	-0.160611116	11035
KICH	RIPK3	PI3KAKT	0.613244	None	0.19403442	11035
KICH	RIPK3	RASMAPK	0.587875	None	0.357957643	11035
KICH	RIPK3	RTK	0.535998	None	0.428727921	11035
KICH	RIPK3	TSCmTOR	0.775682	None	0.079843054	11035
KICH	TLR3	Apoptosis	0.0743596	None	-0.418884788	7098
KICH	TLR3	CellCycle	0.0210401	Inhibition	-0.685430839	7098
KICH	TLR3	DNADamage	0.347357	None	0.424180209	7098
KICH	TLR3	EMT	0.0804537	None	-0.761064961	7098
KICH	TLR3	Hormone AR	0.508717	None	-0.110093205	7098
KICH	TLR3	Hormone ER	0.367398	None	0.212853138	7098
KICH	TLR3	PI3KAKT	0.0804537	None	0.559956227	7098
KICH	TLR3	RASMAPK	0.00728656	Activation	1.187808088	7098
KICH	TLR3	RTK	0.00457691	Activation	1.16340144	7098
KICH	TLR3	TSCmTOR	0.152863	None	0.449367074	7098
KICH	TNF	Apoptosis	0.329504	None	-0.234561964	7124
KICH	TNF	CellCycle	0.754691	None	-0.080168724	7124
KICH	TNF	DNADamage	0.329504	None	0.480511974	7124
KICH	TNF	EMT	0.380945	None	0.398582281	7124
KICH	TNF	Hormone AR	0.265759	None	-0.267046684	7124
KICH	TNF	Hormone ER	0.754691	None	-0.078346464	7124
KICH	TNF	PI3KAKT	0.0281403	Activation	0.716547622	7124
KICH	TNF	RASMAPK	0.0281403	Activation	1.029364831	7124
KICH	TNF	RTK	0.270493	None	0.513997804	7124
KICH	TNF	TSCmTOR	0.00471265	Activation	0.9377058	7124
KIRC	FADD	Apoptosis	0.692758	None	-0.063592206	8772
KIRC	FADD	CellCycle	0.605698	None	0.182039112	8772
KIRC	FADD	DNADamage	0.605698	None	-0.112184504	8772
KIRC	FADD	EMT	0.692758	None	0.077444422	8772
KIRC	FADD	Hormone AR	0.692758	None	-0.051944335	8772
KIRC	FADD	Hormone ER	0.605698	None	-0.124671151	8772
KIRC	FADD	PI3KAKT	0.820665	None	0.038805004	8772
KIRC	FADD	RASMAPK	0.820665	None	-0.046616384	8772
KIRC	FADD	RTK	0.00798283	Inhibition	-0.584781377	8772
KIRC	FADD	TSCmTOR	0.605698	None	0.150104045	8772
KIRC	FAS	Apoptosis	0.366353	None	0.148522646	355
KIRC	FAS	CellCycle	0.82261	None	0.026572302	355
KIRC	FAS	DNADamage	0.79941	None	0.035080123	355
KIRC	FAS	EMT	0.709011	None	-0.087403917	355
KIRC	FAS	Hormone AR	0.366353	None	-0.149060717	355
KIRC	FAS	Hormone ER	0.366353	None	-0.164814058	355
KIRC	FAS	PI3KAKT	0.366353	None	-0.241165772	355
KIRC	FAS	RASMAPK	0.709011	None	0.112565438	355
KIRC	FAS	RTK	0.51625	None	0.178517715	355
KIRC	FAS	TSCmTOR	0.366353	None	-0.193495496	355
KIRC	FASLG	Apoptosis	0.306735	None	0.190943699	356
KIRC	FASLG	CellCycle	0.855602	None	0.021539463	356
KIRC	FASLG	DNADamage	0.855602	None	-0.034024189	356
KIRC	FASLG	EMT	0.855602	None	0.081315849	356
KIRC	FASLG	Hormone AR	0.855602	None	-0.043847818	356
KIRC	FASLG	Hormone ER	0.855602	None	-0.071184373	356
KIRC	FASLG	PI3KAKT	0.855602	None	0.086799058	356
KIRC	FASLG	RASMAPK	0.855602	None	0.049374473	356
KIRC	FASLG	RTK	0.306735	None	-0.350159067	356
KIRC	FASLG	TSCmTOR	0.855602	None	-0.140572886	356
KIRC	MLKL	Apoptosis	0.06359	None	-0.255254	197259
KIRC	MLKL	CellCycle	0.588186	None	-0.085506353	197259
KIRC	MLKL	DNADamage	0.700108	None	0.037636782	197259
KIRC	MLKL	EMT	0.116856	None	0.275900858	197259
KIRC	MLKL	Hormone AR	0.0226608	Activation	0.239515321	197259
KIRC	MLKL	Hormone ER	0.415274	None	-0.126599967	197259
KIRC	MLKL	PI3KAKT	0.398277	None	-0.220857944	197259
KIRC	MLKL	RASMAPK	0.700108	None	0.08756859	197259
KIRC	MLKL	RTK	0.398277	None	0.245104317	197259
KIRC	MLKL	TSCmTOR	0.486676	None	-0.138642481	197259
KIRC	RIPK1	Apoptosis	0.357255	None	-0.109612044	8737
KIRC	RIPK1	CellCycle	0.0235366	Inhibition	-0.361683247	8737
KIRC	RIPK1	DNADamage	0.357255	None	-0.160494564	8737
KIRC	RIPK1	EMT	0.357255	None	0.146710572	8737
KIRC	RIPK1	Hormone AR	0.880081	None	0.011904625	8737
KIRC	RIPK1	Hormone ER	0.357255	None	-0.14399094	8737
KIRC	RIPK1	PI3KAKT	0.357255	None	-0.206255647	8737
KIRC	RIPK1	RASMAPK	0.880081	None	0.032793039	8737
KIRC	RIPK1	RTK	0.357255	None	0.234453087	8737
KIRC	RIPK1	TSCmTOR	0.357255	None	0.159391968	8737
KIRC	RIPK3	Apoptosis	0.00347336	Activation	0.359001669	11035
KIRC	RIPK3	CellCycle	0.323733	None	0.153754045	11035
KIRC	RIPK3	DNADamage	0.00347336	Activation	0.32927532	11035
KIRC	RIPK3	EMT	0.747787	None	0.083269576	11035
KIRC	RIPK3	Hormone AR	0.322374	None	0.109956422	11035
KIRC	RIPK3	Hormone ER	0.823487	None	0.034444062	11035
KIRC	RIPK3	PI3KAKT	0.00375589	Inhibition	-0.554748593	11035
KIRC	RIPK3	RASMAPK	0.823487	None	0.043868022	11035
KIRC	RIPK3	RTK	0.823487	None	0.045569637	11035
KIRC	RIPK3	TSCmTOR	0.322374	None	-0.207207073	11035
KIRC	TLR3	Apoptosis	0.000457198	Inhibition	-0.389126351	7098
KIRC	TLR3	CellCycle	7.44518e-07	Inhibition	-0.617735794	7098
KIRC	TLR3	DNADamage	0.00126062	Inhibition	-0.33798537	7098
KIRC	TLR3	EMT	0.992502	None	-0.001229724	7098
KIRC	TLR3	Hormone AR	0.493452	None	0.066981255	7098
KIRC	TLR3	Hormone ER	0.409259	None	-0.116978615	7098
KIRC	TLR3	PI3KAKT	0.158847	None	0.286167921	7098
KIRC	TLR3	RASMAPK	0.00850243	Activation	0.561482858	7098
KIRC	TLR3	RTK	7.96959e-11	Activation	1.174890655	7098
KIRC	TLR3	TSCmTOR	0.508185	None	0.108087675	7098
KIRC	TNF	Apoptosis	0.277871	None	0.158087205	7124
KIRC	TNF	CellCycle	0.89612	None	-0.015477255	7124
KIRC	TNF	DNADamage	0.226575	None	-0.186721195	7124
KIRC	TNF	EMT	0.277871	None	-0.179989915	7124
KIRC	TNF	Hormone AR	0.89612	None	-0.014603565	7124
KIRC	TNF	Hormone ER	0.89612	None	-0.019111943	7124
KIRC	TNF	PI3KAKT	0.623649	None	-0.133116941	7124
KIRC	TNF	RASMAPK	0.277871	None	0.28976156	7124
KIRC	TNF	RTK	0.226575	None	0.320621939	7124
KIRC	TNF	TSCmTOR	7.7357e-05	Activation	0.642369432	7124
KIRP	FADD	Apoptosis	0.655694	None	0.129775782	8772
KIRP	FADD	CellCycle	0.200912	None	0.367021883	8772
KIRP	FADD	DNADamage	0.655694	None	-0.107860439	8772
KIRP	FADD	EMT	0.752298	None	0.086082476	8772
KIRP	FADD	Hormone AR	0.752298	None	-0.07682783	8772
KIRP	FADD	Hormone ER	0.183422	None	0.290200281	8772
KIRP	FADD	PI3KAKT	0.178936	None	-0.921080764	8772
KIRP	FADD	RASMAPK	0.539119	None	-0.197304136	8772
KIRP	FADD	RTK	0.406176	None	-0.305090196	8772
KIRP	FADD	TSCmTOR	0.633652	None	-0.218664222	8772
KIRP	FAS	Apoptosis	0.00637514	Inhibition	-0.61088724	355
KIRP	FAS	CellCycle	0.127156	None	-0.360798053	355
KIRP	FAS	DNADamage	0.976495	None	-0.005010372	355
KIRP	FAS	EMT	0.976495	None	0.038921981	355
KIRP	FAS	Hormone AR	0.896063	None	0.073523293	355
KIRP	FAS	Hormone ER	0.529305	None	-0.124994198	355
KIRP	FAS	PI3KAKT	0.011845	Activation	1.130663552	355
KIRP	FAS	RASMAPK	0.242066	None	0.264179408	355
KIRP	FAS	RTK	0.121867	None	0.427079651	355
KIRP	FAS	TSCmTOR	0.00637514	Activation	0.7978097	355
KIRP	FASLG	Apoptosis	0.0106054	Activation	0.56586867	356
KIRP	FASLG	CellCycle	0.504918	None	-0.201483687	356
KIRP	FASLG	DNADamage	0.866112	None	0.028726852	356
KIRP	FASLG	EMT	0.0387057	Activation	0.677732034	356
KIRP	FASLG	Hormone AR	0.691961	None	-0.12025968	356
KIRP	FASLG	Hormone ER	0.0106054	Activation	0.442755434	356
KIRP	FASLG	PI3KAKT	0.777331	None	-0.150559776	356
KIRP	FASLG	RASMAPK	0.225848	None	0.304862534	356
KIRP	FASLG	RTK	0.304474	None	-0.312551642	356
KIRP	FASLG	TSCmTOR	0.652039	None	0.186110123	356
KIRP	MLKL	Apoptosis	0.516907	None	0.24255448	197259
KIRP	MLKL	CellCycle	0.0306623	Inhibition	-0.528795071	197259
KIRP	MLKL	DNADamage	0.741681	None	-0.090833006	197259
KIRP	MLKL	EMT	0.905211	None	-0.032014732	197259
KIRP	MLKL	Hormone AR	0.516907	None	-0.220630335	197259
KIRP	MLKL	Hormone ER	0.665683	None	-0.101082012	197259
KIRP	MLKL	PI3KAKT	0.516907	None	0.396289689	197259
KIRP	MLKL	RASMAPK	0.516907	None	-0.227010939	197259
KIRP	MLKL	RTK	0.00640927	Inhibition	-0.735993475	197259
KIRP	MLKL	TSCmTOR	0.905211	None	-0.05629531	197259
KIRP	RIPK1	Apoptosis	0.717398	None	0.082471812	8737
KIRP	RIPK1	CellCycle	0.000240465	Inhibition	-0.809720277	8737
KIRP	RIPK1	DNADamage	0.063083	None	-0.36512039	8737
KIRP	RIPK1	EMT	0.244244	None	0.392118692	8737
KIRP	RIPK1	Hormone AR	0.063083	None	-0.450595872	8737
KIRP	RIPK1	Hormone ER	0.329892	None	-0.167054088	8737
KIRP	RIPK1	PI3KAKT	0.00995586	Activation	1.187229551	8737
KIRP	RIPK1	RASMAPK	0.717398	None	0.065259677	8737
KIRP	RIPK1	RTK	0.670347	None	-0.135295761	8737
KIRP	RIPK1	TSCmTOR	0.00995586	Activation	0.737428524	8737
KIRP	RIPK3	Apoptosis	0.000617846	Activation	0.708600361	11035
KIRP	RIPK3	CellCycle	0.984764	None	-0.003818174	11035
KIRP	RIPK3	DNADamage	0.625519	None	-0.165566495	11035
KIRP	RIPK3	EMT	0.625519	None	0.244733532	11035
KIRP	RIPK3	Hormone AR	0.92847	None	-0.067668285	11035
KIRP	RIPK3	Hormone ER	4.97546e-07	Activation	0.740766269	11035
KIRP	RIPK3	PI3KAKT	0.625519	None	-0.418234159	11035
KIRP	RIPK3	RASMAPK	0.174296	None	0.3511649	11035
KIRP	RIPK3	RTK	0.790494	None	0.131467182	11035
KIRP	RIPK3	TSCmTOR	0.984764	None	0.008824892	11035
KIRP	TLR3	Apoptosis	0.322534	None	-0.260759651	7098
KIRP	TLR3	CellCycle	0.173862	None	-0.379545913	7098
KIRP	TLR3	DNADamage	0.322534	None	-0.202898367	7098
KIRP	TLR3	EMT	0.322534	None	-0.364367517	7098
KIRP	TLR3	Hormone AR	0.473563	None	-0.162201219	7098
KIRP	TLR3	Hormone ER	0.995496	None	0.000792341	7098
KIRP	TLR3	PI3KAKT	0.0698743	None	0.951505028	7098
KIRP	TLR3	RASMAPK	0.322534	None	0.211261707	7098
KIRP	TLR3	RTK	0.00384866	Activation	0.770605333	7098
KIRP	TLR3	TSCmTOR	0.322534	None	0.285155012	7098
KIRP	TNF	Apoptosis	0.115023	None	0.33768064	7124
KIRP	TNF	CellCycle	0.0624108	None	-0.423087618	7124
KIRP	TNF	DNADamage	0.284542	None	-0.220658673	7124
KIRP	TNF	EMT	0.592237	None	0.144326014	7124
KIRP	TNF	Hormone AR	0.0624108	None	-0.4313911	7124
KIRP	TNF	Hormone ER	0.346548	None	0.151488971	7124
KIRP	TNF	PI3KAKT	0.00588193	Activation	1.204975522	7124
KIRP	TNF	RASMAPK	0.00588193	Activation	0.558716637	7124
KIRP	TNF	RTK	0.531588	None	0.155636631	7124
KIRP	TNF	TSCmTOR	0.00588193	Activation	0.807813796	7124
LGG	FADD	Apoptosis	0.0622958	None	0.163198944	8772
LGG	FADD	CellCycle	0.0201533	Activation	0.313956203	8772
LGG	FADD	DNADamage	0.000235543	Activation	0.573867009	8772
LGG	FADD	EMT	0.284858	None	0.11928673	8772
LGG	FADD	Hormone AR	0.872494	None	0.020681912	8772
LGG	FADD	Hormone ER	0.284858	None	0.087010265	8772
LGG	FADD	PI3KAKT	0.0355291	Activation	0.487535387	8772
LGG	FADD	RASMAPK	0.89824	None	0.019650584	8772
LGG	FADD	RTK	0.239488	None	0.277334235	8772
LGG	FADD	TSCmTOR	0.239488	None	-0.205461237	8772
LGG	FAS	Apoptosis	0.923114	None	0.013640701	355
LGG	FAS	CellCycle	0.0212403	Activation	0.294304685	355
LGG	FAS	DNADamage	0.0212403	Inhibition	-0.373796075	355
LGG	FAS	EMT	0.0707988	None	0.203244098	355
LGG	FAS	Hormone AR	0.0707988	None	-0.158547824	355
LGG	FAS	Hormone ER	0.494487	None	0.068435048	355
LGG	FAS	PI3KAKT	0.923114	None	0.018502503	355
LGG	FAS	RASMAPK	0.32093	None	0.202174198	355
LGG	FAS	RTK	0.0212403	Activation	0.543159589	355
LGG	FAS	TSCmTOR	0.923114	None	-0.021043367	355
LGG	FASLG	Apoptosis	0.639753	None	0.040887031	356
LGG	FASLG	CellCycle	0.958432	None	0.005663036	356
LGG	FASLG	DNADamage	0.639753	None	-0.107876883	356
LGG	FASLG	EMT	0.116755	None	0.196747137	356
LGG	FASLG	Hormone AR	0.0706532	None	-0.202556158	356
LGG	FASLG	Hormone ER	0.639753	None	-0.045548493	356
LGG	FASLG	PI3KAKT	0.0706532	None	0.470706122	356
LGG	FASLG	RASMAPK	0.116755	None	0.306845802	356
LGG	FASLG	RTK	0.564329	None	0.197196543	356
LGG	FASLG	TSCmTOR	0.639753	None	0.10038933	356
LGG	MLKL	Apoptosis	0.0025241	Activation	0.267562242	197259
LGG	MLKL	CellCycle	0.037567	Activation	0.264720694	197259
LGG	MLKL	DNADamage	0.468184	None	-0.099185865	197259
LGG	MLKL	EMT	0.0115882	Activation	0.290940296	197259
LGG	MLKL	Hormone AR	0.150639	None	-0.122715421	197259
LGG	MLKL	Hormone ER	0.0246621	Activation	0.192193867	197259
LGG	MLKL	PI3KAKT	0.468184	None	0.154391436	197259
LGG	MLKL	RASMAPK	0.394138	None	0.154197435	197259
LGG	MLKL	RTK	0.0385349	Activation	0.436489712	197259
LGG	MLKL	TSCmTOR	0.150639	None	-0.235908499	197259
LGG	RIPK1	Apoptosis	0.412951	None	0.071277551	8737
LGG	RIPK1	CellCycle	1.8959e-05	Activation	0.500827397	8737
LGG	RIPK1	DNADamage	0.473293	None	0.108852931	8737
LGG	RIPK1	EMT	0.0260974	Activation	0.230488322	8737
LGG	RIPK1	Hormone AR	0.936081	None	0.006089837	8737
LGG	RIPK1	Hormone ER	1.0034e-05	Activation	0.350214368	8737
LGG	RIPK1	PI3KAKT	0.000646582	Activation	0.710996865	8737
LGG	RIPK1	RASMAPK	0.0038084	Activation	0.487803014	8737
LGG	RIPK1	RTK	0.00774359	Activation	0.537522686	8737
LGG	RIPK1	TSCmTOR	0.405337	None	-0.150986825	8737
LGG	RIPK3	Apoptosis	0.0379639	Activation	0.165999267	11035
LGG	RIPK3	CellCycle	0.0059156	Activation	0.32942986	11035
LGG	RIPK3	DNADamage	0.849967	None	-0.025787036	11035
LGG	RIPK3	EMT	0.328218	None	0.106781621	11035
LGG	RIPK3	Hormone AR	0.780498	None	0.028891972	11035
LGG	RIPK3	Hormone ER	4.9106e-09	Activation	0.439402752	11035
LGG	RIPK3	PI3KAKT	0.0123727	Activation	0.523729191	11035
LGG	RIPK3	RASMAPK	0.000485067	Activation	0.595945708	11035
LGG	RIPK3	RTK	0.00289559	Activation	0.613854528	11035
LGG	RIPK3	TSCmTOR	0.13149	None	-0.237249773	11035
LGG	TLR3	Apoptosis	0.48513	None	-0.069678132	7098
LGG	TLR3	CellCycle	0.0122635	Activation	0.303709338	7098
LGG	TLR3	DNADamage	0.0634417	None	-0.287632749	7098
LGG	TLR3	EMT	0.975035	None	0.00296631	7098
LGG	TLR3	Hormone AR	0.578748	None	0.055381341	7098
LGG	TLR3	Hormone ER	0.000191274	Activation	0.30712016	7098
LGG	TLR3	PI3KAKT	0.0634417	None	0.397955438	7098
LGG	TLR3	RASMAPK	0.00286241	Activation	0.512363119	7098
LGG	TLR3	RTK	0.00286241	Activation	0.615052971	7098
LGG	TLR3	TSCmTOR	0.932773	None	0.028681124	7098
LGG	TNF	Apoptosis	0.775167	None	-0.02532996	7124
LGG	TNF	CellCycle	0.775167	None	0.05084509	7124
LGG	TNF	DNADamage	0.181085	None	-0.263223487	7124
LGG	TNF	EMT	0.775167	None	-0.02707851	7124
LGG	TNF	Hormone AR	0.253756	None	0.123617511	7124
LGG	TNF	Hormone ER	0.00786908	Activation	0.22777572	7124
LGG	TNF	PI3KAKT	0.775167	None	0.058999746	7124
LGG	TNF	RASMAPK	0.000620481	Activation	0.612792329	7124
LGG	TNF	RTK	0.775167	None	-0.131085807	7124
LGG	TNF	TSCmTOR	0.775167	None	0.062332755	7124
LIHC	FADD	Apoptosis	0.804293	None	0.070301537	8772
LIHC	FADD	CellCycle	0.906358	None	-0.018243912	8772
LIHC	FADD	DNADamage	0.906358	None	-0.017599133	8772
LIHC	FADD	EMT	0.11451	None	0.353145243	8772
LIHC	FADD	Hormone AR	0.0791615	None	-0.297873232	8772
LIHC	FADD	Hormone ER	0.0828699	None	-0.312456961	8772
LIHC	FADD	PI3KAKT	0.483816	None	-0.207375582	8772
LIHC	FADD	RASMAPK	0.814049	None	-0.07784493	8772
LIHC	FADD	RTK	0.10212	None	-0.359619245	8772
LIHC	FADD	TSCmTOR	0.804293	None	0.107723113	8772
LIHC	FAS	Apoptosis	0.838422	None	0.051167083	355
LIHC	FAS	CellCycle	0.838422	None	-0.044906239	355
LIHC	FAS	DNADamage	0.838422	None	-0.058948923	355
LIHC	FAS	EMT	0.970913	None	0.006133827	355
LIHC	FAS	Hormone AR	0.0454458	Activation	0.274773133	355
LIHC	FAS	Hormone ER	0.000744981	Activation	0.486400627	355
LIHC	FAS	PI3KAKT	0.275986	None	-0.245473781	355
LIHC	FAS	RASMAPK	0.0497222	Activation	0.373984172	355
LIHC	FAS	RTK	0.0462235	Activation	0.393138041	355
LIHC	FAS	TSCmTOR	0.950428	None	-0.030199296	355
LIHC	FASLG	Apoptosis	0.364807	None	0.155703589	356
LIHC	FASLG	CellCycle	0.630124	None	0.048135955	356
LIHC	FASLG	DNADamage	0.0477626	Activation	0.327908963	356
LIHC	FASLG	EMT	0.032843	Activation	0.437517816	356
LIHC	FASLG	Hormone AR	0.513672	None	0.10771383	356
LIHC	FASLG	Hormone ER	0.032843	Activation	0.333282228	356
LIHC	FASLG	PI3KAKT	0.630124	None	0.093285115	356
LIHC	FASLG	RASMAPK	0.032843	Activation	0.471628485	356
LIHC	FASLG	RTK	0.630124	None	0.098875512	356
LIHC	FASLG	TSCmTOR	0.630124	None	0.107499799	356
LIHC	MLKL	Apoptosis	0.273905	None	0.221659761	197259
LIHC	MLKL	CellCycle	0.473547	None	-0.098823089	197259
LIHC	MLKL	DNADamage	0.473547	None	0.149706698	197259
LIHC	MLKL	EMT	0.473547	None	0.180054864	197259
LIHC	MLKL	Hormone AR	0.488279	None	0.076413982	197259
LIHC	MLKL	Hormone ER	0.488279	None	0.086405566	197259
LIHC	MLKL	PI3KAKT	0.273905	None	-0.325951915	197259
LIHC	MLKL	RASMAPK	0.488279	None	0.117124332	197259
LIHC	MLKL	RTK	0.473547	None	-0.176487718	197259
LIHC	MLKL	TSCmTOR	0.473547	None	-0.195238574	197259
LIHC	RIPK1	Apoptosis	0.877328	None	-0.057063663	8737
LIHC	RIPK1	CellCycle	0.901855	None	-0.012439302	8737
LIHC	RIPK1	DNADamage	0.88305	None	-0.052913258	8737
LIHC	RIPK1	EMT	0.724118	None	-0.206937527	8737
LIHC	RIPK1	Hormone AR	0.767788	None	0.078837559	8737
LIHC	RIPK1	Hormone ER	0.767788	None	0.129313524	8737
LIHC	RIPK1	PI3KAKT	0.724118	None	0.226993099	8737
LIHC	RIPK1	RASMAPK	0.900081	None	-0.039495035	8737
LIHC	RIPK1	RTK	0.767788	None	0.132083667	8737
LIHC	RIPK1	TSCmTOR	0.604811	None	0.31369005	8737
LIHC	RIPK3	Apoptosis	0.031842	Activation	0.300623218	11035
LIHC	RIPK3	CellCycle	0.492179	None	0.083383709	11035
LIHC	RIPK3	DNADamage	0.777733	None	-0.053197464	11035
LIHC	RIPK3	EMT	0.031842	Activation	0.423187758	11035
LIHC	RIPK3	Hormone AR	0.427594	None	-0.11073879	11035
LIHC	RIPK3	Hormone ER	0.303662	None	-0.166341761	11035
LIHC	RIPK3	PI3KAKT	0.0714219	None	-0.376464815	11035
LIHC	RIPK3	RASMAPK	0.923294	None	0.01541428	11035
LIHC	RIPK3	RTK	0.031842	Inhibition	-0.400386929	11035
LIHC	RIPK3	TSCmTOR	0.241373	None	-0.253801027	11035
LIHC	TLR3	Apoptosis	0.826654	None	0.145359944	7098
LIHC	TLR3	CellCycle	0.826654	None	-0.044863395	7098
LIHC	TLR3	DNADamage	0.662749	None	-0.256271149	7098
LIHC	TLR3	EMT	0.826654	None	0.059658988	7098
LIHC	TLR3	Hormone AR	0.826654	None	0.054656411	7098
LIHC	TLR3	Hormone ER	0.826654	None	0.089379722	7098
LIHC	TLR3	PI3KAKT	0.826654	None	0.182514068	7098
LIHC	TLR3	RASMAPK	0.874319	None	-0.025830098	7098
LIHC	TLR3	RTK	0.826654	None	-0.056275996	7098
LIHC	TLR3	TSCmTOR	0.826654	None	0.054436908	7098
LIHC	TNF	Apoptosis	0.287417	None	0.194903534	7124
LIHC	TNF	CellCycle	0.725643	None	0.045780662	7124
LIHC	TNF	DNADamage	0.936489	None	0.011116119	7124
LIHC	TNF	EMT	0.0316597	Activation	0.494205581	7124
LIHC	TNF	Hormone AR	0.71701	None	-0.060161646	7124
LIHC	TNF	Hormone ER	0.602549	None	-0.121851311	7124
LIHC	TNF	PI3KAKT	0.71701	None	-0.11364482	7124
LIHC	TNF	RASMAPK	0.602549	None	-0.14858416	7124
LIHC	TNF	RTK	0.264015	None	-0.309068584	7124
LIHC	TNF	TSCmTOR	0.602549	None	-0.163300885	7124
LUAD	FADD	Apoptosis	0.328419	None	0.176805252	8772
LUAD	FADD	CellCycle	0.10045	None	0.309103992	8772
LUAD	FADD	DNADamage	0.0835111	None	-0.317267529	8772
LUAD	FADD	EMT	0.0141945	Activation	0.700014424	8772
LUAD	FADD	Hormone AR	0.0520985	None	-0.401533043	8772
LUAD	FADD	Hormone ER	0.584942	None	0.043229876	8772
LUAD	FADD	PI3KAKT	0.10045	None	-0.447372358	8772
LUAD	FADD	RASMAPK	0.10045	None	-0.377298778	8772
LUAD	FADD	RTK	0.511598	None	0.160501356	8772
LUAD	FADD	TSCmTOR	0.328419	None	-0.188286255	8772
LUAD	FAS	Apoptosis	0.544546	None	-0.10728882	355
LUAD	FAS	CellCycle	7.753e-05	Inhibition	-0.725447607	355
LUAD	FAS	DNADamage	0.184943	None	-0.239341846	355
LUAD	FAS	EMT	0.000495248	Activation	0.844501689	355
LUAD	FAS	Hormone AR	0.736402	None	0.053659453	355
LUAD	FAS	Hormone ER	0.100356	None	0.161519236	355
LUAD	FAS	PI3KAKT	0.253674	None	-0.29275696	355
LUAD	FAS	RASMAPK	0.0144768	Activation	0.559780075	355
LUAD	FAS	RTK	0.184943	None	0.341787509	355
LUAD	FAS	TSCmTOR	0.196505	None	-0.249326189	355
LUAD	FASLG	Apoptosis	2.7034e-05	Activation	0.718828677	356
LUAD	FASLG	CellCycle	0.900835	None	0.042462881	356
LUAD	FASLG	DNADamage	0.900835	None	0.017947445	356
LUAD	FASLG	EMT	0.0293933	Activation	0.571357124	356
LUAD	FASLG	Hormone AR	0.539551	None	0.175768789	356
LUAD	FASLG	Hormone ER	0.0290584	Activation	0.215028999	356
LUAD	FASLG	PI3KAKT	0.5479	None	-0.225380851	356
LUAD	FASLG	RASMAPK	0.900835	None	-0.045589239	356
LUAD	FASLG	RTK	0.539551	None	-0.240429052	356
LUAD	FASLG	TSCmTOR	0.733016	None	0.110213677	356
LUAD	MLKL	Apoptosis	0.000145041	Activation	0.666046815	197259
LUAD	MLKL	CellCycle	0.739489	None	0.107062248	197259
LUAD	MLKL	DNADamage	0.887859	None	-0.044188891	197259
LUAD	MLKL	EMT	0.180589	None	0.424251234	197259
LUAD	MLKL	Hormone AR	0.887859	None	0.04042658	197259
LUAD	MLKL	Hormone ER	0.466001	None	-0.085008312	197259
LUAD	MLKL	PI3KAKT	0.020316	Inhibition	-0.657396416	197259
LUAD	MLKL	RASMAPK	0.968628	None	0.007775547	197259
LUAD	MLKL	RTK	0.324936	None	-0.30158212	197259
LUAD	MLKL	TSCmTOR	0.324936	None	-0.253949229	197259
LUAD	RIPK1	Apoptosis	0.05976	None	-0.32643701	8737
LUAD	RIPK1	CellCycle	0.0313956	Inhibition	-0.410955135	8737
LUAD	RIPK1	DNADamage	0.0117963	Inhibition	-0.418314446	8737
LUAD	RIPK1	EMT	0.589174	None	0.138550284	8737
LUAD	RIPK1	Hormone AR	0.817574	None	-0.03669984	8737
LUAD	RIPK1	Hormone ER	0.245442	None	-0.101582272	8737
LUAD	RIPK1	PI3KAKT	0.0318676	Activation	0.552139722	8737
LUAD	RIPK1	RASMAPK	0.00250405	Activation	0.682494653	8737
LUAD	RIPK1	RTK	0.00102733	Activation	0.830692123	8737
LUAD	RIPK1	TSCmTOR	0.119364	None	0.291145999	8737
LUAD	RIPK3	Apoptosis	0.00356552	Inhibition	-0.545567268	11035
LUAD	RIPK3	CellCycle	0.0192602	Inhibition	-0.47104317	11035
LUAD	RIPK3	DNADamage	0.906046	None	-0.017055003	11035
LUAD	RIPK3	EMT	0.323608	None	-0.302876436	11035
LUAD	RIPK3	Hormone AR	0.500706	None	0.166601669	11035
LUAD	RIPK3	Hormone ER	0.723972	None	0.035196353	11035
LUAD	RIPK3	PI3KAKT	0.167448	None	0.416412669	11035
LUAD	RIPK3	RASMAPK	0.0843306	None	0.435726506	11035
LUAD	RIPK3	RTK	0.723972	None	0.127892031	11035
LUAD	RIPK3	TSCmTOR	0.723972	None	0.089124565	11035
LUAD	TLR3	Apoptosis	0.00290954	Inhibition	-0.514349557	7098
LUAD	TLR3	CellCycle	1.34335e-09	Inhibition	-1.02768574	7098
LUAD	TLR3	DNADamage	0.0679469	None	-0.294860143	7098
LUAD	TLR3	EMT	0.110191	None	-0.390745843	7098
LUAD	TLR3	Hormone AR	0.0103512	Activation	0.446691495	7098
LUAD	TLR3	Hormone ER	0.268269	None	0.097157499	7098
LUAD	TLR3	PI3KAKT	0.925847	None	-0.021478253	7098
LUAD	TLR3	RASMAPK	0.00125917	Activation	0.716195308	7098
LUAD	TLR3	RTK	0.00594668	Activation	0.649831726	7098
LUAD	TLR3	TSCmTOR	0.35878	None	-0.165370542	7098
LUAD	TNF	Apoptosis	0.203268	None	-0.206038361	7124
LUAD	TNF	CellCycle	0.0323406	Inhibition	-0.393057376	7124
LUAD	TNF	DNADamage	0.0482497	Inhibition	-0.303957737	7124
LUAD	TNF	EMT	0.542331	None	0.131828618	7124
LUAD	TNF	Hormone AR	0.184614	None	-0.230124444	7124
LUAD	TNF	Hormone ER	0.0374095	Activation	0.178441381	7124
LUAD	TNF	PI3KAKT	0.00377351	Activation	0.764622807	7124
LUAD	TNF	RASMAPK	0.00670454	Activation	0.602882756	7124
LUAD	TNF	RTK	0.0133311	Activation	0.597266818	7124
LUAD	TNF	TSCmTOR	0.00377351	Activation	0.57795245	7124
LUSC	FADD	Apoptosis	0.471274	None	0.286091235	8772
LUSC	FADD	CellCycle	0.482811	None	0.196778437	8772
LUSC	FADD	DNADamage	0.471274	None	-0.241966688	8772
LUSC	FADD	EMT	0.856989	None	-0.106930745	8772
LUSC	FADD	Hormone AR	0.640296	None	-0.13701795	8772
LUSC	FADD	Hormone ER	0.482811	None	0.093276732	8772
LUSC	FADD	PI3KAKT	0.902596	None	-0.056801969	8772
LUSC	FADD	RASMAPK	0.902596	None	-0.021224197	8772
LUSC	FADD	RTK	0.856989	None	-0.108839979	8772
LUSC	FADD	TSCmTOR	0.856989	None	-0.079854859	8772
LUSC	FAS	Apoptosis	0.0374711	Activation	0.374025567	355
LUSC	FAS	CellCycle	0.101871	None	-0.273465636	355
LUSC	FAS	DNADamage	0.0374711	Inhibition	-0.329464453	355
LUSC	FAS	EMT	0.00361545	Activation	0.758276697	355
LUSC	FAS	Hormone AR	0.723848	None	0.076639611	355
LUSC	FAS	Hormone ER	0.0374711	Activation	0.152347851	355
LUSC	FAS	PI3KAKT	0.00425796	Inhibition	-1.162486335	355
LUSC	FAS	RASMAPK	0.949381	None	-0.010989134	355
LUSC	FAS	RTK	0.727825	None	0.091005301	355
LUSC	FAS	TSCmTOR	0.0374711	Inhibition	-0.453503356	355
LUSC	FASLG	Apoptosis	0.00134475	Activation	0.557779526	356
LUSC	FASLG	CellCycle	0.640407	None	0.109082802	356
LUSC	FASLG	DNADamage	0.946097	None	-0.009794703	356
LUSC	FASLG	EMT	0.122198	None	0.387607981	356
LUSC	FASLG	Hormone AR	0.0414281	Activation	0.330878202	356
LUSC	FASLG	Hormone ER	0.000301658	Activation	0.269334163	356
LUSC	FASLG	PI3KAKT	0.030378	Inhibition	-0.915345747	356
LUSC	FASLG	RASMAPK	0.93076	None	-0.035342571	356
LUSC	FASLG	RTK	0.640407	None	-0.133565243	356
LUSC	FASLG	TSCmTOR	0.122198	None	-0.366194764	356
LUSC	MLKL	Apoptosis	0.00111189	Activation	0.53905336	197259
LUSC	MLKL	CellCycle	0.923712	None	-0.014632264	197259
LUSC	MLKL	DNADamage	0.114308	None	-0.263245884	197259
LUSC	MLKL	EMT	0.0123344	Activation	0.58510213	197259
LUSC	MLKL	Hormone AR	0.923712	None	-0.02455616	197259
LUSC	MLKL	Hormone ER	0.00111189	Activation	0.229476073	197259
LUSC	MLKL	PI3KAKT	0.000739272	Inhibition	-1.357280789	197259
LUSC	MLKL	RASMAPK	0.923712	None	-0.042845868	197259
LUSC	MLKL	RTK	0.474543	None	-0.198764712	197259
LUSC	MLKL	TSCmTOR	0.000739272	Inhibition	-0.735474178	197259
LUSC	RIPK1	Apoptosis	0.802656	None	0.038649699	8737
LUSC	RIPK1	CellCycle	0.347772	None	-0.176149672	8737
LUSC	RIPK1	DNADamage	0.0142213	Inhibition	-0.430536722	8737
LUSC	RIPK1	EMT	0.400428	None	0.196366652	8737
LUSC	RIPK1	Hormone AR	0.172481	None	-0.244390227	8737
LUSC	RIPK1	Hormone ER	0.16717	None	0.127458345	8737
LUSC	RIPK1	PI3KAKT	0.201668	None	0.53997745	8737
LUSC	RIPK1	RASMAPK	0.000134276	Activation	0.742925804	8737
LUSC	RIPK1	RTK	0.400428	None	0.194780006	8737
LUSC	RIPK1	TSCmTOR	0.172481	None	0.337055505	8737
LUSC	RIPK3	Apoptosis	0.652899	None	-0.114969161	11035
LUSC	RIPK3	CellCycle	0.0243153	Inhibition	-0.456458532	11035
LUSC	RIPK3	DNADamage	0.0280518	Inhibition	-0.377401443	11035
LUSC	RIPK3	EMT	0.917193	None	0.045420482	11035
LUSC	RIPK3	Hormone AR	0.917193	None	-0.014319665	11035
LUSC	RIPK3	Hormone ER	0.0280518	Activation	0.173055676	11035
LUSC	RIPK3	PI3KAKT	0.447339	None	-0.388403998	11035
LUSC	RIPK3	RASMAPK	0.0783379	None	0.371712598	11035
LUSC	RIPK3	RTK	0.158611	None	0.358058065	11035
LUSC	RIPK3	TSCmTOR	0.893544	None	-0.072351446	11035
LUSC	TLR3	Apoptosis	0.109359	None	0.309816927	7098
LUSC	TLR3	CellCycle	0.34663	None	-0.190644899	7098
LUSC	TLR3	DNADamage	0.540809	None	-0.100232071	7098
LUSC	TLR3	EMT	0.67003	None	0.09153069	7098
LUSC	TLR3	Hormone AR	0.00471266	Activation	0.450459512	7098
LUSC	TLR3	Hormone ER	4.9793e-05	Activation	0.294008168	7098
LUSC	TLR3	PI3KAKT	0.013297	Inhibition	-1.001179888	7098
LUSC	TLR3	RASMAPK	0.480728	None	0.160614864	7098
LUSC	TLR3	RTK	0.480728	None	0.177198632	7098
LUSC	TLR3	TSCmTOR	0.34663	None	-0.246102142	7098
LUSC	TNF	Apoptosis	0.0306157	Activation	0.3940165	7124
LUSC	TNF	CellCycle	0.955022	None	-0.008542348	7124
LUSC	TNF	DNADamage	0.0016894	Inhibition	-0.544063464	7124
LUSC	TNF	EMT	0.0107833	Activation	0.65127738	7124
LUSC	TNF	Hormone AR	0.0306157	Inhibition	-0.343193519	7124
LUSC	TNF	Hormone ER	0.676626	None	0.05462581	7124
LUSC	TNF	PI3KAKT	0.68084	None	-0.220731216	7124
LUSC	TNF	RASMAPK	0.307292	None	0.247453953	7124
LUSC	TNF	RTK	0.955022	None	-0.035554619	7124
LUSC	TNF	TSCmTOR	0.68084	None	0.119526682	7124
MESO	FADD	Apoptosis	0.483875	None	-0.312118908	8772
MESO	FADD	CellCycle	0.771002	None	0.250628489	8772
MESO	FADD	DNADamage	0.483875	None	0.565090853	8772
MESO	FADD	EMT	0.243271	None	-0.915683215	8772
MESO	FADD	Hormone AR	0.974815	None	-0.007878617	8772
MESO	FADD	Hormone ER	0.771002	None	-0.131133581	8772
MESO	FADD	PI3KAKT	0.974815	None	0.067331008	8772
MESO	FADD	RASMAPK	0.974815	None	-0.016168744	8772
MESO	FADD	RTK	0.771002	None	0.348921826	8772
MESO	FADD	TSCmTOR	0.483875	None	0.736916376	8772
MESO	FAS	Apoptosis	0.511953	None	0.252770877	355
MESO	FAS	CellCycle	0.511953	None	-0.269516093	355
MESO	FAS	DNADamage	0.45804	None	-0.560220281	355
MESO	FAS	EMT	0.511953	None	0.338436839	355
MESO	FAS	Hormone AR	0.45804	None	-0.346761144	355
MESO	FAS	Hormone ER	0.511953	None	-0.15614992	355
MESO	FAS	PI3KAKT	0.511953	None	-0.406613412	355
MESO	FAS	RASMAPK	0.45804	None	0.636635881	355
MESO	FAS	RTK	0.45804	None	0.711034777	355
MESO	FAS	TSCmTOR	0.659729	None	-0.218034833	355
MESO	FASLG	Apoptosis	0.786685	None	0.416236214	356
MESO	FASLG	CellCycle	0.914584	None	0.070058586	356
MESO	FASLG	DNADamage	0.860384	None	-0.212689339	356
MESO	FASLG	EMT	0.786685	None	-0.582552448	356
MESO	FASLG	Hormone AR	0.859403	None	-0.238075575	356
MESO	FASLG	Hormone ER	0.860384	None	0.125379238	356
MESO	FASLG	PI3KAKT	0.908064	None	-0.157943288	356
MESO	FASLG	RASMAPK	0.914584	None	0.048919941	356
MESO	FASLG	RTK	0.860384	None	0.337452976	356
MESO	FASLG	TSCmTOR	0.786685	None	0.57101095	356
MESO	MLKL	Apoptosis	0.950875	None	0.023160129	197259
MESO	MLKL	CellCycle	0.950875	None	-0.256896566	197259
MESO	MLKL	DNADamage	0.950875	None	0.134690869	197259
MESO	MLKL	EMT	0.950875	None	0.129380188	197259
MESO	MLKL	Hormone AR	0.950875	None	-0.015709924	197259
MESO	MLKL	Hormone ER	0.950875	None	0.12453232	197259
MESO	MLKL	PI3KAKT	0.950875	None	0.167188852	197259
MESO	MLKL	RASMAPK	0.950875	None	0.515670395	197259
MESO	MLKL	RTK	0.950875	None	-0.028250456	197259
MESO	MLKL	TSCmTOR	0.950875	None	0.649976712	197259
MESO	RIPK1	Apoptosis	0.730679	None	0.090016068	8737
MESO	RIPK1	CellCycle	0.341037	None	0.442506281	8737
MESO	RIPK1	DNADamage	0.623172	None	-0.296849159	8737
MESO	RIPK1	EMT	0.623172	None	0.291646942	8737
MESO	RIPK1	Hormone AR	0.124924	None	-0.492641947	8737
MESO	RIPK1	Hormone ER	0.730679	None	-0.071856139	8737
MESO	RIPK1	PI3KAKT	0.124924	None	0.941683931	8737
MESO	RIPK1	RASMAPK	0.0213508	Activation	1.36482461	8737
MESO	RIPK1	RTK	0.16639	None	0.734593728	8737
MESO	RIPK1	TSCmTOR	0.124924	None	0.984197568	8737
MESO	RIPK3	Apoptosis	0.777565	None	-0.17621412	11035
MESO	RIPK3	CellCycle	0.246408	None	-0.757532499	11035
MESO	RIPK3	DNADamage	0.777565	None	0.370939843	11035
MESO	RIPK3	EMT	0.887026	None	-0.085324965	11035
MESO	RIPK3	Hormone AR	0.296351	None	0.480035456	11035
MESO	RIPK3	Hormone ER	0.887026	None	-0.029049753	11035
MESO	RIPK3	PI3KAKT	0.887026	None	-0.187280423	11035
MESO	RIPK3	RASMAPK	0.777565	None	-0.328542972	11035
MESO	RIPK3	RTK	0.701598	None	-0.533862811	11035
MESO	RIPK3	TSCmTOR	0.887026	None	-0.123842155	11035
MESO	TLR3	Apoptosis	0.715046	None	-0.088852517	7098
MESO	TLR3	CellCycle	0.457311	None	-0.461072791	7098
MESO	TLR3	DNADamage	0.457311	None	-0.41093058	7098
MESO	TLR3	EMT	0.457311	None	-0.421988486	7098
MESO	TLR3	Hormone AR	0.457311	None	-0.405435669	7098
MESO	TLR3	Hormone ER	0.640245	None	-0.135576889	7098
MESO	TLR3	PI3KAKT	0.640245	None	0.245134984	7098
MESO	TLR3	RASMAPK	0.457311	None	0.444113617	7098
MESO	TLR3	RTK	0.457311	None	0.638289068	7098
MESO	TLR3	TSCmTOR	0.457311	None	0.516923394	7098
MESO	TNF	Apoptosis	0.782691	None	0.286086535	7124
MESO	TNF	CellCycle	0.716603	None	-0.631449011	7124
MESO	TNF	DNADamage	0.80457	None	-0.224041147	7124
MESO	TNF	EMT	0.80457	None	-0.196846554	7124
MESO	TNF	Hormone AR	0.80457	None	0.248982694	7124
MESO	TNF	Hormone ER	0.782691	None	0.245971	7124
MESO	TNF	PI3KAKT	0.988163	None	-0.021696359	7124
MESO	TNF	RASMAPK	0.988163	None	-0.007016279	7124
MESO	TNF	RTK	0.80457	None	-0.282147637	7124
MESO	TNF	TSCmTOR	0.80457	None	0.33104598	7124
OV	FADD	Apoptosis	0.727127	None	-0.143546483	8772
OV	FADD	CellCycle	0.727127	None	0.226515123	8772
OV	FADD	DNADamage	0.539048	None	0.349282015	8772
OV	FADD	EMT	0.0135072	Inhibition	-0.897739982	8772
OV	FADD	Hormone AR	0.727127	None	0.1049595	8772
OV	FADD	Hormone ER	0.00939937	Activation	0.891140882	8772
OV	FADD	PI3KAKT	0.727127	None	0.209830925	8772
OV	FADD	RASMAPK	0.727127	None	0.160809098	8772
OV	FADD	RTK	0.732211	None	0.052259833	8772
OV	FADD	TSCmTOR	0.727127	None	-0.201192136	8772
OV	FAS	Apoptosis	0.479758	None	0.160959952	355
OV	FAS	CellCycle	0.0349364	Inhibition	-0.593879796	355
OV	FAS	DNADamage	8.54077e-09	Inhibition	-1.475989893	355
OV	FAS	EMT	0.0332718	Activation	0.743498358	355
OV	FAS	Hormone AR	0.00602017	Inhibition	-0.616733197	355
OV	FAS	Hormone ER	0.104657	None	-0.505476747	355
OV	FAS	PI3KAKT	0.821027	None	-0.123440861	355
OV	FAS	RASMAPK	0.0162882	Activation	1.002487853	355
OV	FAS	RTK	0.248603	None	0.207297788	355
OV	FAS	TSCmTOR	0.847458	None	0.040432005	355
OV	FASLG	Apoptosis	0.0021829	Activation	0.641156417	356
OV	FASLG	CellCycle	0.518729	None	-0.182925309	356
OV	FASLG	DNADamage	3.697e-05	Inhibition	-1.130506985	356
OV	FASLG	EMT	0.230632	None	0.447596776	356
OV	FASLG	Hormone AR	0.0749231	None	-0.436589814	356
OV	FASLG	Hormone ER	0.33828	None	-0.300391761	356
OV	FASLG	PI3KAKT	0.17949	None	-0.666066904	356
OV	FASLG	RASMAPK	0.213954	None	0.578257119	356
OV	FASLG	RTK	0.332063	None	-0.182694481	356
OV	FASLG	TSCmTOR	0.537242	None	-0.130093709	356
OV	MLKL	Apoptosis	0.000519046	Activation	0.706970474	197259
OV	MLKL	CellCycle	0.521759	None	-0.203512309	197259
OV	MLKL	DNADamage	3.26939e-10	Inhibition	-1.599674587	197259
OV	MLKL	EMT	0.0308002	Activation	0.72790517	197259
OV	MLKL	Hormone AR	0.00994999	Inhibition	-0.567432439	197259
OV	MLKL	Hormone ER	0.0305518	Inhibition	-0.679236108	197259
OV	MLKL	PI3KAKT	0.421749	None	-0.386365389	197259
OV	MLKL	RASMAPK	0.0760256	None	0.714298736	197259
OV	MLKL	RTK	0.61142	None	-0.091077522	197259
OV	MLKL	TSCmTOR	0.905556	None	0.02483547	197259
OV	RIPK1	Apoptosis	0.965886	None	0.00790788	8737
OV	RIPK1	CellCycle	0.148841	None	-0.5023775	8737
OV	RIPK1	DNADamage	0.174739	None	-0.443779468	8737
OV	RIPK1	EMT	0.043035	Activation	0.814292963	8737
OV	RIPK1	Hormone AR	0.234343	None	-0.253509004	8737
OV	RIPK1	Hormone ER	0.413266	None	-0.242870887	8737
OV	RIPK1	PI3KAKT	0.174739	None	0.60301326	8737
OV	RIPK1	RASMAPK	0.043035	Activation	0.939148747	8737
OV	RIPK1	RTK	0.174739	None	0.248132108	8737
OV	RIPK1	TSCmTOR	0.195582	None	0.313107814	8737
OV	RIPK3	Apoptosis	0.366685	None	0.330975505	11035
OV	RIPK3	CellCycle	0.552645	None	-0.192950525	11035
OV	RIPK3	DNADamage	0.0184839	Inhibition	-0.77383834	11035
OV	RIPK3	EMT	0.542378	None	-0.308087733	11035
OV	RIPK3	Hormone AR	0.552645	None	-0.15229363	11035
OV	RIPK3	Hormone ER	0.723509	None	0.123475235	11035
OV	RIPK3	PI3KAKT	0.542378	None	-0.438353343	11035
OV	RIPK3	RASMAPK	0.778651	None	0.100812237	11035
OV	RIPK3	RTK	0.542378	None	-0.208321052	11035
OV	RIPK3	TSCmTOR	0.542378	None	-0.205404654	11035
OV	TLR3	Apoptosis	0.497336	None	-0.178237868	7098
OV	TLR3	CellCycle	0.196173	None	-0.507729969	7098
OV	TLR3	DNADamage	0.196173	None	-0.475505326	7098
OV	TLR3	EMT	0.10774	None	-0.770138611	7098
OV	TLR3	Hormone AR	0.895651	None	0.025368158	7098
OV	TLR3	Hormone ER	0.497336	None	0.257306417	7098
OV	TLR3	PI3KAKT	0.497336	None	-0.406983445	7098
OV	TLR3	RASMAPK	0.35432	None	0.529327871	7098
OV	TLR3	RTK	0.895651	None	0.037516014	7098
OV	TLR3	TSCmTOR	0.895651	None	-0.06444331	7098
OV	TNF	Apoptosis	0.235045	None	0.41629584	7124
OV	TNF	CellCycle	0.448953	None	0.306429922	7124
OV	TNF	DNADamage	0.663482	None	-0.156778604	7124
OV	TNF	EMT	0.980203	None	0.033797116	7124
OV	TNF	Hormone AR	0.414887	None	-0.263595207	7124
OV	TNF	Hormone ER	0.493948	None	-0.28249755	7124
OV	TNF	PI3KAKT	0.549666	None	-0.3198517	7124
OV	TNF	RASMAPK	0.270828	None	0.618709014	7124
OV	TNF	RTK	0.980203	None	-0.003753416	7124
OV	TNF	TSCmTOR	0.270828	None	0.389247293	7124
PAAD	FADD	Apoptosis	0.15473	None	-0.581261337	8772
PAAD	FADD	CellCycle	0.348121	None	0.214895417	8772
PAAD	FADD	DNADamage	0.15473	None	-0.748174384	8772
PAAD	FADD	EMT	0.513364	None	0.331946625	8772
PAAD	FADD	Hormone AR	0.196541	None	-0.624731698	8772
PAAD	FADD	Hormone ER	0.15473	None	-0.386778902	8772
PAAD	FADD	PI3KAKT	0.348121	None	-0.39066764	8772
PAAD	FADD	RASMAPK	0.15473	None	0.468434682	8772
PAAD	FADD	RTK	0.275177	None	0.340604875	8772
PAAD	FADD	TSCmTOR	0.253184	None	-0.404826052	8772
PAAD	FAS	Apoptosis	0.0101329	Activation	0.996380338	355
PAAD	FAS	CellCycle	0.375921	None	-0.204264827	355
PAAD	FAS	DNADamage	0.375921	None	0.417065591	355
PAAD	FAS	EMT	0.055473	None	1.142726635	355
PAAD	FAS	Hormone AR	0.375921	None	0.374938088	355
PAAD	FAS	Hormone ER	0.375921	None	0.194676641	355
PAAD	FAS	PI3KAKT	0.262553	None	-0.587764616	355
PAAD	FAS	RASMAPK	0.05415	None	0.603678061	355
PAAD	FAS	RTK	0.05415	None	0.622146784	355
PAAD	FAS	TSCmTOR	0.904957	None	-0.034081824	355
PAAD	FASLG	Apoptosis	0.425356	None	0.371382516	356
PAAD	FASLG	CellCycle	0.544994	None	-0.164426702	356
PAAD	FASLG	DNADamage	0.0459387	Activation	1.001290228	356
PAAD	FASLG	EMT	0.545189	None	-0.351968659	356
PAAD	FASLG	Hormone AR	0.0459387	Activation	0.97214567	356
PAAD	FASLG	Hormone ER	0.491483	None	0.163049566	356
PAAD	FASLG	PI3KAKT	0.324227	None	0.586982208	356
PAAD	FASLG	RASMAPK	0.978904	None	-0.006691065	356
PAAD	FASLG	RTK	0.151656	None	0.518357006	356
PAAD	FASLG	TSCmTOR	0.425356	None	0.321945932	356
PAAD	MLKL	Apoptosis	0.428137	None	0.385687567	197259
PAAD	MLKL	CellCycle	0.428137	None	0.261249986	197259
PAAD	MLKL	DNADamage	0.79567	None	0.125180813	197259
PAAD	MLKL	EMT	0.428137	None	-0.592204614	197259
PAAD	MLKL	Hormone AR	0.428137	None	0.423104781	197259
PAAD	MLKL	Hormone ER	0.79567	None	-0.06729504	197259
PAAD	MLKL	PI3KAKT	0.113585	None	-0.93630639	197259
PAAD	MLKL	RASMAPK	0.658067	None	-0.188056372	197259
PAAD	MLKL	RTK	0.79567	None	0.067821328	197259
PAAD	MLKL	TSCmTOR	0.113585	None	-0.651060754	197259
PAAD	RIPK1	Apoptosis	0.520759	None	0.228699621	8737
PAAD	RIPK1	CellCycle	0.520759	None	0.1611444	8737
PAAD	RIPK1	DNADamage	0.520759	None	-0.464240108	8737
PAAD	RIPK1	EMT	0.520759	None	0.555724339	8737
PAAD	RIPK1	Hormone AR	0.520759	None	-0.406094656	8737
PAAD	RIPK1	Hormone ER	0.45444	None	0.296164897	8737
PAAD	RIPK1	PI3KAKT	0.520759	None	0.251922118	8737
PAAD	RIPK1	RASMAPK	0.520759	None	0.217836073	8737
PAAD	RIPK1	RTK	0.45444	None	0.440864751	8737
PAAD	RIPK1	TSCmTOR	0.520759	None	0.181915802	8737
PAAD	RIPK3	Apoptosis	0.205385	None	0.637915932	11035
PAAD	RIPK3	CellCycle	0.845612	None	0.110524494	11035
PAAD	RIPK3	DNADamage	0.845612	None	0.113665618	11035
PAAD	RIPK3	EMT	0.273708	None	-0.713257942	11035
PAAD	RIPK3	Hormone AR	0.205385	None	0.681278835	11035
PAAD	RIPK3	Hormone ER	0.845612	None	-0.070722171	11035
PAAD	RIPK3	PI3KAKT	0.205385	None	-0.673011606	11035
PAAD	RIPK3	RASMAPK	0.961131	None	0.012319273	11035
PAAD	RIPK3	RTK	0.273708	None	0.362392511	11035
PAAD	RIPK3	TSCmTOR	0.205385	None	-0.5428827	11035
PAAD	TLR3	Apoptosis	0.56001	None	0.28933626	7098
PAAD	TLR3	CellCycle	0.56001	None	-0.181826141	7098
PAAD	TLR3	DNADamage	0.703033	None	0.143443682	7098
PAAD	TLR3	EMT	0.56001	None	-0.702575721	7098
PAAD	TLR3	Hormone AR	0.56001	None	0.323122896	7098
PAAD	TLR3	Hormone ER	0.56001	None	0.219240766	7098
PAAD	TLR3	PI3KAKT	0.599653	None	-0.27700133	7098
PAAD	TLR3	RASMAPK	0.621621	None	0.149169748	7098
PAAD	TLR3	RTK	0.18927	None	0.616105877	7098
PAAD	TLR3	TSCmTOR	0.56001	None	-0.274393593	7098
PAAD	TNF	Apoptosis	0.994578	None	0.002139104	7124
PAAD	TNF	CellCycle	0.432555	None	-0.359510474	7124
PAAD	TNF	DNADamage	0.732692	None	-0.204591538	7124
PAAD	TNF	EMT	0.181216	None	1.17745611	7124
PAAD	TNF	Hormone AR	0.732692	None	-0.216327417	7124
PAAD	TNF	Hormone ER	0.732692	None	0.177823561	7124
PAAD	TNF	PI3KAKT	0.732692	None	0.296054653	7124
PAAD	TNF	RASMAPK	0.732692	None	0.202982697	7124
PAAD	TNF	RTK	0.82082	None	-0.087360799	7124
PAAD	TNF	TSCmTOR	0.732692	None	0.168310094	7124
PCPG	FADD	Apoptosis	0.723064	None	-0.24475418	8772
PCPG	FADD	CellCycle	0.856257	None	0.04799476	8772
PCPG	FADD	DNADamage	0.298326	None	-0.473654441	8772
PCPG	FADD	EMT	0.443597	None	0.214706744	8772
PCPG	FADD	Hormone AR	0.168172	None	-0.594366086	8772
PCPG	FADD	Hormone ER	0.856257	None	0.028943862	8772
PCPG	FADD	PI3KAKT	0.168172	None	0.870283053	8772
PCPG	FADD	RASMAPK	0.0693815	None	0.949800332	8772
PCPG	FADD	RTK	0.809098	None	-0.112241258	8772
PCPG	FADD	TSCmTOR	0.335226	None	0.652511905	8772
PCPG	FAS	Apoptosis	0.142374	None	-0.685478436	355
PCPG	FAS	CellCycle	0.142374	None	-0.431682135	355
PCPG	FAS	DNADamage	0.112457	None	-0.690972676	355
PCPG	FAS	EMT	0.142374	None	0.351283276	355
PCPG	FAS	Hormone AR	0.112457	None	-0.787900458	355
PCPG	FAS	Hormone ER	0.774079	None	-0.045640378	355
PCPG	FAS	PI3KAKT	0.519253	None	0.384367437	355
PCPG	FAS	RASMAPK	0.531264	None	0.284315057	355
PCPG	FAS	RTK	0.688027	None	-0.123731648	355
PCPG	FAS	TSCmTOR	0.142374	None	0.801918327	355
PCPG	FASLG	Apoptosis	0.874962	None	0.058316352	356
PCPG	FASLG	CellCycle	0.314445	None	-0.390210313	356
PCPG	FASLG	DNADamage	0.314445	None	-0.500792962	356
PCPG	FASLG	EMT	0.314445	None	0.40078039	356
PCPG	FASLG	Hormone AR	0.817992	None	-0.267811362	356
PCPG	FASLG	Hormone ER	0.817992	None	-0.153738624	356
PCPG	FASLG	PI3KAKT	0.850387	None	-0.281575805	356
PCPG	FASLG	RASMAPK	0.856606	None	0.102266695	356
PCPG	FASLG	RTK	0.856606	None	-0.107929444	356
PCPG	FASLG	TSCmTOR	0.856606	None	0.139608701	356
PCPG	MLKL	Apoptosis	0.0886551	None	-0.731534172	197259
PCPG	MLKL	CellCycle	0.0886551	None	-0.459229911	197259
PCPG	MLKL	DNADamage	0.863752	None	-0.052363858	197259
PCPG	MLKL	EMT	0.0597656	None	0.46916719	197259
PCPG	MLKL	Hormone AR	0.612143	None	-0.221597125	197259
PCPG	MLKL	Hormone ER	0.3719	None	0.191817395	197259
PCPG	MLKL	PI3KAKT	0.743608	None	-0.187630984	197259
PCPG	MLKL	RASMAPK	0.0597656	None	-0.921137146	197259
PCPG	MLKL	RTK	0.612143	None	0.17164735	197259
PCPG	MLKL	TSCmTOR	0.0886551	None	-1.035593593	197259
PCPG	RIPK1	Apoptosis	0.372644	None	0.484232715	8737
PCPG	RIPK1	CellCycle	0.493397	None	-0.214238301	8737
PCPG	RIPK1	DNADamage	0.889597	None	-0.044928133	8737
PCPG	RIPK1	EMT	0.494532	None	0.164582904	8737
PCPG	RIPK1	Hormone AR	0.372644	None	-0.471270014	8737
PCPG	RIPK1	Hormone ER	0.443251	None	-0.178591008	8737
PCPG	RIPK1	PI3KAKT	0.372644	None	0.573579964	8737
PCPG	RIPK1	RASMAPK	0.337744	None	0.635216089	8737
PCPG	RIPK1	RTK	0.819107	None	-0.080104577	8737
PCPG	RIPK1	TSCmTOR	0.337744	None	0.929555582	8737
PCPG	RIPK3	Apoptosis	0.228485	None	-0.667156145	11035
PCPG	RIPK3	CellCycle	0.228485	None	-0.47381317	11035
PCPG	RIPK3	DNADamage	0.578232	None	-0.22616685	11035
PCPG	RIPK3	EMT	0.228485	None	0.330734598	11035
PCPG	RIPK3	Hormone AR	0.239413	None	-0.535440159	11035
PCPG	RIPK3	Hormone ER	0.333699	None	0.208910441	11035
PCPG	RIPK3	PI3KAKT	0.299864	None	0.630385187	11035
PCPG	RIPK3	RASMAPK	0.841465	None	0.072208245	11035
PCPG	RIPK3	RTK	0.578232	None	0.191007915	11035
PCPG	RIPK3	TSCmTOR	0.65106	None	-0.259186282	11035
PCPG	TLR3	Apoptosis	0.369452	None	0.463486367	7098
PCPG	TLR3	CellCycle	0.751991	None	0.133255752	7098
PCPG	TLR3	DNADamage	0.0928898	None	-0.665985053	7098
PCPG	TLR3	EMT	0.903294	None	0.023245877	7098
PCPG	TLR3	Hormone AR	0.881371	None	-0.08651959	7098
PCPG	TLR3	Hormone ER	0.778867	None	0.086931991	7098
PCPG	TLR3	PI3KAKT	0.0928898	None	0.851278931	7098
PCPG	TLR3	RASMAPK	0.0675594	None	0.823863906	7098
PCPG	TLR3	RTK	0.00307476	Activation	0.800634436	7098
PCPG	TLR3	TSCmTOR	0.369452	None	0.622126155	7098
PCPG	TNF	Apoptosis	0.112723	None	-0.716777766	7124
PCPG	TNF	CellCycle	0.0105033	Inhibition	-0.696783697	7124
PCPG	TNF	DNADamage	0.112723	None	-0.601304017	7124
PCPG	TNF	EMT	0.542659	None	0.187371556	7124
PCPG	TNF	Hormone AR	0.872075	None	-0.085077367	7124
PCPG	TNF	Hormone ER	0.885584	None	-0.022737502	7124
PCPG	TNF	PI3KAKT	0.542659	None	0.419757046	7124
PCPG	TNF	RASMAPK	0.633421	None	0.229904067	7124
PCPG	TNF	RTK	0.627496	None	-0.186612493	7124
PCPG	TNF	TSCmTOR	0.0669805	None	1.132493569	7124
PRAD	FADD	Apoptosis	0.849831	None	0.016902139	8772
PRAD	FADD	CellCycle	0.183444	None	0.130076291	8772
PRAD	FADD	DNADamage	0.183444	None	0.175931692	8772
PRAD	FADD	EMT	0.849831	None	0.039418144	8772
PRAD	FADD	Hormone AR	0.020492	Activation	0.392817382	8772
PRAD	FADD	Hormone ER	0.849831	None	0.024752089	8772
PRAD	FADD	PI3KAKT	0.183444	None	-0.364351585	8772
PRAD	FADD	RASMAPK	0.166193	None	-0.407696601	8772
PRAD	FADD	RTK	0.183444	None	-0.228099698	8772
PRAD	FADD	TSCmTOR	0.0324546	Inhibition	-0.502574277	8772
PRAD	FAS	Apoptosis	0.770016	None	-0.033789561	355
PRAD	FAS	CellCycle	0.0679699	None	-0.209598404	355
PRAD	FAS	DNADamage	0.42993	None	-0.131670514	355
PRAD	FAS	EMT	0.157506	None	0.41088918	355
PRAD	FAS	Hormone AR	0.0441481	Inhibition	-0.359710665	355
PRAD	FAS	Hormone ER	0.42993	None	0.069644841	355
PRAD	FAS	PI3KAKT	0.770016	None	0.140434288	355
PRAD	FAS	RASMAPK	0.819714	None	0.04762813	355
PRAD	FAS	RTK	0.42993	None	0.166261964	355
PRAD	FAS	TSCmTOR	0.770016	None	0.091070087	355
PRAD	FASLG	Apoptosis	0.818662	None	-0.023081885	356
PRAD	FASLG	CellCycle	0.818662	None	-0.019512175	356
PRAD	FASLG	DNADamage	0.539298	None	-0.090208328	356
PRAD	FASLG	EMT	0.105837	None	0.370380638	356
PRAD	FASLG	Hormone AR	0.105837	None	-0.232513035	356
PRAD	FASLG	Hormone ER	0.00779405	Activation	0.18839674	356
PRAD	FASLG	PI3KAKT	0.000154532	Activation	0.982858417	356
PRAD	FASLG	RASMAPK	0.0162864	Activation	0.565779725	356
PRAD	FASLG	RTK	0.105837	None	0.269926355	356
PRAD	FASLG	TSCmTOR	0.000154532	Activation	0.774343944	356
PRAD	MLKL	Apoptosis	0.93903	None	0.006511618	197259
PRAD	MLKL	CellCycle	0.443514	None	0.094520034	197259
PRAD	MLKL	DNADamage	0.245103	None	-0.189585608	197259
PRAD	MLKL	EMT	0.00786483	Activation	0.652800196	197259
PRAD	MLKL	Hormone AR	0.00634761	Inhibition	-0.431694457	197259
PRAD	MLKL	Hormone ER	0.0368287	Activation	0.157362803	197259
PRAD	MLKL	PI3KAKT	0.814207	None	0.088658624	197259
PRAD	MLKL	RASMAPK	0.814207	None	-0.114930298	197259
PRAD	MLKL	RTK	0.320913	None	-0.200665674	197259
PRAD	MLKL	TSCmTOR	0.814207	None	0.064307559	197259
PRAD	RIPK1	Apoptosis	0.109734	None	-0.156014627	8737
PRAD	RIPK1	CellCycle	0.611962	None	-0.043138874	8737
PRAD	RIPK1	DNADamage	0.0607671	None	-0.247391733	8737
PRAD	RIPK1	EMT	0.466034	None	0.185149073	8737
PRAD	RIPK1	Hormone AR	0.611962	None	-0.070668479	8737
PRAD	RIPK1	Hormone ER	0.466034	None	0.05686275	8737
PRAD	RIPK1	PI3KAKT	0.0402468	Activation	0.570286883	8737
PRAD	RIPK1	RASMAPK	0.00469269	Activation	0.686289315	8737
PRAD	RIPK1	RTK	0.00403151	Activation	0.501936124	8737
PRAD	RIPK1	TSCmTOR	0.00573759	Activation	0.585367923	8737
PRAD	RIPK3	Apoptosis	0.0315097	Inhibition	-0.199180696	11035
PRAD	RIPK3	CellCycle	0.766837	None	0.02521909	11035
PRAD	RIPK3	DNADamage	0.371825	None	-0.119209344	11035
PRAD	RIPK3	EMT	0.00127913	Activation	0.789156008	11035
PRAD	RIPK3	Hormone AR	0.433311	None	-0.109267394	11035
PRAD	RIPK3	Hormone ER	0.0057307	Activation	0.200846527	11035
PRAD	RIPK3	PI3KAKT	0.0315097	Activation	0.573735116	11035
PRAD	RIPK3	RASMAPK	0.0315097	Activation	0.493456339	11035
PRAD	RIPK3	RTK	0.0315097	Activation	0.345119773	11035
PRAD	RIPK3	TSCmTOR	0.240936	None	0.259230394	11035
PRAD	TLR3	Apoptosis	0.0247077	Inhibition	-0.200960832	7098
PRAD	TLR3	CellCycle	0.00117497	Inhibition	-0.327500588	7098
PRAD	TLR3	DNADamage	0.0355707	Inhibition	-0.247114259	7098
PRAD	TLR3	EMT	0.295036	None	0.218764386	7098
PRAD	TLR3	Hormone AR	0.003992	Inhibition	-0.393307055	7098
PRAD	TLR3	Hormone ER	0.0247077	Activation	0.144614049	7098
PRAD	TLR3	PI3KAKT	0.00367499	Activation	0.751180773	7098
PRAD	TLR3	RASMAPK	0.00702813	Activation	0.59467615	7098
PRAD	TLR3	RTK	0.00261694	Activation	0.491866956	7098
PRAD	TLR3	TSCmTOR	0.00367499	Activation	0.605165665	7098
PRAD	TNF	Apoptosis	0.125596	None	-0.13484967	7124
PRAD	TNF	CellCycle	0.346577	None	0.080126751	7124
PRAD	TNF	DNADamage	0.0177915	Inhibition	-0.285455122	7124
PRAD	TNF	EMT	0.000138729	Activation	0.827844703	7124
PRAD	TNF	Hormone AR	0.0796341	None	-0.235740426	7124
PRAD	TNF	Hormone ER	0.00109467	Activation	0.210732221	7124
PRAD	TNF	PI3KAKT	0.000432973	Activation	0.872266608	7124
PRAD	TNF	RASMAPK	4.21847e-07	Activation	1.0978444	7124
PRAD	TNF	RTK	0.000109976	Activation	0.586967957	7124
PRAD	TNF	TSCmTOR	8.92545e-13	Activation	1.352689579	7124
READ	FADD	Apoptosis	0.966259	None	0.018517698	8772
READ	FADD	CellCycle	0.746693	None	0.530614893	8772
READ	FADD	DNADamage	0.746693	None	0.326104535	8772
READ	FADD	EMT	0.746693	None	-0.493278258	8772
READ	FADD	Hormone AR	0.746693	None	-0.166882398	8772
READ	FADD	Hormone ER	0.746693	None	-0.082983319	8772
READ	FADD	PI3KAKT	0.746693	None	0.247925028	8772
READ	FADD	RASMAPK	0.746693	None	-0.732164031	8772
READ	FADD	RTK	0.746693	None	-0.385855881	8772
READ	FADD	TSCmTOR	0.746693	None	0.170603245	8772
READ	FAS	Apoptosis	0.702064	None	-0.278004146	355
READ	FAS	CellCycle	0.496797	None	-0.47467003	355
READ	FAS	DNADamage	0.00535091	Inhibition	-1.264667011	355
READ	FAS	EMT	0.702064	None	0.258897082	355
READ	FAS	Hormone AR	0.496797	None	-0.476936426	355
READ	FAS	Hormone ER	0.702064	None	0.114912154	355
READ	FAS	PI3KAKT	0.702064	None	0.300581412	355
READ	FAS	RASMAPK	0.108048	None	1.272585987	355
READ	FAS	RTK	0.702064	None	0.132250352	355
READ	FAS	TSCmTOR	0.496797	None	0.396462657	355
READ	FASLG	Apoptosis	0.972481	None	0.60642912	356
READ	FASLG	CellCycle	0.972481	None	0.05979524	356
READ	FASLG	DNADamage	0.972481	None	-0.458466023	356
READ	FASLG	EMT	0.972481	None	0.158228129	356
READ	FASLG	Hormone AR	0.972481	None	-0.1779025	356
READ	FASLG	Hormone ER	0.972481	None	0.095238895	356
READ	FASLG	PI3KAKT	0.972481	None	0.385239316	356
READ	FASLG	RASMAPK	0.972481	None	0.136509643	356
READ	FASLG	RTK	0.972481	None	-0.141575306	356
READ	FASLG	TSCmTOR	0.972481	None	0.011089663	356
READ	MLKL	Apoptosis	0.875027	None	0.430195297	197259
READ	MLKL	CellCycle	0.875027	None	0.094509231	197259
READ	MLKL	DNADamage	0.875027	None	-0.327767029	197259
READ	MLKL	EMT	0.875027	None	0.311028894	197259
READ	MLKL	Hormone AR	0.875027	None	-0.141026674	197259
READ	MLKL	Hormone ER	0.875027	None	0.151287748	197259
READ	MLKL	PI3KAKT	0.875027	None	0.199860279	197259
READ	MLKL	RASMAPK	0.875027	None	0.089249365	197259
READ	MLKL	RTK	0.875027	None	-0.165096786	197259
READ	MLKL	TSCmTOR	0.875027	None	-0.061506938	197259
READ	RIPK1	Apoptosis	0.954189	None	0.11714967	8737
READ	RIPK1	CellCycle	0.954189	None	-0.213110436	8737
READ	RIPK1	DNADamage	0.410095	None	-0.760538797	8737
READ	RIPK1	EMT	0.954189	None	0.087696663	8737
READ	RIPK1	Hormone AR	0.954189	None	-0.022393035	8737
READ	RIPK1	Hormone ER	0.954189	None	0.082555325	8737
READ	RIPK1	PI3KAKT	0.954189	None	0.117407069	8737
READ	RIPK1	RASMAPK	0.954189	None	0.265625808	8737
READ	RIPK1	RTK	0.954189	None	0.286415775	8737
READ	RIPK1	TSCmTOR	0.954189	None	-0.034832103	8737
READ	RIPK3	Apoptosis	0.526669	None	0.619419052	11035
READ	RIPK3	CellCycle	0.118456	None	-1.017121128	11035
READ	RIPK3	DNADamage	0.942937	None	-0.027380916	11035
READ	RIPK3	EMT	0.727301	None	-0.524150492	11035
READ	RIPK3	Hormone AR	0.526669	None	0.627753258	11035
READ	RIPK3	Hormone ER	0.727301	None	0.140598998	11035
READ	RIPK3	PI3KAKT	0.704378	None	-0.615039753	11035
READ	RIPK3	RASMAPK	0.816348	None	-0.238296807	11035
READ	RIPK3	RTK	0.816348	None	0.115930984	11035
READ	RIPK3	TSCmTOR	0.727301	None	-0.211208835	11035
READ	TLR3	Apoptosis	0.282134	None	-0.832105318	7098
READ	TLR3	CellCycle	0.364153	None	-0.652273447	7098
READ	TLR3	DNADamage	0.282134	None	-0.723873724	7098
READ	TLR3	EMT	0.608283	None	-0.689829759	7098
READ	TLR3	Hormone AR	0.544641	None	-0.482654225	7098
READ	TLR3	Hormone ER	0.76725	None	-0.133355234	7098
READ	TLR3	PI3KAKT	0.931978	None	-0.048982003	7098
READ	TLR3	RASMAPK	0.931978	None	0.083180748	7098
READ	TLR3	RTK	0.878852	None	0.128971736	7098
READ	TLR3	TSCmTOR	0.859736	None	-0.166382319	7098
READ	TNF	Apoptosis	0.384686	None	-0.415068886	7124
READ	TNF	CellCycle	0.468356	None	-0.300671799	7124
READ	TNF	DNADamage	0.0197393	Inhibition	-0.952546943	7124
READ	TNF	EMT	0.101443	None	1.266517501	7124
READ	TNF	Hormone AR	0.101443	None	-0.68987631	7124
READ	TNF	Hormone ER	0.147641	None	0.294672923	7124
READ	TNF	PI3KAKT	0.0148934	Activation	1.743217181	7124
READ	TNF	RASMAPK	0.0148934	Activation	1.558954291	7124
READ	TNF	RTK	0.168	None	0.488802399	7124
READ	TNF	TSCmTOR	0.0148934	Activation	0.9228913	7124
SARC	FADD	Apoptosis	0.0141936	Activation	0.47484899	8772
SARC	FADD	CellCycle	0.479132	None	-0.249501425	8772
SARC	FADD	DNADamage	0.523362	None	0.181242676	8772
SARC	FADD	EMT	0.00108313	Activation	0.753133233	8772
SARC	FADD	Hormone AR	0.0866651	None	-0.466133874	8772
SARC	FADD	Hormone ER	0.847169	None	0.029666023	8772
SARC	FADD	PI3KAKT	0.000762584	Inhibition	-1.502357876	8772
SARC	FADD	RASMAPK	0.523362	None	-0.182713254	8772
SARC	FADD	RTK	0.523362	None	0.182208105	8772
SARC	FADD	TSCmTOR	0.137371	None	0.403714349	8772
SARC	FAS	Apoptosis	0.240201	None	0.24336691	355
SARC	FAS	CellCycle	0.754884	None	0.084303692	355
SARC	FAS	DNADamage	0.442616	None	0.253976938	355
SARC	FAS	EMT	0.0755712	None	0.462386767	355
SARC	FAS	Hormone AR	0.0696824	None	0.592238006	355
SARC	FAS	Hormone ER	0.0755712	None	0.347783803	355
SARC	FAS	PI3KAKT	0.754884	None	-0.120032468	355
SARC	FAS	RASMAPK	0.240201	None	0.371348364	355
SARC	FAS	RTK	0.754884	None	0.080100437	355
SARC	FAS	TSCmTOR	0.227959	None	-0.375538774	355
SARC	FASLG	Apoptosis	0.0644624	None	0.39054738	356
SARC	FASLG	CellCycle	0.0317907	Inhibition	-0.683899796	356
SARC	FASLG	DNADamage	0.0846141	None	-0.525197875	356
SARC	FASLG	EMT	0.863264	None	0.034920426	356
SARC	FASLG	Hormone AR	0.121013	None	-0.413639115	356
SARC	FASLG	Hormone ER	0.0369398	Activation	0.405801023	356
SARC	FASLG	PI3KAKT	0.197228	None	-0.566426784	356
SARC	FASLG	RASMAPK	0.36404	None	0.254191546	356
SARC	FASLG	RTK	0.173847	None	0.359324503	356
SARC	FASLG	TSCmTOR	0.443161	None	0.187879464	356
SARC	MLKL	Apoptosis	1.68081e-06	Activation	0.858939955	197259
SARC	MLKL	CellCycle	0.000158981	Inhibition	-0.941211219	197259
SARC	MLKL	DNADamage	0.444568	None	-0.234836763	197259
SARC	MLKL	EMT	0.0625244	None	0.42944282	197259
SARC	MLKL	Hormone AR	0.000449393	Inhibition	-0.837301213	197259
SARC	MLKL	Hormone ER	0.896191	None	0.038722705	197259
SARC	MLKL	PI3KAKT	0.000158981	Inhibition	-1.574455117	197259
SARC	MLKL	RASMAPK	0.896191	None	0.031366594	197259
SARC	MLKL	RTK	0.323615	None	0.267540829	197259
SARC	MLKL	TSCmTOR	0.0550807	None	-0.496177567	197259
SARC	RIPK1	Apoptosis	0.435842	None	0.156840524	8737
SARC	RIPK1	CellCycle	0.382294	None	-0.259261596	8737
SARC	RIPK1	DNADamage	0.380658	None	-0.333449593	8737
SARC	RIPK1	EMT	0.776721	None	-0.078718197	8737
SARC	RIPK1	Hormone AR	0.0211242	Inhibition	-0.674723763	8737
SARC	RIPK1	Hormone ER	0.380658	None	-0.184142976	8737
SARC	RIPK1	PI3KAKT	0.954524	None	-0.021905586	8737
SARC	RIPK1	RASMAPK	0.232583	None	0.435568441	8737
SARC	RIPK1	RTK	0.0303313	Activation	0.602937755	8737
SARC	RIPK1	TSCmTOR	0.380658	None	0.288908252	8737
SARC	RIPK3	Apoptosis	0.000289271	Activation	0.646614707	11035
SARC	RIPK3	CellCycle	1.0865e-05	Inhibition	-1.111537897	11035
SARC	RIPK3	DNADamage	0.790158	None	-0.066523233	11035
SARC	RIPK3	EMT	0.0649706	None	0.419071687	11035
SARC	RIPK3	Hormone AR	0.00105776	Inhibition	-0.77339331	11035
SARC	RIPK3	Hormone ER	0.707853	None	0.072440448	11035
SARC	RIPK3	PI3KAKT	0.000113568	Inhibition	-1.595758035	11035
SARC	RIPK3	RASMAPK	0.439193	None	0.224216288	11035
SARC	RIPK3	RTK	0.0144739	Activation	0.589536072	11035
SARC	RIPK3	TSCmTOR	0.0983579	None	-0.404720217	11035
SARC	TLR3	Apoptosis	0.623927	None	-0.082230764	7098
SARC	TLR3	CellCycle	0.222447	None	-0.390706672	7098
SARC	TLR3	DNADamage	0.115326	None	-0.524531638	7098
SARC	TLR3	EMT	0.373715	None	-0.206498004	7098
SARC	TLR3	Hormone AR	0.307451	None	-0.293637471	7098
SARC	TLR3	Hormone ER	0.222447	None	0.24357871	7098
SARC	TLR3	PI3KAKT	0.373715	None	0.368985489	7098
SARC	TLR3	RASMAPK	0.0676599	None	0.59167499	7098
SARC	TLR3	RTK	0.0676599	None	0.5655188	7098
SARC	TLR3	TSCmTOR	0.373715	None	-0.231701465	7098
SARC	TNF	Apoptosis	0.202692	None	0.233622758	7124
SARC	TNF	CellCycle	0.0821222	None	-0.486972902	7124
SARC	TNF	DNADamage	0.0821222	None	-0.55529665	7124
SARC	TNF	EMT	0.717867	None	-0.073581489	7124
SARC	TNF	Hormone AR	0.0821222	None	-0.569317766	7124
SARC	TNF	Hormone ER	0.188603	None	0.229987478	7124
SARC	TNF	PI3KAKT	0.0821222	None	-0.78158567	7124
SARC	TNF	RASMAPK	0.675044	None	0.123704791	7124
SARC	TNF	RTK	0.0971977	None	0.417434292	7124
SARC	TNF	TSCmTOR	0.0821222	None	0.47614396	7124
SKCM	FADD	Apoptosis	0.721987	None	-0.13211143	8772
SKCM	FADD	CellCycle	0.295019	None	0.532983285	8772
SKCM	FADD	DNADamage	0.721987	None	-0.165148697	8772
SKCM	FADD	EMT	0.370583	None	-0.498874626	8772
SKCM	FADD	Hormone AR	0.370583	None	-0.404766371	8772
SKCM	FADD	Hormone ER	0.721987	None	0.049180877	8772
SKCM	FADD	PI3KAKT	0.721987	None	0.316586679	8772
SKCM	FADD	RASMAPK	0.435817	None	0.406478872	8772
SKCM	FADD	RTK	0.515269	None	0.238674182	8772
SKCM	FADD	TSCmTOR	0.231868	None	0.764852912	8772
SKCM	FAS	Apoptosis	0.411693	None	0.403244162	355
SKCM	FAS	CellCycle	0.568462	None	-0.224701289	355
SKCM	FAS	DNADamage	0.411693	None	-0.303148973	355
SKCM	FAS	EMT	0.411693	None	0.447931881	355
SKCM	FAS	Hormone AR	0.411693	None	-0.395191531	355
SKCM	FAS	Hormone ER	0.568462	None	0.103332638	355
SKCM	FAS	PI3KAKT	0.35408	None	1.205962612	355
SKCM	FAS	RASMAPK	0.902392	None	0.040481179	355
SKCM	FAS	RTK	0.411693	None	0.278790495	355
SKCM	FAS	TSCmTOR	0.620462	None	-0.198043746	355
SKCM	FASLG	Apoptosis	0.0571762	None	0.8950439	356
SKCM	FASLG	CellCycle	0.968262	None	-0.037714339	356
SKCM	FASLG	DNADamage	0.968262	None	-0.106097701	356
SKCM	FASLG	EMT	0.275485	None	0.600151542	356
SKCM	FASLG	Hormone AR	0.968262	None	-0.054372369	356
SKCM	FASLG	Hormone ER	0.275485	None	0.218259737	356
SKCM	FASLG	PI3KAKT	0.275485	None	-0.947282858	356
SKCM	FASLG	RASMAPK	0.968262	None	-0.051366156	356
SKCM	FASLG	RTK	0.79072	None	-0.199152584	356
SKCM	FASLG	TSCmTOR	0.968262	None	-0.013601496	356
SKCM	MLKL	Apoptosis	0.171272	None	0.634562263	197259
SKCM	MLKL	CellCycle	0.66795	None	0.126936177	197259
SKCM	MLKL	DNADamage	0.495119	None	-0.346012885	197259
SKCM	MLKL	EMT	0.542448	None	0.374790337	197259
SKCM	MLKL	Hormone AR	0.113636	None	-0.657961355	197259
SKCM	MLKL	Hormone ER	0.171272	None	0.275018853	197259
SKCM	MLKL	PI3KAKT	0.66795	None	0.403186589	197259
SKCM	MLKL	RASMAPK	0.542448	None	0.325889574	197259
SKCM	MLKL	RTK	0.66795	None	-0.110304907	197259
SKCM	MLKL	TSCmTOR	0.66795	None	0.144643465	197259
SKCM	RIPK1	Apoptosis	0.934307	None	-0.0545246	8737
SKCM	RIPK1	CellCycle	0.265415	None	0.494835056	8737
SKCM	RIPK1	DNADamage	0.934307	None	-0.021593973	8737
SKCM	RIPK1	EMT	0.934307	None	-0.059166414	8737
SKCM	RIPK1	Hormone AR	0.823615	None	-0.189185071	8737
SKCM	RIPK1	Hormone ER	0.0832983	None	-0.326547681	8737
SKCM	RIPK1	PI3KAKT	0.889529	None	0.284297851	8737
SKCM	RIPK1	RASMAPK	0.823615	None	0.22483497	8737
SKCM	RIPK1	RTK	0.323482	None	0.351422202	8737
SKCM	RIPK1	TSCmTOR	0.0832983	None	0.83814086	8737
SKCM	RIPK3	Apoptosis	0.0347646	Activation	0.941157399	11035
SKCM	RIPK3	CellCycle	0.726062	None	-0.155520808	11035
SKCM	RIPK3	DNADamage	0.595956	None	-0.21601144	11035
SKCM	RIPK3	EMT	0.332289	None	0.519470538	11035
SKCM	RIPK3	Hormone AR	0.503706	None	-0.300372141	11035
SKCM	RIPK3	Hormone ER	0.158066	None	0.290772724	11035
SKCM	RIPK3	PI3KAKT	0.556991	None	-0.565651142	11035
SKCM	RIPK3	RASMAPK	0.332173	None	0.550197012	11035
SKCM	RIPK3	RTK	0.928041	None	-0.020915331	11035
SKCM	RIPK3	TSCmTOR	0.885803	None	0.087354629	11035
SKCM	TLR3	Apoptosis	0.618047	None	0.475175661	7098
SKCM	TLR3	CellCycle	0.618047	None	-0.249454088	7098
SKCM	TLR3	DNADamage	0.618047	None	-0.241734542	7098
SKCM	TLR3	EMT	0.826995	None	0.113238964	7098
SKCM	TLR3	Hormone AR	0.618047	None	0.210923063	7098
SKCM	TLR3	Hormone ER	0.618047	None	0.108665063	7098
SKCM	TLR3	PI3KAKT	0.618047	None	0.478294895	7098
SKCM	TLR3	RASMAPK	0.618047	None	-0.315418116	7098
SKCM	TLR3	RTK	0.666655	None	0.145984299	7098
SKCM	TLR3	TSCmTOR	0.912372	None	-0.036944891	7098
SKCM	TNF	Apoptosis	0.0988831	None	0.767188355	7124
SKCM	TNF	CellCycle	0.676386	None	-0.172188878	7124
SKCM	TNF	DNADamage	0.539894	None	-0.286902848	7124
SKCM	TNF	EMT	0.395445	None	0.490501662	7124
SKCM	TNF	Hormone AR	0.395445	None	-0.381928767	7124
SKCM	TNF	Hormone ER	0.0541171	None	0.382896985	7124
SKCM	TNF	PI3KAKT	0.720789	None	-0.213212959	7124
SKCM	TNF	RASMAPK	0.539894	None	0.329461854	7124
SKCM	TNF	RTK	0.553519	None	0.205138957	7124
[truncated: 561 more rows]
