# Supplementary material for: Multi-omics analysis reveals the panoramic picture of necroptosis-related regulators in pan-cancer
Source: Aging (Albany NY). 2022 Jun 21;14(12):5034–58. doi: 10.18632/aging.204124 (PMC9271292; doi:10.18632/aging.204124)
Supplement: Supplementary Material 8 [file aging-14-204124-s008.xlsx]

## Sheet: SheetName
symbol	drug	cor	fdr	entrez
FADD	16-beta-bromoandrosterone	0.146515	0.00119789	8772
FADD	1S,3R-RSL-3	0.151778	9.1478e-05	8772
FADD	3-Cl-AHPC	0.156752	3.5476e-05	8772
FADD	968	-0.0116338	0.99849	8772
FADD	A-804598	0.0149509	0.946089	8772
FADD	AA-COCF3	0.144471	0.000382145	8772
FADD	ABT-199	0.204338	8.1153e-05	8772
FADD	ABT-737	0.225669	3.40907e-08	8772
FADD	AC55649	0.0281843	0.842837	8772
FADD	AGK-2	0.0176862	0.968515	8772
FADD	AM-580	0.0527752	0.317676	8772
FADD	AT-406	0.0880622	0.355792	8772
FADD	AT13387	0.126223	0.0307434	8772
FADD	AT7867	0.241881	2.75781e-10	8772
FADD	AZ-3146	0.178327	6.51781e-06	8772
FADD	AZD1480	0.185298	0.00403392	8772
FADD	AZD4547	0.144256	0.000817658	8772
FADD	AZD6482	0.060555	0.284697	8772
FADD	AZD7545	0.0527433	0.236364	8772
FADD	AZD7762	0.15355	4.7123e-05	8772
FADD	AZD8055	0.123412	0.00179171	8772
FADD	B02	0.238101	7.14306e-10	8772
FADD	BCL-LZH-4	0.00669756	0.984203	8772
FADD	BEC	-0.00963206	0.999979	8772
FADD	BI-2536	0.27013	5.85145e-14	8772
FADD	BIBR-1532	0.114217	0.0081351	8772
FADD	BIRB-796	0.148671	0.000502767	8772
FADD	BIX-01294	0.249031	2.74613e-11	8772
FADD	BMS-195614	0.066502	0.263055	8772
FADD	BMS-270394	0.0830946	0.0616732	8772
FADD	BMS-345541	0.20775	5.37968e-08	8772
FADD	BMS-536924	0.0320319	0.589045	8772
FADD	BMS-754807	0.168369	3.5489e-05	8772
FADD	BRD-A02303741	0.0972401	0.0547386	8772
FADD	BRD-A05715709	-0.0682223	0.642097	8772
FADD	BRD-A71883111	0.136796	0.000890798	8772
FADD	BRD-A86708339	0.197491	0.000629329	8772
FADD	BRD-A94377914	0.259061	9.1611e-07	8772
FADD	BRD-K01737880	0.381945	0.0236968	8772
FADD	BRD-K02251932	0.0769447	0.119772	8772
FADD	BRD-K02492147	-0.0962493	0.0840881	8772
FADD	BRD-K04800985	-0.00181538	0.999785	8772
FADD	BRD-K09344309	0.135279	0.735742	8772
FADD	BRD-K09587429	-0.0206749	0.785783	8772
FADD	BRD-K11533227	0.167309	5.755e-05	8772
FADD	BRD-K13999467	0.155817	0.0001278	8772
FADD	BRD-K14844214	0.0308767	0.706488	8772
FADD	BRD-K16147474	-0.00513595	0.99263	8772
FADD	BRD-K17060750	-0.074919	0.125183	8772
FADD	BRD-K19103580	0.0599515	0.228092	8772
FADD	BRD-K24690302	0.178479	8.8051e-06	8772
FADD	BRD-K26531177	0.237125	1.32836e-09	8772
FADD	BRD-K27224038	0.11794	0.592927	8772
FADD	BRD-K27986637	0.0526063	0.765761	8772
FADD	BRD-K28456706	0.248941	2.0744e-10	8772
FADD	BRD-K29086754	0.124483	0.476793	8772
FADD	BRD-K29313308	0.18214	6.18215e-06	8772
FADD	BRD-K30019337	0.201832	0.302387	8772
FADD	BRD-K30748066	0.321114	0.0495845	8772
FADD	BRD-K33199242	0.00583148	0.993616	8772
FADD	BRD-K33514849	0.0891195	0.999288	8772
FADD	BRD-K34099515	0.122052	0.843996	8772
FADD	BRD-K34222889	0.299579	2.08178e-16	8772
FADD	BRD-K34485477	0.130209	0.998562	8772
FADD	BRD-K35604418	0.210652	3.70787e-08	8772
FADD	BRD-K37390332	0.0636733	0.697003	8772
FADD	BRD-K41334119	0.0758925	0.900478	8772
FADD	BRD-K41597374	0.142783	0.000253295	8772
FADD	BRD-K42260513	0.00111162	0.998533	8772
FADD	BRD-K44224150	0.0741053	0.980541	8772
FADD	BRD-K45681478	0.152373	0.000287279	8772
FADD	BRD-K48334597	0.148758	0.155828	8772
FADD	BRD-K48477130	0.0328376	0.880857	8772
FADD	BRD-K49290616	-0.00534712	0.995178	8772
FADD	BRD-K50799972	0.0627784	0.355247	8772
FADD	BRD-K51490254	0.228962	1.78959e-08	8772
FADD	BRD-K51831558	0.087573	0.211012	8772
FADD	BRD-K52037352	0.0313433	0.656013	8772
FADD	BRD-K55116708	0.125415	0.00325228	8772
FADD	BRD-K61166597	0.22198	9.26054e-09	8772
FADD	BRD-K63431240	0.0808551	0.0582727	8772
FADD	BRD-K64610608	0.0378322	0.756909	8772
FADD	BRD-K66453893	0.269872	2.17077e-13	8772
FADD	BRD-K66532283	0.198368	3.54324e-07	8772
FADD	BRD-K70511574	0.293296	1.13246e-15	8772
FADD	BRD-K71781559	-0.059	0.959041	8772
FADD	BRD-K75293299	0.0134724	0.970174	8772
FADD	BRD-K78574327	0.0853607	0.968985	8772
FADD	BRD-K80183349	0.187981	8.76369e-07	8772
FADD	BRD-K84807411	0.161309	0.470301	8772
FADD	BRD-K85133207	0.147246	0.000466444	8772
FADD	BRD-K86535717	-0.0951147	0.749019	8772
FADD	BRD-K88742110	0.233861	2.89238e-09	8772
FADD	BRD-K90370028	0.0946802	0.781282	8772
FADD	BRD-K92856060	0.171682	1.5779e-05	8772
FADD	BRD-K96431673	-0.0768354	0.985799	8772
FADD	BRD-K96970199	-0.0220223	0.998764	8772
FADD	BRD-K97651142	0.131905	0.0011799	8772
FADD	BRD-K99006945	-0.0515698	0.497101	8772
FADD	BRD-M00053801	0.118962	0.158351	8772
FADD	BRD1378	0.0610686	0.523889	8772
FADD	BRD1812	0.208969	5.41048e-08	8772
FADD	BRD1835	0.0749449	0.109484	8772
FADD	BRD4132	0.0293358	0.670867	8772
FADD	BRD5468	0.0191953	0.86285	8772
FADD	BRD6340	0.162189	3.1234e-05	8772
FADD	BRD8899	0.0111196	0.93396	8772
FADD	BRD8958	0.0661654	0.982209	8772
FADD	BRD9647	0.0708351	0.153604	8772
FADD	BRD9876	0.0892887	0.123681	8772
FADD	BYL-719	0.0790412	0.215715	8772
FADD	Bax channel blocker	0.190301	4.61108e-06	8772
FADD	C6-ceramide	0.00341353	0.983151	8772
FADD	CAL-101	0.0496507	0.418726	8772
FADD	CAY10576	-0.0507793	0.485338	8772
FADD	CAY10594	0.0364694	0.561954	8772
FADD	CAY10618	0.179624	2.0976e-06	8772
FADD	CBB-1007	-0.0102208	0.968847	8772
FADD	CCT036477	0.273917	1.52773e-13	8772
FADD	CD-1530	0.0276753	0.656057	8772
FADD	CD-437	0.228254	7.95481e-10	8772
FADD	CHIR-99021	0.140391	0.000519036	8772
FADD	CHM-1	0.283183	8.04272e-15	8772
FADD	CI-976	-0.0407142	0.787593	8772
FADD	CID-5951923	-0.0447002	0.612331	8772
FADD	CIL41	0.0991722	0.144636	8772
FADD	CIL55	0.14691	0.466739	8772
FADD	CIL55A	0.148814	0.0105505	8772
FADD	CIL56	0.0671429	0.282007	8772
FADD	CIL70	0.237934	1.0443e-05	8772
FADD	COL-3	0.200015	6.97892e-06	8772
FADD	CR-1-31B	0.268456	1.35568e-13	8772
FADD	Ch-55	0.122179	0.00546559	8772
FADD	Compound 1541A	0.106817	0.0477136	8772
FADD	Compound 23 citrate	0.243934	1.22359e-10	8772
FADD	Compound 7d-cis	0.302793	6.8889e-14	8772
FADD	DBeQ	0.217095	8.36881e-08	8772
FADD	DNMDP	-0.0951384	0.150192	8772
FADD	ELCPK	0.32153	6.24352e-09	8772
FADD	ETP-46464	0.13969	0.00563914	8772
FADD	EX-527	0.0892154	0.380559	8772
FADD	FGIN-1-27	-0.0999365	0.421333	8772
FADD	FQI-1	0.240582	5.28791e-06	8772
FADD	FQI-2	0.27941	1.2581e-14	8772
FADD	FSC231	0.107149	0.99945	8772
FADD	GANT-61	0.101777	0.0521497	8772
FADD	GDC-0879	-0.00426379	0.957178	8772
FADD	GDC-0941	0.119442	0.00494609	8772
FADD	GMX-1778	0.169703	1.2874e-05	8772
FADD	GSK-3 inhibitor IX	0.0956758	0.0226516	8772
FADD	GSK-J4	0.412482	0.00362519	8772
FADD	GSK1059615	0.0347283	0.915294	8772
FADD	GSK2636771	0.0354661	0.744568	8772
FADD	GSK4112	0.0757446	0.111317	8772
FADD	GSK461364	0.288606	3.64782e-15	8772
FADD	GSK525762A	0.191158	2.65107e-07	8772
FADD	GW-405833	0.17987	1.92787e-06	8772
FADD	GW-843682X	0.205913	1.41102e-07	8772
FADD	HBX-41108	0.115669	0.0275914	8772
FADD	HC-067047	0.0533692	0.382729	8772
FADD	HLI 373	0.22903	4.46217e-09	8772
FADD	I-BET151	0.201916	4.16322e-08	8772
FADD	IC-87114	-0.0835793	0.15426	8772
FADD	IPR-456	-0.00456888	0.983319	8772
FADD	ISOX	0.276339	5.86819e-14	8772
FADD	IU1	0.0476647	0.604653	8772
FADD	JQ-1	0.265697	3.45709e-13	8772
FADD	JW-480	0.0951191	0.607329	8772
FADD	JW-55	-0.0536853	0.697048	8772
FADD	JW-74	0.0480063	0.598418	8772
FADD	KH-CB19	-0.00228097	0.987463	8772
FADD	KHS101	0.140702	0.000595239	8772
FADD	KPT185	0.308253	5.37662e-13	8772
FADD	KU 0060648	0.178458	4.30241e-06	8772
FADD	KU-0063794	0.160034	5.6586e-05	8772
FADD	KU-55933	0.119787	0.00403994	8772
FADD	KU-60019	0.168927	9.73729e-06	8772
FADD	KW-2449	0.241283	5.64928e-11	8772
FADD	KX2-391	0.27865	3.92595e-14	8772
FADD	Ki8751	0.180788	7.98747e-06	8772
FADD	Ko-143	0.18883	9.8758e-07	8772
FADD	L-685458	0.0217099	0.7648	8772
FADD	LE-135	0.0842287	0.0513476	8772
FADD	LRRK2-IN-1	0.305087	2.56954e-12	8772
FADD	LY-2157299	-0.180755	0.3584	8772
FADD	LY-2183240	0.304753	3.99268e-17	8772
FADD	MG-132	0.175123	0.0191651	8772
FADD	MGCD-265	0.190695	5.04222e-07	8772
FADD	MI-1	-0.0600969	0.444407	8772
FADD	MI-2	0.180257	0.00415549	8772
FADD	MK-0752	-0.0533074	0.459681	8772
FADD	MK-1775	0.33519	1.03203e-19	8772
FADD	MK-2206	0.19138	3.02585e-06	8772
FADD	ML006	0.0486245	0.369346	8772
FADD	ML029	0.127658	0.00251808	8772
FADD	ML031	0.180291	1.4883e-05	8772
FADD	ML050	0.137418	0.000814479	8772
FADD	ML083	-0.0470613	0.693115	8772
FADD	ML162	0.167212	2.1227e-05	8772
FADD	ML203	0.106651	0.0338643	8772
FADD	ML210	0.190989	9.84589e-07	8772
FADD	ML239	0.19103	1.1674e-06	8772
FADD	ML258	0.0669129	0.500652	8772
FADD	ML311	0.249286	7.41655e-12	8772
FADD	ML312	-0.0782926	0.962086	8772
FADD	ML320	0.102341	0.0202832	8772
FADD	ML334 diastereomer	-0.0208338	0.8144	8772
FADD	MLN2238	0.192582	4.18725e-07	8772
FADD	MLN2480	0.117307	0.173515	8772
FADD	MST-312	0.257965	5.30815e-12	8772
FADD	Mdivi-1	0.149559	0.000204194	8772
FADD	Merck60	0.235797	1.497e-10	8772
FADD	N9-isopropylolomoucine	0.161452	4.7029e-05	8772
FADD	NPC-26	-0.00786113	0.96646	8772
FADD	NSC 74859	0.0599004	0.245696	8772
FADD	NSC19630	0.242545	9.8516e-08	8772
FADD	NSC23766	0.161182	4.0135e-05	8772
FADD	NSC30930	-0.0506928	0.467218	8772
FADD	NSC48300	0.226664	1.33125e-09	8772
FADD	NSC632839	0.245757	3.11939e-11	8772
FADD	NSC95397	0.275999	1.82066e-12	8772
FADD	NVP-231	0.222236	2.70548e-09	8772
FADD	NVP-ADW742	0.147516	0.000368122	8772
FADD	NVP-BEZ235	0.193467	4.8345e-05	8772
FADD	NVP-BSK805	0.204109	8.56527e-08	8772
FADD	NVP-TAE684	0.114102	0.0092335	8772
FADD	O-6-benzylguanine	0.0456299	0.744502	8772
FADD	OSI-027	0.155642	0.000104878	8772
FADD	OSI-930	0.193969	4.42805e-06	8772
FADD	PAC-1	0.238046	4.80607e-10	8772
FADD	PD 153035	-0.107691	0.0460257	8772
FADD	PD318088	-0.0803223	0.0783268	8772
FADD	PDMP	0.173828	1.7262e-05	8772
FADD	PF-184	0.238581	2.81126e-10	8772
FADD	PF-3758309	0.243009	7.60752e-06	8772
FADD	PF-4800567 hydrochloride	0.00759498	0.999586	8772
FADD	PF-543	0.083111	0.0680496	8772
FADD	PF-573228	0.189424	6.43371e-07	8772
FADD	PF-750	0.0711813	0.13252	8772
FADD	PHA-793887	0.236537	1.07462e-10	8772
FADD	PI-103	0.20357	1.8525e-07	8772
FADD	PIK-93	0.163199	4.1213e-05	8772
FADD	PL-DI	0.323258	1.02725e-18	8772
FADD	PLX-4720	-0.00623892	0.954182	8772
FADD	PRIMA-1	0.303945	6.29024e-16	8772
FADD	PRIMA-1-Met	0.163434	0.0105842	8772
FADD	PRL-3 inhibitor I	0.0147639	0.930004	8772
FADD	PX-12	0.327826	2.42402e-19	8772
FADD	PYR-41	0.107284	0.0314397	8772
FADD	QS-11	0.0622662	0.826731	8772
FADD	QW-BI-011	0.227236	0.00647902	8772
FADD	R428	0.204881	1.473e-05	8772
FADD	RAF265	0.0844505	0.111679	8772
FADD	RG-108	0.120262	0.00412201	8772
FADD	RITA	0.234521	1.80596e-09	8772
FADD	RO4929097	0.0498806	0.53038	8772
FADD	Repligen 136	0.212194	1.50731e-07	8772
FADD	SB-225002	0.29768	1.14275e-16	8772
FADD	SB-431542	-0.0442428	0.66519	8772
FADD	SB-525334	0.109343	0.0181289	8772
FADD	SB-743921	0.281286	4.97807e-15	8772
FADD	SCH-529074	0.187308	1.2731e-05	8772
FADD	SCH-79797	0.233427	4.00415e-10	8772
FADD	SGX-523	-0.0236954	0.735758	8772
FADD	SID 26681509	0.125662	0.00376269	8772
FADD	SJ-172550	0.044028	0.696528	8772
FADD	SKI-II	0.161883	9.1638e-05	8772
FADD	SMER-3	0.144828	0.000809257	8772
FADD	SN-38	0.211244	3.97172e-07	8772
FADD	SNS-032	0.16551	3.6975e-05	8772
FADD	SNX-2112	0.178094	1.42652e-06	8772
FADD	SR-II-138A	0.272289	3.35273e-14	8772
FADD	SR1001	0.0632104	0.344243	8772
FADD	SR8278	-0.0310707	0.941627	8772
FADD	SRT-1720	0.154326	0.000243543	8772
FADD	STF-31	0.165777	2.1131e-05	8772
FADD	SU11274	0.137859	0.000486215	8772
FADD	SZ4TA2	0.0415032	0.751031	8772
FADD	StemRegenin 1	0.149352	0.000138045	8772
FADD	TG-100-115	0.0756281	0.125703	8772
FADD	TG-101348	0.183345	2.03411e-06	8772
FADD	TGX-221	0.0457257	0.539946	8772
FADD	TPCA-1	0.197934	1.60471e-07	8772
FADD	TW-37	0.140622	0.000391438	8772
FADD	UNC0321	-0.0552246	0.592663	8772
FADD	UNC0638	0.147245	0.000277741	8772
FADD	VAF-347	-0.0808096	0.190605	8772
FADD	VER-155008	0.0425084	0.336568	8772
FADD	VU0155056	-0.0512662	0.863365	8772
FADD	WAY-362450	0.00646228	0.998521	8772
FADD	WP1130	0.215547	2.24842e-08	8772
FADD	WZ4002	0.103341	0.102246	8772
FADD	WZ8040	0.0572878	0.269741	8772
FADD	XL765	0.115746	0.0220603	8772
FADD	YK 4-279	0.319806	8.10479e-19	8772
FADD	YM-155	0.103578	0.0239895	8772
FADD	ZSTK474	0.117763	0.0171434	8772
FADD	abiraterone	-0.0664919	0.650338	8772
FADD	afatinib	-0.0319226	0.539561	8772
FADD	alisertib	0.237463	1.83065e-10	8772
FADD	alvocidib	0.25577	4.07624e-06	8772
FADD	apicidin	0.272336	6.28373e-14	8772
FADD	austocystin D	0.0397459	0.428887	8772
FADD	avicin D	-0.0152828	0.90021	8772
FADD	avrainvillamide	0.247424	5.33603e-08	8772
FADD	axitinib	0.286535	6.48007e-15	8772
FADD	azacitidine	0.0706517	0.134983	8772
FADD	bafilomycin A1	0.0796451	0.895615	8772
FADD	barasertib	0.289347	6.10515e-15	8772
FADD	bardoxolone methyl	0.197254	1.16339e-06	8772
FADD	belinostat	0.325431	6.59027e-10	8772
FADD	bendamustine	0.170173	3.7246e-05	8772
FADD	betulinic acid	-0.0750884	0.608201	8772
FADD	bexarotene	0.139951	0.000803472	8772
FADD	birinapant	-0.0610388	0.325669	8772
FADD	blebbistatin	-0.104589	0.889823	8772
FADD	bleomycin A2	0.0314981	0.610877	8772
FADD	bortezomib	0.247505	7.24048e-11	8772
FADD	bosutinib	0.0557942	0.186412	8772
FADD	brefeldin A	0.15716	0.000187449	8772
FADD	brivanib	0.13168	0.000944512	8772
FADD	cabozantinib	0.125792	0.00452189	8772
FADD	canertinib	-0.00168849	0.978296	8772
FADD	cediranib	0.100361	0.342051	8772
FADD	ceranib-2	0.32329	2.06908e-19	8772
FADD	cerulenin	0.256633	5.32366e-12	8772
FADD	chlorambucil	0.248671	3.1895e-11	8772
FADD	ciclopirox	0.255702	2.18729e-12	8772
FADD	ciclosporin	0.0579361	0.288205	8772
FADD	cimetidine	0.0633153	0.960458	8772
FADD	clofarabine	0.223526	9.29349e-10	8772
FADD	crizotinib	0.24844	2.79809e-11	8772
FADD	cucurbitacin I	0.34451	6.56649e-20	8772
FADD	curcumin	0.254966	6.66296e-12	8772
FADD	cyanoquinoline 11	0.0431384	0.664112	8772
FADD	cyclophosphamide	-0.0714735	0.993392	8772
FADD	cytarabine hydrochloride	0.261809	6.89212e-13	8772
FADD	cytochalasin B	0.0693003	0.166668	8772
FADD	dabrafenib	0.0381672	0.650507	8772
FADD	dacarbazine	0.179632	2.29189e-06	8772
FADD	daporinad	0.187406	7.68896e-06	8772
FADD	darinaparsin	0.170447	0.00414003	8772
FADD	dasatinib	-0.120583	0.00452559	8772
FADD	decitabine	0.196024	1.09276e-07	8772
FADD	dexamethasone	0.102938	0.013606	8772
FADD	dinaciclib	0.302309	2.01672e-08	8772
FADD	docetaxel	0.222038	9.9934e-05	8772
FADD	doxorubicin	0.299331	6.29732e-17	8772
FADD	elocalcitol	0.119839	0.00200254	8772
FADD	entinostat	0.30251	2.35386e-16	8772
FADD	epigallocatechin-3-monogallate	0.159878	0.00016076	8772
FADD	erastin	0.123015	0.00249679	8772
FADD	erismodegib	-0.0249472	0.790359	8772
FADD	erlotinib	-0.0495978	0.291892	8772
FADD	etomoxir	0.00890526	0.991449	8772
FADD	etoposide	0.273409	7.02608e-14	8772
FADD	fingolimod	0.211068	3.21636e-08	8772
FADD	fluorouracil	0.174636	4.16356e-06	8772
FADD	fluvastatin	0.0280305	0.640102	8772
FADD	foretinib	0.220256	2.02117e-08	8772
FADD	fulvestrant	0.100845	0.76928	8772
FADD	fumonisin B1	0.00734001	0.933144	8772
FADD	gefitinib	-0.0416392	0.448549	8772
FADD	gemcitabine	0.258296	1.85613e-11	8772
FADD	gossypol	0.233436	1.6297e-09	8772
FADD	hyperforin	-0.000185133	0.999082	8772
FADD	ibrutinib	0.0459466	0.461187	8772
FADD	ifosfamide	-0.0482493	0.821212	8772
FADD	imatinib	0.0965811	0.0207738	8772
FADD	importazole	0.0452622	0.482292	8772
FADD	indisulam	0.248015	6.9838e-11	8772
FADD	isoevodiamine	0.314318	4.72423e-18	8772
FADD	isoliquiritigenin	0.232788	0.00443719	8772
FADD	isonicotinohydroxamic acid	0.0304833	0.992739	8772
FADD	istradefylline	0.118974	0.382546	8772
FADD	itraconazole	0.122659	0.0468246	8772
FADD	lapatinib	-0.0156623	0.765032	8772
FADD	lenvatinib	0.144077	0.000457335	8772
FADD	leptomycin B	0.207679	1.19257e-08	8772
FADD	linifanib	0.142482	0.000192243	8772
FADD	linsitinib	0.127102	0.00212052	8772
FADD	lomeguatrib	0.085246	0.107368	8772
FADD	lovastatin	-0.0117981	0.854949	8772
FADD	manumycin A	0.222178	2.11278e-09	8772
FADD	marinopyrrole A	0.223631	4.00138e-06	8772
FADD	masitinib	0.211997	6.71012e-08	8772
FADD	methotrexate	0.045744	0.286874	8772
FADD	methylstat	0.301913	1.63797e-11	8772
FADD	mitomycin	0.293484	1.25532e-15	8772
FADD	momelotinib	0.166542	2.603e-05	8772
FADD	myricetin	0.0644537	0.539246	8772
FADD	myriocin	-0.0735384	0.881137	8772
FADD	nakiterpiosin	0.25273	8.34824e-12	8772
FADD	narciclasine	0.298994	5.80869e-16	8772
FADD	navitoclax	0.237484	1.43567e-09	8772
FADD	necrostatin-1	0.113088	0.0111661	8772
FADD	necrostatin-7	0.0826508	0.0622079	8772
FADD	necrosulfonamide	0.328487	1.49328e-13	8772
FADD	nelarabine	0.00159838	0.997983	8772
FADD	neopeltolide	0.177257	0.0460254	8772
FADD	neratinib	0.0257422	0.600957	8772
FADD	neuronal differentiation inducer III	0.2025	6.85434e-08	8772
FADD	niclosamide	0.102145	0.0151227	8772
FADD	nilotinib	0.069601	0.334321	8772
FADD	nintedanib	0.0595407	0.265867	8772
FADD	nutlin-3	0.246603	1.14779e-10	8772
FADD	obatoclax	0.15131	6.5658e-05	8772
FADD	olaparib	0.275645	2.09686e-13	8772
FADD	oligomycin A	0.185229	1.70988e-06	8772
FADD	omacetaxine mepesuccinate	0.33825	3.95545e-15	8772
FADD	ouabain	0.258121	2.28288e-12	8772
FADD	paclitaxel	0.231975	5.13978e-10	8772
FADD	palmostatin B	0.0675854	0.522883	8772
FADD	pandacostat	0.12654	0.00548711	8772
FADD	panobinostat	0.320483	5.00666e-19	8772
FADD	parbendazole	0.288889	8.6867e-16	8772
FADD	parthenolide	0.1326	0.00904692	8772
FADD	pazopanib	0.178351	3.36135e-06	8772
FADD	pevonedistat	0.17023	1.1187e-05	8772
FADD	phloretin	0.217918	8.9088e-09	8772
FADD	pifithrin-alpha	0.0562707	0.346336	8772
FADD	pifithrin-mu	0.229222	1.4711e-09	8772
FADD	piperlongumine	0.284477	5.46823e-15	8772
FADD	pitstop2	0.0754854	0.663754	8772
FADD	pluripotin	-0.012446	0.8397	8772
FADD	procarbazine	-0.0844822	0.582998	8772
FADD	prochlorperazine	0.173239	2.9613e-05	8772
FADD	purmorphamine	0.131897	0.00347412	8772
FADD	pyrazolanthrone	0.0652683	0.183266	8772
FADD	quizartinib	0.100639	0.0603261	8772
FADD	regorafenib	0.0518911	0.305642	8772
FADD	rigosertib	0.286715	1.50623e-14	8772
FADD	ruxolitinib	0.0406676	0.365811	8772
FADD	salermide	0.0576277	0.548551	8772
FADD	saracatinib	-0.10868	0.0124485	8772
FADD	selumetinib	-0.0854435	0.0650959	8772
FADD	semagacestat	-0.0325648	0.832307	8772
FADD	serdemetan	0.290373	3.35249e-14	8772
FADD	sildenafil	0.0154223	0.92646	8772
FADD	silmitasertib	0.0393879	0.661544	8772
FADD	simvastatin	-0.000515753	0.994262	8772
FADD	sirolimus	0.143813	0.00020056	8772
FADD	sitagliptin	-0.081825	0.997718	8772
FADD	skepinone-L	0.165353	0.00597888	8772
FADD	sorafenib	0.0813801	0.0593596	8772
FADD	sotrastaurin	0.259368	5.99416e-09	8772
FADD	spautin-1	0.0752326	0.11504	8772
FADD	staurosporine	0.150058	0.173943	8772
FADD	sunitinib	0.181962	2.49595e-06	8772
FADD	tacedinaline	0.31146	1.14129e-12	8772
FADD	tacrolimus	0.170779	2.4363e-05	8772
FADD	tamatinib	-0.034222	0.697656	8772
FADD	tamoxifen	0.029957	0.690696	8772
FADD	tandutinib	0.135228	0.00128567	8772
FADD	tanespimycin	-0.00551821	0.936548	8772
FADD	temozolomide	0.0780083	0.190625	8772
FADD	temsirolimus	0.144319	0.0145273	8772
FADD	teniposide	0.28679	2.50683e-08	8772
FADD	thalidomide	0.091903	0.567237	8772
FADD	tigecycline	0.0318903	0.635939	8772
FADD	tipifarnib-P1	0.217164	1.37518e-08	8772
FADD	tipifarnib-P2	0.270276	1.81678e-07	8772
FADD	tivantinib	0.320045	2.22586e-09	8772
FADD	tivozanib	0.115197	0.0101081	8772
FADD	topotecan	0.241443	3.1937e-11	8772
FADD	tosedostat	0.0981354	0.019767	8772
FADD	tozasertib	0.324128	0.0345544	8772
FADD	trametinib	-0.100838	0.165326	8772
FADD	tretinoin	0.163627	3.3734e-05	8772
FADD	triazolothiadiazine	0.328241	2.90497e-20	8772
FADD	trifluoperazine	0.110245	0.0186592	8772
FADD	triptolide	0.183222	1.65463e-06	8772
FADD	tubastatin A	0.178601	0.00201547	8772
FADD	valdecoxib	0.165419	2.4505e-05	8772
FADD	vandetanib	-0.121978	0.00751488	8772
FADD	veliparib	0.0634788	0.391	8772
FADD	vemurafenib	-0.0330442	0.590368	8772
FADD	vincristine	0.300045	2.50694e-17	8772
FADD	vorapaxar	0.104414	0.0188715	8772
FADD	vorinostat	0.302714	1.46204e-16	8772
FADD	zebularine	0.19552	3.51478e-07	8772
FAS	16-beta-bromoandrosterone	0.110539	0.0158696	355
FAS	1S,3R-RSL-3	0.00429169	0.931777	355
FAS	3-Cl-AHPC	0.0457085	0.262062	355
FAS	968	0.0512703	0.979307	355
FAS	A-804598	0.0342624	0.853989	355
FAS	AA-COCF3	0.0520206	0.226278	355
FAS	ABT-199	0.0133192	0.842761	355
FAS	ABT-737	0.0287482	0.564854	355
FAS	AC55649	0.0278568	0.84357	355
FAS	AGK-2	0.00606779	0.992803	355
FAS	AM-580	0.0455063	0.403199	355
FAS	AT-406	-0.0426761	0.70414	355
FAS	AT13387	0.0315379	0.62367	355
FAS	AT7867	0.0628746	0.136619	355
FAS	AZ-3146	0.0527951	0.225759	355
FAS	AZD1480	0.131113	0.0510864	355
FAS	AZD4547	0.0738495	0.112259	355
FAS	AZD6482	-0.0409461	0.504573	355
FAS	AZD7545	0.0463471	0.30541	355
FAS	AZD7762	0.0164166	0.706667	355
FAS	AZD8055	0.0575401	0.162724	355
FAS	B02	0.108623	0.00677441	355
FAS	BCL-LZH-4	0.00297005	0.99323	355
FAS	BEC	-0.0763729	0.999979	355
FAS	BI-2536	0.128281	0.000550489	355
FAS	BIBR-1532	0.0936163	0.0340683	355
FAS	BIRB-796	0.0869715	0.051214	355
FAS	BIX-01294	0.136898	0.000374341	355
FAS	BMS-195614	0.0148623	0.848754	355
FAS	BMS-270394	0.0656764	0.151345	355
FAS	BMS-345541	0.0871381	0.0273604	355
FAS	BMS-536924	0.010444	0.879987	355
FAS	BMS-754807	0.0806756	0.0686139	355
FAS	BRD-A02303741	0.0136863	0.837404	355
FAS	BRD-A05715709	-0.0566128	0.710177	355
FAS	BRD-A71883111	0.0617176	0.163232	355
FAS	BRD-A86708339	0.170491	0.00344796	355
FAS	BRD-A94377914	0.135607	0.0145285	355
FAS	BRD-K01737880	0.132421	0.521522	355
FAS	BRD-K02251932	-0.000773547	0.992042	355
FAS	BRD-K02492147	-0.0554211	0.347912	355
FAS	BRD-K04800985	-0.00285534	0.999785	355
FAS	BRD-K09344309	-0.148428	0.697444	355
FAS	BRD-K09587429	-0.0643945	0.308392	355
FAS	BRD-K11533227	0.0345161	0.460899	355
FAS	BRD-K13999467	0.114195	0.00599743	355
FAS	BRD-K14844214	0.0050371	0.962052	355
FAS	BRD-K16147474	-0.0761519	0.869369	355
FAS	BRD-K17060750	-0.0529208	0.301525	355
FAS	BRD-K19103580	0.0349822	0.518182	355
FAS	BRD-K24690302	0.124224	0.00244193	355
FAS	BRD-K26531177	0.155873	9.7078e-05	355
FAS	BRD-K27224038	-0.0820424	0.749578	355
FAS	BRD-K27986637	0.00379571	0.986475	355
FAS	BRD-K28456706	0.077577	0.0643822	355
FAS	BRD-K29086754	-0.0676116	0.761538	355
FAS	BRD-K29313308	0.038655	0.396309	355
FAS	BRD-K30019337	0.0303858	0.937978	355
FAS	BRD-K30748066	0.174352	0.323231	355
FAS	BRD-K33199242	-0.0858895	0.825977	355
FAS	BRD-K33514849	0.0679845	0.999288	355
FAS	BRD-K34099515	0.0493017	0.954062	355
FAS	BRD-K34222889	0.14114	0.000192161	355
FAS	BRD-K34485477	0.0331992	0.998562	355
FAS	BRD-K35604418	0.149296	0.000120087	355
FAS	BRD-K37390332	-0.00630576	0.989905	355
FAS	BRD-K41334119	-0.00647911	0.995011	355
FAS	BRD-K41597374	0.0934671	0.0198431	355
FAS	BRD-K42260513	0.00564297	0.998533	355
FAS	BRD-K44224150	-0.0619527	0.989414	355
FAS	BRD-K45681478	0.160196	0.000129783	355
FAS	BRD-K48334597	0.0313878	0.827814	355
FAS	BRD-K48477130	-0.0436715	0.838704	355
FAS	BRD-K49290616	-0.0636197	0.878082	355
FAS	BRD-K50799972	0.00637683	0.950345	355
FAS	BRD-K51490254	0.051459	0.238747	355
FAS	BRD-K51831558	0.0286508	0.721311	355
FAS	BRD-K52037352	-0.0490957	0.457198	355
FAS	BRD-K55116708	0.0423563	0.377705	355
FAS	BRD-K61166597	0.118959	0.00272467	355
FAS	BRD-K63431240	-0.0360749	0.438942	355
FAS	BRD-K64610608	-0.0376657	0.757796	355
FAS	BRD-K66453893	0.101667	0.00805416	355
FAS	BRD-K66532283	0.0841453	0.038523	355
FAS	BRD-K70511574	0.103927	0.00689734	355
FAS	BRD-K71781559	-0.00749306	0.996572	355
FAS	BRD-K75293299	0.0161781	0.963486	355
FAS	BRD-K78574327	-0.0487118	0.970056	355
FAS	BRD-K80183349	0.0866232	0.0295768	355
FAS	BRD-K84807411	-0.00651808	0.987391	355
FAS	BRD-K85133207	0.0676172	0.127142	355
FAS	BRD-K86535717	-0.0263727	0.955672	355
FAS	BRD-K88742110	0.0409204	0.354298	355
FAS	BRD-K90370028	0.0142835	0.978429	355
FAS	BRD-K92856060	0.147053	0.000247565	355
FAS	BRD-K96431673	-0.0467038	0.993227	355
FAS	BRD-K96970199	-0.00270572	0.998764	355
FAS	BRD-K97651142	0.153063	0.000148829	355
FAS	BRD-K99006945	-0.0497383	0.513555	355
FAS	BRD-M00053801	0.133984	0.111771	355
FAS	BRD1378	0.006357	0.968222	355
FAS	BRD1812	0.102145	0.0106888	355
FAS	BRD1835	0.0810896	0.080823	355
FAS	BRD4132	0.0639524	0.295286	355
FAS	BRD5468	0.00545652	0.968399	355
FAS	BRD6340	0.087012	0.0293196	355
FAS	BRD8899	0.0250396	0.837199	355
FAS	BRD8958	-0.00252049	0.997223	355
FAS	BRD9647	-0.0119514	0.853226	355
FAS	BRD9876	0.0516712	0.403884	355
FAS	BYL-719	0.0180858	0.833635	355
FAS	Bax channel blocker	0.129357	0.00239583	355
FAS	C6-ceramide	0.036454	0.756909	355
FAS	CAL-101	-0.0750522	0.174819	355
FAS	CAY10576	-0.0185012	0.83679	355
FAS	CAY10594	0.0554375	0.34205	355
FAS	CAY10618	0.17029	7.42828e-06	355
FAS	CBB-1007	-0.0385434	0.844494	355
FAS	CCT036477	0.0463152	0.261557	355
FAS	CD-1530	0.0593925	0.274077	355
FAS	CD-437	0.0834597	0.0326412	355
FAS	CHIR-99021	-0.0316169	0.493133	355
FAS	CHM-1	0.094082	0.0138298	355
FAS	CI-976	0.0541472	0.702546	355
FAS	CID-5951923	0.0584926	0.476171	355
FAS	CIL41	0.0652156	0.363645	355
FAS	CIL55	0.0672644	0.772386	355
FAS	CIL55A	0.107815	0.0714622	355
FAS	CIL56	0.0401458	0.541327	355
FAS	CIL70	0.0831841	0.160461	355
FAS	COL-3	0.0701704	0.134838	355
FAS	CR-1-31B	0.0807076	0.033282	355
FAS	Ch-55	0.0830261	0.0722139	355
FAS	Compound 1541A	0.0503779	0.425643	355
FAS	Compound 23 citrate	0.0832735	0.036558	355
FAS	Compound 7d-cis	0.0618477	0.1659	355
FAS	DBeQ	0.0860719	0.0459083	355
FAS	DNMDP	-0.0462933	0.521394	355
FAS	ELCPK	0.0897391	0.143362	355
FAS	ETP-46464	0.0662494	0.226042	355
FAS	EX-527	0.00597676	0.969199	355
FAS	FGIN-1-27	0.00908496	0.95827	355
FAS	FQI-1	0.0611249	0.296654	355
FAS	FQI-2	0.10395	0.00624128	355
FAS	FSC231	0.00624876	0.99945	355
FAS	GANT-61	-0.0150053	0.841188	355
FAS	GDC-0879	0.0129102	0.854772	355
FAS	GDC-0941	0.0360383	0.462058	355
FAS	GMX-1778	0.193529	5.36815e-07	355
FAS	GSK-3 inhibitor IX	0.0192136	0.69079	355
FAS	GSK-J4	0.236816	0.120608	355
FAS	GSK1059615	0.0242338	0.942969	355
FAS	GSK2636771	-0.00304776	0.984947	355
FAS	GSK4112	0.0200647	0.726484	355
FAS	GSK461364	0.112874	0.00319732	355
FAS	GSK525762A	0.034077	0.401837	355
FAS	GW-405833	0.118906	0.00204624	355
FAS	GW-843682X	0.135469	0.000712383	355
FAS	HBX-41108	0.167811	0.000893297	355
FAS	HC-067047	0.0181079	0.808664	355
FAS	HLI 373	0.0484906	0.268541	355
FAS	I-BET151	0.0548357	0.158971	355
FAS	IC-87114	-0.113352	0.0366328	355
FAS	IPR-456	-0.0286273	0.865328	355
FAS	ISOX	0.179862	1.71806e-06	355
FAS	IU1	0.0290638	0.782341	355
FAS	JQ-1	0.0969648	0.0111798	355
FAS	JW-480	0.0199452	0.915975	355
FAS	JW-55	0.0403031	0.781857	355
FAS	JW-74	0.0235098	0.829277	355
FAS	KH-CB19	-0.0309481	0.795575	355
FAS	KHS101	0.148749	0.000268751	355
FAS	KPT185	0.122468	0.0067508	355
FAS	KU 0060648	0.0697275	0.0914815	355
FAS	KU-0063794	0.0707517	0.086314	355
FAS	KU-55933	0.0352893	0.449222	355
FAS	KU-60019	0.0661584	0.101838	355
FAS	KW-2449	0.102017	0.00802304	355
FAS	KX2-391	0.14786	9.7485e-05	355
FAS	Ki8751	0.0837174	0.0534566	355
FAS	Ko-143	0.0912234	0.0232917	355
FAS	L-685458	0.0183421	0.806296	355
FAS	LE-135	0.0160098	0.750627	355
FAS	LRRK2-IN-1	0.14009	0.00207098	355
FAS	LY-2157299	-0.0514542	0.847057	355
FAS	LY-2183240	0.137206	0.000256804	355
FAS	MG-132	0.0961534	0.242162	355
FAS	MGCD-265	0.135198	0.000444784	355
FAS	MI-1	0.0313431	0.739896	355
FAS	MI-2	0.182921	0.00362278	355
FAS	MK-0752	-0.0832445	0.224056	355
FAS	MK-1775	0.0316917	0.452302	355
FAS	MK-2206	0.077141	0.0753668	355
FAS	ML006	0.0393076	0.481056	355
FAS	ML029	0.102116	0.01774	355
FAS	ML031	0.130741	0.00198089	355
FAS	ML050	0.0730725	0.0892964	355
FAS	ML083	-0.0206021	0.892815	355
FAS	ML162	0.00210034	0.968892	355
FAS	ML203	0.112759	0.0250959	355
FAS	ML210	-0.015518	0.739412	355
FAS	ML239	0.126551	0.00184125	355
FAS	ML258	0.0666579	0.503605	355
FAS	ML311	0.129212	0.000580073	355
FAS	ML312	-0.0143936	0.997572	355
FAS	ML320	-0.0571437	0.227724	355
FAS	ML334 diastereomer	-0.0522274	0.479672	355
FAS	MLN2238	0.00517249	0.912053	355
FAS	MLN2480	0.0442022	0.701089	355
FAS	MST-312	0.115885	0.002642	355
FAS	Mdivi-1	0.0565495	0.19078	355
FAS	Merck60	0.106159	0.00538347	355
FAS	N9-isopropylolomoucine	0.021745	0.628904	355
FAS	NPC-26	0.00794193	0.96604	355
FAS	NSC 74859	-0.0200847	0.745206	355
FAS	NSC19630	0.160994	0.000560068	355
FAS	NSC23766	0.0889816	0.0287368	355
FAS	NSC30930	-0.0652997	0.327309	355
FAS	NSC48300	0.0559499	0.165728	355
FAS	NSC632839	0.0464392	0.247316	355
FAS	NSC95397	0.141507	0.000473356	355
FAS	NVP-231	0.0689789	0.0824333	355
FAS	NVP-ADW742	0.141431	0.000664589	355
FAS	NVP-BEZ235	0.0696102	0.173182	355
FAS	NVP-BSK805	0.069277	0.0886269	355
FAS	NVP-TAE684	0.0610871	0.197978	355
FAS	O-6-benzylguanine	-0.0182736	0.915097	355
FAS	OSI-027	0.0652022	0.131989	355
FAS	OSI-930	0.0899786	0.0427471	355
FAS	PAC-1	0.184397	1.94326e-06	355
FAS	PD 153035	0.012285	0.866426	355
FAS	PD318088	-0.00335681	0.957872	355
FAS	PDMP	0.149066	0.000262762	355
FAS	PF-184	0.0330269	0.433345	355
FAS	PF-3758309	0.0436985	0.465661	355
FAS	PF-4800567 hydrochloride	0.0183974	0.999586	355
FAS	PF-543	0.0726025	0.115462	355
FAS	PF-573228	0.0821019	0.0403346	355
FAS	PF-750	0.107838	0.017561	355
FAS	PHA-793887	0.0692383	0.0725263	355
FAS	PI-103	0.0793569	0.0562118	355
FAS	PIK-93	-0.0152227	0.750064	355
FAS	PL-DI	0.118444	0.00211309	355
FAS	PLX-4720	-0.00127993	0.991716	355
FAS	PRIMA-1	0.1167	0.00302002	355
FAS	PRIMA-1-Met	0.00209164	0.981224	355
FAS	PRL-3 inhibitor I	0.0452865	0.731557	355
FAS	PX-12	0.139831	0.000233098	355
FAS	PYR-41	0.0302852	0.602205	355
FAS	QS-11	0.0129763	0.974436	355
FAS	QW-BI-011	0.0861848	0.363483	355
FAS	R428	0.058021	0.275211	355
FAS	RAF265	0.0466501	0.427216	355
FAS	RG-108	0.148936	0.000296538	355
FAS	RITA	0.034597	0.442048	355
FAS	RO4929097	0.0206478	0.815952	355
FAS	Repligen 136	0.111207	0.00821827	355
FAS	SB-225002	0.131036	0.000449518	355
FAS	SB-431542	0.0207421	0.867828	355
FAS	SB-525334	0.166871	0.000187244	355
FAS	SB-743921	0.133323	0.000336821	355
FAS	SCH-529074	0.13241	0.00261962	355
FAS	SCH-79797	0.156593	3.9774e-05	355
FAS	SGX-523	-0.0723831	0.19314	355
FAS	SID 26681509	0.0683785	0.137167	355
FAS	SJ-172550	0.00144691	0.991841	355
FAS	SKI-II	0.0874434	0.0450757	355
FAS	SMER-3	0.10584	0.0166868	355
FAS	SN-38	0.039779	0.409026	355
FAS	SNS-032	0.0785545	0.0592226	355
FAS	SNX-2112	0.00601544	0.887447	355
FAS	SR-II-138A	0.0881596	0.0187287	355
FAS	SR1001	0.0128259	0.886862	355
FAS	SR8278	0.162225	0.612233	355
FAS	SRT-1720	0.0768465	0.0855318	355
FAS	STF-31	0.17803	4.53659e-06	355
FAS	SU11274	0.101324	0.0116536	355
FAS	SZ4TA2	0.00746357	0.963635	355
FAS	StemRegenin 1	0.0954105	0.0177635	355
FAS	TG-100-115	0.090508	0.0595921	355
FAS	TG-101348	0.0142201	0.762492	355
FAS	TGX-221	-0.0877544	0.153931	355
FAS	TPCA-1	0.0150958	0.740443	355
FAS	TW-37	0.1388	0.000467599	355
FAS	UNC0321	-0.0283113	0.824701	355
FAS	UNC0638	0.074961	0.0806426	355
FAS	VAF-347	-0.0762131	0.221605	355
FAS	VER-155008	0.0665103	0.117916	355
FAS	VU0155056	0.0443771	0.89481	355
FAS	WAY-362450	-0.0220042	0.998521	355
FAS	WP1130	0.0744152	0.0702202	355
FAS	WZ4002	0.0964709	0.131789	355
FAS	WZ8040	0.079615	0.108883	355
FAS	XL765	0.0298484	0.651941	355
FAS	YK 4-279	0.12627	0.000853863	355
FAS	YM-155	0.0306792	0.559284	355
FAS	ZSTK474	0.0140754	0.827746	355
FAS	abiraterone	0.0308167	0.856932	355
FAS	afatinib	0.026342	0.620738	355
FAS	alisertib	0.0883123	0.0246118	355
FAS	alvocidib	0.165734	0.00356128	355
FAS	apicidin	0.159236	1.9237e-05	355
FAS	austocystin D	0.102594	0.0229565	355
FAS	avicin D	-0.0610506	0.510731	355
FAS	avrainvillamide	0.0808658	0.102168	355
FAS	axitinib	0.172553	4.92963e-06	355
FAS	azacitidine	-0.0231373	0.665653	355
FAS	bafilomycin A1	-0.0495697	0.944316	355
FAS	barasertib	0.134662	0.000495792	355
FAS	bardoxolone methyl	0.0665326	0.121795	355
FAS	belinostat	0.25873	1.38697e-06	355
FAS	bendamustine	0.0148676	0.760509	355
FAS	betulinic acid	-0.00623643	0.981646	355
FAS	bexarotene	0.0626073	0.154415	355
FAS	birinapant	-0.04603	0.489935	355
FAS	blebbistatin	-0.0790036	0.901769	355
FAS	bleomycin A2	-0.141094	0.00305582	355
FAS	bortezomib	0.0335599	0.432033	355
FAS	bosutinib	-0.00877747	0.855271	355
FAS	brefeldin A	0.114757	0.00767236	355
FAS	brivanib	0.0701693	0.087774	355
FAS	cabozantinib	0.0557042	0.25637	355
FAS	canertinib	-0.00211139	0.973582	355
FAS	cediranib	-0.0208702	0.896518	355
FAS	ceranib-2	0.146844	8.6121e-05	355
FAS	cerulenin	0.14689	0.000119626	355
FAS	chlorambucil	0.0205316	0.637824	355
FAS	ciclopirox	0.0979773	0.00954864	355
FAS	ciclosporin	-0.0154457	0.815332	355
FAS	cimetidine	-0.00722968	0.99519	355
FAS	clofarabine	-0.0102908	0.806407	355
FAS	crizotinib	0.0940414	0.0167506	355
FAS	cucurbitacin I	0.0857539	0.0374214	355
FAS	curcumin	0.0635031	0.110531	355
FAS	cyanoquinoline 11	0.0790374	0.355497	355
FAS	cyclophosphamide	0.0271784	0.994077	355
FAS	cytarabine hydrochloride	0.0284968	0.480172	355
FAS	cytochalasin B	0.0156112	0.804743	355
FAS	dabrafenib	-0.0794775	0.290829	355
FAS	dacarbazine	-0.0238996	0.573343	355
FAS	daporinad	0.155465	0.000251788	355
FAS	darinaparsin	0.0620479	0.360228	355
FAS	dasatinib	-0.157561	0.000125934	355
FAS	decitabine	0.0612302	0.115064	355
FAS	dexamethasone	0.0210916	0.652468	355
FAS	dinaciclib	0.202555	0.000243082	355
FAS	docetaxel	0.135327	0.0227763	355
FAS	doxorubicin	0.0484821	0.214798	355
FAS	elocalcitol	0.105035	0.00702806	355
FAS	entinostat	0.174978	3.90671e-06	355
FAS	epigallocatechin-3-monogallate	0.0640448	0.16626	355
FAS	erastin	0.0264509	0.582217	355
FAS	erismodegib	0.0535409	0.483966	355
FAS	erlotinib	-0.0721405	0.10557	355
FAS	etomoxir	-0.0183121	0.97986	355
FAS	etoposide	0.0264749	0.520381	355
FAS	fingolimod	0.104662	0.00793381	355
FAS	fluorouracil	-0.0274487	0.509017	355
FAS	fluvastatin	-0.0812079	0.102891	355
FAS	foretinib	0.078306	0.0646894	355
FAS	fulvestrant	0.033705	0.948112	355
FAS	fumonisin B1	-0.0750817	0.162984	355
FAS	gefitinib	0.00631652	0.928218	355
FAS	gemcitabine	0.0692665	0.0915438	355
FAS	gossypol	0.105029	0.0088595	355
FAS	hyperforin	0.0347286	0.720371	355
FAS	ibrutinib	0.111436	0.0394511	355
FAS	ifosfamide	-0.00307471	0.992445	355
FAS	imatinib	0.0826524	0.051018	355
FAS	importazole	0.0617892	0.309091	355
FAS	indisulam	0.0921503	0.021607	355
FAS	isoevodiamine	0.119691	0.0016072	355
FAS	isoliquiritigenin	0.0975585	0.269191	355
FAS	isonicotinohydroxamic acid	-0.0215906	0.992739	355
FAS	istradefylline	0.0474989	0.78346	355
FAS	itraconazole	0.0275259	0.731934	355
FAS	lapatinib	0.0678567	0.13192	355
FAS	lenvatinib	0.0748305	0.0917185	355
FAS	leptomycin B	0.0372425	0.345657	355
FAS	linifanib	0.153708	5.4194e-05	355
FAS	linsitinib	0.146785	0.000341422	355
FAS	lomeguatrib	-0.00235233	0.974994	355
FAS	lovastatin	-0.162183	0.000150163	355
FAS	manumycin A	0.103452	0.00692229	355
FAS	marinopyrrole A	0.127483	0.0109811	355
FAS	masitinib	0.0962598	0.0195466	355
FAS	methotrexate	0.0167901	0.714482	355
FAS	methylstat	0.0790373	0.108877	355
FAS	mitomycin	0.0716007	0.0700331	355
FAS	momelotinib	-0.00228325	0.962412	355
FAS	myricetin	0.027603	0.824501	355
FAS	myriocin	-0.127523	0.800897	355
FAS	nakiterpiosin	0.111248	0.00385767	355
FAS	narciclasine	0.0957715	0.0136278	355
FAS	navitoclax	0.0336926	0.467792	355
FAS	necrostatin-1	0.051775	0.286115	355
FAS	necrostatin-7	0.11815	0.00593967	355
FAS	necrosulfonamide	0.155702	0.000830637	355
FAS	nelarabine	-0.0572539	0.772679	355
FAS	neopeltolide	0.0719673	0.470788	355
FAS	neratinib	0.0110856	0.836512	355
FAS	neuronal differentiation inducer III	0.140763	0.000223144	355
FAS	niclosamide	0.13221	0.00128557	355
FAS	nilotinib	0.0700992	0.329603	355
FAS	nintedanib	0.0298828	0.624679	355
FAS	nutlin-3	-0.0346459	0.42712	355
FAS	obatoclax	0.0808431	0.0389045	355
FAS	olaparib	0.0557105	0.181238	355
FAS	oligomycin A	0.149062	0.000134347	355
FAS	omacetaxine mepesuccinate	0.0525363	0.269904	355
FAS	ouabain	0.0652503	0.0950126	355
FAS	paclitaxel	0.108059	0.00533312	355
FAS	palmostatin B	-0.000955226	0.996104	355
FAS	pandacostat	0.0317515	0.521193	355
FAS	panobinostat	0.218875	2.59036e-09	355
FAS	parbendazole	0.108913	0.00361601	355
FAS	parthenolide	0.0859537	0.107538	355
FAS	pazopanib	0.105322	0.00780575	355
FAS	pevonedistat	0.00586698	0.900788	355
FAS	phloretin	0.137134	0.000399321	355
FAS	pifithrin-alpha	0.0332366	0.624533	355
FAS	pifithrin-mu	0.119468	0.0023081	355
FAS	piperlongumine	0.11513	0.00236283	355
FAS	pitstop2	-0.026942	0.909986	355
FAS	pluripotin	-0.0529982	0.289825	355
FAS	procarbazine	-0.0170326	0.944789	355
FAS	prochlorperazine	0.114027	0.00784052	355
FAS	purmorphamine	0.0550082	0.252606	355
FAS	pyrazolanthrone	-0.000614952	0.993114	355
FAS	quizartinib	0.0213446	0.762486	355
FAS	regorafenib	0.0616869	0.213698	355
FAS	rigosertib	0.0955435	0.0152916	355
FAS	ruxolitinib	-0.0543128	0.213025	355
FAS	salermide	0.0435199	0.674304	355
FAS	saracatinib	-0.106982	0.014157	355
FAS	selumetinib	-0.00911324	0.8883	355
FAS	semagacestat	0.0100759	0.957901	355
FAS	serdemetan	0.0858169	0.0352085	355
FAS	sildenafil	0.046602	0.701194	355
FAS	silmitasertib	-0.00460585	0.970194	355
FAS	simvastatin	-0.156842	0.00203051	355
FAS	sirolimus	0.0456663	0.271345	355
FAS	sitagliptin	-0.00679704	0.997718	355
FAS	skepinone-L	0.171196	0.00434993	355
FAS	sorafenib	0.138505	0.000881018	355
FAS	sotrastaurin	0.147045	0.00138091	355
FAS	spautin-1	0.0978535	0.0366573	355
FAS	staurosporine	-0.0734923	0.588729	355
FAS	sunitinib	0.0645152	0.118135	355
FAS	tacedinaline	0.209846	2.92289e-06	355
FAS	tacrolimus	0.0755876	0.0785422	355
FAS	tamatinib	-0.0278287	0.764239	355
FAS	tamoxifen	0.0403358	0.564989	355
FAS	tandutinib	0.0916423	0.0344377	355
FAS	tanespimycin	-0.024582	0.676547	355
FAS	temozolomide	0.000915195	0.992601	355
FAS	temsirolimus	0.0646322	0.320297	355
FAS	teniposide	0.0300018	0.612635	355
FAS	thalidomide	-0.0113501	0.969557	355
FAS	tigecycline	0.0801557	0.193072	355
FAS	tipifarnib-P1	0.0855872	0.0311013	355
FAS	tipifarnib-P2	0.0572523	0.330926	355
FAS	tivantinib	0.19076	0.000586744	355
FAS	tivozanib	0.0567865	0.244992	355
FAS	topotecan	0.040047	0.316547	355
FAS	tosedostat	0.0984501	0.0193408	355
FAS	tozasertib	0.0607724	0.75852	355
FAS	trametinib	-0.0282309	0.759254	355
FAS	tretinoin	0.0790551	0.0567913	355
FAS	triazolothiadiazine	0.115523	0.0020033	355
FAS	trifluoperazine	0.0354547	0.529934	355
FAS	triptolide	0.0150794	0.729391	355
FAS	tubastatin A	0.0489625	0.460254	355
FAS	valdecoxib	0.14233	0.000310299	355
FAS	vandetanib	-0.0379173	0.490276	355
FAS	veliparib	-0.0152614	0.878559	355
FAS	vemurafenib	-0.017765	0.79604	355
FAS	vincristine	0.130255	0.000394912	355
FAS	vorapaxar	0.0456986	0.352806	355
FAS	vorinostat	0.186525	6.97226e-07	355
FAS	zebularine	-0.0107541	0.813894	355
FASLG	16-beta-bromoandrosterone	-0.0512578	0.300235	356
FASLG	1S,3R-RSL-3	0.00607143	0.901529	356
FASLG	3-Cl-AHPC	-0.111149	0.00396841	356
FASLG	968	0.0541537	0.97707	356
FASLG	A-804598	-0.0737366	0.605599	356
FASLG	AA-COCF3	-0.0486346	0.2596	356
FASLG	ABT-199	-0.00541585	0.938446	356
FASLG	ABT-737	0.0335483	0.494994	356
FASLG	AC55649	0.00565503	0.976622	356
FASLG	AGK-2	0.00560501	0.992803	356
FASLG	AM-580	0.0135415	0.834223	356
FASLG	AT-406	0.0590759	0.572367	356
FASLG	AT13387	-0.14671	0.0113194	356
FASLG	AT7867	-0.0328446	0.464334	356
FASLG	AZ-3146	-0.0787655	0.0607082	356
FASLG	AZD1480	0.0747035	0.307864	356
FASLG	AZD4547	-0.00304607	0.961363	356
FASLG	AZD6482	0.0151852	0.838697	356
FASLG	AZD7545	-0.042059	0.356824	356
FASLG	AZD7762	-0.0851338	0.0291083	356
FASLG	AZD8055	-0.126152	0.00139963	356
FASLG	B02	-0.0955154	0.0181649	356
FASLG	BCL-LZH-4	0.0975828	0.578428	356
FASLG	BEC	0.0722744	0.999979	356
FASLG	BI-2536	-0.0917934	0.0147526	356
FASLG	BIBR-1532	0.0015145	0.979602	356
FASLG	BIRB-796	0.0262713	0.600416	356
FASLG	BIX-01294	-0.0983426	0.0118942	356
FASLG	BMS-195614	0.0457692	0.473291	356
FASLG	BMS-270394	0.00803196	0.888345	356
FASLG	BMS-345541	-0.155271	5.8175e-05	356
FASLG	BMS-536924	-0.0447842	0.423671	356
FASLG	BMS-754807	-0.0414803	0.392245	356
FASLG	BRD-A02303741	0.0149878	0.820723	356
FASLG	BRD-A05715709	0.0591492	0.695163	356
FASLG	BRD-A71883111	-0.0474518	0.297657	356
FASLG	BRD-A86708339	-0.0819472	0.181279	356
FASLG	BRD-A94377914	-0.0180023	0.781691	356
FASLG	BRD-K01737880	0.00785209	0.981196	356
FASLG	BRD-K02251932	-0.0437259	0.417162	356
FASLG	BRD-K02492147	0.100466	0.070762	356
FASLG	BRD-K04800985	0.00666654	0.999785	356
FASLG	BRD-K09344309	0.0234851	0.980193	356
FASLG	BRD-K09587429	0.0478965	0.465624	356
FASLG	BRD-K11533227	-0.0568181	0.205296	356
FASLG	BRD-K13999467	-0.00781768	0.883028	356
FASLG	BRD-K14844214	-0.0229869	0.788282	356
FASLG	BRD-K16147474	0.0370622	0.925035	356
FASLG	BRD-K17060750	0.0476537	0.360361	356
FASLG	BRD-K19103580	-0.011247	0.854955	356
FASLG	BRD-K24690302	-0.063668	0.142275	356
FASLG	BRD-K26531177	-0.0134436	0.774501	356
FASLG	BRD-K27224038	0.0817567	0.749826	356
FASLG	BRD-K27986637	0.0531657	0.762949	356
FASLG	BRD-K28456706	-0.0051512	0.920764	356
FASLG	BRD-K29086754	0.162333	0.316159	356
FASLG	BRD-K29313308	0.00617277	0.903675	356
FASLG	BRD-K30019337	0.171726	0.40572	356
FASLG	BRD-K30748066	-0.138305	0.452312	356
FASLG	BRD-K33199242	-0.00535591	0.994011	356
FASLG	BRD-K33514849	-0.100015	0.999288	356
FASLG	BRD-K34099515	-0.0901989	0.895134	356
FASLG	BRD-K34222889	-0.0445488	0.268314	356
FASLG	BRD-K34485477	-0.00166983	0.999899	356
FASLG	BRD-K35604418	-0.0593035	0.145899	356
FASLG	BRD-K37390332	0.0271858	0.926706	356
FASLG	BRD-K41334119	0.115186	0.838479	356
FASLG	BRD-K41597374	-0.049354	0.241448	356
FASLG	BRD-K42260513	0.0916498	0.973398	356
FASLG	BRD-K44224150	0.0671956	0.987574	356
FASLG	BRD-K45681478	-0.0337894	0.487093	356
FASLG	BRD-K48334597	0.0181288	0.907506	356
FASLG	BRD-K48477130	0.0961125	0.612321	356
FASLG	BRD-K49290616	0.0762284	0.84748	356
FASLG	BRD-K50799972	0.0911032	0.146778	356
FASLG	BRD-K51490254	-0.0859331	0.0417358	356
FASLG	BRD-K51831558	-0.0651029	0.367312	356
FASLG	BRD-K52037352	-0.0192609	0.803094	356
FASLG	BRD-K55116708	0.0284351	0.572488	356
FASLG	BRD-K61166597	-0.0321553	0.453407	356
FASLG	BRD-K63431240	-0.0609241	0.167568	356
FASLG	BRD-K64610608	-0.0707496	0.508706	356
FASLG	BRD-K66453893	-0.0409312	0.308218	356
FASLG	BRD-K66532283	-0.0357673	0.405571	356
FASLG	BRD-K70511574	-0.0530536	0.183633	356
FASLG	BRD-K71781559	-0.00731124	0.996572	356
FASLG	BRD-K75293299	0.0985181	0.680396	356
FASLG	BRD-K78574327	0.100582	0.955639	356
FASLG	BRD-K80183349	-0.0975755	0.0136087	356
FASLG	BRD-K84807411	0.154139	0.50972	356
FASLG	BRD-K85133207	-0.100635	0.0189872	356
FASLG	BRD-K86535717	0.0232382	0.962144	356
FASLG	BRD-K88742110	-0.0357123	0.424049	356
FASLG	BRD-K90370028	0.0150169	0.978141	356
FASLG	BRD-K92856060	0.0358832	0.422138	356
FASLG	BRD-K96431673	0.0623121	0.986141	356
FASLG	BRD-K96970199	0.00307493	0.998764	356
FASLG	BRD-K97651142	-0.08752	0.0358831	356
FASLG	BRD-K99006945	0.10307	0.14258	356
FASLG	BRD-M00053801	-0.0470046	0.664437	356
FASLG	BRD1378	0.0336544	0.782202	356
FASLG	BRD1812	-0.0241853	0.58627	356
FASLG	BRD1835	-0.0252853	0.637628	356
FASLG	BRD4132	-0.0580172	0.352218	356
FASLG	BRD5468	0.0543004	0.513463	356
FASLG	BRD6340	-0.0740213	0.0662303	356
FASLG	BRD8899	0.0302063	0.801519	356
FASLG	BRD8958	-0.0193638	0.982654	356
FASLG	BRD9647	0.0881898	0.0671659	356
FASLG	BRD9876	-0.0849803	0.145917	356
FASLG	BYL-719	-0.0815638	0.198373	356
FASLG	Bax channel blocker	-0.000385339	0.994623	356
FASLG	C6-ceramide	0.0889457	0.374276	356
FASLG	CAL-101	0.0695032	0.218318	356
FASLG	CAY10576	0.115768	0.0773081	356
FASLG	CAY10594	-0.00392203	0.961185	356
FASLG	CAY10618	-0.0911108	0.0217583	356
FASLG	CBB-1007	0.0039344	0.990403	356
FASLG	CCT036477	0.0114645	0.797918	356
FASLG	CD-1530	0.0150739	0.823388	356
FASLG	CD-437	-0.0769929	0.0496734	356
FASLG	CHIR-99021	-0.00344103	0.948478	356
FASLG	CHM-1	-0.0961668	0.0117936	356
FASLG	CI-976	-0.0127754	0.953266	356
FASLG	CID-5951923	-0.0544707	0.51962	356
FASLG	CIL41	-0.0446808	0.558798	356
FASLG	CIL55	0.132949	0.516476	356
FASLG	CIL55A	-0.158188	0.00634849	356
FASLG	CIL56	0.0456628	0.482175	356
FASLG	CIL70	-0.0250846	0.706296	356
FASLG	COL-3	-0.122734	0.00707154	356
FASLG	CR-1-31B	-0.152389	4e-05	356
FASLG	Ch-55	0.0537749	0.277478	356
FASLG	Compound 1541A	0.0482186	0.451091	356
FASLG	Compound 23 citrate	-0.149795	0.00011133	356
FASLG	Compound 7d-cis	-0.00218578	0.968003	356
FASLG	DBeQ	-0.033922	0.465129	356
FASLG	DNMDP	0.0857606	0.194487	356
FASLG	ELCPK	0.0468257	0.474388	356
FASLG	ETP-46464	-0.0355073	0.549689	356
FASLG	EX-527	-0.0749958	0.466618	356
FASLG	FGIN-1-27	0.13713	0.23887	356
FASLG	FQI-1	-0.078841	0.169312	356
FASLG	FQI-2	-0.0504485	0.203511	356
FASLG	FSC231	0.0133175	0.99945	356
FASLG	GANT-61	-0.049994	0.404674	356
FASLG	GDC-0879	-0.0525452	0.34192	356
FASLG	GDC-0941	-0.0473206	0.31618	356
FASLG	GMX-1778	-0.107312	0.00758011	356
FASLG	GSK-3 inhibitor IX	-0.00780572	0.878833	356
FASLG	GSK-J4	-0.165098	0.306755	356
FASLG	GSK1059615	0.0185387	0.958755	356
FASLG	GSK2636771	0.0607086	0.521885	356
FASLG	GSK4112	-0.0534656	0.285719	356
FASLG	GSK461364	-0.10065	0.00893477	356
FASLG	GSK525762A	-0.0880265	0.0218773	356
FASLG	GW-405833	-0.0998003	0.010198	356
FASLG	GW-843682X	-0.0530718	0.213532	356
FASLG	HBX-41108	-0.00526	0.942854	356
FASLG	HC-067047	0.00171854	0.984216	356
FASLG	HLI 373	-0.0501638	0.25121	356
FASLG	I-BET151	-0.103566	0.00610051	356
FASLG	IC-87114	0.018574	0.827325	356
FASLG	IPR-456	0.114069	0.2295	356
FASLG	ISOX	-0.0346866	0.399161	356
FASLG	IU1	-0.000879899	0.994489	356
FASLG	JQ-1	-0.0938232	0.0142466	356
FASLG	JW-480	0.0885259	0.628017	356
FASLG	JW-55	0.166292	0.163735	356
FASLG	JW-74	0.0348455	0.723267	356
FASLG	KH-CB19	0.0788378	0.468393	356
FASLG	KHS101	-0.0915247	0.0298593	356
FASLG	KPT185	-0.071803	0.123781	356
FASLG	KU 0060648	-0.0791765	0.0531087	356
FASLG	KU-0063794	-0.139441	0.000473324	356
FASLG	KU-55933	-0.0421327	0.358345	356
FASLG	KU-60019	-0.0796676	0.0457492	356
FASLG	KW-2449	-0.0320347	0.438631	356
FASLG	KX2-391	-0.0790645	0.0430147	356
FASLG	Ki8751	-0.00526828	0.927337	356
FASLG	Ko-143	-0.0626599	0.127899	356
FASLG	L-685458	0.00741796	0.926925	356
FASLG	LE-135	-0.0916546	0.0326836	356
FASLG	LRRK2-IN-1	-0.0953341	0.0392889	356
FASLG	LY-2157299	0.150401	0.441093	356
FASLG	LY-2183240	-0.0773017	0.0443038	356
FASLG	MG-132	0.0721404	0.401055	356
FASLG	MGCD-265	0.00773876	0.864651	356
FASLG	MI-1	0.0352952	0.698673	356
FASLG	MI-2	-0.0725982	0.289033	356
FASLG	MK-0752	0.100515	0.155568	356
FASLG	MK-1775	-0.0658519	0.101581	356
FASLG	MK-2206	-0.0599403	0.175939	356
FASLG	ML006	-0.0567065	0.284885	356
FASLG	ML029	-0.0271005	0.582232	356
FASLG	ML031	-0.103559	0.0155772	356
FASLG	ML050	0.00362036	0.945578	356
FASLG	ML083	-0.0381698	0.76304	356
FASLG	ML162	0.00132562	0.981231	356
FASLG	ML203	-0.0823191	0.105006	356
FASLG	ML210	0.0264165	0.559163	356
FASLG	ML239	0.0679718	0.115041	356
FASLG	ML258	-0.000457287	0.99817	356
FASLG	ML311	-0.0411597	0.303325	356
FASLG	ML312	0.0190409	0.994988	356
FASLG	ML320	0.0588397	0.213346	356
FASLG	ML334 diastereomer	0.0325873	0.689262	356
FASLG	MLN2238	-0.0802658	0.0428428	356
FASLG	MLN2480	-0.0372535	0.755932	356
FASLG	MST-312	-0.0488002	0.225574	356
FASLG	Mdivi-1	-0.0139317	0.775676	356
FASLG	Merck60	-0.0539235	0.172627	356
FASLG	N9-isopropylolomoucine	-0.0706867	0.0880854	356
FASLG	NPC-26	-0.0192441	0.893302	356
FASLG	NSC 74859	0.0206174	0.738111	356
FASLG	NSC19630	-0.0805061	0.102285	356
FASLG	NSC23766	-0.0149279	0.747687	356
FASLG	NSC30930	0.0644504	0.332562	356
FASLG	NSC48300	-0.00827065	0.851728	356
FASLG	NSC632839	-0.0947338	0.0142204	356
FASLG	NSC95397	-0.0347353	0.427709	356
FASLG	NVP-231	-0.0406565	0.324265	356
FASLG	NVP-ADW742	-0.0624159	0.166967	356
FASLG	NVP-BEZ235	-0.107017	0.0302392	356
FASLG	NVP-BSK805	-0.0354945	0.407243	356
FASLG	NVP-TAE684	-0.0587338	0.219192	356
FASLG	O-6-benzylguanine	0.00604418	0.973474	356
FASLG	OSI-027	-0.0306185	0.514228	356
FASLG	OSI-930	-0.0694791	0.124401	356
FASLG	PAC-1	-0.0422455	0.313567	356
FASLG	PD 153035	-0.0922183	0.0956527	356
FASLG	PD318088	-0.0884855	0.0489459	356
FASLG	PDMP	-0.0684194	0.114937	356
FASLG	PF-184	-0.0464053	0.262221	356
FASLG	PF-3758309	-0.128405	0.0222636	356
FASLG	PF-4800567 hydrochloride	0.0196557	0.999586	356
FASLG	PF-543	-0.102199	0.0221743	356
FASLG	PF-573228	-0.0665537	0.102186	356
FASLG	PF-750	-0.01389	0.801134	356
FASLG	PHA-793887	-0.123463	0.00103344	356
FASLG	PI-103	0.0145565	0.761168	356
FASLG	PIK-93	-0.0372151	0.403522	356
FASLG	PL-DI	-0.0216318	0.608551	356
FASLG	PLX-4720	0.0470163	0.52962	356
FASLG	PRIMA-1	-0.0554346	0.174999	356
FASLG	PRIMA-1-Met	0.00710746	0.935945	356
FASLG	PRL-3 inhibitor I	0.0484658	0.706047	356
FASLG	PX-12	-0.0838506	0.0306674	356
FASLG	PYR-41	-0.0795847	0.121627	356
FASLG	QS-11	-0.107493	0.652393	356
FASLG	QW-BI-011	0.110455	0.226365	356
FASLG	R428	-0.0166073	0.783129	356
FASLG	RAF265	-0.0352861	0.565931	356
FASLG	RG-108	0.0157415	0.773396	356
FASLG	RITA	-0.0647652	0.128117	356
FASLG	RO4929097	-0.0988593	0.184176	356
FASLG	Repligen 136	-0.0115855	0.818662	356
FASLG	SB-225002	-0.0428845	0.278264	356
FASLG	SB-431542	-0.0403732	0.703172	356
FASLG	SB-525334	0.031308	0.584886	356
FASLG	SB-743921	-0.0741178	0.052078	356
FASLG	SCH-529074	-0.0269715	0.604306	356
FASLG	SCH-79797	-0.0587163	0.146013	356
FASLG	SGX-523	0.0735648	0.18489	356
FASLG	SID 26681509	0.0109339	0.84294	356
FASLG	SJ-172550	0.0307821	0.810755	356
FASLG	SKI-II	0.016037	0.760844	356
FASLG	SMER-3	-0.000780268	0.988558	356
FASLG	SN-38	-0.0493671	0.294447	356
FASLG	SNS-032	-0.0372572	0.394733	356
FASLG	SNX-2112	-0.157069	2.3392e-05	356
FASLG	SR-II-138A	-0.155237	2.4149e-05	356
FASLG	SR1001	0.0238372	0.775546	356
FASLG	SR8278	-0.227595	0.485454	356
FASLG	SRT-1720	-0.00379941	0.946907	356
FASLG	STF-31	-0.0797367	0.0520956	356
FASLG	SU11274	-0.0773659	0.0582962	356
FASLG	SZ4TA2	0.0606838	0.606518	356
FASLG	StemRegenin 1	-0.0329951	0.44703	356
FASLG	TG-100-115	0.0172736	0.785164	356
FASLG	TG-101348	-0.00748927	0.879707	356
FASLG	TGX-221	0.0595641	0.382838	356
FASLG	TPCA-1	-0.0338914	0.42763	356
FASLG	TW-37	-0.111309	0.00547056	356
FASLG	UNC0321	0.0280594	0.826999	356
FASLG	UNC0638	-0.0578941	0.188792	356
FASLG	VAF-347	-0.0107511	0.894314	356
FASLG	VER-155008	-0.0332053	0.463715	356
FASLG	VU0155056	-0.0255761	0.949926	356
FASLG	WAY-362450	0.0810603	0.998521	356
FASLG	WP1130	-0.042251	0.325027	356
FASLG	WZ4002	-0.0519711	0.477858	356
FASLG	WZ8040	-0.0799205	0.107456	356
FASLG	XL765	0.0367729	0.561904	356
FASLG	YK 4-279	-0.041525	0.302207	356
FASLG	YM-155	0.0929249	0.0449224	356
FASLG	ZSTK474	0.00593117	0.931609	356
FASLG	abiraterone	0.00644947	0.97295	356
FASLG	afatinib	-0.0917685	0.0436169	356
FASLG	alisertib	-0.0557965	0.167842	356
FASLG	alvocidib	-0.116497	0.0445534	356
FASLG	apicidin	-0.0384028	0.337419	356
FASLG	austocystin D	-0.0555276	0.250702	356
FASLG	avicin D	0.026965	0.808647	356
FASLG	avrainvillamide	-0.0463318	0.373061	356
FASLG	axitinib	-0.0112948	0.801388	356
FASLG	azacitidine	-0.0998243	0.0306632	356
FASLG	bafilomycin A1	-0.082721	0.889356	356
FASLG	barasertib	-0.0285507	0.506791	356
FASLG	bardoxolone methyl	-0.0833391	0.049273	356
FASLG	belinostat	-0.176061	0.00132794	356
FASLG	bendamustine	-0.0404515	0.370915	356
FASLG	betulinic acid	-0.000607643	0.998072	356
FASLG	bexarotene	-0.051079	0.254168	356
FASLG	birinapant	0.0272624	0.715427	356
FASLG	blebbistatin	-0.0209607	0.984351	356
FASLG	bleomycin A2	-0.032279	0.60094	356
FASLG	bortezomib	-0.074133	0.0657452	356
FASLG	bosutinib	-0.0912184	0.0256757	356
FASLG	brefeldin A	-0.13901	0.00105961	356
FASLG	brivanib	-0.0994453	0.0135438	356
FASLG	cabozantinib	-0.000581328	0.992135	356
FASLG	canertinib	-0.0862985	0.0540141	356
FASLG	cediranib	0.0130085	0.939963	356
FASLG	ceranib-2	-0.0253654	0.540375	356
FASLG	cerulenin	-0.0412683	0.311982	356
FASLG	chlorambucil	-0.018946	0.665646	356
FASLG	ciclopirox	-0.145395	9.4971e-05	356
FASLG	ciclosporin	-0.0533485	0.335153	356
FASLG	cimetidine	0.0204813	0.99382	356
FASLG	clofarabine	-0.0937686	0.0135137	356
FASLG	crizotinib	-0.0441579	0.285879	356
FASLG	cucurbitacin I	-0.0163392	0.729251	356
FASLG	curcumin	-0.0568247	0.155766	356
FASLG	cyanoquinoline 11	-0.0691108	0.433375	356
FASLG	cyclophosphamide	-0.0356384	0.993392	356
FASLG	cytarabine hydrochloride	-0.139993	0.00018412	356
FASLG	cytochalasin B	0.0687452	0.17034	356
FASLG	dabrafenib	-0.0646561	0.405458	356
FASLG	dacarbazine	-0.081309	0.0389891	356
FASLG	daporinad	-0.0848545	0.0582907	356
FASLG	darinaparsin	0.0836866	0.198634	356
FASLG	dasatinib	0.0108621	0.857518	356
FASLG	decitabine	-0.126756	0.000751643	356
FASLG	dexamethasone	-0.0949331	0.0233088	356
FASLG	dinaciclib	-0.0961954	0.0936496	356
FASLG	docetaxel	-0.0667526	0.289444	356
FASLG	doxorubicin	-0.0530815	0.171893	356
FASLG	elocalcitol	-0.12805	0.000936171	356
FASLG	entinostat	-0.058038	0.147022	356
FASLG	epigallocatechin-3-monogallate	0.0119263	0.828611	356
FASLG	erastin	0.00107987	0.983088	356
FASLG	erismodegib	-0.046896	0.556961	356
FASLG	erlotinib	-0.0493793	0.294382	356
FASLG	etomoxir	0.0289457	0.967698	356
FASLG	etoposide	-0.0382184	0.342958	356
FASLG	fingolimod	-0.122643	0.00173459	356
FASLG	fluorouracil	-0.183837	1.2032e-06	356
FASLG	fluvastatin	0.0946669	0.0500905	356
FASLG	foretinib	-0.0137846	0.79026	356
FASLG	fulvestrant	-0.0126126	0.980681	356
FASLG	fumonisin B1	0.0149475	0.846519	356
FASLG	gefitinib	-0.0515229	0.325584	356
FASLG	gemcitabine	-0.10331	0.0102081	356
FASLG	gossypol	-0.0422759	0.319458	356
FASLG	hyperforin	-0.0525861	0.529744	356
FASLG	ibrutinib	-0.0945378	0.0880692	356
FASLG	ifosfamide	-0.0141723	0.956183	356
FASLG	imatinib	-0.112236	0.00661679	356
FASLG	importazole	-0.0283715	0.681105	356
FASLG	indisulam	-0.0455242	0.27729	356
FASLG	isoevodiamine	-0.0487479	0.218645	356
FASLG	isoliquiritigenin	-0.00646144	0.948744	356
FASLG	isonicotinohydroxamic acid	-0.0444368	0.98038	356
FASLG	istradefylline	-0.017781	0.934234	356
FASLG	itraconazole	0.0121278	0.896902	356
FASLG	lapatinib	-0.0732988	0.100455	356
FASLG	lenvatinib	0.0324272	0.51796	356
FASLG	leptomycin B	-0.0678359	0.076451	356
FASLG	linifanib	-0.106678	0.00589222	356
FASLG	linsitinib	-0.104786	0.0126174	356
FASLG	lomeguatrib	0.0123749	0.85649	356
FASLG	lovastatin	0.100016	0.0303241	356
FASLG	manumycin A	-0.0274576	0.502671	356
FASLG	marinopyrrole A	-0.0806971	0.117902	356
FASLG	masitinib	-0.058659	0.170691	356
FASLG	methotrexate	-0.0993379	0.0156194	356
FASLG	methylstat	-0.0223008	0.681398	356
FASLG	mitomycin	-0.0967842	0.0127212	356
FASLG	momelotinib	-0.0515553	0.224757	356
FASLG	myricetin	-0.118649	0.276463	356
FASLG	myriocin	0.0596201	0.901258	356
FASLG	nakiterpiosin	-0.0427335	0.293483	356
FASLG	narciclasine	-0.128026	0.000856327	356
FASLG	navitoclax	0.00552739	0.918589	356
FASLG	necrostatin-1	-0.0241868	0.647733	356
FASLG	necrostatin-7	-0.0785522	0.0783452	356
FASLG	necrosulfonamide	-0.0594803	0.227993	356
FASLG	nelarabine	-0.0618174	0.747787	356
FASLG	neopeltolide	-0.0405049	0.70825	356
FASLG	neratinib	-0.115111	0.00543515	356
FASLG	neuronal differentiation inducer III	-0.127953	0.00083299	356
FASLG	niclosamide	0.0326153	0.500711	356
FASLG	nilotinib	0.00715408	0.953302	356
FASLG	nintedanib	-0.0238042	0.709666	356
FASLG	nutlin-3	-0.0309429	0.482048	356
FASLG	obatoclax	-0.0938817	0.0157127	356
FASLG	olaparib	0.0423408	0.320751	356
FASLG	oligomycin A	-0.0527549	0.202787	356
FASLG	omacetaxine mepesuccinate	-0.088967	0.0540151	356
FASLG	ouabain	-0.0725009	0.0621108	356
FASLG	paclitaxel	-0.0599985	0.13462	356
FASLG	palmostatin B	0.0600347	0.57689	356
FASLG	pandacostat	-0.0634754	0.172928	356
FASLG	panobinostat	-0.0990877	0.00919723	356
FASLG	parbendazole	-0.0874339	0.0206824	356
FASLG	parthenolide	-0.0997216	0.0577402	356
FASLG	pazopanib	-0.0425794	0.31101	356
FASLG	pevonedistat	-0.0483376	0.249177	356
FASLG	phloretin	-0.0291069	0.494201	356
FASLG	pifithrin-alpha	0.0149658	0.85281	356
FASLG	pifithrin-mu	-0.0467074	0.263508	356
FASLG	piperlongumine	-0.0779343	0.0429635	356
FASLG	pitstop2	0.0929795	0.554769	356
FASLG	pluripotin	-0.0326287	0.549398	356
FASLG	procarbazine	-0.0605598	0.703836	356
FASLG	prochlorperazine	-0.0380723	0.445306	356
FASLG	purmorphamine	-0.0317808	0.529579	356
FASLG	pyrazolanthrone	-1.6503e-05	0.999787	356
FASLG	quizartinib	0.0273748	0.685225	356
FASLG	regorafenib	-0.0674109	0.169644	356
FASLG	rigosertib	-0.0470286	0.252111	356
FASLG	ruxolitinib	7.6614e-05	0.99883	356
FASLG	salermide	-0.0415722	0.692944	356
FASLG	saracatinib	-0.0275035	0.61633	356
FASLG	selumetinib	-0.088032	0.0563756	356
FASLG	semagacestat	0.114845	0.226279	356
FASLG	serdemetan	-0.0689289	0.0944178	356
FASLG	sildenafil	-0.0502365	0.686804	356
FASLG	silmitasertib	-0.00506745	0.967874	356
FASLG	simvastatin	0.140103	0.00622316	356
FASLG	sirolimus	-0.0899739	0.0231678	356
FASLG	sitagliptin	0.00709539	0.997718	356
FASLG	skepinone-L	-0.102344	0.100309	356
FASLG	sorafenib	-0.0659542	0.132097	356
FASLG	sotrastaurin	-0.0936533	0.0465404	356
FASLG	spautin-1	-0.0958575	0.0409069	356
FASLG	staurosporine	0.180445	0.0836108	356
FASLG	sunitinib	-0.0559159	0.179373	356
FASLG	tacedinaline	-0.0838296	0.0767756	356
FASLG	tacrolimus	0.0290795	0.539911	356
FASLG	tamatinib	0.0396159	0.640895	356
FASLG	tamoxifen	-0.0506242	0.446408	356
FASLG	tandutinib	-0.0597594	0.185241	356
FASLG	tanespimycin	-0.135168	0.00465502	356
FASLG	temozolomide	-0.0420295	0.529801	356
FASLG	temsirolimus	-0.0979343	0.112016	356
FASLG	teniposide	-0.0568554	0.318184	356
FASLG	thalidomide	-0.00182508	0.995805	356
FASLG	tigecycline	-0.0479057	0.462189	356
FASLG	tipifarnib-P1	-0.157768	4.6377e-05	356
FASLG	tipifarnib-P2	-0.0227664	0.719222	356
FASLG	tivantinib	-0.0863713	0.14052	356
FASLG	tivozanib	-0.036563	0.48257	356
FASLG	topotecan	-0.0613251	0.115559	356
FASLG	tosedostat	-0.0324648	0.486416	356
FASLG	tozasertib	-0.0592145	0.76445	356
FASLG	trametinib	-0.142569	0.036088	356
FASLG	tretinoin	-0.0161487	0.732551	356
FASLG	triazolothiadiazine	-0.0573772	0.13697	356
FASLG	trifluoperazine	-0.063166	0.213197	356
FASLG	triptolide	-0.0790061	0.0472937	356
FASLG	tubastatin A	0.0192262	0.791967	356
FASLG	valdecoxib	-0.108564	0.00661909	356
FASLG	vandetanib	-0.0225801	0.704779	356
FASLG	veliparib	0.0826228	0.243419	356
FASLG	vemurafenib	0.00735944	0.923284	356
FASLG	vincristine	-0.0742881	0.0480877	356
FASLG	vorapaxar	0.000510008	0.994163	356
FASLG	vorinostat	-0.0762265	0.0514998	356
FASLG	zebularine	-0.0890073	0.0253128	356
MLKL	16-beta-bromoandrosterone	0.098313	0.0335443	197259
MLKL	1S,3R-RSL-3	0.11187	0.00477076	197259
MLKL	3-Cl-AHPC	-0.0963117	0.0132266	197259
MLKL	968	0.00419188	0.999953	197259
MLKL	A-804598	0.0618779	0.688854	197259
MLKL	AA-COCF3	0.0590081	0.166088	197259
MLKL	ABT-199	0.0773767	0.168809	197259
MLKL	ABT-737	0.124341	0.00350756	197259
MLKL	AC55649	0.0045895	0.982392	197259
MLKL	AGK-2	-0.0461831	0.900753	197259
MLKL	AM-580	0.0257215	0.668669	197259
MLKL	AT-406	-0.0561434	0.593652	197259
MLKL	AT13387	0.0234041	0.720829	197259
MLKL	AT7867	0.10658	0.00829436	197259
MLKL	AZ-3146	-0.00882541	0.860114	197259
MLKL	AZD1480	0.169005	0.00942532	197259
MLKL	AZD4547	0.112828	0.0107503	197259
MLKL	AZD6482	0.098268	0.0539999	197259
MLKL	AZD7545	-0.020203	0.67972	197259
MLKL	AZD7762	-0.0602944	0.129755	197259
MLKL	AZD8055	0.0572214	0.165292	197259
MLKL	B02	0.0938067	0.020455	197259
MLKL	BCL-LZH-4	-0.0161362	0.955841	197259
MLKL	BEC	-0.0510715	0.999979	197259
MLKL	BI-2536	0.0534928	0.16577	197259
MLKL	BIBR-1532	0.0427393	0.386951	197259
MLKL	BIRB-796	0.0872431	0.050443	197259
MLKL	BIX-01294	0.163157	1.9157e-05	197259
MLKL	BMS-195614	0.0167558	0.826174	197259
MLKL	BMS-270394	0.0664592	0.146043	197259
MLKL	BMS-345541	-0.0170525	0.692244	197259
MLKL	BMS-536924	-0.113989	0.0161673	197259
MLKL	BMS-754807	-0.00159179	0.979017	197259
MLKL	BRD-A02303741	0.0726063	0.165655	197259
MLKL	BRD-A05715709	0.0183008	0.917592	197259
MLKL	BRD-A71883111	0.0179685	0.721569	197259
MLKL	BRD-A86708339	0.139547	0.018214	197259
MLKL	BRD-A94377914	0.0968166	0.089074	197259
MLKL	BRD-K01737880	0.0907078	0.684569	197259
MLKL	BRD-K02251932	0.0762057	0.124082	197259
MLKL	BRD-K02492147	0.0217105	0.74944	197259
MLKL	BRD-K04800985	0.0142102	0.999311	197259
MLKL	BRD-K09344309	-0.0110956	0.989119	197259
MLKL	BRD-K09587429	-0.01144	0.8871	197259
MLKL	BRD-K11533227	0.0706162	0.109299	197259
MLKL	BRD-K13999467	0.0606066	0.168925	197259
MLKL	BRD-K14844214	0.0612833	0.367587	197259
MLKL	BRD-K16147474	0.00584861	0.99263	197259
MLKL	BRD-K17060750	0.00126968	0.986586	197259
MLKL	BRD-K19103580	0.00087953	0.988841	197259
MLKL	BRD-K24690302	0.142165	0.000469915	197259
MLKL	BRD-K26531177	0.135797	0.000763017	197259
MLKL	BRD-K27224038	-0.0418014	0.892023	197259
MLKL	BRD-K27986637	-0.0358065	0.852512	197259
MLKL	BRD-K28456706	0.0721945	0.0866885	197259
MLKL	BRD-K29086754	-0.0597506	0.792511	197259
MLKL	BRD-K29313308	0.0345456	0.453292	197259
MLKL	BRD-K30019337	0.0393387	0.915737	197259
MLKL	BRD-K30748066	0.0535726	0.798849	197259
MLKL	BRD-K33199242	-0.0670173	0.944353	197259
MLKL	BRD-K33514849	0.0889417	0.999288	197259
MLKL	BRD-K34099515	0.0423412	0.963959	197259
MLKL	BRD-K34222889	0.146371	0.00010684	197259
MLKL	BRD-K34485477	0.122781	0.998562	197259
MLKL	BRD-K35604418	0.150839	0.000101375	197259
MLKL	BRD-K37390332	0.0784341	0.604425	197259
MLKL	BRD-K41334119	-0.0804586	0.896142	197259
MLKL	BRD-K41597374	0.0349595	0.420491	197259
MLKL	BRD-K42260513	0.0780499	0.973398	197259
MLKL	BRD-K44224150	0.0323706	0.994574	197259
MLKL	BRD-K45681478	0.115102	0.00729006	197259
MLKL	BRD-K48334597	0.0282261	0.847453	197259
MLKL	BRD-K48477130	0.0783573	0.690021	197259
MLKL	BRD-K49290616	0.0820155	0.830295	197259
MLKL	BRD-K50799972	-0.0283306	0.728157	197259
MLKL	BRD-K51490254	0.143483	0.000495028	197259
MLKL	BRD-K51831558	0.0536167	0.467833	197259
MLKL	BRD-K52037352	0.00252573	0.975509	197259
MLKL	BRD-K55116708	0.00855848	0.880691	197259
MLKL	BRD-K61166597	0.07616	0.0604735	197259
MLKL	BRD-K63431240	-0.127478	0.00181869	197259
MLKL	BRD-K64610608	0.0768021	0.461196	197259
MLKL	BRD-K66453893	0.0608441	0.121703	197259
MLKL	BRD-K66532283	0.0491617	0.242075	197259
MLKL	BRD-K70511574	0.0344895	0.398191	197259
MLKL	BRD-K71781559	0.065244	0.950041	197259
MLKL	BRD-K75293299	0.0883386	0.726276	197259
MLKL	BRD-K78574327	-0.0317471	0.982295	197259
MLKL	BRD-K80183349	0.090865	0.0221204	197259
MLKL	BRD-K84807411	-0.0288376	0.937919	197259
MLKL	BRD-K85133207	-0.000383368	0.994941	197259
MLKL	BRD-K86535717	-0.0283748	0.951075	197259
MLKL	BRD-K88742110	0.0874387	0.0353656	197259
MLKL	BRD-K90370028	0.106964	0.748012	197259
MLKL	BRD-K92856060	0.178985	6.41964e-06	197259
MLKL	BRD-K96431673	0.0085495	0.998646	197259
MLKL	BRD-K96970199	-0.030159	0.998764	197259
MLKL	BRD-K97651142	0.00459854	0.925457	197259
MLKL	BRD-K99006945	0.00629948	0.944629	197259
MLKL	BRD-M00053801	0.112496	0.188716	197259
MLKL	BRD1378	0.0097767	0.949597	197259
MLKL	BRD1812	0.150283	0.000122449	197259
MLKL	BRD1835	-0.0310335	0.55362	197259
MLKL	BRD4132	0.000263374	0.997266	197259
MLKL	BRD5468	-0.00962104	0.938167	197259
MLKL	BRD6340	-0.0247131	0.567134	197259
MLKL	BRD8899	0.0466673	0.664604	197259
MLKL	BRD8958	0.0144482	0.984085	197259
MLKL	BRD9647	0.0795266	0.104069	197259
MLKL	BRD9876	0.0299274	0.659618	197259
MLKL	BYL-719	0.059058	0.387056	197259
MLKL	Bax channel blocker	0.0675291	0.135401	197259
MLKL	C6-ceramide	-0.0613788	0.551325	197259
MLKL	CAL-101	0.0577943	0.328563	197259
MLKL	CAY10576	0.0122599	0.897391	197259
MLKL	CAY10594	0.00618768	0.938808	197259
MLKL	CAY10618	0.144821	0.000160824	197259
MLKL	CBB-1007	0.0373783	0.85072	197259
MLKL	CCT036477	0.169209	8.93473e-06	197259
MLKL	CD-1530	0.00892783	0.899566	197259
MLKL	CD-437	-0.0592872	0.137014	197259
MLKL	CHIR-99021	-0.0295558	0.524745	197259
MLKL	CHM-1	0.0209363	0.614084	197259
MLKL	CI-976	-0.00145998	0.994744	197259
MLKL	CID-5951923	0.0273136	0.78247	197259
MLKL	CIL41	0.152838	0.0180321	197259
MLKL	CIL55	0.0297722	0.907523	197259
MLKL	CIL55A	0.0715312	0.251653	197259
MLKL	CIL56	0.0140921	0.841251	197259
MLKL	CIL70	0.210776	0.000106848	197259
MLKL	COL-3	-0.0121767	0.814523	197259
MLKL	CR-1-31B	0.0159989	0.695162	197259
MLKL	Ch-55	0.0597898	0.218885	197259
MLKL	Compound 1541A	0.0263446	0.720474	197259
MLKL	Compound 23 citrate	0.0321214	0.44526	197259
MLKL	Compound 7d-cis	0.199153	1.44766e-06	197259
MLKL	DBeQ	0.128018	0.00229502	197259
MLKL	DNMDP	-0.00126127	0.990224	197259
MLKL	ELCPK	0.0552799	0.389384	197259
MLKL	ETP-46464	0.0539875	0.337294	197259
MLKL	EX-527	0.139299	0.196114	197259
MLKL	FGIN-1-27	0.0143462	0.930564	197259
MLKL	FQI-1	-9.5221e-05	0.998633	197259
MLKL	FQI-2	0.0343896	0.396968	197259
MLKL	FSC231	0.0563582	0.99945	197259
MLKL	GANT-61	0.0597325	0.300248	197259
MLKL	GDC-0879	-0.109581	0.021011	197259
MLKL	GDC-0941	0.051774	0.26692	197259
MLKL	GMX-1778	0.165435	2.1763e-05	197259
MLKL	GSK-3 inhibitor IX	0.0319559	0.490086	197259
MLKL	GSK-J4	0.281666	0.0591024	197259
MLKL	GSK1059615	0.067667	0.802116	197259
MLKL	GSK2636771	0.0970107	0.256653	197259
MLKL	GSK4112	0.014666	0.808167	197259
MLKL	GSK461364	0.0125852	0.766063	197259
MLKL	GSK525762A	0.0205872	0.622326	197259
MLKL	GW-405833	0.0360632	0.380569	197259
MLKL	GW-843682X	0.0244832	0.587671	197259
MLKL	HBX-41108	0.0921531	0.0879018	197259
MLKL	HC-067047	0.0452725	0.470384	197259
MLKL	HLI 373	0.0524489	0.227998	197259
MLKL	I-BET151	0.0393231	0.321509	197259
MLKL	IC-87114	-0.0524272	0.429556	197259
MLKL	IPR-456	0.0714197	0.546635	197259
MLKL	ISOX	0.129139	0.000719995	197259
MLKL	IU1	0.0494758	0.584322	197259
MLKL	JQ-1	0.0799513	0.0381737	197259
MLKL	JW-480	-0.000731228	0.998412	197259
MLKL	JW-55	0.0451562	0.751131	197259
MLKL	JW-74	0.100716	0.186349	197259
MLKL	KH-CB19	0.0266238	0.827972	197259
MLKL	KHS101	0.00854914	0.86317	197259
MLKL	KPT185	0.138344	0.00204862	197259
MLKL	KU 0060648	0.0656941	0.113122	197259
MLKL	KU-0063794	0.0481604	0.254905	197259
MLKL	KU-55933	-0.0126112	0.802878	197259
MLKL	KU-60019	0.0307906	0.468325	197259
MLKL	KW-2449	0.0467884	0.24718	197259
MLKL	KX2-391	0.0678222	0.0849881	197259
MLKL	Ki8751	0.102	0.0162082	197259
MLKL	Ko-143	0.0326933	0.450282	197259
MLKL	L-685458	-0.00509108	0.951829	197259
MLKL	LE-135	-0.0218915	0.655796	197259
MLKL	LRRK2-IN-1	0.119847	0.00887986	197259
MLKL	LY-2157299	-0.150747	0.439307	197259
MLKL	LY-2183240	0.119068	0.001609	197259
MLKL	MG-132	0.148301	0.0530447	197259
MLKL	MGCD-265	0.0721422	0.0697613	197259
MLKL	MI-1	-0.00758176	0.952375	197259
MLKL	MI-2	0.115813	0.0771808	197259
MLKL	MK-0752	0.0608344	0.388038	197259
MLKL	MK-1775	0.022165	0.607957	197259
MLKL	MK-2206	0.150492	0.000286786	197259
MLKL	ML006	-0.00491236	0.941485	197259
MLKL	ML029	0.0643263	0.153464	197259
MLKL	ML031	0.159955	0.000132366	197259
MLKL	ML050	0.129237	0.00172265	197259
MLKL	ML083	0.028447	0.83743	197259
MLKL	ML162	0.153689	0.000101082	197259
MLKL	ML203	0.0619772	0.232808	197259
MLKL	ML210	0.127637	0.00141331	197259
MLKL	ML239	0.12269	0.00258619	197259
MLKL	ML258	0.075453	0.437457	197259
MLKL	ML311	0.00593462	0.890681	197259
MLKL	ML312	-0.031628	0.992194	197259
MLKL	ML320	-0.0250461	0.634911	197259
MLKL	ML334 diastereomer	0.0265037	0.755215	197259
MLKL	MLN2238	-0.00843529	0.853974	197259
MLKL	MLN2480	0.180453	0.0225892	197259
MLKL	MST-312	0.115612	0.00270354	197259
MLKL	Mdivi-1	-0.0278753	0.543528	197259
MLKL	Merck60	0.0391091	0.332414	197259
MLKL	N9-isopropylolomoucine	-0.0243162	0.585779	197259
MLKL	NPC-26	-0.0166041	0.910736	197259
MLKL	NSC 74859	0.0160174	0.801252	197259
MLKL	NSC19630	0.160754	0.000572418	197259
MLKL	NSC23766	0.105404	0.0088391	197259
MLKL	NSC30930	0.0258991	0.759946	197259
MLKL	NSC48300	0.122933	0.0014296	197259
MLKL	NSC632839	0.0446077	0.26729	197259
MLKL	NSC95397	0.177822	8.96881e-06	197259
MLKL	NVP-231	-0.036074	0.384633	197259
MLKL	NVP-ADW742	0.0956149	0.0262324	197259
MLKL	NVP-BEZ235	0.0808853	0.10907	197259
MLKL	NVP-BSK805	0.0711607	0.0798032	197259
MLKL	NVP-TAE684	-0.0280063	0.602905	197259
MLKL	O-6-benzylguanine	0.00164675	0.993824	197259
MLKL	OSI-027	0.0661727	0.12588	197259
MLKL	OSI-930	0.0128891	0.800001	197259
MLKL	PAC-1	0.0943001	0.0186258	197259
MLKL	PD 153035	-0.133581	0.0102076	197259
MLKL	PD318088	-0.211901	1.52952e-07	197259
MLKL	PDMP	0.0829221	0.0515204	197259
MLKL	PF-184	0.0109092	0.80608	197259
MLKL	PF-3758309	0.0532078	0.368949	197259
MLKL	PF-4800567 hydrochloride	0.0514331	0.999586	197259
MLKL	PF-543	0.0136942	0.804959	197259
MLKL	PF-573228	6.51717e-06	0.999915	197259
MLKL	PF-750	0.0445768	0.370377	197259
MLKL	PHA-793887	0.0272911	0.50008	197259
MLKL	PI-103	0.24055	4.5764e-10	197259
MLKL	PIK-93	0.0800875	0.0550378	197259
MLKL	PL-DI	0.128788	0.000792561	197259
MLKL	PLX-4720	0.0482624	0.51422	197259
MLKL	PRIMA-1	0.226544	3.15842e-09	197259
MLKL	PRIMA-1-Met	0.0329949	0.679721	197259
MLKL	PRL-3 inhibitor I	0.0709256	0.509851	197259
MLKL	PX-12	0.162168	1.764e-05	197259
MLKL	PYR-41	0.0763765	0.139104	197259
MLKL	QS-11	0.00862669	0.981474	197259
MLKL	QW-BI-011	0.024017	0.828572	197259
MLKL	R428	0.0896812	0.077091	197259
MLKL	RAF265	0.0425696	0.474618	197259
MLKL	RG-108	0.141995	0.000589762	197259
MLKL	RITA	0.0418709	0.344872	197259
MLKL	RO4929097	-0.00113246	0.992222	197259
MLKL	Repligen 136	0.0998667	0.0185671	197259
MLKL	SB-225002	0.106639	0.00465976	197259
MLKL	SB-431542	0.000641913	0.996755	197259
MLKL	SB-525334	0.130127	0.00422405	197259
MLKL	SB-743921	0.0545666	0.159201	197259
MLKL	SCH-529074	0.152365	0.000465755	197259
MLKL	SCH-79797	0.0238283	0.578564	197259
MLKL	SGX-523	0.00937413	0.90894	197259
MLKL	SID 26681509	0.138981	0.00123903	197259
MLKL	SJ-172550	0.0241019	0.85972	197259
MLKL	SKI-II	0.0922188	0.0334334	197259
MLKL	SMER-3	0.129738	0.00291303	197259
MLKL	SN-38	-0.0289025	0.561109	197259
MLKL	SNS-032	0.0285729	0.521344	197259
MLKL	SNX-2112	-0.0749086	0.050166	197259
MLKL	SR-II-138A	-5.0276e-05	0.999044	197259
MLKL	SR1001	0.0325442	0.675158	197259
MLKL	SR8278	0.0847409	0.815983	197259
MLKL	SRT-1720	0.0943715	0.0312955	197259
MLKL	STF-31	0.119429	0.00271666	197259
MLKL	SU11274	0.0141277	0.760226	197259
MLKL	SZ4TA2	0.110568	0.259808	197259
MLKL	StemRegenin 1	-0.00452856	0.923128	197259
MLKL	TG-100-115	0.184169	3.7589e-05	197259
MLKL	TG-101348	0.0480468	0.26043	197259
MLKL	TGX-221	0.0381879	0.631005	197259
MLKL	TPCA-1	-0.05187	0.20974	197259
MLKL	TW-37	0.02414	0.589146	197259
MLKL	UNC0321	-0.000878392	0.997084	197259
MLKL	UNC0638	0.0959561	0.0219715	197259
MLKL	VAF-347	-0.0845192	0.168764	197259
MLKL	VER-155008	-0.08401	0.0444254	197259
MLKL	VU0155056	-0.00581849	0.993888	197259
MLKL	WAY-362450	-0.0307088	0.998521	197259
MLKL	WP1130	0.0661799	0.11053	197259
MLKL	WZ4002	0.0447194	0.551906	197259
MLKL	WZ8040	0.0126536	0.842125	197259
MLKL	XL765	0.067882	0.222695	197259
MLKL	YK 4-279	0.0670535	0.0865105	197259
MLKL	YM-155	0.146256	0.00102318	197259
MLKL	ZSTK474	0.0812965	0.113981	197259
MLKL	abiraterone	-0.0232985	0.894162	197259
MLKL	afatinib	-0.0854066	0.0625755	197259
MLKL	alisertib	0.0392072	0.344703	197259
MLKL	alvocidib	0.0751323	0.207723	197259
MLKL	apicidin	0.116949	0.00193633	197259
MLKL	austocystin D	-0.1118	0.0123263	197259
MLKL	avicin D	-0.00199335	0.987389	197259
MLKL	avrainvillamide	0.172981	0.000205154	197259
MLKL	axitinib	0.124901	0.0011719	197259
MLKL	azacitidine	-0.0880849	0.0585301	197259
MLKL	bafilomycin A1	-0.0350242	0.964677	197259
MLKL	barasertib	0.058388	0.15398	197259
MLKL	bardoxolone methyl	0.00680177	0.88946	197259
MLKL	belinostat	0.143902	0.00953656	197259
MLKL	bendamustine	0.098301	0.0208683	197259
MLKL	betulinic acid	-0.074075	0.608201	197259
MLKL	bexarotene	0.033477	0.472572	197259
MLKL	birinapant	-0.103865	0.0627173	197259
MLKL	blebbistatin	-0.120833	0.854172	197259
MLKL	bleomycin A2	-0.124817	0.0100192	197259
MLKL	bortezomib	0.0492438	0.235798	197259
MLKL	bosutinib	-0.123058	0.00220959	197259
MLKL	brefeldin A	0.0131437	0.801287	197259
MLKL	brivanib	0.0376868	0.37985	197259
MLKL	cabozantinib	0.00403974	0.950514	197259
MLKL	canertinib	-0.0269566	0.605343	197259
MLKL	cediranib	0.143411	0.129752	197259
MLKL	ceranib-2	0.0926066	0.0155253	197259
MLKL	cerulenin	0.16882	8.57708e-06	197259
MLKL	chlorambucil	-0.00967091	0.82904	197259
MLKL	ciclopirox	0.0619473	0.107336	197259
MLKL	ciclosporin	-0.0487315	0.38481	197259
MLKL	cimetidine	0.0313037	0.986313	197259
MLKL	clofarabine	-0.0705482	0.0665294	197259
MLKL	crizotinib	0.00271661	0.953839	197259
MLKL	cucurbitacin I	0.14863	0.00016958	197259
MLKL	curcumin	0.0621247	0.118744	197259
MLKL	cyanoquinoline 11	0.0358216	0.728439	197259
MLKL	cyclophosphamide	0.081757	0.993392	197259
MLKL	cytarabine hydrochloride	-0.0321903	0.422604	197259
MLKL	cytochalasin B	0.0392356	0.477319	197259
MLKL	dabrafenib	0.027013	0.76029	197259
MLKL	dacarbazine	-0.0344127	0.406927	197259
MLKL	daporinad	0.101326	0.0213379	197259
MLKL	darinaparsin	0.0808929	0.215844	197259
MLKL	dasatinib	-0.0743348	0.103463	197259
MLKL	decitabine	-0.0340572	0.395946	197259
MLKL	dexamethasone	0.0931244	0.0262131	197259
MLKL	dinaciclib	0.125758	0.0259422	197259
MLKL	docetaxel	-0.0119016	0.866536	197259
MLKL	doxorubicin	0.0907096	0.0164541	197259
MLKL	elocalcitol	-0.0204771	0.627121	197259
MLKL	entinostat	0.0900227	0.0211317	197259
MLKL	epigallocatechin-3-monogallate	0.0727102	0.110461	197259
MLKL	erastin	0.0525401	0.237076	197259
MLKL	erismodegib	0.00560099	0.962728	197259
MLKL	erlotinib	-0.162783	5.3043e-05	197259
MLKL	etomoxir	-0.040882	0.948445	197259
MLKL	etoposide	0.0625521	0.110869	197259
MLKL	fingolimod	0.0558015	0.172189	197259
MLKL	fluorouracil	-0.127823	0.000866286	197259
MLKL	fluvastatin	0.0390795	0.492267	197259
MLKL	foretinib	0.0652891	0.130939	197259
MLKL	fulvestrant	-0.0191226	0.972235	197259
MLKL	fumonisin B1	-0.0108693	0.892465	197259
MLKL	gefitinib	-0.0816756	0.0887825	197259
MLKL	gemcitabine	-0.0541106	0.193709	197259
MLKL	gossypol	0.0729833	0.0746803	197259
MLKL	hyperforin	-0.0307253	0.761576	197259
MLKL	ibrutinib	0.0464732	0.455752	197259
MLKL	ifosfamide	-0.0505763	0.811137	197259
MLKL	imatinib	0.0173551	0.720974	197259
MLKL	importazole	-0.0017236	0.98582	197259
MLKL	indisulam	0.0508604	0.221072	197259
MLKL	isoevodiamine	0.0766378	0.0473114	197259
MLKL	isoliquiritigenin	-0.0264373	0.791613	197259
MLKL	isonicotinohydroxamic acid	0.0486802	0.976311	197259
MLKL	istradefylline	0.0938348	0.509838	197259
MLKL	itraconazole	-0.00872454	0.92728	197259
MLKL	lapatinib	-0.068146	0.129933	197259
MLKL	lenvatinib	0.186907	3.3878e-06	197259
MLKL	leptomycin B	-0.0145677	0.725953	197259
MLKL	linifanib	-0.0203165	0.637187	197259
MLKL	linsitinib	0.0634679	0.149854	197259
MLKL	lomeguatrib	-0.00911976	0.897128	197259
MLKL	lovastatin	-0.043919	0.411894	197259
MLKL	manumycin A	0.132307	0.000484221	197259
MLKL	marinopyrrole A	0.064107	0.222504	197259
MLKL	masitinib	0.0575375	0.179766	197259
MLKL	methotrexate	-0.138834	0.000600141	197259
MLKL	methylstat	0.185199	6.3428e-05	197259
MLKL	mitomycin	0.0299008	0.47442	197259
MLKL	momelotinib	0.00848059	0.859582	197259
MLKL	myricetin	0.0885847	0.406078	197259
MLKL	myriocin	-0.11596	0.821816	197259
MLKL	nakiterpiosin	-0.000203546	0.996564	197259
MLKL	narciclasine	0.00693789	0.871719	197259
MLKL	navitoclax	0.0843534	0.0448413	197259
MLKL	necrostatin-1	0.0710685	0.127768	197259
MLKL	necrostatin-7	0.0563863	0.224393	197259
MLKL	necrosulfonamide	0.179731	0.000100528	197259
MLKL	nelarabine	-0.0456812	0.840556	197259
MLKL	neopeltolide	-0.0717335	0.472474	197259
MLKL	neratinib	-0.0653487	0.136236	197259
MLKL	neuronal differentiation inducer III	0.0834126	0.0324801	197259
MLKL	niclosamide	0.120032	0.00376653	197259
MLKL	nilotinib	0.0252993	0.791779	197259
MLKL	nintedanib	0.0386608	0.505699	197259
MLKL	nutlin-3	0.111813	0.00508347	197259
MLKL	obatoclax	0.115493	0.00266772	197259
MLKL	olaparib	0.12875	0.000977507	197259
MLKL	oligomycin A	0.0847678	0.0348385	197259
MLKL	omacetaxine mepesuccinate	0.108742	0.0172491	197259
MLKL	ouabain	0.116307	0.00223406	197259
MLKL	paclitaxel	0.0325464	0.434759	197259
MLKL	palmostatin B	0.0159203	0.914421	197259
MLKL	pandacostat	0.0206612	0.68955	197259
MLKL	panobinostat	0.140007	0.000188179	197259
MLKL	parbendazole	0.0426271	0.276356	197259
MLKL	parthenolide	0.12443	0.0149132	197259
MLKL	pazopanib	0.0658021	0.107492	197259
MLKL	pevonedistat	-0.0808456	0.045834	197259
MLKL	phloretin	0.0913325	0.0208957	197259
MLKL	pifithrin-alpha	-0.0326698	0.632137	197259
MLKL	pifithrin-mu	0.116509	0.00299903	197259
MLKL	piperlongumine	0.113436	0.00275515	197259
MLKL	pitstop2	0.0432437	0.827609	197259
MLKL	pluripotin	-0.0584318	0.235281	197259
MLKL	procarbazine	-0.0473062	0.783422	197259
MLKL	prochlorperazine	0.0686951	0.132387	197259
MLKL	purmorphamine	0.0505324	0.295631	197259
MLKL	pyrazolanthrone	-0.0927246	0.04435	197259
MLKL	quizartinib	0.0453896	0.461116	197259
MLKL	regorafenib	0.0250579	0.652217	197259
MLKL	rigosertib	0.0366459	0.379639	197259
MLKL	ruxolitinib	-0.10014	0.0147278	197259
MLKL	salermide	-0.0113625	0.932435	197259
MLKL	saracatinib	-0.133352	0.00161857	197259
MLKL	selumetinib	-0.205518	7.68925e-07	197259
MLKL	semagacestat	-0.0194975	0.907305	197259
MLKL	serdemetan	0.141086	0.000381513	197259
MLKL	sildenafil	0.0118902	0.947145	197259
MLKL	silmitasertib	0.026499	0.780905	197259
MLKL	simvastatin	-0.0304244	0.639332	197259
MLKL	sirolimus	0.11103	0.00459289	197259
MLKL	sitagliptin	0.000407944	0.999356	197259
MLKL	skepinone-L	0.105555	0.0895474	197259
MLKL	sorafenib	0.058774	0.184674	197259
MLKL	sotrastaurin	0.0661595	0.168693	197259
MLKL	spautin-1	-0.00142486	0.981719	197259
MLKL	staurosporine	-0.0195767	0.915831	197259
MLKL	sunitinib	0.0410799	0.336319	197259
MLKL	tacedinaline	0.166014	0.000266105	197259
MLKL	tacrolimus	0.0225828	0.642896	197259
MLKL	tamatinib	-0.00254804	0.982973	197259
MLKL	tamoxifen	0.054322	0.407059	197259
MLKL	tandutinib	0.107784	0.0117025	197259
MLKL	tanespimycin	-0.172897	0.000251076	197259
MLKL	temozolomide	0.0328482	0.646115	197259
MLKL	temsirolimus	0.0699662	0.275279	197259
MLKL	teniposide	0.000146488	0.998005	197259
MLKL	thalidomide	0.103029	0.513487	197259
MLKL	tigecycline	0.0402765	0.542536	197259
MLKL	tipifarnib-P1	0.102037	0.00961614	197259
MLKL	tipifarnib-P2	-0.0414689	0.493888	197259
MLKL	tivantinib	0.0960599	0.0984912	197259
MLKL	tivozanib	0.0426646	0.402691	197259
MLKL	topotecan	0.00969588	0.820919	197259
MLKL	tosedostat	0.0210243	0.665033	197259
MLKL	tozasertib	0.117626	0.511117	197259
MLKL	trametinib	-0.192816	0.00282208	197259
MLKL	tretinoin	0.054699	0.201863	197259
MLKL	triazolothiadiazine	0.0627532	0.102381	197259
MLKL	trifluoperazine	-0.0287512	0.622397	197259
MLKL	triptolide	-0.0616322	0.127237	197259
MLKL	tubastatin A	0.0915967	0.138265	197259
MLKL	valdecoxib	0.0761164	0.0613623	197259
MLKL	vandetanib	-0.0503778	0.335227	197259
MLKL	veliparib	0.016871	0.865399	197259
MLKL	vemurafenib	0.0622893	0.255371	197259
MLKL	vincristine	0.0825769	0.0274501	197259
MLKL	vorapaxar	0.0210491	0.697184	197259
MLKL	vorinostat	0.115373	0.00269456	197259
MLKL	zebularine	-0.0749597	0.0623	197259
RIPK1	16-beta-bromoandrosterone	0.0421242	0.406019	8737
RIPK1	1S,3R-RSL-3	0.0281834	0.524962	8737
RIPK1	3-Cl-AHPC	0.0606941	0.128639	8737
RIPK1	968	-0.098478	0.94876	8737
RIPK1	A-804598	0.0345247	0.853989	8737
RIPK1	AA-COCF3	0.0298505	0.506747	8737
RIPK1	ABT-199	0.0351386	0.567366	8737
RIPK1	ABT-737	0.00440807	0.937144	8737
RIPK1	AC55649	0.0205759	0.897137	8737
RIPK1	AGK-2	-0.0269536	0.948981	8737
RIPK1	AM-580	0.039309	0.48153	8737
RIPK1	AT-406	-0.172762	0.0560679	8737
RIPK1	AT13387	0.0509313	0.412363	8737
RIPK1	AT7867	-0.0768454	0.0639046	8737
RIPK1	AZ-3146	0.0592659	0.168257	8737
RIPK1	AZD1480	0.0551587	0.470293	8737
RIPK1	AZD4547	-0.0389254	0.439647	8737
RIPK1	AZD6482	0.000747011	0.993062	8737
RIPK1	AZD7545	-0.0312422	0.505819	8737
RIPK1	AZD7762	0.0155783	0.721907	8737
RIPK1	AZD8055	0.0442654	0.29076	8737
RIPK1	B02	0.0064245	0.891898	8737
RIPK1	BCL-LZH-4	-0.113903	0.533775	8737
RIPK1	BEC	-0.00874305	0.999979	8737
RIPK1	BI-2536	0.0714584	0.0604505	8737
RIPK1	BIBR-1532	0.0425473	0.389467	8737
RIPK1	BIRB-796	0.0301496	0.542804	8737
RIPK1	BIX-01294	-0.0604562	0.132173	8737
RIPK1	BMS-195614	0.0510559	0.415014	8737
RIPK1	BMS-270394	0.0223694	0.67256	8737
RIPK1	BMS-345541	-0.0189787	0.657585	8737
RIPK1	BMS-536924	0.0493705	0.368641	8737
RIPK1	BMS-754807	0.0916188	0.0351659	8737
RIPK1	BRD-A02303741	-0.00280073	0.970302	8737
RIPK1	BRD-A05715709	0.0662646	0.651291	8737
RIPK1	BRD-A71883111	0.0252722	0.604648	8737
RIPK1	BRD-A86708339	0.112921	0.0596465	8737
RIPK1	BRD-A94377914	-0.0430533	0.478999	8737
RIPK1	BRD-K01737880	0.273404	0.122252	8737
RIPK1	BRD-K02251932	0.0258024	0.656393	8737
RIPK1	BRD-K02492147	0.0207845	0.761762	8737
RIPK1	BRD-K04800985	-0.0151757	0.99881	8737
RIPK1	BRD-K09344309	0.134624	0.741442	8737
RIPK1	BRD-K09587429	0.014836	0.849817	8737
RIPK1	BRD-K11533227	0.0470286	0.30153	8737
RIPK1	BRD-K13999467	-0.00907962	0.864312	8737
RIPK1	BRD-K14844214	-0.0418984	0.582848	8737
RIPK1	BRD-K16147474	0.00743948	0.989893	8737
RIPK1	BRD-K17060750	0.0105616	0.865393	8737
RIPK1	BRD-K19103580	-0.0052259	0.934388	8737
RIPK1	BRD-K24690302	0.0209883	0.666498	8737
RIPK1	BRD-K26531177	-0.0417519	0.338421	8737
RIPK1	BRD-K27224038	-0.0575631	0.837539	8737
RIPK1	BRD-K27986637	-0.0905915	0.553412	8737
RIPK1	BRD-K28456706	0.0692191	0.102065	8737
RIPK1	BRD-K29086754	0.0557951	0.810504	8737
RIPK1	BRD-K29313308	-0.0124237	0.801804	8737
RIPK1	BRD-K30019337	-0.054121	0.866425	8737
RIPK1	BRD-K30748066	0.142356	0.435274	8737
RIPK1	BRD-K33199242	-0.0469417	0.948158	8737
RIPK1	BRD-K33514849	0.0724549	0.999288	8737
RIPK1	BRD-K34099515	0.0120805	0.992845	8737
RIPK1	BRD-K34222889	-0.000339795	0.993705	8737
RIPK1	BRD-K34485477	-0.118428	0.998562	8737
RIPK1	BRD-K35604418	0.0336222	0.428228	8737
RIPK1	BRD-K37390332	0.00856501	0.987995	8737
RIPK1	BRD-K41334119	-0.0977818	0.861587	8737
RIPK1	BRD-K41597374	0.0531224	0.204493	8737
RIPK1	BRD-K42260513	-0.0781156	0.973398	8737
RIPK1	BRD-K44224150	-0.0977869	0.963695	8737
RIPK1	BRD-K45681478	-0.0117665	0.825844	8737
RIPK1	BRD-K48334597	-0.0452962	0.735401	8737
RIPK1	BRD-K48477130	-0.0748768	0.701366	8737
RIPK1	BRD-K49290616	0.0406809	0.934626	8737
RIPK1	BRD-K50799972	-0.0513351	0.463291	8737
[truncated: 1,849 more rows]
