# Supplementary material for: Multi-omics analysis reveals the panoramic picture of necroptosis-related regulators in pan-cancer
Source: Aging (Albany NY). 2022 Jun 21;14(12):5034–58. doi: 10.18632/aging.204124 (PMC9271292; doi:10.18632/aging.204124)
Supplement: Supplementary Material 9 [file aging-14-204124-s009.xlsx]

## Sheet: SheetName
cancertype	barcode	type	gsva
ACC	TCGA-OR-A5J1-01A	tumor	-0.0835509
ACC	TCGA-OR-A5J2-01A	tumor	-0.422405
ACC	TCGA-OR-A5J3-01A	tumor	-0.0606644
ACC	TCGA-OR-A5J5-01A	tumor	-0.164188
ACC	TCGA-OR-A5J6-01A	tumor	-0.0595468
ACC	TCGA-OR-A5J7-01A	tumor	0.273958
ACC	TCGA-OR-A5J8-01A	tumor	0.399427
ACC	TCGA-OR-A5J9-01A	tumor	-0.102188
ACC	TCGA-OR-A5JA-01A	tumor	-0.165989
ACC	TCGA-OR-A5JB-01A	tumor	0.575498
ACC	TCGA-OR-A5JC-01A	tumor	0.419272
ACC	TCGA-OR-A5JD-01A	tumor	0.282523
ACC	TCGA-OR-A5JE-01A	tumor	0.208984
ACC	TCGA-OR-A5JF-01A	tumor	0.101982
ACC	TCGA-OR-A5JG-01A	tumor	-0.30944
ACC	TCGA-OR-A5JI-01A	tumor	0.515087
ACC	TCGA-OR-A5JJ-01A	tumor	-0.257812
ACC	TCGA-OR-A5JK-01A	tumor	0.19335
ACC	TCGA-OR-A5JL-01A	tumor	0.0265762
ACC	TCGA-OR-A5JM-01A	tumor	-0.0134207
ACC	TCGA-OR-A5JO-01A	tumor	0.301532
ACC	TCGA-OR-A5JP-01A	tumor	-0.0250573
ACC	TCGA-OR-A5JQ-01A	tumor	0.41723
ACC	TCGA-OR-A5JR-01A	tumor	0.524868
ACC	TCGA-OR-A5JS-01A	tumor	-0.125335
ACC	TCGA-OR-A5JT-01A	tumor	0.31234
ACC	TCGA-OR-A5JV-01A	tumor	0.228696
ACC	TCGA-OR-A5JW-01A	tumor	0.293128
ACC	TCGA-OR-A5JX-01A	tumor	0.170173
ACC	TCGA-OR-A5JY-01A	tumor	-0.0617555
ACC	TCGA-OR-A5JZ-01A	tumor	0.334497
ACC	TCGA-OR-A5K0-01A	tumor	0.0616668
ACC	TCGA-OR-A5K1-01A	tumor	0.0527833
ACC	TCGA-OR-A5K2-01A	tumor	0.0346377
ACC	TCGA-OR-A5K3-01A	tumor	-0.00994029
ACC	TCGA-OR-A5K4-01A	tumor	-0.0513312
ACC	TCGA-OR-A5K5-01A	tumor	-0.181131
ACC	TCGA-OR-A5K6-01A	tumor	-0.0630738
ACC	TCGA-OR-A5K8-01A	tumor	0.142416
ACC	TCGA-OR-A5K9-01A	tumor	-0.0686966
ACC	TCGA-OR-A5KO-01A	tumor	0.0469995
ACC	TCGA-OR-A5KT-01A	tumor	0.18092
ACC	TCGA-OR-A5KU-01A	tumor	0.242991
ACC	TCGA-OR-A5KV-01A	tumor	-0.424502
ACC	TCGA-OR-A5KW-01A	tumor	-0.0232539
ACC	TCGA-OR-A5KX-01A	tumor	-0.055604
ACC	TCGA-OR-A5KY-01A	tumor	-0.25158
ACC	TCGA-OR-A5KZ-01A	tumor	-0.0653243
ACC	TCGA-OR-A5L3-01A	tumor	-0.0746453
ACC	TCGA-OR-A5L4-01A	tumor	0.0701912
ACC	TCGA-OR-A5L5-01A	tumor	0.258883
ACC	TCGA-OR-A5L6-01A	tumor	0.319935
ACC	TCGA-OR-A5L8-01A	tumor	0.0692935
ACC	TCGA-OR-A5L9-01A	tumor	-0.0190715
ACC	TCGA-OR-A5LA-01A	tumor	0.066434
ACC	TCGA-OR-A5LB-01A	tumor	-0.131128
ACC	TCGA-OR-A5LC-01A	tumor	-0.0546782
ACC	TCGA-OR-A5LD-01A	tumor	-0.382142
ACC	TCGA-OR-A5LE-01A	tumor	-0.389589
ACC	TCGA-OR-A5LG-01A	tumor	0.0685526
ACC	TCGA-OR-A5LH-01A	tumor	0.164584
ACC	TCGA-OR-A5LJ-01A	tumor	-0.244334
ACC	TCGA-OR-A5LK-01A	tumor	0.17788
ACC	TCGA-OR-A5LL-01A	tumor	0.0526395
ACC	TCGA-OR-A5LM-01A	tumor	-0.0720547
ACC	TCGA-OR-A5LN-01A	tumor	0.367306
ACC	TCGA-OR-A5LO-01A	tumor	-0.0954128
ACC	TCGA-OR-A5LP-01A	tumor	0.299318
ACC	TCGA-OR-A5LR-01A	tumor	0.329076
ACC	TCGA-OR-A5LS-01A	tumor	0.0961009
ACC	TCGA-OR-A5LT-01A	tumor	0.235374
ACC	TCGA-OU-A5PI-01A	tumor	0.24527
ACC	TCGA-P6-A5OF-01A	tumor	-0.083306
ACC	TCGA-P6-A5OG-01A	tumor	0.506759
ACC	TCGA-PA-A5YG-01A	tumor	0.399055
ACC	TCGA-PK-A5H8-01A	tumor	-0.0879061
ACC	TCGA-PK-A5H9-01A	tumor	0.199267
ACC	TCGA-PK-A5HA-01A	tumor	0.145958
ACC	TCGA-PK-A5HB-01A	tumor	-0.202311
ACC	TCGA-OR-A5J1-01A	tumor	-0.0835509
ACC	TCGA-OR-A5J2-01A	tumor	-0.422405
ACC	TCGA-OR-A5J3-01A	tumor	-0.0606644
ACC	TCGA-OR-A5J5-01A	tumor	-0.164188
ACC	TCGA-OR-A5J6-01A	tumor	-0.0595468
ACC	TCGA-OR-A5J7-01A	tumor	0.273958
ACC	TCGA-OR-A5J8-01A	tumor	0.399427
ACC	TCGA-OR-A5J9-01A	tumor	-0.102188
ACC	TCGA-OR-A5JA-01A	tumor	-0.165989
ACC	TCGA-OR-A5JB-01A	tumor	0.575498
ACC	TCGA-OR-A5JC-01A	tumor	0.419272
ACC	TCGA-OR-A5JD-01A	tumor	0.282523
ACC	TCGA-OR-A5JE-01A	tumor	0.208984
ACC	TCGA-OR-A5JF-01A	tumor	0.101982
ACC	TCGA-OR-A5JG-01A	tumor	-0.30944
ACC	TCGA-OR-A5JI-01A	tumor	0.515087
ACC	TCGA-OR-A5JJ-01A	tumor	-0.257812
ACC	TCGA-OR-A5JK-01A	tumor	0.19335
ACC	TCGA-OR-A5JL-01A	tumor	0.0265762
ACC	TCGA-OR-A5JM-01A	tumor	-0.0134207
ACC	TCGA-OR-A5JO-01A	tumor	0.301532
ACC	TCGA-OR-A5JP-01A	tumor	-0.0250573
ACC	TCGA-OR-A5JQ-01A	tumor	0.41723
ACC	TCGA-OR-A5JR-01A	tumor	0.524868
ACC	TCGA-OR-A5JS-01A	tumor	-0.125335
ACC	TCGA-OR-A5JT-01A	tumor	0.31234
ACC	TCGA-OR-A5JV-01A	tumor	0.228696
ACC	TCGA-OR-A5JW-01A	tumor	0.293128
ACC	TCGA-OR-A5JX-01A	tumor	0.170173
ACC	TCGA-OR-A5JY-01A	tumor	-0.0617555
ACC	TCGA-OR-A5JZ-01A	tumor	0.334497
ACC	TCGA-OR-A5K0-01A	tumor	0.0616668
ACC	TCGA-OR-A5K1-01A	tumor	0.0527833
ACC	TCGA-OR-A5K2-01A	tumor	0.0346377
ACC	TCGA-OR-A5K3-01A	tumor	-0.00994029
ACC	TCGA-OR-A5K4-01A	tumor	-0.0513312
ACC	TCGA-OR-A5K5-01A	tumor	-0.181131
ACC	TCGA-OR-A5K6-01A	tumor	-0.0630738
ACC	TCGA-OR-A5K8-01A	tumor	0.142416
ACC	TCGA-OR-A5K9-01A	tumor	-0.0686966
ACC	TCGA-OR-A5KO-01A	tumor	0.0469995
ACC	TCGA-OR-A5KT-01A	tumor	0.18092
ACC	TCGA-OR-A5KU-01A	tumor	0.242991
ACC	TCGA-OR-A5KV-01A	tumor	-0.424502
ACC	TCGA-OR-A5KW-01A	tumor	-0.0232539
ACC	TCGA-OR-A5KX-01A	tumor	-0.055604
ACC	TCGA-OR-A5KY-01A	tumor	-0.25158
ACC	TCGA-OR-A5KZ-01A	tumor	-0.0653243
ACC	TCGA-OR-A5L3-01A	tumor	-0.0746453
ACC	TCGA-OR-A5L4-01A	tumor	0.0701912
ACC	TCGA-OR-A5L5-01A	tumor	0.258883
ACC	TCGA-OR-A5L6-01A	tumor	0.319935
ACC	TCGA-OR-A5L8-01A	tumor	0.0692935
ACC	TCGA-OR-A5L9-01A	tumor	-0.0190715
ACC	TCGA-OR-A5LA-01A	tumor	0.066434
ACC	TCGA-OR-A5LB-01A	tumor	-0.131128
ACC	TCGA-OR-A5LC-01A	tumor	-0.0546782
ACC	TCGA-OR-A5LD-01A	tumor	-0.382142
ACC	TCGA-OR-A5LE-01A	tumor	-0.389589
ACC	TCGA-OR-A5LG-01A	tumor	0.0685526
ACC	TCGA-OR-A5LH-01A	tumor	0.164584
ACC	TCGA-OR-A5LJ-01A	tumor	-0.244334
ACC	TCGA-OR-A5LK-01A	tumor	0.17788
ACC	TCGA-OR-A5LL-01A	tumor	0.0526395
ACC	TCGA-OR-A5LM-01A	tumor	-0.0720547
ACC	TCGA-OR-A5LN-01A	tumor	0.367306
ACC	TCGA-OR-A5LO-01A	tumor	-0.0954128
ACC	TCGA-OR-A5LP-01A	tumor	0.299318
ACC	TCGA-OR-A5LR-01A	tumor	0.329076
ACC	TCGA-OR-A5LS-01A	tumor	0.0961009
ACC	TCGA-OR-A5LT-01A	tumor	0.235374
ACC	TCGA-OU-A5PI-01A	tumor	0.24527
ACC	TCGA-P6-A5OF-01A	tumor	-0.083306
ACC	TCGA-P6-A5OG-01A	tumor	0.506759
ACC	TCGA-PA-A5YG-01A	tumor	0.399055
ACC	TCGA-PK-A5H8-01A	tumor	-0.0879061
ACC	TCGA-PK-A5H9-01A	tumor	0.199267
ACC	TCGA-PK-A5HA-01A	tumor	0.145958
ACC	TCGA-PK-A5HB-01A	tumor	-0.202311
BLCA	TCGA-2F-A9KO-01A	tumor	0.355324
BLCA	TCGA-2F-A9KP-01A	tumor	-0.081499
BLCA	TCGA-2F-A9KQ-01A	tumor	0.0300954
BLCA	TCGA-2F-A9KR-01A	tumor	0.0884611
BLCA	TCGA-2F-A9KT-01A	tumor	0.146837
BLCA	TCGA-2F-A9KW-01A	tumor	0.0509179
BLCA	TCGA-4Z-AA7M-01A	tumor	0.0352425
BLCA	TCGA-4Z-AA7N-01A	tumor	0.118864
BLCA	TCGA-4Z-AA7O-01A	tumor	0.271821
BLCA	TCGA-4Z-AA7Q-01A	tumor	0.16112
BLCA	TCGA-4Z-AA7R-01A	tumor	-0.0276065
BLCA	TCGA-4Z-AA7S-01A	tumor	0.0495687
BLCA	TCGA-4Z-AA7W-01A	tumor	0.5342
BLCA	TCGA-4Z-AA7Y-01A	tumor	0.0755403
BLCA	TCGA-4Z-AA80-01A	tumor	-0.183454
BLCA	TCGA-4Z-AA81-01A	tumor	0.532792
BLCA	TCGA-4Z-AA82-01A	tumor	0.335278
BLCA	TCGA-4Z-AA83-01A	tumor	0.192374
BLCA	TCGA-4Z-AA84-01A	tumor	0.0450941
BLCA	TCGA-4Z-AA86-01A	tumor	0.409529
BLCA	TCGA-4Z-AA87-01A	tumor	-0.0985253
BLCA	TCGA-4Z-AA89-01A	tumor	0.140343
BLCA	TCGA-5N-A9KI-01A	tumor	0.250712
BLCA	TCGA-5N-A9KM-01A	tumor	0.122524
BLCA	TCGA-BL-A0C8-01A	tumor	0.0368542
BLCA	TCGA-BL-A13I-01A	tumor	0.27946
BLCA	TCGA-BL-A13J-01A	tumor	0.00160875
BLCA	TCGA-BL-A13J-11A	normal	0.00597154
BLCA	TCGA-BL-A3JM-01A	tumor	-0.164396
BLCA	TCGA-BL-A5ZZ-01A	tumor	0.0136545
BLCA	TCGA-BT-A0S7-01A	tumor	-0.0354021
BLCA	TCGA-BT-A0YX-01A	tumor	0.258876
BLCA	TCGA-BT-A20J-01A	tumor	0.203249
BLCA	TCGA-BT-A20N-01A	tumor	-0.041548
BLCA	TCGA-BT-A20N-11A	normal	0.044751
BLCA	TCGA-BT-A20O-01A	tumor	0.382537
BLCA	TCGA-BT-A20P-01A	tumor	0.0918736
BLCA	TCGA-BT-A20Q-01A	tumor	0.163915
BLCA	TCGA-BT-A20Q-11A	normal	-0.0146236
BLCA	TCGA-BT-A20R-01A	tumor	0.00196723
BLCA	TCGA-BT-A20R-11A	normal	-0.0135589
BLCA	TCGA-BT-A20T-01A	tumor	0.190413
BLCA	TCGA-BT-A20U-01A	tumor	0.0680996
BLCA	TCGA-BT-A20U-11A	normal	0.250565
BLCA	TCGA-BT-A20V-01A	tumor	0.198659
BLCA	TCGA-BT-A20W-01A	tumor	-0.00818427
BLCA	TCGA-BT-A20W-11A	normal	0.135129
BLCA	TCGA-BT-A20X-01A	tumor	0.328606
BLCA	TCGA-BT-A2LA-01A	tumor	-0.303389
BLCA	TCGA-BT-A2LA-11A	normal	0.149804
BLCA	TCGA-BT-A2LB-01A	tumor	0.167838
BLCA	TCGA-BT-A2LB-11A	normal	0.255644
BLCA	TCGA-BT-A2LD-01A	tumor	-0.0335292
BLCA	TCGA-BT-A3PH-01A	tumor	0.0506445
BLCA	TCGA-BT-A3PJ-01A	tumor	0.506462
BLCA	TCGA-BT-A3PK-01A	tumor	0.238774
BLCA	TCGA-BT-A42C-01A	tumor	0.156197
BLCA	TCGA-BT-A42E-01A	tumor	0.505142
BLCA	TCGA-BT-A42F-01A	tumor	0.310262
BLCA	TCGA-C4-A0EZ-01A	tumor	-0.35063
BLCA	TCGA-C4-A0F0-01A	tumor	0.215184
BLCA	TCGA-C4-A0F1-01A	tumor	0.313757
BLCA	TCGA-C4-A0F6-01A	tumor	-0.0230697
BLCA	TCGA-C4-A0F7-01A	tumor	-0.131482
BLCA	TCGA-CF-A1HR-01A	tumor	0.00306619
BLCA	TCGA-CF-A1HS-01A	tumor	0.240422
BLCA	TCGA-CF-A27C-01A	tumor	0.150634
BLCA	TCGA-CF-A3MF-01A	tumor	-0.0356109
BLCA	TCGA-CF-A3MG-01A	tumor	0.0852201
BLCA	TCGA-CF-A3MH-01A	tumor	0.102996
BLCA	TCGA-CF-A3MI-01A	tumor	0.15474
BLCA	TCGA-CF-A47S-01A	tumor	0.241594
BLCA	TCGA-CF-A47T-01A	tumor	-0.0382527
BLCA	TCGA-CF-A47V-01A	tumor	0.279453
BLCA	TCGA-CF-A47W-01A	tumor	0.174373
BLCA	TCGA-CF-A47X-01A	tumor	0.11179
BLCA	TCGA-CF-A47Y-01A	tumor	0.163134
BLCA	TCGA-CF-A5U8-01A	tumor	0.209941
BLCA	TCGA-CF-A5UA-01A	tumor	0.0333825
BLCA	TCGA-CF-A7I0-01A	tumor	-0.141874
BLCA	TCGA-CF-A8HX-01A	tumor	0.0348068
BLCA	TCGA-CF-A8HY-01A	tumor	0.112494
BLCA	TCGA-CF-A9FF-01A	tumor	0.0209901
BLCA	TCGA-CF-A9FH-01A	tumor	0.220283
BLCA	TCGA-CF-A9FL-01A	tumor	0.1482
BLCA	TCGA-CF-A9FM-01A	tumor	0.240159
BLCA	TCGA-CU-A0YN-01A	tumor	0.130456
BLCA	TCGA-CU-A0YN-11A	normal	-0.000589224
BLCA	TCGA-CU-A0YO-01A	tumor	0.217888
BLCA	TCGA-CU-A0YR-01A	tumor	0.0349635
BLCA	TCGA-CU-A0YR-11A	normal	0.0281501
BLCA	TCGA-CU-A3KJ-01A	tumor	0.377041
BLCA	TCGA-CU-A3QU-01A	tumor	0.0640942
BLCA	TCGA-CU-A3YL-01A	tumor	0.0628564
BLCA	TCGA-CU-A5W6-01A	tumor	0.00474335
BLCA	TCGA-CU-A72E-01A	tumor	0.166827
BLCA	TCGA-DK-A1A3-01A	tumor	0.0108957
BLCA	TCGA-DK-A1A5-01A	tumor	0.236947
BLCA	TCGA-DK-A1A6-01A	tumor	-0.0630237
BLCA	TCGA-DK-A1A7-01A	tumor	-0.0530395
BLCA	TCGA-DK-A1AA-01A	tumor	0.22574
BLCA	TCGA-DK-A1AB-01A	tumor	0.433152
BLCA	TCGA-DK-A1AC-01A	tumor	0.046898
BLCA	TCGA-DK-A1AD-01A	tumor	-0.0894235
BLCA	TCGA-DK-A1AE-01A	tumor	0.0198447
BLCA	TCGA-DK-A1AF-01A	tumor	0.339908
BLCA	TCGA-DK-A1AG-01A	tumor	0.202811
BLCA	TCGA-DK-A2HX-01A	tumor	0.205357
BLCA	TCGA-DK-A2I1-01A	tumor	0.080125
BLCA	TCGA-DK-A2I2-01A	tumor	0.354877
BLCA	TCGA-DK-A2I4-01A	tumor	0.374189
BLCA	TCGA-DK-A2I6-01A	tumor	0.168297
BLCA	TCGA-DK-A3IK-01A	tumor	-0.00467942
BLCA	TCGA-DK-A3IL-01A	tumor	-0.0823941
BLCA	TCGA-DK-A3IM-01A	tumor	0.0400607
BLCA	TCGA-DK-A3IN-01A	tumor	0.131123
BLCA	TCGA-DK-A3IQ-01A	tumor	0.0726689
BLCA	TCGA-DK-A3IS-01A	tumor	0.159443
BLCA	TCGA-DK-A3IT-01A	tumor	0.173905
BLCA	TCGA-DK-A3IU-01A	tumor	0.214922
BLCA	TCGA-DK-A3IV-01A	tumor	0.393349
BLCA	TCGA-DK-A3WW-01A	tumor	0.411544
BLCA	TCGA-DK-A3WX-01A	tumor	0.456059
BLCA	TCGA-DK-A3WY-01A	tumor	0.144082
BLCA	TCGA-DK-A3X1-01A	tumor	0.0237654
BLCA	TCGA-DK-A3X2-01A	tumor	-0.0505389
BLCA	TCGA-DK-A6AV-01A	tumor	-0.0966508
BLCA	TCGA-DK-A6AW-01A	tumor	0.168736
BLCA	TCGA-DK-A6B0-01A	tumor	0.243066
BLCA	TCGA-DK-A6B1-01A	tumor	-0.079826
BLCA	TCGA-DK-A6B2-01A	tumor	0.155823
BLCA	TCGA-DK-A6B5-01A	tumor	0.362672
BLCA	TCGA-DK-A6B6-01A	tumor	0.380453
BLCA	TCGA-DK-AA6L-01A	tumor	0.109428
BLCA	TCGA-DK-AA6M-01A	tumor	0.30666
BLCA	TCGA-DK-AA6P-01A	tumor	0.123941
BLCA	TCGA-DK-AA6Q-01A	tumor	0.222246
BLCA	TCGA-DK-AA6R-01A	tumor	0.173136
BLCA	TCGA-DK-AA6S-01A	tumor	0.321465
BLCA	TCGA-DK-AA6T-01A	tumor	0.029974
BLCA	TCGA-DK-AA6U-01A	tumor	0.0246493
BLCA	TCGA-DK-AA6W-01A	tumor	-0.302494
BLCA	TCGA-DK-AA6X-01A	tumor	0.24715
BLCA	TCGA-DK-AA71-01A	tumor	0.0412845
BLCA	TCGA-DK-AA74-01A	tumor	0.312123
BLCA	TCGA-DK-AA75-01A	tumor	-0.157669
BLCA	TCGA-DK-AA76-01A	tumor	0.0835669
BLCA	TCGA-DK-AA77-01A	tumor	0.198411
BLCA	TCGA-E5-A2PC-01A	tumor	0.307996
BLCA	TCGA-E5-A4TZ-01A	tumor	-0.0317302
BLCA	TCGA-E5-A4U1-01A	tumor	-0.0330126
BLCA	TCGA-E7-A3X6-01A	tumor	0.387983
BLCA	TCGA-E7-A3Y1-01A	tumor	0.138801
BLCA	TCGA-E7-A4IJ-01A	tumor	0.150819
BLCA	TCGA-E7-A4XJ-01A	tumor	0.114641
BLCA	TCGA-E7-A519-01A	tumor	0.26329
BLCA	TCGA-E7-A541-01A	tumor	0.145906
BLCA	TCGA-E7-A5KE-01A	tumor	-0.128205
BLCA	TCGA-E7-A5KF-01A	tumor	0.417339
BLCA	TCGA-E7-A677-01A	tumor	0.200524
BLCA	TCGA-E7-A678-01A	tumor	0.315401
BLCA	TCGA-E7-A6MD-01A	tumor	0.234097
BLCA	TCGA-E7-A6ME-01A	tumor	0.178484
BLCA	TCGA-E7-A6MF-01A	tumor	0.242644
BLCA	TCGA-E7-A7DU-01A	tumor	0.105715
BLCA	TCGA-E7-A7DV-01A	tumor	0.264658
BLCA	TCGA-E7-A7PW-01A	tumor	-0.103841
BLCA	TCGA-E7-A7XN-01A	tumor	0.64937
BLCA	TCGA-E7-A85H-01A	tumor	0.0752404
BLCA	TCGA-E7-A8O7-01A	tumor	0.286791
BLCA	TCGA-E7-A8O8-01A	tumor	0.0972791
BLCA	TCGA-E7-A97P-01A	tumor	0.422141
BLCA	TCGA-E7-A97Q-01A	tumor	0.0424688
BLCA	TCGA-FD-A3B3-01A	tumor	0.282564
BLCA	TCGA-FD-A3B4-01A	tumor	0.224265
BLCA	TCGA-FD-A3B5-01A	tumor	0.205921
BLCA	TCGA-FD-A3B6-01A	tumor	0.353647
BLCA	TCGA-FD-A3B7-01A	tumor	0.285442
BLCA	TCGA-FD-A3B8-01A	tumor	0.333118
BLCA	TCGA-FD-A3N5-01A	tumor	0.150652
BLCA	TCGA-FD-A3N6-01A	tumor	0.209485
BLCA	TCGA-FD-A3NA-01A	tumor	0.109108
BLCA	TCGA-FD-A3SJ-01A	tumor	-0.123143
BLCA	TCGA-FD-A3SL-01A	tumor	-0.0730212
BLCA	TCGA-FD-A3SM-01A	tumor	0.167918
BLCA	TCGA-FD-A3SN-01A	tumor	0.141624
BLCA	TCGA-FD-A3SO-01A	tumor	0.330358
BLCA	TCGA-FD-A3SP-01A	tumor	0.209632
BLCA	TCGA-FD-A3SQ-01A	tumor	0.195831
BLCA	TCGA-FD-A3SR-01A	tumor	0.25303
BLCA	TCGA-FD-A3SS-01A	tumor	0.0669891
BLCA	TCGA-FD-A43N-01A	tumor	0.00112136
BLCA	TCGA-FD-A43P-01A	tumor	0.195386
BLCA	TCGA-FD-A43S-01A	tumor	0.211437
BLCA	TCGA-FD-A43U-01A	tumor	0.0938623
BLCA	TCGA-FD-A43X-01A	tumor	0.108465
BLCA	TCGA-FD-A43Y-01A	tumor	0.333937
BLCA	TCGA-FD-A5BR-01A	tumor	0.0437147
BLCA	TCGA-FD-A5BS-01A	tumor	0.333929
BLCA	TCGA-FD-A5BT-01A	tumor	0.182868
BLCA	TCGA-FD-A5BU-01A	tumor	0.285911
BLCA	TCGA-FD-A5BV-01A	tumor	-0.0659395
BLCA	TCGA-FD-A5BX-01A	tumor	0.234527
BLCA	TCGA-FD-A5BY-01A	tumor	0.17228
BLCA	TCGA-FD-A5BZ-01A	tumor	-0.068966
BLCA	TCGA-FD-A5C0-01A	tumor	0.196679
BLCA	TCGA-FD-A5C1-01A	tumor	0.304287
BLCA	TCGA-FD-A62N-01A	tumor	0.341514
BLCA	TCGA-FD-A62O-01A	tumor	0.00505279
BLCA	TCGA-FD-A62P-01A	tumor	0.0453012
BLCA	TCGA-FD-A62S-01A	tumor	0.264725
BLCA	TCGA-FD-A6TA-01A	tumor	0.111203
BLCA	TCGA-FD-A6TB-01A	tumor	0.14736
BLCA	TCGA-FD-A6TC-01A	tumor	0.0223216
BLCA	TCGA-FD-A6TD-01A	tumor	0.295145
BLCA	TCGA-FD-A6TE-01A	tumor	0.041573
BLCA	TCGA-FD-A6TF-01A	tumor	-0.0355906
BLCA	TCGA-FD-A6TG-01A	tumor	-0.00769426
BLCA	TCGA-FD-A6TH-01A	tumor	0.0903822
BLCA	TCGA-FD-A6TI-01A	tumor	0.116038
BLCA	TCGA-FD-A6TK-01A	tumor	0.375073
BLCA	TCGA-FJ-A3Z7-01A	tumor	-0.0461794
BLCA	TCGA-FJ-A3Z9-01A	tumor	0.0696551
BLCA	TCGA-FJ-A3ZE-01A	tumor	-0.0444979
BLCA	TCGA-FJ-A3ZF-01A	tumor	-0.116106
BLCA	TCGA-FJ-A871-01A	tumor	0.120593
BLCA	TCGA-FT-A3EE-01A	tumor	0.216804
BLCA	TCGA-FT-A61P-01A	tumor	0.336374
BLCA	TCGA-G2-A2EC-01A	tumor	0.128618
BLCA	TCGA-G2-A2EF-01A	tumor	0.369262
BLCA	TCGA-G2-A2EJ-01A	tumor	0.516646
BLCA	TCGA-G2-A2EK-01A	tumor	0.141408
BLCA	TCGA-G2-A2EL-01A	tumor	-0.310334
BLCA	TCGA-G2-A2EO-01A	tumor	-0.146478
BLCA	TCGA-G2-A2ES-01A	tumor	0.383762
BLCA	TCGA-G2-A3IB-01A	tumor	0.255173
BLCA	TCGA-G2-A3IE-01A	tumor	0.0897501
BLCA	TCGA-G2-A3VY-01A	tumor	-0.0627687
BLCA	TCGA-G2-AA3B-01A	tumor	0.0970181
BLCA	TCGA-G2-AA3C-01A	tumor	0.344014
BLCA	TCGA-G2-AA3D-01A	tumor	0.130406
BLCA	TCGA-G2-AA3F-01A	tumor	-0.0172602
BLCA	TCGA-GC-A3BM-01A	tumor	0.0673822
BLCA	TCGA-GC-A3BM-11A	normal	0.213296
BLCA	TCGA-GC-A3I6-01A	tumor	0.288183
BLCA	TCGA-GC-A3OO-01A	tumor	0.0196501
BLCA	TCGA-GC-A3RB-01A	tumor	0.100152
BLCA	TCGA-GC-A3RC-01A	tumor	0.255644
BLCA	TCGA-GC-A3RD-01A	tumor	0.173729
BLCA	TCGA-GC-A3WC-01A	tumor	0.113665
BLCA	TCGA-GC-A3WC-11A	normal	0.0449614
BLCA	TCGA-GC-A3YS-01A	tumor	0.0693706
BLCA	TCGA-GC-A4ZW-01A	tumor	0.0204023
BLCA	TCGA-GC-A6I1-01A	tumor	0.565041
BLCA	TCGA-GC-A6I3-01A	tumor	0.0375683
BLCA	TCGA-GC-A6I3-11A	normal	0.277965
BLCA	TCGA-GD-A2C5-01A	tumor	0.100948
BLCA	TCGA-GD-A2C5-11A	normal	0.173363
BLCA	TCGA-GD-A3OP-01A	tumor	0.0793035
BLCA	TCGA-GD-A3OP-11A	normal	0.280574
BLCA	TCGA-GD-A3OQ-01A	tumor	0.369623
BLCA	TCGA-GD-A3OQ-11A	normal	0.100806
BLCA	TCGA-GD-A3OS-01A	tumor	0.239248
BLCA	TCGA-GD-A6C6-01A	tumor	0.283982
BLCA	TCGA-GD-A76B-01A	tumor	0.126623
BLCA	TCGA-GU-A42P-01A	tumor	-0.0538426
BLCA	TCGA-GU-A42Q-01A	tumor	-0.0152225
BLCA	TCGA-GU-A42R-01A	tumor	0.0974132
BLCA	TCGA-GU-A762-01A	tumor	0.520523
BLCA	TCGA-GU-A763-01A	tumor	0.221934
BLCA	TCGA-GU-A764-01A	tumor	0.20713
BLCA	TCGA-GU-A766-01A	tumor	0.536163
BLCA	TCGA-GU-A767-01A	tumor	-0.00291016
BLCA	TCGA-GU-AATO-01A	tumor	0.187781
BLCA	TCGA-GU-AATP-01A	tumor	0.137664
BLCA	TCGA-GU-AATQ-01A	tumor	0.160022
BLCA	TCGA-GV-A3JV-01A	tumor	-0.0700171
BLCA	TCGA-GV-A3JW-01A	tumor	-0.0581122
BLCA	TCGA-GV-A3JX-01A	tumor	0.192638
BLCA	TCGA-GV-A3JZ-01A	tumor	-0.0839442
BLCA	TCGA-GV-A3QF-01A	tumor	-0.141147
BLCA	TCGA-GV-A3QG-01A	tumor	0.10847
BLCA	TCGA-GV-A3QH-01A	tumor	0.00323706
BLCA	TCGA-GV-A3QI-01A	tumor	-0.0680675
BLCA	TCGA-GV-A3QK-01B	tumor	0.26642
BLCA	TCGA-GV-A40E-01A	tumor	0.4138
BLCA	TCGA-GV-A40G-01A	tumor	-0.0661126
BLCA	TCGA-GV-A6ZA-01A	tumor	0.124617
BLCA	TCGA-H4-A2HO-01A	tumor	-0.069427
BLCA	TCGA-H4-A2HQ-01A	tumor	0.150665
BLCA	TCGA-HQ-A2OE-01A	tumor	-0.101217
BLCA	TCGA-HQ-A2OF-01A	tumor	-0.00552463
BLCA	TCGA-HQ-A5ND-01A	tumor	0.307495
BLCA	TCGA-HQ-A5NE-01A	tumor	0.27669
BLCA	TCGA-K4-A3WS-01A	tumor	0.104905
BLCA	TCGA-K4-A3WU-01B	tumor	0.0299273
BLCA	TCGA-K4-A3WV-01A	tumor	0.0717749
BLCA	TCGA-K4-A3WV-11A	normal	0.11162
BLCA	TCGA-K4-A4AB-01B	tumor	0.214402
BLCA	TCGA-K4-A4AC-01A	tumor	0.215514
BLCA	TCGA-K4-A54R-01A	tumor	0.142485
BLCA	TCGA-K4-A54R-11A	normal	0.230562
BLCA	TCGA-K4-A5RH-01A	tumor	0.221676
BLCA	TCGA-K4-A5RI-01A	tumor	0.0784286
BLCA	TCGA-K4-A5RI-11A	normal	0.210429
BLCA	TCGA-K4-A5RJ-01A	tumor	0.250332
BLCA	TCGA-K4-A6FZ-01A	tumor	0.363777
BLCA	TCGA-K4-A6MB-01A	tumor	-0.091432
BLCA	TCGA-K4-A83P-01A	tumor	0.0326111
BLCA	TCGA-K4-AAQO-01A	tumor	-0.00302845
BLCA	TCGA-KQ-A41N-01A	tumor	-0.114431
BLCA	TCGA-KQ-A41O-01A	tumor	0.177162
BLCA	TCGA-KQ-A41P-01A	tumor	0.00154431
BLCA	TCGA-KQ-A41Q-01A	tumor	0.0416337
BLCA	TCGA-KQ-A41R-01A	tumor	-0.187193
BLCA	TCGA-KQ-A41S-01A	tumor	0.0413496
BLCA	TCGA-LC-A66R-01A	tumor	0.196365
BLCA	TCGA-LT-A5Z6-01A	tumor	-0.0085546
BLCA	TCGA-LT-A8JT-01A	tumor	0.238863
BLCA	TCGA-MV-A51V-01A	tumor	-0.0185987
BLCA	TCGA-PQ-A6FI-01A	tumor	0.315673
BLCA	TCGA-PQ-A6FN-01A	tumor	0.076169
BLCA	TCGA-R3-A69X-01A	tumor	0.215219
BLCA	TCGA-S5-A6DX-01A	tumor	0.0307084
BLCA	TCGA-S5-AA26-01A	tumor	0.00600982
BLCA	TCGA-SY-A9G0-01A	tumor	-0.0145394
BLCA	TCGA-SY-A9G5-01A	tumor	0.44264
BLCA	TCGA-UY-A78K-01A	tumor	0.180025
BLCA	TCGA-UY-A78L-01A	tumor	0.209237
BLCA	TCGA-UY-A78M-01A	tumor	0.131051
BLCA	TCGA-UY-A78N-01A	tumor	-0.250412
BLCA	TCGA-UY-A78O-01A	tumor	-0.0964513
BLCA	TCGA-UY-A78P-01A	tumor	0.336212
BLCA	TCGA-UY-A8OB-01A	tumor	0.157417
BLCA	TCGA-UY-A8OC-01A	tumor	0.116084
BLCA	TCGA-UY-A8OD-01A	tumor	-0.0914907
BLCA	TCGA-UY-A9PA-01A	tumor	0.399053
BLCA	TCGA-UY-A9PB-01A	tumor	0.355106
BLCA	TCGA-UY-A9PD-01A	tumor	-0.0488953
BLCA	TCGA-UY-A9PE-01A	tumor	-0.0992849
BLCA	TCGA-UY-A9PF-01A	tumor	0.0918023
BLCA	TCGA-UY-A9PH-01A	tumor	0.297397
BLCA	TCGA-XF-A8HB-01A	tumor	0.0620741
BLCA	TCGA-XF-A8HC-01A	tumor	-0.0621755
BLCA	TCGA-XF-A8HD-01A	tumor	0.392039
BLCA	TCGA-XF-A8HE-01A	tumor	0.362974
BLCA	TCGA-XF-A8HF-01A	tumor	0.0494133
BLCA	TCGA-XF-A8HG-01A	tumor	-0.138439
BLCA	TCGA-XF-A8HH-01A	tumor	-0.153697
BLCA	TCGA-XF-A8HI-01A	tumor	0.260503
BLCA	TCGA-XF-A9SH-01A	tumor	-0.115901
BLCA	TCGA-XF-A9SI-01A	tumor	0.360641
BLCA	TCGA-XF-A9SJ-01A	tumor	0.323317
BLCA	TCGA-XF-A9SK-01A	tumor	0.319501
BLCA	TCGA-XF-A9SL-01A	tumor	0.0903875
BLCA	TCGA-XF-A9SM-01A	tumor	0.341239
BLCA	TCGA-XF-A9SP-01A	tumor	0.0452722
BLCA	TCGA-XF-A9ST-01A	tumor	-0.230807
BLCA	TCGA-XF-A9SU-01A	tumor	0.0878624
BLCA	TCGA-XF-A9SV-01A	tumor	-0.00541062
BLCA	TCGA-XF-A9SW-01A	tumor	0.0561698
BLCA	TCGA-XF-A9SX-01A	tumor	0.221952
BLCA	TCGA-XF-A9SY-01A	tumor	0.447891
BLCA	TCGA-XF-A9SZ-01A	tumor	0.09351
BLCA	TCGA-XF-A9T0-01A	tumor	-0.167463
BLCA	TCGA-XF-A9T2-01A	tumor	-0.0955705
BLCA	TCGA-XF-A9T3-01A	tumor	0.261975
BLCA	TCGA-XF-A9T4-01A	tumor	0.504836
BLCA	TCGA-XF-A9T5-01A	tumor	0.45924
BLCA	TCGA-XF-A9T6-01A	tumor	0.294873
BLCA	TCGA-XF-A9T8-01A	tumor	0.25185
BLCA	TCGA-XF-AAME-01A	tumor	0.166049
BLCA	TCGA-XF-AAMG-01A	tumor	-0.345905
BLCA	TCGA-XF-AAMH-01A	tumor	-0.0180854
BLCA	TCGA-XF-AAMJ-01A	tumor	0.0458034
BLCA	TCGA-XF-AAML-01A	tumor	0.251771
BLCA	TCGA-XF-AAMQ-01A	tumor	0.143018
BLCA	TCGA-XF-AAMR-01A	tumor	0.081042
BLCA	TCGA-XF-AAMT-01A	tumor	0.20312
BLCA	TCGA-XF-AAMW-01A	tumor	0.2923
BLCA	TCGA-XF-AAMX-01A	tumor	-0.127926
BLCA	TCGA-XF-AAMY-01A	tumor	-0.073018
BLCA	TCGA-XF-AAMZ-01A	tumor	-0.00565383
BLCA	TCGA-XF-AAN0-01A	tumor	0.171099
BLCA	TCGA-XF-AAN1-01A	tumor	0.150742
BLCA	TCGA-XF-AAN2-01A	tumor	0.455881
BLCA	TCGA-XF-AAN3-01A	tumor	0.0806425
BLCA	TCGA-XF-AAN4-01A	tumor	0.301026
BLCA	TCGA-XF-AAN5-01A	tumor	0.341537
BLCA	TCGA-XF-AAN7-01A	tumor	-0.0876007
BLCA	TCGA-XF-AAN8-01A	tumor	0.279287
BLCA	TCGA-YC-A89H-01A	tumor	0.0404649
BLCA	TCGA-YC-A8S6-01A	tumor	0.170148
BLCA	TCGA-YC-A9TC-01A	tumor	-0.0369749
BLCA	TCGA-YF-AA3L-01A	tumor	0.0865602
BLCA	TCGA-YF-AA3M-01A	tumor	0.044738
BLCA	TCGA-ZF-A9R0-01A	tumor	-0.00613896
BLCA	TCGA-ZF-A9R1-01A	tumor	0.173329
BLCA	TCGA-ZF-A9R2-01A	tumor	0.00297742
BLCA	TCGA-ZF-A9R3-01A	tumor	0.193121
BLCA	TCGA-ZF-A9R4-01A	tumor	0.0922184
BLCA	TCGA-ZF-A9R5-01A	tumor	0.27401
BLCA	TCGA-ZF-A9R7-01A	tumor	0.506936
BLCA	TCGA-ZF-A9R9-01A	tumor	-0.0934996
BLCA	TCGA-ZF-A9RC-01A	tumor	-0.111089
BLCA	TCGA-ZF-A9RD-01A	tumor	0.39659
BLCA	TCGA-ZF-A9RE-01A	tumor	0.055187
BLCA	TCGA-ZF-A9RF-01A	tumor	0.25021
BLCA	TCGA-ZF-A9RL-01A	tumor	-0.0330496
BLCA	TCGA-ZF-A9RM-01A	tumor	0.0484121
BLCA	TCGA-ZF-A9RN-01A	tumor	0.251711
BLCA	TCGA-ZF-AA4N-01A	tumor	0.00635342
BLCA	TCGA-ZF-AA4R-01A	tumor	0.0237925
BLCA	TCGA-ZF-AA4T-01A	tumor	0.172606
BLCA	TCGA-ZF-AA4U-01A	tumor	0.163637
BLCA	TCGA-ZF-AA4V-01A	tumor	0.368011
BLCA	TCGA-ZF-AA4W-01A	tumor	0.1309
BLCA	TCGA-ZF-AA4X-01A	tumor	0.0564897
BLCA	TCGA-ZF-AA51-01A	tumor	0.0751755
BLCA	TCGA-ZF-AA52-01A	tumor	0.0448163
BLCA	TCGA-ZF-AA53-01A	tumor	0.319444
BLCA	TCGA-ZF-AA54-01A	tumor	0.120093
BLCA	TCGA-ZF-AA56-01A	tumor	0.245782
BLCA	TCGA-ZF-AA58-01A	tumor	0.623423
BLCA	TCGA-ZF-AA5H-01A	tumor	0.332603
BLCA	TCGA-ZF-AA5N-01A	tumor	0.201594
BLCA	TCGA-ZF-AA5P-01A	tumor	0.289013
BLCA	TCGA-2F-A9KO-01A	tumor	0.355324
BLCA	TCGA-2F-A9KP-01A	tumor	-0.081499
BLCA	TCGA-2F-A9KQ-01A	tumor	0.0300954
BLCA	TCGA-2F-A9KR-01A	tumor	0.0884611
BLCA	TCGA-2F-A9KT-01A	tumor	0.146837
BLCA	TCGA-2F-A9KW-01A	tumor	0.0509179
BLCA	TCGA-4Z-AA7M-01A	tumor	0.0352425
BLCA	TCGA-4Z-AA7N-01A	tumor	0.118864
BLCA	TCGA-4Z-AA7O-01A	tumor	0.271821
BLCA	TCGA-4Z-AA7Q-01A	tumor	0.16112
BLCA	TCGA-4Z-AA7R-01A	tumor	-0.0276065
BLCA	TCGA-4Z-AA7S-01A	tumor	0.0495687
BLCA	TCGA-4Z-AA7W-01A	tumor	0.5342
BLCA	TCGA-4Z-AA7Y-01A	tumor	0.0755403
BLCA	TCGA-4Z-AA80-01A	tumor	-0.183454
BLCA	TCGA-4Z-AA81-01A	tumor	0.532792
BLCA	TCGA-4Z-AA82-01A	tumor	0.335278
BLCA	TCGA-4Z-AA83-01A	tumor	0.192374
BLCA	TCGA-4Z-AA84-01A	tumor	0.0450941
BLCA	TCGA-4Z-AA86-01A	tumor	0.409529
BLCA	TCGA-4Z-AA87-01A	tumor	-0.0985253
BLCA	TCGA-4Z-AA89-01A	tumor	0.140343
BLCA	TCGA-5N-A9KI-01A	tumor	0.250712
BLCA	TCGA-5N-A9KM-01A	tumor	0.122524
BLCA	TCGA-BL-A0C8-01A	tumor	0.0368542
BLCA	TCGA-BL-A13I-01A	tumor	0.27946
BLCA	TCGA-BL-A13J-01A	tumor	0.00160875
BLCA	TCGA-BL-A13J-11A	normal	0.00597154
BLCA	TCGA-BL-A3JM-01A	tumor	-0.164396
BLCA	TCGA-BL-A5ZZ-01A	tumor	0.0136545
BLCA	TCGA-BT-A0S7-01A	tumor	-0.0354021
BLCA	TCGA-BT-A0YX-01A	tumor	0.258876
BLCA	TCGA-BT-A20J-01A	tumor	0.203249
BLCA	TCGA-BT-A20N-01A	tumor	-0.041548
BLCA	TCGA-BT-A20N-11A	normal	0.044751
BLCA	TCGA-BT-A20O-01A	tumor	0.382537
BLCA	TCGA-BT-A20P-01A	tumor	0.0918736
BLCA	TCGA-BT-A20Q-01A	tumor	0.163915
BLCA	TCGA-BT-A20Q-11A	normal	-0.0146236
BLCA	TCGA-BT-A20R-01A	tumor	0.00196723
BLCA	TCGA-BT-A20R-11A	normal	-0.0135589
BLCA	TCGA-BT-A20T-01A	tumor	0.190413
BLCA	TCGA-BT-A20U-01A	tumor	0.0680996
BLCA	TCGA-BT-A20U-11A	normal	0.250565
BLCA	TCGA-BT-A20V-01A	tumor	0.198659
BLCA	TCGA-BT-A20W-01A	tumor	-0.00818427
BLCA	TCGA-BT-A20W-11A	normal	0.135129
BLCA	TCGA-BT-A20X-01A	tumor	0.328606
BLCA	TCGA-BT-A2LA-01A	tumor	-0.303389
BLCA	TCGA-BT-A2LA-11A	normal	0.149804
BLCA	TCGA-BT-A2LB-01A	tumor	0.167838
BLCA	TCGA-BT-A2LB-11A	normal	0.255644
BLCA	TCGA-BT-A2LD-01A	tumor	-0.0335292
BLCA	TCGA-BT-A3PH-01A	tumor	0.0506445
BLCA	TCGA-BT-A3PJ-01A	tumor	0.506462
BLCA	TCGA-BT-A3PK-01A	tumor	0.238774
BLCA	TCGA-BT-A42C-01A	tumor	0.156197
BLCA	TCGA-BT-A42E-01A	tumor	0.505142
BLCA	TCGA-BT-A42F-01A	tumor	0.310262
BLCA	TCGA-C4-A0EZ-01A	tumor	-0.35063
BLCA	TCGA-C4-A0F0-01A	tumor	0.215184
BLCA	TCGA-C4-A0F1-01A	tumor	0.313757
BLCA	TCGA-C4-A0F6-01A	tumor	-0.0230697
BLCA	TCGA-C4-A0F7-01A	tumor	-0.131482
BLCA	TCGA-CF-A1HR-01A	tumor	0.00306619
BLCA	TCGA-CF-A1HS-01A	tumor	0.240422
BLCA	TCGA-CF-A27C-01A	tumor	0.150634
BLCA	TCGA-CF-A3MF-01A	tumor	-0.0356109
BLCA	TCGA-CF-A3MG-01A	tumor	0.0852201
BLCA	TCGA-CF-A3MH-01A	tumor	0.102996
BLCA	TCGA-CF-A3MI-01A	tumor	0.15474
BLCA	TCGA-CF-A47S-01A	tumor	0.241594
BLCA	TCGA-CF-A47T-01A	tumor	-0.0382527
BLCA	TCGA-CF-A47V-01A	tumor	0.279453
BLCA	TCGA-CF-A47W-01A	tumor	0.174373
BLCA	TCGA-CF-A47X-01A	tumor	0.11179
BLCA	TCGA-CF-A47Y-01A	tumor	0.163134
BLCA	TCGA-CF-A5U8-01A	tumor	0.209941
BLCA	TCGA-CF-A5UA-01A	tumor	0.0333825
BLCA	TCGA-CF-A7I0-01A	tumor	-0.141874
BLCA	TCGA-CF-A8HX-01A	tumor	0.0348068
BLCA	TCGA-CF-A8HY-01A	tumor	0.112494
BLCA	TCGA-CF-A9FF-01A	tumor	0.0209901
BLCA	TCGA-CF-A9FH-01A	tumor	0.220283
BLCA	TCGA-CF-A9FL-01A	tumor	0.1482
BLCA	TCGA-CF-A9FM-01A	tumor	0.240159
BLCA	TCGA-CU-A0YN-01A	tumor	0.130456
BLCA	TCGA-CU-A0YN-11A	normal	-0.000589224
BLCA	TCGA-CU-A0YO-01A	tumor	0.217888
BLCA	TCGA-CU-A0YR-01A	tumor	0.0349635
BLCA	TCGA-CU-A0YR-11A	normal	0.0281501
BLCA	TCGA-CU-A3KJ-01A	tumor	0.377041
BLCA	TCGA-CU-A3QU-01A	tumor	0.0640942
BLCA	TCGA-CU-A3YL-01A	tumor	0.0628564
BLCA	TCGA-CU-A5W6-01A	tumor	0.00474335
BLCA	TCGA-CU-A72E-01A	tumor	0.166827
BLCA	TCGA-DK-A1A3-01A	tumor	0.0108957
BLCA	TCGA-DK-A1A5-01A	tumor	0.236947
BLCA	TCGA-DK-A1A6-01A	tumor	-0.0630237
BLCA	TCGA-DK-A1A7-01A	tumor	-0.0530395
BLCA	TCGA-DK-A1AA-01A	tumor	0.22574
BLCA	TCGA-DK-A1AB-01A	tumor	0.433152
BLCA	TCGA-DK-A1AC-01A	tumor	0.046898
BLCA	TCGA-DK-A1AD-01A	tumor	-0.0894235
BLCA	TCGA-DK-A1AE-01A	tumor	0.0198447
BLCA	TCGA-DK-A1AF-01A	tumor	0.339908
BLCA	TCGA-DK-A1AG-01A	tumor	0.202811
BLCA	TCGA-DK-A2HX-01A	tumor	0.205357
BLCA	TCGA-DK-A2I1-01A	tumor	0.080125
BLCA	TCGA-DK-A2I2-01A	tumor	0.354877
BLCA	TCGA-DK-A2I4-01A	tumor	0.374189
BLCA	TCGA-DK-A2I6-01A	tumor	0.168297
BLCA	TCGA-DK-A3IK-01A	tumor	-0.00467942
BLCA	TCGA-DK-A3IL-01A	tumor	-0.0823941
BLCA	TCGA-DK-A3IM-01A	tumor	0.0400607
BLCA	TCGA-DK-A3IN-01A	tumor	0.131123
BLCA	TCGA-DK-A3IQ-01A	tumor	0.0726689
BLCA	TCGA-DK-A3IS-01A	tumor	0.159443
BLCA	TCGA-DK-A3IT-01A	tumor	0.173905
BLCA	TCGA-DK-A3IU-01A	tumor	0.214922
BLCA	TCGA-DK-A3IV-01A	tumor	0.393349
BLCA	TCGA-DK-A3WW-01A	tumor	0.411544
BLCA	TCGA-DK-A3WX-01A	tumor	0.456059
BLCA	TCGA-DK-A3WY-01A	tumor	0.144082
BLCA	TCGA-DK-A3X1-01A	tumor	0.0237654
BLCA	TCGA-DK-A3X2-01A	tumor	-0.0505389
BLCA	TCGA-DK-A6AV-01A	tumor	-0.0966508
BLCA	TCGA-DK-A6AW-01A	tumor	0.168736
BLCA	TCGA-DK-A6B0-01A	tumor	0.243066
BLCA	TCGA-DK-A6B1-01A	tumor	-0.079826
BLCA	TCGA-DK-A6B2-01A	tumor	0.155823
BLCA	TCGA-DK-A6B5-01A	tumor	0.362672
BLCA	TCGA-DK-A6B6-01A	tumor	0.380453
BLCA	TCGA-DK-AA6L-01A	tumor	0.109428
BLCA	TCGA-DK-AA6M-01A	tumor	0.30666
BLCA	TCGA-DK-AA6P-01A	tumor	0.123941
BLCA	TCGA-DK-AA6Q-01A	tumor	0.222246
BLCA	TCGA-DK-AA6R-01A	tumor	0.173136
BLCA	TCGA-DK-AA6S-01A	tumor	0.321465
BLCA	TCGA-DK-AA6T-01A	tumor	0.029974
BLCA	TCGA-DK-AA6U-01A	tumor	0.0246493
BLCA	TCGA-DK-AA6W-01A	tumor	-0.302494
BLCA	TCGA-DK-AA6X-01A	tumor	0.24715
BLCA	TCGA-DK-AA71-01A	tumor	0.0412845
BLCA	TCGA-DK-AA74-01A	tumor	0.312123
BLCA	TCGA-DK-AA75-01A	tumor	-0.157669
BLCA	TCGA-DK-AA76-01A	tumor	0.0835669
BLCA	TCGA-DK-AA77-01A	tumor	0.198411
BLCA	TCGA-E5-A2PC-01A	tumor	0.307996
BLCA	TCGA-E5-A4TZ-01A	tumor	-0.0317302
BLCA	TCGA-E5-A4U1-01A	tumor	-0.0330126
BLCA	TCGA-E7-A3X6-01A	tumor	0.387983
BLCA	TCGA-E7-A3Y1-01A	tumor	0.138801
BLCA	TCGA-E7-A4IJ-01A	tumor	0.150819
BLCA	TCGA-E7-A4XJ-01A	tumor	0.114641
BLCA	TCGA-E7-A519-01A	tumor	0.26329
BLCA	TCGA-E7-A541-01A	tumor	0.145906
BLCA	TCGA-E7-A5KE-01A	tumor	-0.128205
BLCA	TCGA-E7-A5KF-01A	tumor	0.417339
BLCA	TCGA-E7-A677-01A	tumor	0.200524
BLCA	TCGA-E7-A678-01A	tumor	0.315401
BLCA	TCGA-E7-A6MD-01A	tumor	0.234097
BLCA	TCGA-E7-A6ME-01A	tumor	0.178484
BLCA	TCGA-E7-A6MF-01A	tumor	0.242644
BLCA	TCGA-E7-A7DU-01A	tumor	0.105715
BLCA	TCGA-E7-A7DV-01A	tumor	0.264658
BLCA	TCGA-E7-A7PW-01A	tumor	-0.103841
BLCA	TCGA-E7-A7XN-01A	tumor	0.64937
BLCA	TCGA-E7-A85H-01A	tumor	0.0752404
BLCA	TCGA-E7-A8O7-01A	tumor	0.286791
BLCA	TCGA-E7-A8O8-01A	tumor	0.0972791
BLCA	TCGA-E7-A97P-01A	tumor	0.422141
BLCA	TCGA-E7-A97Q-01A	tumor	0.0424688
BLCA	TCGA-FD-A3B3-01A	tumor	0.282564
BLCA	TCGA-FD-A3B4-01A	tumor	0.224265
BLCA	TCGA-FD-A3B5-01A	tumor	0.205921
BLCA	TCGA-FD-A3B6-01A	tumor	0.353647
BLCA	TCGA-FD-A3B7-01A	tumor	0.285442
BLCA	TCGA-FD-A3B8-01A	tumor	0.333118
BLCA	TCGA-FD-A3N5-01A	tumor	0.150652
BLCA	TCGA-FD-A3N6-01A	tumor	0.209485
BLCA	TCGA-FD-A3NA-01A	tumor	0.109108
BLCA	TCGA-FD-A3SJ-01A	tumor	-0.123143
BLCA	TCGA-FD-A3SL-01A	tumor	-0.0730212
BLCA	TCGA-FD-A3SM-01A	tumor	0.167918
BLCA	TCGA-FD-A3SN-01A	tumor	0.141624
BLCA	TCGA-FD-A3SO-01A	tumor	0.330358
BLCA	TCGA-FD-A3SP-01A	tumor	0.209632
BLCA	TCGA-FD-A3SQ-01A	tumor	0.195831
BLCA	TCGA-FD-A3SR-01A	tumor	0.25303
BLCA	TCGA-FD-A3SS-01A	tumor	0.0669891
BLCA	TCGA-FD-A43N-01A	tumor	0.00112136
BLCA	TCGA-FD-A43P-01A	tumor	0.195386
BLCA	TCGA-FD-A43S-01A	tumor	0.211437
BLCA	TCGA-FD-A43U-01A	tumor	0.0938623
BLCA	TCGA-FD-A43X-01A	tumor	0.108465
BLCA	TCGA-FD-A43Y-01A	tumor	0.333937
BLCA	TCGA-FD-A5BR-01A	tumor	0.0437147
BLCA	TCGA-FD-A5BS-01A	tumor	0.333929
BLCA	TCGA-FD-A5BT-01A	tumor	0.182868
BLCA	TCGA-FD-A5BU-01A	tumor	0.285911
BLCA	TCGA-FD-A5BV-01A	tumor	-0.0659395
BLCA	TCGA-FD-A5BX-01A	tumor	0.234527
BLCA	TCGA-FD-A5BY-01A	tumor	0.17228
BLCA	TCGA-FD-A5BZ-01A	tumor	-0.068966
BLCA	TCGA-FD-A5C0-01A	tumor	0.196679
BLCA	TCGA-FD-A5C1-01A	tumor	0.304287
BLCA	TCGA-FD-A62N-01A	tumor	0.341514
BLCA	TCGA-FD-A62O-01A	tumor	0.00505279
BLCA	TCGA-FD-A62P-01A	tumor	0.0453012
BLCA	TCGA-FD-A62S-01A	tumor	0.264725
BLCA	TCGA-FD-A6TA-01A	tumor	0.111203
BLCA	TCGA-FD-A6TB-01A	tumor	0.14736
BLCA	TCGA-FD-A6TC-01A	tumor	0.0223216
BLCA	TCGA-FD-A6TD-01A	tumor	0.295145
BLCA	TCGA-FD-A6TE-01A	tumor	0.041573
BLCA	TCGA-FD-A6TF-01A	tumor	-0.0355906
BLCA	TCGA-FD-A6TG-01A	tumor	-0.00769426
BLCA	TCGA-FD-A6TH-01A	tumor	0.0903822
BLCA	TCGA-FD-A6TI-01A	tumor	0.116038
BLCA	TCGA-FD-A6TK-01A	tumor	0.375073
BLCA	TCGA-FJ-A3Z7-01A	tumor	-0.0461794
BLCA	TCGA-FJ-A3Z9-01A	tumor	0.0696551
BLCA	TCGA-FJ-A3ZE-01A	tumor	-0.0444979
BLCA	TCGA-FJ-A3ZF-01A	tumor	-0.116106
BLCA	TCGA-FJ-A871-01A	tumor	0.120593
BLCA	TCGA-FT-A3EE-01A	tumor	0.216804
BLCA	TCGA-FT-A61P-01A	tumor	0.336374
BLCA	TCGA-G2-A2EC-01A	tumor	0.128618
BLCA	TCGA-G2-A2EF-01A	tumor	0.369262
BLCA	TCGA-G2-A2EJ-01A	tumor	0.516646
BLCA	TCGA-G2-A2EK-01A	tumor	0.141408
BLCA	TCGA-G2-A2EL-01A	tumor	-0.310334
BLCA	TCGA-G2-A2EO-01A	tumor	-0.146478
BLCA	TCGA-G2-A2ES-01A	tumor	0.383762
BLCA	TCGA-G2-A3IB-01A	tumor	0.255173
BLCA	TCGA-G2-A3IE-01A	tumor	0.0897501
BLCA	TCGA-G2-A3VY-01A	tumor	-0.0627687
BLCA	TCGA-G2-AA3B-01A	tumor	0.0970181
BLCA	TCGA-G2-AA3C-01A	tumor	0.344014
BLCA	TCGA-G2-AA3D-01A	tumor	0.130406
BLCA	TCGA-G2-AA3F-01A	tumor	-0.0172602
BLCA	TCGA-GC-A3BM-01A	tumor	0.0673822
BLCA	TCGA-GC-A3BM-11A	normal	0.213296
BLCA	TCGA-GC-A3I6-01A	tumor	0.288183
BLCA	TCGA-GC-A3OO-01A	tumor	0.0196501
BLCA	TCGA-GC-A3RB-01A	tumor	0.100152
BLCA	TCGA-GC-A3RC-01A	tumor	0.255644
BLCA	TCGA-GC-A3RD-01A	tumor	0.173729
BLCA	TCGA-GC-A3WC-01A	tumor	0.113665
BLCA	TCGA-GC-A3WC-11A	normal	0.0449614
BLCA	TCGA-GC-A3YS-01A	tumor	0.0693706
BLCA	TCGA-GC-A4ZW-01A	tumor	0.0204023
BLCA	TCGA-GC-A6I1-01A	tumor	0.565041
BLCA	TCGA-GC-A6I3-01A	tumor	0.0375683
BLCA	TCGA-GC-A6I3-11A	normal	0.277965
BLCA	TCGA-GD-A2C5-01A	tumor	0.100948
BLCA	TCGA-GD-A2C5-11A	normal	0.173363
BLCA	TCGA-GD-A3OP-01A	tumor	0.0793035
BLCA	TCGA-GD-A3OP-11A	normal	0.280574
BLCA	TCGA-GD-A3OQ-01A	tumor	0.369623
BLCA	TCGA-GD-A3OQ-11A	normal	0.100806
BLCA	TCGA-GD-A3OS-01A	tumor	0.239248
BLCA	TCGA-GD-A6C6-01A	tumor	0.283982
BLCA	TCGA-GD-A76B-01A	tumor	0.126623
BLCA	TCGA-GU-A42P-01A	tumor	-0.0538426
BLCA	TCGA-GU-A42Q-01A	tumor	-0.0152225
BLCA	TCGA-GU-A42R-01A	tumor	0.0974132
BLCA	TCGA-GU-A762-01A	tumor	0.520523
BLCA	TCGA-GU-A763-01A	tumor	0.221934
BLCA	TCGA-GU-A764-01A	tumor	0.20713
BLCA	TCGA-GU-A766-01A	tumor	0.536163
BLCA	TCGA-GU-A767-01A	tumor	-0.00291016
BLCA	TCGA-GU-AATO-01A	tumor	0.187781
BLCA	TCGA-GU-AATP-01A	tumor	0.137664
BLCA	TCGA-GU-AATQ-01A	tumor	0.160022
BLCA	TCGA-GV-A3JV-01A	tumor	-0.0700171
BLCA	TCGA-GV-A3JW-01A	tumor	-0.0581122
BLCA	TCGA-GV-A3JX-01A	tumor	0.192638
BLCA	TCGA-GV-A3JZ-01A	tumor	-0.0839442
BLCA	TCGA-GV-A3QF-01A	tumor	-0.141147
BLCA	TCGA-GV-A3QG-01A	tumor	0.10847
BLCA	TCGA-GV-A3QH-01A	tumor	0.00323706
BLCA	TCGA-GV-A3QI-01A	tumor	-0.0680675
BLCA	TCGA-GV-A3QK-01B	tumor	0.26642
BLCA	TCGA-GV-A40E-01A	tumor	0.4138
BLCA	TCGA-GV-A40G-01A	tumor	-0.0661126
BLCA	TCGA-GV-A6ZA-01A	tumor	0.124617
BLCA	TCGA-H4-A2HO-01A	tumor	-0.069427
BLCA	TCGA-H4-A2HQ-01A	tumor	0.150665
BLCA	TCGA-HQ-A2OE-01A	tumor	-0.101217
BLCA	TCGA-HQ-A2OF-01A	tumor	-0.00552463
BLCA	TCGA-HQ-A5ND-01A	tumor	0.307495
BLCA	TCGA-HQ-A5NE-01A	tumor	0.27669
BLCA	TCGA-K4-A3WS-01A	tumor	0.104905
BLCA	TCGA-K4-A3WU-01B	tumor	0.0299273
BLCA	TCGA-K4-A3WV-01A	tumor	0.0717749
BLCA	TCGA-K4-A3WV-11A	normal	0.11162
BLCA	TCGA-K4-A4AB-01B	tumor	0.214402
BLCA	TCGA-K4-A4AC-01A	tumor	0.215514
BLCA	TCGA-K4-A54R-01A	tumor	0.142485
BLCA	TCGA-K4-A54R-11A	normal	0.230562
BLCA	TCGA-K4-A5RH-01A	tumor	0.221676
BLCA	TCGA-K4-A5RI-01A	tumor	0.0784286
BLCA	TCGA-K4-A5RI-11A	normal	0.210429
BLCA	TCGA-K4-A5RJ-01A	tumor	0.250332
BLCA	TCGA-K4-A6FZ-01A	tumor	0.363777
BLCA	TCGA-K4-A6MB-01A	tumor	-0.091432
BLCA	TCGA-K4-A83P-01A	tumor	0.0326111
BLCA	TCGA-K4-AAQO-01A	tumor	-0.00302845
BLCA	TCGA-KQ-A41N-01A	tumor	-0.114431
BLCA	TCGA-KQ-A41O-01A	tumor	0.177162
BLCA	TCGA-KQ-A41P-01A	tumor	0.00154431
BLCA	TCGA-KQ-A41Q-01A	tumor	0.0416337
BLCA	TCGA-KQ-A41R-01A	tumor	-0.187193
BLCA	TCGA-KQ-A41S-01A	tumor	0.0413496
BLCA	TCGA-LC-A66R-01A	tumor	0.196365
BLCA	TCGA-LT-A5Z6-01A	tumor	-0.0085546
BLCA	TCGA-LT-A8JT-01A	tumor	0.238863
BLCA	TCGA-MV-A51V-01A	tumor	-0.0185987
BLCA	TCGA-PQ-A6FI-01A	tumor	0.315673
BLCA	TCGA-PQ-A6FN-01A	tumor	0.076169
BLCA	TCGA-R3-A69X-01A	tumor	0.215219
BLCA	TCGA-S5-A6DX-01A	tumor	0.0307084
BLCA	TCGA-S5-AA26-01A	tumor	0.00600982
BLCA	TCGA-SY-A9G0-01A	tumor	-0.0145394
BLCA	TCGA-SY-A9G5-01A	tumor	0.44264
BLCA	TCGA-UY-A78K-01A	tumor	0.180025
BLCA	TCGA-UY-A78L-01A	tumor	0.209237
BLCA	TCGA-UY-A78M-01A	tumor	0.131051
BLCA	TCGA-UY-A78N-01A	tumor	-0.250412
BLCA	TCGA-UY-A78O-01A	tumor	-0.0964513
BLCA	TCGA-UY-A78P-01A	tumor	0.336212
BLCA	TCGA-UY-A8OB-01A	tumor	0.157417
BLCA	TCGA-UY-A8OC-01A	tumor	0.116084
BLCA	TCGA-UY-A8OD-01A	tumor	-0.0914907
BLCA	TCGA-UY-A9PA-01A	tumor	0.399053
BLCA	TCGA-UY-A9PB-01A	tumor	0.355106
BLCA	TCGA-UY-A9PD-01A	tumor	-0.0488953
BLCA	TCGA-UY-A9PE-01A	tumor	-0.0992849
BLCA	TCGA-UY-A9PF-01A	tumor	0.0918023
BLCA	TCGA-UY-A9PH-01A	tumor	0.297397
BLCA	TCGA-XF-A8HB-01A	tumor	0.0620741
BLCA	TCGA-XF-A8HC-01A	tumor	-0.0621755
BLCA	TCGA-XF-A8HD-01A	tumor	0.392039
BLCA	TCGA-XF-A8HE-01A	tumor	0.362974
BLCA	TCGA-XF-A8HF-01A	tumor	0.0494133
BLCA	TCGA-XF-A8HG-01A	tumor	-0.138439
BLCA	TCGA-XF-A8HH-01A	tumor	-0.153697
BLCA	TCGA-XF-A8HI-01A	tumor	0.260503
BLCA	TCGA-XF-A9SH-01A	tumor	-0.115901
BLCA	TCGA-XF-A9SI-01A	tumor	0.360641
BLCA	TCGA-XF-A9SJ-01A	tumor	0.323317
BLCA	TCGA-XF-A9SK-01A	tumor	0.319501
BLCA	TCGA-XF-A9SL-01A	tumor	0.0903875
BLCA	TCGA-XF-A9SM-01A	tumor	0.341239
BLCA	TCGA-XF-A9SP-01A	tumor	0.0452722
BLCA	TCGA-XF-A9ST-01A	tumor	-0.230807
BLCA	TCGA-XF-A9SU-01A	tumor	0.0878624
BLCA	TCGA-XF-A9SV-01A	tumor	-0.00541062
BLCA	TCGA-XF-A9SW-01A	tumor	0.0561698
BLCA	TCGA-XF-A9SX-01A	tumor	0.221952
BLCA	TCGA-XF-A9SY-01A	tumor	0.447891
BLCA	TCGA-XF-A9SZ-01A	tumor	0.09351
BLCA	TCGA-XF-A9T0-01A	tumor	-0.167463
BLCA	TCGA-XF-A9T2-01A	tumor	-0.0955705
BLCA	TCGA-XF-A9T3-01A	tumor	0.261975
BLCA	TCGA-XF-A9T4-01A	tumor	0.504836
BLCA	TCGA-XF-A9T5-01A	tumor	0.45924
BLCA	TCGA-XF-A9T6-01A	tumor	0.294873
BLCA	TCGA-XF-A9T8-01A	tumor	0.25185
BLCA	TCGA-XF-AAME-01A	tumor	0.166049
BLCA	TCGA-XF-AAMG-01A	tumor	-0.345905
BLCA	TCGA-XF-AAMH-01A	tumor	-0.0180854
BLCA	TCGA-XF-AAMJ-01A	tumor	0.0458034
BLCA	TCGA-XF-AAML-01A	tumor	0.251771
BLCA	TCGA-XF-AAMQ-01A	tumor	0.143018
BLCA	TCGA-XF-AAMR-01A	tumor	0.081042
BLCA	TCGA-XF-AAMT-01A	tumor	0.20312
BLCA	TCGA-XF-AAMW-01A	tumor	0.2923
BLCA	TCGA-XF-AAMX-01A	tumor	-0.127926
BLCA	TCGA-XF-AAMY-01A	tumor	-0.073018
BLCA	TCGA-XF-AAMZ-01A	tumor	-0.00565383
BLCA	TCGA-XF-AAN0-01A	tumor	0.171099
BLCA	TCGA-XF-AAN1-01A	tumor	0.150742
BLCA	TCGA-XF-AAN2-01A	tumor	0.455881
BLCA	TCGA-XF-AAN3-01A	tumor	0.0806425
BLCA	TCGA-XF-AAN4-01A	tumor	0.301026
BLCA	TCGA-XF-AAN5-01A	tumor	0.341537
BLCA	TCGA-XF-AAN7-01A	tumor	-0.0876007
BLCA	TCGA-XF-AAN8-01A	tumor	0.279287
BLCA	TCGA-YC-A89H-01A	tumor	0.0404649
BLCA	TCGA-YC-A8S6-01A	tumor	0.170148
BLCA	TCGA-YC-A9TC-01A	tumor	-0.0369749
BLCA	TCGA-YF-AA3L-01A	tumor	0.0865602
BLCA	TCGA-YF-AA3M-01A	tumor	0.044738
BLCA	TCGA-ZF-A9R0-01A	tumor	-0.00613896
BLCA	TCGA-ZF-A9R1-01A	tumor	0.173329
BLCA	TCGA-ZF-A9R2-01A	tumor	0.00297742
BLCA	TCGA-ZF-A9R3-01A	tumor	0.193121
BLCA	TCGA-ZF-A9R4-01A	tumor	0.0922184
BLCA	TCGA-ZF-A9R5-01A	tumor	0.27401
BLCA	TCGA-ZF-A9R7-01A	tumor	0.506936
BLCA	TCGA-ZF-A9R9-01A	tumor	-0.0934996
BLCA	TCGA-ZF-A9RC-01A	tumor	-0.111089
BLCA	TCGA-ZF-A9RD-01A	tumor	0.39659
BLCA	TCGA-ZF-A9RE-01A	tumor	0.055187
BLCA	TCGA-ZF-A9RF-01A	tumor	0.25021
BLCA	TCGA-ZF-A9RL-01A	tumor	-0.0330496
BLCA	TCGA-ZF-A9RM-01A	tumor	0.0484121
BLCA	TCGA-ZF-A9RN-01A	tumor	0.251711
BLCA	TCGA-ZF-AA4N-01A	tumor	0.00635342
BLCA	TCGA-ZF-AA4R-01A	tumor	0.0237925
BLCA	TCGA-ZF-AA4T-01A	tumor	0.172606
BLCA	TCGA-ZF-AA4U-01A	tumor	0.163637
BLCA	TCGA-ZF-AA4V-01A	tumor	0.368011
BLCA	TCGA-ZF-AA4W-01A	tumor	0.1309
BLCA	TCGA-ZF-AA4X-01A	tumor	0.0564897
BLCA	TCGA-ZF-AA51-01A	tumor	0.0751755
BLCA	TCGA-ZF-AA52-01A	tumor	0.0448163
BLCA	TCGA-ZF-AA53-01A	tumor	0.319444
BLCA	TCGA-ZF-AA54-01A	tumor	0.120093
BLCA	TCGA-ZF-AA56-01A	tumor	0.245782
BLCA	TCGA-ZF-AA58-01A	tumor	0.623423
BLCA	TCGA-ZF-AA5H-01A	tumor	0.332603
BLCA	TCGA-ZF-AA5N-01A	tumor	0.201594
BLCA	TCGA-ZF-AA5P-01A	tumor	0.289013
BRCA	TCGA-3C-AAAU-01A	tumor	0.00607179
BRCA	TCGA-3C-AALI-01A	tumor	0.015355
BRCA	TCGA-3C-AALJ-01A	tumor	-0.0187829
BRCA	TCGA-3C-AALK-01A	tumor	0.00616737
BRCA	TCGA-4H-AAAK-01A	tumor	0.0214502
BRCA	TCGA-5L-AAT0-01A	tumor	0.127763
BRCA	TCGA-5L-AAT1-01A	tumor	0.234866
BRCA	TCGA-5T-A9QA-01A	tumor	0.163391
BRCA	TCGA-A1-A0SB-01A	tumor	-0.165595
BRCA	TCGA-A1-A0SD-01A	tumor	0.174371
BRCA	TCGA-A1-A0SE-01A	tumor	0.160683
BRCA	TCGA-A1-A0SF-01A	tumor	0.0481585
BRCA	TCGA-A1-A0SG-01A	tumor	0.00997435
BRCA	TCGA-A1-A0SH-01A	tumor	0.141255
BRCA	TCGA-A1-A0SI-01A	tumor	0.249241
BRCA	TCGA-A1-A0SJ-01A	tumor	-0.026568
BRCA	TCGA-A1-A0SK-01A	tumor	-0.30115
BRCA	TCGA-A1-A0SM-01A	tumor	0.106721
BRCA	TCGA-A1-A0SN-01A	tumor	0.154355
BRCA	TCGA-A1-A0SO-01A	tumor	-0.140288
BRCA	TCGA-A1-A0SP-01A	tumor	0.0183281
BRCA	TCGA-A1-A0SQ-01A	tumor	-0.0105028
BRCA	TCGA-A2-A04N-01A	tumor	0.108271
BRCA	TCGA-A2-A04P-01A	tumor	0.14139
BRCA	TCGA-A2-A04Q-01A	tumor	0.344128
BRCA	TCGA-A2-A04R-01A	tumor	-0.00150531
BRCA	TCGA-A2-A04T-01A	tumor	0.116808
BRCA	TCGA-A2-A04U-01A	tumor	-0.148735
BRCA	TCGA-A2-A04V-01A	tumor	0.0975076
BRCA	TCGA-A2-A04W-01A	tumor	-0.101701
BRCA	TCGA-A2-A04X-01A	tumor	0.347436
BRCA	TCGA-A2-A04Y-01A	tumor	0.12239
BRCA	TCGA-A2-A0CK-01A	tumor	0.245365
BRCA	TCGA-A2-A0CL-01A	tumor	0.326749
BRCA	TCGA-A2-A0CM-01A	tumor	0.37752
BRCA	TCGA-A2-A0CO-01A	tumor	0.160088
BRCA	TCGA-A2-A0CP-01A	tumor	0.00106644
BRCA	TCGA-A2-A0CQ-01A	tumor	0.162964
BRCA	TCGA-A2-A0CR-01A	tumor	0.260707
BRCA	TCGA-A2-A0CS-01A	tumor	0.0787462
BRCA	TCGA-A2-A0CT-01A	tumor	-0.0766384
BRCA	TCGA-A2-A0CU-01A	tumor	-0.0305475
BRCA	TCGA-A2-A0CV-01A	tumor	0.108894
BRCA	TCGA-A2-A0CW-01A	tumor	0.0807118
BRCA	TCGA-A2-A0CX-01A	tumor	-0.0389086
BRCA	TCGA-A2-A0CY-01A	tumor	-0.0528565
BRCA	TCGA-A2-A0CZ-01A	tumor	0.0991967
BRCA	TCGA-A2-A0D0-01A	tumor	0.0575893
BRCA	TCGA-A2-A0D1-01A	tumor	-0.146304
BRCA	TCGA-A2-A0D2-01A	tumor	0.143762
BRCA	TCGA-A2-A0D3-01A	tumor	0.0654147
BRCA	TCGA-A2-A0D4-01A	tumor	0.175622
BRCA	TCGA-A2-A0EM-01A	tumor	0.0972185
BRCA	TCGA-A2-A0EN-01A	tumor	0.318717
BRCA	TCGA-A2-A0EO-01A	tumor	0.142517
BRCA	TCGA-A2-A0EP-01A	tumor	0.259024
BRCA	TCGA-A2-A0EQ-01A	tumor	0.240226
BRCA	TCGA-A2-A0ER-01A	tumor	0.143065
BRCA	TCGA-A2-A0ES-01A	tumor	0.0990334
BRCA	TCGA-A2-A0ET-01A	tumor	0.156471
BRCA	TCGA-A2-A0EU-01A	tumor	0.138486
BRCA	TCGA-A2-A0EV-01A	tumor	0.212841
BRCA	TCGA-A2-A0EW-01A	tumor	0.05305
BRCA	TCGA-A2-A0EX-01A	tumor	0.054078
BRCA	TCGA-A2-A0EY-01A	tumor	0.0324127
BRCA	TCGA-A2-A0ST-01A	tumor	0.599359
BRCA	TCGA-A2-A0SU-01A	tumor	0.0526128
BRCA	TCGA-A2-A0SV-01A	tumor	0.13579
BRCA	TCGA-A2-A0SW-01A	tumor	0.2378
BRCA	TCGA-A2-A0SX-01A	tumor	0.216095
BRCA	TCGA-A2-A0SY-01A	tumor	0.0817087
BRCA	TCGA-A2-A0T0-01A	tumor	-0.065256
BRCA	TCGA-A2-A0T1-01A	tumor	0.219339
BRCA	TCGA-A2-A0T2-01A	tumor	0.0228072
BRCA	TCGA-A2-A0T3-01A	tumor	0.306633
BRCA	TCGA-A2-A0T4-01A	tumor	0.227246
BRCA	TCGA-A2-A0T5-01A	tumor	0.0537164
BRCA	TCGA-A2-A0T6-01A	tumor	0.151839
BRCA	TCGA-A2-A0T7-01A	tumor	0.10526
BRCA	TCGA-A2-A0YC-01A	tumor	0.196806
BRCA	TCGA-A2-A0YD-01A	tumor	0.202592
BRCA	TCGA-A2-A0YE-01A	tumor	-0.0822079
BRCA	TCGA-A2-A0YF-01A	tumor	0.326975
BRCA	TCGA-A2-A0YG-01A	tumor	-0.0558981
BRCA	TCGA-A2-A0YH-01A	tumor	0.243513
BRCA	TCGA-A2-A0YI-01A	tumor	0.272069
BRCA	TCGA-A2-A0YJ-01A	tumor	0.0437681
BRCA	TCGA-A2-A0YK-01A	tumor	0.190379
BRCA	TCGA-A2-A0YL-01A	tumor	0.115455
BRCA	TCGA-A2-A0YM-01A	tumor	0.289233
BRCA	TCGA-A2-A0YT-01A	tumor	0.206667
BRCA	TCGA-A2-A1FV-01A	tumor	-0.256858
BRCA	TCGA-A2-A1FW-01A	tumor	-0.0934829
BRCA	TCGA-A2-A1FX-01A	tumor	0.261787
BRCA	TCGA-A2-A1FZ-01A	tumor	0.0751915
BRCA	TCGA-A2-A1G0-01A	tumor	0.133748
BRCA	TCGA-A2-A1G1-01A	tumor	0.284057
BRCA	TCGA-A2-A1G4-01A	tumor	-0.0358218
BRCA	TCGA-A2-A1G6-01A	tumor	0.0877648
BRCA	TCGA-A2-A259-01A	tumor	0.138109
BRCA	TCGA-A2-A25A-01A	tumor	0.269322
BRCA	TCGA-A2-A25B-01A	tumor	0.0734104
BRCA	TCGA-A2-A25C-01A	tumor	0.318
BRCA	TCGA-A2-A25D-01A	tumor	0.184122
BRCA	TCGA-A2-A25E-01A	tumor	-0.0287203
BRCA	TCGA-A2-A25F-01A	tumor	0.442479
BRCA	TCGA-A2-A3KC-01A	tumor	0.233698
BRCA	TCGA-A2-A3KD-01A	tumor	-0.0268369
BRCA	TCGA-A2-A3XS-01A	tumor	-0.0683449
BRCA	TCGA-A2-A3XT-01A	tumor	0.0611971
BRCA	TCGA-A2-A3XU-01A	tumor	0.0590765
BRCA	TCGA-A2-A3XV-01A	tumor	-0.00471711
BRCA	TCGA-A2-A3XW-01A	tumor	0.192944
BRCA	TCGA-A2-A3XX-01A	tumor	0.0112894
BRCA	TCGA-A2-A3XY-01A	tumor	0.188181
BRCA	TCGA-A2-A3XZ-01A	tumor	0.181278
BRCA	TCGA-A2-A3Y0-01A	tumor	0.260557
BRCA	TCGA-A2-A4RW-01A	tumor	0.0839221
BRCA	TCGA-A2-A4RX-01A	tumor	-0.0350168
BRCA	TCGA-A2-A4RY-01A	tumor	0.0968261
BRCA	TCGA-A2-A4S0-01A	tumor	-0.174799
BRCA	TCGA-A2-A4S1-01A	tumor	0.343196
BRCA	TCGA-A2-A4S2-01A	tumor	0.234062
BRCA	TCGA-A2-A4S3-01A	tumor	0.0362281
BRCA	TCGA-A7-A0CD-01A	tumor	0.0845304
BRCA	TCGA-A7-A0CE-01A	tumor	0.137948
BRCA	TCGA-A7-A0CE-11A	normal	0.0965571
BRCA	TCGA-A7-A0CG-01A	tumor	0.194181
BRCA	TCGA-A7-A0CH-01A	tumor	0.15678
BRCA	TCGA-A7-A0CH-11A	normal	0.0787852
BRCA	TCGA-A7-A0CJ-01A	tumor	0.0803675
BRCA	TCGA-A7-A0D9-01A	tumor	-0.096071
BRCA	TCGA-A7-A0D9-11A	normal	0.277341
BRCA	TCGA-A7-A0DA-01A	tumor	0.12521
BRCA	TCGA-A7-A0DB-01A	tumor	0.000306131
BRCA	TCGA-A7-A0DB-11A	normal	0.281181
BRCA	TCGA-A7-A0DC-01A	tumor	-0.108963
BRCA	TCGA-A7-A0DC-11A	normal	0.0859461
BRCA	TCGA-A7-A13D-01A	tumor	-0.0405039
BRCA	TCGA-A7-A13E-01A	tumor	-0.114005
BRCA	TCGA-A7-A13E-11A	normal	0.157789
BRCA	TCGA-A7-A13F-01A	tumor	-0.0575372
BRCA	TCGA-A7-A13F-11A	normal	0.0414628
BRCA	TCGA-A7-A13G-01A	tumor	0.0264956
BRCA	TCGA-A7-A13G-11A	normal	0.210198
BRCA	TCGA-A7-A13H-01A	tumor	0.21741
BRCA	TCGA-A7-A26E-01A	tumor	-0.00939273
BRCA	TCGA-A7-A26F-01A	tumor	0.443091
BRCA	TCGA-A7-A26G-01A	tumor	0.159759
BRCA	TCGA-A7-A26H-01A	tumor	0.0164413
BRCA	TCGA-A7-A26I-01A	tumor	0.077254
BRCA	TCGA-A7-A26J-01A	tumor	0.277709
BRCA	TCGA-A7-A2KD-01A	tumor	-0.0427522
BRCA	TCGA-A7-A3IY-01A	tumor	0.091218
BRCA	TCGA-A7-A3IZ-01A	tumor	-0.0754176
BRCA	TCGA-A7-A3J0-01A	tumor	-0.00960524
BRCA	TCGA-A7-A3J1-01A	tumor	0.304786
BRCA	TCGA-A7-A3RF-01A	tumor	-0.192574
BRCA	TCGA-A7-A425-01A	tumor	0.102121
BRCA	TCGA-A7-A426-01A	tumor	0.0159954
BRCA	TCGA-A7-A4SA-01A	tumor	0.0143554
BRCA	TCGA-A7-A4SB-01A	tumor	0.219673
BRCA	TCGA-A7-A4SC-01A	tumor	-0.00277482
BRCA	TCGA-A7-A4SD-01A	tumor	0.22271
BRCA	TCGA-A7-A4SE-01A	tumor	0.16262
BRCA	TCGA-A7-A4SF-01A	tumor	0.124755
BRCA	TCGA-A7-A56D-01A	tumor	0.149681
BRCA	TCGA-A7-A5ZV-01A	tumor	-0.0100859
BRCA	TCGA-A7-A5ZW-01A	tumor	0.172863
BRCA	TCGA-A7-A5ZX-01A	tumor	0.0268603
BRCA	TCGA-A7-A6VV-01A	tumor	0.0380076
BRCA	TCGA-A7-A6VW-01A	tumor	0.213237
BRCA	TCGA-A7-A6VX-01A	tumor	0.0904187
BRCA	TCGA-A7-A6VY-01A	tumor	0.189077
BRCA	TCGA-A8-A06N-01A	tumor	0.12195
BRCA	TCGA-A8-A06O-01A	tumor	0.108102
BRCA	TCGA-A8-A06P-01A	tumor	0.153756
BRCA	TCGA-A8-A06Q-01A	tumor	0.0119489
BRCA	TCGA-A8-A06R-01A	tumor	0.0226764
BRCA	TCGA-A8-A06T-01A	tumor	0.286702
BRCA	TCGA-A8-A06U-01A	tumor	0.152753
BRCA	TCGA-A8-A06X-01A	tumor	0.361502
BRCA	TCGA-A8-A06Y-01A	tumor	0.260376
BRCA	TCGA-A8-A06Z-01A	tumor	-0.147479
BRCA	TCGA-A8-A075-01A	tumor	0.202157
BRCA	TCGA-A8-A076-01A	tumor	0.162146
BRCA	TCGA-A8-A079-01A	tumor	0.0578419
BRCA	TCGA-A8-A07B-01A	tumor	0.0651643
BRCA	TCGA-A8-A07C-01A	tumor	0.0262159
BRCA	TCGA-A8-A07E-01A	tumor	0.337379
BRCA	TCGA-A8-A07F-01A	tumor	0.224614
BRCA	TCGA-A8-A07G-01A	tumor	0.202398
BRCA	TCGA-A8-A07I-01A	tumor	0.232164
BRCA	TCGA-A8-A07J-01A	tumor	0.251684
BRCA	TCGA-A8-A07L-01A	tumor	0.010735
BRCA	TCGA-A8-A07O-01A	tumor	0.301603
BRCA	TCGA-A8-A07P-01A	tumor	0.0616967
BRCA	TCGA-A8-A07R-01A	tumor	0.215224
BRCA	TCGA-A8-A07S-01A	tumor	0.173548
BRCA	TCGA-A8-A07U-01A	tumor	0.600763
BRCA	TCGA-A8-A07W-01A	tumor	0.0931027
BRCA	TCGA-A8-A07Z-01A	tumor	0.293433
BRCA	TCGA-A8-A081-01A	tumor	0.0209227
BRCA	TCGA-A8-A082-01A	tumor	0.0835529
BRCA	TCGA-A8-A083-01A	tumor	0.216809
BRCA	TCGA-A8-A084-01A	tumor	0.0836686
BRCA	TCGA-A8-A085-01A	tumor	0.0901721
BRCA	TCGA-A8-A086-01A	tumor	0.0895451
BRCA	TCGA-A8-A08A-01A	tumor	0.159981
BRCA	TCGA-A8-A08B-01A	tumor	0.120177
BRCA	TCGA-A8-A08C-01A	tumor	0.268962
BRCA	TCGA-A8-A08F-01A	tumor	0.114059
BRCA	TCGA-A8-A08G-01A	tumor	0.273003
BRCA	TCGA-A8-A08H-01A	tumor	0.308867
BRCA	TCGA-A8-A08I-01A	tumor	0.281264
BRCA	TCGA-A8-A08J-01A	tumor	0.176054
BRCA	TCGA-A8-A08L-01A	tumor	-0.0755297
BRCA	TCGA-A8-A08O-01A	tumor	0.0853071
BRCA	TCGA-A8-A08P-01A	tumor	0.343827
BRCA	TCGA-A8-A08R-01A	tumor	0.23761
BRCA	TCGA-A8-A08S-01A	tumor	0.047008
BRCA	TCGA-A8-A08T-01A	tumor	0.00696827
BRCA	TCGA-A8-A08X-01A	tumor	0.120021
BRCA	TCGA-A8-A08Z-01A	tumor	0.120542
BRCA	TCGA-A8-A090-01A	tumor	0.206565
BRCA	TCGA-A8-A091-01A	tumor	-0.0213883
BRCA	TCGA-A8-A092-01A	tumor	0.101525
BRCA	TCGA-A8-A093-01A	tumor	0.232474
BRCA	TCGA-A8-A094-01A	tumor	0.187855
BRCA	TCGA-A8-A095-01A	tumor	0.113927
BRCA	TCGA-A8-A096-01A	tumor	0.512589
BRCA	TCGA-A8-A097-01A	tumor	0.182329
BRCA	TCGA-A8-A099-01A	tumor	0.337552
BRCA	TCGA-A8-A09A-01A	tumor	0.0888246
BRCA	TCGA-A8-A09B-01A	tumor	-0.0698828
BRCA	TCGA-A8-A09C-01A	tumor	0.2087
BRCA	TCGA-A8-A09D-01A	tumor	0.0978415
BRCA	TCGA-A8-A09E-01A	tumor	0.144695
BRCA	TCGA-A8-A09G-01A	tumor	0.0688963
BRCA	TCGA-A8-A09I-01A	tumor	0.270543
BRCA	TCGA-A8-A09K-01A	tumor	0.0493328
BRCA	TCGA-A8-A09M-01A	tumor	0.185751
BRCA	TCGA-A8-A09N-01A	tumor	0.25203
BRCA	TCGA-A8-A09Q-01A	tumor	0.0137969
BRCA	TCGA-A8-A09R-01A	tumor	0.228927
BRCA	TCGA-A8-A09T-01A	tumor	0.107985
BRCA	TCGA-A8-A09V-01A	tumor	0.0489133
BRCA	TCGA-A8-A09W-01A	tumor	0.184959
BRCA	TCGA-A8-A09X-01A	tumor	0.217033
BRCA	TCGA-A8-A09Z-01A	tumor	0.493491
BRCA	TCGA-A8-A0A1-01A	tumor	0.28416
BRCA	TCGA-A8-A0A2-01A	tumor	0.151513
BRCA	TCGA-A8-A0A4-01A	tumor	0.0704874
BRCA	TCGA-A8-A0A6-01A	tumor	0.411152
BRCA	TCGA-A8-A0A7-01A	tumor	0.372672
BRCA	TCGA-A8-A0A9-01A	tumor	0.324862
BRCA	TCGA-A8-A0AB-01A	tumor	-0.0616229
BRCA	TCGA-A8-A0AD-01A	tumor	0.040786
BRCA	TCGA-AC-A23C-01A	tumor	0.116187
BRCA	TCGA-AC-A23E-01A	tumor	0.137059
BRCA	TCGA-AC-A23G-01A	tumor	0.076051
BRCA	TCGA-AC-A23H-01A	tumor	0.145643
BRCA	TCGA-AC-A23H-11A	normal	0.156039
BRCA	TCGA-AC-A2B8-01A	tumor	0.162467
BRCA	TCGA-AC-A2BK-01A	tumor	-0.118273
BRCA	TCGA-AC-A2BM-01A	tumor	0.046496
BRCA	TCGA-AC-A2FB-01A	tumor	0.279618
BRCA	TCGA-AC-A2FB-11A	normal	0.111766
BRCA	TCGA-AC-A2FE-01A	tumor	0.183897
BRCA	TCGA-AC-A2FF-01A	tumor	0.190011
BRCA	TCGA-AC-A2FF-11A	normal	0.139983
BRCA	TCGA-AC-A2FG-01A	tumor	0.0863385
BRCA	TCGA-AC-A2FK-01A	tumor	0.154426
BRCA	TCGA-AC-A2FM-01A	tumor	0.0130454
BRCA	TCGA-AC-A2FM-11B	normal	0.147442
BRCA	TCGA-AC-A2FO-01A	tumor	0.0775854
BRCA	TCGA-AC-A2QH-01A	tumor	-0.0737381
BRCA	TCGA-AC-A2QI-01A	tumor	0.151814
BRCA	TCGA-AC-A2QJ-01A	tumor	0.219477
BRCA	TCGA-AC-A3BB-01A	tumor	0.127143
BRCA	TCGA-AC-A3EH-01A	tumor	0.0136557
BRCA	TCGA-AC-A3HN-01A	tumor	0.156705
BRCA	TCGA-AC-A3OD-01A	tumor	0.166917
BRCA	TCGA-AC-A3QP-01A	tumor	0.102823
BRCA	TCGA-AC-A3QQ-01A	tumor	0.2613
BRCA	TCGA-AC-A3TM-01A	tumor	0.162437
BRCA	TCGA-AC-A3TN-01A	tumor	0.0206395
BRCA	TCGA-AC-A3W5-01A	tumor	0.148715
BRCA	TCGA-AC-A3W6-01A	tumor	0.244031
BRCA	TCGA-AC-A3W7-01A	tumor	0.0166507
BRCA	TCGA-AC-A3YI-01A	tumor	0.216273
BRCA	TCGA-AC-A3YJ-01A	tumor	-0.0122042
BRCA	TCGA-AC-A4ZE-01A	tumor	0.0751969
BRCA	TCGA-AC-A5EH-01A	tumor	0.0269463
BRCA	TCGA-AC-A5XS-01A	tumor	0.217915
BRCA	TCGA-AC-A5XU-01A	tumor	-0.0385437
BRCA	TCGA-AC-A62V-01A	tumor	-0.122727
BRCA	TCGA-AC-A62X-01A	tumor	0.413187
BRCA	TCGA-AC-A62Y-01A	tumor	0.170646
BRCA	TCGA-AC-A6IV-01A	tumor	0.161146
BRCA	TCGA-AC-A6IW-01A	tumor	0.181382
BRCA	TCGA-AC-A6IX-01A	tumor	0.28809
BRCA	TCGA-AC-A6IX-06A	tumor	0.27275
BRCA	TCGA-AC-A6NO-01A	tumor	-0.0587103
BRCA	TCGA-AC-A7VB-01A	tumor	-0.0959331
BRCA	TCGA-AC-A7VC-01A	tumor	0.0784345
BRCA	TCGA-AC-A8OP-01A	tumor	0.0260465
BRCA	TCGA-AC-A8OQ-01A	tumor	0.126124
BRCA	TCGA-AC-A8OR-01A	tumor	0.0185866
BRCA	TCGA-AC-A8OS-01A	tumor	0.0780144
BRCA	TCGA-AN-A03X-01A	tumor	0.00162559
BRCA	TCGA-AN-A03Y-01A	tumor	0.211291
BRCA	TCGA-AN-A041-01A	tumor	0.245252
BRCA	TCGA-AN-A046-01A	tumor	0.284014
BRCA	TCGA-AN-A049-01A	tumor	0.158866
BRCA	TCGA-AN-A04A-01A	tumor	-0.0743098
BRCA	TCGA-AN-A04C-01A	tumor	-0.00590477
BRCA	TCGA-AN-A04D-01A	tumor	-0.0961559
BRCA	TCGA-AN-A0AJ-01A	tumor	0.245736
BRCA	TCGA-AN-A0AK-01A	tumor	0.0346752
BRCA	TCGA-AN-A0AL-01A	tumor	0.104354
BRCA	TCGA-AN-A0AM-01A	tumor	0.202621
BRCA	TCGA-AN-A0AR-01A	tumor	-0.0256135
BRCA	TCGA-AN-A0AS-01A	tumor	0.122034
BRCA	TCGA-AN-A0AT-01A	tumor	0.113425
BRCA	TCGA-AN-A0FD-01A	tumor	0.100918
BRCA	TCGA-AN-A0FF-01A	tumor	0.085239
BRCA	TCGA-AN-A0FJ-01A	tumor	-0.0376785
BRCA	TCGA-AN-A0FK-01A	tumor	0.117695
BRCA	TCGA-AN-A0FL-01A	tumor	-0.0478596
BRCA	TCGA-AN-A0FN-01A	tumor	0.316466
BRCA	TCGA-AN-A0FS-01A	tumor	0.199689
BRCA	TCGA-AN-A0FT-01A	tumor	0.0485665
BRCA	TCGA-AN-A0FV-01A	tumor	-0.0928632
BRCA	TCGA-AN-A0FW-01A	tumor	0.163211
BRCA	TCGA-AN-A0FX-01A	tumor	-0.145923
BRCA	TCGA-AN-A0FY-01A	tumor	0.0238113
BRCA	TCGA-AN-A0FZ-01A	tumor	0.304032
BRCA	TCGA-AN-A0G0-01A	tumor	0.0363944
BRCA	TCGA-AN-A0XL-01A	tumor	-0.0652935
BRCA	TCGA-AN-A0XN-01A	tumor	0.109092
BRCA	TCGA-AN-A0XO-01A	tumor	0.00721032
BRCA	TCGA-AN-A0XP-01A	tumor	0.403484
BRCA	TCGA-AN-A0XR-01A	tumor	0.253851
BRCA	TCGA-AN-A0XS-01A	tumor	0.0245223
BRCA	TCGA-AN-A0XT-01A	tumor	-0.0392383
BRCA	TCGA-AN-A0XU-01A	tumor	0.170089
BRCA	TCGA-AN-A0XV-01A	tumor	0.144798
BRCA	TCGA-AN-A0XW-01A	tumor	0.20435
BRCA	TCGA-AO-A03L-01A	tumor	0.249046
BRCA	TCGA-AO-A03M-01B	tumor	0.107549
BRCA	TCGA-AO-A03N-01B	tumor	0.0178055
BRCA	TCGA-AO-A03O-01A	tumor	0.241184
BRCA	TCGA-AO-A03P-01A	tumor	0.0446516
BRCA	TCGA-AO-A03R-01A	tumor	-0.0432823
BRCA	TCGA-AO-A03T-01A	tumor	0.164699
BRCA	TCGA-AO-A03U-01B	tumor	0.418792
BRCA	TCGA-AO-A03V-01A	tumor	0.0110087
BRCA	TCGA-AO-A0J2-01A	tumor	0.278167
BRCA	TCGA-AO-A0J3-01A	tumor	0.0491249
BRCA	TCGA-AO-A0J4-01A	tumor	0.156082
BRCA	TCGA-AO-A0J5-01A	tumor	0.0523256
BRCA	TCGA-AO-A0J6-01A	tumor	0.266684
BRCA	TCGA-AO-A0J7-01A	tumor	-0.0685639
BRCA	TCGA-AO-A0J8-01A	tumor	0.215935
BRCA	TCGA-AO-A0J9-01A	tumor	0.128275
BRCA	TCGA-AO-A0JA-01A	tumor	0.165968
BRCA	TCGA-AO-A0JB-01A	tumor	-0.0767451
BRCA	TCGA-AO-A0JC-01A	tumor	0.405088
BRCA	TCGA-AO-A0JD-01A	tumor	0.193493
BRCA	TCGA-AO-A0JE-01A	tumor	0.403546
BRCA	TCGA-AO-A0JF-01A	tumor	0.254896
BRCA	TCGA-AO-A0JG-01A	tumor	0.20111
BRCA	TCGA-AO-A0JI-01A	tumor	-0.179595
BRCA	TCGA-AO-A0JJ-01A	tumor	0.132093
BRCA	TCGA-AO-A0JL-01A	tumor	-0.131194
BRCA	TCGA-AO-A0JM-01A	tumor	0.185581
BRCA	TCGA-AO-A124-01A	tumor	0.201933
BRCA	TCGA-AO-A125-01A	tumor	-0.0558981
BRCA	TCGA-AO-A126-01A	tumor	0.188781
BRCA	TCGA-AO-A128-01A	tumor	0.55413
BRCA	TCGA-AO-A129-01A	tumor	0.144984
BRCA	TCGA-AO-A12A-01A	tumor	0.242186
BRCA	TCGA-AO-A12B-01A	tumor	0.166576
BRCA	TCGA-AO-A12C-01A	tumor	-0.0337493
BRCA	TCGA-AO-A12D-01A	tumor	0.142487
BRCA	TCGA-AO-A12E-01A	tumor	0.244657
BRCA	TCGA-AO-A12F-01A	tumor	-0.0561722
BRCA	TCGA-AO-A12G-01A	tumor	0.063362
BRCA	TCGA-AO-A12H-01A	tumor	-0.0675383
BRCA	TCGA-AO-A1KO-01A	tumor	0.0936385
BRCA	TCGA-AO-A1KP-01A	tumor	-0.104855
BRCA	TCGA-AO-A1KQ-01A	tumor	0.126774
BRCA	TCGA-AO-A1KR-01A	tumor	0.044715
BRCA	TCGA-AO-A1KS-01A	tumor	-0.0109915
BRCA	TCGA-AO-A1KT-01A	tumor	0.205946
BRCA	TCGA-AQ-A04H-01B	tumor	0.0879761
BRCA	TCGA-AQ-A04J-01A	tumor	0.100136
BRCA	TCGA-AQ-A04L-01B	tumor	0.0977182
BRCA	TCGA-AQ-A0Y5-01A	tumor	0.0119887
BRCA	TCGA-AQ-A1H2-01A	tumor	0.0977786
BRCA	TCGA-AQ-A1H3-01A	tumor	0.135488
BRCA	TCGA-AQ-A54N-01A	tumor	-0.111262
BRCA	TCGA-AQ-A54O-01A	tumor	0.018151
BRCA	TCGA-AQ-A7U7-01A	tumor	0.445202
BRCA	TCGA-AR-A0TP-01A	tumor	-0.0529157
BRCA	TCGA-AR-A0TQ-01A	tumor	-0.00233406
BRCA	TCGA-AR-A0TR-01A	tumor	0.08478
BRCA	TCGA-AR-A0TS-01A	tumor	0.162771
BRCA	TCGA-AR-A0TT-01A	tumor	0.274956
BRCA	TCGA-AR-A0TU-01A	tumor	0.242752
BRCA	TCGA-AR-A0TV-01A	tumor	0.108179
BRCA	TCGA-AR-A0TW-01A	tumor	0.181834
BRCA	TCGA-AR-A0TX-01A	tumor	0.15899
BRCA	TCGA-AR-A0TY-01A	tumor	0.0983922
BRCA	TCGA-AR-A0TZ-01A	tumor	0.0943403
BRCA	TCGA-AR-A0U0-01A	tumor	0.560873
BRCA	TCGA-AR-A0U1-01A	tumor	0.0785662
BRCA	TCGA-AR-A0U2-01A	tumor	0.133281
BRCA	TCGA-AR-A0U3-01A	tumor	0.136338
BRCA	TCGA-AR-A0U4-01A	tumor	0.45975
BRCA	TCGA-AR-A1AH-01A	tumor	-0.00924029
BRCA	TCGA-AR-A1AI-01A	tumor	0.39143
BRCA	TCGA-AR-A1AJ-01A	tumor	0.462379
BRCA	TCGA-AR-A1AK-01A	tumor	0.353084
BRCA	TCGA-AR-A1AL-01A	tumor	0.0422376
BRCA	TCGA-AR-A1AM-01A	tumor	0.159678
BRCA	TCGA-AR-A1AN-01A	tumor	0.1549
BRCA	TCGA-AR-A1AO-01A	tumor	0.282124
BRCA	TCGA-AR-A1AP-01A	tumor	0.276597
BRCA	TCGA-AR-A1AQ-01A	tumor	0.248651
BRCA	TCGA-AR-A1AR-01A	tumor	0.249605
BRCA	TCGA-AR-A1AS-01A	tumor	-0.0406144
BRCA	TCGA-AR-A1AT-01A	tumor	0.228652
BRCA	TCGA-AR-A1AU-01A	tumor	0.0801599
BRCA	TCGA-AR-A1AV-01A	tumor	0.228261
BRCA	TCGA-AR-A1AW-01A	tumor	0.339165
BRCA	TCGA-AR-A1AX-01A	tumor	0.285972
BRCA	TCGA-AR-A1AY-01A	tumor	0.10998
BRCA	TCGA-AR-A24H-01A	tumor	-0.0675843
BRCA	TCGA-AR-A24K-01A	tumor	0.170984
BRCA	TCGA-AR-A24L-01A	tumor	0.181284
BRCA	TCGA-AR-A24M-01A	tumor	0.213835
BRCA	TCGA-AR-A24N-01A	tumor	0.26338
BRCA	TCGA-AR-A24O-01A	tumor	0.195214
BRCA	TCGA-AR-A24P-01A	tumor	0.141678
BRCA	TCGA-AR-A24Q-01A	tumor	0.0527255
BRCA	TCGA-AR-A24R-01A	tumor	0.163
BRCA	TCGA-AR-A24S-01A	tumor	0.160561
BRCA	TCGA-AR-A24T-01A	tumor	0.138214
BRCA	TCGA-AR-A24U-01A	tumor	0.161409
BRCA	TCGA-AR-A24V-01A	tumor	0.243993
BRCA	TCGA-AR-A24W-01A	tumor	0.0406452
BRCA	TCGA-AR-A24X-01A	tumor	0.109116
BRCA	TCGA-AR-A24Z-01A	tumor	0.311957
BRCA	TCGA-AR-A250-01A	tumor	0.167012
BRCA	TCGA-AR-A251-01A	tumor	0.329265
BRCA	TCGA-AR-A252-01A	tumor	0.374824
BRCA	TCGA-AR-A254-01A	tumor	0.121787
BRCA	TCGA-AR-A255-01A	tumor	0.273529
BRCA	TCGA-AR-A256-01A	tumor	-0.00829607
BRCA	TCGA-AR-A2LE-01A	tumor	0.177724
BRCA	TCGA-AR-A2LH-01A	tumor	0.193886
BRCA	TCGA-AR-A2LJ-01A	tumor	0.293734
BRCA	TCGA-AR-A2LK-01A	tumor	0.163811
BRCA	TCGA-AR-A2LL-01A	tumor	0.0589247
BRCA	TCGA-AR-A2LM-01A	tumor	0.0540617
BRCA	TCGA-AR-A2LN-01A	tumor	0.150009
BRCA	TCGA-AR-A2LO-01A	tumor	0.12339
BRCA	TCGA-AR-A2LQ-01A	tumor	0.05456
BRCA	TCGA-AR-A2LR-01A	tumor	-0.203065
BRCA	TCGA-AR-A5QM-01A	tumor	0.0701654
BRCA	TCGA-AR-A5QN-01A	tumor	0.0692384
BRCA	TCGA-AR-A5QP-01A	tumor	0.0637065
BRCA	TCGA-AR-A5QQ-01A	tumor	0.247563
BRCA	TCGA-B6-A0I1-01A	tumor	-0.160152
BRCA	TCGA-B6-A0I2-01A	tumor	0.365155
BRCA	TCGA-B6-A0I5-01A	tumor	0.087969
BRCA	TCGA-B6-A0I6-01A	tumor	-0.116015
BRCA	TCGA-B6-A0I8-01A	tumor	-0.0270296
BRCA	TCGA-B6-A0I9-01A	tumor	0.212434
BRCA	TCGA-B6-A0IA-01A	tumor	-0.0785553
BRCA	TCGA-B6-A0IB-01A	tumor	-0.0683545
BRCA	TCGA-B6-A0IC-01A	tumor	0.114128
BRCA	TCGA-B6-A0IE-01A	tumor	0.00567593
BRCA	TCGA-B6-A0IG-01A	tumor	0.220314
BRCA	TCGA-B6-A0IH-01A	tumor	0.116278
BRCA	TCGA-B6-A0IJ-01A	tumor	0.20539
BRCA	TCGA-B6-A0IK-01A	tumor	-0.0416078
BRCA	TCGA-B6-A0IM-01A	tumor	0.19788
BRCA	TCGA-B6-A0IN-01A	tumor	0.181744
BRCA	TCGA-B6-A0IO-01A	tumor	0.224528
BRCA	TCGA-B6-A0IP-01A	tumor	0.277191
BRCA	TCGA-B6-A0IQ-01A	tumor	-0.0942831
BRCA	TCGA-B6-A0RE-01A	tumor	-0.00739493
BRCA	TCGA-B6-A0RG-01A	tumor	0.123519
BRCA	TCGA-B6-A0RH-01A	tumor	0.224758
BRCA	TCGA-B6-A0RI-01A	tumor	0.209618
BRCA	TCGA-B6-A0RL-01A	tumor	0.102056
BRCA	TCGA-B6-A0RM-01A	tumor	-0.112354
BRCA	TCGA-B6-A0RN-01A	tumor	0.0649737
BRCA	TCGA-B6-A0RO-01A	tumor	0.0328164
BRCA	TCGA-B6-A0RP-01A	tumor	0.141211
BRCA	TCGA-B6-A0RQ-01A	tumor	0.0792391
BRCA	TCGA-B6-A0RS-01A	tumor	0.118357
BRCA	TCGA-B6-A0RT-01A	tumor	0.377396
BRCA	TCGA-B6-A0RU-01A	tumor	-0.0877044
BRCA	TCGA-B6-A0RV-01A	tumor	0.132595
BRCA	TCGA-B6-A0WS-01A	tumor	0.194769
BRCA	TCGA-B6-A0WT-01A	tumor	0.0938607
BRCA	TCGA-B6-A0WV-01A	tumor	0.132126
BRCA	TCGA-B6-A0WW-01A	tumor	0.298484
BRCA	TCGA-B6-A0WX-01A	tumor	0.00651077
BRCA	TCGA-B6-A0WY-01A	tumor	0.207822
BRCA	TCGA-B6-A0WZ-01A	tumor	0.0632954
BRCA	TCGA-B6-A0X0-01A	tumor	0.141732
BRCA	TCGA-B6-A0X1-01A	tumor	0.589817
BRCA	TCGA-B6-A0X4-01A	tumor	-0.0441906
BRCA	TCGA-B6-A0X5-01A	tumor	-0.201233
BRCA	TCGA-B6-A0X7-01A	tumor	0.0871283
BRCA	TCGA-B6-A1KC-01B	tumor	-0.106162
BRCA	TCGA-B6-A1KF-01A	tumor	-0.0594794
BRCA	TCGA-B6-A1KI-01A	tumor	0.170503
BRCA	TCGA-B6-A1KN-01A	tumor	0.0865813
BRCA	TCGA-B6-A2IU-01A	tumor	-0.0181601
BRCA	TCGA-B6-A3ZX-01A	tumor	0.146012
BRCA	TCGA-B6-A400-01A	tumor	0.0445981
BRCA	TCGA-B6-A401-01A	tumor	-0.103477
BRCA	TCGA-B6-A402-01A	tumor	-0.0471512
BRCA	TCGA-B6-A408-01A	tumor	0.159207
BRCA	TCGA-B6-A409-01A	tumor	0.221716
BRCA	TCGA-B6-A40B-01A	tumor	0.246028
BRCA	TCGA-B6-A40C-01A	tumor	0.247813
BRCA	TCGA-BH-A0AU-01A	tumor	0.0451273
BRCA	TCGA-BH-A0AU-11A	normal	0.0525385
BRCA	TCGA-BH-A0AV-01A	tumor	0.146043
BRCA	TCGA-BH-A0AW-01A	tumor	0.114145
BRCA	TCGA-BH-A0AY-01A	tumor	0.0924322
BRCA	TCGA-BH-A0AY-11A	normal	0.127484
BRCA	TCGA-BH-A0AZ-01A	tumor	0.144768
BRCA	TCGA-BH-A0AZ-11A	normal	-0.0327698
BRCA	TCGA-BH-A0B0-01A	tumor	0.145577
BRCA	TCGA-BH-A0B1-01A	tumor	0.156144
BRCA	TCGA-BH-A0B2-01A	tumor	0.311288
BRCA	TCGA-BH-A0B2-11A	normal	0.0941747
BRCA	TCGA-BH-A0B3-01A	tumor	0.296958
BRCA	TCGA-BH-A0B3-11B	normal	0.226031
BRCA	TCGA-BH-A0B4-01A	tumor	0.0968868
BRCA	TCGA-BH-A0B5-01A	tumor	0.105745
BRCA	TCGA-BH-A0B5-11A	normal	0.160377
BRCA	TCGA-BH-A0B6-01A	tumor	0.443682
BRCA	TCGA-BH-A0B7-01A	tumor	0.0453196
BRCA	TCGA-BH-A0B7-11A	normal	0.110407
BRCA	TCGA-BH-A0B8-01A	tumor	0.0396556
BRCA	TCGA-BH-A0B8-11A	normal	0.164411
BRCA	TCGA-BH-A0B9-01A	tumor	0.321142
BRCA	TCGA-BH-A0BA-01A	tumor	-0.0519164
BRCA	TCGA-BH-A0BA-11A	normal	0.0856302
BRCA	TCGA-BH-A0BC-01A	tumor	0.197439
BRCA	TCGA-BH-A0BC-11A	normal	0.141235
BRCA	TCGA-BH-A0BD-01A	tumor	0.46348
BRCA	TCGA-BH-A0BF-01A	tumor	0.290711
BRCA	TCGA-BH-A0BG-01A	tumor	0.41108
BRCA	TCGA-BH-A0BJ-01A	tumor	0.139017
BRCA	TCGA-BH-A0BJ-11A	normal	0.167898
BRCA	TCGA-BH-A0BL-01A	tumor	0.156745
BRCA	TCGA-BH-A0BM-01A	tumor	0.102362
BRCA	TCGA-BH-A0BM-11A	normal	0.164873
BRCA	TCGA-BH-A0BO-01A	tumor	0.305644
BRCA	TCGA-BH-A0BP-01A	tumor	-0.0161655
BRCA	TCGA-BH-A0BQ-01A	tumor	0.274748
BRCA	TCGA-BH-A0BQ-11A	normal	0.114734
BRCA	TCGA-BH-A0BR-01A	tumor	0.180009
BRCA	TCGA-BH-A0BS-01A	tumor	0.254846
BRCA	TCGA-BH-A0BS-11A	normal	0.0583006
BRCA	TCGA-BH-A0BT-01A	tumor	0.259353
BRCA	TCGA-BH-A0BT-11A	normal	0.117307
BRCA	TCGA-BH-A0BV-01A	tumor	0.178127
BRCA	TCGA-BH-A0BV-11A	normal	0.0192826
BRCA	TCGA-BH-A0BW-01A	tumor	0.496339
BRCA	TCGA-BH-A0BW-11A	normal	0.212123
BRCA	TCGA-BH-A0BZ-01A	tumor	0.280604
BRCA	TCGA-BH-A0BZ-11A	normal	0.189267
BRCA	TCGA-BH-A0C0-01A	tumor	0.228481
BRCA	TCGA-BH-A0C0-11A	normal	0.090279
BRCA	TCGA-BH-A0C1-01B	tumor	0.16118
BRCA	TCGA-BH-A0C3-01A	tumor	0.341981
BRCA	TCGA-BH-A0C3-11A	normal	0.0460013
BRCA	TCGA-BH-A0C7-01B	tumor	0.174528
BRCA	TCGA-BH-A0DD-01A	tumor	0.206044
BRCA	TCGA-BH-A0DD-11A	normal	0.21362
BRCA	TCGA-BH-A0DE-01A	tumor	0.160542
BRCA	TCGA-BH-A0DG-01A	tumor	0.111301
BRCA	TCGA-BH-A0DG-11A	normal	0.0909566
BRCA	TCGA-BH-A0DH-01A	tumor	0.116934
BRCA	TCGA-BH-A0DH-11A	normal	0.0988133
BRCA	TCGA-BH-A0DI-01A	tumor	0.0871893
BRCA	TCGA-BH-A0DK-01A	tumor	0.223983
BRCA	TCGA-BH-A0DK-11A	normal	-0.0501101
BRCA	TCGA-BH-A0DL-01A	tumor	0.385256
BRCA	TCGA-BH-A0DL-11A	normal	0.230878
BRCA	TCGA-BH-A0DO-01B	tumor	-0.0181461
BRCA	TCGA-BH-A0DO-11A	normal	0.105228
BRCA	TCGA-BH-A0DP-01A	tumor	0.0554036
BRCA	TCGA-BH-A0DP-11A	normal	0.0294266
BRCA	TCGA-BH-A0DQ-01A	tumor	0.163101
BRCA	TCGA-BH-A0DQ-11A	normal	0.0284707
BRCA	TCGA-BH-A0DS-01A	tumor	0.1337
BRCA	TCGA-BH-A0DT-01A	tumor	0.227415
BRCA	TCGA-BH-A0DT-11A	normal	0.0416601
BRCA	TCGA-BH-A0DV-01A	tumor	0.159049
BRCA	TCGA-BH-A0DV-11A	normal	0.0805493
BRCA	TCGA-BH-A0DX-01A	tumor	0.0725298
BRCA	TCGA-BH-A0DZ-01A	tumor	0.450174
BRCA	TCGA-BH-A0DZ-11A	normal	0.072637
BRCA	TCGA-BH-A0E0-01A	tumor	-0.166175
BRCA	TCGA-BH-A0E0-11A	normal	0.0614856
BRCA	TCGA-BH-A0E1-01A	tumor	0.103454
BRCA	TCGA-BH-A0E1-11A	normal	0.0624449
BRCA	TCGA-BH-A0E2-01A	tumor	0.0503477
BRCA	TCGA-BH-A0E6-01A	tumor	0.0968219
BRCA	TCGA-BH-A0E7-01A	tumor	0.127811
BRCA	TCGA-BH-A0E9-01B	tumor	-0.0705869
BRCA	TCGA-BH-A0EA-01A	tumor	0.0385789
BRCA	TCGA-BH-A0EB-01A	tumor	0.282814
BRCA	TCGA-BH-A0EE-01A	tumor	0.294689
BRCA	TCGA-BH-A0EI-01A	tumor	0.0354215
BRCA	TCGA-BH-A0GY-01A	tumor	0.0524989
BRCA	TCGA-BH-A0GZ-01A	tumor	0.0263029
BRCA	TCGA-BH-A0H0-01A	tumor	-0.00843795
BRCA	TCGA-BH-A0H3-01A	tumor	0.246017
BRCA	TCGA-BH-A0H5-01A	tumor	0.353542
BRCA	TCGA-BH-A0H5-11A	normal	-0.0157619
BRCA	TCGA-BH-A0H6-01A	tumor	0.0973782
BRCA	TCGA-BH-A0H7-01A	tumor	0.129728
BRCA	TCGA-BH-A0H7-11A	normal	0.043543
BRCA	TCGA-BH-A0H9-01A	tumor	0.00452654
BRCA	TCGA-BH-A0H9-11A	normal	0.163223
BRCA	TCGA-BH-A0HA-01A	tumor	0.268523
BRCA	TCGA-BH-A0HA-11A	normal	0.0460619
BRCA	TCGA-BH-A0HB-01A	tumor	0.104283
BRCA	TCGA-BH-A0HF-01A	tumor	0.113331
BRCA	TCGA-BH-A0HI-01A	tumor	0.149301
BRCA	TCGA-BH-A0HK-01A	tumor	0.0582894
BRCA	TCGA-BH-A0HK-11A	normal	0.114491
BRCA	TCGA-BH-A0HL-01A	tumor	-0.2159
BRCA	TCGA-BH-A0HN-01A	tumor	-0.0985698
BRCA	TCGA-BH-A0HO-01A	tumor	0.125341
BRCA	TCGA-BH-A0HP-01A	tumor	0.171178
BRCA	TCGA-BH-A0HQ-01A	tumor	0.0842864
BRCA	TCGA-BH-A0HU-01A	tumor	0.197775
BRCA	TCGA-BH-A0HW-01A	tumor	-0.103683
BRCA	TCGA-BH-A0HX-01A	tumor	0.0576974
BRCA	TCGA-BH-A0HY-01A	tumor	0.155959
BRCA	TCGA-BH-A0RX-01A	tumor	0.32817
BRCA	TCGA-BH-A0W3-01A	tumor	0.141172
BRCA	TCGA-BH-A0W4-01A	tumor	-0.00788865
BRCA	TCGA-BH-A0W5-01A	tumor	0.12487
BRCA	TCGA-BH-A0W7-01A	tumor	0.201276
BRCA	TCGA-BH-A0WA-01A	tumor	0.141528
BRCA	TCGA-BH-A18F-01A	tumor	0.0684701
BRCA	TCGA-BH-A18G-01A	tumor	0.244414
BRCA	TCGA-BH-A18H-01A	tumor	0.307146
BRCA	TCGA-BH-A18I-01A	tumor	0.33112
BRCA	TCGA-BH-A18J-01A	tumor	0.0416075
BRCA	TCGA-BH-A18J-11A	normal	0.103197
BRCA	TCGA-BH-A18K-01A	tumor	0.0808347
BRCA	TCGA-BH-A18K-11A	normal	0.0151378
BRCA	TCGA-BH-A18L-01A	tumor	0.243424
BRCA	TCGA-BH-A18L-11A	normal	0.153981
BRCA	TCGA-BH-A18M-01A	tumor	0.127635
BRCA	TCGA-BH-A18M-11A	normal	0.180673
BRCA	TCGA-BH-A18N-01A	tumor	0.0800393
BRCA	TCGA-BH-A18N-11A	normal	0.0994326
BRCA	TCGA-BH-A18P-01A	tumor	0.0560765
BRCA	TCGA-BH-A18P-11A	normal	0.0740359
BRCA	TCGA-BH-A18Q-01A	tumor	0.111563
BRCA	TCGA-BH-A18Q-11A	normal	0.121648
BRCA	TCGA-BH-A18R-01A	tumor	0.278195
BRCA	TCGA-BH-A18R-11A	normal	0.0880799
BRCA	TCGA-BH-A18S-01A	tumor	0.124131
BRCA	TCGA-BH-A18S-11A	normal	0.167885
BRCA	TCGA-BH-A18T-01A	tumor	0.343112
BRCA	TCGA-BH-A18U-01A	tumor	-0.0584332
BRCA	TCGA-BH-A18U-11A	normal	0.0921782
BRCA	TCGA-BH-A18V-01A	tumor	0.258511
BRCA	TCGA-BH-A18V-06A	tumor	0.415495
BRCA	TCGA-BH-A18V-11A	normal	0.0302789
BRCA	TCGA-BH-A1EN-01A	tumor	0.0214202
BRCA	TCGA-BH-A1EN-11A	normal	0.220117
BRCA	TCGA-BH-A1EO-01A	tumor	0.164821
BRCA	TCGA-BH-A1EO-11A	normal	0.360484
BRCA	TCGA-BH-A1ES-01A	tumor	0.0290908
BRCA	TCGA-BH-A1ES-06A	tumor	-0.125343
BRCA	TCGA-BH-A1ET-01A	tumor	0.251809
BRCA	TCGA-BH-A1ET-11B	normal	0.18854
BRCA	TCGA-BH-A1EU-01A	tumor	0.206467
BRCA	TCGA-BH-A1EU-11A	normal	0.163483
BRCA	TCGA-BH-A1EV-01A	tumor	-0.0932501
BRCA	TCGA-BH-A1EV-11A	normal	0.178079
BRCA	TCGA-BH-A1EW-01A	tumor	0.274438
BRCA	TCGA-BH-A1EW-11B	normal	0.137356
BRCA	TCGA-BH-A1EX-01A	tumor	0.18096
BRCA	TCGA-BH-A1EY-01A	tumor	-0.0252737
BRCA	TCGA-BH-A1F0-01A	tumor	0.416535
BRCA	TCGA-BH-A1F0-11B	normal	0.164033
BRCA	TCGA-BH-A1F2-01A	tumor	0.0273816
BRCA	TCGA-BH-A1F2-11A	normal	0.109468
BRCA	TCGA-BH-A1F5-01A	tumor	0.0744595
BRCA	TCGA-BH-A1F6-01A	tumor	0.135435
BRCA	TCGA-BH-A1F6-11B	normal	0.238709
BRCA	TCGA-BH-A1F8-01A	tumor	0.27669
BRCA	TCGA-BH-A1F8-11B	normal	0.192685
BRCA	TCGA-BH-A1FB-01A	tumor	0.217282
BRCA	TCGA-BH-A1FB-11A	normal	0.108533
BRCA	TCGA-BH-A1FC-01A	tumor	0.2605
BRCA	TCGA-BH-A1FC-11A	normal	0.263215
BRCA	TCGA-BH-A1FD-01A	tumor	0.127464
BRCA	TCGA-BH-A1FD-11B	normal	0.154087
BRCA	TCGA-BH-A1FE-01A	tumor	0.1709
BRCA	TCGA-BH-A1FE-06A	tumor	0.0443649
BRCA	TCGA-BH-A1FE-11B	normal	0.234096
BRCA	TCGA-BH-A1FG-01A	tumor	0.205773
BRCA	TCGA-BH-A1FG-11B	normal	0.201736
BRCA	TCGA-BH-A1FH-01A	tumor	0.11599
BRCA	TCGA-BH-A1FH-11B	normal	0.187989
BRCA	TCGA-BH-A1FJ-01A	tumor	0.115621
BRCA	TCGA-BH-A1FJ-11B	normal	0.243137
BRCA	TCGA-BH-A1FL-01A	tumor	0.141294
BRCA	TCGA-BH-A1FM-01A	tumor	0.198446
BRCA	TCGA-BH-A1FM-11B	normal	0.175523
BRCA	TCGA-BH-A1FN-01A	tumor	0.0464797
BRCA	TCGA-BH-A1FN-11A	normal	0.324035
BRCA	TCGA-BH-A1FR-01A	tumor	-0.0474246
BRCA	TCGA-BH-A1FR-11B	normal	0.113139
BRCA	TCGA-BH-A1FU-01A	tumor	0.122607
BRCA	TCGA-BH-A1FU-11A	normal	0.0771309
BRCA	TCGA-BH-A201-01A	tumor	0.0523809
BRCA	TCGA-BH-A202-01A	tumor	0.0926475
BRCA	TCGA-BH-A203-01A	tumor	0.0804147
BRCA	TCGA-BH-A203-11A	normal	0.11877
BRCA	TCGA-BH-A204-01A	tumor	-0.150096
BRCA	TCGA-BH-A204-11A	normal	0.20711
BRCA	TCGA-BH-A208-01A	tumor	0.0902387
BRCA	TCGA-BH-A208-11A	normal	0.0825368
BRCA	TCGA-BH-A209-01A	tumor	0.439356
BRCA	TCGA-BH-A209-11A	normal	0.340577
BRCA	TCGA-BH-A28O-01A	tumor	0.00885895
BRCA	TCGA-BH-A28Q-01A	tumor	0.10299
BRCA	TCGA-BH-A2L8-01A	tumor	0.0511218
BRCA	TCGA-BH-A42T-01A	tumor	0.265094
BRCA	TCGA-BH-A42U-01A	tumor	0.0650619
BRCA	TCGA-BH-A42V-01A	tumor	0.00813338
BRCA	TCGA-BH-A5IZ-01A	tumor	-0.0261232
BRCA	TCGA-BH-A5J0-01A	tumor	0.150066
BRCA	TCGA-BH-A6R8-01A	tumor	0.268667
BRCA	TCGA-BH-A6R9-01A	tumor	0.385677
BRCA	TCGA-BH-A8FY-01A	tumor	0.0914888
BRCA	TCGA-BH-A8FZ-01A	tumor	0.06571
BRCA	TCGA-BH-A8G0-01A	tumor	0.09353
BRCA	TCGA-BH-AB28-01A	tumor	0.180984
BRCA	TCGA-C8-A12K-01A	tumor	0.523015
BRCA	TCGA-C8-A12L-01A	tumor	0.217973
BRCA	TCGA-C8-A12M-01A	tumor	-0.00581882
BRCA	TCGA-C8-A12N-01A	tumor	0.188309
BRCA	TCGA-C8-A12O-01A	tumor	0.229297
BRCA	TCGA-C8-A12P-01A	tumor	0.105504
BRCA	TCGA-C8-A12Q-01A	tumor	0.137126
BRCA	TCGA-C8-A12T-01A	tumor	0.0749224
BRCA	TCGA-C8-A12U-01A	tumor	0.0350087
BRCA	TCGA-C8-A12V-01A	tumor	0.569391
BRCA	TCGA-C8-A12W-01A	tumor	0.0650659
BRCA	TCGA-C8-A12X-01A	tumor	0.0973781
BRCA	TCGA-C8-A12Y-01A	tumor	0.347148
BRCA	TCGA-C8-A12Z-01A	tumor	0.00887367
BRCA	TCGA-C8-A130-01A	tumor	0.05965
BRCA	TCGA-C8-A131-01A	tumor	0.169445
BRCA	TCGA-C8-A132-01A	tumor	0.0819398
BRCA	TCGA-C8-A133-01A	tumor	0.071254
BRCA	TCGA-C8-A134-01A	tumor	0.178801
BRCA	TCGA-C8-A135-01A	tumor	0.0939426
BRCA	TCGA-C8-A137-01A	tumor	-0.0445495
BRCA	TCGA-C8-A138-01A	tumor	0.315303
BRCA	TCGA-C8-A1HE-01A	tumor	0.0944525
BRCA	TCGA-C8-A1HF-01A	tumor	0.213419
BRCA	TCGA-C8-A1HG-01A	tumor	0.0778753
BRCA	TCGA-C8-A1HI-01A	tumor	0.145043
BRCA	TCGA-C8-A1HJ-01A	tumor	-0.128664
BRCA	TCGA-C8-A1HK-01A	tumor	0.0962419
BRCA	TCGA-C8-A1HL-01A	tumor	0.0322965
BRCA	TCGA-C8-A1HM-01A	tumor	0.528041
BRCA	TCGA-C8-A1HN-01A	tumor	-0.0276963
BRCA	TCGA-C8-A1HO-01A	tumor	0.0928244
BRCA	TCGA-C8-A26V-01A	tumor	0.227298
BRCA	TCGA-C8-A26W-01A	tumor	0.371537
BRCA	TCGA-C8-A26X-01A	tumor	0.252564
BRCA	TCGA-C8-A26Y-01A	tumor	-0.00386668
BRCA	TCGA-C8-A26Z-01A	tumor	0.186185
BRCA	TCGA-C8-A273-01A	tumor	0.166969
BRCA	TCGA-C8-A274-01A	tumor	-0.102643
BRCA	TCGA-C8-A275-01A	tumor	0.150888
BRCA	TCGA-C8-A278-01A	tumor	0.211322
BRCA	TCGA-C8-A27A-01A	tumor	-0.0789679
BRCA	TCGA-C8-A27B-01A	tumor	0.320484
BRCA	TCGA-C8-A3M7-01A	tumor	0.0673546
BRCA	TCGA-C8-A3M8-01A	tumor	0.020302
BRCA	TCGA-C8-A8HP-01A	tumor	0.0882396
BRCA	TCGA-C8-A8HQ-01A	tumor	0.197492
BRCA	TCGA-C8-A8HR-01A	tumor	0.149717
BRCA	TCGA-D8-A13Y-01A	tumor	-0.167709
BRCA	TCGA-D8-A13Z-01A	tumor	0.0832493
BRCA	TCGA-D8-A140-01A	tumor	0.106355
BRCA	TCGA-D8-A141-01A	tumor	0.323201
BRCA	TCGA-D8-A142-01A	tumor	-0.0207602
BRCA	TCGA-D8-A143-01A	tumor	0.0386023
BRCA	TCGA-D8-A145-01A	tumor	0.0147906
BRCA	TCGA-D8-A146-01A	tumor	0.125739
BRCA	TCGA-D8-A147-01A	tumor	0.119741
BRCA	TCGA-D8-A1J8-01A	tumor	0.266114
BRCA	TCGA-D8-A1J9-01A	tumor	0.121796
BRCA	TCGA-D8-A1JA-01A	tumor	0.158212
BRCA	TCGA-D8-A1JB-01A	tumor	0.273499
BRCA	TCGA-D8-A1JC-01A	tumor	0.258749
BRCA	TCGA-D8-A1JD-01A	tumor	0.116917
BRCA	TCGA-D8-A1JE-01A	tumor	0.0422179
BRCA	TCGA-D8-A1JF-01A	tumor	0.11988
BRCA	TCGA-D8-A1JG-01B	tumor	0.263739
BRCA	TCGA-D8-A1JH-01A	tumor	0.173887
BRCA	TCGA-D8-A1JI-01A	tumor	-0.00399696
BRCA	TCGA-D8-A1JJ-01A	tumor	0.0877655
BRCA	TCGA-D8-A1JK-01A	tumor	0.320274
BRCA	TCGA-D8-A1JL-01A	tumor	0.339803
BRCA	TCGA-D8-A1JM-01A	tumor	0.241765
BRCA	TCGA-D8-A1JN-01A	tumor	0.0958115
BRCA	TCGA-D8-A1JP-01A	tumor	0.0843088
BRCA	TCGA-D8-A1JS-01A	tumor	0.0529681
BRCA	TCGA-D8-A1JT-01A	tumor	0.219921
BRCA	TCGA-D8-A1JU-01A	tumor	0.231167
BRCA	TCGA-D8-A1X5-01A	tumor	0.187157
BRCA	TCGA-D8-A1X6-01A	tumor	0.0781984
BRCA	TCGA-D8-A1X7-01A	tumor	-0.0302353
BRCA	TCGA-D8-A1X8-01A	tumor	0.215295
BRCA	TCGA-D8-A1X9-01A	tumor	0.23351
BRCA	TCGA-D8-A1XA-01A	tumor	0.130738
BRCA	TCGA-D8-A1XB-01A	tumor	0.0376852
BRCA	TCGA-D8-A1XC-01A	tumor	-0.0625839
BRCA	TCGA-D8-A1XD-01A	tumor	-0.154524
BRCA	TCGA-D8-A1XF-01A	tumor	0.248236
BRCA	TCGA-D8-A1XG-01A	tumor	0.0692921
BRCA	TCGA-D8-A1XJ-01A	tumor	-0.0393374
BRCA	TCGA-D8-A1XK-01A	tumor	0.0415505
BRCA	TCGA-D8-A1XL-01A	tumor	0.297478
BRCA	TCGA-D8-A1XM-01A	tumor	0.207377
BRCA	TCGA-D8-A1XO-01A	tumor	0.141673
BRCA	TCGA-D8-A1XQ-01A	tumor	0.250465
BRCA	TCGA-D8-A1XR-01A	tumor	0.0284616
BRCA	TCGA-D8-A1XS-01A	tumor	0.0462415
BRCA	TCGA-D8-A1XT-01A	tumor	0.257569
BRCA	TCGA-D8-A1XU-01A	tumor	0.196655
BRCA	TCGA-D8-A1XV-01A	tumor	0.0844462
BRCA	TCGA-D8-A1XW-01A	tumor	0.066729
BRCA	TCGA-D8-A1XY-01A	tumor	0.113037
BRCA	TCGA-D8-A1XZ-01A	tumor	0.038234
BRCA	TCGA-D8-A1Y0-01A	tumor	0.227457
BRCA	TCGA-D8-A1Y1-01A	tumor	0.119402
BRCA	TCGA-D8-A1Y2-01A	tumor	0.265064
BRCA	TCGA-D8-A1Y3-01A	tumor	0.35393
BRCA	TCGA-D8-A27E-01A	tumor	-0.0396309
BRCA	TCGA-D8-A27F-01A	tumor	0.0276545
BRCA	TCGA-D8-A27G-01A	tumor	0.273553
BRCA	TCGA-D8-A27H-01A	tumor	-0.0597835
BRCA	TCGA-D8-A27I-01A	tumor	0.16494
BRCA	TCGA-D8-A27K-01A	tumor	0.162903
BRCA	TCGA-D8-A27L-01A	tumor	0.0814053
BRCA	TCGA-D8-A27M-01A	tumor	0.310505
BRCA	TCGA-D8-A27N-01A	tumor	0.223497
BRCA	TCGA-D8-A27P-01A	tumor	-0.00905149
BRCA	TCGA-D8-A27R-01A	tumor	0.159986
BRCA	TCGA-D8-A27T-01A	tumor	0.202143
BRCA	TCGA-D8-A27V-01A	tumor	0.155946
BRCA	TCGA-D8-A27W-01A	tumor	-0.031773
BRCA	TCGA-D8-A3Z5-01A	tumor	0.0935307
BRCA	TCGA-D8-A3Z6-01A	tumor	0.0790225
BRCA	TCGA-D8-A4Z1-01A	tumor	0.0267725
BRCA	TCGA-D8-A73U-01A	tumor	0.406953
BRCA	TCGA-D8-A73W-01A	tumor	0.247898
BRCA	TCGA-D8-A73X-01A	tumor	0.0196304
BRCA	TCGA-E2-A105-01A	tumor	-0.0429129
BRCA	TCGA-E2-A106-01A	tumor	0.0142541
BRCA	TCGA-E2-A107-01A	tumor	0.0163164
BRCA	TCGA-E2-A108-01A	tumor	0.331697
BRCA	TCGA-E2-A109-01A	tumor	0.116069
BRCA	TCGA-E2-A10A-01A	tumor	0.217093
BRCA	TCGA-E2-A10B-01A	tumor	0.0612773
BRCA	TCGA-E2-A10C-01A	tumor	-0.0194845
BRCA	TCGA-E2-A10E-01A	tumor	0.0440578
BRCA	TCGA-E2-A10F-01A	tumor	0.318801
BRCA	TCGA-E2-A14N-01A	tumor	0.246328
BRCA	TCGA-E2-A14O-01A	tumor	0.349657
BRCA	TCGA-E2-A14P-01A	tumor	-0.051284
BRCA	TCGA-E2-A14Q-01A	tumor	0.0595551
BRCA	TCGA-E2-A14R-01A	tumor	0.0663136
BRCA	TCGA-E2-A14S-01A	tumor	0.143923
BRCA	TCGA-E2-A14T-01A	tumor	-0.0426684
BRCA	TCGA-E2-A14U-01A	tumor	-0.0557044
BRCA	TCGA-E2-A14V-01A	tumor	0.137681
BRCA	TCGA-E2-A14W-01A	tumor	0.0517667
BRCA	TCGA-E2-A14X-01A	tumor	0.159139
BRCA	TCGA-E2-A14Y-01A	tumor	-0.0672056
BRCA	TCGA-E2-A14Z-01A	tumor	0.207184
BRCA	TCGA-E2-A150-01A	tumor	0.345142
BRCA	TCGA-E2-A152-01A	tumor	-0.00604928
BRCA	TCGA-E2-A153-01A	tumor	0.117531
BRCA	TCGA-E2-A153-11A	normal	0.0114551
BRCA	TCGA-E2-A154-01A	tumor	0.093287
BRCA	TCGA-E2-A155-01A	tumor	-0.0773729
BRCA	TCGA-E2-A156-01A	tumor	0.0510649
BRCA	TCGA-E2-A158-01A	tumor	-0.399237
BRCA	TCGA-E2-A158-11A	normal	0.0657725
BRCA	TCGA-E2-A159-01A	tumor	0.155549
BRCA	TCGA-E2-A15A-01A	tumor	0.290305
BRCA	TCGA-E2-A15A-06A	tumor	0.345793
BRCA	TCGA-E2-A15C-01A	tumor	0.0105766
BRCA	TCGA-E2-A15D-01A	tumor	0.066799
BRCA	TCGA-E2-A15E-01A	tumor	0.0317019
BRCA	TCGA-E2-A15E-06A	tumor	0.238842
BRCA	TCGA-E2-A15F-01A	tumor	0.0596444
BRCA	TCGA-E2-A15G-01A	tumor	0.0799193
BRCA	TCGA-E2-A15H-01A	tumor	0.219103
BRCA	TCGA-E2-A15I-01A	tumor	0.0990189
BRCA	TCGA-E2-A15I-11A	normal	0.145578
BRCA	TCGA-E2-A15J-01A	tumor	0.0970556
BRCA	TCGA-E2-A15K-01A	tumor	0.287398
BRCA	TCGA-E2-A15K-06A	tumor	0.129253
BRCA	TCGA-E2-A15K-11A	normal	0.287327
BRCA	TCGA-E2-A15L-01A	tumor	-0.0965754
BRCA	TCGA-E2-A15M-01A	tumor	0.367559
BRCA	TCGA-E2-A15M-11A	normal	0.124134
BRCA	TCGA-E2-A15O-01A	tumor	-0.222131
BRCA	TCGA-E2-A15P-01A	tumor	0.198194
BRCA	TCGA-E2-A15R-01A	tumor	-0.040099
BRCA	TCGA-E2-A15S-01A	tumor	-0.157248
BRCA	TCGA-E2-A15T-01A	tumor	-0.197881
BRCA	TCGA-E2-A1AZ-01A	tumor	0.331229
BRCA	TCGA-E2-A1B0-01A	tumor	0.145951
BRCA	TCGA-E2-A1B1-01A	tumor	0.369735
BRCA	TCGA-E2-A1B4-01A	tumor	0.0776195
BRCA	TCGA-E2-A1B5-01A	tumor	0.243304
BRCA	TCGA-E2-A1B6-01A	tumor	0.168957
BRCA	TCGA-E2-A1BC-01A	tumor	0.189239
BRCA	TCGA-E2-A1BC-11A	normal	0.0528779
BRCA	TCGA-E2-A1BD-01A	tumor	-0.0416976
BRCA	TCGA-E2-A1IE-01A	tumor	-0.0655408
BRCA	TCGA-E2-A1IF-01A	tumor	-0.00690924
BRCA	TCGA-E2-A1IG-01A	tumor	0.106441
BRCA	TCGA-E2-A1IG-11A	normal	0.0797869
BRCA	TCGA-E2-A1IH-01A	tumor	0.246525
BRCA	TCGA-E2-A1II-01A	tumor	0.419222
BRCA	TCGA-E2-A1IJ-01A	tumor	0.271188
BRCA	TCGA-E2-A1IK-01A	tumor	0.0793496
BRCA	TCGA-E2-A1IL-01A	tumor	0.166086
BRCA	TCGA-E2-A1IN-01A	tumor	0.0679375
BRCA	TCGA-E2-A1IO-01A	tumor	0.0768247
BRCA	TCGA-E2-A1IP-01A	tumor	0.310818
BRCA	TCGA-E2-A1IU-01A	tumor	0.105678
BRCA	TCGA-E2-A1L6-01A	tumor	0.0410836
BRCA	TCGA-E2-A1L7-01A	tumor	-0.020772
BRCA	TCGA-E2-A1L7-11A	normal	0.138145
BRCA	TCGA-E2-A1L8-01A	tumor	0.0919127
BRCA	TCGA-E2-A1L9-01A	tumor	0.281789
BRCA	TCGA-E2-A1LA-01A	tumor	0.136616
BRCA	TCGA-E2-A1LB-01A	tumor	0.153978
BRCA	TCGA-E2-A1LB-11A	normal	0.0671156
BRCA	TCGA-E2-A1LE-01A	tumor	0.141062
BRCA	TCGA-E2-A1LG-01A	tumor	0.148261
BRCA	TCGA-E2-A1LH-01A	tumor	0.185865
BRCA	TCGA-E2-A1LH-11A	normal	0.0786936
BRCA	TCGA-E2-A1LI-01A	tumor	0.312683
BRCA	TCGA-E2-A1LK-01A	tumor	-0.0368369
BRCA	TCGA-E2-A1LL-01A	tumor	0.110393
BRCA	TCGA-E2-A1LS-01A	tumor	0.24813
BRCA	TCGA-E2-A1LS-11A	normal	0.174836
BRCA	TCGA-E2-A2P5-01A	tumor	0.000426778
BRCA	TCGA-E2-A2P6-01A	tumor	0.186449
BRCA	TCGA-E2-A3DX-01A	tumor	0.116634
BRCA	TCGA-E2-A56Z-01A	tumor	0.0679904
BRCA	TCGA-E2-A570-01A	tumor	0.0746115
[truncated: 18,939 more rows]
