# Supplementary material for: Multi-omics analysis reveals the panoramic picture of necroptosis-related regulators in pan-cancer
Source: Aging (Albany NY). 2022 Jun 21;14(12):5034–58. doi: 10.18632/aging.204124 (PMC9271292; doi:10.18632/aging.204124)
Supplement: Supplementary Material 10 [file aging-14-204124-s010.xlsx]

## Sheet: SheetName
cancertype	tumor_gsva	normal_gsva	log2fc	pval	diff_gsva
BLCA	0.137285	0.13078	0.070036	0.802165	0.00650537
BLCA	0.137285	0.13078	0.070036	0.802165	0.00650537
BRCA	0.130286	0.135786	-0.0596581	0.55312	-0.00550051
BRCA	0.130286	0.135786	-0.0596581	0.55312	-0.00550051
COAD	0.268714	0.550272	-1.03407	3.4614e-16	-0.281558
COAD	0.268714	0.550272	-1.03407	3.4614e-16	-0.281558
ESCA	0.241346	0.088799	1.44248	0.00990902	0.152547
ESCA	0.241346	0.088799	1.44248	0.00990902	0.152547
HNSC	0.285585	0.264335	0.111555	0.425162	0.0212504
HNSC	0.285585	0.264335	0.111555	0.425162	0.0212504
KICH	-0.166053	-0.0334068	2.31343	0.00168725	-0.132647
KICH	-0.166053	-0.0334068	2.31343	0.00168725	-0.132647
KIRC	0.423508	0.0497938	3.08835	4.12252e-50	0.373714
KIRC	0.423508	0.0497938	3.08835	4.12252e-50	0.373714
KIRP	0.24657	-0.0192255		2.78824e-16	0.265796
KIRP	0.24657	-0.0192255		2.78824e-16	0.265796
LIHC	0.100493	0.247095	-1.29797	2.45543e-11	-0.146602
LIHC	0.100493	0.247095	-1.29797	2.45543e-11	-0.146602
LUAD	0.224995	0.290204	-0.367174	1.24343e-07	-0.0652088
LUAD	0.224995	0.290204	-0.367174	1.24343e-07	-0.0652088
LUSC	0.0762964	0.294627	-1.9492	2.74136e-36	-0.21833
LUSC	0.0762964	0.294627	-1.9492	2.74136e-36	-0.21833
PRAD	-0.18515	-0.0543828	1.76747	6.90677e-09	-0.130767
PRAD	-0.18515	-0.0543828	1.76747	6.90677e-09	-0.130767
READ	0.40845	0.794244	-0.959422	0.000111748	-0.385793
READ	0.40845	0.794244	-0.959422	0.000111748	-0.385793
STAD	0.260882	0.295063	-0.177626	0.339546	-0.034181
STAD	0.260882	0.295063	-0.177626	0.339546	-0.034181
THCA	0.212474	0.124532	0.770769	2.3045e-05	0.087942
THCA	0.212474	0.124532	0.770769	2.3045e-05	0.087942
UCEC	0.110127	0.064997	0.760728	0.103182	0.0451304
UCEC	0.110127	0.064997	0.760728	0.103182	0.0451304
