# Supplementary material for: Multi-omics analysis reveals the panoramic picture of necroptosis-related regulators in pan-cancer
Source: Aging (Albany NY). 2022 Jun 21;14(12):5034–58. doi: 10.18632/aging.204124 (PMC9271292; doi:10.18632/aging.204124)
Supplement: Supplementary Material 11 [file aging-14-204124-s011.xlsx]

## Sheet: SheetName
cancertype	stage_type	diff_p	trend_score	StageI	StageII	StageIII	StageIV
ACC	pathologic_stage	0.0226858	-1.69842	0.21/9	0.069/37	-0.037/16	-0.062/15
BLCA	pathologic_stage	0.319146	-1.01905	0.14/2	0.15/130	0.13/140	0.11/134
BRCA	pathologic_stage	0.141702	-1.01905	0.14/182	0.11/626	0.13/252	0.1/20
CHOL	pathologic_stage	0.874673	0.339683	0.2/19	0.36/9	0.76/1	0.21/7
COAD	pathologic_stage	0.00321512	-1.69842	0.32/45	0.28/111	0.24/81	0.21/39
ESCA	pathologic_stage	0.587214	0	0.29/19	0.24/78	0.23/56	0.32/9
HNSC	pathologic_stage	1.523e-05	-1.69842	0.38/27	0.33/74	0.29/81	0.28/268
KICH	pathologic_stage	0.0129646	-0.339683	-0.035/21	-0.18/25	-0.24/14	-0.18/6
KIRC	pathologic_stage	0.561229	0	0.44/268	0.44/57	0.44/123	0.45/84
KIRP	pathologic_stage	0.0360676	-1.69842	0.27/172	0.27/22	0.22/52	0.18/15
LIHC	pathologic_stage	0.147435	-1.69842	0.13/173	0.1/87	0.068/85	0.024/5
LUAD	pathologic_stage	0.468945	1.01905	0.22/277	0.23/122	0.24/84	0.24/26
LUSC	pathologic_stage	0.316814	-0.339683	0.07/244	0.076/162	0.072/84	0.046/7
MESO	pathologic_stage	0.475759	-0.339683	0.37/10	0.35/16	0.34/45	0.37/16
PAAD	pathologic_stage	0.042342	0.339683	0.18/21	0.27/147	0.32/4	0.22/5
READ	pathologic_stage	0.186311	-1.69842	0.45/12	0.41/26	0.37/33	0.29/13
SKCM	pathologic_stage	0.0312358	0	0.13/78	0.058/140	0.097/171	0.11/24
STAD	pathologic_stage	0.670487	-1.01905	0.29/57	0.28/123	0.26/171	0.26/41
TGCT	pathologic_stage	0.0838286	0	-0.13/56	-0.051/12	-0.16/14
THCA	pathologic_stage	0.00123445	1.01905	0.21/288	0.12/51	0.24/111	0.24/57
UVM	pathologic_stage	0.558276	0		0.02/39	-0.0084/36	0.014/4
