# Supplementary material for: Multi-omics analysis reveals the panoramic picture of necroptosis-related regulators in pan-cancer
Source: Aging (Albany NY). 2022 Jun 21;14(12):5034–58. doi: 10.18632/aging.204124 (PMC9271292; doi:10.18632/aging.204124)
Supplement: Supplementary Material 12 [file aging-14-204124-s012.xlsx]

## Sheet: SheetName
cancertype	symbol	tumor	normal	fc	pval	fdr	n_tumor	entrez	n_normal
BLCA	FADD	610.274	470.639	1.29663	0.117454	0.24862	19	8772	19
BLCA	FAS	237.792	397.705	0.59801	0.00240254	0.0166842	19	355	19
BLCA	FASLG	12.2471	13.6137	0.900347	0.753066	0.82834	19	356	19
BLCA	MLKL	284.048	284.627	0.997968	0.990635	0.993718	19	197259	19
BLCA	RIPK1	865.176	1209.72	0.715213	0.000369671	0.00487237	19	8737	19
BLCA	RIPK3	246.547	225.216	1.09467	0.643365	0.742867	19	11035	19
BLCA	TLR3	123.889	225.427	0.549775	0.028809	0.0935021	19	7098	19
BLCA	TNF	23.4032	17.6155	1.32671	0.504573	0.628315	19	7124	19
BRCA	FADD	883.654	464.952	1.90033	3.72919e-09	1.47628e-08	114	8772	114
BRCA	FAS	325.282	444.987	0.731053	1.38541e-06	4.04014e-06	114	355	114
BRCA	FASLG	21.4061	14.1056	1.51392	0.0119024	0.0201359	114	356	114
BRCA	MLKL	205.032	215.779	0.950218	0.479464	0.538031	114	197259	114
BRCA	RIPK1	1115.9	1174.82	0.949848	0.0490514	0.073935	114	8737	114
BRCA	RIPK3	187.154	158.707	1.17913	0.0447373	0.0679803	114	11035	114
BRCA	TLR3	205.188	364.056	0.563736	2.18087e-15	1.89687e-14	114	7098	114
BRCA	TNF	38.5214	38.9443	0.989169	0.941297	0.951218	114	7124	114
COAD	FADD	684.999	650.551	1.05294	0.380599	0.46153	26	8772	26
COAD	FAS	328.86	780.073	0.421649	5.98601e-07	5.561e-06	26	355	26
COAD	FASLG	15.8695	22.4475	0.708259	0.141634	0.208854	26	356	26
COAD	MLKL	593.439	368.84	1.60877	2.9396e-05	0.000148187	26	197259	26
COAD	RIPK1	842.703	1309.26	0.643674	1.45468e-09	4.20436e-08	26	8737	26
COAD	RIPK3	478.893	786.231	0.609149	1.172e-05	6.7905e-05	26	11035	26
COAD	TLR3	163.883	507.549	0.323024	2.55034e-09	6.40342e-08	26	7098	26
COAD	TNF	27.3103	33.0167	0.827688	0.671575	0.734485	26	7124	26
ESCA	FADD	924.911	388.994	2.37735	0.0588452	0.208838	11	8772	11
ESCA	FAS	341.684	252.126	1.35507	0.193693	0.390998	11	355	11
ESCA	FASLG	10.7236	7.5756	1.41014	0.402826	0.573779	11	356	11
ESCA	MLKL	435.095	284.718	1.52798	0.00881655	0.0772213	11	197259	11
ESCA	RIPK1	1089.25	1262.95	0.862473	0.111441	0.290312	11	8737	11
ESCA	RIPK3	299.28	267.763	1.11766	0.717679	0.821605	11	11035	11
ESCA	TLR3	147.532	225.263	0.655088	0.0457341	0.183879	11	7098	11
ESCA	TNF	65.77	6.77123	9.58636	0.0445461	0.181555	11	7124	11
HNSC	FADD	1290.73	522.642	2.46934	0.000152648	0.000857165	43	8772	43
HNSC	FAS	414.105	492.832	0.840287	0.147756	0.234643	43	355	43
HNSC	FASLG	19.1482	16.2014	1.18077	0.598621	0.685339	43	356	43
HNSC	MLKL	336.661	316.314	1.0643	0.596275	0.683268	43	197259	43
HNSC	RIPK1	1080.5	1085.91	0.995019	0.918568	0.940914	43	8737	43
HNSC	RIPK3	181.762	291.308	0.624081	3.3086e-05	0.000237976	43	11035	43
HNSC	TLR3	152.318	320.954	0.474745	2.80504e-06	3.0379e-05	43	7098	43
HNSC	TNF	78.2643	67.2972	1.16272	0.533719	0.627562	43	7124	43
KICH	FADD	435.881	499.367	0.872893	0.0950404	0.146017	25	8772	25
KICH	FAS	155.842	295.825	0.526963	0.00217346	0.00560768	25	355	25
KICH	FASLG	7.81932	3.65959	2.10643	0.0041423	0.00980797	25	356	25
KICH	MLKL	101.27	142.328	0.711729	0.00924262	0.0197729	25	197259	25
KICH	RIPK1	650.889	838.844	0.775963	4.9612e-05	0.000221673	25	8737	25
KICH	RIPK3	51.3873	117.323	0.438479	2.27617e-07	2.36963e-06	25	11035	25
KICH	TLR3	155.93	390.247	0.399721	3.81256e-09	8.00189e-08	25	7098	25
KICH	TNF	7.76701	15.0395	0.519636	0.0629292	0.103158	25	7124	25
KIRC	FADD	647.475	475.752	1.36087	3.03154e-09	1.21103e-08	72	8772	72
KIRC	FAS	839.404	328.711	2.55315	4.84479e-17	6.28019e-16	72	355	72
KIRC	FASLG	60.1961	5.03722	11.7371	6.81975e-09	2.58292e-08	72	356	72
KIRC	MLKL	455.681	126.722	3.59385	3.85029e-32	6.70288e-30	72	197259	72
KIRC	RIPK1	1220.71	968.875	1.2599	4.41218e-13	3.07458e-12	72	8737	72
KIRC	RIPK3	78.3634	87.0425	0.900404	0.129136	0.171703	72	11035	72
KIRC	TLR3	2121.9	580.213	3.65666	8.51411e-17	1.05081e-15	72	7098	72
KIRC	TNF	16.2493	14.6032	1.11195	0.601789	0.654812	72	7124	72
KIRP	FADD	741.932	501.212	1.48018	7.10118e-08	1.31047e-06	32	8772	32
KIRP	FAS	707.191	274.962	2.57139	3.14459e-06	2.9908e-05	32	355	32
KIRP	FASLG	12.4605	4.50872	2.72538	0.00823598	0.0214894	32	356	32
KIRP	MLKL	289.906	113.052	2.56298	1.79891e-08	4.17698e-07	32	197259	32
KIRP	RIPK1	883.042	930.395	0.94911	0.356758	0.453822	32	8737	32
KIRP	RIPK3	60.9192	95.5682	0.637821	0.0458258	0.090224	32	11035	32
KIRP	TLR3	321.9	368.021	0.874715	0.22046	0.317652	32	7098	32
KIRP	TNF	22.9468	19.7989	1.15819	0.616638	0.694583	32	7124	32
LIHC	FADD	587.019	519.797	1.1293	0.0571805	0.105512	50	8772	50
LIHC	FAS	423.081	545.313	0.775891	0.060992	0.111183	50	355	50
LIHC	FASLG	14.3939	18.6682	0.772261	0.381594	0.466716	50	356	50
LIHC	MLKL	173.395	147.962	1.17177	0.162988	0.243852	50	197259	50
LIHC	RIPK1	1137.92	1228.96	0.925927	0.102444	0.169241	50	8737	50
LIHC	RIPK3	37.0789	49.6995	0.746573	0.320381	0.408228	50	11035	50
LIHC	TLR3	168.251	280.804	0.59932	0.00149377	0.00487104	50	7098	50
LIHC	TNF	7.5961	15.8088	0.483764	0.00635938	0.0168416	50	7124	50
LUAD	FADD	708.93	414.567	1.70988	7.21499e-13	1.03542e-11	58	8772	58
LUAD	FAS	676.464	743.725	0.909575	0.399748	0.462525	58	355	58
LUAD	FASLG	31.0599	29.6007	1.04913	0.781482	0.817979	58	356	58
LUAD	MLKL	367.875	411.483	0.894047	0.137659	0.188562	58	197259	58
LUAD	RIPK1	1080.87	1157.5	0.933806	0.0466208	0.0735219	58	8737	58
LUAD	RIPK3	277.982	307.065	0.905318	0.207531	0.267717	58	11035	58
LUAD	TLR3	255.991	364.384	0.702612	9.74535e-06	3.3711e-05	58	7098	58
LUAD	TNF	69.3303	60.8297	1.13951	0.756252	0.795484	58	7124	58
LUSC	FADD	860.074	403.493	2.13129	0.00341249	0.00638294	51	8772	51
LUSC	FAS	427.985	861.395	0.496909	3.60043e-09	1.8498e-08	51	355	51
LUSC	FASLG	23.0836	37.7573	0.612394	0.00844329	0.0146991	51	356	51
LUSC	MLKL	255.539	485.293	0.526664	8.56185e-09	4.12492e-08	51	197259	51
LUSC	RIPK1	880.114	1237.27	0.711358	7.65361e-10	4.39563e-09	51	8737	51
LUSC	RIPK3	148.578	324.972	0.457369	1.94956e-19	6.26222e-18	51	11035	51
LUSC	TLR3	120.401	387.59	0.310817	1.22125e-19	4.09478e-18	51	7098	51
LUSC	TNF	84.2361	78.7021	1.07023	0.848861	0.871567	51	7124	51
PRAD	FADD	361.732	398.26	0.908304	0.0407705	0.081271	52	8772	52
PRAD	FAS	274.798	421.275	0.652383	4.6898e-05	0.000256384	52	355	52
PRAD	FASLG	5.69525	6.88239	0.829982	0.286274	0.392145	52	356	52
PRAD	MLKL	95.7324	121.821	0.786023	0.00838938	0.0215003	52	197259	52
PRAD	RIPK1	840.202	873.205	0.96221	0.213253	0.309553	52	8737	52
PRAD	RIPK3	31.5939	69.6824	0.454181	1.33281e-07	1.77996e-06	52	11035	52
PRAD	TLR3	157.658	285.781	0.551831	2.64165e-08	4.70806e-07	52	7098	52
PRAD	TNF	5.49871	9.2511	0.598722	0.0153365	0.0357723	52	7124	52
STAD	FADD	816.757	500.47	1.63185	0.000210703	0.00208448	32	8772	32
STAD	FAS	473.58	410.796	1.1528	0.287083	0.41907	32	355	32
STAD	FASLG	40.8064	20.0196	2.03316	0.0348179	0.0891846	32	356	32
STAD	MLKL	530.856	366.715	1.44748	0.00119925	0.00718112	32	197259	32
STAD	RIPK1	1082.37	1138.49	0.950706	0.281513	0.413275	32	8737	32
STAD	RIPK3	404.632	444.572	0.910181	0.568587	0.676114	32	11035	32
STAD	TLR3	290.098	560.866	0.517318	7.3383e-05	0.000953791	32	7098	32
STAD	TNF	41.7013	26.7728	1.55553	0.220213	0.345515	32	7124	32
THCA	FADD	659.979	460.536	1.43297	1.64684e-12	2.59604e-11	59	8772	59
THCA	FAS	693.431	371.485	1.86641	1.70155e-07	9.45666e-07	59	355	59
THCA	FASLG	17.3824	20.5816	0.845311	0.509834	0.58849	59	356	59
THCA	MLKL	155.355	125.365	1.23903	0.0748852	0.120157	59	197259	59
THCA	RIPK1	824.497	1019.08	0.809077	3.94058e-11	4.68036e-10	59	8737	59
THCA	RIPK3	338.004	308.629	1.09515	0.24968	0.33163	59	11035	59
THCA	TLR3	107.583	238.685	0.450964	5.10074e-15	1.57668e-13	59	7098	59
THCA	TNF	16.0704	22.5416	0.714189	0.19512	0.270134	59	7124	59
