# Supplementary material for: Multi-omics analysis reveals the panoramic picture of necroptosis-related regulators in pan-cancer
Source: Aging (Albany NY). 2022 Jun 21;14(12):5034–58. doi: 10.18632/aging.204124 (PMC9271292; doi:10.18632/aging.204124)
Supplement: Supplementary Material 13 [file aging-14-204124-s013.xlsx]

## Sheet: SheetName
cancertype	diff_p	Subtype1	Subtype2	Subtype3	Subtype4	Subtype5	Subtype6
BLCA	0.650564	Non-Papillary (0.14/148)	Papillary (0.13/66)
BRCA	0.578821	Basal (0.16/140)	Her2 (0.12/67)	LumA (0.13/420)	LumB (0.13/193)	Normal_like (0.16/23)
COAD	0.278829	MSI-H (0.43/6)	MSI-L (0.28/6)	MSS (0.32/15)
GBM	1.22615e-07	Classical (-0.078/43)	G-CIMP (-0.19/8)	Mesenchymal (0.055/55)	Neural (0.0036/28)	Proneural (-0.21/30)
HNSC	0.291721	Negative (0.27/66)	Positive (0.31/23)
KIRC	0.0140851	1 (0.47/147)	2 (0.42/90)	3 (0.44/94)	4 (0.47/86)
LUAD	1.71742e-13	1 (0.19/22)	2 (0.022/32)	3 (0.26/51)	4 (0.31/32)	5 (0.27/52)	6 (0.34/41)
LUSC	1.03503e-11	basal (0.14/43)	classical (0.035/65)	primitive (-0.017/27)	secretory (0.22/43)
STAD	1.44801e-15	CIN (0.19/138)	EBV (0.38/25)	GS (0.27/54)	MSI (0.4/60)
