# Supplementary material for: Multi-omics analysis reveals the panoramic picture of necroptosis-related regulators in pan-cancer
Source: Aging (Albany NY). 2022 Jun 21;14(12):5034–58. doi: 10.18632/aging.204124 (PMC9271292; doi:10.18632/aging.204124)
Supplement: Supplementary Material 14 [file aging-14-204124-s014.xlsx]

## Sheet: SheetName
cancertype	sur_type	hr_categorical	coxp_categorical	logrankp	higher_risk_of_death	coxp_continus	hr_continus
ACC	OS	0.30853	0.00717648	0.0044411	Lower GSVA	0.00956725	0.121229
ACC	PFS	0.272688	0.000104213	3.5113e-05	Lower GSVA	0.000147994	0.0758772
ACC	DSS	0.233058	0.00348426	0.0014499	Lower GSVA	0.00134448	0.0637617
ACC	DFI	0.206013	0.0197591	0.00991078	Lower GSVA	0.0104458	0.0259813
BLCA	OS	0.851171	0.283455	0.282756	Lower GSVA	0.160642	0.551673
BLCA	PFS	0.845462	0.206095	0.205718	Lower GSVA	0.163245	0.58921
BLCA	DSS	0.870885	0.447409	0.446639	Lower GSVA	0.21635	0.529157
BLCA	DFI	0.531817	0.0871389	0.0820237	Lower GSVA	0.281935	0.344148
BRCA	OS	0.980823	0.904882	0.905809	Lower GSVA	0.214794	0.491271
BRCA	PFS	0.872926	0.330568	0.330708	Lower GSVA	0.0403828	0.35284
BRCA	DSS	0.961029	0.855417	0.857472	Lower GSVA	0.0605098	0.220633
BRCA	DFI	0.920208	0.703781	0.7037	Lower GSVA	0.148608	0.320652
CESC	OS	1.09397	0.702347	0.702104	Higher GSVA	0.305273	2.0634
CESC	PFS	0.883671	0.563992	0.56446	Lower GSVA	0.953745	1.03686
CESC	DSS	0.997705	0.993211	0.993236	Lower GSVA	0.475848	1.77131
CESC	DFI	0.660298	0.296488	0.293516	Lower GSVA	0.51826	0.497267
CHOL	OS	0.56357	0.259301	0.25287	Lower GSVA	0.734775	0.721999
CHOL	PFS	0.30944	0.0121968	0.00843562	Lower GSVA	0.237888	0.332103
CHOL	DSS	0.509579	0.219208	0.210653	Lower GSVA	0.545639	0.542229
CHOL	DFI	0.274045	0.0637912	0.0480372	Lower GSVA	0.319315	0.242704
COAD	OS	0.562668	0.0231799	0.0213618	Lower GSVA	0.0484938	0.155538
COAD	PFS	0.620558	0.0164623	0.0155559	Lower GSVA	0.00263415	0.093402
COAD	DSS	0.605633	0.143765	0.139668	Lower GSVA	0.254765	0.230033
COAD	DFI	0.700576	0.481904	0.479635	Lower GSVA	0.170977	0.0621767
DLBC	OS	1.95939	0.370452	0.362548	Higher GSVA	0.820949	1.51694
DLBC	PFS	2.09684	0.194726	0.185761	Higher GSVA	0.631803	1.92652
DLBC	DSS	1.05076	0.960528	0.960524	Higher GSVA	0.861034	0.629537
DLBC	DFI	2.9277	0.463451	0.445649	Higher GSVA	0.277527	1064.26
ESCA	OS	0.859209	0.506776	0.507209	Lower GSVA	0.429971	0.595971
ESCA	PFS	0.771285	0.169103	0.16775	Lower GSVA	0.0923921	0.400827
ESCA	DSS	0.825518	0.492103	0.49198	Lower GSVA	0.269432	0.414677
ESCA	DFI	0.605979	0.234172	0.229331	Lower GSVA	0.214458	0.236621
GBM	OS	1.36598	0.075154	0.0712516	Higher GSVA	0.364772	1.5614
GBM	PFS	1.67623	0.00231923	0.00205098	Higher GSVA	0.0446494	2.47353
GBM	DSS	1.32647	0.129503	0.124028	Higher GSVA	0.399842	1.58399
HNSC	OS	1.06474	0.642388	0.642104	Higher GSVA	0.676723	1.1711
HNSC	PFS	1.11468	0.372273	0.371902	Higher GSVA	0.838355	1.07192
HNSC	DSS	1.11806	0.525731	0.525343	Higher GSVA	0.578546	1.31148
HNSC	DFI	1.12147	0.780207	0.780095	Higher GSVA	0.70288	1.5478
KICH	OS	0.362385	0.206063	0.187165	Lower GSVA	0.218501	0.0930702
KICH	PFS	0.523641	0.290974	0.282622	Lower GSVA	0.388669	0.26261
KICH	DSS	0.213066	0.152748	0.115165	Lower GSVA	0.245158	0.0729073
KICH	DFI	1.27616	0.843013	0.842641	Higher GSVA	0.714547	2.84177
KIRC	OS	0.660207	0.00656348	0.0061828	Lower GSVA	0.154277	0.529944
KIRC	PFS	0.697757	0.0078444	0.00755474	Lower GSVA	0.149425	0.57304
KIRC	DSS	0.683748	0.0486707	0.0472673	Lower GSVA	0.12028	0.419437
KIRC	DFI	0.615208	0.355928	0.351527	Lower GSVA	0.680011	1.80683
KIRP	OS	0.707524	0.261426	0.259116	Lower GSVA	0.144199	0.183773
KIRP	PFS	0.799548	0.344759	0.343541	Lower GSVA	0.618445	0.645361
KIRP	DSS	0.430158	0.0442275	0.0383339	Lower GSVA	0.0211761	0.0403777
KIRP	DFI	0.730694	0.40557	0.403085	Lower GSVA	0.799048	1.42498
LAML	OS	0.819778	0.310851	0.307463	Lower GSVA	0.970724	1.01853
LGG	OS	1.53201	0.0142472	0.0137858	Higher GSVA	2.90096e-06	14.1163
LGG	PFS	1.41573	0.0105798	0.0105018	Higher GSVA	1.4489e-05	7.30069
LGG	DSS	1.51581	0.0225216	0.0219922	Higher GSVA	4.87469e-06	14.6997
LGG	DFI	1.12971	0.768624	0.769743	Higher GSVA	0.742072	1.51718
LIHC	OS	0.621127	0.00778924	0.00723539	Lower GSVA	0.00487945	0.177873
LIHC	PFS	0.695561	0.00668792	0.00645695	Lower GSVA	0.00562282	0.263512
LIHC	DSS	0.570776	0.0141716	0.0129318	Lower GSVA	0.00169016	0.0866891
LIHC	DFI	0.614239	0.00350861	0.00322635	Lower GSVA	0.00118813	0.148083
LUAD	OS	1.01617	0.914098	0.913848	Higher GSVA	0.428717	1.48549
LUAD	PFS	1.07904	0.540764	0.541138	Higher GSVA	0.349528	1.48361
LUAD	DSS	0.972596	0.883585	0.88417	Lower GSVA	0.732488	1.24076
LUAD	DFI	1.27063	0.258692	0.257382	Higher GSVA	0.152009	2.96275
LUSC	OS	1.2138	0.16073	0.16016	Higher GSVA	0.108976	2.1075
LUSC	PFS	1.06512	0.618217	0.618191	Higher GSVA	0.414898	1.41833
LUSC	DSS	1.28379	0.245085	0.244003	Higher GSVA	0.0748003	3.51199
LUSC	DFI	1.01529	0.952931	0.952904	Higher GSVA	0.642043	1.51069
MESO	OS	0.525297	0.00851715	0.00753113	Lower GSVA	0.00830417	0.233557
MESO	PFS	0.576075	0.0195564	0.018299	Lower GSVA	0.00213701	0.172559
MESO	DSS	0.527046	0.0416183	0.038519	Lower GSVA	0.0583038	0.276904
OV	OS	1.14534	0.362259	0.360329	Higher GSVA	0.730023	0.867713
OV	PFS	1.13268	0.339933	0.337348	Higher GSVA	0.89293	1.05017
OV	DSS	1.13485	0.435464	0.433041	Higher GSVA	0.55168	0.766673
OV	DFI	1.03178	0.874147	0.868697	Higher GSVA	0.813631	0.884927
PAAD	OS	1.37864	0.125024	0.123607	Higher GSVA	0.00091783	9.21757
PAAD	PFS	1.3876	0.0746672	0.0726641	Higher GSVA	0.000194442	7.68655
PAAD	DSS	1.29005	0.277633	0.276877	Higher GSVA	0.00352143	8.12923
PAAD	DFI	1.88889	0.136203	0.130116	Higher GSVA	0.0479611	8.35654
PCPG	OS	0.855388	0.828935	0.830037	Lower GSVA	0.73034	0.481209
PCPG	PFS	0.960242	0.920868	0.921798	Lower GSVA	0.792633	0.713373
PCPG	DSS	0.822436	0.816177	0.817231	Lower GSVA	0.732886	0.437143
PCPG	DFI	1.0599	0.95362	0.953613	Higher GSVA	0.588532	5.44434
PRAD	OS	0.651198	0.545854	0.543108	Lower GSVA	0.656662	0.260856
PRAD	PFS	0.835514	0.380454	0.379389	Lower GSVA	0.578307	0.613613
PRAD	DSS	0.969072	0.973561	0.97356	Lower GSVA	0.400125	0.0341824
PRAD	DFI	0.688031	0.304503	0.301395	Lower GSVA	0.07014	0.045851
READ	OS	0.543466	0.225369	0.222226	Lower GSVA	0.379681	0.341145
READ	PFS	0.543675	0.108383	0.105724	Lower GSVA	0.281412	0.364257
READ	DSS	0.47746	0.419035	0.40859	Lower GSVA	0.252711	0.0692903
READ	DFI	0.258106	0.229683	0.197229	Lower GSVA	0.526139	0.183822
SARC	OS	0.739453	0.137144	0.135607	Lower GSVA	0.00112306	0.140938
SARC	PFS	0.997553	0.98776	0.987467	Lower GSVA	0.0885923	0.44136
SARC	DSS	0.717958	0.138273	0.136412	Lower GSVA	0.00350686	0.143407
SARC	DFI	1.26905	0.323809	0.321569	Higher GSVA	0.843964	0.866176
SKCM	OS	0.566741	3.1316e-05	2.4624e-05	Lower GSVA	0.000289138	0.200976
SKCM	PFS	0.80206	0.0491115	0.0485256	Lower GSVA	0.0943287	0.533652
SKCM	DSS	0.537749	2.813e-05	2.1077e-05	Lower GSVA	7.7046e-05	0.138329
STAD	OS	0.768775	0.100904	0.100219	Lower GSVA	0.101111	0.476738
STAD	PFS	0.915134	0.53528	0.535265	Lower GSVA	0.333529	0.67318
STAD	DSS	0.663597	0.0503189	0.0487504	Lower GSVA	0.0283312	0.281963
STAD	DFI	0.857992	0.613188	0.612717	Lower GSVA	0.454844	0.523065
TGCT	OS	5.63433e+08	0.998682	0.0517996	Higher GSVA	0.0572976	137.598
TGCT	PFS	0.85144	0.607696	0.601172	Lower GSVA	0.619753	0.625152
TGCT	DSS	5.61807e+08	0.998859	0.0926065	Higher GSVA	0.0668516	126.209
TGCT	DFI	0.798273	0.525134	0.511334	Lower GSVA	0.471586	0.46149
THCA	OS	0.721971	0.528792	0.526986	Lower GSVA	0.0312471	0.0258559
THCA	PFS	1.17645	0.519765	0.51908	Higher GSVA	0.929032	1.07547
THCA	DSS	0.198754	0.135087	0.0967253	Lower GSVA	0.00219616	0.000526381
THCA	DFI	1.61606	0.220909	0.216711	Higher GSVA	0.0137016	19.1422
THYM	OS	14.6441	0.0149493	0.00271238	Higher GSVA	0.000413288	256.468
THYM	PFS	3.08913	0.0146526	0.0104435	Higher GSVA	0.0032543	18.7449
THYM	DSS	5.07995e+09	0.999174	0.005462	Higher GSVA	0.00596106	7984.6
UCEC	OS	0.705402	0.337765	0.335396	Lower GSVA	0.198185	0.307526
UCEC	PFS	0.97775	0.937038	0.93699	Lower GSVA	0.384084	0.539314
UCEC	DSS	0.722001	0.447778	0.44582	Lower GSVA	0.397759	0.395342
UCEC	DFI	0.8889	0.813946	0.813841	Lower GSVA	0.939773	0.908913
UCS	OS	1.16702	0.660847	0.660448	Higher GSVA	0.937184	0.939696
UCS	PFS	1.11425	0.73862	0.738619	Higher GSVA	0.588437	0.692855
UCS	DSS	1.06811	0.857952	0.857821	Higher GSVA	0.677892	0.703808
UCS	DFI	1.40641	0.623229	0.621775	Higher GSVA	0.628253	0.498372
UVM	OS	1.43931	0.390471	0.388056	Higher GSVA	0.0408881	5.99194
UVM	PFS	1.29579	0.459969	0.459033	Higher GSVA	0.063026	4.42746
UVM	DSS	1.33391	0.513482	0.512095	Higher GSVA	0.0897114	4.76094
