# Supplementary material for: Multi-omics analysis reveals the panoramic picture of necroptosis-related regulators in pan-cancer
Source: Aging (Albany NY). 2022 Jun 21;14(12):5034–58. doi: 10.18632/aging.204124 (PMC9271292; doi:10.18632/aging.204124)
Supplement: Supplementary Material 15 [file aging-14-204124-s015.xlsx]

## Sheet: SheetName
cancertype	symbol	cell_type	cor	p_value	fdr	entrez
ACC	FADD	Bcell	-0.190731	0.0922338	0.236248	8772
ACC	FADD	CD4_T	-0.0966148	0.39698	0.758151	8772
ACC	FADD	CD4_naive	-0.197112	0.081653	0.256924	8772
ACC	FADD	CD8_T	0.302536	0.00672917	0.0321253	8772
ACC	FADD	CD8_naive	-0.188455	0.0962595	0.306314	8772
ACC	FADD	Central_memory	-0.0569432	0.61816	0.813493	8772
ACC	FADD	Cytotoxic	0.2995	0.00733077	0.031448	8772
ACC	FADD	DC	-0.00820445	0.942792	0.980275	8772
ACC	FADD	Effector_memory	0.0900801	0.429823	0.788898	8772
ACC	FADD	Exhausted	0.204762	0.0702666	0.255703	8772
ACC	FADD	Gamma_delta	0.0469683	0.681046	0.832218	8772
ACC	FADD	InfiltrationScore	0.149274	0.189184	0.385362	8772
ACC	FADD	MAIT	0.253425	0.0242269	0.0943504	8772
ACC	FADD	Macrophage	0.0725684	0.525063	0.749073	8772
ACC	FADD	Monocyte	-0.115206	0.312005	0.720983	8772
ACC	FADD	NK	0.343134	0.00196285	0.0148262	8772
ACC	FADD	NKT	0.219398	0.0520516	0.178487	8772
ACC	FADD	Neutrophil	-0.247005	0.0281949	0.0843958	8772
ACC	FADD	Tfh	0.270638	0.0158503	0.0715703	8772
ACC	FADD	Th1	0.236991	0.035474	0.114134	8772
ACC	FADD	Th17	-0.0961296	0.399366	0.62501	8772
ACC	FADD	Th2	0.186859	0.0991634	0.237309	8772
ACC	FADD	Tr1	-0.0391582	0.731877	0.961137	8772
ACC	FADD	iTreg	0.0270159	0.81317	0.905968	8772
ACC	FADD	nTreg	0.109934	0.334811	0.602613	8772
ACC	FAS	Bcell	-0.141831	0.212455	0.404059	355
ACC	FAS	CD4_T	0.11317	0.320693	0.701635	355
ACC	FAS	CD4_naive	-0.00128475	0.991034	0.996353	355
ACC	FAS	CD8_T	0.110753	0.331199	0.518825	355
ACC	FAS	CD8_naive	-0.0343409	0.763832	0.888308	355
ACC	FAS	Central_memory	0.118138	0.299766	0.57166	355
ACC	FAS	Cytotoxic	0.129532	0.255221	0.429201	355
ACC	FAS	DC	-0.156299	0.168964	0.481926	355
ACC	FAS	Effector_memory	0.0159756	0.888865	0.970062	355
ACC	FAS	Exhausted	0.113181	0.320643	0.584539	355
ACC	FAS	Gamma_delta	0.220196	0.0511816	0.18878	355
ACC	FAS	InfiltrationScore	0.0259644	0.820318	0.902446	355
ACC	FAS	MAIT	0.176436	0.119844	0.281625	355
ACC	FAS	Macrophage	-0.0034568	0.97588	0.98987	355
ACC	FAS	Monocyte	-0.100696	0.377245	0.760249	355
ACC	FAS	NK	0.165171	0.145758	0.307147	355
ACC	FAS	NKT	0.120096	0.291773	0.517623	355
ACC	FAS	Neutrophil	-0.255514	0.0230424	0.0724226	355
ACC	FAS	Tfh	0.169854	0.134515	0.311987	355
ACC	FAS	Th1	0.153174	0.177753	0.347744	355
ACC	FAS	Th17	-0.218455	0.053094	0.188062	355
ACC	FAS	Th2	0.228019	0.0432716	0.134287	355
ACC	FAS	Tr1	-0.0390483	0.732601	0.961307	355
ACC	FAS	iTreg	0.0240239	0.833546	0.917152	355
ACC	FAS	nTreg	0.103279	0.365065	0.629639	355
ACC	FASLG	Bcell	-0.679537	5.76943e-12	1.15795e-09	356
ACC	FASLG	CD4_T	0.235827	0.0364138	0.303815	356
ACC	FASLG	CD4_naive	-0.551687	1.3666e-07	1.1841e-05	356
ACC	FASLG	CD8_T	0.696343	1.03948e-12	2.56079e-10	356
ACC	FASLG	CD8_naive	-0.390964	0.000367358	0.0110822	356
ACC	FASLG	Central_memory	-0.166409	0.142719	0.387799	356
ACC	FASLG	Cytotoxic	0.729807	2.35368e-14	4.79247e-12	356
ACC	FASLG	DC	0.0969416	0.395377	0.699845	356
ACC	FASLG	Effector_memory	0.55889	8.65033e-08	0.000110201	356
ACC	FASLG	Exhausted	0.597811	5.99268e-09	6.81329e-07	356
ACC	FASLG	Gamma_delta	0.234984	0.037108	0.155624	356
ACC	FASLG	InfiltrationScore	0.549521	1.56482e-07	6.92016e-06	356
ACC	FASLG	MAIT	0.580181	2.09685e-08	3.05503e-06	356
ACC	FASLG	Macrophage	0.35023	0.00155538	0.0245806	356
ACC	FASLG	Monocyte	-0.22298	0.0482401	0.439522	356
ACC	FASLG	NK	0.75704	6.94002e-16	6.82516e-12	356
ACC	FASLG	NKT	0.388352	0.000405284	0.00662087	356
ACC	FASLG	Neutrophil	-0.73964	6.9364e-15	2.27387e-12	356
ACC	FASLG	Tfh	0.634641	3.37611e-10	3.92927e-08	356
ACC	FASLG	Th1	0.740407	6.29089e-15	2.06226e-12	356
ACC	FASLG	Th17	-0.284004	0.0111962	0.0699075	356
ACC	FASLG	Th2	0.670966	1.3247e-11	4.20249e-09	356
ACC	FASLG	Tr1	-0.17211	0.12934	0.734502	356
ACC	FASLG	iTreg	0.647645	1.11339e-10	2.07036e-07	356
ACC	FASLG	nTreg	0.544624	2.11791e-07	0.00103378	356
ACC	MLKL	Bcell	-0.47964	7.73163e-06	0.000196986	197259
ACC	MLKL	CD4_T	0.361164	0.00107527	0.0688908	197259
ACC	MLKL	CD4_naive	-0.424657	9.5961e-05	0.00231873	197259
ACC	MLKL	CD8_T	0.486748	5.40301e-06	0.000120901	197259
ACC	MLKL	CD8_naive	-0.277527	0.0132772	0.0950927	197259
ACC	MLKL	Central_memory	-0.19677	0.0821951	0.281311	197259
ACC	MLKL	Cytotoxic	0.610015	2.4066e-09	1.07094e-07	197259
ACC	MLKL	DC	0.0548505	0.631147	0.849868	197259
ACC	MLKL	Effector_memory	0.273362	0.0147856	0.201956	197259
ACC	MLKL	Exhausted	0.555204	1.09462e-07	8.12456e-06	197259
ACC	MLKL	Gamma_delta	0.18528	0.102103	0.28817	197259
ACC	MLKL	InfiltrationScore	0.4356	6.0131e-05	0.00117684	197259
ACC	MLKL	MAIT	0.393369	0.000335351	0.00453334	197259
ACC	MLKL	Macrophage	0.322955	0.00369664	0.045077	197259
ACC	MLKL	Monocyte	0.0499461	0.662018	0.90181	197259
ACC	MLKL	NK	0.490229	4.51984e-06	0.000161052	197259
ACC	MLKL	NKT	0.145932	0.199394	0.414478	197259
ACC	MLKL	Neutrophil	-0.586928	1.30985e-08	5.52627e-07	197259
ACC	MLKL	Tfh	0.493302	3.85475e-06	0.000102736	197259
ACC	MLKL	Th1	0.548427	1.67502e-07	5.65964e-06	197259
ACC	MLKL	Th17	-0.353745	0.00138326	0.0176327	197259
ACC	MLKL	Th2	0.516625	1.0936e-06	4.8038e-05	197259
ACC	MLKL	Tr1	0.0180279	0.874698	0.982532	197259
ACC	MLKL	iTreg	0.362724	0.00101902	0.0112791	197259
ACC	MLKL	nTreg	0.28809	0.0100351	0.0884321	197259
ACC	RIPK1	Bcell	-0.154723	0.173356	0.356183	8737
ACC	RIPK1	CD4_T	0.155458	0.171297	0.559211	8737
ACC	RIPK1	CD4_naive	0.0386724	0.73508	0.868363	8737
ACC	RIPK1	CD8_T	-0.0437341	0.701939	0.822693	8737
ACC	RIPK1	CD8_naive	-0.349264	0.00160591	0.0273224	8737
ACC	RIPK1	Central_memory	-0.0739992	0.516904	0.750941	8737
ACC	RIPK1	Cytotoxic	0.0628066	0.5824	0.729353	8737
ACC	RIPK1	DC	0.202713	0.0731829	0.328263	8737
ACC	RIPK1	Effector_memory	0.0585603	0.608203	0.877726	8737
ACC	RIPK1	Exhausted	0.0740215	0.516778	0.737627	8737
ACC	RIPK1	Gamma_delta	-0.0989281	0.385719	0.616555	8737
ACC	RIPK1	InfiltrationScore	0.219851	0.0515557	0.166675	8737
ACC	RIPK1	MAIT	-0.0171506	0.880749	0.940862	8737
ACC	RIPK1	Macrophage	0.174033	0.125051	0.365745	8737
ACC	RIPK1	Monocyte	0.00695083	0.951521	0.990685	8737
ACC	RIPK1	NK	0.216377	0.0554538	0.159509	8737
ACC	RIPK1	NKT	0.175374	0.122123	0.307483	8737
ACC	RIPK1	Neutrophil	-0.000864294	0.993968	0.99691	8737
ACC	RIPK1	Tfh	-0.0300355	0.792731	0.890273	8737
ACC	RIPK1	Th1	0.097316	0.393546	0.581086	8737
ACC	RIPK1	Th17	0.11148	0.328019	0.559606	8737
ACC	RIPK1	Th2	0.0377228	0.741354	0.851784	8737
ACC	RIPK1	Tr1	-0.156364	0.168783	0.753673	8737
ACC	RIPK1	iTreg	0.323152	0.00367459	0.0276281	8737
ACC	RIPK1	nTreg	0.217666	0.0539802	0.225521	8737
ACC	RIPK3	Bcell	-0.674011	9.891e-12	1.83534e-09	11035
ACC	RIPK3	CD4_T	0.341286	0.00208361	0.0906469	11035
ACC	RIPK3	CD4_naive	-0.625182	7.32657e-10	2.52818e-07	11035
ACC	RIPK3	CD8_T	0.617561	1.34242e-09	1.16507e-07	11035
ACC	RIPK3	CD8_naive	-0.444204	4.1169e-05	0.00342041	11035
ACC	RIPK3	Central_memory	-0.301281	0.00697243	0.061581	11035
ACC	RIPK3	Cytotoxic	0.681646	4.68193e-12	4.61635e-10	11035
ACC	RIPK3	DC	0.502273	2.40055e-06	0.000536549	11035
ACC	RIPK3	Effector_memory	0.478291	8.26828e-06	0.0018693	11035
ACC	RIPK3	Exhausted	0.611568	2.13686e-09	3.02374e-07	11035
ACC	RIPK3	Gamma_delta	0.204722	0.0703222	0.228843	11035
ACC	RIPK3	InfiltrationScore	0.800441	8.62547e-19	4.98984e-16	11035
ACC	RIPK3	MAIT	0.577631	2.49809e-08	3.43601e-06	11035
ACC	RIPK3	Macrophage	0.718855	8.63285e-14	1.3584e-11	11035
ACC	RIPK3	Monocyte	0.0732211	0.521333	0.839537	11035
ACC	RIPK3	NK	0.538137	3.1395e-07	2.3041e-05	11035
ACC	RIPK3	NKT	0.43681	5.7048e-05	0.00183947	11035
ACC	RIPK3	Neutrophil	-0.651714	7.78212e-11	7.35897e-09	11035
ACC	RIPK3	Tfh	0.646675	1.21159e-10	1.70402e-08	11035
ACC	RIPK3	Th1	0.65772	4.54115e-11	4.29422e-09	11035
ACC	RIPK3	Th17	-0.415353	0.000141024	0.00432699	11035
ACC	RIPK3	Th2	0.549863	1.53183e-07	1.0761e-05	11035
ACC	RIPK3	Tr1	-0.00845211	0.941068	0.994852	11035
ACC	RIPK3	iTreg	0.521765	8.17958e-07	7.9646e-05	11035
ACC	RIPK3	nTreg	0.336754	0.00240863	0.0410007	11035
ACC	TLR3	Bcell	0.0509209	0.655835	0.799729	7098
ACC	TLR3	CD4_T	-0.00139986	0.990231	0.997644	7098
ACC	TLR3	CD4_naive	0.249904	0.0263399	0.124989	7098
ACC	TLR3	CD8_T	-0.070184	0.538803	0.702021	7098
ACC	TLR3	CD8_naive	0.075304	0.50952	0.739448	7098
ACC	TLR3	Central_memory	0.453617	2.688e-05	0.00155958	7098
ACC	TLR3	Cytotoxic	-0.115571	0.310463	0.488754	7098
ACC	TLR3	DC	-0.198295	0.0798031	0.343167	7098
ACC	TLR3	Effector_memory	-0.234673	0.0373664	0.308548	7098
ACC	TLR3	Exhausted	-0.191562	0.0907983	0.296368	7098
ACC	TLR3	Gamma_delta	0.0997194	0.381911	0.613604	7098
ACC	TLR3	InfiltrationScore	-0.219535	0.0519013	0.167352	7098
ACC	TLR3	MAIT	-0.0523404	0.646873	0.798854	7098
ACC	TLR3	Macrophage	-0.172256	0.129012	0.372262	7098
ACC	TLR3	Monocyte	-0.182547	0.10735	0.540087	7098
ACC	TLR3	NK	-0.129069	0.256939	0.447907	7098
ACC	TLR3	NKT	0.164496	0.147432	0.34338	7098
ACC	TLR3	Neutrophil	0.0847982	0.457464	0.621528	7098
ACC	TLR3	Tfh	-0.0859801	0.451195	0.652493	7098
ACC	TLR3	Th1	-0.126541	0.266452	0.452421	7098
ACC	TLR3	Th17	0.260878	0.0202252	0.103171	7098
ACC	TLR3	Th2	-0.159959	0.15908	0.326715	7098
ACC	TLR3	Tr1	-0.105896	0.352975	0.861204	7098
ACC	TLR3	iTreg	-0.127543	0.262654	0.479548	7098
ACC	TLR3	nTreg	-0.111468	0.32807	0.596212	7098
ACC	TNF	Bcell	-0.495987	3.35004e-06	9.8641e-05	7124
ACC	TNF	CD4_T	0.291343	0.00918699	0.168156	7124
ACC	TNF	CD4_naive	-0.386455	0.000435046	0.00754579	7124
ACC	TNF	CD8_T	0.381949	0.000513899	0.00442165	7124
ACC	TNF	CD8_naive	-0.26142	0.0199575	0.121978	7124
ACC	TNF	Central_memory	-0.0900534	0.42996	0.687667	7124
ACC	TNF	Cytotoxic	0.395655	0.000307308	0.00246712	7124
ACC	TNF	DC	0.185181	0.102289	0.388702	7124
ACC	TNF	Effector_memory	0.303653	0.00651914	0.134974	7124
ACC	TNF	Exhausted	0.574767	3.03546e-08	2.68939e-06	7124
ACC	TNF	Gamma_delta	0.116564	0.306295	0.543145	7124
ACC	TNF	InfiltrationScore	0.417166	0.000130943	0.00219942	7124
ACC	TNF	MAIT	0.386125	0.000440413	0.00553513	7124
ACC	TNF	Macrophage	0.442347	4.4715e-05	0.00148062	7124
ACC	TNF	Monocyte	-0.136128	0.231611	0.661359	7124
ACC	TNF	NK	0.399396	0.00026603	0.00343794	7124
ACC	TNF	NKT	0.206808	0.0674478	0.211079	7124
ACC	TNF	Neutrophil	-0.461946	1.8239e-05	0.000248777	7124
ACC	TNF	Tfh	0.379605	0.000559901	0.0056708	7124
ACC	TNF	Th1	0.421476	0.000109596	0.0013025	7124
ACC	TNF	Th17	-0.176877	0.118907	0.307855	7124
ACC	TNF	Th2	0.392798	0.000342711	0.00393588	7124
ACC	TNF	Tr1	-0.200453	0.0765118	0.671184	7124
ACC	TNF	iTreg	0.334381	0.00259636	0.0216389	7124
ACC	TNF	nTreg	0.198292	0.0798072	0.280613	7124
BLCA	FADD	Bcell	-0.0818913	0.0910128	0.180758	8772
BLCA	FADD	CD4_T	-0.210077	1.2019e-05	4.1809e-05	8772
BLCA	FADD	CD4_naive	-0.0896129	0.0643058	0.118157	8772
BLCA	FADD	CD8_T	0.0505861	0.296988	0.512877	8772
BLCA	FADD	CD8_naive	-0.249446	1.76787e-07	1.05511e-06	8772
BLCA	FADD	Central_memory	-0.103563	0.032395	0.0726404	8772
BLCA	FADD	Cytotoxic	0.191165	7.0269e-05	0.000199476	8772
BLCA	FADD	DC	0.290342	9.70165e-10	9.53893e-09	8772
BLCA	FADD	Effector_memory	0.136089	0.0048471	0.0210817	8772
BLCA	FADD	Exhausted	0.23662	7.59188e-07	2.89549e-06	8772
BLCA	FADD	Gamma_delta	-0.149296	0.00197911	0.00644245	8772
BLCA	FADD	InfiltrationScore	0.244964	2.96931e-07	1.01901e-06	8772
BLCA	FADD	MAIT	-0.00423661	0.930442	0.97323	8772
BLCA	FADD	Macrophage	0.244543	3.11588e-07	1.00258e-06	8772
BLCA	FADD	Monocyte	0.209735	1.2427e-05	0.00015676	8772
BLCA	FADD	NK	0.0851066	0.0789735	0.124866	8772
BLCA	FADD	NKT	0.0719172	0.137899	0.204991	8772
BLCA	FADD	Neutrophil	-0.0747457	0.123031	0.190295	8772
BLCA	FADD	Tfh	-0.0671445	0.166062	0.28698	8772
BLCA	FADD	Th1	0.245253	2.87259e-07	1.514e-06	8772
BLCA	FADD	Th17	-0.144775	0.00271166	0.00814754	8772
BLCA	FADD	Th2	-0.021971	0.650741	0.738984	8772
BLCA	FADD	Tr1	0.0346736	0.474851	0.627115	8772
BLCA	FADD	iTreg	0.145047	0.00266144	0.00628241	8772
BLCA	FADD	nTreg	0.109849	0.023199	0.0642156	8772
BLCA	FAS	Bcell	-0.224609	2.76231e-06	4.534e-05	355
BLCA	FAS	CD4_T	0.0458744	0.344319	0.432315	355
BLCA	FAS	CD4_naive	-0.35787	2.3952e-14	6.94954e-13	355
BLCA	FAS	CD8_T	0.0902455	0.0624385	0.181818	355
BLCA	FAS	CD8_naive	-0.449348	1.30794e-22	7.3873e-21	355
BLCA	FAS	Central_memory	0.224036	2.93276e-06	2.6491e-05	355
BLCA	FAS	Cytotoxic	0.560382	1.12684e-36	4.3322e-35	355
BLCA	FAS	DC	0.281224	3.34006e-09	2.95073e-08	355
BLCA	FAS	Effector_memory	0.0203098	0.675586	0.791768	355
BLCA	FAS	Exhausted	0.482199	3.00778e-26	1.06287e-24	355
BLCA	FAS	Gamma_delta	-0.139469	0.00388129	0.0113762	355
BLCA	FAS	InfiltrationScore	0.480721	4.47218e-26	7.7653e-25	355
BLCA	FAS	MAIT	-0.021931	0.651335	0.842266	355
BLCA	FAS	Macrophage	0.469374	8.8229e-25	1.56716e-23	355
BLCA	FAS	Monocyte	0.0906249	0.0613404	0.13695	355
BLCA	FAS	NK	0.504618	5.7479e-29	1.83741e-27	355
BLCA	FAS	NKT	0.334837	1.20417e-12	1.47996e-11	355
BLCA	FAS	Neutrophil	-0.511885	6.82564e-30	1.58297e-28	355
BLCA	FAS	Tfh	0.324513	6.28891e-12	1.06172e-10	355
BLCA	FAS	Th1	0.4836	2.06139e-26	8.59923e-25	355
BLCA	FAS	Th17	-0.201964	2.616e-05	0.000144591	355
BLCA	FAS	Th2	0.415535	2.9576e-19	5.65828e-18	355
BLCA	FAS	Tr1	0.16828	0.000479268	0.00250433	355
BLCA	FAS	iTreg	0.457205	1.91385e-23	8.13569e-22	355
BLCA	FAS	nTreg	-0.0210669	0.664217	0.776388	355
BLCA	FASLG	Bcell	-0.137936	0.00429551	0.0162839	356
BLCA	FASLG	CD4_T	0.0225052	0.642833	0.715536	356
BLCA	FASLG	CD4_naive	-0.58936	2.72587e-41	3.65393e-38	356
BLCA	FASLG	CD8_T	0.60756	1.94759e-44	1.05839e-41	356
BLCA	FASLG	CD8_naive	-0.591045	1.42109e-41	1.42869e-38	356
BLCA	FASLG	Central_memory	0.162737	0.000736931	0.00300131	356
BLCA	FASLG	Cytotoxic	0.8438	6.05636e-117	6.08876e-114	356
BLCA	FASLG	DC	0.177163	0.000233875	0.000715212	356
BLCA	FASLG	Effector_memory	0.338661	6.4246e-13	2.48422e-10	356
BLCA	FASLG	Exhausted	0.725893	4.4595e-71	3.321e-68	356
BLCA	FASLG	Gamma_delta	0.261468	4.18645e-08	7.37101e-07	356
BLCA	FASLG	InfiltrationScore	0.623739	2.07525e-47	9.88791e-46	356
BLCA	FASLG	MAIT	-0.0808524	0.095203	0.33501	356
BLCA	FASLG	Macrophage	0.448565	1.57961e-22	2.24778e-21	356
BLCA	FASLG	Monocyte	-0.20052	2.9949e-05	0.000316437	356
BLCA	FASLG	NK	0.786708	4.56604e-91	7.65078e-88	356
BLCA	FASLG	NKT	0.050401	0.298762	0.391987	356
BLCA	FASLG	Neutrophil	-0.714612	5.92699e-68	5.02844e-66	356
BLCA	FASLG	Tfh	0.596032	2.02062e-42	1.88971e-40	356
BLCA	FASLG	Th1	0.794265	5.19995e-94	7.46824e-91	356
BLCA	FASLG	Th17	-0.390286	5.48941e-17	5.60282e-15	356
BLCA	FASLG	Th2	0.480853	4.31612e-26	1.5665e-24	356
BLCA	FASLG	Tr1	0.142683	0.00312789	0.0125384	356
BLCA	FASLG	iTreg	0.704077	3.59562e-65	7.22972e-62	356
BLCA	FASLG	nTreg	0.208594	1.3886e-05	0.000128115	356
BLCA	MLKL	Bcell	-0.250171	1.62428e-07	4.7401e-06	197259
BLCA	MLKL	CD4_T	0.0820939	0.090213	0.136796	197259
BLCA	MLKL	CD4_naive	-0.342819	3.21258e-13	8.0144e-12	197259
BLCA	MLKL	CD8_T	0.161411	0.00081516	0.00698654	197259
BLCA	MLKL	CD8_naive	-0.498407	3.41093e-28	3.98741e-26	197259
BLCA	MLKL	Central_memory	0.0521309	0.282462	0.404348	197259
BLCA	MLKL	Cytotoxic	0.541756	6.13251e-34	2.20218e-32	197259
BLCA	MLKL	DC	0.269665	1.50297e-08	1.15345e-07	197259
BLCA	MLKL	Effector_memory	0.17866	0.000206529	0.00168057	197259
BLCA	MLKL	Exhausted	0.454653	3.5923e-23	9.77406e-22	197259
BLCA	MLKL	Gamma_delta	0.0230194	0.635257	0.730852	197259
BLCA	MLKL	InfiltrationScore	0.449661	1.21269e-22	1.66555e-21	197259
BLCA	MLKL	MAIT	0.052003	0.283646	0.571752	197259
BLCA	MLKL	Macrophage	0.363556	8.66099e-15	6.09318e-14	197259
BLCA	MLKL	Monocyte	0.120423	0.0127672	0.0407541	197259
BLCA	MLKL	NK	0.457489	1.78363e-23	4.10338e-22	197259
BLCA	MLKL	NKT	0.214279	7.93763e-06	3.2217e-05	197259
BLCA	MLKL	Neutrophil	-0.401579	5.60702e-18	6.89122e-17	197259
BLCA	MLKL	Tfh	0.319359	1.40243e-11	2.27592e-10	197259
BLCA	MLKL	Th1	0.498244	3.57253e-28	1.61422e-26	197259
BLCA	MLKL	Th17	-0.271974	1.11914e-08	1.57912e-07	197259
BLCA	MLKL	Th2	0.253079	1.15278e-07	7.32118e-07	197259
BLCA	MLKL	Tr1	0.0896778	0.0641121	0.145817	197259
BLCA	MLKL	iTreg	0.382943	2.31036e-16	5.24909e-15	197259
BLCA	MLKL	nTreg	0.0460706	0.342256	0.493209	197259
BLCA	RIPK1	Bcell	-0.044803	0.355716	0.498112	8737
BLCA	RIPK1	CD4_T	0.0997224	0.0394217	0.0661095	8737
BLCA	RIPK1	CD4_naive	-0.0265105	0.584857	0.6866	8737
BLCA	RIPK1	CD8_T	0.0882864	0.0683699	0.194086	8737
BLCA	RIPK1	CD8_naive	-0.159337	0.000953113	0.00267769	8737
BLCA	RIPK1	Central_memory	0.0102995	0.831942	0.887702	8737
BLCA	RIPK1	Cytotoxic	0.102751	0.0337832	0.0572072	8737
BLCA	RIPK1	DC	-0.0702577	0.147243	0.214646	8737
BLCA	RIPK1	Effector_memory	0.117572	0.0150649	0.0510208	8737
BLCA	RIPK1	Exhausted	-0.00066772	0.989024	0.992083	8737
BLCA	RIPK1	Gamma_delta	0.00231388	0.961976	0.973992	8737
BLCA	RIPK1	InfiltrationScore	-0.0224047	0.644317	0.709102	8737
BLCA	RIPK1	MAIT	0.0803749	0.09718	0.33812	8737
BLCA	RIPK1	Macrophage	-0.0672109	0.165643	0.220905	8737
BLCA	RIPK1	Monocyte	-0.145671	0.00254921	0.0114006	8737
BLCA	RIPK1	NK	0.101164	0.0366453	0.0638831	8737
BLCA	RIPK1	NKT	0.070562	0.145494	0.21468	8737
BLCA	RIPK1	Neutrophil	-0.0517606	0.2859	0.381967	8737
BLCA	RIPK1	Tfh	0.132276	0.00619303	0.0201622	8737
BLCA	RIPK1	Th1	0.0992546	0.0403599	0.0700187	8737
BLCA	RIPK1	Th17	0.0805253	0.0965538	0.167247	8737
BLCA	RIPK1	Th2	0.00778786	0.87252	0.911411	8737
BLCA	RIPK1	Tr1	-0.055672	0.251	0.404897	8737
BLCA	RIPK1	iTreg	0.105398	0.029434	0.0535399	8737
BLCA	RIPK1	nTreg	0.0855691	0.0773531	0.164106	8737
BLCA	RIPK3	Bcell	0.0541586	0.264135	0.402406	11035
BLCA	RIPK3	CD4_T	0.2381	6.44302e-07	2.8163e-06	11035
BLCA	RIPK3	CD4_naive	-0.0295622	0.542381	0.650532	11035
BLCA	RIPK3	CD8_T	0.119908	0.013158	0.0597757	11035
BLCA	RIPK3	CD8_naive	-0.0617636	0.202749	0.287962	11035
BLCA	RIPK3	Central_memory	0.00294895	0.951552	0.968663	11035
BLCA	RIPK3	Cytotoxic	0.02649	0.585148	0.660801	11035
BLCA	RIPK3	DC	-0.199549	3.2782e-05	0.000120196	11035
BLCA	RIPK3	Effector_memory	0.0592213	0.221998	0.378537	11035
BLCA	RIPK3	Exhausted	-0.0394343	0.416334	0.500433	11035
BLCA	RIPK3	Gamma_delta	0.158528	0.00101251	0.00365743	11035
BLCA	RIPK3	InfiltrationScore	-0.0419335	0.387394	0.464152	11035
BLCA	RIPK3	MAIT	-0.00737126	0.879285	0.951396	11035
BLCA	RIPK3	Macrophage	-0.108479	0.0249832	0.0406027	11035
BLCA	RIPK3	Monocyte	-0.0851898	0.0786798	0.165017	11035
BLCA	RIPK3	NK	0.0503545	0.299208	0.388447	11035
BLCA	RIPK3	NKT	-0.0361705	0.455982	0.551073	11035
BLCA	RIPK3	Neutrophil	-0.113107	0.0193924	0.039	11035
BLCA	RIPK3	Tfh	0.233452	1.07461e-06	9.03692e-06	11035
BLCA	RIPK3	Th1	-0.0198481	0.682555	0.754239	11035
BLCA	RIPK3	Th17	0.0656201	0.17591	0.27257	11035
BLCA	RIPK3	Th2	0.0902784	0.0623427	0.111952	11035
BLCA	RIPK3	Tr1	-0.0985583	0.041791	0.10467	11035
BLCA	RIPK3	iTreg	-0.0514006	0.289268	0.38259	11035
BLCA	RIPK3	nTreg	-0.00643572	0.89451	0.936816	11035
BLCA	TLR3	Bcell	-0.169913	0.000421139	0.00259948	7098
BLCA	TLR3	CD4_T	0.0256208	0.597526	0.676642	7098
BLCA	TLR3	CD4_naive	-0.128212	0.00798839	0.0201281	7098
BLCA	TLR3	CD8_T	0.0891479	0.0657071	0.188658	7098
BLCA	TLR3	CD8_naive	-0.245813	2.69366e-07	1.5586e-06	7098
BLCA	TLR3	Central_memory	0.182749	0.000146292	0.000766015	7098
BLCA	TLR3	Cytotoxic	0.223883	2.97999e-06	1.0609e-05	7098
BLCA	TLR3	DC	0.0216685	0.655238	0.729304	7098
BLCA	TLR3	Effector_memory	0.172851	0.000332761	0.00249658	7098
BLCA	TLR3	Exhausted	0.154682	0.00134453	0.00300851	7098
BLCA	TLR3	Gamma_delta	0.0142855	0.768494	0.834572	7098
BLCA	TLR3	InfiltrationScore	0.0278759	0.565663	0.638654	7098
BLCA	TLR3	MAIT	-0.0205199	0.672423	0.85407	7098
BLCA	TLR3	Macrophage	0.038954	0.422038	0.496688	7098
BLCA	TLR3	Monocyte	-0.0718596	0.138215	0.251616	7098
BLCA	TLR3	NK	0.14101	0.00350164	0.00774815	7098
BLCA	TLR3	NKT	-0.0231447	0.633417	0.715713	7098
BLCA	TLR3	Neutrophil	-0.195373	4.8119e-05	0.000176945	7098
BLCA	TLR3	Tfh	0.224327	2.84515e-06	2.2011e-05	7098
BLCA	TLR3	Th1	0.262833	3.53833e-08	2.20537e-07	7098
BLCA	TLR3	Th17	0.131064	0.00668635	0.0177482	7098
BLCA	TLR3	Th2	0.134494	0.00537455	0.0133333	7098
BLCA	TLR3	Tr1	0.0114283	0.813845	0.885209	7098
BLCA	TLR3	iTreg	0.281789	3.09788e-09	2.45426e-08	7098
BLCA	TLR3	nTreg	0.053655	0.268609	0.414562	7098
BLCA	TNF	Bcell	-0.0753644	0.119952	0.223716	7124
BLCA	TNF	CD4_T	0.0677056	0.162543	0.228119	7124
BLCA	TNF	CD4_naive	-0.222918	3.29494e-06	2.1378e-05	7124
BLCA	TNF	CD8_T	0.131231	0.00661646	0.0362598	7124
BLCA	TNF	CD8_naive	-0.316483	2.17967e-11	2.58259e-10	7124
BLCA	TNF	Central_memory	0.113164	0.0193309	0.0474066	7124
BLCA	TNF	Cytotoxic	0.405103	2.70266e-18	4.14511e-17	7124
BLCA	TNF	DC	0.222432	3.46517e-06	1.5594e-05	7124
BLCA	TNF	Effector_memory	0.0287433	0.553629	0.697307	7124
BLCA	TNF	Exhausted	0.370753	2.32052e-15	2.74787e-14	7124
BLCA	TNF	Gamma_delta	-0.101704	0.0356493	0.0737449	7124
BLCA	TNF	InfiltrationScore	0.393017	3.18758e-17	2.95086e-16	7124
BLCA	TNF	MAIT	-0.0581045	0.230854	0.515753	7124
BLCA	TNF	Macrophage	0.328048	3.59572e-12	1.97269e-11	7124
BLCA	TNF	Monocyte	0.0128442	0.791284	0.869465	7124
BLCA	TNF	NK	0.322304	8.88494e-12	7.55708e-11	7124
BLCA	TNF	NKT	0.24288	3.76578e-07	1.95151e-06	7124
BLCA	TNF	Neutrophil	-0.29535	4.82746e-10	3.48406e-09	7124
BLCA	TNF	Tfh	0.22485	2.69354e-06	2.0935e-05	7124
BLCA	TNF	Th1	0.366055	5.50259e-15	9.69681e-14	7124
BLCA	TNF	Th17	-0.102829	0.0336483	0.0701469	7124
BLCA	TNF	Th2	0.145836	0.00252035	0.00680863	7124
BLCA	TNF	Tr1	0.28275	2.72418e-09	3.41278e-08	7124
BLCA	TNF	iTreg	0.392489	3.54221e-17	8.8807e-16	7124
BLCA	TNF	nTreg	0.0387072	0.424987	0.575125	7124
BRCA	FADD	Bcell	0.124403	1.3361e-05	3.2267e-05	8772
BRCA	FADD	CD4_T	-0.220066	7.98702e-15	2.97711e-14	8772
BRCA	FADD	CD4_naive	-0.0341547	0.233607	0.694624	8772
BRCA	FADD	CD8_T	0.168582	3.222e-09	1.38202e-08	8772
BRCA	FADD	CD8_naive	0.105203	0.000235059	0.000505741	8772
BRCA	FADD	Central_memory	-0.129038	6.25214e-06	1.6281e-05	8772
BRCA	FADD	Cytotoxic	0.0131514	0.64657	0.702363	8772
BRCA	FADD	DC	0.148495	1.92925e-07	5.23409e-07	8772
BRCA	FADD	Effector_memory	0.177338	4.60026e-10	2.21131e-09	8772
BRCA	FADD	Exhausted	0.0837401	0.00344837	0.00590389	8772
BRCA	FADD	Gamma_delta	-0.00673668	0.814309	0.849353	8772
BRCA	FADD	InfiltrationScore	0.181466	1.77478e-10	6.61541e-10	8772
BRCA	FADD	MAIT	-0.0345337	0.228458	0.318032	8772
BRCA	FADD	Macrophage	0.192691	1.18812e-11	6.07252e-11	8772
BRCA	FADD	Monocyte	0.100148	0.000464648	0.00118471	8772
BRCA	FADD	NK	-0.0955945	0.000836395	0.0013924	8772
BRCA	FADD	NKT	-0.140221	8.97073e-07	2.20913e-06	8772
BRCA	FADD	Neutrophil	-0.0157916	0.581913	0.65122	8772
BRCA	FADD	Tfh	-0.0683279	0.0170804	0.026336	8772
BRCA	FADD	Th1	0.11782	3.7551e-05	9.0479e-05	8772
BRCA	FADD	Th17	-0.133825	2.77551e-06	6.37311e-06	8772
BRCA	FADD	Th2	-0.0433644	0.130389	0.200538	8772
BRCA	FADD	Tr1	0.0946454	0.000942524	0.00209673	8772
BRCA	FADD	iTreg	0.0370371	0.19646	0.244899	8772
BRCA	FADD	nTreg	-0.0166709	0.561069	0.629259	8772
BRCA	FAS	Bcell	0.0279049	0.330521	0.391822	355
BRCA	FAS	CD4_T	0.4146	8.64133e-52	1.92511e-50	355
BRCA	FAS	CD4_naive	-0.0924468	0.00123797	0.0286638	355
BRCA	FAS	CD8_T	0.205323	4.6344e-13	3.05572e-12	355
BRCA	FAS	CD8_naive	-0.302963	2.83632e-27	4.18316e-26	355
BRCA	FAS	Central_memory	0.347502	6.82229e-36	1.73947e-34	355
BRCA	FAS	Cytotoxic	0.463234	8.17448e-66	2.12462e-64	355
BRCA	FAS	DC	-0.0446429	0.119421	0.154883	355
BRCA	FAS	Effector_memory	-0.238488	3.26497e-17	3.88878e-16	355
BRCA	FAS	Exhausted	0.302458	3.48623e-27	4.75796e-26	355
BRCA	FAS	Gamma_delta	0.154359	6.16108e-08	2.05237e-07	355
BRCA	FAS	InfiltrationScore	0.244327	5.16607e-18	3.51101e-17	355
BRCA	FAS	MAIT	-0.00880652	0.758816	0.817627	355
BRCA	FAS	Macrophage	-0.0819553	0.00420837	0.00751062	355
BRCA	FAS	Monocyte	-0.249155	1.08403e-18	1.62985e-17	355
BRCA	FAS	NK	0.512297	1.84805e-82	7.48035e-81	355
BRCA	FAS	NKT	0.178759	3.32278e-10	1.10232e-09	355
BRCA	FAS	Neutrophil	-0.504456	1.29447e-79	3.95757e-78	355
BRCA	FAS	Tfh	0.477067	3.09147e-70	8.35901e-69	355
BRCA	FAS	Th1	0.30274	3.10726e-27	4.64748e-26	355
BRCA	FAS	Th17	-0.199338	2.21379e-12	8.29019e-12	355
BRCA	FAS	Th2	0.201911	1.13702e-12	1.66837e-11	355
BRCA	FAS	Tr1	-0.00763348	0.790133	0.833732	355
BRCA	FAS	iTreg	0.301652	4.84208e-27	5.54085e-26	355
BRCA	FAS	nTreg	-0.019871	0.488402	0.559999	355
BRCA	FASLG	Bcell	0.277058	6.66251e-23	1.06036e-21	356
BRCA	FASLG	CD4_T	0.379848	4.30369e-43	6.64957e-42	356
BRCA	FASLG	CD4_naive	-0.149435	1.61131e-07	4.9113e-05	356
BRCA	FASLG	CD8_T	0.641284	4.69692e-142	1.016e-139	356
BRCA	FASLG	CD8_naive	-0.445692	1.72105e-60	3.63432e-58	356
BRCA	FASLG	Central_memory	0.586399	2.10324e-113	3.15753e-111	356
BRCA	FASLG	Cytotoxic	0.81041	1.23257e-284	7.9986e-282	356
BRCA	FASLG	DC	-0.009962	0.728348	0.77198	356
BRCA	FASLG	Effector_memory	0.104329	0.000265034	0.000598661	356
BRCA	FASLG	Exhausted	0.553284	1.30395e-98	2.42885e-96	356
BRCA	FASLG	Gamma_delta	0.372519	2.18011e-41	2.03987e-39	356
BRCA	FASLG	InfiltrationScore	0.504401	1.35476e-79	8.13543e-78	356
BRCA	FASLG	MAIT	-0.143458	4.96787e-07	3.00206e-06	356
BRCA	FASLG	Macrophage	0.00515471	0.857376	0.883191	356
BRCA	FASLG	Monocyte	-0.445176	2.44165e-60	3.12857e-58	356
BRCA	FASLG	NK	0.664186	7.8593e-156	1.86007e-153	356
BRCA	FASLG	NKT	-0.143478	4.94952e-07	1.24742e-06	356
BRCA	FASLG	Neutrophil	-0.75686	7.6066e-227	1.37858e-224	356
BRCA	FASLG	Tfh	0.672489	3.92344e-161	3.83145e-159	356
BRCA	FASLG	Th1	0.789341	6.85134e-260	8.61428e-257	356
BRCA	FASLG	Th17	-0.554351	4.61769e-99	9.38325e-97	356
BRCA	FASLG	Th2	0.0772749	0.00697263	0.0160051	356
BRCA	FASLG	Tr1	0.103418	0.000300052	0.000727421	356
BRCA	FASLG	iTreg	0.6101	4.35988e-125	1.5122e-122	356
BRCA	FASLG	nTreg	0.168688	3.14867e-09	1.29137e-08	356
BRCA	MLKL	Bcell	0.225488	1.6628e-15	1.25801e-14	197259
BRCA	MLKL	CD4_T	0.274646	1.6127e-22	9.15428e-22	197259
BRCA	MLKL	CD4_naive	-0.0738111	0.00997004	0.129901	197259
BRCA	MLKL	CD8_T	0.286755	1.74012e-24	3.22339e-23	197259
BRCA	MLKL	CD8_naive	-0.473573	4.23141e-69	2.66011e-66	197259
BRCA	MLKL	Central_memory	0.258546	4.71631e-20	5.28863e-19	197259
BRCA	MLKL	Cytotoxic	0.616344	2.47818e-128	1.46198e-126	197259
BRCA	MLKL	DC	0.144756	3.90551e-07	1.02288e-06	197259
BRCA	MLKL	Effector_memory	0.0016342	0.954565	0.964926	197259
BRCA	MLKL	Exhausted	0.536018	1.55275e-91	2.09642e-89	197259
BRCA	MLKL	Gamma_delta	0.189982	2.31704e-11	1.12075e-10	197259
BRCA	MLKL	InfiltrationScore	0.485837	3.7965e-73	1.98375e-71	197259
BRCA	MLKL	MAIT	-0.113011	7.7278e-05	0.000289766	197259
BRCA	MLKL	Macrophage	0.103063	0.000314821	0.000666027	197259
BRCA	MLKL	Monocyte	-0.169349	2.72767e-09	1.53104e-08	197259
BRCA	MLKL	NK	0.516867	3.74654e-84	1.58007e-82	197259
BRCA	MLKL	NKT	0.0733284	0.0104682	0.0164086	197259
BRCA	MLKL	Neutrophil	-0.531001	1.48275e-89	5.1966e-88	197259
BRCA	MLKL	Tfh	0.431284	2.40296e-56	4.87794e-55	197259
BRCA	MLKL	Th1	0.537677	3.37982e-92	1.90988e-90	197259
BRCA	MLKL	Th17	-0.447238	6.01226e-61	2.95718e-59	197259
BRCA	MLKL	Th2	0.0701957	0.0142726	0.029946	197259
BRCA	MLKL	Tr1	0.00127868	0.964442	0.973198	197259
BRCA	MLKL	iTreg	0.367446	3.10938e-40	6.69715e-39	197259
BRCA	MLKL	nTreg	0.00970519	0.735084	0.78441	197259
BRCA	RIPK1	Bcell	-0.0571537	0.0461262	0.0667761	8737
BRCA	RIPK1	CD4_T	0.0871172	0.002342	0.00373594	8737
BRCA	RIPK1	CD4_naive	-0.0171009	0.551009	0.881623	8737
BRCA	RIPK1	CD8_T	-0.0109763	0.701951	0.758345	8737
BRCA	RIPK1	CD8_naive	-0.0692026	0.0157103	0.0256362	8737
BRCA	RIPK1	Central_memory	0.245872	3.14593e-18	3.02373e-17	8737
BRCA	RIPK1	Cytotoxic	0.100095	0.000467902	0.00090936	8737
BRCA	RIPK1	DC	-0.0534201	0.0623538	0.0853256	8737
BRCA	RIPK1	Effector_memory	-0.0425204	0.138047	0.187427	8737
BRCA	RIPK1	Exhausted	0.00716491	0.802741	0.8372	8737
BRCA	RIPK1	Gamma_delta	0.0816975	0.00432983	0.00774871	8737
BRCA	RIPK1	InfiltrationScore	-0.0290267	0.311443	0.372247	8737
BRCA	RIPK1	MAIT	-0.00733824	0.798071	0.848921	8737
BRCA	RIPK1	Macrophage	-0.0239161	0.404321	0.471274	8737
BRCA	RIPK1	Monocyte	-0.101819	0.000372146	0.000965122	8737
BRCA	RIPK1	NK	0.103069	0.000314547	0.000546626	8737
BRCA	RIPK1	NKT	0.0805915	0.004888	0.00800814	8737
BRCA	RIPK1	Neutrophil	-0.0770758	0.00712007	0.0129765	8737
BRCA	RIPK1	Tfh	0.0799965	0.00521445	0.00870026	8737
BRCA	RIPK1	Th1	0.0724396	0.0114434	0.0189783	8737
BRCA	RIPK1	Th17	0.0413251	0.149478	0.190019	8737
BRCA	RIPK1	Th2	-0.0661241	0.0210059	0.041835	8737
BRCA	RIPK1	Tr1	0.0397215	0.165931	0.226953	8737
BRCA	RIPK1	iTreg	0.110114	0.000117772	0.000237706	8737
BRCA	RIPK1	nTreg	0.0382638	0.182034	0.23889	8737
BRCA	RIPK3	Bcell	-0.132228	3.65042e-06	9.4976e-06	11035
BRCA	RIPK3	CD4_T	0.223262	3.18232e-15	1.21524e-14	11035
BRCA	RIPK3	CD4_naive	-0.00654042	0.819625	0.961774	11035
BRCA	RIPK3	CD8_T	0.144106	4.40657e-07	1.44635e-06	11035
BRCA	RIPK3	CD8_naive	0.0668286	0.0196733	0.0315001	11035
BRCA	RIPK3	Central_memory	0.14067	8.27159e-07	2.39286e-06	11035
BRCA	RIPK3	Cytotoxic	0.0701176	0.0143814	0.0226094	11035
BRCA	RIPK3	DC	-0.141771	6.77042e-07	1.72843e-06	11035
BRCA	RIPK3	Effector_memory	-0.0574311	0.0450772	0.0691225	11035
BRCA	RIPK3	Exhausted	-0.0195586	0.495267	0.556869	11035
BRCA	RIPK3	Gamma_delta	0.203543	7.41681e-13	4.2053e-12	11035
BRCA	RIPK3	InfiltrationScore	0.0617898	0.0310602	0.045835	11035
BRCA	RIPK3	MAIT	0.00687374	0.810602	0.858167	11035
BRCA	RIPK3	Macrophage	0.0339004	0.237109	0.296085	11035
BRCA	RIPK3	Monocyte	-0.151095	1.16924e-07	5.31203e-07	11035
BRCA	RIPK3	NK	0.173708	1.04338e-09	2.77019e-09	11035
BRCA	RIPK3	NKT	0.0877137	0.00218428	0.00374477	11035
BRCA	RIPK3	Neutrophil	-0.193868	8.86188e-12	4.49961e-11	11035
BRCA	RIPK3	Tfh	0.199718	2.00767e-12	8.24419e-12	11035
BRCA	RIPK3	Th1	-0.0164174	0.567041	0.632631	11035
BRCA	RIPK3	Th17	0.0936924	0.0010615	0.00185222	11035
BRCA	RIPK3	Th2	0.0131737	0.646013	0.731871	11035
BRCA	RIPK3	Tr1	-0.0270215	0.346064	0.427155	11035
BRCA	RIPK3	iTreg	-0.0788833	0.00587852	0.00962858	11035
BRCA	RIPK3	nTreg	-0.195446	5.96383e-12	3.32708e-11	11035
BRCA	TLR3	Bcell	-0.235483	8.27331e-17	7.14003e-16	7098
BRCA	TLR3	CD4_T	0.244183	5.41024e-18	2.39257e-17	7098
BRCA	TLR3	CD4_naive	-0.0653237	0.0226146	0.220736	7098
BRCA	TLR3	CD8_T	-0.0323401	0.259404	0.330343	7098
BRCA	TLR3	CD8_naive	-0.126808	9.03914e-06	2.3194e-05	7098
BRCA	TLR3	Central_memory	0.31763	5.9272e-30	1.18644e-28	7098
BRCA	TLR3	Cytotoxic	0.170824	1.97606e-09	6.76983e-09	7098
BRCA	TLR3	DC	-0.151234	1.13825e-07	3.1706e-07	7098
BRCA	TLR3	Effector_memory	-0.136567	1.72082e-06	5.26907e-06	7098
BRCA	TLR3	Exhausted	0.0177767	0.535379	0.595237	7098
BRCA	TLR3	Gamma_delta	0.112422	8.4263e-05	0.000191864	7098
BRCA	TLR3	InfiltrationScore	-0.0154768	0.589461	0.648308	7098
BRCA	TLR3	MAIT	0.055426	0.0531302	0.0933386	7098
BRCA	TLR3	Macrophage	0.00494417	0.863143	0.888131	7098
BRCA	TLR3	Monocyte	-0.177619	4.31429e-10	2.69118e-09	7098
BRCA	TLR3	NK	0.256694	8.84025e-20	4.23024e-19	7098
BRCA	TLR3	NKT	0.0930839	0.00114458	0.00203118	7098
BRCA	TLR3	Neutrophil	-0.189506	2.60273e-11	1.2724e-10	7098
BRCA	TLR3	Tfh	0.205753	4.13471e-13	1.77768e-12	7098
BRCA	TLR3	Th1	0.0569167	0.0470385	0.0697122	7098
BRCA	TLR3	Th17	0.125711	1.0812e-05	2.3397e-05	7098
BRCA	TLR3	Th2	0.0554611	0.0529795	0.0930251	7098
BRCA	TLR3	Tr1	-0.0548804	0.0555185	0.0863686	7098
BRCA	TLR3	iTreg	0.143954	4.53278e-07	1.17447e-06	7098
BRCA	TLR3	nTreg	0.00133498	0.962878	0.971181	7098
BRCA	TNF	Bcell	0.262285	1.30588e-20	1.65431e-19	7124
BRCA	TNF	CD4_T	0.192831	1.14757e-11	3.52508e-11	7124
BRCA	TNF	CD4_naive	-0.0386457	0.177707	0.631236	7124
BRCA	TNF	CD8_T	0.231559	2.73269e-16	2.54507e-15	7124
BRCA	TNF	CD8_naive	-0.313588	3.36226e-29	5.63656e-28	7124
BRCA	TNF	Central_memory	0.137212	1.53596e-06	4.30168e-06	7124
BRCA	TNF	Cytotoxic	0.323753	4.06393e-31	5.46485e-30	7124
BRCA	TNF	DC	0.126063	1.021e-05	2.2901e-05	7124
BRCA	TNF	Effector_memory	0.0749649	0.00886381	0.0155882	7124
BRCA	TNF	Exhausted	0.355717	1.21121e-37	2.82012e-36	7124
BRCA	TNF	Gamma_delta	0.046619	0.103905	0.142524	7124
BRCA	TNF	InfiltrationScore	0.372868	1.81169e-41	4.4446e-40	7124
BRCA	TNF	MAIT	-0.226294	1.31252e-15	4.80946e-14	7124
BRCA	TNF	Macrophage	0.0829857	0.00375291	0.00675894	7124
BRCA	TNF	Monocyte	-0.100364	0.000451562	0.00115485	7124
BRCA	TNF	NK	0.276125	9.38943e-23	5.22076e-22	7124
BRCA	TNF	NKT	-0.0158364	0.580842	0.639317	7124
BRCA	TNF	Neutrophil	-0.328643	4.56911e-32	6.219e-31	7124
BRCA	TNF	Tfh	0.250163	7.78909e-19	4.81244e-18	7124
BRCA	TNF	Th1	0.34824	4.77341e-36	1.01939e-34	7124
BRCA	TNF	Th17	-0.275552	1.1581e-22	8.85498e-22	7124
BRCA	TNF	Th2	0.106719	0.000190489	0.000648954	7124
BRCA	TNF	Tr1	0.039002	0.17374	0.236173	7124
BRCA	TNF	iTreg	0.350538	1.55914e-36	2.87226e-35	7124
BRCA	TNF	nTreg	0.112174	8.737e-05	0.000208349	7124
CESC	FADD	Bcell	-0.118172	0.0375703	0.111833	8772
CESC	FADD	CD4_T	-0.207898	0.000227818	0.00095367	8772
CESC	FADD	CD4_naive	-0.0667312	0.241404	0.518569	8772
CESC	FADD	CD8_T	-0.0354185	0.534414	0.668502	8772
CESC	FADD	CD8_naive	-0.185072	0.00106153	0.00360399	8772
CESC	FADD	Central_memory	-0.139723	0.0138079	0.0363024	8772
CESC	FADD	Cytotoxic	0.0343933	0.546317	0.669488	8772
CESC	FADD	DC	0.14145	0.0126678	0.0301193	8772
CESC	FADD	Effector_memory	0.146496	0.00979882	0.0568456	8772
CESC	FADD	Exhausted	0.0585148	0.304431	0.448233	8772
CESC	FADD	Gamma_delta	-0.0670377	0.239245	0.405473	8772
CESC	FADD	InfiltrationScore	0.101574	0.0741323	0.134631	8772
CESC	FADD	MAIT	-0.0121368	0.831455	0.912187	8772
CESC	FADD	Macrophage	0.10156	0.0741731	0.144664	8772
CESC	FADD	Monocyte	0.0666754	0.241799	0.480521	8772
CESC	FADD	NK	0.101843	0.0733663	0.161362	8772
CESC	FADD	NKT	0.0909481	0.110009	0.264057	8772
CESC	FADD	Neutrophil	0.0849614	0.135553	0.263852	8772
CESC	FADD	Tfh	-0.145395	0.0103702	0.0377111	8772
CESC	FADD	Th1	0.0842155	0.139032	0.256385	8772
CESC	FADD	Th17	-0.00564118	0.9212	0.95151	8772
CESC	FADD	Th2	0.0180461	0.751641	0.860315	8772
CESC	FADD	Tr1	-0.127545	0.0247193	0.0895468	8772
CESC	FADD	iTreg	-0.00275735	0.961436	0.974737	8772
CESC	FADD	nTreg	0.16679	0.00322497	0.0175973	8772
CESC	FAS	Bcell	-0.104082	0.067232	0.170787	355
CESC	FAS	CD4_T	0.159418	0.00490021	0.0135663	355
CESC	FAS	CD4_naive	-0.181165	0.00135817	0.0196664	355
CESC	FAS	CD8_T	0.215263	0.000133632	0.000873849	355
CESC	FAS	CD8_naive	-0.105523	0.0635105	0.115635	355
CESC	FAS	Central_memory	0.198252	0.00044575	0.00199232	355
CESC	FAS	Cytotoxic	0.298494	8.46597e-08	1.12189e-06	355
CESC	FAS	DC	0.0601858	0.290805	0.399672	355
CESC	FAS	Effector_memory	-0.0839961	0.140068	0.354728	355
CESC	FAS	Exhausted	0.218062	0.000108588	0.000837422	355
CESC	FAS	Gamma_delta	0.158315	0.00520935	0.0235259	355
CESC	FAS	InfiltrationScore	0.140723	0.0131369	0.0319391	355
CESC	FAS	MAIT	-0.0796068	0.162059	0.362332	355
CESC	FAS	Macrophage	0.0421521	0.459606	0.585734	355
CESC	FAS	Monocyte	-0.131789	0.0202789	0.104407	355
CESC	FAS	NK	0.222332	7.8716e-05	0.000646442	355
CESC	FAS	NKT	-0.0590591	0.299947	0.50398	355
CESC	FAS	Neutrophil	-0.331467	2.19767e-09	3.6022e-08	355
CESC	FAS	Tfh	0.262569	2.77482e-06	3.189e-05	355
CESC	FAS	Th1	0.231187	3.9595e-05	0.000411954	355
CESC	FAS	Th17	-0.0989591	0.0819312	0.169763	355
CESC	FAS	Th2	0.0911781	0.109109	0.254237	355
CESC	FAS	Tr1	0.0441796	0.438281	0.626007	355
CESC	FAS	iTreg	0.330975	2.32837e-09	4.83493e-08	355
CESC	FAS	nTreg	0.103426	0.0689826	0.167124	355
CESC	FASLG	Bcell	0.126681	0.025719	0.0847226	356
CESC	FASLG	CD4_T	0.103768	0.068066	0.124269	356
CESC	FASLG	CD4_naive	-0.420812	9.81216e-15	1.58737e-11	356
CESC	FASLG	CD8_T	0.718018	2.12884e-50	6.35378e-48	356
CESC	FASLG	CD8_naive	-0.45135	5.77898e-17	1.39232e-14	356
CESC	FASLG	Central_memory	0.325124	4.59307e-09	9.46883e-08	356
CESC	FASLG	Cytotoxic	0.794625	1.00126e-68	4.35265e-66	356
CESC	FASLG	DC	0.166903	0.0032039	0.00931903	356
CESC	FASLG	Effector_memory	-0.0621437	0.275367	0.52707	356
CESC	FASLG	Exhausted	0.688158	8.04666e-45	1.46281e-41	356
CESC	FASLG	Gamma_delta	0.469009	2.3253e-18	1.85996e-15	356
CESC	FASLG	InfiltrationScore	0.531308	5.55669e-24	2.96312e-22	356
CESC	FASLG	MAIT	-0.107678	0.0582636	0.191125	356
CESC	FASLG	Macrophage	0.327906	3.33149e-09	7.74648e-08	356
CESC	FASLG	Monocyte	-0.331336	2.23184e-09	2.81053e-07	356
CESC	FASLG	NK	0.606544	1.56164e-32	8.21792e-30	356
CESC	FASLG	NKT	-0.307174	3.37963e-08	6.62572e-06	356
CESC	FASLG	Neutrophil	-0.672522	3.67474e-42	3.65591e-40	356
CESC	FASLG	Tfh	0.604063	3.25357e-32	2.87884e-30	356
CESC	FASLG	Th1	0.741792	2.20173e-55	5.50349e-52	356
CESC	FASLG	Th17	-0.501197	4.03385e-21	5.07326e-19	356
CESC	FASLG	Th2	0.186479	0.000970246	0.0107016	356
CESC	FASLG	Tr1	0.176714	0.0017876	0.0121175	356
CESC	FASLG	iTreg	0.549829	6.88281e-26	2.5969e-23	356
CESC	FASLG	nTreg	-0.0783549	0.168783	0.316708	356
CESC	MLKL	Bcell	0.0793754	0.163287	0.320499	197259
CESC	MLKL	CD4_T	-0.0303307	0.594731	0.694269	197259
CESC	MLKL	CD4_naive	-0.197221	0.000478042	0.00896014	197259
CESC	MLKL	CD8_T	0.308047	3.07625e-08	5.18246e-07	197259
CESC	MLKL	CD8_naive	-0.463974	5.92415e-18	1.91073e-15	197259
CESC	MLKL	Central_memory	0.148636	0.00876685	0.0249021	197259
CESC	MLKL	Cytotoxic	0.481712	2.04927e-19	6.92216e-18	197259
CESC	MLKL	DC	0.149436	0.00840701	0.0212642	197259
CESC	MLKL	Effector_memory	-0.0261733	0.646201	0.825534	197259
CESC	MLKL	Exhausted	0.378714	5.21134e-12	1.73685e-10	197259
CESC	MLKL	Gamma_delta	0.183251	0.00119143	0.00746632	197259
CESC	MLKL	InfiltrationScore	0.405716	1.03173e-13	2.6794e-12	197259
CESC	MLKL	MAIT	-0.0184791	0.745884	0.86302	197259
CESC	MLKL	Macrophage	0.283867	3.72037e-07	4.87524e-06	197259
CESC	MLKL	Monocyte	-0.0880618	0.121807	0.321894	197259
CESC	MLKL	NK	0.402604	1.65146e-13	9.76617e-12	197259
CESC	MLKL	NKT	-0.0492973	0.387045	0.588672	197259
CESC	MLKL	Neutrophil	-0.278717	6.14325e-07	7.16724e-06	197259
CESC	MLKL	Tfh	0.263119	2.64016e-06	3.0518e-05	197259
CESC	MLKL	Th1	0.421135	9.31852e-15	3.9902e-13	197259
CESC	MLKL	Th17	-0.211555	0.000175209	0.00126167	197259
CESC	MLKL	Th2	0.069776	0.220551	0.404138	197259
CESC	MLKL	Tr1	0.0857093	0.132133	0.290455	197259
CESC	MLKL	iTreg	0.255577	5.17316e-06	4.3484e-05	197259
CESC	MLKL	nTreg	0.0417085	0.464348	0.628082	197259
CESC	RIPK1	Bcell	0.0453663	0.426067	0.606626	8737
CESC	RIPK1	CD4_T	0.105636	0.0632247	0.116806	8737
CESC	RIPK1	CD4_naive	-0.0503592	0.376888	0.64967	8737
CESC	RIPK1	CD8_T	0.102597	0.0712527	0.150889	8737
CESC	RIPK1	CD8_naive	-0.181337	0.00134359	0.00441074	8737
CESC	RIPK1	Central_memory	0.264199	2.3935e-06	2.2814e-05	8737
CESC	RIPK1	Cytotoxic	0.1523	0.0072233	0.0225307	8737
CESC	RIPK1	DC	0.0548741	0.335557	0.446836	8737
CESC	RIPK1	Effector_memory	0.0241109	0.672395	0.840369	8737
CESC	RIPK1	Exhausted	0.00284689	0.960184	0.975273	8737
CESC	RIPK1	Gamma_delta	0.00489851	0.931546	0.962846	8737
CESC	RIPK1	InfiltrationScore	0.0348831	0.540613	0.647809	8737
CESC	RIPK1	MAIT	0.0589449	0.300884	0.524246	8737
CESC	RIPK1	Macrophage	0.0168006	0.768277	0.83895	8737
CESC	RIPK1	Monocyte	-0.160155	0.00470314	0.0391751	8737
CESC	RIPK1	NK	0.0205519	0.718526	0.82119	8737
CESC	RIPK1	NKT	0.00498344	0.930363	0.964367	8737
CESC	RIPK1	Neutrophil	-0.108088	0.0573067	0.13953	8737
CESC	RIPK1	Tfh	0.201489	0.000357089	0.00229383	8737
CESC	RIPK1	Th1	0.171129	0.00250121	0.0117992	8737
CESC	RIPK1	Th17	-0.029525	0.604561	0.725611	8737
CESC	RIPK1	Th2	-0.0945463	0.0965811	0.235552	8737
CESC	RIPK1	Tr1	0.139199	0.0141709	0.059408	8737
CESC	RIPK1	iTreg	0.234295	3.0909e-05	0.000200811	8737
CESC	RIPK1	nTreg	0.0125276	0.826113	0.896207	8737
CESC	RIPK3	Bcell	0.0930794	0.101889	0.230313	11035
CESC	RIPK3	CD4_T	0.132535	0.0195744	0.0439216	11035
CESC	RIPK3	CD4_naive	-0.0876662	0.123498	0.360578	11035
CESC	RIPK3	CD8_T	0.170583	0.00258335	0.0103838	11035
CESC	RIPK3	CD8_naive	-0.0156488	0.783755	0.841264	11035
CESC	RIPK3	Central_memory	0.228925	4.7313e-05	0.000297238	11035
CESC	RIPK3	Cytotoxic	0.126053	0.0264676	0.064357	11035
CESC	RIPK3	DC	-0.0399739	0.483147	0.592584	11035
CESC	RIPK3	Effector_memory	0.108913	0.055421	0.193954	11035
CESC	RIPK3	Exhausted	0.0836833	0.141555	0.252154	11035
CESC	RIPK3	Gamma_delta	0.0593594	0.297492	0.470193	11035
CESC	RIPK3	InfiltrationScore	0.00487132	0.931926	0.955286	11035
CESC	RIPK3	MAIT	-0.047421	0.405393	0.621789	11035
CESC	RIPK3	Macrophage	-0.0667142	0.241525	0.363852	11035
CESC	RIPK3	Monocyte	-0.113076	0.0466744	0.17812	11035
CESC	RIPK3	NK	0.0208427	0.714715	0.818566	11035
CESC	RIPK3	NKT	-0.0747136	0.189524	0.376543	11035
CESC	RIPK3	Neutrophil	-0.188574	0.000847594	0.00458498	11035
CESC	RIPK3	Tfh	0.224504	6.6671e-05	0.000539112	11035
CESC	RIPK3	Th1	0.0725954	0.202418	0.338606	11035
CESC	RIPK3	Th17	0.00491811	0.931273	0.95771	11035
CESC	RIPK3	Th2	-0.114615	0.043747	0.138095	11035
CESC	RIPK3	Tr1	0.0471308	0.408276	0.601244	11035
CESC	RIPK3	iTreg	0.093242	0.10129	0.181122	11035
CESC	RIPK3	nTreg	0.0435086	0.445276	0.611551	11035
CESC	TLR3	Bcell	0.00150343	0.978967	0.989107	7098
CESC	TLR3	CD4_T	0.139472	0.0139803	0.0331414	7098
CESC	TLR3	CD4_naive	-0.158667	0.00510883	0.0508817	7098
CESC	TLR3	CD8_T	0.224686	6.575e-05	0.000481611	7098
CESC	TLR3	CD8_naive	-0.0424523	0.456413	0.565168	7098
CESC	TLR3	Central_memory	0.287277	2.65418e-07	3.39358e-06	7098
CESC	TLR3	Cytotoxic	0.252828	6.57683e-06	5.6518e-05	7098
CESC	TLR3	DC	-0.0849167	0.13576	0.21694	7098
CESC	TLR3	Effector_memory	0.107101	0.0596302	0.203451	7098
CESC	TLR3	Exhausted	0.163432	0.00391016	0.015462	7098
CESC	TLR3	Gamma_delta	0.177396	0.00171459	0.00989231	7098
CESC	TLR3	InfiltrationScore	0.0147825	0.795453	0.85575	7098
CESC	TLR3	MAIT	-0.133823	0.0184092	0.0901833	7098
CESC	TLR3	Macrophage	-0.0501791	0.378599	0.508486	7098
CESC	TLR3	Monocyte	-0.13673	0.0159974	0.0888363	7098
CESC	TLR3	NK	0.10175	0.0736319	0.16184	7098
CESC	TLR3	NKT	-0.194902	0.000558727	0.00688832	7098
CESC	TLR3	Neutrophil	-0.251354	7.47149e-06	7.1388e-05	7098
CESC	TLR3	Tfh	0.268866	1.55919e-06	1.9056e-05	7098
CESC	TLR3	Th1	0.229546	4.5064e-05	0.000460237	7098
CESC	TLR3	Th17	-0.0999024	0.0790453	0.16528	7098
CESC	TLR3	Th2	-0.0961002	0.0912011	0.22706	7098
CESC	TLR3	Tr1	0.00599106	0.91633	0.956759	7098
CESC	TLR3	iTreg	0.352993	1.58382e-10	4.22916e-09	7098
CESC	TLR3	nTreg	0.109685	0.053702	0.139683	7098
CESC	TNF	Bcell	-0.0291469	0.609198	0.755955	7124
CESC	TNF	CD4_T	-0.0905306	0.111658	0.186754	7124
CESC	TNF	CD4_naive	-0.0504711	0.375828	0.648497	7124
CESC	TNF	CD8_T	0.098957	0.0819379	0.168234	7124
CESC	TNF	CD8_naive	-0.279905	5.47716e-07	5.19084e-06	7124
CESC	TNF	Central_memory	-0.0159083	0.780259	0.853055	7124
CESC	TNF	Cytotoxic	0.263549	2.5393e-06	2.4542e-05	7124
CESC	TNF	DC	0.166541	0.00327175	0.00947779	7124
CESC	TNF	Effector_memory	-0.0522826	0.358912	0.611821	7124
CESC	TNF	Exhausted	0.262319	2.83833e-06	3.7991e-05	7124
CESC	TNF	Gamma_delta	-0.00964233	0.865727	0.924181	7124
CESC	TNF	InfiltrationScore	0.212597	0.000162443	0.000730804	7124
CESC	TNF	MAIT	0.0580688	0.308138	0.531927	7124
CESC	TNF	Macrophage	0.129854	0.0222093	0.0546541	7124
CESC	TNF	Monocyte	0.00180594	0.974737	0.988428	7124
CESC	TNF	NK	0.185445	0.00103659	0.00543062	7124
CESC	TNF	NKT	0.0562535	0.323532	0.527184	7124
CESC	TNF	Neutrophil	-0.0915737	0.107575	0.222758	7124
CESC	TNF	Tfh	0.0909519	0.109994	0.230489	7124
CESC	TNF	Th1	0.265581	2.1101e-06	3.3595e-05	7124
CESC	TNF	Th17	-0.07405	0.193497	0.322877	7124
CESC	TNF	Th2	0.0819831	0.149852	0.313417	7124
CESC	TNF	Tr1	0.0712468	0.210952	0.395743	7124
CESC	TNF	iTreg	0.189607	0.000792586	0.00320513	7124
CESC	TNF	nTreg	0.0542392	0.341187	0.513759	7124
CHOL	FADD	Bcell	0.191552	0.20748	0.336181	8772
CHOL	FADD	CD4_T	0.190009	0.211236	0.469798	8772
CHOL	FADD	CD4_naive	-0.00217328	0.988696	0.997581	8772
CHOL	FADD	CD8_T	0.171905	0.258833	0.770196	8772
CHOL	FADD	CD8_naive	0.190305	0.210512	0.331685	8772
CHOL	FADD	Central_memory	0.202589	0.18199	0.637961	8772
CHOL	FADD	Cytotoxic	0.125519	0.411322	0.813722	8772
CHOL	FADD	DC	0.296255	0.0481523	0.251794	8772
CHOL	FADD	Effector_memory	0.135051	0.376415	0.578527	8772
CHOL	FADD	Exhausted	-0.070517	0.645298	0.978048	8772
CHOL	FADD	Gamma_delta	-0.126592	0.407304	0.75734	8772
CHOL	FADD	InfiltrationScore	0.207201	0.172031	0.329425	8772
CHOL	FADD	MAIT	0.0299216	0.845303	0.911309	8772
CHOL	FADD	Macrophage	0.00158118	0.991775	0.995239	8772
CHOL	FADD	Monocyte	-0.306207	0.0407833	0.110705	8772
CHOL	FADD	NK	0.0249053	0.870996	0.927644	8772
CHOL	FADD	NKT	0.147137	0.334789	0.682788	8772
CHOL	FADD	Neutrophil	-0.236853	0.117225	0.521773	8772
CHOL	FADD	Tfh	0.0922134	0.546865	0.71406	8772
CHOL	FADD	Th1	0.169906	0.264497	0.561747	8772
CHOL	FADD	Th17	-0.276839	0.0656218	0.140646	8772
CHOL	FADD	Th2	0.0866528	0.571398	0.943611	8772
CHOL	FADD	Tr1	0.17794	0.24223	0.434306	8772
CHOL	FADD	iTreg	0.194034	0.201541	0.584358	8772
CHOL	FADD	nTreg	0.379047	0.0102352	0.0382541	8772
CHOL	FAS	Bcell	-0.378031	0.010457	0.0491311	355
CHOL	FAS	CD4_T	0.0715745	0.640339	0.810421	355
CHOL	FAS	CD4_naive	-0.395778	0.00712141	0.441361	355
CHOL	FAS	CD8_T	0.113461	0.458024	0.874508	355
CHOL	FAS	CD8_naive	-0.406684	0.00556637	0.0302685	355
CHOL	FAS	Central_memory	0.318087	0.0332212	0.298258	355
CHOL	FAS	Cytotoxic	0.303354	0.0427949	0.365403	355
CHOL	FAS	DC	-0.166343	0.274793	0.564318	355
CHOL	FAS	Effector_memory	-0.388876	0.00828906	0.0649298	355
CHOL	FAS	Exhausted	0.138129	0.365535	0.960737	355
CHOL	FAS	Gamma_delta	0.149247	0.327826	0.704944	355
CHOL	FAS	InfiltrationScore	0.290279	0.0530724	0.152027	355
CHOL	FAS	MAIT	0.281619	0.0609133	0.207462	355
CHOL	FAS	Macrophage	0.440162	0.00248035	0.0159133	355
CHOL	FAS	Monocyte	0.157222	0.302339	0.43539	355
CHOL	FAS	NK	0.262889	0.0810331	0.222434	355
CHOL	FAS	NKT	-0.181715	0.232222	0.604812	355
CHOL	FAS	Neutrophil	-0.236918	0.11712	0.521674	355
CHOL	FAS	Tfh	0.464035	0.00132383	0.0179475	355
CHOL	FAS	Th1	0.375848	0.0109477	0.154981	355
CHOL	FAS	Th17	0.328162	0.0277522	0.0773088	355
CHOL	FAS	Th2	0.0906725	0.553613	0.941205	355
CHOL	FAS	Tr1	0.0839926	0.583311	0.73208	355
CHOL	FAS	iTreg	0.165615	0.276929	0.656643	355
CHOL	FAS	nTreg	-0.360697	0.0149287	0.0488194	355
CHOL	FASLG	Bcell	0.106945	0.484407	0.611725	356
CHOL	FASLG	CD4_T	0.391749	0.00778446	0.0915577	356
CHOL	FASLG	CD4_naive	-0.423306	0.00376395	0.441361	356
CHOL	FASLG	CD8_T	0.709363	4.90594e-08	4.7893e-05	356
CHOL	FASLG	CD8_naive	-0.287752	0.0552715	0.12741	356
CHOL	FASLG	Central_memory	0.541349	0.000123052	0.00635966	356
CHOL	FASLG	Cytotoxic	0.769849	6.36456e-10	3.45383e-07	356
CHOL	FASLG	DC	0.0282618	0.853788	0.941499	356
CHOL	FASLG	Effector_memory	-0.0224166	0.883794	0.939022	356
CHOL	FASLG	Exhausted	0.400957	0.00634142	0.619399	356
CHOL	FASLG	Gamma_delta	0.470397	0.00111125	0.28194	356
CHOL	FASLG	InfiltrationScore	0.43028	0.0031755	0.0277445	356
CHOL	FASLG	MAIT	0.0231332	0.880106	0.93186	356
CHOL	FASLG	Macrophage	0.157591	0.30119	0.44241	356
CHOL	FASLG	Monocyte	-0.457433	0.001582	0.0167902	356
CHOL	FASLG	NK	0.687267	1.84512e-07	0.000171649	356
CHOL	FASLG	NKT	0.0149327	0.922442	0.972623	356
CHOL	FASLG	Neutrophil	-0.71985	2.50507e-08	3.32919e-06	356
CHOL	FASLG	Tfh	0.678804	2.9739e-07	1.8986e-05	356
CHOL	FASLG	Th1	0.761117	1.28792e-09	1.95288e-06	356
CHOL	FASLG	Th17	-0.395691	0.00713519	0.0313032	356
CHOL	FASLG	Th2	-0.0580541	0.704837	0.959862	356
CHOL	FASLG	Tr1	0.329905	0.0268863	0.118034	356
CHOL	FASLG	iTreg	0.454778	0.0016978	0.117618	356
CHOL	FASLG	nTreg	0.211119	0.163885	0.277657	356
CHOL	MLKL	Bcell	0.36538	0.0135846	0.0567675	197259
CHOL	MLKL	CD4_T	0.448955	0.0019785	0.0412948	197259
CHOL	MLKL	CD4_naive	-0.186298	0.220454	0.69961	197259
CHOL	MLKL	CD8_T	0.274626	0.0678975	0.522986	197259
CHOL	MLKL	CD8_naive	0.326265	0.0287203	0.0817661	197259
CHOL	MLKL	Central_memory	0.27921	0.0632512	0.413408	197259
CHOL	MLKL	Cytotoxic	0.276471	0.065996	0.440936	197259
CHOL	MLKL	DC	0.17102	0.26133	0.551392	197259
CHOL	MLKL	Effector_memory	0.168711	0.267921	0.475655	197259
CHOL	MLKL	Exhausted	0.168911	0.267345	0.958628	197259
CHOL	MLKL	Gamma_delta	0.109435	0.474235	0.793275	197259
CHOL	MLKL	InfiltrationScore	-0.252265	0.0945671	0.221386	197259
CHOL	MLKL	MAIT	-0.425559	0.00356423	0.0621149	197259
CHOL	MLKL	Macrophage	-0.367625	0.0129774	0.0477451	197259
CHOL	MLKL	Monocyte	-0.580851	2.8734e-05	0.00219841	197259
CHOL	MLKL	NK	-0.109307	0.474756	0.652513	197259
CHOL	MLKL	NKT	0.130213	0.393906	0.723519	197259
CHOL	MLKL	Neutrophil	-0.499934	0.000471018	0.0116923	197259
CHOL	MLKL	Tfh	0.0808681	0.597443	0.752913	197259
CHOL	MLKL	Th1	0.10251	0.502809	0.74247	197259
CHOL	MLKL	Th17	-0.459136	0.00151144	0.0122878	197259
CHOL	MLKL	Th2	0.105763	0.489279	0.924337	197259
CHOL	MLKL	Tr1	0.458597	0.00153346	0.0225415	197259
CHOL	MLKL	iTreg	0.372633	0.0117062	0.235217	197259
CHOL	MLKL	nTreg	0.407399	0.00547561	0.0256588	197259
CHOL	RIPK1	Bcell	-0.0846732	0.580253	0.694129	8737
CHOL	RIPK1	CD4_T	-0.114348	0.454495	0.686221	8737
CHOL	RIPK1	CD4_naive	0.0744952	0.626724	0.886003	8737
CHOL	RIPK1	CD8_T	-0.0412466	0.787915	0.961203	8737
CHOL	RIPK1	CD8_naive	-0.145539	0.340123	0.47065	8737
CHOL	RIPK1	Central_memory	-0.0886243	0.562642	0.889547	8737
CHOL	RIPK1	Cytotoxic	-0.137379	0.368168	0.791432	8737
CHOL	RIPK1	DC	-0.232353	0.124559	0.38857	8737
CHOL	RIPK1	Effector_memory	-0.322385	0.0307881	0.134019	8737
CHOL	RIPK1	Exhausted	-0.038164	0.80344	0.988911	8737
CHOL	RIPK1	Gamma_delta	0.182634	0.229828	0.62598	8737
CHOL	RIPK1	InfiltrationScore	0.264519	0.0790986	0.197479	8737
CHOL	RIPK1	MAIT	0.064852	0.672117	0.799323	8737
CHOL	RIPK1	Macrophage	0.163191	0.284117	0.424514	8737
CHOL	RIPK1	Monocyte	0.457037	0.00159879	0.0168559	8737
CHOL	RIPK1	NK	0.0947455	0.535862	0.700241	8737
CHOL	RIPK1	NKT	0.105259	0.491361	0.78219	8737
CHOL	RIPK1	Neutrophil	0.159352	0.295754	0.744761	8737
CHOL	RIPK1	Tfh	0.164704	0.279615	0.475667	8737
CHOL	RIPK1	Th1	-0.102708	0.501982	0.742034	8737
CHOL	RIPK1	Th17	0.25938	0.0853241	0.170873	8737
CHOL	RIPK1	Th2	0.0148265	0.922992	0.992335	8737
CHOL	RIPK1	Tr1	-0.245583	0.103934	0.263244	8737
CHOL	RIPK1	iTreg	-0.258028	0.087024	0.454208	8737
CHOL	RIPK1	nTreg	-0.332809	0.0254944	0.0709182	8737
CHOL	RIPK3	Bcell	0.269175	0.0737708	0.164107	11035
CHOL	RIPK3	CD4_T	0.380281	0.00997109	0.105408	11035
CHOL	RIPK3	CD4_naive	0.221433	0.143787	0.635867	11035
CHOL	RIPK3	CD8_T	0.150359	0.324194	0.815432	11035
CHOL	RIPK3	CD8_naive	0.265003	0.078531	0.163489	11035
CHOL	RIPK3	Central_memory	0.351096	0.0180408	0.216357	11035
CHOL	RIPK3	Cytotoxic	0.0911247	0.551628	0.878719	11035
CHOL	RIPK3	DC	0.00625844	0.967454	0.986903	11035
CHOL	RIPK3	Effector_memory	0.0968397	0.526845	0.704286	11035
CHOL	RIPK3	Exhausted	0.193961	0.201715	0.935723	11035
CHOL	RIPK3	Gamma_delta	-0.25272	0.0939537	0.501151	11035
CHOL	RIPK3	InfiltrationScore	-0.336529	0.0237993	0.091868	11035
CHOL	RIPK3	MAIT	-0.132209	0.386636	0.573518	11035
CHOL	RIPK3	Macrophage	-0.411305	0.00500228	0.0253238	11035
CHOL	RIPK3	Monocyte	-0.454402	0.00171482	0.0174211	11035
CHOL	RIPK3	NK	-0.129534	0.3964	0.586361	11035
CHOL	RIPK3	NKT	0.167578	0.271193	0.639472	11035
CHOL	RIPK3	Neutrophil	-0.286806	0.0561126	0.363226	11035
CHOL	RIPK3	Tfh	0.0499324	0.744625	0.852596	11035
CHOL	RIPK3	Th1	0.0457869	0.765198	0.889022	11035
CHOL	RIPK3	Th17	-0.339296	0.0226006	0.0672544	11035
CHOL	RIPK3	Th2	-0.0281375	0.854424	0.984977	11035
CHOL	RIPK3	Tr1	0.407305	0.00548746	0.0480947	11035
CHOL	RIPK3	iTreg	0.294529	0.0495333	0.372903	11035
CHOL	RIPK3	nTreg	0.360101	0.0151077	0.0492235	11035
CHOL	TLR3	Bcell	-0.351081	0.0180463	0.0666074	7098
CHOL	TLR3	CD4_T	0.0452778	0.767736	0.886122	7098
CHOL	TLR3	CD4_naive	-0.261639	0.0825425	0.577962	7098
CHOL	TLR3	CD8_T	0.0888186	0.561783	0.907671	7098
CHOL	TLR3	CD8_naive	-0.109287	0.474835	0.599908	7098
CHOL	TLR3	Central_memory	0.17038	0.263145	0.711925	7098
CHOL	TLR3	Cytotoxic	0.267708	0.0754183	0.469526	7098
CHOL	TLR3	DC	-0.00401858	0.979099	0.992176	7098
CHOL	TLR3	Effector_memory	0.123257	0.41987	0.616272	7098
CHOL	TLR3	Exhausted	0.191841	0.206784	0.935723	7098
CHOL	TLR3	Gamma_delta	0.00125863	0.993453	0.997179	7098
CHOL	TLR3	InfiltrationScore	-0.00744474	0.961289	0.977806	7098
CHOL	TLR3	MAIT	0.136954	0.369666	0.558605	7098
CHOL	TLR3	Macrophage	0.167013	0.272838	0.412487	7098
CHOL	TLR3	Monocyte	-0.00553506	0.971214	0.98131	7098
CHOL	TLR3	NK	0.202273	0.182687	0.363254	7098
CHOL	TLR3	NKT	0.0333829	0.827664	0.935666	7098
CHOL	TLR3	Neutrophil	-0.183999	0.226305	0.684062	7098
CHOL	TLR3	Tfh	0.248079	0.100355	0.254847	7098
CHOL	TLR3	Th1	0.307991	0.0395652	0.264526	7098
CHOL	TLR3	Th17	0.0820239	0.592198	0.696855	7098
CHOL	TLR3	Th2	0.141412	0.354137	0.875201	7098
CHOL	TLR3	Tr1	0.147218	0.33452	0.525463	7098
CHOL	TLR3	iTreg	0.245309	0.104333	0.481821	7098
CHOL	TLR3	nTreg	0.0170246	0.911617	0.941646	7098
CHOL	TNF	Bcell	0.23043	0.127797	0.239762	7124
CHOL	TNF	CD4_T	0.383049	0.00939999	0.10242	7124
CHOL	TNF	CD4_naive	0.0188351	0.902262	0.971162	7124
CHOL	TNF	CD8_T	0.265863	0.0775307	0.544639	7124
CHOL	TNF	CD8_naive	0.157246	0.302265	0.432256	7124
CHOL	TNF	Central_memory	0.244134	0.106057	0.516175	7124
CHOL	TNF	Cytotoxic	0.319694	0.0322935	0.316075	7124
CHOL	TNF	DC	0.289272	0.0539402	0.264436	7124
CHOL	TNF	Effector_memory	-0.0517306	0.735755	0.853292	7124
CHOL	TNF	Exhausted	0.220582	0.145373	0.913495	7124
CHOL	TNF	Gamma_delta	-0.136263	0.372107	0.734588	7124
CHOL	TNF	InfiltrationScore	0.194222	0.201097	0.364369	7124
CHOL	TNF	MAIT	0.0760562	0.619497	0.762266	7124
CHOL	TNF	Macrophage	-0.0471061	0.758633	0.837278	7124
CHOL	TNF	Monocyte	-0.422707	0.00381874	0.0265302	7124
CHOL	TNF	NK	0.197859	0.192626	0.3759	7124
CHOL	TNF	NKT	0.369601	0.0124624	0.242193	7124
CHOL	TNF	Neutrophil	-0.341703	0.0215993	0.206946	7124
CHOL	TNF	Tfh	0.312787	0.0364382	0.143635	7124
CHOL	TNF	Th1	0.198169	0.191916	0.490485	7124
CHOL	TNF	Th17	-0.446289	0.0021202	0.014985	7124
CHOL	TNF	Th2	0.228065	0.131864	0.775699	7124
CHOL	TNF	Tr1	0.461432	0.00142076	0.0214002	7124
CHOL	TNF	iTreg	0.15793	0.300138	0.676454	7124
CHOL	TNF	nTreg	0.100492	0.5113	0.6318	7124
COAD	FADD	Bcell	-0.0470362	0.395112	0.488027	8772
COAD	FADD	CD4_T	-0.131261	0.0172141	0.0282788	8772
COAD	FADD	CD4_naive	-0.00108578	0.984347	0.994225	8772
COAD	FADD	CD8_T	0.189016	0.000567889	0.00233788	8772
COAD	FADD	CD8_naive	-0.134234	0.0148279	0.0320173	8772
COAD	FADD	Central_memory	-0.0992372	0.0722422	0.177338	8772
COAD	FADD	Cytotoxic	0.15613	0.00453124	0.0100567	8772
COAD	FADD	DC	0.0211372	0.702478	0.792661	8772
COAD	FADD	Effector_memory	0.245571	6.59097e-06	6.5702e-05	8772
COAD	FADD	Exhausted	0.158808	0.00387811	0.01071	8772
COAD	FADD	Gamma_delta	0.0423473	0.443956	0.573614	8772
COAD	FADD	InfiltrationScore	0.0673884	0.222826	0.289858	8772
COAD	FADD	MAIT	-0.0125807	0.820164	0.858167	8772
COAD	FADD	Macrophage	-0.00174741	0.974811	0.982755	8772
COAD	FADD	Monocyte	-0.100291	0.0692515	0.111873	8772
COAD	FADD	NK	0.138049	0.0121948	0.0201949	8772
COAD	FADD	NKT	0.0221882	0.688438	0.759983	8772
COAD	FADD	Neutrophil	0.0346078	0.531625	0.627199	8772
COAD	FADD	Tfh	-0.00162211	0.976617	0.983232	8772
COAD	FADD	Th1	0.193196	0.000424806	0.00252638	8772
COAD	FADD	Th17	-0.103069	0.0618511	0.116478	8772
COAD	FADD	Th2	0.0593229	0.28333	0.348898	8772
COAD	FADD	Tr1	-0.0876337	0.112618	0.188141	8772
COAD	FADD	iTreg	-0.0395895	0.474217	0.587776	8772
COAD	FADD	nTreg	0.148083	0.00713203	0.0129382	8772
COAD	FAS	Bcell	0.214825	8.5765e-05	0.000296455	355
COAD	FAS	CD4_T	0.286239	1.2702e-07	4.31717e-07	355
COAD	FAS	CD4_naive	-0.105087	0.0568932	0.599957	355
COAD	FAS	CD8_T	0.439902	5.29935e-17	2.67208e-15	355
COAD	FAS	CD8_naive	-0.451507	6.25992e-18	1.48427e-15	355
COAD	FAS	Central_memory	0.219798	5.7982e-05	0.000607483	355
COAD	FAS	Cytotoxic	0.445472	1.92039e-17	4.14393e-16	355
COAD	FAS	DC	0.0653028	0.237508	0.35876	355
COAD	FAS	Effector_memory	0.20749	0.000150326	0.000921525	355
COAD	FAS	Exhausted	0.0138143	0.802876	0.862693	355
COAD	FAS	Gamma_delta	-0.196152	0.000344694	0.00161536	355
COAD	FAS	InfiltrationScore	0.425384	6.85329e-16	5.64037e-15	355
COAD	FAS	MAIT	0.45438	3.64223e-18	1.88912e-16	355
COAD	FAS	Macrophage	0.195737	0.00035502	0.00134199	355
COAD	FAS	Monocyte	-0.367765	5.65204e-12	1.35956e-10	355
COAD	FAS	NK	0.561774	9.25027e-29	4.43946e-27	355
COAD	FAS	NKT	0.0525504	0.342007	0.437493	355
COAD	FAS	Neutrophil	-0.432859	1.86295e-16	2.90104e-15	355
COAD	FAS	Tfh	0.509463	3.94306e-23	1.76481e-21	355
COAD	FAS	Th1	0.201503	0.000234305	0.00154117	355
COAD	FAS	Th17	0.206061	0.000167317	0.000741038	355
COAD	FAS	Th2	0.433679	1.61157e-16	1.86181e-15	355
COAD	FAS	Tr1	0.145093	0.00839668	0.0203105	355
COAD	FAS	iTreg	0.0603079	0.275398	0.386886	355
COAD	FAS	nTreg	-0.132179	0.0164439	0.0278142	355
COAD	FASLG	Bcell	0.1282	0.0200132	0.0375687	356
COAD	FASLG	CD4_T	0.248975	4.85438e-06	1.3564e-05	356
COAD	FASLG	CD4_naive	-0.137502	0.0125449	0.553686	356
COAD	FASLG	CD8_T	0.702994	2.49172e-50	1.83806e-47	356
COAD	FASLG	CD8_naive	-0.450816	7.12537e-18	1.59456e-15	356
COAD	FASLG	Central_memory	0.292836	6.28808e-08	1.661e-06	356
COAD	FASLG	Cytotoxic	0.805908	1.97784e-76	2.81377e-73	356
COAD	FASLG	DC	0.144951	0.00846113	0.0239444	356
COAD	FASLG	Effector_memory	0.341096	2.08486e-10	1.10731e-08	356
COAD	FASLG	Exhausted	0.456627	2.37601e-18	4.87866e-16	356
COAD	FASLG	Gamma_delta	0.203406	0.000203765	0.00103319	356
COAD	FASLG	InfiltrationScore	0.626054	3.31551e-37	8.53165e-36	356
COAD	FASLG	MAIT	0.200484	0.000252383	0.000623584	356
COAD	FASLG	Macrophage	0.314363	5.58447e-09	4.81289e-08	356
COAD	FASLG	Monocyte	-0.315368	4.96342e-09	5.00539e-08	356
COAD	FASLG	NK	0.808129	3.67483e-77	1.46383e-73	356
COAD	FASLG	NKT	-0.181221	0.000960258	0.00260991	356
COAD	FASLG	Neutrophil	-0.626778	2.5946e-37	2.34894e-35	356
COAD	FASLG	Tfh	0.599182	1.92151e-33	1.62854e-31	356
COAD	FASLG	Th1	0.636939	7.74911e-39	1.18722e-35	356
COAD	FASLG	Th17	-0.265624	1.0201e-06	9.11913e-06	356
COAD	FASLG	Th2	0.341539	1.96897e-10	9.82363e-10	356
COAD	FASLG	Tr1	0.208357	0.000140821	0.000527005	356
COAD	FASLG	iTreg	0.372358	2.93349e-12	7.04506e-11	356
COAD	FASLG	nTreg	0.0178595	0.746897	0.796165	356
COAD	MLKL	Bcell	-0.147485	0.00737063	0.0156138	197259
COAD	MLKL	CD4_T	-0.102824	0.0624755	0.0916292	197259
COAD	MLKL	CD4_naive	-0.0427424	0.439712	0.854457	197259
COAD	MLKL	CD8_T	0.055238	0.317855	0.437737	197259
COAD	MLKL	CD8_naive	0.0048367	0.930356	0.950593	197259
COAD	MLKL	Central_memory	0.0929747	0.0922515	0.211241	197259
COAD	MLKL	Cytotoxic	0.0986111	0.0740682	0.118634	197259
COAD	MLKL	DC	0.139653	0.0112167	0.0302222	197259
COAD	MLKL	Effector_memory	0.0186612	0.735948	0.827085	197259
COAD	MLKL	Exhausted	0.24289	8.35945e-06	5.0653e-05	197259
COAD	MLKL	Gamma_delta	0.113227	0.0401166	0.0883266	197259
COAD	MLKL	InfiltrationScore	-0.0233423	0.673144	0.732167	197259
COAD	MLKL	MAIT	-0.141994	0.0099138	0.0180059	197259
COAD	MLKL	Macrophage	0.0724655	0.189815	0.287691	197259
COAD	MLKL	Monocyte	0.143356	0.00921931	0.0190163	197259
COAD	MLKL	NK	-0.0917852	0.0965116	0.134027	197259
COAD	MLKL	NKT	-0.302972	2.06069e-08	1.80013e-07	197259
COAD	MLKL	Neutrophil	-0.179083	0.00110504	0.00303908	197259
COAD	MLKL	Tfh	-0.0638234	0.248327	0.325149	197259
COAD	MLKL	Th1	0.28675	1.2036e-07	2.89869e-06	197259
COAD	MLKL	Th17	-0.135095	0.0141937	0.0336582	197259
COAD	MLKL	Th2	-0.154355	0.00501712	0.00888705	197259
COAD	MLKL	Tr1	0.00331009	0.952306	0.968054	197259
COAD	MLKL	iTreg	0.250908	4.07244e-06	2.4727e-05	197259
COAD	MLKL	nTreg	0.283104	1.76305e-07	6.69107e-07	197259
COAD	RIPK1	Bcell	0.342422	1.75624e-10	3.48396e-09	8737
COAD	RIPK1	CD4_T	0.280456	2.31837e-07	7.64615e-07	8737
COAD	RIPK1	CD4_naive	-0.077123	0.162823	0.707259	8737
COAD	RIPK1	CD8_T	0.324643	1.63767e-09	3.16982e-08	8737
COAD	RIPK1	CD8_naive	-0.362479	1.18716e-11	3.26583e-10	8737
COAD	RIPK1	Central_memory	0.087449	0.113381	0.244659	8737
COAD	RIPK1	Cytotoxic	0.373672	2.42671e-12	2.95614e-11	8737
COAD	RIPK1	DC	-0.0608551	0.271058	0.397398	8737
COAD	RIPK1	Effector_memory	0.143819	0.00899354	0.0281509	8737
COAD	RIPK1	Exhausted	-0.120079	0.0294336	0.0605983	8737
COAD	RIPK1	Gamma_delta	-0.205716	0.00017168	0.000891852	8737
COAD	RIPK1	InfiltrationScore	0.332333	6.34532e-10	3.18899e-09	8737
COAD	RIPK1	MAIT	0.413151	5.39398e-15	1.37381e-13	8737
COAD	RIPK1	Macrophage	0.111974	0.0423894	0.0843089	8737
COAD	RIPK1	Monocyte	-0.352963	4.36458e-11	7.96785e-10	8737
COAD	RIPK1	NK	0.477168	4.12343e-20	8.74616e-19	8737
COAD	RIPK1	NKT	0.143777	0.00901366	0.0190741	8737
COAD	RIPK1	Neutrophil	-0.232497	2.0481e-05	8.0537e-05	8737
COAD	RIPK1	Tfh	0.392427	1.47493e-13	2.43584e-12	8737
COAD	RIPK1	Th1	0.0391631	0.478994	0.618494	8737
COAD	RIPK1	Th17	0.190486	0.000513104	0.00193661	8737
COAD	RIPK1	Th2	0.4013	3.67973e-14	3.03475e-13	8737
COAD	RIPK1	Tr1	0.115829	0.035726	0.0714484	8737
COAD	RIPK1	iTreg	-0.028673	0.604313	0.703825	8737
COAD	RIPK1	nTreg	-0.247805	5.39505e-06	1.6363e-05	8737
COAD	RIPK3	Bcell	0.275895	3.69082e-07	2.43724e-06	11035
COAD	RIPK3	CD4_T	0.185081	0.000742239	0.0015253	11035
COAD	RIPK3	CD4_naive	-0.00224319	0.967668	0.989598	11035
COAD	RIPK3	CD8_T	0.225345	3.7073e-05	0.000230422	11035
COAD	RIPK3	CD8_naive	-0.198331	0.00029491	0.00103034	11035
COAD	RIPK3	Central_memory	0.0397333	0.47261	0.645609	11035
COAD	RIPK3	Cytotoxic	0.161994	0.00321287	0.00740291	11035
COAD	RIPK3	DC	-0.158155	0.00402898	0.012707	11035
COAD	RIPK3	Effector_memory	0.251069	4.01284e-06	4.3296e-05	11035
COAD	RIPK3	Exhausted	-0.172512	0.00168512	0.00520026	11035
COAD	RIPK3	Gamma_delta	-0.269586	6.92558e-07	8.34969e-06	11035
COAD	RIPK3	InfiltrationScore	0.16393	0.00286089	0.00568157	11035
COAD	RIPK3	MAIT	0.396069	8.38347e-14	1.62742e-12	11035
COAD	RIPK3	Macrophage	-0.0448761	0.417199	0.53457	11035
COAD	RIPK3	Monocyte	-0.373942	2.33383e-12	6.21428e-11	11035
COAD	RIPK3	NK	0.319388	3.08372e-09	1.34631e-08	11035
COAD	RIPK3	NKT	0.271114	5.95547e-07	3.54392e-06	11035
COAD	RIPK3	Neutrophil	-0.0722777	0.190968	0.275997	11035
COAD	RIPK3	Tfh	0.29287	6.26523e-08	3.44044e-07	11035
COAD	RIPK3	Th1	-0.0369105	0.50466	0.639926	11035
COAD	RIPK3	Th17	0.260253	1.70723e-06	1.4245e-05	11035
COAD	RIPK3	Th2	0.293976	5.55847e-08	2.02354e-07	11035
COAD	RIPK3	Tr1	0.0948216	0.0859367	0.150808	11035
COAD	RIPK3	iTreg	-0.142375	0.00971529	0.02388	11035
COAD	RIPK3	nTreg	-0.250769	4.12422e-06	1.2727e-05	11035
COAD	TLR3	Bcell	0.225118	3.7766e-05	0.000143056	7098
COAD	TLR3	CD4_T	0.281067	2.17695e-07	7.20717e-07	7098
COAD	TLR3	CD4_naive	-0.0151068	0.784865	0.952659	7098
COAD	TLR3	CD8_T	0.279967	2.43782e-07	2.88497e-06	7098
COAD	TLR3	CD8_naive	-0.360893	1.47932e-11	3.939e-10	7098
COAD	TLR3	Central_memory	0.209697	0.000127229	0.00117153	7098
COAD	TLR3	Cytotoxic	0.370183	4.00669e-12	4.71639e-11	7098
COAD	TLR3	DC	-0.0375863	0.496885	0.622458	7098
COAD	TLR3	Effector_memory	0.132472	0.0162038	0.04581	7098
COAD	TLR3	Exhausted	-0.0833512	0.131369	0.21186	7098
COAD	TLR3	Gamma_delta	-0.237077	1.3869e-05	0.000104711	7098
COAD	TLR3	InfiltrationScore	0.366519	6.74067e-12	4.10582e-11	7098
COAD	TLR3	MAIT	0.417656	2.54805e-15	6.87662e-14	7098
COAD	TLR3	Macrophage	0.136273	0.0133644	0.0317145	7098
COAD	TLR3	Monocyte	-0.364245	9.2787e-12	2.11931e-10	7098
COAD	TLR3	NK	0.543361	1.15026e-26	4.75307e-25	7098
COAD	TLR3	NKT	0.203642	0.000200243	0.000645347	7098
COAD	TLR3	Neutrophil	-0.259123	1.89992e-06	8.89951e-06	7098
COAD	TLR3	Tfh	0.401768	3.41548e-14	6.09008e-13	7098
COAD	TLR3	Th1	0.0910925	0.0990637	0.193474	7098
COAD	TLR3	Th17	0.26536	1.04646e-06	9.33795e-06	7098
COAD	TLR3	Th2	0.419922	1.73959e-15	1.72805e-14	7098
COAD	TLR3	Tr1	0.141723	0.0100577	0.023791	7098
COAD	TLR3	iTreg	0.0197428	0.721261	0.797366	7098
COAD	TLR3	nTreg	-0.22695	3.2505e-05	8.7297e-05	7098
COAD	TNF	Bcell	-0.0371339	0.502083	0.590701	7124
COAD	TNF	CD4_T	0.295347	4.78904e-08	1.71707e-07	7124
COAD	TNF	CD4_naive	0.0447022	0.419009	0.848024	7124
COAD	TNF	CD8_T	0.191774	0.000469214	0.00199261	7124
COAD	TNF	CD8_naive	-0.0967772	0.0796337	0.134367	7124
COAD	TNF	Central_memory	0.279417	2.57921e-07	5.82429e-06	7124
COAD	TNF	Cytotoxic	0.398458	5.76628e-14	8.66117e-13	7124
COAD	TNF	DC	0.315742	4.74966e-09	7.61666e-08	7124
COAD	TNF	Effector_memory	-0.0225834	0.683186	0.788356	7124
COAD	TNF	Exhausted	0.265897	9.93369e-07	7.82632e-06	7124
COAD	TNF	Gamma_delta	-0.0139688	0.800718	0.866215	7124
COAD	TNF	InfiltrationScore	0.508052	5.42711e-23	6.48421e-22	7124
COAD	TNF	MAIT	0.00363478	0.947634	0.958656	7124
COAD	TNF	Macrophage	0.382652	6.49159e-13	8.22475e-12	7124
COAD	TNF	Monocyte	0.0232378	0.674524	0.746319	7124
COAD	TNF	NK	0.366873	6.41203e-12	4.19542e-11	7124
COAD	TNF	NKT	-0.0406456	0.462497	0.55787	7124
COAD	TNF	Neutrophil	-0.321651	2.35155e-09	1.68051e-08	7124
COAD	TNF	Tfh	0.352683	4.53195e-11	4.72581e-10	7124
COAD	TNF	Th1	0.254239	2.99875e-06	4.4046e-05	7124
COAD	TNF	Th17	-0.142379	0.00971298	0.024389	7124
COAD	TNF	Th2	0.198001	0.000301991	0.000646192	7124
COAD	TNF	Tr1	0.337419	3.33986e-10	3.46098e-09	7124
COAD	TNF	iTreg	0.278145	2.93736e-07	2.3265e-06	7124
COAD	TNF	nTreg	-0.0170848	0.757525	0.804802	7124
DLBC	FADD	Bcell	0.0668241	0.651793	0.796623	8772
DLBC	FADD	CD4_T	-0.25665	0.0782592	0.203329	8772
DLBC	FADD	CD4_naive	-0.190846	0.193824	0.570878	8772
DLBC	FADD	CD8_T	0.286444	0.0484042	0.174531	8772
DLBC	FADD	CD8_naive	-0.116465	0.430513	0.786301	8772
DLBC	FADD	Central_memory	-0.510383	0.000210485	0.000929223	8772
DLBC	FADD	Cytotoxic	0.252137	0.0838333	0.42734	8772
DLBC	FADD	DC	0.348551	0.0151887	0.135969	8772
DLBC	FADD	Effector_memory	0.1738	0.237444	0.478964	8772
DLBC	FADD	Exhausted	0.151498	0.304003	0.658312	8772
DLBC	FADD	Gamma_delta	0.273149	0.0603202	0.235618	8772
DLBC	FADD	InfiltrationScore	0.477894	0.000592266	0.00776163	8772
DLBC	FADD	MAIT	0.140174	0.341982	0.646114	8772
DLBC	FADD	Macrophage	0.209201	0.153573	0.507051	8772
DLBC	FADD	Monocyte	0.0397437	0.788545	0.946956	8772
DLBC	FADD	NK	0.546797	5.793e-05	0.00246692	8772
DLBC	FADD	NKT	0.111178	0.451874	0.895342	8772
DLBC	FADD	Neutrophil	-0.109609	0.45832	0.775156	8772
DLBC	FADD	Tfh	-0.0215007	0.88467	0.979555	8772
DLBC	FADD	Th1	0.35443	0.013449	0.073449	8772
DLBC	FADD	Th17	-0.343766	0.0167425	0.0560103	8772
DLBC	FADD	Th2	0.382106	0.00736084	0.0538698	8772
DLBC	FADD	Tr1	-0.202673	0.167116	0.408074	8772
DLBC	FADD	iTreg	-0.495823	0.000338931	0.00173567	8772
DLBC	FADD	nTreg	-0.20562	0.160898	0.472707	8772
DLBC	FAS	Bcell	-0.672312	1.66778e-07	2.1771e-05	355
DLBC	FAS	CD4_T	0.10596	0.473507	0.640753	355
DLBC	FAS	CD4_naive	0.14927	0.311252	0.663821	355
DLBC	FAS	CD8_T	0.0611985	0.679455	0.824606	355
DLBC	FAS	CD8_naive	0.0210669	0.886982	0.968075	355
DLBC	FAS	Central_memory	0.570754	2.2771e-05	0.000134871	355
DLBC	FAS	Cytotoxic	0.296435	0.0407699	0.305715	355
DLBC	FAS	DC	0.304039	0.0356466	0.206558	355
DLBC	FAS	Effector_memory	-0.31698	0.0281516	0.158067	355
DLBC	FAS	Exhausted	-0.129578	0.38006	0.714785	355
DLBC	FAS	Gamma_delta	0.0116188	0.937528	0.971429	355
DLBC	FAS	InfiltrationScore	-0.0611209	0.67984	0.814063	355
DLBC	FAS	MAIT	0.079316	0.592043	0.822559	355
DLBC	FAS	Macrophage	0.178423	0.225003	0.592766	355
DLBC	FAS	Monocyte	0.17092	0.245429	0.701647	355
DLBC	FAS	NK	0.00255157	0.986268	0.99333	355
DLBC	FAS	NKT	-0.0210395	0.887128	0.980017	355
DLBC	FAS	Neutrophil	0.0860478	0.560889	0.828043	355
DLBC	FAS	Tfh	0.0827994	0.575826	0.892888	355
DLBC	FAS	Th1	-0.237789	0.103639	0.263982	355
DLBC	FAS	Th17	0.580689	1.5127e-05	0.000401216	355
DLBC	FAS	Th2	-0.396539	0.00526624	0.0445101	355
DLBC	FAS	Tr1	0.0362866	0.806569	0.920345	355
DLBC	FAS	iTreg	0.210115	0.151743	0.260026	355
DLBC	FAS	nTreg	0.146274	0.321173	0.636462	355
DLBC	FASLG	Bcell	-0.641913	8.77838e-07	7.557e-05	356
DLBC	FASLG	CD4_T	0.25665	0.0782592	0.203329	356
DLBC	FASLG	CD4_naive	0.00703083	0.962172	0.987711	356
DLBC	FASLG	CD8_T	0.39331	0.00568307	0.0518512	356
DLBC	FASLG	CD8_naive	-0.0247591	0.867339	0.962253	356
DLBC	FASLG	Central_memory	0.527756	0.00011584	0.000554542	356
DLBC	FASLG	Cytotoxic	0.52889	0.000111283	0.00688097	356
DLBC	FASLG	DC	-0.139996	0.342602	0.619058	356
DLBC	FASLG	Effector_memory	-0.565083	2.8591e-05	0.00732064	356
DLBC	FASLG	Exhausted	0.125832	0.394101	0.714785	356
DLBC	FASLG	Gamma_delta	0.272986	0.0604795	0.235895	356
DLBC	FASLG	InfiltrationScore	-0.19829	0.176682	0.341961	356
DLBC	FASLG	MAIT	0.290499	0.0451759	0.287708	356
DLBC	FASLG	Macrophage	0.173701	0.237717	0.605363	356
DLBC	FASLG	Monocyte	-0.176078	0.231257	0.689354	356
DLBC	FASLG	NK	-0.0106949	0.942486	0.969491	356
DLBC	FASLG	NKT	0.192237	0.190536	0.818033	356
DLBC	FASLG	Neutrophil	-0.0306732	0.836043	0.944275	356
DLBC	FASLG	Tfh	0.352861	0.0138955	0.21571	356
DLBC	FASLG	Th1	-0.215471	0.141342	0.320163	356
DLBC	FASLG	Th17	0.20006	0.172773	0.323972	356
DLBC	FASLG	Th2	-0.542878	6.704e-05	0.00387018	356
DLBC	FASLG	Tr1	0.124396	0.399564	0.654589	356
DLBC	FASLG	iTreg	0.380418	0.00764769	0.0237468	356
DLBC	FASLG	nTreg	0.0724311	0.624677	0.845272	356
DLBC	MLKL	Bcell	-0.753087	6.61714e-10	3.60347e-07	197259
DLBC	MLKL	CD4_T	0.308327	0.0329994	0.115382	197259
DLBC	MLKL	CD4_naive	0.191522	0.19222	0.570878	197259
DLBC	MLKL	CD8_T	-0.0569629	0.700563	0.837472	197259
DLBC	MLKL	CD8_naive	0.132103	0.370766	0.758003	197259
DLBC	MLKL	Central_memory	0.540026	7.4475e-05	0.000377707	197259
DLBC	MLKL	Cytotoxic	0.380152	0.00769375	0.122146	197259
DLBC	MLKL	DC	-0.0246987	0.867659	0.955971	197259
DLBC	MLKL	Effector_memory	-0.413695	0.0034691	0.0661663	197259
DLBC	MLKL	Exhausted	-0.199777	0.173393	0.552666	197259
DLBC	MLKL	Gamma_delta	-0.0299699	0.839753	0.924205	197259
DLBC	MLKL	InfiltrationScore	-0.243941	0.0947474	0.223781	197259
DLBC	MLKL	MAIT	0.192291	0.190408	0.507451	197259
DLBC	MLKL	Macrophage	0.160185	0.276781	0.642776	197259
DLBC	MLKL	Monocyte	0.139157	0.345529	0.782225	197259
DLBC	MLKL	NK	-0.109663	0.458096	0.657546	197259
DLBC	MLKL	NKT	0.0938894	0.525596	0.915075	197259
DLBC	MLKL	Neutrophil	0.19544	0.183112	0.584765	197259
DLBC	MLKL	Tfh	0.0500054	0.73572	0.945364	197259
DLBC	MLKL	Th1	-0.373381	0.00895002	0.0571451	197259
DLBC	MLKL	Th17	0.519992	0.000151878	0.00174629	197259
DLBC	MLKL	Th2	-0.669611	1.94799e-07	0.000149636	197259
DLBC	MLKL	Tr1	0.00717041	0.961422	0.98713	197259
DLBC	MLKL	iTreg	0.326446	0.0235435	0.0599759	197259
DLBC	MLKL	nTreg	0.0804127	0.586916	0.823455	197259
DLBC	RIPK1	Bcell	-0.381782	0.00741514	0.0459495	8737
DLBC	RIPK1	CD4_T	0.35197	0.0141548	0.067973	8737
DLBC	RIPK1	CD4_naive	0.126082	0.393156	0.719803	8737
DLBC	RIPK1	CD8_T	0.27151	0.0619392	0.201638	8737
DLBC	RIPK1	CD8_naive	0.130257	0.377548	0.761428	8737
DLBC	RIPK1	Central_memory	0.406797	0.00411364	0.0123415	8737
DLBC	RIPK1	Cytotoxic	0.218475	0.135744	0.527821	8737
DLBC	RIPK1	DC	-0.146075	0.321837	0.601397	8737
DLBC	RIPK1	Effector_memory	-0.478433	0.000582669	0.0323252	8737
DLBC	RIPK1	Exhausted	0.0763038	0.606228	0.831266	8737
DLBC	RIPK1	Gamma_delta	0.0102614	0.944814	0.974127	8737
DLBC	RIPK1	InfiltrationScore	-0.144606	0.326782	0.514789	8737
DLBC	RIPK1	MAIT	0.228176	0.118799	0.418775	8737
DLBC	RIPK1	Macrophage	0.0569955	0.7004	0.898708	8737
DLBC	RIPK1	Monocyte	-0.104626	0.479126	0.85622	8737
DLBC	RIPK1	NK	-0.0445168	0.763841	0.881613	8737
DLBC	RIPK1	NKT	-0.0880179	0.551918	0.921808	8737
DLBC	RIPK1	Neutrophil	-0.129533	0.380226	0.735672	8737
DLBC	RIPK1	Tfh	0.279944	0.0539663	0.40755	8737
DLBC	RIPK1	Th1	-0.334012	0.0203312	0.095251	8737
DLBC	RIPK1	Th17	0.153859	0.29644	0.47277	8737
DLBC	RIPK1	Th2	-0.22226	0.12893	0.303548	8737
DLBC	RIPK1	Tr1	0.259438	0.074963	0.260466	8737
DLBC	RIPK1	iTreg	0.474528	0.000655487	0.00301784	8737
DLBC	RIPK1	nTreg	0.175214	0.233591	0.552048	8737
DLBC	RIPK3	Bcell	-0.244063	0.0945775	0.244899	11035
DLBC	RIPK3	CD4_T	0.157963	0.283584	0.458921	11035
DLBC	RIPK3	CD4_naive	-0.00243375	0.986902	0.995676	11035
DLBC	RIPK3	CD8_T	0.415791	0.00329169	0.0382887	11035
DLBC	RIPK3	CD8_naive	-0.124555	0.398954	0.772915	11035
DLBC	RIPK3	Central_memory	0.0667771	0.652023	0.756709	11035
DLBC	RIPK3	Cytotoxic	0.428945	0.00234986	0.0576552	11035
DLBC	RIPK3	DC	-0.0175334	0.905844	0.972787	11035
DLBC	RIPK3	Effector_memory	-0.151602	0.303665	0.548106	11035
DLBC	RIPK3	Exhausted	0.119866	0.417079	0.730629	11035
DLBC	RIPK3	Gamma_delta	0.395852	0.00535257	0.0733207	11035
DLBC	RIPK3	InfiltrationScore	0.12615	0.392897	0.579366	11035
DLBC	RIPK3	MAIT	0.297666	0.0399021	0.27597	11035
DLBC	RIPK3	Macrophage	0.14276	0.333059	0.692305	11035
DLBC	RIPK3	Monocyte	-0.139917	0.342874	0.779942	11035
DLBC	RIPK3	NK	0.265689	0.0679727	0.186759	11035
DLBC	RIPK3	NKT	0.140535	0.340727	0.862374	11035
DLBC	RIPK3	Neutrophil	-0.218893	0.13498	0.53499	11035
DLBC	RIPK3	Tfh	0.292051	0.0439882	0.36636	11035
DLBC	RIPK3	Th1	-0.0207977	0.888417	0.941337	11035
DLBC	RIPK3	Th17	-0.196477	0.180754	0.335006	11035
DLBC	RIPK3	Th2	-0.276613	0.0570099	0.184978	11035
DLBC	RIPK3	Tr1	-0.0168939	0.909264	0.96992	11035
DLBC	RIPK3	iTreg	0.00196064	0.989448	0.992579	11035
DLBC	RIPK3	nTreg	0.00070585	0.996201	0.998701	11035
DLBC	TLR3	Bcell	-0.477214	0.000604573	0.00811461	7098
DLBC	TLR3	CD4_T	0.16122	0.273646	0.447862	7098
DLBC	TLR3	CD4_naive	-0.0152109	0.918271	0.970971	7098
DLBC	TLR3	CD8_T	-0.176156	0.231047	0.446532	7098
DLBC	TLR3	CD8_naive	0.103597	0.483483	0.811166	7098
DLBC	TLR3	Central_memory	0.501588	0.000281384	0.00120056	7098
DLBC	TLR3	Cytotoxic	0.165679	0.26042	0.682648	7098
DLBC	TLR3	DC	-0.173488	0.2383	0.519294	7098
DLBC	TLR3	Effector_memory	-0.353953	0.0135834	0.115001	7098
DLBC	TLR3	Exhausted	-0.18632	0.204807	0.585348	7098
DLBC	TLR3	Gamma_delta	-0.138882	0.346493	0.598338	7098
DLBC	TLR3	InfiltrationScore	-0.279604	0.0542707	0.151551	7098
DLBC	TLR3	MAIT	-0.139142	0.345582	0.649108	7098
DLBC	TLR3	Macrophage	0.128159	0.385345	0.730388	7098
DLBC	TLR3	Monocyte	0.0972961	0.510614	0.866146	7098
DLBC	TLR3	NK	-0.273236	0.0602358	0.172083	7098
DLBC	TLR3	NKT	0.0335436	0.820941	0.975002	7098
DLBC	TLR3	Neutrophil	0.132193	0.370435	0.735672	7098
DLBC	TLR3	Tfh	0.0359974	0.808081	0.964898	7098
DLBC	TLR3	Th1	-0.109256	0.459779	0.657471	7098
DLBC	TLR3	Th17	0.435354	0.00198431	0.0110917	7098
DLBC	TLR3	Th2	-0.345126	0.0162876	0.0862626	7098
DLBC	TLR3	Tr1	0.150742	0.306451	0.568867	7098
DLBC	TLR3	iTreg	0.429325	0.00232667	0.00879747	7098
DLBC	TLR3	nTreg	0.12032	0.415304	0.711054	7098
DLBC	TNF	Bcell	-0.200092	0.172702	0.352571	7124
DLBC	TNF	CD4_T	0.155575	0.291019	0.467485	7124
DLBC	TNF	CD4_naive	0.229651	0.116369	0.491775	7124
DLBC	TNF	CD8_T	0.00765659	0.958808	0.980257	7124
DLBC	TNF	CD8_naive	0.236134	0.106137	0.603909	7124
DLBC	TNF	Central_memory	0.17476	0.234822	0.354059	7124
DLBC	TNF	Cytotoxic	0.0890895	0.547068	0.858156	7124
DLBC	TNF	DC	-0.0382152	0.796501	0.921845	7124
DLBC	TNF	Effector_memory	0.0603126	0.68385	0.82306	7124
DLBC	TNF	Exhausted	0.0700608	0.636083	0.845908	7124
DLBC	TNF	Gamma_delta	0.113473	0.442532	0.683334	7124
DLBC	TNF	InfiltrationScore	-0.202958	0.166506	0.329057	7124
DLBC	TNF	MAIT	-0.0637351	0.666928	0.864703	7124
DLBC	TNF	Macrophage	-0.092767	0.53058	0.817459	7124
DLBC	TNF	Monocyte	0.0528831	0.721109	0.927366	7124
DLBC	TNF	NK	-0.0893051	0.546095	0.728078	7124
DLBC	TNF	NKT	-0.227411	0.120073	0.792914	7124
DLBC	TNF	Neutrophil	0.0447883	0.762443	0.916933	7124
DLBC	TNF	Tfh	-0.0186231	0.900021	0.982152	7124
DLBC	TNF	Th1	-0.0850371	0.565517	0.738396	7124
DLBC	TNF	Th17	0.167703	0.25456	0.426052	7124
DLBC	TNF	Th2	-0.170848	0.245631	0.452685	7124
DLBC	TNF	Tr1	0.03281	0.824795	0.929564	7124
DLBC	TNF	iTreg	0.0744497	0.615031	0.724813	7124
DLBC	TNF	nTreg	0.0899688	0.543103	0.796217	7124
ESCA	FADD	Bcell	-0.217418	0.00220536	0.00954434	8772
ESCA	FADD	CD4_T	-0.339532	1.12476e-06	5.9886e-06	8772
ESCA	FADD	CD4_naive	-0.0651824	0.364046	0.849273	8772
ESCA	FADD	CD8_T	0.0302136	0.674207	0.847247	8772
ESCA	FADD	CD8_naive	0.0225097	0.754159	0.873024	8772
ESCA	FADD	Central_memory	-0.160873	0.0242905	0.0671139	8772
ESCA	FADD	Cytotoxic	0.143996	0.0440568	0.186271	8772
ESCA	FADD	DC	0.275142	9.5026e-05	0.0004472	8772
ESCA	FADD	Effector_memory	-0.00881049	0.902455	0.967671	8772
ESCA	FADD	Exhausted	0.187928	0.00834677	0.0620601	8772
ESCA	FADD	Gamma_delta	-0.00437049	0.951522	0.972229	8772
ESCA	FADD	InfiltrationScore	0.088515	0.217312	0.405137	8772
ESCA	FADD	MAIT	-0.279406	7.3105e-05	0.000768923	8772
ESCA	FADD	Macrophage	0.156522	0.0284654	0.0824133	8772
ESCA	FADD	Monocyte	0.21213	0.00283693	0.0291687	8772
ESCA	FADD	NK	-0.0181545	0.80061	0.883901	8772
ESCA	FADD	NKT	-0.161388	0.0238327	0.144026	8772
ESCA	FADD	Neutrophil	-0.0356825	0.61953	0.739909	8772
ESCA	FADD	Tfh	-0.146147	0.0409573	0.0815985	8772
ESCA	FADD	Th1	0.149323	0.0367186	0.179163	8772
ESCA	FADD	Th17	-0.227927	0.0013137	0.00721781	8772
ESCA	FADD	Th2	0.0610045	0.395663	0.546077	8772
ESCA	FADD	Tr1	-0.0809856	0.259151	0.41612	8772
ESCA	FADD	iTreg	0.0836551	0.243726	0.448539	8772
ESCA	FADD	nTreg	-0.00647512	0.928229	0.951277	8772
ESCA	FAS	Bcell	-0.114323	0.110597	0.209996	355
ESCA	FAS	CD4_T	0.0848313	0.237137	0.317264	355
ESCA	FAS	CD4_naive	0.0151881	0.832664	0.94681	355
ESCA	FAS	CD8_T	0.246066	0.000508024	0.0104361	355
ESCA	FAS	CD8_naive	-0.058324	0.416789	0.639812	355
ESCA	FAS	Central_memory	0.0850091	0.236152	0.372334	355
ESCA	FAS	Cytotoxic	0.446911	5.16145e-11	2.02655e-09	355
ESCA	FAS	DC	0.196459	0.00578392	0.015339	355
ESCA	FAS	Effector_memory	0.00570492	0.936747	0.979745	355
ESCA	FAS	Exhausted	0.357076	2.7846e-07	1.5537e-05	355
ESCA	FAS	Gamma_delta	0.195516	0.00602771	0.0267615	355
ESCA	FAS	InfiltrationScore	0.33779	1.28609e-06	1.8949e-05	355
ESCA	FAS	MAIT	-0.110462	0.123246	0.233772	355
ESCA	FAS	Macrophage	0.233646	0.000981198	0.00581615	355
ESCA	FAS	Monocyte	-0.0160785	0.823011	0.913599	355
ESCA	FAS	NK	0.272718	0.000110097	0.000920534	355
ESCA	FAS	NKT	-0.179722	0.0117166	0.0966943	355
ESCA	FAS	Neutrophil	-0.430286	3.08476e-10	5.01884e-09	355
ESCA	FAS	Tfh	0.231581	0.00109113	0.00388894	355
ESCA	FAS	Th1	0.349488	5.1464e-07	1.9375e-05	355
ESCA	FAS	Th17	-0.292233	3.236e-05	0.000385449	355
ESCA	FAS	Th2	0.232815	0.00102415	0.00531659	355
ESCA	FAS	Tr1	0.140622	0.0493106	0.124901	355
ESCA	FAS	iTreg	0.390534	1.52404e-08	6.63007e-07	355
ESCA	FAS	nTreg	0.043302	0.546752	0.654193	355
ESCA	FASLG	Bcell	0.0461472	0.520697	0.65394	356
ESCA	FASLG	CD4_T	0.369098	1.01795e-07	7.10693e-07	356
ESCA	FASLG	CD4_naive	-0.108215	0.131104	0.848993	356
ESCA	FASLG	CD8_T	0.586053	1.81896e-19	1.74464e-16	356
ESCA	FASLG	CD8_naive	-0.23985	0.00070924	0.0141161	356
ESCA	FASLG	Central_memory	0.297051	2.3584e-05	0.000288431	356
ESCA	FASLG	Cytotoxic	0.841255	1.03637e-53	2.60931e-50	356
ESCA	FASLG	DC	-0.0258881	0.718716	0.794489	356
ESCA	FASLG	Effector_memory	0.176953	0.0130977	0.146482	356
ESCA	FASLG	Exhausted	0.567615	4.13562e-18	4.62776e-15	356
ESCA	FASLG	Gamma_delta	0.452113	2.891e-11	1.11982e-08	356
ESCA	FASLG	InfiltrationScore	0.504123	4.97051e-14	2.63463e-12	356
ESCA	FASLG	MAIT	0.178506	0.0123065	0.0411211	356
ESCA	FASLG	Macrophage	0.132476	0.0641743	0.152753	356
ESCA	FASLG	Monocyte	-0.327093	2.87752e-06	0.000241496	356
ESCA	FASLG	NK	0.710947	1.74691e-31	5.86438e-28	356
ESCA	FASLG	NKT	-0.0976809	0.173184	0.417656	356
ESCA	FASLG	Neutrophil	-0.635339	1.49432e-23	1.44705e-21	356
ESCA	FASLG	Tfh	0.593149	5.18161e-20	6.24959e-18	356
ESCA	FASLG	Th1	0.697417	6.96742e-30	9.35585e-27	356
ESCA	FASLG	Th17	-0.396528	8.74202e-09	4.7664e-07	356
ESCA	FASLG	Th2	0.351274	4.46033e-07	7.22767e-06	356
ESCA	FASLG	Tr1	0.23746	0.000804508	0.00528864	356
ESCA	FASLG	iTreg	0.568183	3.76734e-18	1.25183e-15	356
ESCA	FASLG	nTreg	0.228763	0.0012594	0.00419633	356
ESCA	MLKL	Bcell	0.15658	0.0284059	0.073212	197259
ESCA	MLKL	CD4_T	0.131561	0.0660519	0.106425	197259
ESCA	MLKL	CD4_naive	-0.0866989	0.226933	0.848993	197259
ESCA	MLKL	CD8_T	0.196575	0.00575455	0.0598861	197259
ESCA	MLKL	CD8_naive	-0.207301	0.0035525	0.0372098	197259
ESCA	MLKL	Central_memory	0.325779	3.17023e-06	5.8708e-05	197259
ESCA	MLKL	Cytotoxic	0.304415	1.4382e-05	0.000296195	197259
ESCA	MLKL	DC	-0.0599397	0.403977	0.518803	197259
ESCA	MLKL	Effector_memory	0.102274	0.153746	0.464719	197259
ESCA	MLKL	Exhausted	0.256805	0.000279708	0.00532503	197259
ESCA	MLKL	Gamma_delta	0.00887805	0.901711	0.940417	197259
ESCA	MLKL	InfiltrationScore	0.144246	0.0436863	0.128626	197259
ESCA	MLKL	MAIT	0.168899	0.017958	0.0548709	197259
ESCA	MLKL	Macrophage	-0.00363228	0.959703	0.977819	197259
ESCA	MLKL	Monocyte	-0.0962965	0.179385	0.38793	197259
ESCA	MLKL	NK	0.15048	0.0352693	0.101009	197259
ESCA	MLKL	NKT	0.0386845	0.590356	0.78914	197259
ESCA	MLKL	Neutrophil	-0.156064	0.0289386	0.074328	197259
ESCA	MLKL	Tfh	0.273379	0.00010578	0.000539671	197259
ESCA	MLKL	Th1	0.354077	3.5566e-07	1.3883e-05	197259
ESCA	MLKL	Th17	-0.0732742	0.30742	0.455634	197259
ESCA	MLKL	Th2	-0.0562296	0.433745	0.580421	197259
ESCA	MLKL	Tr1	0.095339	0.183769	0.328087	197259
ESCA	MLKL	iTreg	0.0947251	0.186621	0.380188	197259
ESCA	MLKL	nTreg	0.285812	4.8903e-05	0.000244537	197259
ESCA	RIPK1	Bcell	0.294803	2.7354e-05	0.000279681	8737
ESCA	RIPK1	CD4_T	0.192248	0.00694459	0.0145358	8737
ESCA	RIPK1	CD4_naive	-0.113278	0.113914	0.848993	8737
ESCA	RIPK1	CD8_T	0.180064	0.011555	0.0930223	8737
ESCA	RIPK1	CD8_naive	-0.226589	0.00140515	0.0215885	8737
ESCA	RIPK1	Central_memory	0.174665	0.0143442	0.0446211	8737
ESCA	RIPK1	Cytotoxic	0.0307147	0.669119	0.84134	8737
ESCA	RIPK1	DC	-0.287432	4.4107e-05	0.000229031	8737
ESCA	RIPK1	Effector_memory	0.0535478	0.456025	0.746222	8737
ESCA	RIPK1	Exhausted	-0.112007	0.118054	0.327922	8737
ESCA	RIPK1	Gamma_delta	0.00313123	0.965258	0.979623	8737
ESCA	RIPK1	InfiltrationScore	-0.0323433	0.65269	0.800687	8737
ESCA	RIPK1	MAIT	0.0881495	0.219224	0.356299	8737
ESCA	RIPK1	Macrophage	-0.181968	0.0106921	0.0388528	8737
ESCA	RIPK1	Monocyte	-0.113226	0.114083	0.295792	8737
ESCA	RIPK1	NK	0.0672428	0.349048	0.527065	8737
ESCA	RIPK1	NKT	0.0929513	0.195044	0.444156	8737
ESCA	RIPK1	Neutrophil	-0.046484	0.517656	0.655986	8737
ESCA	RIPK1	Tfh	0.249742	0.000415347	0.00172351	8737
ESCA	RIPK1	Th1	0.00454596	0.949578	0.98205	8737
ESCA	RIPK1	Th17	0.101717	0.156013	0.279313	8737
ESCA	RIPK1	Th2	-0.0280933	0.695895	0.800544	8737
ESCA	RIPK1	Tr1	-0.0211269	0.768821	0.859023	8737
ESCA	RIPK1	iTreg	-0.01096	0.878821	0.937956	8737
ESCA	RIPK1	nTreg	0.012131	0.86599	0.90756	8737
ESCA	RIPK3	Bcell	0.365358	1.39838e-07	4.43561e-06	11035
ESCA	RIPK3	CD4_T	0.380862	3.65147e-08	2.82442e-07	11035
ESCA	RIPK3	CD4_naive	-0.0107583	0.881036	0.958663	11035
ESCA	RIPK3	CD8_T	0.082345	0.251214	0.531885	11035
ESCA	RIPK3	CD8_naive	-0.0635828	0.375961	0.606975	11035
ESCA	RIPK3	Central_memory	0.331009	2.1503e-06	4.284e-05	11035
ESCA	RIPK3	Cytotoxic	-0.0194145	0.787091	0.907286	11035
ESCA	RIPK3	DC	-0.377625	4.86126e-08	6.32938e-07	11035
ESCA	RIPK3	Effector_memory	0.0711381	0.321774	0.644575	11035
ESCA	RIPK3	Exhausted	-0.107346	0.134247	0.353758	11035
ESCA	RIPK3	Gamma_delta	-0.121977	0.0885463	0.19764	11035
ESCA	RIPK3	InfiltrationScore	-0.127536	0.0748519	0.192427	11035
ESCA	RIPK3	MAIT	0.32832	2.62761e-06	6.3919e-05	11035
ESCA	RIPK3	Macrophage	-0.268963	0.000137912	0.00117208	11035
ESCA	RIPK3	Monocyte	-0.180939	0.011151	0.0691724	11035
ESCA	RIPK3	NK	-0.01302	0.856272	0.918813	11035
ESCA	RIPK3	NKT	0.22553	0.00148155	0.0315114	11035
ESCA	RIPK3	Neutrophil	0.0313392	0.662801	0.771417	11035
ESCA	RIPK3	Tfh	0.320237	4.74581e-06	3.8008e-05	11035
ESCA	RIPK3	Th1	-0.0183201	0.798829	0.917281	11035
ESCA	RIPK3	Th17	0.236112	0.000863309	0.00518758	11035
ESCA	RIPK3	Th2	-0.142627	0.0461287	0.111687	11035
ESCA	RIPK3	Tr1	0.148828	0.0373545	0.102033	11035
ESCA	RIPK3	iTreg	-0.166113	0.0199706	0.0879421	11035
ESCA	RIPK3	nTreg	0.308694	1.0723e-05	6.4432e-05	11035
ESCA	TLR3	Bcell	0.0262793	0.714649	0.809951	7098
ESCA	TLR3	CD4_T	0.234175	0.000954734	0.00248132	7098
ESCA	TLR3	CD4_naive	-0.123404	0.084854	0.848993	7098
ESCA	TLR3	CD8_T	0.294376	2.8133e-05	0.000999374	7098
ESCA	TLR3	CD8_naive	-0.114926	0.108717	0.29708	7098
ESCA	TLR3	Central_memory	0.285886	4.8675e-05	0.000505783	7098
ESCA	TLR3	Cytotoxic	0.397769	7.78084e-09	2.49955e-07	7098
ESCA	TLR3	DC	-0.123376	0.084923	0.147431	7098
ESCA	TLR3	Effector_memory	0.16395	0.0216661	0.186495	7098
ESCA	TLR3	Exhausted	0.196866	0.00568159	0.0472053	7098
ESCA	TLR3	Gamma_delta	0.227298	0.001356	0.00853515	7098
ESCA	TLR3	InfiltrationScore	0.127552	0.0748171	0.192387	7098
ESCA	TLR3	MAIT	0.130715	0.0678282	0.150324	7098
ESCA	TLR3	Macrophage	-0.0685718	0.339583	0.50449	7098
ESCA	TLR3	Monocyte	-0.160507	0.02462	0.115152	7098
ESCA	TLR3	NK	0.308656	1.0751e-05	0.000122482	7098
ESCA	TLR3	NKT	0.00213461	0.976312	0.989938	7098
ESCA	TLR3	Neutrophil	-0.326002	3.1186e-06	2.665e-05	7098
ESCA	TLR3	Tfh	0.374628	6.3187e-08	9.30345e-07	7098
ESCA	TLR3	Th1	0.320679	4.59695e-06	0.000146932	7098
ESCA	TLR3	Th17	-0.0763424	0.287551	0.434823	7098
ESCA	TLR3	Th2	0.183381	0.0100889	0.0338684	7098
ESCA	TLR3	Tr1	0.044376	0.536842	0.683884	7098
ESCA	TLR3	iTreg	0.201977	0.00452679	0.0305558	7098
ESCA	TLR3	nTreg	0.138737	0.0524663	0.101789	7098
ESCA	TNF	Bcell	-0.141522	0.0478603	0.110235	7124
ESCA	TNF	CD4_T	0.10177	0.155795	0.22169	7124
ESCA	TNF	CD4_naive	0.0487286	0.49762	0.877984	7124
ESCA	TNF	CD8_T	0.125631	0.0793369	0.287825	7124
ESCA	TNF	CD8_naive	-0.110898	0.121761	0.318608	7124
ESCA	TNF	Central_memory	0.106756	0.136411	0.247509	7124
ESCA	TNF	Cytotoxic	0.377009	5.13157e-08	1.50233e-06	7124
ESCA	TNF	DC	0.148164	0.0382213	0.0760198	7124
ESCA	TNF	Effector_memory	-0.0488579	0.496478	0.770658	7124
ESCA	TNF	Exhausted	0.378146	4.64337e-08	3.45117e-06	7124
ESCA	TNF	Gamma_delta	0.0112167	0.876006	0.924522	7124
ESCA	TNF	InfiltrationScore	0.241481	0.000650321	0.00435175	7124
ESCA	TNF	MAIT	-0.102405	0.153218	0.274689	7124
ESCA	TNF	Macrophage	0.115157	0.108002	0.225668	7124
ESCA	TNF	Monocyte	-0.0802391	0.263582	0.490127	7124
ESCA	TNF	NK	0.289867	3.7721e-05	0.000361456	7124
ESCA	TNF	NKT	0.00283606	0.968531	0.986251	7124
ESCA	TNF	Neutrophil	-0.157314	0.0276622	0.0715975	7124
ESCA	TNF	Tfh	0.209567	0.00319853	0.00965599	7124
ESCA	TNF	Th1	0.385233	2.46884e-08	1.16731e-06	7124
ESCA	TNF	Th17	-0.241669	0.000643835	0.00412472	7124
ESCA	TNF	Th2	-0.00246717	0.972622	0.983713	7124
ESCA	TNF	Tr1	0.200709	0.00479173	0.0215347	7124
ESCA	TNF	iTreg	0.325315	3.28015e-06	8.2793e-05	7124
ESCA	TNF	nTreg	0.163195	0.0222862	0.0498378	7124
GBM	FADD	Bcell	-0.226863	0.00260983	0.0099084	8772
GBM	FADD	CD4_T	-0.340173	4.37852e-06	4.1205e-05	8772
GBM	FADD	CD4_naive	-0.218751	0.00373246	0.0156488	8772
GBM	FADD	CD8_T	0.116707	0.125123	0.262518	8772
GBM	FADD	CD8_naive	-0.101919	0.18083	0.310507	8772
GBM	FADD	Central_memory	-0.112974	0.137744	0.316869	8772
GBM	FADD	Cytotoxic	0.195609	0.00969005	0.0390863	8772
GBM	FADD	DC	0.207154	0.00609414	0.0230664	8772
GBM	FADD	Effector_memory	0.181061	0.0168052	0.0478357	8772
GBM	FADD	Exhausted	0.157712	0.0376725	0.0985868	8772
GBM	FADD	Gamma_delta	-0.162371	0.0323059	0.104148	8772
GBM	FADD	InfiltrationScore	0.341198	4.07946e-06	4.0417e-05	8772
GBM	FADD	MAIT	0.111402	0.143342	0.260496	8772
GBM	FADD	Macrophage	0.42053	7.58961e-09	7.58732e-08	8772
GBM	FADD	Monocyte	0.238778	0.0015086	0.00827964	8772
GBM	FADD	NK	0.238361	0.00153851	0.00840045	8772
GBM	FADD	NKT	0.155458	0.0405284	0.205734	8772
GBM	FADD	Neutrophil	-0.243714	0.00119262	0.00498656	8772
GBM	FADD	Tfh	0.10586	0.164456	0.361712	8772
GBM	FADD	Th1	0.155952	0.0398878	0.172844	8772
GBM	FADD	Th17	0.19882	0.00853808	0.0407232	8772
GBM	FADD	Th2	0.257882	0.000591519	0.00233439	8772
GBM	FADD	Tr1	0.0458208	0.548255	0.778959	8772
GBM	FADD	iTreg	0.037333	0.624787	0.811841	8772
GBM	FADD	nTreg	0.0736997	0.333807	0.536107	8772
GBM	FAS	Bcell	-0.519844	1.9714e-13	2.87693e-11	355
GBM	FAS	CD4_T	-0.0866493	0.255587	0.365828	355
GBM	FAS	CD4_naive	-0.243245	0.00121978	0.00762747	355
GBM	FAS	CD8_T	0.207463	0.00601709	0.0296881	355
GBM	FAS	CD8_naive	-0.412524	1.54694e-08	3.05004e-07	355
GBM	FAS	Central_memory	-0.177899	0.0188489	0.094525	355
GBM	FAS	Cytotoxic	0.401411	4.03189e-08	9.95167e-07	355
GBM	FAS	DC	0.293936	8.2626e-05	0.000776091	355
GBM	FAS	Effector_memory	0.296187	7.2408e-05	0.000556174	355
GBM	FAS	Exhausted	0.414679	1.27946e-08	1.33265e-06	355
GBM	FAS	Gamma_delta	-0.331388	7.94478e-06	0.000241505	355
GBM	FAS	InfiltrationScore	0.470406	5.7729e-11	1.24442e-09	355
GBM	FAS	MAIT	0.340126	4.39256e-06	7.9721e-05	355
GBM	FAS	Macrophage	0.625331	2.87312e-20	1.20332e-18	355
GBM	FAS	Monocyte	0.296497	7.1098e-05	0.000717622	355
GBM	FAS	NK	0.269392	0.000324888	0.00250465	355
GBM	FAS	NKT	0.16767	0.0270045	0.165606	355
GBM	FAS	Neutrophil	-0.436861	1.67412e-09	4.79208e-08	355
GBM	FAS	Tfh	0.360812	1.00374e-06	3.3169e-05	355
GBM	FAS	Th1	0.208054	0.00587181	0.0515507	355
GBM	FAS	Th17	0.268088	0.000348181	0.00378716	355
GBM	FAS	Th2	0.361389	9.61799e-07	9.69794e-06	355
GBM	FAS	Tr1	0.120323	0.113769	0.364524	355
GBM	FAS	iTreg	0.243092	0.00122876	0.0147931	355
GBM	FAS	nTreg	0.29218	9.1517e-05	0.00159146	355
GBM	FASLG	Bcell	-0.388375	1.18718e-07	2.08822e-06	356
GBM	FASLG	CD4_T	0.17513	0.0208126	0.0479054	356
GBM	FASLG	CD4_naive	-0.168549	0.0262009	0.0637526	356
GBM	FASLG	CD8_T	0.573573	1.31499e-16	1.24661e-13	356
GBM	FASLG	CD8_naive	-0.528276	6.80702e-14	3.65997e-12	356
GBM	FASLG	Central_memory	-0.146989	0.0529322	0.175887	356
GBM	FASLG	Cytotoxic	0.66191	2.6833e-23	2.32094e-20	356
GBM	FASLG	DC	0.308461	3.4581e-05	0.000381984	356
GBM	FASLG	Effector_memory	0.676415	1.27723e-24	3.62988e-21	356
GBM	FASLG	Exhausted	0.237945	0.0015689	0.008418	356
GBM	FASLG	Gamma_delta	-0.0234659	0.758578	0.862306	356
GBM	FASLG	InfiltrationScore	0.585189	2.2578e-17	8.80719e-16	356
GBM	FASLG	MAIT	0.410606	1.82954e-08	1.39988e-06	356
GBM	FASLG	Macrophage	0.435313	1.93873e-09	2.16802e-08	356
GBM	FASLG	Monocyte	-0.134315	0.0772305	0.175911	356
GBM	FASLG	NK	0.608423	5.34441e-19	2.65804e-15	356
GBM	FASLG	NKT	0.0208076	0.785221	0.909212	356
GBM	FASLG	Neutrophil	-0.686177	1.48893e-25	1.05788e-22	356
GBM	FASLG	Tfh	0.621474	5.68481e-20	4.34976e-17	356
GBM	FASLG	Th1	0.609334	4.58553e-19	4.14657e-16	356
GBM	FASLG	Th17	-0.196167	0.00948042	0.0438846	356
GBM	FASLG	Th2	0.616817	1.27984e-19	7.07256e-17	356
GBM	FASLG	Tr1	0.0796142	0.29636	0.585049	356
GBM	FASLG	iTreg	0.517921	2.5021e-13	2.39742e-10	356
GBM	FASLG	nTreg	0.471518	5.13043e-11	6.80432e-08	356
GBM	MLKL	Bcell	-0.479457	2.18201e-11	1.52849e-09	197259
GBM	MLKL	CD4_T	0.172874	0.0225409	0.0512081	197259
GBM	MLKL	CD4_naive	-0.223489	0.00303312	0.013568	197259
GBM	MLKL	CD8_T	0.0917594	0.228509	0.397339	197259
GBM	MLKL	CD8_naive	-0.494148	4.22813e-12	1.61448e-10	197259
GBM	MLKL	Central_memory	-0.219934	0.00354536	0.0354964	197259
GBM	MLKL	Cytotoxic	0.51534	3.43753e-13	2.11722e-11	197259
GBM	MLKL	DC	0.445486	7.29145e-10	3.06672e-08	197259
GBM	MLKL	Effector_memory	0.272089	0.000281233	0.00169541	197259
GBM	MLKL	Exhausted	0.358511	1.18903e-06	3.2763e-05	197259
GBM	MLKL	Gamma_delta	-0.177249	0.0192952	0.0708358	197259
GBM	MLKL	InfiltrationScore	0.625082	3.00311e-20	1.4327e-18	197259
GBM	MLKL	MAIT	0.289785	0.000105089	0.000913744	197259
GBM	MLKL	Macrophage	0.673249	2.51901e-24	1.47392e-22	197259
GBM	MLKL	Monocyte	0.286088	0.000129788	0.00116359	197259
GBM	MLKL	NK	0.36896	5.45045e-07	1.3554e-05	197259
GBM	MLKL	NKT	0.189586	0.0122259	0.10677	197259
GBM	MLKL	Neutrophil	-0.46667	8.55506e-11	3.5906e-09	197259
GBM	MLKL	Tfh	0.382789	1.85947e-07	8.09458e-06	197259
GBM	MLKL	Th1	0.440504	1.18183e-09	9.58471e-08	197259
GBM	MLKL	Th17	0.141646	0.0622679	0.165221	197259
GBM	MLKL	Th2	0.29838	6.3607e-05	0.00034555	197259
GBM	MLKL	Tr1	0.262922	0.000456506	0.0136402	197259
GBM	MLKL	iTreg	0.308114	3.5327e-05	0.000887374	197259
GBM	MLKL	nTreg	0.255646	0.000662488	0.00649558	197259
GBM	RIPK1	Bcell	-0.343433	3.4935e-06	3.6973e-05	8737
GBM	RIPK1	CD4_T	-0.00452338	0.952763	0.96834	8737
GBM	RIPK1	CD4_naive	-0.298871	6.178e-05	0.00233575	8737
GBM	RIPK1	CD8_T	-0.118001	0.120963	0.256304	8737
GBM	RIPK1	CD8_naive	-0.186996	0.0134851	0.0405052	8737
GBM	RIPK1	Central_memory	0.106542	0.161741	0.350045	8737
GBM	RIPK1	Cytotoxic	0.0806818	0.289909	0.465419	8737
GBM	RIPK1	DC	0.0613665	0.421164	0.569008	8737
GBM	RIPK1	Effector_memory	-0.0105559	0.890049	0.93186	8737
GBM	RIPK1	Exhausted	0.13172	0.0831765	0.179237	8737
GBM	RIPK1	Gamma_delta	-0.0363046	0.634362	0.779253	8737
GBM	RIPK1	InfiltrationScore	0.139464	0.0664508	0.139316	8737
GBM	RIPK1	MAIT	0.00222569	0.976747	0.985615	8737
GBM	RIPK1	Macrophage	0.314831	2.3258e-05	0.000105833	8737
GBM	RIPK1	Monocyte	0.393527	7.79108e-08	3.00859e-06	8737
GBM	RIPK1	NK	-0.135981	0.0735982	0.162612	8737
GBM	RIPK1	NKT	0.0904606	0.235191	0.521147	8737
GBM	RIPK1	Neutrophil	0.0209213	0.784076	0.857008	8737
GBM	RIPK1	Tfh	0.1145	0.132473	0.314892	8737
GBM	RIPK1	Th1	0.0667036	0.381839	0.624388	8737
GBM	RIPK1	Th17	0.312207	2.7416e-05	0.000538945	8737
GBM	RIPK1	Th2	0.033887	0.657111	0.749488	8737
GBM	RIPK1	Tr1	0.0483382	0.526473	0.763609	8737
GBM	RIPK1	iTreg	0.129898	0.0875677	0.281966	8737
GBM	RIPK1	nTreg	0.290123	0.000103064	0.00172879	8737
GBM	RIPK3	Bcell	-0.410172	1.9001e-08	4.45762e-07	11035
GBM	RIPK3	CD4_T	0.196171	0.00947907	0.0247899	11035
GBM	RIPK3	CD4_naive	-0.168238	0.0264826	0.0642728	11035
GBM	RIPK3	CD8_T	0.284	0.000146033	0.00221601	11035
GBM	RIPK3	CD8_naive	-0.547001	5.76036e-15	3.97905e-13	11035
GBM	RIPK3	Central_memory	-0.288091	0.000115804	0.00571663	11035
GBM	RIPK3	Cytotoxic	0.58199	3.69353e-17	6.56063e-15	11035
GBM	RIPK3	DC	0.607384	6.35992e-19	1.73321e-16	11035
GBM	RIPK3	Effector_memory	0.426315	4.48411e-09	2.57479e-07	11035
GBM	RIPK3	Exhausted	0.446866	6.36969e-10	2.01141e-07	11035
GBM	RIPK3	Gamma_delta	-0.247545	0.000990473	0.00777907	11035
GBM	RIPK3	InfiltrationScore	0.819558	1.86572e-43	8.63176e-41	11035
GBM	RIPK3	MAIT	0.393247	7.97293e-08	4.15218e-06	11035
GBM	RIPK3	Macrophage	0.786875	6.74169e-38	1.17648e-35	11035
GBM	RIPK3	Monocyte	0.151575	0.0458742	0.11925	11035
GBM	RIPK3	NK	0.490881	6.13169e-12	8.9694e-10	11035
GBM	RIPK3	NKT	0.186503	0.0137369	0.1134	11035
GBM	RIPK3	Neutrophil	-0.535866	2.54823e-14	2.39125e-12	11035
GBM	RIPK3	Tfh	0.458328	2.02458e-10	2.63191e-08	11035
GBM	RIPK3	Th1	0.464071	1.12171e-10	1.26075e-08	11035
GBM	RIPK3	Th17	-0.0974528	0.200801	0.369575	11035
GBM	RIPK3	Th2	0.478543	2.41042e-11	1.41038e-09	11035
GBM	RIPK3	Tr1	0.205375	0.00655602	0.0718665	11035
GBM	RIPK3	iTreg	0.352586	1.8282e-06	7.5145e-05	11035
GBM	RIPK3	nTreg	0.213212	0.00473181	0.0278298	11035
GBM	TLR3	Bcell	-0.270173	0.00031165	0.00167566	7098
GBM	TLR3	CD4_T	0.2577	0.000597008	0.00243129	7098
GBM	TLR3	CD4_naive	-0.256335	0.000639814	0.00526623	7098
GBM	TLR3	CD8_T	0.20494	0.00667354	0.032087	7098
GBM	TLR3	CD8_naive	-0.42366	5.71574e-09	1.21875e-07	7098
GBM	TLR3	Central_memory	0.00534382	0.944208	0.971808	7098
GBM	TLR3	Cytotoxic	0.243268	0.00121847	0.00751635	7098
GBM	TLR3	DC	0.376194	3.12483e-07	6.98488e-06	7098
GBM	TLR3	Effector_memory	0.321667	1.5041e-05	0.000158483	7098
GBM	TLR3	Exhausted	0.332215	7.51727e-06	0.000129816	7098
GBM	TLR3	Gamma_delta	-0.104654	0.169345	0.337468	7098
GBM	TLR3	InfiltrationScore	0.470973	5.43595e-11	1.17803e-09	7098
GBM	TLR3	MAIT	0.272924	0.000268869	0.00191031	7098
GBM	TLR3	Macrophage	0.47555	3.33245e-11	5.04533e-10	7098
GBM	TLR3	Monocyte	-0.0121872	0.873191	0.924383	7098
GBM	TLR3	NK	0.106624	0.161414	0.289739	7098
GBM	TLR3	NKT	0.108629	0.153634	0.423441	7098
GBM	TLR3	Neutrophil	-0.159289	0.0357774	0.0841046	7098
GBM	TLR3	Tfh	0.286365	0.000127768	0.00193934	7098
GBM	TLR3	Th1	0.405947	2.7385e-08	1.48446e-06	7098
GBM	TLR3	Th17	-0.161543	0.033209	0.106834	7098
GBM	TLR3	Th2	0.389831	1.05477e-07	1.52166e-06	7098
GBM	TLR3	Tr1	-0.0133421	0.861289	0.944361	7098
GBM	TLR3	iTreg	0.160454	0.0344303	0.155038	7098
GBM	TLR3	nTreg	0.135534	0.0745582	0.200386	7098
GBM	TNF	Bcell	-0.205641	0.00648484	0.0211179	7124
GBM	TNF	CD4_T	0.306147	3.9854e-05	0.000254362	7124
GBM	TNF	CD4_naive	0.176212	0.0200253	0.0520831	7124
GBM	TNF	CD8_T	0.296062	7.2943e-05	0.00135114	7124
GBM	TNF	CD8_naive	-0.263727	0.000437798	0.00233688	7124
GBM	TNF	Central_memory	-0.213172	0.00473997	0.0418147	7124
GBM	TNF	Cytotoxic	0.333433	6.92705e-06	9.9356e-05	7124
GBM	TNF	DC	0.15239	0.0447058	0.108013	7124
GBM	TNF	Effector_memory	0.261675	0.000486979	0.00264112	7124
GBM	TNF	Exhausted	0.33531	6.10278e-06	0.000112208	7124
GBM	TNF	Gamma_delta	-0.260863	0.000507788	0.00467033	7124
GBM	TNF	InfiltrationScore	0.448908	5.20921e-10	1.00802e-08	7124
GBM	TNF	MAIT	0.336356	5.68487e-06	9.6745e-05	7124
GBM	TNF	Macrophage	0.284787	0.000139705	0.00051959	7124
GBM	TNF	Monocyte	-0.148486	0.0505364	0.128115	7124
GBM	TNF	NK	0.507037	9.38081e-13	1.94398e-10	7124
GBM	TNF	NKT	0.128988	0.0898286	0.318888	7124
GBM	TNF	Neutrophil	-0.346284	2.86153e-06	2.9284e-05	7124
GBM	TNF	Tfh	0.298747	6.2236e-05	0.00108227	7124
GBM	TNF	Th1	0.278124	0.000202526	0.0038619	7124
GBM	TNF	Th17	-0.215906	0.00421909	0.0243642	7124
GBM	TNF	Th2	0.287481	0.00011991	0.000593551	7124
GBM	TNF	Tr1	0.0974043	0.201027	0.486161	7124
GBM	TNF	iTreg	0.143611	0.0586897	0.218867	7124
GBM	TNF	nTreg	-0.0147529	0.846793	0.919762	7124
HNSC	FADD	Bcell	-0.218354	1.54791e-07	1.03785e-06	8772
HNSC	FADD	CD4_T	-0.255938	6.46333e-10	2.62763e-09	8772
HNSC	FADD	CD4_naive	0.0112474	0.789469	0.910626	8772
HNSC	FADD	CD8_T	-0.101842	0.0153566	0.0374529	8772
HNSC	FADD	CD8_naive	0.0188512	0.65449	0.745626	8772
HNSC	FADD	Central_memory	-0.239868	7.53209e-09	3.58576e-08	8772
HNSC	FADD	Cytotoxic	-0.0783017	0.0626598	0.115058	8772
HNSC	FADD	DC	0.300885	2.62067e-13	5.54085e-12	8772
HNSC	FADD	Effector_memory	0.136168	0.00116415	0.00276014	8772
HNSC	FADD	Exhausted	0.0986867	0.0188556	0.0385539	8772
HNSC	FADD	Gamma_delta	-0.249609	1.73532e-09	9.13153e-09	8772
HNSC	FADD	InfiltrationScore	0.123772	0.00318316	0.00898102	8772
HNSC	FADD	MAIT	-0.0294036	0.485091	0.585366	8772
HNSC	FADD	Macrophage	0.177958	2.0587e-05	9.4716e-05	8772
HNSC	FADD	Monocyte	0.22006	1.23138e-07	1.40346e-06	8772
HNSC	FADD	NK	-0.0398386	0.344113	0.454423	8772
HNSC	FADD	NKT	0.136898	0.00109425	0.00321909	8772
HNSC	FADD	Neutrophil	0.139316	0.000889492	0.00207051	8772
HNSC	FADD	Tfh	-0.314733	1.76251e-14	1.6593e-13	8772
HNSC	FADD	Th1	0.112915	0.00716666	0.0161661	8772
HNSC	FADD	Th17	-0.125268	0.00283219	0.00798854	8772
HNSC	FADD	Th2	-0.030467	0.469435	0.577201	8772
HNSC	FADD	Tr1	-0.0819157	0.0514385	0.0834224	8772
HNSC	FADD	iTreg	-0.00296659	0.943858	0.957169	8772
HNSC	FADD	nTreg	0.225369	5.96914e-08	6.56541e-07	8772
HNSC	FAS	Bcell	0.0354201	0.400308	0.498787	355
HNSC	FAS	CD4_T	0.300337	2.90767e-13	1.64167e-12	355
HNSC	FAS	CD4_naive	-0.138945	0.000918476	0.0127673	355
HNSC	FAS	CD8_T	0.229602	3.30791e-08	3.56433e-07	355
HNSC	FAS	CD8_naive	-0.243216	4.58014e-09	7.48288e-08	355
HNSC	FAS	Central_memory	0.285415	4.52662e-12	3.33376e-11	355
HNSC	FAS	Cytotoxic	0.443144	1.26286e-28	3.94092e-27	355
HNSC	FAS	DC	0.0287639	0.494642	0.584865	355
HNSC	FAS	Effector_memory	-0.0751765	0.0739242	0.115802	355
HNSC	FAS	Exhausted	0.302061	2.09509e-13	3.93745e-12	355
HNSC	FAS	Gamma_delta	0.271957	4.69852e-11	3.06057e-10	355
HNSC	FAS	InfiltrationScore	0.253204	9.93589e-10	9.04521e-09	355
HNSC	FAS	MAIT	-0.12082	0.00399437	0.0104918	355
HNSC	FAS	Macrophage	0.220766	1.11947e-07	7.72461e-07	355
HNSC	FAS	Monocyte	-0.14991	0.000345129	0.00152174	355
HNSC	FAS	NK	0.248224	2.1465e-09	2.21336e-08	355
HNSC	FAS	NKT	-0.145609	0.000510788	0.00163686	355
HNSC	FAS	Neutrophil	-0.454571	3.28893e-30	8.00478e-29	355
HNSC	FAS	Tfh	0.410832	1.85421e-24	3.84362e-23	355
HNSC	FAS	Th1	0.330658	6.61002e-16	1.62054e-14	355
HNSC	FAS	Th17	-0.260066	3.34493e-10	4.11784e-09	355
HNSC	FAS	Th2	0.0400202	0.341916	0.452978	355
HNSC	FAS	Tr1	0.202602	1.17456e-06	4.20592e-06	355
HNSC	FAS	iTreg	0.363115	4.41079e-19	5.95043e-18	355
HNSC	FAS	nTreg	0.208473	5.61976e-07	4.60189e-06	355
HNSC	FASLG	Bcell	0.195536	2.77256e-06	1.4207e-05	356
HNSC	FASLG	CD4_T	0.322151	3.91194e-15	2.6021e-14	356
HNSC	FASLG	CD4_naive	-0.388978	6.92046e-22	1.39295e-18	356
HNSC	FASLG	CD8_T	0.711113	2.41743e-88	1.87146e-85	356
HNSC	FASLG	CD8_naive	-0.411516	1.5295e-24	1.14021e-21	356
HNSC	FASLG	Central_memory	0.331533	5.48701e-16	7.17159e-15	356
HNSC	FASLG	Cytotoxic	0.815272	6.28493e-136	8.43354e-133	356
HNSC	FASLG	DC	-0.0351667	0.403689	0.496969	356
HNSC	FASLG	Effector_memory	0.096444	0.0217472	0.0392616	356
HNSC	FASLG	Exhausted	0.654103	2.12352e-70	2.03534e-67	356
HNSC	FASLG	Gamma_delta	0.527253	8.13353e-42	3.99297e-39	356
HNSC	FASLG	InfiltrationScore	0.525367	1.77107e-41	7.66627e-40	356
HNSC	FASLG	MAIT	-0.0976194	0.020187	0.0419756	356
HNSC	FASLG	Macrophage	0.242825	4.85633e-09	4.15773e-08	356
HNSC	FASLG	Monocyte	-0.390237	4.97872e-22	8.17013e-20	356
HNSC	FASLG	NK	0.687596	1.9396e-80	3.25335e-77	356
HNSC	FASLG	NKT	-0.297372	5.08203e-13	1.10705e-11	356
HNSC	FASLG	Neutrophil	-0.703205	1.34406e-85	1.8787e-83	356
HNSC	FASLG	Tfh	0.72153	4.19293e-92	9.59039e-90	356
HNSC	FASLG	Th1	0.740935	1.37263e-99	1.6252e-96	356
HNSC	FASLG	Th17	-0.540041	3.65406e-44	8.55221e-42	356
HNSC	FASLG	Th2	0.243631	4.30426e-09	1.97799e-07	356
HNSC	FASLG	Tr1	0.188216	6.53604e-06	2.1315e-05	356
HNSC	FASLG	iTreg	0.461348	3.53793e-31	1.79374e-29	356
HNSC	FASLG	nTreg	0.164966	8.0457e-05	0.000353729	356
HNSC	MLKL	Bcell	-0.024951	0.553593	0.64432	197259
HNSC	MLKL	CD4_T	-0.0158059	0.707493	0.75183	197259
HNSC	MLKL	CD4_naive	-0.215703	2.20089e-07	7.33435e-06	197259
HNSC	MLKL	CD8_T	0.295396	7.34562e-13	1.46971e-11	197259
HNSC	MLKL	CD8_naive	-0.342538	5.01931e-17	5.39393e-15	197259
HNSC	MLKL	Central_memory	0.077726	0.0646214	0.0973141	197259
HNSC	MLKL	Cytotoxic	0.451854	7.92824e-30	2.60326e-28	197259
HNSC	MLKL	DC	0.207398	6.44255e-07	3.45986e-06	197259
HNSC	MLKL	Effector_memory	0.064928	0.122855	0.18071	197259
HNSC	MLKL	Exhausted	0.412502	1.15814e-24	4.98099e-23	197259
HNSC	MLKL	Gamma_delta	0.0833983	0.0473476	0.0717307	197259
HNSC	MLKL	InfiltrationScore	0.398896	4.97182e-23	1.12315e-21	197259
HNSC	MLKL	MAIT	0.0732936	0.0814735	0.136875	197259
HNSC	MLKL	Macrophage	0.298566	4.06151e-13	6.23096e-12	197259
HNSC	MLKL	Monocyte	-0.0985335	0.0190417	0.047265	197259
HNSC	MLKL	NK	0.344221	3.45174e-17	8.7723e-16	197259
HNSC	MLKL	NKT	-0.0269573	0.522152	0.621665	197259
HNSC	MLKL	Neutrophil	-0.158998	0.000145567	0.000389987	197259
HNSC	MLKL	Tfh	0.218272	1.56491e-07	6.49455e-07	197259
HNSC	MLKL	Th1	0.483207	1.87796e-34	1.35482e-32	197259
HNSC	MLKL	Th17	-0.322244	3.83778e-15	8.57346e-14	197259
HNSC	MLKL	Th2	0.00537102	0.898545	0.929503	197259
HNSC	MLKL	Tr1	0.0261714	0.534358	0.617071	197259
HNSC	MLKL	iTreg	0.178592	1.9213e-05	5.1398e-05	197259
HNSC	MLKL	nTreg	0.206423	7.28728e-07	5.76339e-06	197259
HNSC	RIPK1	Bcell	0.137392	0.00104921	0.00293885	8737
HNSC	RIPK1	CD4_T	0.132402	0.00159463	0.00294088	8737
HNSC	RIPK1	CD4_naive	-0.0694459	0.0988386	0.322331	8737
HNSC	RIPK1	CD8_T	0.20462	9.13884e-07	7.32617e-06	8737
HNSC	RIPK1	CD8_naive	-0.0572981	0.173429	0.265849	8737
HNSC	RIPK1	Central_memory	0.209888	4.68968e-07	1.71034e-06	8737
HNSC	RIPK1	Cytotoxic	0.171054	4.3007e-05	0.000194875	8737
HNSC	RIPK1	DC	-0.070104	0.0956753	0.148638	8737
HNSC	RIPK1	Effector_memory	0.0959343	0.0224557	0.0403418	8737
HNSC	RIPK1	Exhausted	0.121516	0.00378795	0.00950198	8737
HNSC	RIPK1	Gamma_delta	0.0947556	0.0241712	0.0391469	8737
HNSC	RIPK1	InfiltrationScore	0.0124971	0.766719	0.835862	8737
HNSC	RIPK1	MAIT	-0.0328501	0.435385	0.538096	8737
HNSC	RIPK1	Macrophage	-0.0367733	0.38254	0.498915	8737
HNSC	RIPK1	Monocyte	-0.222933	8.3404e-08	9.82878e-07	8737
HNSC	RIPK1	NK	0.0325662	0.439364	0.548776	8737
HNSC	RIPK1	NKT	-0.117772	0.00502435	0.0122671	8737
HNSC	RIPK1	Neutrophil	-0.168777	5.4502e-05	0.000156987	8737
HNSC	RIPK1	Tfh	0.223739	7.4698e-08	3.23547e-07	8737
HNSC	RIPK1	Th1	0.173836	3.2071e-05	0.000129492	8737
HNSC	RIPK1	Th17	-0.0892325	0.0337998	0.0682644	8737
HNSC	RIPK1	Th2	-0.127391	0.00239421	0.0083116	8737
HNSC	RIPK1	Tr1	0.119811	0.00431197	0.00891448	8737
HNSC	RIPK1	iTreg	0.273715	3.48658e-11	1.86792e-10	8737
HNSC	RIPK1	nTreg	0.132635	0.0015642	0.00469915	8737
HNSC	RIPK3	Bcell	0.092356	0.0280163	0.0529097	11035
HNSC	RIPK3	CD4_T	0.169817	4.8931e-05	0.000111702	11035
HNSC	RIPK3	CD4_naive	0.0075376	0.857992	0.941023	11035
HNSC	RIPK3	CD8_T	0.199987	1.61978e-06	1.2315e-05	11035
HNSC	RIPK3	CD8_naive	-0.137547	0.00103543	0.00362265	11035
HNSC	RIPK3	Central_memory	0.107367	0.0105856	0.0189865	11035
HNSC	RIPK3	Cytotoxic	0.10382	0.013467	0.0312286	11035
HNSC	RIPK3	DC	-0.0416441	0.322671	0.413176	11035
HNSC	RIPK3	Effector_memory	-0.0121063	0.773812	0.825094	11035
HNSC	RIPK3	Exhausted	-0.00221138	0.958135	0.971104	11035
HNSC	RIPK3	Gamma_delta	0.118772	0.00466275	0.00879751	11035
HNSC	RIPK3	InfiltrationScore	0.0612341	0.145683	0.234979	11035
HNSC	RIPK3	MAIT	0.205537	8.14625e-07	5.93012e-06	11035
HNSC	RIPK3	Macrophage	-0.07101	0.091454	0.157359	11035
HNSC	RIPK3	Monocyte	-0.184069	1.0473e-05	7.1018e-05	11035
HNSC	RIPK3	NK	0.128659	0.00216307	0.00627263	11035
HNSC	RIPK3	NKT	0.00775555	0.853931	0.896833	11035
HNSC	RIPK3	Neutrophil	-0.162828	9.9731e-05	0.000275627	11035
HNSC	RIPK3	Tfh	0.255359	7.08215e-10	4.01322e-09	11035
HNSC	RIPK3	Th1	0.022687	0.590151	0.676802	11035
HNSC	RIPK3	Th17	0.0640803	0.12783	0.207213	11035
HNSC	RIPK3	Th2	0.00175867	0.9667	0.977432	11035
HNSC	RIPK3	Tr1	-0.0144856	0.730936	0.790728	11035
HNSC	RIPK3	iTreg	0.0185049	0.660438	0.723602	11035
HNSC	RIPK3	nTreg	-0.0833978	0.047349	0.0872189	11035
HNSC	TLR3	Bcell	0.057552	0.171527	0.248135	7098
HNSC	TLR3	CD4_T	0.198673	1.90084e-06	5.20333e-06	7098
HNSC	TLR3	CD4_naive	-0.23686	1.17034e-08	4.76855e-07	7098
HNSC	TLR3	CD8_T	0.246949	2.6073e-09	3.40336e-08	7098
HNSC	TLR3	CD8_naive	-0.28635	3.82929e-12	1.34984e-10	7098
HNSC	TLR3	Central_memory	0.34182	5.88347e-17	9.0261e-16	7098
HNSC	TLR3	Cytotoxic	0.422978	5.68208e-26	1.62687e-24	7098
HNSC	TLR3	DC	-0.0582351	0.16649	0.237719	7098
HNSC	TLR3	Effector_memory	0.0515834	0.220458	0.296438	7098
HNSC	TLR3	Exhausted	0.238838	8.76471e-09	7.89687e-08	7098
HNSC	TLR3	Gamma_delta	0.240434	6.92862e-09	3.34997e-08	7098
HNSC	TLR3	InfiltrationScore	0.149707	0.000351657	0.00126939	7098
HNSC	TLR3	MAIT	0.00373151	0.929416	0.948453	7098
HNSC	TLR3	Macrophage	0.102211	0.0149876	0.0338233	7098
HNSC	TLR3	Monocyte	-0.237058	1.13715e-08	1.64665e-07	7098
HNSC	TLR3	NK	0.234543	1.6368e-08	1.44245e-07	7098
HNSC	TLR3	NKT	-0.183294	1.1424e-05	5.5104e-05	7098
HNSC	TLR3	Neutrophil	-0.342593	4.9586e-17	5.70324e-16	7098
HNSC	TLR3	Tfh	0.40227	1.98904e-23	3.80203e-22	7098
HNSC	TLR3	Th1	0.362566	5.02729e-19	1.57126e-17	7098
HNSC	TLR3	Th17	-0.213803	2.82472e-07	2.05628e-06	7098
HNSC	TLR3	Th2	0.00573497	0.891712	0.924871	7098
HNSC	TLR3	Tr1	0.0831744	0.0479473	0.078392	7098
HNSC	TLR3	iTreg	0.351793	6.23015e-18	7.36783e-17	7098
HNSC	TLR3	nTreg	0.14503	0.000538075	0.00186281	7098
HNSC	TNF	Bcell	-0.0343396	0.414844	0.51274	7124
HNSC	TNF	CD4_T	0.106997	0.0108583	0.0174635	7124
HNSC	TNF	CD4_naive	-0.0592705	0.159069	0.417504	7124
HNSC	TNF	CD8_T	0.139329	0.000888549	0.00325769	7124
HNSC	TNF	CD8_naive	-0.0462633	0.271858	0.382045	7124
HNSC	TNF	Central_memory	0.0585103	0.164493	0.221763	7124
HNSC	TNF	Cytotoxic	0.118393	0.00479706	0.0128347	7124
HNSC	TNF	DC	0.103182	0.0140529	0.027854	7124
HNSC	TNF	Effector_memory	-0.089887	0.0325102	0.0561349	7124
HNSC	TNF	Exhausted	0.134483	0.00134145	0.00378162	7124
HNSC	TNF	Gamma_delta	-0.0345799	0.411584	0.480978	7124
HNSC	TNF	InfiltrationScore	0.118684	0.00469375	0.0126186	7124
HNSC	TNF	MAIT	-0.0701428	0.0954915	0.156353	7124
HNSC	TNF	Macrophage	0.0296531	0.481392	0.594372	7124
HNSC	TNF	Monocyte	-0.155513	0.000203843	0.000962735	7124
HNSC	TNF	NK	0.147458	0.000432126	0.00149473	7124
HNSC	TNF	NKT	0.0545179	0.19528	0.283689	7124
HNSC	TNF	Neutrophil	-0.10746	0.0105183	0.0197014	7124
HNSC	TNF	Tfh	0.134285	0.00136381	0.00303324	7124
HNSC	TNF	Th1	0.142535	0.000671642	0.00198631	7124
HNSC	TNF	Th17	-0.0418993	0.319712	0.431948	7124
HNSC	TNF	Th2	-0.00349825	0.933818	0.954089	7124
HNSC	TNF	Tr1	0.16992	4.8412e-05	0.000139166	7124
HNSC	TNF	iTreg	0.234438	1.66168e-08	6.44436e-08	7124
[truncated: 4,601 more rows]
