# Supplementary material for: Multi-omics analysis reveals the panoramic picture of necroptosis-related regulators in pan-cancer
Source: Aging (Albany NY). 2022 Jun 21;14(12):5034–58. doi: 10.18632/aging.204124 (PMC9271292; doi:10.18632/aging.204124)
Supplement: Supplementary Material 16 [file aging-14-204124-s016.xlsx]

## Sheet: SheetName
cancertype	pathway	estimate	p_value	fdr	alternative	statistic
ACC	Apoptosis	-0.431391	0.00299659	0.0239727	two.sided	23210
ACC	CellCycle	-0.55128	9.3861e-05	0.000938607	two.sided	25154
ACC	DNADamage	-0.310392	0.0362285	0.189415	two.sided	21248
ACC	EMT	-0.228986	0.125667	0.33865	two.sided	19928
ACC	Hormone AR	-0.236879	0.112883	0.33865	two.sided	20056
ACC	Hormone ER	0.358989	0.0147335	0.103135	two.sided	10394
ACC	PI3KAKT	0.131422	0.382761	0.382761	two.sided	14084
ACC	RASMAPK	0.540426	0.000135136	0.00121623	two.sided	7452
ACC	RTK	0.284243	0.0558994	0.223598	two.sided	11606
ACC	TSCmTOR	0.318286	0.0315691	0.189415	two.sided	11054
BLCA	Apoptosis	0.312827	4.53142e-09	4.07827e-08	two.sided	4501400
BLCA	CellCycle	-0.167801	0.00192819	0.0115691	two.sided	7649808
BLCA	DNADamage	-0.312801	4.54527e-09	4.07827e-08	two.sided	8599650
BLCA	EMT	0.196268	0.000278465	0.00194925	two.sided	5264932
BLCA	Hormone AR	-0.405876	3.18141e-15	3.18141e-14	two.sided	9209344
BLCA	Hormone ER	0.0840429	0.121896	0.609481	two.sided	6000078
BLCA	PI3KAKT	0.0275409	0.612646	0.958759	two.sided	6370200
BLCA	RASMAPK	0.0821493	0.130554	0.609481	two.sided	6012482
BLCA	RTK	-0.0593151	0.275275	0.825825	two.sided	6939160
BLCA	TSCmTOR	0.0384694	0.479379	0.958759	two.sided	6298612
BRCA	Apoptosis	0.259656	3.283e-15	3.283e-14	two.sided	8.75742e+07
BRCA	CellCycle	0.00525994	0.875342	1	two.sided	1.17666e+08
BRCA	DNADamage	-0.0442374	0.186834	0.747335	two.sided	1.23521e+08
BRCA	EMT	0.0839187	0.0121672	0.0730033	two.sided	1.08362e+08
BRCA	Hormone AR	-0.0986188	0.00319376	0.0287439	two.sided	1.29954e+08
BRCA	Hormone ER	-0.0785074	0.0190238	0.095119	two.sided	1.27575e+08
BRCA	PI3KAKT	0.020531	0.540279	1	two.sided	1.1586e+08
BRCA	RASMAPK	0.0880857	0.0084827	0.0593789	two.sided	1.07869e+08
BRCA	RTK	0.0254476	0.447802	1	two.sided	1.15278e+08
BRCA	TSCmTOR	0.0920295	0.00594911	0.0475929	two.sided	1.07403e+08
CESC	Apoptosis	0.317966	2.4881e-05	0.000248814	two.sided	568366
CESC	CellCycle	0.021523	0.779713	1	two.sided	815404
CESC	DNADamage	-0.125183	0.102773	0.691837	two.sided	937660
CESC	EMT	0.00847433	0.912325	1	two.sided	826278
CESC	Hormone AR	-0.0494372	0.520418	1	two.sided	874538
CESC	Hormone ER	0.019975	0.795193	1	two.sided	816694
CESC	PI3KAKT	-0.12663	0.0988339	0.691837	two.sided	938866
CESC	RASMAPK	0.206178	0.0069076	0.0621684	two.sided	661524
CESC	RTK	0.157708	0.0394833	0.315866	two.sided	701916
CESC	TSCmTOR	0.101171	0.187762	0.938812	two.sided	749030
CHOL	Apoptosis	-0.0380423	0.841714	1	two.sided	4666
CHOL	CellCycle	-0.12525	0.508017	1	two.sided	5058
CHOL	DNADamage	0.0126808	0.947562	1	two.sided	4438
CHOL	EMT	-0.0727475	0.701551	1	two.sided	4822
CHOL	Hormone AR	-0.191991	0.30805	1	two.sided	5358
CHOL	Hormone ER	-0.0665184	0.726146	1	two.sided	4794
CHOL	PI3KAKT	0.136374	0.470781	1	two.sided	3882
CHOL	RASMAPK	0.358843	0.0521961	0.480291	two.sided	2882
CHOL	RTK	0.365072	0.0480291	0.480291	two.sided	2854
CHOL	TSCmTOR	0.146162	0.43925	1	two.sided	3838
COAD	Apoptosis	0.183426	0.00419652	0.0293756	two.sided	1.92878e+06
COAD	CellCycle	0.0486707	0.451051	1	two.sided	2.24708e+06
COAD	DNADamage	-0.279085	1.0484e-05	0.000104839	two.sided	3.02125e+06
COAD	EMT	-0.168532	0.00861438	0.0516863	two.sided	2.76012e+06
COAD	Hormone AR	-0.0109664	0.865232	1	two.sided	2.38794e+06
COAD	Hormone ER	-0.000700242	0.991354	1	two.sided	2.3637e+06
COAD	PI3KAKT	0.0685242	0.288365	1	two.sided	2.20018e+06
COAD	RASMAPK	0.244749	0.000119894	0.000959149	two.sided	1.78393e+06
COAD	RTK	0.266558	2.652e-05	0.000238676	two.sided	1.73242e+06
COAD	TSCmTOR	0.133036	0.0386358	0.193179	two.sided	2.0478e+06
DLBC	Apoptosis	0.296457	0.0940933	0.376373	two.sided	4210
DLBC	CellCycle	-0.32119	0.0688234	0.34871	two.sided	7906
DLBC	DNADamage	-0.466912	0.00666809	0.0533447	two.sided	8778
DLBC	EMT	-0.203543	0.254815	0.70425	two.sided	7202
DLBC	Hormone AR	-0.33389	0.0581184	0.34871	two.sided	7982
DLBC	Hormone ER	0.502005	0.00327119	0.0294407	two.sided	2980
DLBC	PI3KAKT	0.168115	0.34824	0.70425	two.sided	4978
DLBC	RASMAPK	0.212233	0.23475	0.70425	two.sided	4714
DLBC	RTK	0.350936	0.0458877	0.321214	two.sided	3884
DLBC	TSCmTOR	0.527406	0.00186826	0.0186826	two.sided	2828
ESCA	Apoptosis	0.302618	0.000636548	0.00636548	two.sided	226998
ESCA	CellCycle	0.0576651	0.522469	1	two.sided	306730
ESCA	DNADamage	-0.0467834	0.603941	1	two.sided	340728
ESCA	EMT	0.0460215	0.609851	1	two.sided	310520
ESCA	Hormone AR	0.00584946	0.94833	1	two.sided	323596
ESCA	Hormone ER	0.116055	0.197172	1	two.sided	287724
ESCA	PI3KAKT	0.0321229	0.72177	1	two.sided	315044
ESCA	RASMAPK	0.245831	0.00583284	0.0524955	two.sided	245482
ESCA	RTK	0.138427	0.123575	0.978437	two.sided	280442
ESCA	TSCmTOR	0.138894	0.122305	0.978437	two.sided	280290
GBM	Apoptosis	0.0433372	0.706366	1	two.sided	75651.9
GBM	CellCycle	-0.265575	0.0187737	0.168963	two.sided	100080
GBM	DNADamage	-0.208492	0.0669802	0.45969	two.sided	95566.3
GBM	EMT	0.209478	0.0656699	0.45969	two.sided	62513.7
GBM	Hormone AR	0.0902532	0.431966	1	two.sided	71941.9
GBM	Hormone ER	-0.0830704	0.469641	1	two.sided	85648.1
GBM	PI3KAKT	-0.225235	0.0474056	0.379245	two.sided	96890.3
GBM	RASMAPK	0.360596	0.00118226	0.0118226	two.sided	50563.5
GBM	RTK	-0.158743	0.165087	0.825434	two.sided	91632.2
GBM	TSCmTOR	-0.124979	0.275606	1	two.sided	88962.2
HNSC	Apoptosis	0.332496	1.66102e-10	1.66102e-09	two.sided	4.81083e+06
HNSC	CellCycle	0.0479558	0.37038	1	two.sided	6.86157e+06
HNSC	DNADamage	-0.235917	7.91955e-06	7.1276e-05	two.sided	8.9075e+06
HNSC	EMT	0.202982	0.000128544	0.00089981	two.sided	5.74427e+06
HNSC	Hormone AR	-0.0611626	0.253095	1	two.sided	7.64801e+06
HNSC	Hormone ER	0.00764638	0.886491	1	two.sided	7.15209e+06
HNSC	PI3KAKT	-0.104647	0.0501178	0.250589	two.sided	7.96142e+06
HNSC	RASMAPK	0.10919	0.0409056	0.245434	two.sided	6.42025e+06
HNSC	RTK	0.0268475	0.616172	1	two.sided	7.0137e+06
HNSC	TSCmTOR	0.212539	5.9782e-05	0.000478258	two.sided	5.67539e+06
KICH	Apoptosis	-0.093366	0.465757	0.465757	two.sided	45554
KICH	CellCycle	-0.33847	0.0069107	0.0483749	two.sided	55766
KICH	DNADamage	0.185724	0.144765	0.289529	two.sided	33926
KICH	EMT	-0.363767	0.00356783	0.0285426	two.sided	56820
KICH	Hormone AR	-0.435436	0.000410675	0.00410675	two.sided	59806
KICH	Hormone ER	0.243616	0.0545758	0.218303	two.sided	31514
KICH	PI3KAKT	0.413978	0.00082275	0.00740475	two.sided	24416
KICH	RASMAPK	0.303811	0.0158094	0.0882635	two.sided	29006
KICH	RTK	0.30698	0.0147106	0.0882635	two.sided	28874
KICH	TSCmTOR	0.224702	0.076746	0.230238	two.sided	32302
KIRC	Apoptosis	-0.0879127	0.0552763	0.331658	two.sided	1.95552e+07
KIRC	CellCycle	-0.134909	0.00318682	0.0286814	two.sided	2.03999e+07
KIRC	DNADamage	-0.114696	0.0122774	0.0859418	two.sided	2.00366e+07
KIRC	EMT	-0.0200812	0.662103	1	two.sided	1.83359e+07
KIRC	Hormone AR	-0.00328424	0.943027	1	two.sided	1.8034e+07
KIRC	Hormone ER	0.000720892	0.987484	1	two.sided	1.7962e+07
KIRC	PI3KAKT	-0.0121344	0.791737	1	two.sided	1.81931e+07
KIRC	RASMAPK	0.128826	0.00487766	0.0390213	two.sided	1.56593e+07
KIRC	RTK	0.198595	1.2712e-05	0.000127123	two.sided	1.44052e+07
KIRC	TSCmTOR	0.0245139	0.593685	1	two.sided	1.75343e+07
KIRP	Apoptosis	0.0664167	0.332418	0.997255	two.sided	1.54635e+06
KIRP	CellCycle	-0.223177	0.000984201	0.00984201	two.sided	2.02602e+06
KIRP	DNADamage	-0.215977	0.00144217	0.0129796	two.sided	2.0141e+06
KIRP	EMT	-0.0587203	0.391594	0.997255	two.sided	1.75362e+06
KIRP	Hormone AR	-0.151802	0.0260284	0.156171	two.sided	1.9078e+06
KIRP	Hormone ER	0.0636867	0.352718	0.997255	two.sided	1.55087e+06
KIRP	PI3KAKT	0.187742	0.00575567	0.0460454	two.sided	1.34539e+06
KIRP	RASMAPK	0.182396	0.00733157	0.051321	two.sided	1.35425e+06
KIRP	RTK	0.125994	0.0651794	0.260717	two.sided	1.44767e+06
KIRP	TSCmTOR	0.147974	0.0300804	0.156171	two.sided	1.41126e+06
LGG	Apoptosis	0.12907	0.00640117	0.038407	two.sided	1.27912e+07
LGG	CellCycle	0.167152	0.000398457	0.00318766	two.sided	1.22319e+07
LGG	DNADamage	0.0809801	0.0879568	0.145655	two.sided	1.34974e+07
LGG	EMT	0.107014	0.023971	0.0735493	two.sided	1.31151e+07
LGG	Hormone AR	0.114488	0.0156794	0.0735493	two.sided	1.30053e+07
LGG	Hormone ER	0.257367	3.65146e-08	3.28631e-07	two.sided	1.09069e+07
LGG	PI3KAKT	0.158663	0.000782542	0.0054778	two.sided	1.23565e+07
LGG	RASMAPK	0.291546	3.62031e-10	3.62031e-09	two.sided	1.04049e+07
LGG	RTK	0.0851245	0.0728275	0.145655	two.sided	1.34366e+07
LGG	TSCmTOR	-0.115578	0.0147099	0.0735493	two.sided	1.63842e+07
LIHC	Apoptosis	-0.00698804	0.92555	1	two.sided	995166
LIHC	CellCycle	-0.087647	0.240444	1	two.sided	1074878
LIHC	DNADamage	-0.0129359	0.862655	1	two.sided	1001044
LIHC	EMT	0.0024528	0.973842	1	two.sided	985836
LIHC	Hormone AR	0.225936	0.00227548	0.0182038	two.sided	764976
LIHC	Hormone ER	0.278985	0.000151455	0.00151455	two.sided	712550
LIHC	PI3KAKT	0.0212758	0.775988	1	two.sided	967234
LIHC	RASMAPK	0.263447	0.000354928	0.00319435	two.sided	727906
LIHC	RTK	0.205537	0.0055828	0.0390796	two.sided	785136
LIHC	TSCmTOR	0.0213243	0.77549	1	two.sided	967186
LUAD	Apoptosis	-0.0110829	0.833556	0.833556	two.sided	7.99389e+06
LUAD	CellCycle	-0.257563	6.77953e-07	6.77953e-06	two.sided	9.94262e+06
LUAD	DNADamage	-0.144132	0.0060112	0.0495156	two.sided	9.04581e+06
LUAD	EMT	0.127005	0.0156114	0.0936686	two.sided	6.90213e+06
LUAD	Hormone AR	0.0484543	0.357961	0.715922	two.sided	7.52317e+06
LUAD	Hormone ER	0.100962	0.0549601	0.224705	two.sided	7.10803e+06
LUAD	PI3KAKT	-0.0873715	0.0969582	0.290874	two.sided	8.59704e+06
LUAD	RASMAPK	0.145633	0.00550173	0.0495156	two.sided	6.75485e+06
LUAD	RTK	0.138666	0.0082432	0.0577024	two.sided	6.80993e+06
LUAD	TSCmTOR	-0.105462	0.0449409	0.224705	two.sided	8.74007e+06
LUSC	Apoptosis	0.243262	9.78801e-06	9.788e-05	two.sided	4329524
LUSC	CellCycle	-0.0284386	0.609302	1	two.sided	5884006
LUSC	DNADamage	-0.169719	0.0021658	0.0129948	two.sided	6692316
LUSC	EMT	0.17749	0.00133384	0.00933687	two.sided	4705824
LUSC	Hormone AR	0.0665691	0.231252	0.925009	two.sided	5340438
LUSC	Hormone ER	0.206614	0.000181619	0.00157261	two.sided	4539202
LUSC	PI3KAKT	-0.20714	0.000174735	0.00157261	two.sided	6906408
LUSC	RASMAPK	0.0401814	0.470165	1	two.sided	5491410
LUSC	RTK	0.018996	0.732842	1	two.sided	5612618
LUSC	TSCmTOR	-0.136252	0.0140134	0.0700668	two.sided	6500838
MESO	Apoptosis	0.0700365	0.584582	1	two.sided	38746
MESO	CellCycle	-0.121928	0.340236	1	two.sided	46744
MESO	DNADamage	-0.25	0.0483981	0.483981	two.sided	52080
MESO	EMT	-0.157738	0.216379	1	two.sided	48236
MESO	Hormone AR	-0.104311	0.414925	1	two.sided	46010
MESO	Hormone ER	0.123608	0.333585	1	two.sided	36514
MESO	PI3KAKT	-0.0947581	0.459109	1	two.sided	45612
MESO	RASMAPK	0.100422	0.432604	1	two.sided	37480
MESO	RTK	0.230607	0.0691619	0.622457	two.sided	32056
MESO	TSCmTOR	0.163306	0.200439	1	two.sided	34860
OV	Apoptosis	0.129447	0.0438038	0.306626	two.sided	2.08188e+06
OV	CellCycle	-0.111945	0.0815896	0.489538	two.sided	2.65916e+06
OV	DNADamage	-0.369056	2.95353e-09	2.95353e-08	two.sided	3.27402e+06
OV	EMT	-0.04079	0.526839	1	two.sided	2.48899e+06
OV	Hormone AR	-0.21908	0.000583037	0.00524733	two.sided	2.91536e+06
OV	Hormone ER	-0.0461567	0.473878	1	two.sided	2.50183e+06
OV	PI3KAKT	-0.094438	0.142149	0.710746	two.sided	2.61729e+06
OV	RASMAPK	0.179527	0.00500109	0.0400087	two.sided	1.96211e+06
OV	RTK	0.0260391	0.686297	1	two.sided	2.32917e+06
OV	TSCmTOR	-0.0256728	0.690482	1	two.sided	2.45284e+06
PAAD	Apoptosis	0.309022	0.000778444	0.007006	two.sided	179744
PAAD	CellCycle	0.0843348	0.36755	1	two.sided	238192
PAAD	DNADamage	-0.153193	0.100601	0.603607	two.sided	299980
PAAD	EMT	-0.0660747	0.480439	1	two.sided	277318
PAAD	Hormone AR	0.01683	0.857502	1	two.sided	255752
PAAD	Hormone ER	0.0267789	0.775074	1	two.sided	253164
PAAD	PI3KAKT	-0.31465	0.000616941	0.00616941	two.sided	341980
PAAD	RASMAPK	0.0956906	0.306399	1	two.sided	235238
PAAD	RTK	0.20266	0.0292859	0.234287	two.sided	207412
PAAD	TSCmTOR	-0.175689	0.0593256	0.415279	two.sided	305832
PCPG	Apoptosis	-0.128464	0.244188	1	two.sided	111458
PCPG	CellCycle	-0.45495	1.3754e-05	0.000137543	two.sided	143705
PCPG	DNADamage	-0.140027	0.203941	1	two.sided	112600
PCPG	EMT	0.422165	6.3366e-05	0.000570298	two.sided	57072.7
PCPG	Hormone AR	-0.317171	0.0032857	0.0262856	two.sided	130097
PCPG	Hormone ER	0.0419573	0.704725	1	two.sided	94625.9
PCPG	PI3KAKT	0.107141	0.332023	1	two.sided	88187.7
PCPG	RASMAPK	0.0606275	0.583802	1	two.sided	92781.8
PCPG	RTK	0.013466	0.903236	1	two.sided	97440
PCPG	TSCmTOR	0.0845424	0.444507	1	two.sided	90419.7
PRAD	Apoptosis	-0.120447	0.0238226	0.0714678	two.sided	8.1445e+06
PRAD	CellCycle	-0.0960351	0.0719347	0.143869	two.sided	7.96705e+06
PRAD	DNADamage	-0.139365	0.00883928	0.0441964	two.sided	8.28202e+06
PRAD	EMT	0.136971	0.0100879	0.0441964	two.sided	6.27334e+06
PRAD	Hormone AR	-0.183133	0.000554576	0.00332746	two.sided	8.60017e+06
PRAD	Hormone ER	0.0948782	0.0754445	0.143869	two.sided	6.57931e+06
PRAD	PI3KAKT	0.210635	6.817e-05	0.000545363	two.sided	5.73787e+06
PRAD	RASMAPK	0.209898	7.2378e-05	0.000545363	two.sided	5.74323e+06
PRAD	RTK	0.233086	9.93719e-06	8.9435e-05	two.sided	5.57468e+06
PRAD	TSCmTOR	0.269605	2.81156e-07	2.81156e-06	two.sided	5.30922e+06
READ	Apoptosis	0.00155499	0.989509	1	two.sided	67420
READ	CellCycle	-0.0737658	0.53223	1	two.sided	72506
READ	DNADamage	-0.388851	0.00061733	0.0061733	two.sided	93782.2
READ	EMT	-0.137417	0.242997	1	two.sided	76804.1
READ	Hormone AR	-0.0790084	0.503411	1	two.sided	72860
READ	Hormone ER	-0.00836733	0.943593	1	two.sided	68090
READ	PI3KAKT	0.0824738	0.484815	1	two.sided	61956
READ	RASMAPK	0.0937882	0.426721	1	two.sided	61192
READ	RTK	0.0951803	0.419859	1	two.sided	61098
READ	TSCmTOR	0.0724626	0.539518	1	two.sided	62632
SARC	Apoptosis	0.345926	1.00782e-07	1.00782e-06	two.sided	1.24169e+06
SARC	CellCycle	-0.188572	0.00453494	0.0272096	two.sided	2.25639e+06
SARC	DNADamage	-0.0306179	0.647802	0.899818	two.sided	1.95653e+06
SARC	EMT	0.149112	0.0253037	0.126519	two.sided	1.61533e+06
SARC	Hormone AR	-0.209946	0.0015401	0.0107807	two.sided	2.29696e+06
SARC	Hormone ER	0.23354	0.000411563	0.0032925	two.sided	1.45505e+06
SARC	PI3KAKT	-0.335785	2.47879e-07	2.23091e-06	two.sided	2.53585e+06
SARC	RASMAPK	0.0694075	0.299939	0.899818	two.sided	1.76664e+06
SARC	RTK	0.138077	0.0384953	0.153981	two.sided	1.63627e+06
SARC	TSCmTOR	-0.0591767	0.376976	0.899818	two.sided	2.01074e+06
SKCM	Apoptosis	0.345981	1.90076e-11	1.90076e-10	two.sided	4.91797e+06
SKCM	CellCycle	-0.0730437	0.169077	0.50723	two.sided	8.06887e+06
SKCM	DNADamage	-0.282311	6.00973e-08	5.40876e-07	two.sided	9.64248e+06
SKCM	EMT	-0.03194	0.548056	1	two.sided	7.75979e+06
SKCM	Hormone AR	-0.116967	0.0273314	0.163988	two.sided	8.39916e+06
SKCM	Hormone ER	0.229022	1.2763e-05	0.000102105	two.sided	5.79745e+06
SKCM	PI3KAKT	-0.0134909	0.799757	1	two.sided	7.62106e+06
SKCM	RASMAPK	0.10185	0.054865	0.274325	two.sided	6.75374e+06
SKCM	RTK	0.142216	0.0071976	0.0503832	two.sided	6.4502e+06
SKCM	TSCmTOR	0.0910614	0.0862231	0.344892	two.sided	6.83486e+06
STAD	Apoptosis	0.300122	2.36731e-08	2.36731e-07	two.sided	4424714
STAD	CellCycle	-0.152114	0.00524224	0.0366957	two.sided	7283804
STAD	DNADamage	-0.143925	0.00828496	0.0497097	two.sided	7232034
STAD	EMT	-0.0472164	0.388086	0.564224	two.sided	6620628
STAD	Hormone AR	-0.102989	0.0593497	0.237399	two.sided	6973226
STAD	Hormone ER	0.118713	0.0296339	0.148169	two.sided	5571600
STAD	PI3KAKT	-0.161651	0.00299235	0.0239388	two.sided	7344100
STAD	RASMAPK	0.0655328	0.23077	0.564224	two.sided	5907814
STAD	RTK	0.0719689	0.188075	0.564224	two.sided	5867124
STAD	TSCmTOR	-0.174725	0.00132112	0.0118901	two.sided	7426752
TGCT	Apoptosis	-0.0122267	0.892788	1	two.sided	321635
TGCT	CellCycle	-0.401618	3.78021e-06	3.7802e-05	two.sided	445364
TGCT	DNADamage	-0.249006	0.00529033	0.047613	two.sided	396872
TGCT	EMT	0.126034	0.163072	0.978434	two.sided	277703
TGCT	Hormone AR	-0.15699	0.0816358	0.571451	two.sided	367633
TGCT	Hormone ER	0.0156445	0.863079	1	two.sided	312779
TGCT	PI3KAKT	-0.185453	0.0391962	0.313569	two.sided	376678
TGCT	RASMAPK	0.037555	0.678797	1	two.sided	305817
TGCT	RTK	0.050578	0.576936	1	two.sided	301679
TGCT	TSCmTOR	0.0382915	0.672855	1	two.sided	305583
THCA	Apoptosis	0.285155	1.90205e-08	1.71185e-07	two.sided	6.28278e+06
THCA	CellCycle	-0.180502	0.000443706	0.00266224	two.sided	1.03754e+07
THCA	DNADamage	-0.176629	0.000590263	0.00295131	two.sided	1.03414e+07
THCA	EMT	0.215735	2.5149e-05	0.000176041	two.sided	6.89291e+06
THCA	Hormone AR	-0.376861	4.22611e-14	4.22611e-13	two.sided	1.21012e+07
THCA	Hormone ER	-0.0629589	0.223859	0.447717	two.sided	9.34235e+06
THCA	PI3KAKT	-0.123034	0.017142	0.0685679	two.sided	9.87034e+06
THCA	RASMAPK	-0.0864479	0.0946037	0.283811	two.sided	9.54879e+06
THCA	RTK	-0.228479	7.86052e-06	6.2884e-05	two.sided	1.07971e+07
THCA	TSCmTOR	0.0389701	0.451799	0.451799	two.sided	8.44649e+06
THYM	Apoptosis	0.107421	0.321368	0.97953	two.sided	97948
THYM	CellCycle	-0.453798	1.2694e-05	0.00012694	two.sided	159534
THYM	DNADamage	-0.0712802	0.511063	1	two.sided	117558
THYM	EMT	-0.139881	0.195906	0.97953	two.sided	125086
THYM	Hormone AR	-0.245006	0.0224113	0.17929	two.sided	136622
THYM	Hormone ER	0.162991	0.131295	0.787768	two.sided	91850
THYM	PI3KAKT	0.12592	0.244671	0.97953	two.sided	95918
THYM	RASMAPK	0.288693	0.00686764	0.0618088	two.sided	78056
THYM	RTK	0.187322	0.082359	0.576513	two.sided	89180
THYM	TSCmTOR	-0.066177	0.541831	1	two.sided	116998
UCEC	Apoptosis	0.0903213	0.289938	1	two.sided	407154
UCEC	CellCycle	-0.25549	0.00246837	0.0222153	two.sided	561932
UCEC	DNADamage	-0.262492	0.00185548	0.0185548	two.sided	565066
UCEC	EMT	0.00504044	0.952999	1	two.sided	445324
UCEC	Hormone AR	-0.0746101	0.382259	1	two.sided	480974
UCEC	Hormone ER	-0.0256044	0.76452	1	two.sided	459040
UCEC	PI3KAKT	-0.141593	0.0963574	0.674502	two.sided	510954
UCEC	RASMAPK	0.236592	0.00514113	0.041129	two.sided	341686
UCEC	RTK	0.00802985	0.925177	1	two.sided	443986
UCEC	TSCmTOR	0.0633674	0.458173	1	two.sided	419218
UCS	Apoptosis	0.337495	0.0194288	0.194288	two.sided	12206
UCS	CellCycle	-0.0345202	0.815399	1	two.sided	19060
UCS	DNADamage	-0.266934	0.0668907	0.602016	two.sided	23342
UCS	EMT	-0.1231	0.403337	1	two.sided	20692
UCS	Hormone AR	-0.0857577	0.5611	1	two.sided	20004
UCS	Hormone ER	0.0186713	0.899662	1	two.sided	18080
UCS	PI3KAKT	-0.0594876	0.687119	1	two.sided	19520
UCS	RASMAPK	0.168042	0.252731	1	two.sided	15328
UCS	RTK	-0.205493	0.160765	1	two.sided	22210
UCS	TSCmTOR	0.232848	0.111164	0.889314	two.sided	14134
UVM	Apoptosis	0.195804	0.542874	1	two.sided	230
UVM	CellCycle	-0.391608	0.209564	1	two.sided	398
UVM	DNADamage	0.48951	0.109632	0.87706	two.sided	146
UVM	EMT	0.041958	0.903739	1	two.sided	274
UVM	Hormone AR	0.853147	0.000771902	0.00771902	two.sided	42
UVM	Hormone ER	0.727273	0.0100009	0.0900083	two.sided	78
UVM	PI3KAKT	-0.216783	0.499115	1	two.sided	348
UVM	RASMAPK	-0.20979	0.513513	1	two.sided	346
UVM	RTK	-0.153846	0.63514	1	two.sided	330
UVM	TSCmTOR	0.0629371	0.851682	1	two.sided	268
