# Supplementary material for: Multi-omics analysis reveals the panoramic picture of necroptosis-related regulators in pan-cancer
Source: Aging (Albany NY). 2022 Jun 21;14(12):5034–58. doi: 10.18632/aging.204124 (PMC9271292; doi:10.18632/aging.204124)
Supplement: Supplementary Material 17 [file aging-14-204124-s017.xlsx]

## Sheet: SheetName
cancertype	symbol	pval	fdr	entrez
BLCA	FADD	0.354303	0.551411	8772
BLCA	FAS	0.0204775	0.0900278	355
BLCA	FASLG	0.0935336	0.238042	356
BLCA	MLKL	0.667869	0.804648	197259
BLCA	RIPK1	0.583284	0.742495	8737
BLCA	RIPK3	0.00284134	0.0276918	11035
BLCA	TLR3	0.139926	0.306753	7098
BLCA	TNF	0.063434	0.186776	7124
BRCA	FADD	8.41476e-13	2.9587e-12	8772
BRCA	FAS	2.12438e-14	8.79493e-14	355
BRCA	FASLG	2.95339e-07	5.88922e-07	356
BRCA	MLKL	1.14072e-16	6.02336e-16	197259
BRCA	RIPK1	4.38043e-08	9.46838e-08	8737
BRCA	RIPK3	6.35855e-31	1.49788e-29	11035
BRCA	TLR3	1.52023e-13	5.75275e-13	7098
BRCA	TNF	2.95947e-09	7.23435e-09	7124
COAD	FADD	0.46661	0.80728	8772
COAD	FAS	0.0245936	0.443459	355
COAD	FASLG	0.0848037	0.595586	356
COAD	MLKL	0.532079	0.829096	197259
COAD	RIPK1	0.458856	0.804624	8737
COAD	RIPK3	0.911672	0.968677	11035
COAD	TLR3	0.249284	0.715073	7098
COAD	TNF	0.663278	0.878227	7124
GBM	FADD	0.0299662	0.0507009	8772
GBM	FAS	2.0719e-05	0.000147754	355
GBM	FASLG	0.00111676	0.00350184	356
GBM	MLKL	5.5551e-05	0.000322063	197259
GBM	RIPK1	3.19191e-08	8.45072e-07	8737
GBM	RIPK3	2.475e-05	0.000169644	11035
GBM	TLR3	0.0101049	0.020895	7098
GBM	TNF	0.000496621	0.00182601	7124
HNSC	FADD	1.9639e-05	0.000347478	8772
HNSC	FAS	0.00577905	0.0227871	355
HNSC	FASLG	0.00799467	0.0292599	356
HNSC	MLKL	0.239519	0.380149	197259
HNSC	RIPK1	0.00419447	0.0179029	8737
HNSC	RIPK3	0.30478	0.453511	11035
HNSC	TLR3	0.0424538	0.104531	7098
HNSC	TNF	0.14502	0.261896	7124
KIRC	FADD	1.25779e-16	7.62681e-16	8772
KIRC	FAS	0.00012661	0.000194281	355
KIRC	FASLG	7.29087e-06	1.2544e-05	356
KIRC	MLKL	2.69957e-09	6.53417e-09	197259
KIRC	RIPK1	0.00462025	0.0061319	8737
KIRC	RIPK3	3.89194e-12	1.28738e-11	11035
KIRC	TLR3	3.64281e-17	2.398e-16	7098
KIRC	TNF	0.070789	0.0819024	7124
LUAD	FADD	0.00483003	0.00960888	8772
LUAD	FAS	5.81361e-15	1.63756e-12	355
LUAD	FASLG	0.000196164	0.000646922	356
LUAD	MLKL	8.7614e-06	4.7379e-05	197259
LUAD	RIPK1	0.183012	0.216878	8737
LUAD	RIPK3	2.0192e-05	9.5119e-05	11035
LUAD	TLR3	1.82501e-15	7.95795e-13	7098
LUAD	TNF	1.1208e-05	5.8132e-05	7124
LUSC	FADD	0.505932	0.550951	8772
LUSC	FAS	3.61658e-06	3.0527e-05	355
LUSC	FASLG	0.00516175	0.0127014	356
LUSC	MLKL	1.082e-05	7.5473e-05	197259
LUSC	RIPK1	0.00520784	0.0127904	8737
LUSC	RIPK3	6.375e-08	1.11802e-06	11035
LUSC	TLR3	2.9162e-05	0.000172897	7098
LUSC	TNF	0.000489918	0.00180003	7124
STAD	FADD	0.00443027	0.00713503	8772
STAD	FAS	5.75306e-12	1.06334e-10	355
STAD	FASLG	7.63647e-09	5.25265e-08	356
STAD	MLKL	0.00010559	0.000242458	197259
STAD	RIPK1	0.00153056	0.00272249	8737
STAD	RIPK3	1.59044e-11	2.54496e-10	11035
STAD	TLR3	1.88855e-09	1.56836e-08	7098
STAD	TNF	0.144611	0.167919	7124
