# Supplementary material for: Multi-omics analysis reveals the panoramic picture of necroptosis-related regulators in pan-cancer
Source: Aging (Albany NY). 2022 Jun 21;14(12):5034–58. doi: 10.18632/aging.204124 (PMC9271292; doi:10.18632/aging.204124)
Supplement: Supplementary Material 18 [file aging-14-204124-s018.xlsx]

## Sheet: SheetName
cancertype	symbol	stagetype	stage1	stage2	stage3	stage4	pval	fdr	entrez
ACC	FADD	pathologic_stage	740/9	580/37	580/16	560/15	0.0738532	0.365318	8772
ACC	FAS	pathologic_stage	1600/9	960/37	1400/16	520/15	0.108981	0.416468	355
ACC	FASLG	pathologic_stage	14/9	5.5/37	2.8/16	9.7/15	0.0524169	0.328933	356
ACC	MLKL	pathologic_stage	160/9	130/37	100/16	230/15	0.137187	0.452617	197259
ACC	RIPK1	pathologic_stage	680/9	590/37	570/16	700/15	0.256383	0.562404	8737
ACC	RIPK3	pathologic_stage	37/9	17/37	16/16	23/15	0.000871181	0.0615549	11035
ACC	TLR3	pathologic_stage	270/9	280/37	190/16	170/15	0.207289	0.522568	7098
ACC	TNF	pathologic_stage	8/9	5.7/37	1.5/16	4.8/15	0.0449148	0.311844	7124
BLCA	FADD	pathologic_stage		950/130	790/140	870/134	0.297639	0.510105	8772
BLCA	FAS	pathologic_stage		260/130	350/140	310/134	0.0189654	0.0970821	355
BLCA	FASLG	pathologic_stage		21/130	22/140	12/134	0.0479669	0.172517	356
BLCA	MLKL	pathologic_stage		350/130	350/140	340/134	0.7351	0.841144	197259
BLCA	RIPK1	pathologic_stage		1000/130	950/140	950/134	0.0162219	0.0878655	8737
BLCA	RIPK3	pathologic_stage		270/130	250/140	230/134	0.142361	0.333212	11035
BLCA	TLR3	pathologic_stage		150/130	120/140	140/134	0.64514	0.783339	7098
BLCA	TNF	pathologic_stage		26/130	45/140	53/134	0.923878	0.957456	7124
BRCA	FADD	pathologic_stage	900/182	910/626	930/252	1100/20	0.538859	0.701777	8772
BRCA	FAS	pathologic_stage	310/182	300/626	280/252	260/20	0.504775	0.677761	355
BRCA	FASLG	pathologic_stage	26/182	26/626	23/252	22/20	0.743131	0.840978	356
BRCA	MLKL	pathologic_stage	200/182	210/626	200/252	220/20	0.815691	0.884554	197259
BRCA	RIPK1	pathologic_stage	1100/182	1100/626	1100/252	1000/20	0.0162307	0.113296	8737
BRCA	RIPK3	pathologic_stage	240/182	190/626	200/252	160/20	7.5183e-05	0.00935582	11035
BRCA	TLR3	pathologic_stage	190/182	170/626	170/252	98/20	0.0183714	0.121045	7098
BRCA	TNF	pathologic_stage	56/182	58/626	42/252	49/20	0.00635521	0.0708872	7124
CHOL	FADD	pathologic_stage	640/19	660/9		730/7	0.784564	0.99976	8772
CHOL	FAS	pathologic_stage	360/19	280/9		230/7	0.512665	0.99976	355
CHOL	FASLG	pathologic_stage	15/19	16/9		6.2/7	0.396486	0.99976	356
CHOL	MLKL	pathologic_stage	390/19	410/9		370/7	0.964417	0.99976	197259
CHOL	RIPK1	pathologic_stage	960/19	1100/9		940/7	0.133442	0.99976	8737
CHOL	RIPK3	pathologic_stage	190/19	210/9		300/7	0.486774	0.99976	11035
CHOL	TLR3	pathologic_stage	160/19	250/9		210/7	0.392407	0.99976	7098
CHOL	TNF	pathologic_stage	45/19	23/9		15/7	0.301824	0.99976	7124
COAD	FADD	pathologic_stage	710/45	680/111	690/81	700/39	0.57641	0.769425	8772
COAD	FAS	pathologic_stage	350/45	370/111	290/81	240/39	0.00130778	0.0446432	355
COAD	FASLG	pathologic_stage	18/45	19/111	12/81	7.7/39	0.000698115	0.0325393	356
COAD	MLKL	pathologic_stage	530/45	570/111	520/81	560/39	0.169209	0.438928	197259
COAD	RIPK1	pathologic_stage	870/45	860/111	910/81	870/39	0.733282	0.859821	8737
COAD	RIPK3	pathologic_stage	450/45	450/111	460/81	430/39	0.936131	0.967628	11035
COAD	TLR3	pathologic_stage	160/45	140/111	140/81	120/39	0.278109	0.548749	7098
COAD	TNF	pathologic_stage	23/45	23/111	19/81	22/39	0.204506	0.478045	7124
ESCA	FADD	pathologic_stage	770/19	1600/78	1400/56	1700/9	0.0223171	0.209584	8772
ESCA	FAS	pathologic_stage	340/19	460/78	430/56	350/9	0.40891	0.663046	355
ESCA	FASLG	pathologic_stage	8.5/19	19/78	19/56	7.4/9	0.22274	0.516833	356
ESCA	MLKL	pathologic_stage	430/19	410/78	440/56	540/9	0.0550578	0.296056	197259
ESCA	RIPK1	pathologic_stage	1100/19	970/78	1000/56	1000/9	0.709643	0.843311	8737
ESCA	RIPK3	pathologic_stage	290/19	190/78	250/56	230/9	0.0430429	0.268682	11035
ESCA	TLR3	pathologic_stage	230/19	230/78	190/56	210/9	0.729459	0.853827	7098
ESCA	TNF	pathologic_stage	33/19	80/78	85/56	36/9	0.772441	0.880569	7124
HNSC	FADD	pathologic_stage	1800/27	1400/74	1700/81	2100/268	0.0720256	0.311328	8772
HNSC	FAS	pathologic_stage	500/27	440/74	430/81	420/268	0.000229946	0.0170609	355
HNSC	FASLG	pathologic_stage	43/27	36/74	31/81	24/268	0.000724356	0.0331261	356
HNSC	MLKL	pathologic_stage	370/27	410/74	340/81	360/268	0.0469282	0.25664	197259
HNSC	RIPK1	pathologic_stage	1100/27	1100/74	1000/81	1000/268	0.000411772	0.0241789	8737
HNSC	RIPK3	pathologic_stage	230/27	210/74	190/81	180/268	0.00190283	0.0556142	11035
HNSC	TLR3	pathologic_stage	230/27	200/74	140/81	160/268	5.5326e-05	0.00757269	7098
HNSC	TNF	pathologic_stage	130/27	100/74	120/81	87/268	0.000157753	0.0138737	7124
KICH	FADD	pathologic_stage	440/21	400/25	430/14	580/6	0.477273	0.734643	8772
KICH	FAS	pathologic_stage	220/21	120/25	130/14	170/6	0.148997	0.500464	355
KICH	FASLG	pathologic_stage	7.2/21	7.1/25	6.5/14	5.5/6	0.827328	0.912772	356
KICH	MLKL	pathologic_stage	110/21	81/25	98/14	120/6	0.0876812	0.425597	197259
KICH	RIPK1	pathologic_stage	730/21	640/25	690/14	620/6	0.231698	0.573462	8737
KICH	RIPK3	pathologic_stage	77/21	48/25	56/14	41/6	0.11134	0.461248	11035
KICH	TLR3	pathologic_stage	190/21	120/25	99/14	120/6	0.128066	0.479855	7098
KICH	TNF	pathologic_stage	10/21	6.4/25	8.8/14	4.3/6	0.350116	0.657701	7124
KIRC	FADD	pathologic_stage	580/268	560/57	620/123	680/84	2.2322e-05	0.000230202	8772
KIRC	FAS	pathologic_stage	770/268	790/57	770/123	760/84	0.972121	0.979189	355
KIRC	FASLG	pathologic_stage	48/268	63/57	77/123	94/84	2.3335e-05	0.000237807	356
KIRC	MLKL	pathologic_stage	480/268	470/57	490/123	520/84	0.558087	0.657798	197259
KIRC	RIPK1	pathologic_stage	1200/268	1100/57	1200/123	1200/84	0.0448809	0.100173	8737
KIRC	RIPK3	pathologic_stage	90/268	98/57	100/123	100/84	0.107994	0.197204	11035
KIRC	TLR3	pathologic_stage	1700/268	1700/57	1600/123	1400/84	0.105514	0.193639	7098
KIRC	TNF	pathologic_stage	22/268	14/57	22/123	18/84	0.141714	0.241337	7124
KIRP	FADD	pathologic_stage	800/172	790/22	820/52	740/15	0.643545	0.779374	8772
KIRP	FAS	pathologic_stage	710/172	730/22	740/52	760/15	0.982859	0.989791	355
KIRP	FASLG	pathologic_stage	13/172	21/22	15/52	9.7/15	0.624296	0.766275	356
KIRP	MLKL	pathologic_stage	360/172	290/22	340/52	350/15	0.377227	0.57778	197259
KIRP	RIPK1	pathologic_stage	930/172	920/22	810/52	800/15	0.0102375	0.0593484	8737
KIRP	RIPK3	pathologic_stage	68/172	78/22	53/52	38/15	0.312831	0.514328	11035
KIRP	TLR3	pathologic_stage	310/172	390/22	280/52	260/15	0.491219	0.670531	7098
KIRP	TNF	pathologic_stage	38/172	30/22	21/52	9.4/15	0.00013816	0.00343868	7124
LIHC	FADD	pathologic_stage	650/173	670/87	680/85	640/5	0.841399	0.922781	8772
LIHC	FAS	pathologic_stage	360/173	370/87	360/85	250/5	0.397933	0.682877	355
LIHC	FASLG	pathologic_stage	18/173	16/87	16/85	5.4/5	0.0274388	0.226438	356
LIHC	MLKL	pathologic_stage	170/173	200/87	180/85	180/5	0.602643	0.804051	197259
LIHC	RIPK1	pathologic_stage	1100/173	1100/87	1100/85	1100/5	0.900454	0.950958	8737
LIHC	RIPK3	pathologic_stage	51/173	41/87	40/85	31/5	0.327801	0.63567	11035
LIHC	TLR3	pathologic_stage	120/173	130/87	150/85	90/5	0.869994	0.936632	7098
LIHC	TNF	pathologic_stage	12/173	10/87	7/85	2/5	0.0227033	0.212059	7124
LUAD	FADD	pathologic_stage	670/277	740/122	720/84	710/26	0.0825137	0.333662	8772
LUAD	FAS	pathologic_stage	520/277	540/122	570/84	500/26	0.318214	0.619813	355
LUAD	FASLG	pathologic_stage	38/277	38/122	28/84	32/26	0.10594	0.378263	356
LUAD	MLKL	pathologic_stage	360/277	400/122	440/84	430/26	0.0232447	0.182727	197259
LUAD	RIPK1	pathologic_stage	1000/277	1000/122	1100/84	1000/26	0.84811	0.935219	8737
LUAD	RIPK3	pathologic_stage	320/277	290/122	290/84	250/26	0.0621204	0.293658	11035
LUAD	TLR3	pathologic_stage	250/277	260/122	250/84	320/26	0.931885	0.97116	7098
LUAD	TNF	pathologic_stage	51/277	36/122	36/84	47/26	0.0350107	0.225154	7124
LUSC	FADD	pathologic_stage	930/245	1200/162	1000/84	600/7	0.0857211	0.407584	8772
LUSC	FAS	pathologic_stage	460/245	480/162	450/84	490/7	0.64232	0.831117	355
LUSC	FASLG	pathologic_stage	26/245	26/162	28/84	18/7	0.44439	0.722101	356
LUSC	MLKL	pathologic_stage	250/245	270/162	270/84	170/7	5.44263e-08	4.9219e-05	197259
LUSC	RIPK1	pathologic_stage	930/245	840/162	870/84	680/7	0.00229516	0.0857258	8737
LUSC	RIPK3	pathologic_stage	160/245	150/162	150/84	160/7	0.467927	0.737399	11035
LUSC	TLR3	pathologic_stage	110/245	110/162	110/84	110/7	0.805411	0.908698	7098
LUSC	TNF	pathologic_stage	67/245	57/162	29/84	29/7	0.0280543	0.269167	7124
MESO	FADD	pathologic_stage	1100/10	1200/16	1000/45	1000/16	0.14808	0.625572	8772
MESO	FAS	pathologic_stage	990/10	830/16	950/45	850/16	0.888786	0.964365	355
MESO	FASLG	pathologic_stage	31/10	34/16	38/45	53/16	0.850917	0.95392	356
MESO	MLKL	pathologic_stage	300/10	270/16	250/45	270/16	0.846309	0.952883	197259
MESO	RIPK1	pathologic_stage	1100/10	1100/16	1100/45	1100/16	0.442412	0.800652	8737
MESO	RIPK3	pathologic_stage	150/10	200/16	190/45	200/16	0.595606	0.865782	11035
MESO	TLR3	pathologic_stage	210/10	190/16	130/45	200/16	0.257042	0.706068	7098
MESO	TNF	pathologic_stage	39/10	30/16	34/45	34/16	0.842613	0.951894	7124
PAAD	FADD	pathologic_stage	660/21	740/147		640/5	0.173129	0.405895	8772
PAAD	FAS	pathologic_stage	370/21	450/147		430/5	0.222606	0.450963	355
PAAD	FASLG	pathologic_stage	14/21	13/147		5.2/5	0.157193	0.391247	356
PAAD	MLKL	pathologic_stage	380/21	510/147		430/5	0.0565364	0.292377	197259
PAAD	RIPK1	pathologic_stage	970/21	970/147		1200/5	0.00269484	0.187685	8737
PAAD	RIPK3	pathologic_stage	320/21	520/147		460/5	0.0326245	0.276315	11035
PAAD	TLR3	pathologic_stage	180/21	270/147		270/5	0.0820516	0.317081	7098
PAAD	TNF	pathologic_stage	23/21	31/147		22/5	0.28664	0.51125	7124
READ	FADD	pathologic_stage	660/12	710/26	650/33	670/13	0.802513	0.936901	8772
READ	FAS	pathologic_stage	350/12	260/26	230/33	260/13	0.327258	0.783559	355
READ	FASLG	pathologic_stage	11/12	15/26	11/33	14/13	0.635769	0.883937	356
READ	MLKL	pathologic_stage	550/12	500/26	520/33	490/13	0.956872	0.985544	197259
READ	RIPK1	pathologic_stage	830/12	820/26	880/33	840/13	0.870661	0.958087	8737
READ	RIPK3	pathologic_stage	430/12	440/26	460/33	450/13	0.915999	0.972162	11035
READ	TLR3	pathologic_stage	130/12	160/26	110/33	110/13	0.107808	0.635617	7098
READ	TNF	pathologic_stage	23/12	18/26	22/33	32/13	0.158433	0.685894	7124
SKCM	FADD	pathologic_stage	730/78	890/140	800/171	980/24	0.216689	0.453579	8772
SKCM	FAS	pathologic_stage	280/78	200/140	230/171	340/24	0.0486832	0.208316	355
SKCM	FASLG	pathologic_stage	57/78	32/140	59/171	37/24	0.00422379	0.0498648	356
SKCM	MLKL	pathologic_stage	250/78	140/140	210/171	210/24	4.03634e-06	0.000878893	197259
SKCM	RIPK1	pathologic_stage	1200/78	1300/140	1200/171	1400/24	0.035362	0.176347	8737
SKCM	RIPK3	pathologic_stage	90/78	82/140	98/171	82/24	0.411452	0.627522	11035
SKCM	TLR3	pathologic_stage	150/78	110/140	120/171	120/24	0.0352907	0.176082	7098
SKCM	TNF	pathologic_stage	23/78	23/140	28/171	19/24	0.829769	0.904324	7124
STAD	FADD	pathologic_stage	670/57	760/123	680/171	640/41	0.0961456	0.343468	8772
STAD	FAS	pathologic_stage	430/57	480/123	520/171	480/41	0.461891	0.694052	355
STAD	FASLG	pathologic_stage	23/57	31/123	35/171	27/41	0.310046	0.579983	356
STAD	MLKL	pathologic_stage	490/57	510/123	540/171	560/41	0.218343	0.499244	197259
STAD	RIPK1	pathologic_stage	1100/57	1000/123	1000/171	1000/41	0.19249	0.469792	8737
STAD	RIPK3	pathologic_stage	370/57	360/123	340/171	390/41	0.255816	0.533821	11035
STAD	TLR3	pathologic_stage	300/57	290/123	280/171	240/41	0.73911	0.862262	7098
STAD	TNF	pathologic_stage	35/57	49/123	29/171	29/41	0.0579827	0.271292	7124
TGCT	FADD	pathologic_stage	460/56	630/12	580/14		0.00199914	0.031602	8772
TGCT	FAS	pathologic_stage	150/56	150/12	120/14		0.443343	0.595514	355
TGCT	FASLG	pathologic_stage	82/56	56/12	31/14		0.0360586	0.129195	356
TGCT	MLKL	pathologic_stage	300/56	490/12	310/14		0.0460932	0.148619	197259
TGCT	RIPK1	pathologic_stage	560/56	590/12	590/14		0.899989	0.935633	8737
TGCT	RIPK3	pathologic_stage	140/56	140/12	75/14		0.0692902	0.188293	11035
TGCT	TLR3	pathologic_stage	23/56	35/12	36/14		0.118574	0.259955	7098
TGCT	TNF	pathologic_stage	76/56	64/12	52/14		0.283692	0.448305	7124
THCA	FADD	pathologic_stage	640/288	620/51	680/111	660/57	0.134762	0.248868	8772
THCA	FAS	pathologic_stage	700/288	470/51	700/111	730/57	6.7438e-05	0.000877054	355
THCA	FASLG	pathologic_stage	18/288	8.8/51	12/111	9.3/57	0.00570348	0.0237959	356
THCA	MLKL	pathologic_stage	160/288	140/51	150/111	150/57	0.120763	0.230236	197259
THCA	RIPK1	pathologic_stage	880/288	890/51	850/111	820/57	0.0396246	0.101982	8737
THCA	RIPK3	pathologic_stage	330/288	290/51	330/111	330/57	0.219138	0.353038	11035
THCA	TLR3	pathologic_stage	130/288	120/51	130/111	96/57	0.00927853	0.03425	7098
THCA	TNF	pathologic_stage	14/288	7.5/51	13/111	18/57	0.0339786	0.0905518	7124
UVM	FADD	pathologic_stage		940/39	1000/36		0.0475318	0.982061	8772
UVM	FAS	pathologic_stage		170/39	180/36		0.389604	0.984853	355
UVM	FASLG	pathologic_stage		11/39	13/36		0.692763	0.995319	356
UVM	MLKL	pathologic_stage		64/39	67/36		0.837136	0.99929	197259
UVM	RIPK1	pathologic_stage		1200/39	1000/36		0.191469	0.982061	8737
UVM	RIPK3	pathologic_stage		66/39	56/36		0.920235	0.99929	11035
UVM	TLR3	pathologic_stage		73/39	83/36		0.911871	0.99929	7098
UVM	TNF	pathologic_stage		3.7/39	3.6/36		0.952805	0.99929	7124
