# Supplementary material for: Multi-omics analysis reveals the panoramic picture of necroptosis-related regulators in pan-cancer
Source: Aging (Albany NY). 2022 Jun 21;14(12):5034–58. doi: 10.18632/aging.204124 (PMC9271292; doi:10.18632/aging.204124)
Supplement: Supplementary Material 19 [file aging-14-204124-s019.xlsx]

## Sheet: SheetName
cancertype	symbol	sur_type	hr_categorical(H/L)	coxp_categorical	logrankp	higher_risk_of_death
ACC	FADD	OS	0.5865	0.168665	0.163535	Lower expr.
ACC	FAS	OS	0.39156	0.0251503	0.0202012	Lower expr.
ACC	FASLG	OS	0.627316	0.228555	0.224166	Lower expr.
ACC	MLKL	OS	1.12372	0.757929	0.759831	Higher expr.
ACC	RIPK1	OS	1.99237	0.0838186	0.0782112	Higher expr.
ACC	RIPK3	OS	0.844124	0.655247	0.656696	Lower expr.
ACC	TLR3	OS	0.601306	0.191065	0.18628	Lower expr.
ACC	TNF	OS	1.02936	0.93954	0.939569	Higher expr.
BLCA	FADD	OS	0.89179	0.446815	0.445989	Lower expr.
BLCA	FAS	OS	1.1246	0.435867	0.435903	Higher expr.
BLCA	FASLG	OS	0.752403	0.0585059	0.0577129	Lower expr.
BLCA	MLKL	OS	0.637607	0.00301615	0.0027908	Lower expr.
BLCA	RIPK1	OS	0.793137	0.125941	0.12495	Lower expr.
BLCA	RIPK3	OS	0.831549	0.220722	0.220371	Lower expr.
BLCA	TLR3	OS	0.965693	0.816115	0.816216	Lower expr.
BLCA	TNF	OS	0.909106	0.525217	0.525779	Lower expr.
BRCA	FADD	OS	0.915955	0.588309	0.587961	Lower expr.
BRCA	FAS	OS	0.939347	0.699576	0.698161	Lower expr.
BRCA	FASLG	OS	0.64614	0.00864459	0.0081319	Lower expr.
BRCA	MLKL	OS	0.935432	0.680181	0.680547	Lower expr.
BRCA	RIPK1	OS	1.11649	0.497446	0.496151	Higher expr.
BRCA	RIPK3	OS	0.723236	0.045893	0.0452141	Lower expr.
BRCA	TLR3	OS	0.821778	0.224551	0.222937	Lower expr.
BRCA	TNF	OS	0.867821	0.382935	0.383637	Lower expr.
CESC	FADD	OS	1.56737	0.0591553	0.0571439	Higher expr.
CESC	FAS	OS	0.847967	0.482621	0.483347	Lower expr.
CESC	FASLG	OS	0.801292	0.345525	0.343992	Lower expr.
CESC	MLKL	OS	1.1563	0.535989	0.535872	Higher expr.
CESC	RIPK1	OS	0.993177	0.97678	0.976134	Lower expr.
CESC	RIPK3	OS	1.05337	0.825664	0.82638	Higher expr.
CESC	TLR3	OS	0.980015	0.931513	0.93242	Lower expr.
CESC	TNF	OS	1.59385	0.0490035	0.0472187	Higher expr.
CHOL	FADD	OS	1.60339	0.324647	0.320429	Higher expr.
CHOL	FAS	OS	0.447048	0.110177	0.101232	Lower expr.
CHOL	FASLG	OS	0.870742	0.76997	0.769795	Lower expr.
CHOL	MLKL	OS	1.40108	0.495113	0.493106	Higher expr.
CHOL	RIPK1	OS	2.02401	0.154648	0.146476	Higher expr.
CHOL	RIPK3	OS	1.70785	0.302147	0.296976	Higher expr.
CHOL	TLR3	OS	1.30994	0.579293	0.578155	Higher expr.
CHOL	TNF	OS	0.534232	0.217764	0.21039	Lower expr.
COAD	FADD	OS	1.13272	0.60603	0.605798	Higher expr.
COAD	FAS	OS	0.621801	0.0533286	0.0511574	Lower expr.
COAD	FASLG	OS	0.876922	0.58772	0.587453	Lower expr.
COAD	MLKL	OS	1.11601	0.649982	0.649821	Higher expr.
COAD	RIPK1	OS	0.82468	0.430717	0.430016	Lower expr.
COAD	RIPK3	OS	0.494011	0.0049379	0.00411645	Lower expr.
COAD	TLR3	OS	0.795464	0.353735	0.352719	Lower expr.
COAD	TNF	OS	0.79367	0.341089	0.340032	Lower expr.
DLBC	FADD	OS	1.35874	0.675229	0.674043	Higher expr.
DLBC	FAS	OS	1.80984	0.417772	0.411051	Higher expr.
DLBC	FASLG	OS	0.579347	0.456738	0.451292	Lower expr.
DLBC	MLKL	OS	3.32398	0.151369	0.127977	Higher expr.
DLBC	RIPK1	OS	0.498283	0.343861	0.334581	Lower expr.
DLBC	RIPK3	OS	0.508367	0.355047	0.345989	Lower expr.
DLBC	TLR3	OS	1.10301	0.890071	0.890028	Higher expr.
DLBC	TNF	OS	1.17621	0.822725	0.822553	Higher expr.
ESCA	FADD	OS	0.841692	0.453871	0.453415	Lower expr.
ESCA	FAS	OS	0.92223	0.723238	0.723617	Lower expr.
ESCA	FASLG	OS	1.19361	0.436853	0.436702	Higher expr.
ESCA	MLKL	OS	1.16156	0.518317	0.516965	Higher expr.
ESCA	RIPK1	OS	0.881707	0.580225	0.580272	Lower expr.
ESCA	RIPK3	OS	1.162	0.517968	0.516648	Higher expr.
ESCA	TLR3	OS	0.690038	0.109774	0.10803	Lower expr.
ESCA	TNF	OS	1.03405	0.882698	0.883346	Higher expr.
GBM	FADD	OS	1.17909	0.343479	0.33901	Higher expr.
GBM	FAS	OS	1.36976	0.0702895	0.0706367	Higher expr.
GBM	FASLG	OS	1.07485	0.678084	0.666927	Higher expr.
GBM	MLKL	OS	1.14995	0.420741	0.411691	Higher expr.
GBM	RIPK1	OS	1.21986	0.256796	0.260829	Higher expr.
GBM	RIPK3	OS	1.05554	0.757873	0.744254	Higher expr.
GBM	TLR3	OS	1.00778	0.964342	0.957112	Higher expr.
GBM	TNF	OS	0.953864	0.787304	0.805308	Lower expr.
HNSC	FADD	OS	1.47685	0.00437082	0.00412754	Higher expr.
HNSC	FAS	OS	0.829222	0.167749	0.167153	Lower expr.
HNSC	FASLG	OS	0.709035	0.0115676	0.0111717	Lower expr.
HNSC	MLKL	OS	1.04618	0.738084	0.738254	Higher expr.
HNSC	RIPK1	OS	0.789235	0.0814236	0.0807364	Lower expr.
HNSC	RIPK3	OS	0.942087	0.659982	0.659714	Lower expr.
HNSC	TLR3	OS	1.00548	0.967731	0.967184	Higher expr.
HNSC	TNF	OS	0.824337	0.154181	0.153567	Lower expr.
KICH	FADD	OS	1.16944	0.815618	0.815434	Higher expr.
KICH	FAS	OS	0.519135	0.354147	0.345582	Lower expr.
KICH	FASLG	OS	0.290053	0.123278	0.100948	Lower expr.
KICH	MLKL	OS	0.346263	0.186203	0.166221	Lower expr.
KICH	RIPK1	OS	0.305514	0.139222	0.117169	Lower expr.
KICH	RIPK3	OS	0.81293	0.757605	0.757186	Lower expr.
KICH	TLR3	OS	0.828892	0.779728	0.779413	Lower expr.
KICH	TNF	OS	1.54678	0.51595	0.51264	Higher expr.
KIRC	FADD	OS	1.30204	0.0846759	0.0837499	Higher expr.
KIRC	FAS	OS	0.975436	0.869588	0.869498	Lower expr.
KIRC	FASLG	OS	1.36952	0.0401661	0.0393969	Higher expr.
KIRC	MLKL	OS	1.25956	0.130313	0.129192	Higher expr.
KIRC	RIPK1	OS	0.993611	0.966263	0.965748	Lower expr.
KIRC	RIPK3	OS	1.31907	0.0697373	0.0689661	Higher expr.
KIRC	TLR3	OS	0.457575	6.79294e-07	3.53314e-07	Lower expr.
KIRC	TNF	OS	1.08165	0.604359	0.603771	Higher expr.
KIRP	FADD	OS	0.848711	0.588519	0.588113	Lower expr.
KIRP	FAS	OS	1.55594	0.14993	0.146659	Higher expr.
KIRP	FASLG	OS	1.21651	0.516529	0.515862	Higher expr.
KIRP	MLKL	OS	0.899186	0.72878	0.728663	Lower expr.
KIRP	RIPK1	OS	0.81738	0.505543	0.504823	Lower expr.
KIRP	RIPK3	OS	0.679716	0.208211	0.205404	Lower expr.
KIRP	TLR3	OS	0.654456	0.167233	0.16409	Lower expr.
KIRP	TNF	OS	0.764724	0.375818	0.374391	Lower expr.
LAML	FADD	OS	1.57679	0.0207835	0.0205103	Higher expr.
LAML	FAS	OS	0.99186	0.966715	0.958674	Lower expr.
LAML	FASLG	OS	1.04875	0.807751	0.798163	Higher expr.
LAML	MLKL	OS	1.11393	0.582662	0.576249	Higher expr.
LAML	RIPK1	OS	1.06935	0.731864	0.742848	Higher expr.
LAML	RIPK3	OS	1.65178	0.0111537	0.0106705	Higher expr.
LAML	TLR3	OS	1.03982	0.841575	0.834096	Higher expr.
LAML	TNF	OS	0.710661	0.0826833	0.0803519	Lower expr.
LGG	FADD	OS	2.14646	1.8212e-05	1.16e-05	Higher expr.
LGG	FAS	OS	1.47167	0.0253824	0.0238696	Higher expr.
LGG	FASLG	OS	1.29396	0.134318	0.134568	Higher expr.
LGG	MLKL	OS	1.73944	0.00159368	0.00136073	Higher expr.
LGG	RIPK1	OS	2.12666	2.9697e-05	1.9412e-05	Higher expr.
LGG	RIPK3	OS	2.24785	8.24875e-06	4.7113e-06	Higher expr.
LGG	TLR3	OS	1.99898	0.000109247	8.6181e-05	Higher expr.
LGG	TNF	OS	0.828822	0.275775	0.277964	Lower expr.
LIHC	FADD	OS	1.22978	0.240439	0.239242	Higher expr.
LIHC	FAS	OS	0.776497	0.152064	0.150958	Lower expr.
LIHC	FASLG	OS	0.757837	0.115673	0.114591	Lower expr.
LIHC	MLKL	OS	1.38585	0.0647348	0.0634743	Higher expr.
LIHC	RIPK1	OS	0.904839	0.570608	0.57099	Lower expr.
LIHC	RIPK3	OS	0.818728	0.255639	0.255178	Lower expr.
LIHC	TLR3	OS	0.798706	0.20254	0.201351	Lower expr.
LIHC	TNF	OS	0.920458	0.638926	0.637916	Lower expr.
LUAD	FADD	OS	1.81816	8.5362e-05	6.7189e-05	Higher expr.
LUAD	FAS	OS	0.776852	0.0906181	0.0898788	Lower expr.
LUAD	FASLG	OS	0.909896	0.524319	0.52401	Lower expr.
LUAD	MLKL	OS	1.29827	0.0790519	0.078182	Higher expr.
LUAD	RIPK1	OS	0.802775	0.140906	0.140215	Lower expr.
LUAD	RIPK3	OS	0.809518	0.15464	0.153947	Lower expr.
LUAD	TLR3	OS	1.09539	0.538447	0.537874	Higher expr.
LUAD	TNF	OS	0.797189	0.128492	0.127732	Lower expr.
LUSC	FADD	OS	1.10576	0.46565	0.465593	Higher expr.
LUSC	FAS	OS	1.1672	0.263183	0.262598	Higher expr.
LUSC	FASLG	OS	0.939579	0.65129	0.651426	Lower expr.
LUSC	MLKL	OS	1.07295	0.609668	0.609849	Higher expr.
LUSC	RIPK1	OS	1.122	0.404169	0.403891	Higher expr.
LUSC	RIPK3	OS	1.25239	0.108266	0.107525	Higher expr.
LUSC	TLR3	OS	1.11214	0.00517462	0.00492685	Higher expr.
LUSC	TNF	OS	1.18807	0.212343	0.211733	Higher expr.
MESO	FADD	OS	0.587486	0.030483	0.0285604	Lower expr.
MESO	FAS	OS	0.733576	0.195999	0.194673	Lower expr.
MESO	FASLG	OS	0.76285	0.255143	0.253366	Lower expr.
MESO	MLKL	OS	0.90531	0.674859	0.675518	Lower expr.
MESO	RIPK1	OS	0.59135	0.0286497	0.0265834	Lower expr.
MESO	RIPK3	OS	0.529257	0.0108879	0.00972913	Lower expr.
MESO	TLR3	OS	0.618871	0.0461538	0.0443285	Lower expr.
MESO	TNF	OS	1.06057	0.804511	0.806333	Higher expr.
OV	FADD	OS	0.881421	0.392135	0.394868	Lower expr.
OV	FAS	OS	1.25121	0.132202	0.130869	Higher expr.
OV	FASLG	OS	1.02757	0.854175	0.85481	Higher expr.
OV	MLKL	OS	0.814527	0.164891	0.165368	Lower expr.
OV	RIPK1	OS	0.926143	0.602503	0.606343	Lower expr.
OV	RIPK3	OS	1.08483	0.581634	0.584314	Higher expr.
OV	TLR3	OS	1.27306	0.10351	0.103267	Higher expr.
OV	TNF	OS	0.998548	0.992179	0.995231	Lower expr.
PAAD	FADD	OS	1.75291	0.00819282	0.00741165	Higher expr.
PAAD	FAS	OS	1.63947	0.0185463	0.0173636	Higher expr.
PAAD	FASLG	OS	0.975491	0.905518	0.906894	Lower expr.
PAAD	MLKL	OS	1.2033	0.373861	0.373967	Higher expr.
PAAD	RIPK1	OS	0.871079	0.509667	0.509683	Lower expr.
PAAD	RIPK3	OS	1.48305	0.0603713	0.0588333	Higher expr.
PAAD	TLR3	OS	1.49779	0.0564618	0.0549742	Higher expr.
PAAD	TNF	OS	0.655605	0.0462279	0.0446582	Lower expr.
PCPG	FADD	OS	6.20866	0.0893074	0.0529154	Higher expr.
PCPG	FAS	OS	1.79774	0.422832	0.41647	Higher expr.
PCPG	FASLG	OS	0.622749	0.524397	0.52435	Lower expr.
PCPG	MLKL	OS	0.824706	0.789535	0.787081	Lower expr.
PCPG	RIPK1	OS	0.973244	0.970181	0.975121	Lower expr.
PCPG	RIPK3	OS	0.892011	0.874627	0.872497	Lower expr.
PCPG	TLR3	OS	0.616128	0.515462	0.512214	Lower expr.
PCPG	TNF	OS	0.67614	0.592517	0.593684	Lower expr.
PRAD	FADD	OS	3.39203	0.12359	0.101994	Higher expr.
PRAD	FAS	OS	1.41913	0.590665	0.588996	Higher expr.
PRAD	FASLG	OS	2.08636	0.263694	0.254122	Higher expr.
PRAD	MLKL	OS	0.498502	0.315387	0.30593	Lower expr.
PRAD	RIPK1	OS	0.443201	0.239461	0.226829	Lower expr.
PRAD	RIPK3	OS	0.570467	0.420602	0.414826	Lower expr.
PRAD	TLR3	OS	0.593257	0.459881	0.455341	Lower expr.
PRAD	TNF	OS	0.924933	0.902375	0.902351	Lower expr.
READ	FADD	OS	0.438783	0.118761	0.110639	Lower expr.
READ	FAS	OS	1.0217	0.964911	0.971247	Higher expr.
READ	FASLG	OS	1.01974	0.967503	0.971606	Higher expr.
READ	MLKL	OS	0.633787	0.346899	0.348549	Lower expr.
READ	RIPK1	OS	1.03064	0.950264	0.95433	Higher expr.
READ	RIPK3	OS	0.891907	0.809785	0.825368	Lower expr.
READ	TLR3	OS	0.562759	0.254995	0.239271	Lower expr.
READ	TNF	OS	1.20387	0.705212	0.69535	Higher expr.
SARC	FADD	OS	1.13421	0.531399	0.530248	Higher expr.
SARC	FAS	OS	0.88171	0.531994	0.531674	Lower expr.
SARC	FASLG	OS	0.740125	0.141128	0.139731	Lower expr.
SARC	MLKL	OS	0.709008	0.0910502	0.0895225	Lower expr.
SARC	RIPK1	OS	0.743307	0.143473	0.142019	Lower expr.
SARC	RIPK3	OS	0.493092	0.000728647	0.000564636	Lower expr.
SARC	TLR3	OS	0.707904	0.0876922	0.0859511	Lower expr.
SARC	TNF	OS	0.5356	0.00267937	0.00228477	Lower expr.
SKCM	FADD	OS	1.20678	0.166494	0.166068	Higher expr.
SKCM	FAS	OS	0.697046	0.00764228	0.00732838	Lower expr.
SKCM	FASLG	OS	0.550443	1.3549e-05	1.012e-05	Lower expr.
SKCM	MLKL	OS	0.532143	3.89405e-06	2.72612e-06	Lower expr.
SKCM	RIPK1	OS	1.26221	0.0834973	0.0826451	Higher expr.
SKCM	RIPK3	OS	0.710111	0.0117088	0.0113032	Lower expr.
SKCM	TLR3	OS	0.681855	0.00473988	0.00449699	Lower expr.
SKCM	TNF	OS	0.652205	0.00188379	0.00174227	Lower expr.
STAD	FADD	OS	0.900675	0.511406	0.510184	Lower expr.
STAD	FAS	OS	0.914693	0.576124	0.576939	Lower expr.
STAD	FASLG	OS	0.817636	0.20831	0.207622	Lower expr.
STAD	MLKL	OS	0.896262	0.492255	0.492452	Lower expr.
STAD	RIPK1	OS	0.971184	0.854452	0.855318	Lower expr.
STAD	RIPK3	OS	0.937901	0.687935	0.687996	Lower expr.
STAD	TLR3	OS	0.83935	0.273396	0.272848	Lower expr.
STAD	TNF	OS	0.866244	0.368745	0.368565	Lower expr.
TGCT	FADD	OS	2.26285	0.485384	0.474105	Higher expr.
TGCT	FAS	OS	9.42881e+08	0.998679	0.0194186	Higher expr.
TGCT	FASLG	OS	0.485349	0.555056	0.546421	Lower expr.
TGCT	MLKL	OS	5.76904e+08	0.99868	0.048866	Higher expr.
TGCT	RIPK1	OS	3.9915	0.244456	0.214301	Higher expr.
TGCT	RIPK3	OS	4.24488	0.221836	0.188798	Higher expr.
TGCT	TLR3	OS	5.86439e+08	0.998679	0.046986	Higher expr.
TGCT	TNF	OS	4.14209	0.230645	0.198723	Higher expr.
THCA	FADD	OS	0.272762	0.0248768	0.0163513	Lower expr.
THCA	FAS	OS	0.413755	0.102348	0.0916877	Lower expr.
THCA	FASLG	OS	0.466227	0.157505	0.147657	Lower expr.
THCA	MLKL	OS	0.524953	0.23286	0.224906	Lower expr.
THCA	RIPK1	OS	1.09243	0.85999	0.859945	Higher expr.
THCA	RIPK3	OS	1.62204	0.338316	0.333682	Higher expr.
THCA	TLR3	OS	0.870727	0.783809	0.783641	Lower expr.
THCA	TNF	OS	0.914607	0.859598	0.859552	Lower expr.
THYM	FADD	OS	0.611432	0.466263	0.461939	Lower expr.
THYM	FAS	OS	12.4921	0.018485	0.00307516	Higher expr.
THYM	FASLG	OS	9.34729e+08	0.998025	0.000424532	Higher expr.
THYM	MLKL	OS	1.09584	0.892946	0.892912	Higher expr.
THYM	RIPK1	OS	0.241939	0.0775958	0.0556846	Lower expr.
THYM	RIPK3	OS	0.258146	0.0920519	0.0696767	Lower expr.
THYM	TLR3	OS	4.09537	0.0793323	0.0572801	Higher expr.
THYM	TNF	OS	3.05689	0.133114	0.117693	Higher expr.
UCEC	FADD	OS	0.696772	0.306196	0.303605	Lower expr.
UCEC	FAS	OS	0.819017	0.585189	0.584583	Lower expr.
UCEC	FASLG	OS	0.551748	0.111454	0.106358	Lower expr.
UCEC	MLKL	OS	1.35344	0.401624	0.39987	Higher expr.
UCEC	RIPK1	OS	1.92412	0.0642269	0.0598841	Higher expr.
UCEC	RIPK3	OS	0.965175	0.919614	0.91961	Lower expr.
UCEC	TLR3	OS	0.988501	0.973675	0.973675	Lower expr.
UCEC	TNF	OS	0.952682	0.889921	0.889911	Lower expr.
UCS	FADD	OS	0.783183	0.47707	0.473607	Lower expr.
UCS	FAS	OS	1.20775	0.578288	0.579994	Higher expr.
UCS	FASLG	OS	1.19917	0.59393	0.595638	Higher expr.
UCS	MLKL	OS	1.04482	0.898211	0.898365	Higher expr.
UCS	RIPK1	OS	1.15299	0.68334	0.683008	Higher expr.
UCS	RIPK3	OS	0.796354	0.512775	0.511736	Lower expr.
UCS	TLR3	OS	0.548926	0.0837258	0.079731	Lower expr.
UCS	TNF	OS	1.24299	0.523568	0.522629	Higher expr.
UVM	FADD	OS	1.70097	0.218918	0.21429	Higher expr.
UVM	FAS	OS	1.87713	0.155886	0.149595	Higher expr.
UVM	FASLG	OS	3.82964	0.00439563	0.00247743	Higher expr.
UVM	MLKL	OS	1.60304	0.262658	0.258446	Higher expr.
UVM	RIPK1	OS	0.773896	0.540914	0.539834	Lower expr.
UVM	RIPK3	OS	1.30395	0.530705	0.529578	Higher expr.
UVM	TLR3	OS	0.913831	0.833543	0.833495	Lower expr.
UVM	TNF	OS	2.49817	0.0382533	0.0322351	Higher expr.
