# Supplementary material for: Multi-omics analysis reveals the panoramic picture of necroptosis-related regulators in pan-cancer
Source: Aging (Albany NY). 2022 Jun 21;14(12):5034–58. doi: 10.18632/aging.204124 (PMC9271292; doi:10.18632/aging.204124)
Supplement: Supplementary Material 20 [file aging-14-204124-s020.xlsx]

## Sheet: SheetName
cancertype	symbol	fc	trend	pval	fdr	entrez
BLCA	RIPK1	0.0960492	Up	0.0278792	0.0284239	8737
BLCA	TLR3	0.0223005	Up	4.91516e-06	8.74123e-06	7098
BRCA	FAS	0.267059	Up	9.29658e-54	6.21284e-53	355
BRCA	FASLG	-0.0161742	Down	0.0360081	0.0362143	356
BRCA	TLR3	0.0136345	Up	3.05671e-06	4.27709e-06	7098
BRCA	TNF	-0.0930879	Down	3.39784e-33	1.247e-32	7124
COAD	FAS	0.0328714	Up	7.67423e-07	1.31883e-06	355
COAD	FASLG	0.0226325	Up	0.00830376	0.00913989	356
COAD	MLKL	0.0770963	Up	1.25415e-06	2.11717e-06	197259
COAD	RIPK3	-0.0104098	Down	0.0158616	0.0166863	11035
COAD	TLR3	0.0100707	Up	3.4112e-11	8.16052e-11	7098
COAD	TNF	0.0506109	Up	2.028e-05	3.0715e-05	7124
ESCA	FADD	-0.00224115	Down	0.0206156	0.020827	8772
ESCA	RIPK3	0.126614	Up	0.000162095	0.000482443	11035
ESCA	TLR3	0.0334976	Up	1.57746e-08	2.86338e-07	7098
HNSC	FADD	-0.0018007	Down	0.00794304	0.00883522	8772
HNSC	FAS	0.0402487	Up	0.000360001	0.000474785	355
HNSC	FASLG	-0.0513514	Down	2.20581e-07	4.00502e-07	356
HNSC	RIPK1	0.2843	Up	2.47112e-18	8.85473e-18	8737
HNSC	RIPK3	0.035993	Up	3.2472e-05	4.8197e-05	11035
HNSC	TNF	-0.098517	Down	2.06401e-06	3.45947e-06	7124
KIRC	FAS	-0.233905	Down	3.26092e-73	5.88132e-72	355
KIRC	FASLG	-0.0647678	Down	2.22846e-48	1.50072e-47	356
KIRC	MLKL	-0.355457	Down	2.06981e-134	4.38769e-132	197259
KIRC	RIPK1	-0.164801	Down	4.23694e-34	1.6691e-33	8737
KIRC	RIPK3	0.0410402	Up	0.000172063	0.000203227	11035
KIRC	TLR3	-0.0301908	Down	0.000124351	0.000148358	7098
KIRC	TNF	-0.0483216	Down	4.57394e-19	1.05459e-18	7124
KIRP	FADD	-0.00399958	Down	0.0164452	0.0173106	8772
KIRP	FAS	0.0364521	Up	2.83787e-07	5.04388e-07	355
KIRP	MLKL	-0.0353498	Down	0.00186815	0.00223043	197259
KIRP	RIPK1	0.143646	Up	2.91294e-15	9.7628e-15	8737
KIRP	RIPK3	0.158558	Up	1.03023e-18	4.34587e-18	11035
KIRP	TLR3	0.0093809	Up	3.76525e-06	6.00753e-06	7098
KIRP	TNF	-0.0822927	Down	7.4924e-06	1.1608e-05	7124
LIHC	RIPK1	-0.0343758	Down	0.0123771	0.0131319	8737
LIHC	RIPK3	0.096314	Up	5.41421e-10	9.8484e-10	11035
LIHC	TLR3	0.0507391	Up	4.2677e-26	1.85819e-25	7098
LIHC	TNF	-0.05218	Down	0.00199757	0.00228723	7124
LUAD	FASLG	-0.0581193	Down	3.05805e-07	4.98558e-07	356
LUAD	MLKL	-0.0353498	Down	0.00238083	0.00276982	197259
LUAD	RIPK3	0.0686438	Up	1.00947e-14	2.85362e-14	11035
LUAD	TLR3	0.0217248	Up	1.1005e-05	1.5904e-05	7098
LUAD	TNF	-0.0432107	Down	5.91623e-07	9.45216e-07	7124
LUSC	FADD	0.0034858	Up	0.038659	0.0388246	8772
LUSC	FAS	0.0222634	Up	0.0220737	0.0224762	355
LUSC	FASLG	-0.0344618	Down	4.26502e-07	5.60616e-07	356
LUSC	RIPK3	0.157362	Up	2.14622e-65	4.2603e-64	11035
LUSC	TLR3	0.0236022	Up	1.42759e-19	3.54167e-19	7098
LUSC	TNF	-0.0792327	Down	4.25069e-10	6.50947e-10	7124
PAAD	MLKL	-0.0915515	Down	0.00229977	0.0036034	197259
PAAD	TLR3	0.0378214	Up	1.4816e-05	5.514e-05	7098
PRAD	FADD	-0.0142146	Down	4.20792e-11	9.7132e-11	8772
PRAD	FASLG	0.0240403	Up	0.00411786	0.00456514	356
PRAD	MLKL	0.0571563	Up	5.49994e-06	7.95459e-06	197259
PRAD	RIPK1	0.0962719	Up	1.11529e-09	2.24228e-09	8737
PRAD	RIPK3	0.239181	Up	6.74997e-19	3.32462e-18	11035
PRAD	TLR3	0.055749	Up	1.15581e-13	3.42725e-13	7098
PRAD	TNF	0.198299	Up	6.72281e-17	2.68855e-16	7124
THCA	FADD	-0.0140848	Down	4.59065e-11	1.52231e-10	8772
THCA	MLKL	-0.142757	Down	6.10046e-15	2.78863e-14	197259
THCA	RIPK1	0.0166195	Up	0.0212495	0.0215046	8737
THCA	TLR3	0.0141419	Up	0.000569254	0.00082581	7098
UCEC	FAS	0.0967958	Up	0.000184673	0.000237754	355
UCEC	MLKL	-0.0587315	Down	0.0176685	0.0185875	197259
UCEC	TLR3	0.0095571	Up	0.0152301	0.0161553	7098
