# Supplementary material for: Multi-omics analysis reveals the panoramic picture of necroptosis-related regulators in pan-cancer
Source: Aging (Albany NY). 2022 Jun 21;14(12):5034–58. doi: 10.18632/aging.204124 (PMC9271292; doi:10.18632/aging.204124)
Supplement: Supplementary Material 21 [file aging-14-204124-s021.xlsx]

## Sheet: SheetName
cancertype	symbol	cor	fdr	entrez
ACC	FADD	-0.202434	0.0736718	8772
ACC	FAS	-0.299221	0.00759049	355
ACC	FASLG	-0.37912	0.000569862	356
ACC	MLKL	-0.451047	3.6797e-05	197259
ACC	RIPK1	-0.286952	0.0105726	8737
ACC	RIPK3	-0.68223	0	11035
ACC	TLR3	-0.358325	0.00126672	7098
ACC	TNF	-0.328534	0.00311602	7124
BLCA	FADD	-0.302812	5.19868e-10	8772
BLCA	FAS	-0.506605	0	355
BLCA	FASLG	-0.246062	4.84028e-07	356
BLCA	MLKL	-0.16595	0.000776686	197259
BLCA	RIPK1	-0.137942	0.00528539	8737
BLCA	RIPK3	-0.550358	0	11035
BLCA	TLR3	-0.215056	1.2336e-05	7098
BLCA	TNF	-0.230674	2.49244e-06	7124
BRCA	FADD	-0.354764	0	8772
BRCA	FAS	-0.510964	3.11696e-46	355
BRCA	FASLG	-0.618665	1.20585e-72	356
BRCA	MLKL	-0.47588	0	197259
BRCA	RIPK1	-0.167579	1.1868e-05	8737
BRCA	RIPK3	-0.694804	1.44912e-98	11035
BRCA	TLR3	-0.193462	4.00591e-07	7098
BRCA	TNF	-0.390905	0	7124
CESC	FADD	-0.196615	0.000578277	8772
CESC	FAS	-0.0521049	0.365073	355
CESC	FASLG	-0.4909	7.65978e-20	356
CESC	MLKL	-0.312368	3.13499e-08	197259
CESC	RIPK1	-0.171722	0.00269563	8737
CESC	RIPK3	-0.547763	0	11035
CESC	TLR3	-0.307971	4.96142e-08	7098
CESC	TNF	-0.3557	2.26637e-10	7124
CHOL	FADD	-0.241184	0.156074	8772
CHOL	FAS	-0.279022	0.0994672	355
CHOL	FASLG	-0.608494	0.000113955	356
CHOL	MLKL	-0.177091	0.300252	197259
CHOL	RIPK1	-0.397169	0.0170875	8737
CHOL	RIPK3	-0.714543	2.40452e-06	11035
CHOL	TLR3	-0.267954	0.114071	7098
CHOL	TNF	-0.436551	0.00827444	7124
COAD	FADD	-0.137336	0.0240821	8772
COAD	FAS	-0.300186	5.68614e-07	355
COAD	FASLG	-0.43683	5.23134e-14	356
COAD	MLKL	-0.243648	5.4811e-05	197259
COAD	RIPK1	-0.152025	0.0124494	8737
COAD	RIPK3	-0.227809	0.000159571	11035
COAD	TLR3	-0.243343	5.6027e-05	7098
COAD	TNF	-0.251892	2.9925e-05	7124
DLBC	FADD	0.0127008	0.931745	8772
DLBC	FAS	-0.156644	0.286703	355
DLBC	FASLG	-0.401216	0.00500214	356
DLBC	MLKL	-0.327725	0.0234237	197259
DLBC	RIPK1	-0.203973	0.163935	8737
DLBC	RIPK3	-0.401324	0.00498952	11035
DLBC	TLR3	-0.283109	0.0515417	7098
DLBC	TNF	-0.148611	0.312372	7124
ESCA	FADD	-0.573884	0	8772
ESCA	FAS	-0.425714	1.6971e-09	355
ESCA	FASLG	-0.456608	7.28978e-11	356
ESCA	MLKL	-0.45849	8.3631e-11	197259
ESCA	RIPK1	-0.311059	1.9007e-05	8737
ESCA	RIPK3	-0.745252	0	11035
ESCA	TLR3	-0.300379	3.7265e-05	7098
ESCA	TNF	-0.450151	1.44492e-10	7124
GBM	FADD	-0.225882	0.110906	8772
GBM	FAS	-0.426063	0.00199363	355
GBM	FASLG	-0.0373599	0.794648	356
GBM	MLKL	-0.414389	0.00270167	197259
GBM	RIPK1	-0.451403	0.000994931	8737
GBM	RIPK3	-0.374842	0.00704266	11035
GBM	TLR3	-0.186878	0.188615	7098
GBM	TNF	-0.176923	0.213584	7124
HNSC	FADD	-0.559265	0	8772
HNSC	FAS	-0.137418	0.0016982	355
HNSC	FASLG	-0.461096	9.79375e-29	356
HNSC	MLKL	-0.222406	3.21964e-07	197259
HNSC	RIPK1	-0.176598	5.2776e-05	8737
HNSC	RIPK3	-0.455543	0	11035
HNSC	TLR3	-0.0883378	0.0440881	7098
HNSC	TNF	-0.204328	2.62934e-06	7124
KICH	FADD	-0.310343	0.0114926	8772
KICH	FAS	-0.124267	0.319348	355
KICH	FASLG	-0.533896	3.90319e-06	356
KICH	MLKL	-0.395929	0.00108902	197259
KICH	RIPK1	-0.280994	0.0225963	8737
KICH	RIPK3	-0.403031	0.000793077	11035
KICH	TLR3	-0.30287	0.0137336	7098
KICH	TNF	-0.471975	6.3158e-05	7124
KIRC	FADD	-0.170317	0.00233553	8772
KIRC	FAS	-0.16941	0.00246603	355
KIRC	FASLG	-0.687138	0	356
KIRC	MLKL	-0.447518	0	197259
KIRC	RIPK1	-0.179309	0.00134337	8737
KIRC	RIPK3	-0.376412	3.83961e-12	11035
KIRC	TLR3	-0.139916	0.0125612	7098
KIRC	TNF	-0.220753	7.1818e-05	7124
KIRP	FADD	-0.0987978	0.102675	8772
KIRP	FAS	0.00191546	0.974809	355
KIRP	FASLG	-0.640364	5.06827e-33	356
KIRP	MLKL	-0.196911	0.00107129	197259
KIRP	RIPK1	-0.368564	4.12527e-10	8737
KIRP	RIPK3	-0.760366	0	11035
KIRP	TLR3	-0.213371	0.000386313	7098
KIRP	TNF	-0.594359	1.46663e-27	7124
LAML	FADD	-0.206859	0.00688608	8772
LAML	FAS	-0.123234	0.109322	355
LAML	FASLG	-0.665138	4.49917e-23	356
LAML	MLKL	-0.367517	9.88782e-07	197259
LAML	RIPK1	-0.163154	0.033618	8737
LAML	RIPK3	-0.32187	2.0699e-05	11035
LAML	TLR3	-0.215381	0.00479198	7098
LAML	TNF	0.0419674	0.586861	7124
LGG	FADD	-0.137571	0.00174903	8772
LGG	FAS	-0.475738	0	355
LGG	FASLG	-0.307629	8.99777e-13	356
LGG	MLKL	-0.428562	0	197259
LGG	RIPK1	-0.296961	7.30593e-12	8737
LGG	RIPK3	-0.459376	0	11035
LGG	TLR3	-0.21891	5.4777e-07	7098
LGG	TNF	-0.026197	0.552565	7124
LIHC	FADD	-0.14191	0.00621875	8772
LIHC	FAS	0.0155345	0.765426	355
LIHC	FASLG	-0.542107	9.98639e-30	356
LIHC	MLKL	-0.302566	3.26204e-09	197259
LIHC	RIPK1	-0.341075	1.96546e-11	8737
LIHC	RIPK3	-0.70255	1.7911e-56	11035
LIHC	TLR3	-0.410821	0	7098
LIHC	TNF	-0.409188	2.07854e-16	7124
LUAD	FADD	-0.10143	0.030748	8772
LUAD	FAS	-0.334821	3.19383e-13	355
LUAD	FASLG	-0.548502	5.07044e-37	356
LUAD	MLKL	-0.426171	0	197259
LUAD	RIPK1	-0.128465	0.00615516	8737
LUAD	RIPK3	-0.374356	8.36099e-17	11035
LUAD	TLR3	-0.0800125	0.0885875	7098
LUAD	TNF	-0.342966	7.62287e-14	7124
LUSC	FADD	-0.447601	0	8772
LUSC	FAS	-0.18274	0.000411947	355
LUSC	FASLG	-0.402091	7.53858e-16	356
LUSC	MLKL	-0.383368	2.23423e-14	197259
LUSC	RIPK1	-0.27018	1.40901e-07	8737
LUSC	RIPK3	-0.484814	0	11035
LUSC	TLR3	-0.304525	2.55875e-09	7098
LUSC	TNF	-0.291382	1.26192e-08	7124
MESO	FADD	-0.308285	0.0038082	8772
MESO	FAS	-0.41793	6.5711e-05	355
MESO	FASLG	-0.544926	8.23472e-08	356
MESO	MLKL	-0.392451	0.000191021	197259
MESO	RIPK1	-0.229077	0.0330346	8737
MESO	RIPK3	-0.480717	3.28748e-06	11035
MESO	TLR3	-0.226106	0.0354261	7098
MESO	TNF	-0.396242	0.000163805	7124
OV	FADD	-0.833333	0.0082672	8772
OV	FAS	-0.583333	0.107997	355
OV	FASLG	-0.6	0.0967978	356
OV	MLKL	-0.45	0.229817	197259
OV	RIPK1	-0.55	0.132777	8737
OV	RIPK3	-0.883333	0.0030754	11035
OV	TLR3	-0.866667	0.00450838	7098
OV	TNF	-0.883333	0.0030754	7124
PAAD	FADD	-0.0911377	0.226089	8772
PAAD	FAS	-0.18101	0.0157106	355
PAAD	FASLG	-0.576074	0	356
PAAD	MLKL	-0.314742	2.0725e-05	197259
PAAD	RIPK1	-0.153389	0.0410234	8737
PAAD	RIPK3	-0.478859	1.35882e-11	11035
PAAD	TLR3	-0.190643	0.0108996	7098
PAAD	TNF	-0.367388	5.51979e-07	7124
PCPG	FADD	-0.251093	0.00072329	8772
PCPG	FAS	-0.396899	4.97265e-08	355
PCPG	FASLG	-0.103801	0.166735	356
PCPG	MLKL	-0.184205	0.013673	197259
PCPG	RIPK1	-0.395089	5.7747e-08	8737
PCPG	RIPK3	-0.182736	0.0144522	11035
PCPG	TLR3	-0.272144	0.000240458	7098
PCPG	TNF	-0.209303	0.00492525	7124
PRAD	FADD	-0.212499	1.85378e-06	8772
PRAD	FAS	-0.296435	1.93168e-11	355
PRAD	FASLG	-0.432517	4.49447e-24	356
PRAD	MLKL	-0.308561	2.60844e-12	197259
PRAD	RIPK1	-0.254363	1.00044e-08	8737
PRAD	RIPK3	-0.744301	0	11035
PRAD	TLR3	-0.328684	7.46781e-14	7098
PRAD	TNF	-0.245239	3.05486e-08	7124
READ	FADD	-0.377017	0.000234719	8772
READ	FAS	-0.16519	0.115483	355
READ	FASLG	-0.2052	0.0498876	356
READ	MLKL	-0.287148	0.00566898	197259
READ	RIPK1	-0.432255	2.0449e-05	8737
READ	RIPK3	-0.242991	0.0198128	11035
READ	TLR3	-0.31526	0.00230503	7098
READ	TNF	-0.226253	0.0303114	7124
SARC	FADD	-0.148178	0.0170875	8772
SARC	FAS	-0.203531	0.00100836	355
SARC	FASLG	-0.468432	1.56738e-15	356
SARC	MLKL	-0.357824	3.9562e-09	197259
SARC	RIPK1	-0.157791	0.0110541	8737
SARC	RIPK3	-0.581454	7.97197e-25	11035
SARC	TLR3	-0.35436	4.44346e-09	7098
SARC	TNF	-0.273203	8.1704e-06	7124
SKCM	FADD	-0.285288	3.74165e-10	8772
SKCM	FAS	-0.505561	0	355
SKCM	FASLG	-0.72598	5.96153e-78	356
SKCM	MLKL	-0.495252	0	197259
SKCM	RIPK1	-0.277977	1.06982e-09	8737
SKCM	RIPK3	-0.747311	0	11035
SKCM	TLR3	-0.161811	0.000434644	7098
SKCM	TNF	-0.459411	7.26757e-26	7124
STAD	FADD	-0.21347	3.4452e-05	8772
STAD	FAS	-0.207774	5.5917e-05	355
STAD	FASLG	-0.414539	7.00542e-17	356
STAD	MLKL	-0.290421	1.35178e-08	197259
STAD	RIPK1	-0.234187	5.3085e-06	8737
STAD	RIPK3	-0.436592	0	11035
STAD	TLR3	-0.292522	8.96641e-09	7098
STAD	TNF	-0.218825	2.1599e-05	7124
TGCT	FADD	-0.338538	2.529e-05	8772
TGCT	FAS	-0.0138904	0.865884	355
TGCT	FASLG	-0.549758	0	356
TGCT	MLKL	-0.174762	0.0325552	197259
TGCT	RIPK1	-0.206116	0.0115064	8737
TGCT	RIPK3	-0.396819	6.23628e-07	11035
TGCT	TLR3	0.124075	0.130246	7098
TGCT	TNF	-0.43659	3.28209e-08	7124
THCA	FADD	-0.150715	0.000687628	8772
THCA	FAS	-0.364092	2.82567e-17	355
THCA	FASLG	-0.505942	3.53427e-34	356
THCA	MLKL	-0.371028	0	197259
THCA	RIPK1	-0.211664	1.68537e-06	8737
THCA	RIPK3	-0.421438	0	11035
THCA	TLR3	-0.119206	0.00735313	7098
THCA	TNF	-0.355987	1.55977e-16	7124
THYM	FADD	-0.241482	0.00801498	8772
THYM	FAS	-0.686374	0	355
THYM	FASLG	-0.498323	6.96591e-09	356
THYM	MLKL	-0.24708	0.00663986	197259
THYM	RIPK1	-0.272526	0.00268256	8737
THYM	RIPK3	-0.485957	2.82406e-08	11035
THYM	TLR3	-0.22846	0.0122313	7098
THYM	TNF	-0.36397	4.9367e-05	7124
UCEC	FADD	-0.366398	9.24527e-07	8772
UCEC	FAS	-0.150704	0.0485336	355
UCEC	FASLG	-0.506846	1.29886e-12	356
UCEC	MLKL	-0.371298	6.47028e-07	197259
UCEC	RIPK1	-0.129889	0.0894528	8737
UCEC	RIPK3	-0.615759	0	11035
UCEC	TLR3	-0.384177	2.46523e-07	7098
UCEC	TNF	0.108393	0.156824	7124
UCS	FADD	-0.140264	0.297153	8772
UCS	FAS	-0.376005	0.00416791	355
UCS	FASLG	-0.219283	0.101237	356
UCS	MLKL	-0.402191	0.00208037	197259
UCS	RIPK1	-0.209295	0.118049	8737
UCS	RIPK3	-0.814104	0	11035
UCS	TLR3	-0.492935	0.000120084	7098
UCS	TNF	0.195978	0.144007	7124
UVM	FADD	-0.140014	0.214984	8772
UVM	FAS	-0.370722	0.000770565	355
UVM	FASLG	-0.589677	8.65328e-09	356
UVM	MLKL	-0.552508	1.81866e-07	197259
UVM	RIPK1	-0.368894	0.000821093	8737
UVM	RIPK3	-0.805649	0	11035
UVM	TLR3	-0.134857	0.232487	7098
UVM	TNF	-0.430659	6.6761e-05	7124
