# Supplementary material for: Multi-omics analysis reveals the panoramic picture of necroptosis-related regulators in pan-cancer
Source: Aging (Albany NY). 2022 Jun 21;14(12):5034–58. doi: 10.18632/aging.204124 (PMC9271292; doi:10.18632/aging.204124)
Supplement: Supplementary Material 22 [file aging-14-204124-s022.xlsx]

## Sheet: SheetName
cancertype	symbol	sur_type	log_rank_p	cox_p	HR	higher_risk_of_death	entrez
ACC	FADD	OS	0.996078	0.993984	0.997191	Lower meth.	8772
ACC	FAS	OS	0.0497882	0.0553211	2.16163	Higher meth.	355
ACC	FASLG	OS	0.122717	0.127488	1.794	Higher meth.	356
ACC	MLKL	OS	0.0278749	0.0327336	2.36086	Higher meth.	197259
ACC	RIPK1	OS	0.157188	0.162333	0.585041	Lower meth.	8737
ACC	RIPK3	OS	0.00770001	0.010368	2.75656	Higher meth.	11035
ACC	TLR3	OS	0.0199919	0.0236174	2.42948	Higher meth.	7098
ACC	TNF	OS	0.564789	0.563969	1.24079	Higher meth.	7124
BLCA	FADD	OS	0.712628	0.712329	1.05667	Higher meth.	8772
BLCA	FAS	OS	0.34286	0.343855	1.15187	Higher meth.	355
BLCA	FASLG	OS	0.0268198	0.0275378	1.39157	Higher meth.	356
BLCA	MLKL	OS	0.178842	0.179374	1.22249	Higher meth.	197259
BLCA	RIPK1	OS	0.446985	0.447627	1.12118	Higher meth.	8737
BLCA	RIPK3	OS	0.0566827	0.0575221	1.33093	Higher meth.	11035
BLCA	TLR3	OS	0.912163	0.91106	0.983433	Lower meth.	7098
BLCA	TNF	OS	0.438821	0.439053	1.12258	Higher meth.	7124
BRCA	FADD	OS	0.491509	0.491898	0.866586	Lower meth.	8772
BRCA	FAS	OS	0.0660429	0.0676692	0.679654	Lower meth.	355
BRCA	FASLG	OS	0.967325	0.967609	1.00848	Higher meth.	356
BRCA	MLKL	OS	0.167653	0.169143	0.747323	Lower meth.	197259
BRCA	RIPK1	OS	0.0653601	0.0669996	0.681487	Lower meth.	8737
BRCA	RIPK3	OS	0.376413	0.3769	1.20252	Higher meth.	11035
BRCA	TLR3	OS	0.0730022	0.0747622	1.47033	Higher meth.	7098
BRCA	TNF	OS	0.144362	0.145903	1.36	Higher meth.	7124
CESC	FADD	OS	0.262502	0.26367	1.30268	Higher meth.	8772
CESC	FAS	OS	0.73497	0.735782	1.08287	Higher meth.	355
CESC	FASLG	OS	0.0170149	0.0185066	1.76356	Higher meth.	356
CESC	MLKL	OS	0.313472	0.314237	0.787296	Lower meth.	197259
CESC	RIPK1	OS	0.855541	0.85524	1.04399	Higher meth.	8737
CESC	RIPK3	OS	0.584355	0.584643	0.878926	Lower meth.	11035
CESC	TLR3	OS	0.946063	0.94612	1.01613	Higher meth.	7098
CESC	TNF	OS	0.276615	0.278623	1.29448	Higher meth.	7124
CHOL	FADD	OS	0.191124	0.198704	0.5251	Lower meth.	8772
CHOL	FAS	OS	0.265938	0.271923	1.75573	Higher meth.	355
CHOL	FASLG	OS	0.765056	0.765244	1.1527	Higher meth.	356
CHOL	MLKL	OS	0.00149134	0.00512684	0.167428	Lower meth.	197259
CHOL	RIPK1	OS	0.930802	0.930807	0.958363	Lower meth.	8737
CHOL	RIPK3	OS	0.141272	0.150356	0.463049	Lower meth.	11035
CHOL	TLR3	OS	0.864293	0.864331	1.08689	Higher meth.	7098
CHOL	TNF	OS	0.535956	0.537439	1.34908	Higher meth.	7124
COAD	FADD	OS	0.530033	0.530159	0.857366	Lower meth.	8772
COAD	FAS	OS	0.92612	0.926128	0.977637	Lower meth.	355
COAD	FASLG	OS	0.625533	0.625409	1.1275	Higher meth.	356
COAD	MLKL	OS	0.00559994	0.00649883	1.97483	Higher meth.	197259
COAD	RIPK1	OS	0.319376	0.320766	1.27204	Higher meth.	8737
COAD	RIPK3	OS	0.861659	0.862034	1.04311	Higher meth.	11035
COAD	TLR3	OS	0.924922	0.924925	0.977418	Lower meth.	7098
COAD	TNF	OS	0.0922791	0.0946119	1.51726	Higher meth.	7124
DLBC	FADD	OS	0.696483	0.697413	1.33449	Higher meth.	8772
DLBC	FAS	OS	0.61255	0.614529	1.44575	Higher meth.	355
DLBC	FASLG	OS	0.718492	0.719235	1.30561	Higher meth.	356
DLBC	MLKL	OS	0.303955	0.314049	0.470252	Lower meth.	197259
DLBC	RIPK1	OS	0.928585	0.928597	0.938459	Lower meth.	8737
DLBC	RIPK3	OS	0.243393	0.256579	2.29934	Higher meth.	11035
DLBC	TLR3	OS	0.0799872	0.101703	0.253932	Lower meth.	7098
DLBC	TNF	OS	0.798342	0.798606	1.19826	Higher meth.	7124
ESCA	FADD	OS	0.101911	0.103698	0.683973	Lower meth.	8772
ESCA	FAS	OS	0.0925496	0.0942769	1.47401	Higher meth.	355
ESCA	FASLG	OS	0.873066	0.873017	1.03759	Higher meth.	356
ESCA	MLKL	OS	0.542788	0.543244	1.15632	Higher meth.	197259
ESCA	RIPK1	OS	0.668645	0.669371	0.905065	Lower meth.	8737
ESCA	RIPK3	OS	0.637931	0.637405	0.893362	Lower meth.	11035
ESCA	TLR3	OS	0.154998	0.156881	1.38329	Higher meth.	7098
ESCA	TNF	OS	0.521155	0.521632	0.862992	Lower meth.	7124
GBM	FADD	OS	0.185083	0.186367	0.757082	Lower meth.	8772
GBM	FAS	OS	0.974691	0.975669	0.993668	Lower meth.	355
GBM	FASLG	OS	0.0799823	0.0814502	0.692482	Lower meth.	356
GBM	MLKL	OS	0.263662	0.265599	0.792885	Lower meth.	197259
GBM	RIPK1	OS	0.0701692	0.0709217	1.46148	Higher meth.	8737
GBM	RIPK3	OS	0.735716	0.737334	0.93228	Lower meth.	11035
GBM	TLR3	OS	0.080702	0.0829542	0.693179	Lower meth.	7098
GBM	TNF	OS	0.456047	0.457661	1.16757	Higher meth.	7124
HNSC	FADD	OS	0.0523932	0.0531063	0.769565	Lower meth.	8772
HNSC	FAS	OS	0.00382073	0.00405259	1.47984	Higher meth.	355
HNSC	FASLG	OS	0.00731303	0.00763531	1.43539	Higher meth.	356
HNSC	MLKL	OS	0.0587522	0.059341	1.29197	Higher meth.	197259
HNSC	RIPK1	OS	0.695859	0.696011	0.94857	Lower meth.	8737
HNSC	RIPK3	OS	0.0351469	0.0357793	1.32928	Higher meth.	11035
HNSC	TLR3	OS	0.682623	0.682758	0.946483	Lower meth.	7098
HNSC	TNF	OS	0.000545589	0.000613947	1.59954	Higher meth.	7124
KICH	FADD	OS	0.716521	0.717187	1.2751	Higher meth.	8772
KICH	FAS	OS	0.185789	0.204836	2.76437	Higher meth.	355
KICH	FASLG	OS	0.537673	0.540498	0.662749	Lower meth.	356
KICH	MLKL	OS	0.537113	0.539964	0.662772	Lower meth.	197259
KICH	RIPK1	OS	0.230183	0.243387	2.28201	Higher meth.	8737
KICH	RIPK3	OS	0.9175	0.917516	1.07218	Higher meth.	11035
KICH	TLR3	OS	0.784538	0.784828	0.83216	Lower meth.	7098
KICH	TNF	OS	0.564312	0.566693	0.680664	Lower meth.	7124
KIRC	FADD	OS	0.905292	0.905016	1.02362	Higher meth.	8772
KIRC	FAS	OS	0.0152164	0.016218	0.616727	Lower meth.	355
KIRC	FASLG	OS	0.91854	0.918845	0.980236	Lower meth.	356
KIRC	MLKL	OS	0.179425	0.180722	0.767277	Lower meth.	197259
KIRC	RIPK1	OS	0.000192078	0.000268573	2.11855	Higher meth.	8737
KIRC	RIPK3	OS	0.257217	0.258215	0.801153	Lower meth.	11035
KIRC	TLR3	OS	0.000211516	0.000290441	2.09024	Higher meth.	7098
KIRC	TNF	OS	0.723897	0.723982	0.933247	Lower meth.	7124
KIRP	FADD	OS	0.411833	0.41311	0.77053	Lower meth.	8772
KIRP	FAS	OS	0.547839	0.548438	0.826757	Lower meth.	355
KIRP	FASLG	OS	0.0622673	0.066363	0.543981	Lower meth.	356
KIRP	MLKL	OS	0.0107727	0.0131124	2.28397	Higher meth.	197259
KIRP	RIPK1	OS	0.0139794	0.016633	2.21386	Higher meth.	8737
KIRP	RIPK3	OS	0.423866	0.425096	0.775692	Lower meth.	11035
KIRP	TLR3	OS	0.093487	0.097315	0.582649	Lower meth.	7098
KIRP	TNF	OS	0.399709	0.401097	1.30647	Higher meth.	7124
LAML	FADD	OS	0.858646	0.849107	0.965446	Lower meth.	8772
LAML	FAS	OS	0.478629	0.484404	0.87893	Lower meth.	355
LAML	FASLG	OS	0.66455	0.65545	0.920877	Lower meth.	356
LAML	MLKL	OS	0.0655736	0.0682794	0.712692	Lower meth.	197259
LAML	RIPK1	OS	0.527783	0.51764	0.8875	Lower meth.	8737
LAML	RIPK3	OS	0.0238459	0.0250275	0.659275	Lower meth.	11035
LAML	TLR3	OS	0.0848585	0.0832244	0.724639	Lower meth.	7098
LAML	TNF	OS	0.404228	0.399009	1.16877	Higher meth.	7124
LGG	FADD	OS	0.072151	0.0734177	0.72189	Lower meth.	8772
LGG	FAS	OS	1.43571e-06	2.87236e-06	0.414345	Lower meth.	355
LGG	FASLG	OS	0.00015289	0.000205494	0.497888	Lower meth.	356
LGG	MLKL	OS	1.46425e-09	9.99205e-09	0.314948	Lower meth.	197259
LGG	RIPK1	OS	1.23456e-06	2.61258e-06	0.411075	Lower meth.	8737
LGG	RIPK3	OS	6.29553e-07	1.4256e-06	0.399008	Lower meth.	11035
LGG	TLR3	OS	0.146838	0.147952	0.771103	Lower meth.	7098
LGG	TNF	OS	0.000175969	0.000226159	0.508749	Lower meth.	7124
LIHC	FADD	OS	0.996453	0.996614	0.99926	Lower meth.	8772
LIHC	FAS	OS	0.473296	0.472932	0.882056	Lower meth.	355
LIHC	FASLG	OS	0.573699	0.573427	1.10353	Higher meth.	356
LIHC	MLKL	OS	0.564872	0.564742	0.904046	Lower meth.	197259
LIHC	RIPK1	OS	0.446974	0.447783	0.875424	Lower meth.	8737
LIHC	RIPK3	OS	0.312381	0.313192	1.19272	Higher meth.	11035
LIHC	TLR3	OS	0.241868	0.242758	0.81275	Lower meth.	7098
LIHC	TNF	OS	0.928387	0.929574	1.01553	Higher meth.	7124
LUAD	FADD	OS	0.888828	0.88921	1.02234	Higher meth.	8772
LUAD	FAS	OS	0.337922	0.338538	1.16342	Higher meth.	355
LUAD	FASLG	OS	0.0125826	0.0131942	1.49204	Higher meth.	356
LUAD	MLKL	OS	0.797909	0.797173	0.960189	Lower meth.	197259
LUAD	RIPK1	OS	0.1305	0.131357	1.27173	Higher meth.	8737
LUAD	RIPK3	OS	0.172656	0.173718	1.24184	Higher meth.	11035
LUAD	TLR3	OS	0.561247	0.561059	1.09606	Higher meth.	7098
LUAD	TNF	OS	0.167526	0.168428	1.24457	Higher meth.	7124
LUSC	FADD	OS	0.422518	0.422767	0.878056	Lower meth.	8772
LUSC	FAS	OS	0.266276	0.266741	1.19646	Higher meth.	355
LUSC	FASLG	OS	0.898032	0.898068	0.979474	Lower meth.	356
LUSC	MLKL	OS	0.652427	0.652685	0.929951	Lower meth.	197259
LUSC	RIPK1	OS	0.460568	0.461539	0.886995	Lower meth.	8737
LUSC	RIPK3	OS	0.50529	0.505481	0.89812	Lower meth.	11035
LUSC	TLR3	OS	0.945539	0.945745	0.989053	Lower meth.	7098
LUSC	TNF	OS	0.43636	0.436726	1.13385	Higher meth.	7124
MESO	FADD	OS	0.938098	0.940306	1.0181	Higher meth.	8772
MESO	FAS	OS	0.674762	0.67499	1.10414	Higher meth.	355
MESO	FASLG	OS	0.445369	0.446037	0.83407	Lower meth.	356
MESO	MLKL	OS	0.0465986	0.0485334	1.62348	Higher meth.	197259
MESO	RIPK1	OS	0.0819042	0.0839403	0.654819	Lower meth.	8737
MESO	RIPK3	OS	0.290577	0.291288	1.287	Higher meth.	11035
MESO	TLR3	OS	0.00289805	0.00346172	2.05211	Higher meth.	7098
MESO	TNF	OS	0.539163	0.53827	0.864521	Lower meth.	7124
OV	FADD	OS	0.167597	0.202263	0.23675	Lower meth.	8772
OV	FAS	OS	0.897245	0.897298	0.885956	Lower meth.	355
OV	FASLG	OS	0.979394	0.979395	0.976221	Lower meth.	356
OV	MLKL	OS	0.657687	0.659679	0.663806	Lower meth.	197259
OV	RIPK1	OS	0.897245	0.897298	0.885956	Lower meth.	8737
OV	RIPK3	OS	0.439951	0.448654	0.497534	Lower meth.	11035
OV	TLR3	OS	0.167597	0.202263	0.23675	Lower meth.	7098
OV	TNF	OS	0.579942	0.583689	0.602682	Lower meth.	7124
PAAD	FADD	OS	0.0131954	0.0142488	1.67438	Higher meth.	8772
PAAD	FAS	OS	0.701141	0.701332	0.925217	Lower meth.	355
PAAD	FASLG	OS	0.415695	0.41739	1.17798	Higher meth.	356
PAAD	MLKL	OS	0.499904	0.500465	0.87297	Lower meth.	197259
PAAD	RIPK1	OS	0.280101	0.281534	1.24335	Higher meth.	8737
PAAD	RIPK3	OS	0.34687	0.347832	0.827144	Lower meth.	11035
PAAD	TLR3	OS	0.174624	0.175965	0.760059	Lower meth.	7098
PAAD	TNF	OS	0.329378	0.329544	1.21904	Higher meth.	7124
PCPG	FADD	OS	0.0354059	0.998535	1.88486e-09	Lower meth.	8772
PCPG	FAS	OS	0.508106	0.513441	1.78211	Higher meth.	355
PCPG	FASLG	OS	0.0971528	0.136083	5.14268	Higher meth.	356
PCPG	MLKL	OS	0.188537	0.221653	3.82046	Higher meth.	197259
PCPG	RIPK1	OS	0.575285	0.57878	1.63217	Higher meth.	8737
PCPG	RIPK3	OS	0.257422	0.273448	2.66655	Higher meth.	11035
PCPG	TLR3	OS	0.507047	0.512425	1.78425	Higher meth.	7098
PCPG	TNF	OS	0.566044	0.569764	1.65154	Higher meth.	7124
PRAD	FADD	OS	0.445249	0.449584	1.63676	Higher meth.	8772
PRAD	FAS	OS	0.274112	0.284891	0.477438	Lower meth.	355
PRAD	FASLG	OS	0.588236	0.590106	0.706173	Lower meth.	356
PRAD	MLKL	OS	0.77593	0.776209	0.833026	Lower meth.	197259
PRAD	RIPK1	OS	0.368165	0.375418	1.85038	Higher meth.	8737
PRAD	RIPK3	OS	0.763312	0.763727	0.806276	Lower meth.	11035
PRAD	TLR3	OS	0.904544	0.904566	1.07953	Higher meth.	7098
PRAD	TNF	OS	0.688883	0.689626	0.773761	Lower meth.	7124
READ	FADD	OS	0.0736676	0.0840356	2.51361	Higher meth.	8772
READ	FAS	OS	0.547782	0.549091	0.737938	Lower meth.	355
READ	FASLG	OS	0.378342	0.381771	1.537	Higher meth.	356
READ	MLKL	OS	0.658711	0.659319	0.806929	Lower meth.	197259
READ	RIPK1	OS	0.89092	0.890939	1.07158	Higher meth.	8737
READ	RIPK3	OS	0.81059	0.810695	1.12356	Higher meth.	11035
READ	TLR3	OS	0.491208	0.493191	1.39601	Higher meth.	7098
READ	TNF	OS	0.357987	0.361894	1.57453	Higher meth.	7124
SARC	FADD	OS	0.408139	0.407325	0.846296	Lower meth.	8772
SARC	FAS	OS	0.000727583	0.00092379	1.98806	Higher meth.	355
SARC	FASLG	OS	0.468867	0.468915	1.15696	Higher meth.	356
SARC	MLKL	OS	0.225676	0.227034	0.782209	Lower meth.	197259
SARC	RIPK1	OS	0.632079	0.633366	0.908295	Lower meth.	8737
SARC	RIPK3	OS	0.515876	0.516078	1.13974	Higher meth.	11035
SARC	TLR3	OS	0.567052	0.567561	0.891159	Lower meth.	7098
SARC	TNF	OS	0.362543	0.363963	0.832832	Lower meth.	7124
SKCM	FADD	OS	0.291709	0.291911	0.867011	Lower meth.	8772
SKCM	FAS	OS	0.0677825	0.0684979	1.27949	Higher meth.	355
SKCM	FASLG	OS	0.000135994	0.00016029	1.67874	Higher meth.	356
SKCM	MLKL	OS	2.0791e-05	2.6654e-05	1.77479	Higher meth.	197259
SKCM	RIPK1	OS	0.00101656	0.00111532	0.641881	Lower meth.	8737
SKCM	RIPK3	OS	0.00502395	0.00529354	1.46146	Higher meth.	11035
SKCM	TLR3	OS	0.610466	0.610869	0.933731	Lower meth.	7098
SKCM	TNF	OS	0.315466	0.315637	1.14527	Higher meth.	7124
STAD	FADD	OS	0.490843	0.491482	1.11954	Higher meth.	8772
STAD	FAS	OS	0.498084	0.498696	0.895276	Lower meth.	355
STAD	FASLG	OS	0.321039	0.322196	0.850428	Lower meth.	356
STAD	MLKL	OS	0.0432751	0.0442787	1.39323	Higher meth.	197259
STAD	RIPK1	OS	0.496928	0.496761	0.894806	Lower meth.	8737
STAD	RIPK3	OS	0.384751	0.385948	1.15269	Higher meth.	11035
STAD	TLR3	OS	0.0091691	0.00968752	1.53475	Higher meth.	7098
STAD	TNF	OS	0.804088	0.803508	1.04152	Higher meth.	7124
TGCT	FADD	OS	0.715999	0.717375	1.4475	Higher meth.	8772
TGCT	FAS	OS	0.490054	0.500408	2.19975	Higher meth.	355
TGCT	FASLG	OS	0.478428	0.489455	2.24538	Higher meth.	356
TGCT	MLKL	OS	0.779778	0.780414	0.751225	Lower meth.	197259
TGCT	RIPK1	OS	0.278077	0.305785	0.306284	Lower meth.	8737
TGCT	RIPK3	OS	0.488932	0.499363	2.20356	Higher meth.	11035
TGCT	TLR3	OS	0.495007	0.505093	2.18028	Higher meth.	7098
TGCT	TNF	OS	0.495007	0.505093	2.18028	Higher meth.	7124
THCA	FADD	OS	0.859271	0.859318	1.09357	Higher meth.	8772
THCA	FAS	OS	0.968401	0.968401	0.980373	Lower meth.	355
THCA	FASLG	OS	0.289961	0.295795	1.71633	Higher meth.	356
THCA	MLKL	OS	0.360536	0.364879	0.625868	Lower meth.	197259
THCA	RIPK1	OS	0.159626	0.169226	2.09977	Higher meth.	8737
THCA	RIPK3	OS	0.258612	0.265131	1.77961	Higher meth.	11035
THCA	TLR3	OS	0.302297	0.30785	1.69404	Higher meth.	7098
THCA	TNF	OS	0.0967364	0.107425	0.419593	Lower meth.	7124
THYM	FADD	OS	0.381855	0.389137	0.543527	Lower meth.	8772
THYM	FAS	OS	0.00167555	0.0126335	0.0652168	Lower meth.	355
THYM	FASLG	OS	0.00893627	0.0320912	0.101713	Lower meth.	356
THYM	MLKL	OS	0.00161879	0.998014	1.48909e-09	Lower meth.	197259
THYM	RIPK1	OS	0.0346624	0.0537662	0.207833	Lower meth.	8737
THYM	RIPK3	OS	0.347523	0.356011	0.52038	Lower meth.	11035
THYM	TLR3	OS	0.957556	0.957558	1.03662	Higher meth.	7098
THYM	TNF	OS	0.0871066	0.109483	0.275988	Lower meth.	7124
UCEC	FADD	OS	0.304177	0.305063	1.27224	Higher meth.	8772
UCEC	FAS	OS	0.332391	0.333606	1.25517	Higher meth.	355
UCEC	FASLG	OS	0.331101	0.332162	1.25718	Higher meth.	356
UCEC	MLKL	OS	0.0281595	0.0299944	1.69307	Higher meth.	197259
UCEC	RIPK1	OS	0.650182	0.650121	0.899148	Lower meth.	8737
UCEC	RIPK3	OS	0.520506	0.520928	1.163	Higher meth.	11035
UCEC	TLR3	OS	0.709745	0.709608	1.09207	Higher meth.	7098
UCEC	TNF	OS	0.881139	0.881152	0.965568	Lower meth.	7124
UCS	FADD	OS	0.824363	0.824722	0.926942	Lower meth.	8772
UCS	FAS	OS	0.443221	0.444636	0.770202	Lower meth.	355
UCS	FASLG	OS	0.785708	0.788571	1.09584	Higher meth.	356
UCS	MLKL	OS	0.310401	0.311194	0.706653	Lower meth.	197259
UCS	RIPK1	OS	0.568859	0.572051	0.820443	Lower meth.	8737
UCS	RIPK3	OS	0.911911	0.912193	0.96255	Lower meth.	11035
UCS	TLR3	OS	0.798223	0.7984	0.916713	Lower meth.	7098
UCS	TNF	OS	0.623271	0.623869	0.846094	Lower meth.	7124
UVM	FADD	OS	0.315911	0.319141	0.65281	Lower meth.	8772
UVM	FAS	OS	0.206295	0.21191	0.578436	Lower meth.	355
UVM	FASLG	OS	0.0146458	0.0196891	0.346581	Lower meth.	356
UVM	MLKL	OS	0.0042148	0.0073568	0.278758	Lower meth.	197259
UVM	RIPK1	OS	0.59703	0.597749	1.2492	Higher meth.	8737
UVM	RIPK3	OS	0.491999	0.493455	0.750743	Lower meth.	11035
UVM	TLR3	OS	0.971225	0.971226	0.98442	Lower meth.	7098
UVM	TNF	OS	0.000197665	0.000839653	0.18014	Lower meth.	7124
