# Supplementary material for: Multi-omics analysis reveals the panoramic picture of necroptosis-related regulators in pan-cancer
Source: Aging (Albany NY). 2022 Jun 21;14(12):5034–58. doi: 10.18632/aging.204124 (PMC9271292; doi:10.18632/aging.204124)
Supplement: Supplementary Material 23 [file aging-14-204124-s023.xlsx]

## Sheet: SheetName
cancertype	symbol	EffectiveMut	NonEffectiveMut	sample_size	percentage	entrez
ACC	FADD	2	0	92	2.17391	8772
BLCA	FADD	6	3	411	1.45985	8772
BLCA	FAS	1	3	411	0.243309	355
BLCA	FASLG	2	2	411	0.486618	356
BLCA	MLKL	3	4	411	0.729927	197259
BLCA	RIPK1	7	2	411	1.70316	8737
BLCA	RIPK3	6	3	411	1.45985	11035
BLCA	TLR3	11	2	411	2.6764	7098
BLCA	TNF	3	3	411	0.729927	7124
BRCA	FAS	2	0	1026	0.194932	355
BRCA	FASLG	2	0	1026	0.194932	356
BRCA	MLKL	3	1	1026	0.292398	197259
BRCA	RIPK1	6	1	1026	0.584795	8737
BRCA	RIPK3	4	0	1026	0.389864	11035
BRCA	TLR3	10	0	1026	0.974659	7098
CESC	FADD	3	1	291	1.03093	8772
CESC	FAS	6	1	291	2.06186	355
CESC	FASLG	2	0	291	0.687285	356
CESC	MLKL	3	0	291	1.03093	197259
CESC	RIPK1	3	3	291	1.03093	8737
CESC	RIPK3	2	2	291	0.687285	11035
CESC	TLR3	5	0	291	1.71821	7098
CESC	TNF	0	1	291	0	7124
CHOL	TLR3	0	1	36	0	7098
COAD	FADD	2	3	407	0.4914	8772
COAD	FAS	7	2	407	1.7199	355
COAD	FASLG	3	4	407	0.737101	356
COAD	MLKL	3	5	407	0.737101	197259
COAD	RIPK1	10	3	407	2.457	8737
COAD	RIPK3	3	3	407	0.737101	11035
COAD	TLR3	11	2	407	2.7027	7098
COAD	TNF	1	1	407	0.2457	7124
DLBC	FAS	3	0	37	8.10811	355
DLBC	TLR3	1	0	37	2.7027	7098
DLBC	TNF	1	1	37	2.7027	7124
ESCA	FADD	1	1	185	0.540541	8772
ESCA	FASLG	1	1	185	0.540541	356
ESCA	MLKL	1	0	185	0.540541	197259
ESCA	RIPK3	0	1	185	0	11035
GBM	FAS	1	1	403	0.248139	355
GBM	FASLG	0	2	403	0	356
GBM	MLKL	2	0	403	0.496278	197259
GBM	RIPK1	2	0	403	0.496278	8737
GBM	RIPK3	3	3	403	0.744417	11035
GBM	TLR3	2	3	403	0.496278	7098
GBM	TNF	1	1	403	0.248139	7124
HNSC	FADD	3	0	509	0.589391	8772
HNSC	FAS	4	1	509	0.785855	355
HNSC	FASLG	3	3	509	0.589391	356
HNSC	MLKL	3	1	509	0.589391	197259
HNSC	RIPK1	2	4	509	0.392927	8737
HNSC	RIPK3	1	3	509	0.196464	11035
HNSC	TLR3	1	5	509	0.196464	7098
HNSC	TNF	0	1	509	0	7124
KIRC	FADD	0	2	370	0	8772
KIRC	FAS	1	0	370	0.27027	355
KIRC	MLKL	0	1	370	0	197259
KIRC	RIPK1	1	1	370	0.27027	8737
KIRC	RIPK3	2	1	370	0.540541	11035
KIRC	TNF	1	1	370	0.27027	7124
KIRP	FASLG	1	0	282	0.35461	356
KIRP	MLKL	1	1	282	0.35461	197259
KIRP	RIPK1	2	0	282	0.70922	8737
KIRP	RIPK3	1	1	282	0.35461	11035
KIRP	TLR3	2	1	282	0.70922	7098
KIRP	TNF	1	1	282	0.35461	7124
LGG	FAS	1	0	526	0.190114	355
LGG	FASLG	1	1	526	0.190114	356
LGG	MLKL	3	1	526	0.570342	197259
LGG	RIPK1	2	1	526	0.380228	8737
LGG	TLR3	2	2	526	0.380228	7098
LGG	TNF	1	1	526	0.190114	7124
LIHC	FADD	2	1	365	0.547945	8772
LIHC	FAS	1	0	365	0.273973	355
LIHC	FASLG	1	1	365	0.273973	356
LIHC	MLKL	1	1	365	0.273973	197259
LIHC	RIPK1	2	3	365	0.547945	8737
LIHC	RIPK3	3	2	365	0.821918	11035
LIHC	TLR3	4	1	365	1.09589	7098
LIHC	TNF	2	0	365	0.547945	7124
LUAD	FADD	2	3	567	0.352734	8772
LUAD	FAS	4	1	567	0.705467	355
LUAD	FASLG	10	6	567	1.76367	356
LUAD	MLKL	5	1	567	0.881834	197259
LUAD	RIPK1	9	4	567	1.5873	8737
LUAD	RIPK3	3	3	567	0.529101	11035
LUAD	TLR3	4	3	567	0.705467	7098
LUAD	TNF	2	1	567	0.352734	7124
LUSC	FADD	3	1	485	0.618557	8772
LUSC	FAS	3	2	485	0.618557	355
LUSC	FASLG	5	6	485	1.03093	356
LUSC	MLKL	5	1	485	1.03093	197259
LUSC	RIPK1	2	1	485	0.412371	8737
LUSC	RIPK3	3	1	485	0.618557	11035
LUSC	TLR3	13	3	485	2.68041	7098
LUSC	TNF	5	1	485	1.03093	7124
MESO	RIPK3	1	0	82	1.21951	11035
MESO	TNF	0	1	82	0	7124
OV	FADD	1	0	412	0.242718	8772
OV	FASLG	1	1	412	0.242718	356
OV	RIPK1	2	0	412	0.485437	8737
OV	TLR3	1	0	412	0.242718	7098
OV	TNF	2	1	412	0.485437	7124
PAAD	FASLG	1	0	178	0.561798	356
PAAD	MLKL	2	0	178	1.1236	197259
PAAD	RIPK3	1	0	178	0.561798	11035
PAAD	TLR3	1	2	178	0.561798	7098
PCPG	FADD	1	0	184	0.543478	8772
PCPG	MLKL	0	1	184	0	197259
PRAD	FASLG	1	0	498	0.200803	356
PRAD	MLKL	1	1	498	0.200803	197259
PRAD	RIPK1	1	2	498	0.200803	8737
PRAD	RIPK3	1	0	498	0.200803	11035
PRAD	TNF	1	0	498	0.200803	7124
READ	FADD	0	2	149	0	8772
READ	FAS	2	1	149	1.34228	355
READ	FASLG	1	1	149	0.671141	356
READ	MLKL	1	1	149	0.671141	197259
READ	RIPK3	2	1	149	1.34228	11035
READ	TLR3	4	2	149	2.68456	7098
SARC	FADD	0	1	239	0	8772
SARC	FAS	1	0	239	0.41841	355
SARC	MLKL	1	0	239	0.41841	197259
SARC	RIPK1	2	0	239	0.83682	8737
SARC	RIPK3	0	1	239	0	11035
SARC	TLR3	2	1	239	0.83682	7098
SARC	TNF	3	0	239	1.25523	7124
SKCM	FADD	1	1	468	0.213675	8772
SKCM	FAS	11	8	468	2.35043	355
SKCM	FASLG	21	18	468	4.48718	356
SKCM	MLKL	10	15	468	2.13675	197259
SKCM	RIPK1	14	2	468	2.99145	8737
SKCM	RIPK3	15	10	468	3.20513	11035
SKCM	TLR3	24	14	468	5.12821	7098
SKCM	TNF	1	10	468	0.213675	7124
STAD	FADD	3	0	439	0.683371	8772
STAD	FAS	5	0	439	1.13895	355
STAD	FASLG	5	4	439	1.13895	356
STAD	MLKL	5	7	439	1.13895	197259
STAD	RIPK1	3	2	439	0.683371	8737
STAD	RIPK3	3	1	439	0.683371	11035
STAD	TLR3	7	4	439	1.59453	7098
STAD	TNF	2	0	439	0.455581	7124
THCA	RIPK3	0	1	500	0	11035
THCA	TLR3	1	0	500	0.2	7098
THCA	TNF	0	1	500	0	7124
THYM	RIPK3	0	1	123	0	11035
THYM	TLR3	1	1	123	0.813008	7098
UCEC	FADD	9	6	531	1.69492	8772
UCEC	FAS	25	10	531	4.7081	355
UCEC	FASLG	17	13	531	3.20151	356
UCEC	MLKL	19	8	531	3.57815	197259
UCEC	RIPK1	29	16	531	5.46139	8737
UCEC	RIPK3	17	17	531	3.20151	11035
UCEC	TLR3	32	9	531	6.02637	7098
UCEC	TNF	7	6	531	1.31827	7124
UCS	FASLG	0	2	57	0	356
UCS	RIPK3	1	0	57	1.75439	11035
